# Supplementary material for: Increased gene dosage and mRNA expression from chromosomal duplications in C. elegans
Source: bioRxiv preprint, doi:10.1101/2022.03.22.485368, version 2 (2022-05-13)
Supplement: Supplemental File 3 [file 485368_file05.xlsx]

## Sheet: README
Column_name	Column Description
gene_ID	Gene name from C.elegans reference WS220
chr	chromosome number
start	starting coordinate of gene
stop	last coordinate of gene
ratio_CNVoverlap_genelength	ratio of bp of CNV overlapping gene by gene length, value out of 1 (Example: In strain sp117 there is a deletion peak in chrIII:5736001-5748000 and a gene within those cooridnates B0244.10 at chrIII:5733950-5737469. The gene overlaps the deletion peak by: 5737469 - 5736001 = 1468bp, the gene length of B0244.10 is 3519bp. So the ratio of the gene overlapping a CNV deletion/ gene length is: 1468bp/…
CNV_type	type of CNV, deletion or duplication
ratio_CNVoverlap_genelength(10kb)	overlap of genes affectted only by large (>10kb) CNVs, analysis performed as in "ratio_NVCoverlap_genelength"
CNV_type(10kb)	type of CNV, deletion or duplication for CNV larger than 10kb only
CNV_size	unaffected = no deletion or duplication in gene, less than 10kb = deletion or duplication of a gene that is part of a deletion or duplication less than 10kb, greater than 10kb = deletion or duplication of a gene that is part of a deletion or duplication larger than 10kb
Note: The DEseq plots across chromosomes only included genes that were detected in mRNA-seq analysis. If a gene was updated in later genome versions (above ws220) or was not detected at all (e.g. TPM = 0 in all replicates), that gene may not have been categorized. If you are checking if a particular gene is affected or not, and cannot find it in the list here, go back to Supplemental File 1 CNVna…

## Sheet: bc4289
gene_ID	chr	start	stop	CNV_overlap	CNV_type	CNV_overlap_10kb	CNV_type.10kb	CNV_size
B0454.1	chrII	3056643	3060251	1	deletion	1	deletion	greater than 10kb
C01B4.6	chrV	2501049	2502425	1	deletion	1	deletion	greater than 10kb
C01B4.9	chrV	2483002	2487784	1	deletion	1	deletion	greater than 10kb
C13B7.6	chrV	2421865	2422894	1	deletion	1	deletion	greater than 10kb
C35B1.1	chrIV	4103010	4105350	1	deletion	1	deletion	greater than 10kb
C35B1.2	chrIV	4086202	4102901	0.952153	deletion	0.952153	deletion	greater than 10kb
C35B1.7	chrIV	4109057	4110463	1	deletion	1	deletion	greater than 10kb
E01G4.1	chrII	13443114	13447525	1	deletion	1	deletion	greater than 10kb
E01G4.3	chrII	13460920	13462000	1	deletion	1	deletion	greater than 10kb
E01G4.4	chrII	13448764	13460572	1	deletion	1	deletion	greater than 10kb
F49F1.14	chrIV	4110536	4112480	1	deletion	1	deletion	greater than 10kb
F54E2.3	chrV	2781480	2801025	0.511589	deletion	0	unaffected	less than 10kb
F56A4.3	chrV	2453412	2456146	1	deletion	1	deletion	greater than 10kb
H04J21.1	chrIII	2366873	2372645	0.111573	deletion	0.111573	deletion	greater than 10kb
H14E04.2	chrIII	2376184	2384894	1	deletion	1	deletion	greater than 10kb
H14E04.3	chrIII	2384936	2386569	1	deletion	1	deletion	greater than 10kb
H14E04.5	chrIII	2394318	2401298	0.527507	deletion	0.527507	deletion	greater than 10kb
H19J13.1	chrX	12266843	12270873	0.744169	deletion	0	unaffected	less than 10kb
K07E12.1	chrIII	6746252	6794709	0.928638	deletion	0.928638	deletion	greater than 10kb
M01E10.2	chrIII	2034966	2047112	1	deletion	1	deletion	greater than 10kb
R31.1	chrV	11899544	11916604	0.761958	deletion	0.761958	deletion	greater than 10kb
T21E12.4	chrI	4386787	4403645	0.889726	deletion	0.889726	deletion	greater than 10kb
Y105E8A.13	chrI	14461139	14465223	0.788932	deletion	0.788932	deletion	greater than 10kb
Y105E8A.14	chrI	14466229	14468199	1	deletion	1	deletion	greater than 10kb
Y105E8A.16	chrI	14468308	14469342	1	deletion	1	deletion	greater than 10kb
Y105E8A.17	chrI	14469493	14476709	1	deletion	1	deletion	greater than 10kb
Y105E8A.19	chrI	14476661	14486750	1	deletion	1	deletion	greater than 10kb
Y105E8A.20	chrI	14486864	14496490	1	deletion	1	deletion	greater than 10kb
Y105E8A.21	chrI	14499714	14510542	1	deletion	1	deletion	greater than 10kb
Y105E8A.22	chrI	14512650	14518707	0.883276	deletion	0.883276	deletion	greater than 10kb
Y105E8A.28	chrI	14496797	14498279	1	deletion	1	deletion	greater than 10kb
Y110A2AL.1	chrII	2875104	2876769	1	deletion	1	deletion	greater than 10kb
Y110A2AL.10	chrII	2871381	2871919	1	deletion	1	deletion	greater than 10kb
Y110A2AL.12	chrII	2878914	2884900	1	deletion	1	deletion	greater than 10kb
Y110A2AL.13	chrII	2886381	2889009	1	deletion	1	deletion	greater than 10kb
Y110A2AL.14	chrII	2889107	2894401	1	deletion	1	deletion	greater than 10kb
Y110A2AM.1	chrII	2902965	2904005	1	deletion	1	deletion	greater than 10kb
Y110A2AM.3	chrII	2896740	2900352	1	deletion	1	deletion	greater than 10kb
Y110A2AM.4	chrII	2900051	2901323	1	deletion	1	deletion	greater than 10kb
Y110A2AR.1	chrII	2919718	2920850	0.249117	deletion	0.249117	deletion	greater than 10kb
Y110A2AR.2	chrII	2906545	2913607	1	deletion	1	deletion	greater than 10kb
Y110A2AR.3	chrII	2913714	2919318	1	deletion	1	deletion	greater than 10kb
Y19D10A.10	chrV	2361725	2367622	1	deletion	1	deletion	greater than 10kb
Y19D10A.11	chrV	2368942	2373701	1	deletion	1	deletion	greater than 10kb
Y19D10A.12	chrV	2375041	2379504	1	deletion	1	deletion	greater than 10kb
Y19D10A.7	chrV	2348213	2350324	1	deletion	1	deletion	greater than 10kb
Y25C1A.5	chrII	3078798	3087684	0.923025	deletion	0.923025	deletion	greater than 10kb
Y25C1A.6	chrII	3058260	3062115	1	deletion	1	deletion	greater than 10kb
Y25C1A.7	chrII	3062542	3071384	1	deletion	1	deletion	greater than 10kb
Y25C1A.8	chrII	3071167	3076949	1	deletion	1	deletion	greater than 10kb
Y38E10A.22	chrII	12673138	12676121	0.710694	deletion	0.710694	deletion	greater than 10kb
Y38E10A.23	chrII	12677118	12677729	1	deletion	1	deletion	greater than 10kb
Y38E10A.24	chrII	12678955	12679335	1	deletion	1	deletion	greater than 10kb
Y38E10A.5	chrII	12578352	12581003	0.000754432	deletion	0.000754432	deletion	greater than 10kb
Y38E10A.6	chrII	12582110	12603615	1	deletion	1	deletion	greater than 10kb
Y39A3A.3	chrIII	2066629	2068403	1	deletion	1	deletion	greater than 10kb
Y39A3A.4	chrIII	2072998	2076510	1	deletion	1	deletion	greater than 10kb
Y39A3B.1	chrIII	2006018	2009186	1	deletion	1	deletion	greater than 10kb
Y39A3B.2	chrIII	1997830	2002428	1	deletion	1	deletion	greater than 10kb
Y39A3B.3	chrIII	1985098	1987456	1	deletion	1	deletion	greater than 10kb
Y39A3B.5	chrIII	2009288	2021579	1	deletion	1	deletion	greater than 10kb
Y39B6A.1	chrV	19200983	19203580	0.00654601	deletion	0.00654601	deletion	greater than 10kb
Y39B6A.10	chrV	19131501	19133545	1	deletion	1	deletion	greater than 10kb
Y39B6A.11	chrV	19127500	19130953	1	deletion	1	deletion	greater than 10kb
Y39B6A.12	chrV	19119493	19124879	1	deletion	1	deletion	greater than 10kb
Y39B6A.13	chrV	19118481	19119338	1	deletion	1	deletion	greater than 10kb
Y39B6A.14	chrV	19102416	19118383	1	deletion	1	deletion	greater than 10kb
Y39B6A.16	chrV	19099055	19101079	1	deletion	1	deletion	greater than 10kb
Y39B6A.17	chrV	19076560	19082560	1	deletion	1	deletion	greater than 10kb
Y39B6A.18	chrV	19068591	19074057	0.193194	deletion	0.193194	deletion	greater than 10kb
Y39B6A.19	chrV	19060150	19066931	1	deletion	1	deletion	greater than 10kb
Y39B6A.2	chrV	19190515	19198894	1	deletion	1	deletion	greater than 10kb
Y39B6A.3	chrV	19189211	19189989	1	deletion	1	deletion	greater than 10kb
Y39B6A.47	chrV	19087685	19092632	1	deletion	1	deletion	greater than 10kb
Y39B6A.48	chrV	19174776	19187870	1	deletion	1	deletion	greater than 10kb
Y39B6A.5	chrV	19157629	19158791	1	deletion	1	deletion	greater than 10kb
Y39B6A.50	chrV	19089605	19089782	1	deletion	1	deletion	greater than 10kb
Y39B6A.6	chrV	19154076	19157676	1	deletion	1	deletion	greater than 10kb
Y39B6A.69	chrV	19152249	19152399	1	deletion	1	deletion	greater than 10kb
Y39B6A.7	chrV	19145696	19149118	1	deletion	1	deletion	greater than 10kb
Y39B6A.8	chrV	19140765	19145513	1	deletion	1	deletion	greater than 10kb
Y39B6A.9	chrV	19136479	19139021	1	deletion	1	deletion	greater than 10kb
Y45G12C.16	chrV	2530144	2531173	1	deletion	1	deletion	greater than 10kb
Y45G12C.2	chrV	2561688	2564707	0.434581	deletion	0.434581	deletion	greater than 10kb
Y46G5A.1	chrII	12694339	12725413	1	deletion	1	deletion	greater than 10kb
Y46G5A.2	chrII	12679884	12686875	1	deletion	1	deletion	greater than 10kb
Y46G5A.4	chrII	12726888	12736805	0.0112937	deletion	0.0112937	deletion	greater than 10kb
Y48C3A.10	chrII	13338208	13339917	1	deletion	1	deletion	greater than 10kb
Y48C3A.11	chrII	13340554	13347814	1	deletion	1	deletion	greater than 10kb
Y48C3A.12	chrII	13376341	13388692	1	deletion	1	deletion	greater than 10kb
Y48C3A.14	chrII	13389690	13401945	1	deletion	1	deletion	greater than 10kb
Y48C3A.16	chrII	13402909	13404559	1	deletion	1	deletion	greater than 10kb
Y48C3A.17	chrII	13406089	13411210	1	deletion	1	deletion	greater than 10kb
Y48C3A.18	chrII	13412562	13414834	1	deletion	1	deletion	greater than 10kb
Y48C3A.20	chrII	13369534	13375220	1	deletion	1	deletion	greater than 10kb
Y48C3A.3	chrII	13309219	13311439	0.197297	deletion	0.197297	deletion	greater than 10kb
Y48C3A.7	chrII	13311145	13320841	1	deletion	1	deletion	greater than 10kb
Y48C3A.8	chrII	13321942	13330755	1	deletion	1	deletion	greater than 10kb
Y48E1B.1	chrII	13542764	13547559	1	deletion	1	deletion	greater than 10kb
Y48E1B.14	chrII	13522848	13531150	0.0179475	deletion	0.0179475	deletion	greater than 10kb
Y48E1B.2	chrII	13533474	13541014	1	deletion	1	deletion	greater than 10kb
Y48E1B.3	chrII	13547178	13567929	1	deletion	1	deletion	greater than 10kb
Y48E1B.5	chrII	13568011	13574993	1	deletion	1	deletion	greater than 10kb
Y48E1B.7	chrII	13575386	13584662	0.928633	deletion	0.928633	deletion	greater than 10kb
Y48E1C.1	chrII	13414953	13424382	1	deletion	1	deletion	greater than 10kb
Y48E1C.2	chrII	13424435	13428908	1	deletion	1	deletion	greater than 10kb
Y48E1C.3	chrII	13437527	13441336	1	deletion	1	deletion	greater than 10kb
Y48E1C.4	chrII	13433809	13436755	1	deletion	1	deletion	greater than 10kb
Y52B11A.10	chrI	11039048	11052487	1	deletion	1	deletion	greater than 10kb
Y52B11A.8	chrI	11032333	11034046	0.0262697	deletion	0.0262697	deletion	greater than 10kb
Y52B11A.9	chrI	11034042	11038820	1	deletion	1	deletion	greater than 10kb
Y54E10BL.3	chrI	3003528	3005943	1	deletion	1	deletion	greater than 10kb
Y54E10BL.4	chrI	2996407	3001380	1	deletion	1	deletion	greater than 10kb
Y54E10BL.5	chrI	3001348	3002851	1	deletion	1	deletion	greater than 10kb
Y54E10BL.6	chrI	3005428	3013450	0.569933	deletion	0.569933	deletion	greater than 10kb
Y54F10AM.10	chrIII	2512637	2528618	1	deletion	1	deletion	greater than 10kb
Y54F10AM.4	chrIII	2530602	2546408	0.531317	deletion	0.531317	deletion	greater than 10kb
Y54F10AM.5	chrIII	2529048	2530494	1	deletion	1	deletion	greater than 10kb
Y54F10AM.6	chrIII	2509035	2511632	0.242973	deletion	0.242973	deletion	greater than 10kb
Y54G2A.17	chrIV	2872221	2890447	0.481675	deletion	0.481675	deletion	greater than 10kb
Y59A8B.20	chrV	17994777	18001342	0.186291	deletion	0.186291	deletion	greater than 10kb
Y59A8B.21	chrV	17986230	17994236	1	deletion	1	deletion	greater than 10kb
Y59A8B.22	chrV	17968506	17980055	1	deletion	1	deletion	greater than 10kb
Y59A8B.23	chrV	17954094	17966899	1	deletion	1	deletion	greater than 10kb
Y71F9AL.10	chrI	2866430	2869378	1	deletion	1	deletion	greater than 10kb
Y71F9AL.11	chrI	2862404	2864466	1	deletion	1	deletion	greater than 10kb
Y71F9AL.12	chrI	2871258	2875291	0.927845	deletion	0.927845	deletion	greater than 10kb
Y71F9AR.2	chrI	2983264	2985169	1	deletion	1	deletion	greater than 10kb
Y71F9AR.3	chrI	2986108	2995915	1	deletion	1	deletion	greater than 10kb
Y71F9AR.4	chrI	2981652	2983074	1	deletion	1	deletion	greater than 10kb
Y73B3A.3	chrX	84042	93664	1	deletion	1	deletion	greater than 10kb
Y73B3A.4	chrX	96341	104777	1	deletion	1	deletion	greater than 10kb
Y73B3A.5	chrX	106970	109378	0.843023	deletion	0.843023	deletion	greater than 10kb
ZK973.6	chrI	4321095	4359106	0.447213	deletion	0.447213	deletion	greater than 10kb
3R5.1	chrIII	13777588	13781032	1	duplication	1	duplication	greater than 10kb
B0001.1	chrIV	12129481	12135073	1	duplication	1	duplication	greater than 10kb
B0001.2	chrIV	12146458	12150953	1	duplication	1	duplication	greater than 10kb
B0001.3	chrIV	12143408	12145709	1	duplication	1	duplication	greater than 10kb
B0001.4	chrIV	12135057	12137325	1	duplication	1	duplication	greater than 10kb
B0001.5	chrIV	12141137	12143309	1	duplication	1	duplication	greater than 10kb
B0001.6	chrIV	12156815	12164252	1	duplication	1	duplication	greater than 10kb
B0001.7	chrIV	12150035	12154220	1	duplication	1	duplication	greater than 10kb
B0001.8	chrIV	12138822	12141036	1	duplication	1	duplication	greater than 10kb
B0350.2	chrIV	5966643	6004847	0.571825	duplication	0.571825	duplication	greater than 10kb
B0454.10	chrII	3046221	3048157	1	duplication	1	duplication	greater than 10kb
B0454.2	chrII	3051005	3052325	1	duplication	1	duplication	greater than 10kb
B0454.3	chrII	3048680	3050438	1	duplication	1	duplication	greater than 10kb
B0454.4	chrII	3044325	3046118	1	duplication	1	duplication	greater than 10kb
B0454.5	chrII	3038861	3040825	1	duplication	1	duplication	greater than 10kb
B0454.6	chrII	3032782	3036125	0.93449	duplication	0.93449	duplication	greater than 10kb
B0454.8	chrII	3040942	3043409	1	duplication	1	duplication	greater than 10kb
B0454.9	chrII	3052377	3054351	1	duplication	1	duplication	greater than 10kb
C29E6.1	chrIV	11885506	11891057	1	duplication	1	duplication	greater than 10kb
C29E6.2	chrIV	11864523	11875715	1	duplication	1	duplication	greater than 10kb
C29E6.3	chrIV	11876134	11877757	1	duplication	1	duplication	greater than 10kb
C29E6.4	chrIV	11878525	11883384	1	duplication	1	duplication	greater than 10kb
C29E6.5	chrIV	11899659	11902888	1	duplication	1	duplication	greater than 10kb
C44C8.7	chrIV	905262	906048	1	duplication	1	duplication	greater than 10kb
C44C8.8	chrIV	901109	902891	1	duplication	1	duplication	greater than 10kb
C46G7.3	chrIV	6006342	6008490	1	duplication	1	duplication	greater than 10kb
F11A10.1	chrIV	12079448	12084338	1	duplication	1	duplication	greater than 10kb
F11A10.2	chrIV	12084455	12085295	1	duplication	1	duplication	greater than 10kb
F11A10.3	chrIV	12089224	12092191	1	duplication	1	duplication	greater than 10kb
F11A10.4	chrIV	12096756	12105740	1	duplication	1	duplication	greater than 10kb
F11A10.5	chrIV	12094349	12096663	1	duplication	1	duplication	greater than 10kb
F11A10.6	chrIV	12086994	12089073	1	duplication	1	duplication	greater than 10kb
F11A10.7	chrIV	12085400	12087004	1	duplication	1	duplication	greater than 10kb
F11A10.8	chrIV	12092297	12093450	1	duplication	1	duplication	greater than 10kb
F20B10.1	chrIV	12170811	12178313	1	duplication	1	duplication	greater than 10kb
F20B10.3	chrIV	12168064	12169067	1	duplication	1	duplication	greater than 10kb
F31E9.2	chrV	17328771	17330585	1	duplication	1	duplication	greater than 10kb
F31E9.3	chrV	17322589	17324502	1	duplication	1	duplication	greater than 10kb
F31E9.4	chrV	17326427	17327942	1	duplication	1	duplication	greater than 10kb
F31E9.5	chrV	17318121	17319490	1	duplication	1	duplication	greater than 10kb
F31E9.6	chrV	17313545	17315100	1	duplication	1	duplication	greater than 10kb
F35G2.1	chrIV	12200955	12207958	1	duplication	1	duplication	greater than 10kb
F35G2.2	chrIV	12208165	12209027	1	duplication	1	duplication	greater than 10kb
F35G2.3	chrIV	12209685	12210715	1	duplication	1	duplication	greater than 10kb
F35G2.4	chrIV	12211072	12215967	1	duplication	1	duplication	greater than 10kb
F35G2.5	chrIV	12219661	12222799	0.108031	duplication	0.108031	duplication	greater than 10kb
F38H4.10	chrIV	11860531	11862476	1	duplication	1	duplication	greater than 10kb
F38H4.2	chrIV	11838956	11840400	1	duplication	1	duplication	greater than 10kb
F38H4.3	chrIV	11844423	11846327	1	duplication	1	duplication	greater than 10kb
F38H4.4	chrIV	11848226	11850198	1	duplication	1	duplication	greater than 10kb
F38H4.6	chrIV	11846981	11847745	1	duplication	1	duplication	greater than 10kb
F38H4.7	chrIV	11850904	11855136	1	duplication	1	duplication	greater than 10kb
F38H4.8	chrIV	11854955	11856353	1	duplication	1	duplication	greater than 10kb
F38H4.9	chrIV	11858408	11860439	1	duplication	1	duplication	greater than 10kb
F40D4.12	chrV	17159849	17162597	1	duplication	1	duplication	greater than 10kb
F40D4.13	chrV	17156008	17157230	1	duplication	1	duplication	greater than 10kb
F40D4.17	chrV	17154549	17155387	1	duplication	1	duplication	greater than 10kb
F40D4.6	chrV	17174013	17175506	1	duplication	1	duplication	greater than 10kb
F41A4.1	chrIV	684496	688339	0.0879521	duplication	0	unaffected	less than 10kb
F47H4.1	chrV	17348639	17350151	1	duplication	1	duplication	greater than 10kb
F47H4.10	chrV	17347880	17348687	1	duplication	1	duplication	greater than 10kb
F47H4.11	chrV	17350361	17352869	1	duplication	1	duplication	greater than 10kb
F47H4.2	chrV	17353297	17360292	1	duplication	1	duplication	greater than 10kb
F47H4.4	chrV	17331544	17335521	1	duplication	1	duplication	greater than 10kb
F47H4.8	chrV	17342767	17348214	1	duplication	1	duplication	greater than 10kb
F47H4.9	chrV	17345202	17347684	1	duplication	1	duplication	greater than 10kb
F58H7.5	chrIV	919989	920808	1	duplication	1	duplication	greater than 10kb
F58H7.7	chrIV	909414	913167	1	duplication	1	duplication	greater than 10kb
K02G10.1	chrX	4707158	4709783	0.701714	duplication	0.701714	duplication	greater than 10kb
K02G10.6	chrX	4696422	4699433	1	duplication	1	duplication	greater than 10kb
K02G10.7	chrX	4702934	4704939	1	duplication	1	duplication	greater than 10kb
K08E3.5	chrIII	13763962	13767993	0.990325	duplication	0.990325	duplication	greater than 10kb
K08E3.6	chrIII	13768439	13771141	1	duplication	1	duplication	greater than 10kb
K08E3.7	chrIII	13771346	13773257	1	duplication	1	duplication	greater than 10kb
K08E3.8	chrIII	13773352	13778829	1	duplication	1	duplication	greater than 10kb
K08E4.1	chrIV	12051461	12055949	1	duplication	1	duplication	greater than 10kb
K08E4.2	chrIV	12055647	12056626	1	duplication	1	duplication	greater than 10kb
K08E4.3	chrIV	12057603	12059930	1	duplication	1	duplication	greater than 10kb
K08E4.5	chrIV	12071528	12074892	1	duplication	1	duplication	greater than 10kb
K08E4.6	chrIV	12077078	12078142	1	duplication	1	duplication	greater than 10kb
K08E4.7	chrIV	12075794	12076927	1	duplication	1	duplication	greater than 10kb
K10G4.10	chrV	17273498	17274992	1	duplication	1	duplication	greater than 10kb
K10G4.3	chrV	17264040	17265320	1	duplication	1	duplication	greater than 10kb
K10G4.5	chrV	17298315	17301450	1	duplication	1	duplication	greater than 10kb
K11C4.1	chrV	6896980	6898478	1	duplication	1	duplication	greater than 10kb
K11C4.2	chrV	6895069	6896768	1	duplication	1	duplication	greater than 10kb
K11C4.3	chrV	6881325	6891385	0.8334	duplication	0.8334	duplication	greater than 10kb
K11C4.4	chrV	6898522	6900205	1	duplication	1	duplication	greater than 10kb
K11C4.5	chrV	6901668	6929020	1	duplication	1	duplication	greater than 10kb
M117.4	chrIV	11830775	11833522	1	duplication	1	duplication	greater than 10kb
M117.6	chrIV	11827525	11828098	0.169284	duplication	0.169284	duplication	greater than 10kb
M18.1	chrIV	12108648	12110236	1	duplication	1	duplication	greater than 10kb
M18.2	chrIV	12110564	12111555	1	duplication	1	duplication	greater than 10kb
M18.3	chrIV	12105835	12108375	1	duplication	1	duplication	greater than 10kb
M18.5	chrIV	12114789	12121145	1	duplication	1	duplication	greater than 10kb
M18.6	chrIV	12121354	12122860	1	duplication	1	duplication	greater than 10kb
M18.7	chrIV	12123132	12125162	1	duplication	1	duplication	greater than 10kb
M18.8	chrIV	12124927	12126766	1	duplication	1	duplication	greater than 10kb
M199.1	chrIV	15103596	15106451	1	duplication	1	duplication	greater than 10kb
M199.2	chrIV	15108740	15110883	1	duplication	1	duplication	greater than 10kb
M199.3	chrIV	15115536	15120209	1	duplication	1	duplication	greater than 10kb
M199.4	chrIV	15124900	15126089	1	duplication	1	duplication	greater than 10kb
M199.5	chrIV	15129629	15131754	1	duplication	1	duplication	greater than 10kb
M199.7	chrIV	15123149	15124361	1	duplication	1	duplication	greater than 10kb
M199.8	chrIV	15133802	15133967	1	duplication	1	duplication	greater than 10kb
T06F4.1	chrX	4056793	4071469	0.0141047	duplication	0.0141047	duplication	greater than 10kb
T12G3.1	chrIV	12034229	12037029	1	duplication	1	duplication	greater than 10kb
T12G3.2	chrIV	12038964	12046888	1	duplication	1	duplication	greater than 10kb
T12G3.4	chrIV	12048245	12049921	1	duplication	1	duplication	greater than 10kb
T12G3.5	chrIV	12031301	12032132	1	duplication	1	duplication	greater than 10kb
T12G3.6	chrIV	12030025	12030867	1	duplication	1	duplication	greater than 10kb
T12G3.7	chrIV	12026860	12029455	1	duplication	1	duplication	greater than 10kb
T12G3.8	chrIV	12049238	12051204	1	duplication	1	duplication	greater than 10kb
T19C9.10	chrV	17236681	17238072	1	duplication	1	duplication	greater than 10kb
T19C9.2	chrV	17225060	17226194	1	duplication	1	duplication	greater than 10kb
T19C9.8	chrV	17239071	17240631	1	duplication	1	duplication	greater than 10kb
T27C5.12	chrV	17415252	17416718	1	duplication	1	duplication	greater than 10kb
T27C5.8	chrV	17417107	17418366	1	duplication	1	duplication	greater than 10kb
VZK822L.1	chrIV	11913666	11917317	1	duplication	1	duplication	greater than 10kb
VZK822L.2	chrIV	11911627	11913222	1	duplication	1	duplication	greater than 10kb
W01F3.3	chrV	20667179	20678643	0.943911	duplication	0.943911	duplication	greater than 10kb
Y20C6A.1	chrV	17371518	17376712	1	duplication	1	duplication	greater than 10kb
Y20C6A.2	chrV	17377396	17379201	1	duplication	1	duplication	greater than 10kb
Y20C6A.4	chrV	17380206	17381094	1	duplication	1	duplication	greater than 10kb
Y40H7A.1	chrIV	15143740	15147172	1	duplication	1	duplication	greater than 10kb
Y40H7A.3	chrIV	15161124	15164875	1	duplication	1	duplication	greater than 10kb
Y40H7A.4	chrIV	15167767	15175504	1	duplication	1	duplication	greater than 10kb
Y40H7A.5	chrIV	15179889	15182921	1	duplication	1	duplication	greater than 10kb
Y40H7A.8	chrIV	15139068	15140900	1	duplication	1	duplication	greater than 10kb
Y41E3.18	chrIV	15061896	15065716	1	duplication	1	duplication	greater than 10kb
Y41E3.19	chrIV	15056128	15057844	0.491259	duplication	0.491259	duplication	greater than 10kb
Y57E12B.3	chrV	6931531	6935843	1	duplication	1	duplication	greater than 10kb
Y59A8B.7	chrV	18043540	18052295	0.604683	duplication	0.604683	duplication	greater than 10kb
Y59A8B.8	chrV	18062006	18066281	0.466433	duplication	0.466433	duplication	greater than 10kb
Y59A8B.9	chrV	18055940	18060680	1	duplication	1	duplication	greater than 10kb
Y61B8A.1	chrV	17252905	17255103	1	duplication	1	duplication	greater than 10kb
Y61B8A.4	chrV	17259155	17260533	1	duplication	1	duplication	greater than 10kb
Y61B8B.1	chrV	17303028	17304413	1	duplication	1	duplication	greater than 10kb
Y68A4A.10	chrV	17202121	17205315	1	duplication	1	duplication	greater than 10kb
Y68A4A.13	chrV	17207184	17208117	1	duplication	1	duplication	greater than 10kb
Y68A4A.7	chrV	17213017	17214187	1	duplication	1	duplication	greater than 10kb
Y68A4B.2	chrV	17243741	17245481	1	duplication	1	duplication	greater than 10kb
Y68A4B.3	chrV	17241682	17242627	1	duplication	1	duplication	greater than 10kb
Y73B6A.1	chrIV	6661222	6668043	0.00615746	duplication	0.00615746	duplication	greater than 10kb
Y73B6A.2	chrIV	6733463	6736121	0.202032	duplication	0.202032	duplication	greater than 10kb
Y73B6A.6	chrIV	6704904	6705723	1	duplication	1	duplication	greater than 10kb
ZC412.6	chrV	14878308	14878487	1	duplication	1	duplication	greater than 10kb
ZK262.8	chrV	18438352	18440167	1	duplication	1	duplication	greater than 10kb
ZK617.1	chrIV	11972684	12010984	1	duplication	1	duplication	greater than 10kb
ZK617.2	chrIV	12014259	12015636	1	duplication	1	duplication	greater than 10kb
ZK617.3	chrIV	12013427	12014027	1	duplication	1	duplication	greater than 10kb
ZK822.1	chrIV	11918086	11922105	1	duplication	1	duplication	greater than 10kb
ZK822.2	chrIV	11922334	11923171	1	duplication	1	duplication	greater than 10kb
ZK822.3	chrIV	11930846	11935691	1	duplication	1	duplication	greater than 10kb
ZK822.4	chrIV	11925999	11928403	1	duplication	1	duplication	greater than 10kb
ZK822.5	chrIV	11937379	11940632	1	duplication	1	duplication	greater than 10kb
ZK822.6	chrIV	11924618	11925328	1	duplication	1	duplication	greater than 10kb
ZK829.1	chrIV	11940579	11942362	1	duplication	1	duplication	greater than 10kb
ZK829.10	chrIV	11965579	11968680	1	duplication	1	duplication	greater than 10kb
ZK829.2	chrIV	11946082	11949794	1	duplication	1	duplication	greater than 10kb
ZK829.3	chrIV	11943301	11945698	1	duplication	1	duplication	greater than 10kb
ZK829.4	chrIV	11953219	11955521	1	duplication	1	duplication	greater than 10kb
ZK829.5	chrIV	11950571	11952181	1	duplication	1	duplication	greater than 10kb
ZK829.6	chrIV	11957519	11959783	1	duplication	1	duplication	greater than 10kb
ZK829.7	chrIV	11959876	11961514	1	duplication	1	duplication	greater than 10kb
ZK829.8	chrIV	11963886	11965404	1	duplication	1	duplication	greater than 10kb
ZK829.9	chrIV	11970510	11973460	1	duplication	1	duplication	greater than 10kb
2L52.1	chrII	1866	4663	0	unaffected	0	unaffected	unaffected
2RSSE.1	chrII	15268135	15273238	0	unaffected	0	unaffected	unaffected
2RSSE.2	chrII	15274314	15275613	0	unaffected	0	unaffected	unaffected
4R79.1	chrIV	17486945	17490461	0	unaffected	0	unaffected	unaffected
4R79.2	chrIV	17480359	17483294	0	unaffected	0	unaffected	unaffected
6R55.2	chrX	17714379	17714756	0	unaffected	0	unaffected	unaffected
AC3.1	chrV	10368532	10369845	0	unaffected	0	unaffected	unaffected
AC3.10	chrV	10384133	10385688	0	unaffected	0	unaffected	unaffected
AC3.2	chrV	10372117	10374238	0	unaffected	0	unaffected	unaffected
AC3.3	chrV	10380315	10381800	0	unaffected	0	unaffected	unaffected
AC3.4	chrV	10382418	10383953	0	unaffected	0	unaffected	unaffected
AC3.5	chrV	10388446	10393480	0	unaffected	0	unaffected	unaffected
AC3.6	chrV	10393507	10395209	0	unaffected	0	unaffected	unaffected
AC3.7	chrV	10395653	10397794	0	unaffected	0	unaffected	unaffected
AC3.8	chrV	10398786	10401290	0	unaffected	0	unaffected	unaffected
AC7.1	chrIV	5112920	5122011	0	unaffected	0	unaffected	unaffected
AC7.2	chrIV	5126997	5145802	0	unaffected	0	unaffected	unaffected
AC7.3	chrIV	5111677	5112867	0	unaffected	0	unaffected	unaffected
AC8.4	chrX	226650	227394	0	unaffected	0	unaffected	unaffected
AH10.1	chrV	14146493	14148769	0	unaffected	0	unaffected	unaffected
AH10.2	chrV	14156815	14157607	0	unaffected	0	unaffected	unaffected
AH10.3	chrV	14144014	14145396	0	unaffected	0	unaffected	unaffected
AH10.4	chrV	14137332	14137845	0	unaffected	0	unaffected	unaffected
AH6.1	chrII	9512430	9516877	0	unaffected	0	unaffected	unaffected
AH6.10	chrII	9548345	9549639	0	unaffected	0	unaffected	unaffected
AH6.2	chrII	9517508	9518837	0	unaffected	0	unaffected	unaffected
AH6.3	chrII	9519036	9520151	0	unaffected	0	unaffected	unaffected
AH6.4	chrII	9520140	9521611	0	unaffected	0	unaffected	unaffected
AH6.5	chrII	9524112	9526307	0	unaffected	0	unaffected	unaffected
AH9.1	chrX	2243225	2247000	0	unaffected	0	unaffected	unaffected
AH9.2	chrX	2255839	2258073	0	unaffected	0	unaffected	unaffected
AH9.3	chrX	2259143	2260518	0	unaffected	0	unaffected	unaffected
AH9.4	chrX	2271016	2274329	0	unaffected	0	unaffected	unaffected
AH9.6	chrX	2263167	2267464	0	unaffected	0	unaffected	unaffected
AH9.7	chrX	2243144	2244459	0	unaffected	0	unaffected	unaffected
B0019.1	chrI	12759575	12764950	0	unaffected	0	unaffected	unaffected
B0019.2	chrI	12773646	12782247	0	unaffected	0	unaffected	unaffected
B0024.1	chrV	10291670	10292843	0	unaffected	0	unaffected	unaffected
B0024.10	chrV	10315224	10317371	0	unaffected	0	unaffected	unaffected
B0024.11	chrV	10317464	10319509	0	unaffected	0	unaffected	unaffected
B0024.12	chrV	10319508	10320161	0	unaffected	0	unaffected	unaffected
B0024.13	chrV	10320689	10322190	0	unaffected	0	unaffected	unaffected
B0024.14	chrV	10322261	10332087	0	unaffected	0	unaffected	unaffected
B0024.15	chrV	10289695	10291685	0	unaffected	0	unaffected	unaffected
B0024.2	chrV	10293492	10294596	0	unaffected	0	unaffected	unaffected
B0024.3	chrV	10287538	10289247	0	unaffected	0	unaffected	unaffected
B0024.4	chrV	10297373	10298957	0	unaffected	0	unaffected	unaffected
B0024.6	chrV	10308265	10314343	0	unaffected	0	unaffected	unaffected
B0024.8	chrV	10299447	10307329	0	unaffected	0	unaffected	unaffected
B0024.9	chrV	10314615	10315751	0	unaffected	0	unaffected	unaffected
B0025.1	chrI	6028487	6033460	0	unaffected	0	unaffected	unaffected
B0025.2	chrI	6022658	6026983	0	unaffected	0	unaffected	unaffected
B0025.4	chrI	6027193	6028373	0	unaffected	0	unaffected	unaffected
B0025.5	chrI	6024152	6024957	0	unaffected	0	unaffected	unaffected
B0034.1	chrII	5970079	5972638	0	unaffected	0	unaffected	unaffected
B0034.3	chrII	5945380	5956660	0	unaffected	0	unaffected	unaffected
B0034.4	chrII	5968109	5969033	0	unaffected	0	unaffected	unaffected
B0034.5	chrII	5972830	5974952	0	unaffected	0	unaffected	unaffected
B0034.7	chrII	5961651	5961975	0	unaffected	0	unaffected	unaffected
B0035.1	chrIV	11310949	11312475	0	unaffected	0	unaffected	unaffected
B0035.10	chrIV	11326534	11327321	0	unaffected	0	unaffected	unaffected
B0035.11	chrIV	11327591	11329349	0	unaffected	0	unaffected	unaffected
B0035.12	chrIV	11329443	11332922	0	unaffected	0	unaffected	unaffected
B0035.13	chrIV	11304698	11306698	0	unaffected	0	unaffected	unaffected
B0035.14	chrIV	11298985	11304765	0	unaffected	0	unaffected	unaffected
B0035.15	chrIV	11296968	11298397	0	unaffected	0	unaffected	unaffected
B0035.16	chrIV	11295125	11296867	0	unaffected	0	unaffected	unaffected
B0035.18	chrIV	11320297	11320621	0	unaffected	0	unaffected	unaffected
B0035.2	chrIV	11312450	11313960	0	unaffected	0	unaffected	unaffected
B0035.3	chrIV	11314054	11315028	0	unaffected	0	unaffected	unaffected
B0035.4	chrIV	11315182	11315855	0	unaffected	0	unaffected	unaffected
B0035.5	chrIV	11317394	11319928	0	unaffected	0	unaffected	unaffected
B0035.6	chrIV	11320777	11323614	0	unaffected	0	unaffected	unaffected
B0035.7	chrIV	11323862	11324448	0	unaffected	0	unaffected	unaffected
B0035.8	chrIV	11324696	11325200	0	unaffected	0	unaffected	unaffected
B0035.9	chrIV	11325995	11326307	0	unaffected	0	unaffected	unaffected
B0041.1	chrI	4664499	4665349	0	unaffected	0	unaffected	unaffected
B0041.2	chrI	4653471	4660152	0	unaffected	0	unaffected	unaffected
B0041.3	chrI	4644437	4645627	0	unaffected	0	unaffected	unaffected
B0041.4	chrI	4645636	4646966	0	unaffected	0	unaffected	unaffected
B0041.5	chrI	4648269	4650771	0	unaffected	0	unaffected	unaffected
B0041.6	chrI	4652143	4652907	0	unaffected	0	unaffected	unaffected
B0041.7	chrI	4665744	4671739	0	unaffected	0	unaffected	unaffected
B0041.8	chrI	4647309	4648279	0	unaffected	0	unaffected	unaffected
B0047.1	chrII	2040275	2041620	0	unaffected	0	unaffected	unaffected
B0047.2	chrII	2043027	2044109	0	unaffected	0	unaffected	unaffected
B0047.3	chrII	2044628	2046589	0	unaffected	0	unaffected	unaffected
B0198.1	chrX	12031377	12033969	0	unaffected	0	unaffected	unaffected
B0198.2	chrX	12028642	12031549	0	unaffected	0	unaffected	unaffected
B0198.3	chrX	12042547	12049279	0	unaffected	0	unaffected	unaffected
B0205.1	chrI	10713438	10718190	0	unaffected	0	unaffected	unaffected
B0205.10	chrI	10708351	10710364	0	unaffected	0	unaffected	unaffected
B0205.11	chrI	10732530	10733674	0	unaffected	0	unaffected	unaffected
B0205.12	chrI	10730455	10730701	0	unaffected	0	unaffected	unaffected
B0205.13	chrI	10727739	10728784	0	unaffected	0	unaffected	unaffected
B0205.14	chrI	10726906	10727340	0	unaffected	0	unaffected	unaffected
B0205.3	chrI	10730717	10732437	0	unaffected	0	unaffected	unaffected
B0205.4	chrI	10741357	10744432	0	unaffected	0	unaffected	unaffected
B0205.5	chrI	10740206	10740579	0	unaffected	0	unaffected	unaffected
B0205.6	chrI	10736685	10739900	0	unaffected	0	unaffected	unaffected
B0205.7	chrI	10734010	10736610	0	unaffected	0	unaffected	unaffected
B0205.8	chrI	10728883	10730226	0	unaffected	0	unaffected	unaffected
B0205.9	chrI	10720814	10723580	0	unaffected	0	unaffected	unaffected
B0207.1	chrI	5965063	5967213	0	unaffected	0	unaffected	unaffected
B0207.10	chrI	5959009	5959528	0	unaffected	0	unaffected	unaffected
B0207.12	chrI	5967252	5973322	0	unaffected	0	unaffected	unaffected
B0207.2	chrI	5955031	5956885	0	unaffected	0	unaffected	unaffected
B0207.3	chrI	5942420	5945539	0	unaffected	0	unaffected	unaffected
B0207.4	chrI	5937478	5938887	0	unaffected	0	unaffected	unaffected
B0207.5	chrI	5919788	5935418	0	unaffected	0	unaffected	unaffected
B0207.6	chrI	5935371	5936946	0	unaffected	0	unaffected	unaffected
B0207.7	chrI	5945758	5947344	0	unaffected	0	unaffected	unaffected
B0207.9	chrI	5957461	5958361	0	unaffected	0	unaffected	unaffected
B0212.1	chrIV	3572466	3577625	0	unaffected	0	unaffected	unaffected
B0212.2	chrIV	3565196	3567810	0	unaffected	0	unaffected	unaffected
B0212.3	chrIV	3540183	3543598	0	unaffected	0	unaffected	unaffected
B0212.4	chrIV	3543623	3547596	0	unaffected	0	unaffected	unaffected
B0212.5	chrIV	3550883	3557427	0	unaffected	0	unaffected	unaffected
B0212.6	chrIV	3570714	3571642	0	unaffected	0	unaffected	unaffected
B0213.10	chrV	3955750	3957700	0	unaffected	0	unaffected	unaffected
B0213.11	chrV	3958223	3961174	0	unaffected	0	unaffected	unaffected
B0213.12	chrV	3961744	3963800	0	unaffected	0	unaffected	unaffected
B0213.14	chrV	3964763	3967856	0	unaffected	0	unaffected	unaffected
B0213.15	chrV	3968117	3970499	0	unaffected	0	unaffected	unaffected
B0213.16	chrV	3970696	3972986	0	unaffected	0	unaffected	unaffected
B0213.17	chrV	3978810	3979119	0	unaffected	0	unaffected	unaffected
B0213.2	chrV	3989075	3989755	0	unaffected	0	unaffected	unaffected
B0213.3	chrV	3987884	3988302	0	unaffected	0	unaffected	unaffected
B0213.4	chrV	3984397	3984834	0	unaffected	0	unaffected	unaffected
B0213.5	chrV	3981964	3982730	0	unaffected	0	unaffected	unaffected
B0213.6	chrV	3980039	3980614	0	unaffected	0	unaffected	unaffected
B0213.7	chrV	3977248	3978796	0	unaffected	0	unaffected	unaffected
B0213.8	chrV	3974645	3976249	0	unaffected	0	unaffected	unaffected
B0218.1	chrIV	8159343	8162028	0	unaffected	0	unaffected	unaffected
B0218.2	chrIV	8152428	8154845	0	unaffected	0	unaffected	unaffected
B0218.3	chrIV	8148779	8150727	0	unaffected	0	unaffected	unaffected
B0218.5	chrIV	8155236	8156433	0	unaffected	0	unaffected	unaffected
B0218.6	chrIV	8161737	8163781	0	unaffected	0	unaffected	unaffected
B0218.7	chrIV	8164579	8166064	0	unaffected	0	unaffected	unaffected
B0218.8	chrIV	8167148	8168760	0	unaffected	0	unaffected	unaffected
B0222.1	chrV	9134276	9135553	0	unaffected	0	unaffected	unaffected
B0222.10	chrV	9158360	9159515	0	unaffected	0	unaffected	unaffected
B0222.11	chrV	9165796	9168018	0	unaffected	0	unaffected	unaffected
B0222.3	chrV	9138927	9141375	0	unaffected	0	unaffected	unaffected
B0222.4	chrV	9144592	9146877	0	unaffected	0	unaffected	unaffected
B0222.5	chrV	9152298	9154850	0	unaffected	0	unaffected	unaffected
B0222.6	chrV	9159618	9160640	0	unaffected	0	unaffected	unaffected
B0222.7	chrV	9162027	9162982	0	unaffected	0	unaffected	unaffected
B0222.8	chrV	9164271	9165284	0	unaffected	0	unaffected	unaffected
B0222.9	chrV	9168368	9173001	0	unaffected	0	unaffected	unaffected
B0228.1	chrII	7755955	7756856	0	unaffected	0	unaffected	unaffected
B0228.4	chrII	7724849	7752673	0	unaffected	0	unaffected	unaffected
B0228.5	chrII	7752516	7753554	0	unaffected	0	unaffected	unaffected
B0228.6	chrII	7754514	7755104	0	unaffected	0	unaffected	unaffected
B0228.7	chrII	7757134	7758387	0	unaffected	0	unaffected	unaffected
B0228.9	chrII	7762009	7763617	0	unaffected	0	unaffected	unaffected
B0238.1	chrV	5240753	5243120	0	unaffected	0	unaffected	unaffected
B0238.10	chrV	5274057	5275546	0	unaffected	0	unaffected	unaffected
B0238.11	chrV	5269466	5270728	0	unaffected	0	unaffected	unaffected
B0238.12	chrV	5267805	5268807	0	unaffected	0	unaffected	unaffected
B0238.13	chrV	5243712	5248024	0	unaffected	0	unaffected	unaffected
B0238.15	chrV	5240172	5240435	0	unaffected	0	unaffected	unaffected
B0238.6	chrV	5258019	5259532	0	unaffected	0	unaffected	unaffected
B0238.7	chrV	5260315	5263083	0	unaffected	0	unaffected	unaffected
B0238.8	chrV	5263934	5265760	0	unaffected	0	unaffected	unaffected
B0238.9	chrV	5275532	5278290	0	unaffected	0	unaffected	unaffected
B0240.1	chrV	11727879	11730142	0	unaffected	0	unaffected	unaffected
B0240.2	chrV	11733525	11736950	0	unaffected	0	unaffected	unaffected
B0240.3	chrV	11718070	11725634	0	unaffected	0	unaffected	unaffected
B0240.4	chrV	11730973	11733461	0	unaffected	0	unaffected	unaffected
B0244.10	chrIII	5733950	5737469	0	unaffected	0	unaffected	unaffected
B0244.11	chrIII	5767836	5768620	0	unaffected	0	unaffected	unaffected
B0244.2	chrIII	5755492	5765769	0	unaffected	0	unaffected	unaffected
B0244.4	chrIII	5747438	5751562	0	unaffected	0	unaffected	unaffected
B0244.5	chrIII	5744832	5747149	0	unaffected	0	unaffected	unaffected
B0244.6	chrIII	5737961	5744774	0	unaffected	0	unaffected	unaffected
B0244.7	chrIII	5731454	5732808	0	unaffected	0	unaffected	unaffected
B0244.8	chrIII	5728131	5730348	0	unaffected	0	unaffected	unaffected
B0250.1	chrV	20479655	20480815	0	unaffected	0	unaffected	unaffected
B0250.2	chrV	20476716	20479058	0	unaffected	0	unaffected	unaffected
B0250.4	chrV	20458622	20464455	0	unaffected	0	unaffected	unaffected
B0250.5	chrV	20493892	20497315	0	unaffected	0	unaffected	unaffected
B0250.8	chrV	20469671	20470454	0	unaffected	0	unaffected	unaffected
B0250.9	chrV	20480760	20485354	0	unaffected	0	unaffected	unaffected
B0252.1	chrII	6919686	6923621	0	unaffected	0	unaffected	unaffected
B0252.2	chrII	6910027	6912653	0	unaffected	0	unaffected	unaffected
B0252.3	chrII	6902825	6907713	0	unaffected	0	unaffected	unaffected
B0252.4	chrII	6912497	6913321	0	unaffected	0	unaffected	unaffected
B0252.5	chrII	6916948	6918878	0	unaffected	0	unaffected	unaffected
B0252.8	chrII	6916111	6916923	0	unaffected	0	unaffected	unaffected
B0261.1	chrI	5263696	5268387	0	unaffected	0	unaffected	unaffected
B0261.2	chrI	5245742	5263429	0	unaffected	0	unaffected	unaffected
B0261.4	chrI	5244285	5245526	0	unaffected	0	unaffected	unaffected
B0261.5	chrI	5249774	5250440	0	unaffected	0	unaffected	unaffected
B0261.6	chrI	5255449	5256926	0	unaffected	0	unaffected	unaffected
B0261.7	chrI	5269546	5270937	0	unaffected	0	unaffected	unaffected
B0261.8	chrI	5271279	5272040	0	unaffected	0	unaffected	unaffected
B0261.9	chrI	5268421	5269466	0	unaffected	0	unaffected	unaffected
B0272.1	chrX	9434392	9436834	0	unaffected	0	unaffected	unaffected
B0272.2	chrX	9440338	9441505	0	unaffected	0	unaffected	unaffected
B0272.3	chrX	9431365	9432689	0	unaffected	0	unaffected	unaffected
B0272.4	chrX	9428371	9430264	0	unaffected	0	unaffected	unaffected
B0273.1	chrIV	5493985	5495241	0	unaffected	0	unaffected	unaffected
B0273.2	chrIV	5486675	5490322	0	unaffected	0	unaffected	unaffected
B0273.3	chrIV	5484036	5486201	0	unaffected	0	unaffected	unaffected
B0273.4	chrIV	5495656	5516256	0	unaffected	0	unaffected	unaffected
B0280.1	chrIII	7133726	7136401	0	unaffected	0	unaffected	unaffected
B0280.10	chrIII	7131971	7133616	0	unaffected	0	unaffected	unaffected
B0280.11	chrIII	7136445	7138216	0	unaffected	0	unaffected	unaffected
B0280.12	chrIII	7138620	7144770	0	unaffected	0	unaffected	unaffected
B0280.13	chrIII	7128836	7131986	0	unaffected	0	unaffected	unaffected
B0280.17	chrIII	7134959	7136065	0	unaffected	0	unaffected	unaffected
B0280.2	chrIII	7124601	7128320	0	unaffected	0	unaffected	unaffected
B0280.3	chrIII	7123061	7124270	0	unaffected	0	unaffected	unaffected
B0280.4	chrIII	7108259	7109248	0	unaffected	0	unaffected	unaffected
B0280.5	chrIII	7102023	7103930	0	unaffected	0	unaffected	unaffected
B0280.7	chrIII	7110240	7111811	0	unaffected	0	unaffected	unaffected
B0280.8	chrIII	7112236	7115378	0	unaffected	0	unaffected	unaffected
B0280.9	chrIII	7120841	7122833	0	unaffected	0	unaffected	unaffected
B0281.1	chrII	2313071	2314932	0	unaffected	0	unaffected	unaffected
B0281.3	chrII	2307045	2308356	0	unaffected	0	unaffected	unaffected
B0281.4	chrII	2297851	2298798	0	unaffected	0	unaffected	unaffected
B0281.5	chrII	2299844	2300887	0	unaffected	0	unaffected	unaffected
B0281.6	chrII	2301312	2302234	0	unaffected	0	unaffected	unaffected
B0284.1	chrIII	4376474	4379172	0	unaffected	0	unaffected	unaffected
B0284.2	chrIII	4381710	4384113	0	unaffected	0	unaffected	unaffected
B0284.3	chrIII	4379339	4381013	0	unaffected	0	unaffected	unaffected
B0284.4	chrIII	4384758	4387729	0	unaffected	0	unaffected	unaffected
B0285.1	chrIII	4333368	4340455	0	unaffected	0	unaffected	unaffected
B0285.10	chrIII	4370856	4372792	0	unaffected	0	unaffected	unaffected
B0285.3	chrIII	4341656	4343308	0	unaffected	0	unaffected	unaffected
B0285.4	chrIII	4343432	4345194	0	unaffected	0	unaffected	unaffected
B0285.5	chrIII	4345308	4350051	0	unaffected	0	unaffected	unaffected
B0285.6	chrIII	4352217	4355860	0	unaffected	0	unaffected	unaffected
B0285.7	chrIII	4356510	4364944	0	unaffected	0	unaffected	unaffected
B0285.8	chrIII	4365346	4367441	0	unaffected	0	unaffected	unaffected
B0285.9	chrIII	4367803	4370132	0	unaffected	0	unaffected	unaffected
B0286.1	chrII	4378658	4386355	0	unaffected	0	unaffected	unaffected
B0286.2	chrII	4359085	4368285	0	unaffected	0	unaffected	unaffected
B0286.3	chrII	4369628	4372572	0	unaffected	0	unaffected	unaffected
B0286.4	chrII	4372743	4376745	0	unaffected	0	unaffected	unaffected
B0286.5	chrII	4379885	4383290	0	unaffected	0	unaffected	unaffected
B0294.1	chrX	1896656	1897337	0	unaffected	0	unaffected	unaffected
B0302.1	chrX	17186065	17193219	0	unaffected	0	unaffected	unaffected
B0302.2	chrX	17178464	17178918	0	unaffected	0	unaffected	unaffected
B0302.4	chrX	17176415	17176703	0	unaffected	0	unaffected	unaffected
B0302.5	chrX	17193223	17195044	0	unaffected	0	unaffected	unaffected
B0303.11	chrIII	8703225	8710031	0	unaffected	0	unaffected	unaffected
B0303.14	chrIII	8713907	8716103	0	unaffected	0	unaffected	unaffected
B0303.15	chrIII	8717560	8718486	0	unaffected	0	unaffected	unaffected
B0303.16	chrIII	8705029	8706266	0	unaffected	0	unaffected	unaffected
B0303.2	chrIII	8684726	8686400	0	unaffected	0	unaffected	unaffected
B0303.3	chrIII	8686036	8688396	0	unaffected	0	unaffected	unaffected
B0303.4	chrIII	8689768	8693393	0	unaffected	0	unaffected	unaffected
B0303.7	chrIII	8693556	8699374	0	unaffected	0	unaffected	unaffected
B0303.8	chrIII	8699401	8700254	0	unaffected	0	unaffected	unaffected
B0303.9	chrIII	8700847	8703225	0	unaffected	0	unaffected	unaffected
B0304.2	chrII	4523611	4524523	0	unaffected	0	unaffected	unaffected
B0304.3	chrII	4512207	4522763	0	unaffected	0	unaffected	unaffected
B0304.4	chrII	4522458	4523219	0	unaffected	0	unaffected	unaffected
B0304.5	chrII	4529632	4531961	0	unaffected	0	unaffected	unaffected
B0304.6	chrII	4534738	4537238	0	unaffected	0	unaffected	unaffected
B0304.7	chrII	4541861	4543665	0	unaffected	0	unaffected	unaffected
B0304.8	chrII	4524630	4527897	0	unaffected	0	unaffected	unaffected
B0304.9	chrII	4538984	4540728	0	unaffected	0	unaffected	unaffected
B0310.1	chrX	493236	497214	0	unaffected	0	unaffected	unaffected
B0310.2	chrX	501965	506944	0	unaffected	0	unaffected	unaffected
B0310.3	chrX	510899	514483	0	unaffected	0	unaffected	unaffected
B0310.5	chrX	525928	530177	0	unaffected	0	unaffected	unaffected
B0310.6	chrX	530625	530962	0	unaffected	0	unaffected	unaffected
B0331.1	chrV	9654680	9657925	0	unaffected	0	unaffected	unaffected
B0331.2	chrV	9658906	9661590	0	unaffected	0	unaffected	unaffected
B0334.1	chrII	11485445	11486710	0	unaffected	0	unaffected	unaffected
B0334.11	chrII	11493166	11495250	0	unaffected	0	unaffected	unaffected
B0334.13	chrII	11488222	11489555	0	unaffected	0	unaffected	unaffected
B0334.15	chrII	11496713	11499556	0	unaffected	0	unaffected	unaffected
B0334.2	chrII	11483136	11485295	0	unaffected	0	unaffected	unaffected
B0334.3	chrII	11489540	11492957	0	unaffected	0	unaffected	unaffected
B0334.4	chrII	11495627	11496605	0	unaffected	0	unaffected	unaffected
B0334.6	chrII	11510610	11513826	0	unaffected	0	unaffected	unaffected
B0334.7	chrII	11515010	11518090	0	unaffected	0	unaffected	unaffected
B0334.8	chrII	11519434	11526998	0	unaffected	0	unaffected	unaffected
B0336.1	chrIII	5722803	5727068	0	unaffected	0	unaffected	unaffected
B0336.10	chrIII	5705467	5706281	0	unaffected	0	unaffected	unaffected
B0336.11	chrIII	5706691	5709284	0	unaffected	0	unaffected	unaffected
B0336.12	chrIII	5710016	5710464	0	unaffected	0	unaffected	unaffected
B0336.13	chrIII	5693990	5695178	0	unaffected	0	unaffected	unaffected
B0336.2	chrIII	5716067	5717541	0	unaffected	0	unaffected	unaffected
B0336.3	chrIII	5711502	5714801	0	unaffected	0	unaffected	unaffected
B0336.4	chrIII	5698389	5702257	0	unaffected	0	unaffected	unaffected
B0336.5	chrIII	5692874	5693893	0	unaffected	0	unaffected	unaffected
B0336.6	chrIII	5690061	5692695	0	unaffected	0	unaffected	unaffected
B0336.7	chrIII	5694689	5697320	0	unaffected	0	unaffected	unaffected
B0336.8	chrIII	5697430	5697964	0	unaffected	0	unaffected	unaffected
B0336.9	chrIII	5702209	5705421	0	unaffected	0	unaffected	unaffected
B0344.2	chrX	1576629	1590890	0	unaffected	0	unaffected	unaffected
B0348.2	chrV	45462	46923	0	unaffected	0	unaffected	unaffected
B0348.4	chrV	20824	43971	0	unaffected	0	unaffected	unaffected
B0348.5	chrV	5689	6511	0	unaffected	0	unaffected	unaffected
B0348.6	chrV	6588	7822	0	unaffected	0	unaffected	unaffected
B0353.1	chrIII	557514	572134	0	unaffected	0	unaffected	unaffected
B0361.10	chrIII	7285913	7287541	0	unaffected	0	unaffected	unaffected
B0361.11	chrIII	7277539	7281153	0	unaffected	0	unaffected	unaffected
B0361.2	chrIII	7293567	7308300	0	unaffected	0	unaffected	unaffected
B0361.3	chrIII	7281339	7283892	0	unaffected	0	unaffected	unaffected
B0361.4	chrIII	7258948	7268422	0	unaffected	0	unaffected	unaffected
B0361.5	chrIII	7268350	7275334	0	unaffected	0	unaffected	unaffected
B0361.6	chrIII	7275440	7277210	0	unaffected	0	unaffected	unaffected
B0361.7	chrIII	7283856	7285819	0	unaffected	0	unaffected	unaffected
B0361.8	chrIII	7287782	7290500	0	unaffected	0	unaffected	unaffected
B0361.9	chrIII	7298283	7299579	0	unaffected	0	unaffected	unaffected
B0365.1	chrV	13116487	13120120	0	unaffected	0	unaffected	unaffected
B0365.3	chrV	13126391	13129982	0	unaffected	0	unaffected	unaffected
B0365.5	chrV	13131912	13134843	0	unaffected	0	unaffected	unaffected
B0365.6	chrV	13134925	13138071	0	unaffected	0	unaffected	unaffected
B0365.7	chrV	13138965	13150276	0	unaffected	0	unaffected	unaffected
B0379.1	chrI	10074957	10077739	0	unaffected	0	unaffected	unaffected
B0379.2	chrI	10070911	10071819	0	unaffected	0	unaffected	unaffected
B0379.3	chrI	10080140	10086280	0	unaffected	0	unaffected	unaffected
B0379.4	chrI	10086380	10102001	0	unaffected	0	unaffected	unaffected
B0379.7	chrI	10072570	10074376	0	unaffected	0	unaffected	unaffected
B0391.10	chrV	15585677	15592966	0	unaffected	0	unaffected	unaffected
B0391.11	chrV	15600340	15602326	0	unaffected	0	unaffected	unaffected
B0391.12	chrV	15613166	15614949	0	unaffected	0	unaffected	unaffected
B0391.4	chrV	15610870	15612572	0	unaffected	0	unaffected	unaffected
B0391.5	chrV	15605704	15610361	0	unaffected	0	unaffected	unaffected
B0391.6	chrV	15602895	15605136	0	unaffected	0	unaffected	unaffected
B0391.9	chrV	15593442	15593780	0	unaffected	0	unaffected	unaffected
B0393.1	chrIII	4752863	4754048	0	unaffected	0	unaffected	unaffected
B0393.2	chrIII	4754396	4756984	0	unaffected	0	unaffected	unaffected
B0393.3	chrIII	4757212	4759696	0	unaffected	0	unaffected	unaffected
B0393.4	chrIII	4759706	4763574	0	unaffected	0	unaffected	unaffected
B0393.5	chrIII	4765782	4776242	0	unaffected	0	unaffected	unaffected
B0393.6	chrIII	4780123	4781946	0	unaffected	0	unaffected	unaffected
B0393.7	chrIII	4776228	4778030	0	unaffected	0	unaffected	unaffected
B0393.8	chrIII	4751842	4752335	0	unaffected	0	unaffected	unaffected
B0393.9	chrIII	4778354	4780123	0	unaffected	0	unaffected	unaffected
B0395.1	chrX	16017446	16021677	0	unaffected	0	unaffected	unaffected
B0395.2	chrX	16030733	16034744	0	unaffected	0	unaffected	unaffected
B0395.3	chrX	16034974	16039442	0	unaffected	0	unaffected	unaffected
B0399.1	chrV	19565355	19606090	0	unaffected	0	unaffected	unaffected
B0399.2	chrV	19550985	19555842	0	unaffected	0	unaffected	unaffected
B0403.2	chrX	7050583	7055330	0	unaffected	0	unaffected	unaffected
B0403.3	chrX	7061804	7063286	0	unaffected	0	unaffected	unaffected
B0403.4	chrX	7066300	7068519	0	unaffected	0	unaffected	unaffected
B0403.5	chrX	7057763	7061638	0	unaffected	0	unaffected	unaffected
B0403.6	chrX	7071345	7075293	0	unaffected	0	unaffected	unaffected
B0410.2	chrX	2885858	2890593	0	unaffected	0	unaffected	unaffected
B0410.3	chrX	2890565	2891483	0	unaffected	0	unaffected	unaffected
B0412.1	chrIII	816239	821723	0	unaffected	0	unaffected	unaffected
B0412.2	chrIII	811821	813758	0	unaffected	0	unaffected	unaffected
B0412.3	chrIII	795130	809434	0	unaffected	0	unaffected	unaffected
B0412.4	chrIII	794288	795072	0	unaffected	0	unaffected	unaffected
B0414.1	chrI	5801874	5803269	0	unaffected	0	unaffected	unaffected
B0414.2	chrI	5776156	5788612	0	unaffected	0	unaffected	unaffected
B0414.3	chrI	5774587	5775613	0	unaffected	0	unaffected	unaffected
B0414.5	chrI	5788633	5791755	0	unaffected	0	unaffected	unaffected
B0414.6	chrI	5792326	5795124	0	unaffected	0	unaffected	unaffected
B0414.7	chrI	5795406	5801302	0	unaffected	0	unaffected	unaffected
B0414.8	chrI	5803961	5807294	0	unaffected	0	unaffected	unaffected
B0416.1	chrX	9303664	9310424	0	unaffected	0	unaffected	unaffected
B0416.3	chrX	9291591	9293587	0	unaffected	0	unaffected	unaffected
B0416.4	chrX	9278902	9279887	0	unaffected	0	unaffected	unaffected
B0416.5	chrX	9268572	9270794	0	unaffected	0	unaffected	unaffected
B0416.6	chrX	9293606	9296563	0	unaffected	0	unaffected	unaffected
B0416.7	chrX	9296885	9297891	0	unaffected	0	unaffected	unaffected
B0432.1	chrII	297398	299527	0	unaffected	0	unaffected	unaffected
B0432.10	chrII	283886	286275	0	unaffected	0	unaffected	unaffected
B0432.12	chrII	296274	297017	0	unaffected	0	unaffected	unaffected
B0432.13	chrII	276211	282576	0	unaffected	0	unaffected	unaffected
B0432.14	chrII	264352	265841	0	unaffected	0	unaffected	unaffected
B0432.2	chrII	290580	291861	0	unaffected	0	unaffected	unaffected
B0432.3	chrII	288936	290399	0	unaffected	0	unaffected	unaffected
B0432.4	chrII	286624	288850	0	unaffected	0	unaffected	unaffected
B0432.5	chrII	257818	261063	0	unaffected	0	unaffected	unaffected
B0432.6	chrII	266446	269280	0	unaffected	0	unaffected	unaffected
B0432.7	chrII	269389	273966	0	unaffected	0	unaffected	unaffected
B0432.8	chrII	276425	278738	0	unaffected	0	unaffected	unaffected
B0432.9	chrII	280555	283697	0	unaffected	0	unaffected	unaffected
B0454.7	chrII	3020563	3023434	0	unaffected	0	unaffected	unaffected
B0457.1	chrII	8896779	8908592	0	unaffected	0	unaffected	unaffected
B0457.2	chrII	8924509	8926517	0	unaffected	0	unaffected	unaffected
B0457.6	chrII	8922389	8924311	0	unaffected	0	unaffected	unaffected
B0462.1	chrV	18324993	18328763	0	unaffected	0	unaffected	unaffected
B0462.3	chrV	18318566	18319748	0	unaffected	0	unaffected	unaffected
B0462.4	chrV	18329083	18331151	0	unaffected	0	unaffected	unaffected
B0462.5	chrV	18322186	18323299	0	unaffected	0	unaffected	unaffected
B0464.1	chrIII	9489077	9491152	0	unaffected	0	unaffected	unaffected
B0464.2	chrIII	9491219	9497236	0	unaffected	0	unaffected	unaffected
B0464.3	chrIII	9488533	9489102	0	unaffected	0	unaffected	unaffected
B0464.4	chrIII	9469841	9485367	0	unaffected	0	unaffected	unaffected
B0464.5	chrIII	9456478	9462921	0	unaffected	0	unaffected	unaffected
B0464.6	chrIII	9462899	9465881	0	unaffected	0	unaffected	unaffected
B0464.7	chrIII	9467372	9467982	0	unaffected	0	unaffected	unaffected
B0464.8	chrIII	9468071	9470450	0	unaffected	0	unaffected	unaffected
B0464.9	chrIII	9465688	9467064	0	unaffected	0	unaffected	unaffected
B0478.1	chrIV	6957629	6963705	0	unaffected	0	unaffected	unaffected
B0478.3	chrIV	6963863	6964551	0	unaffected	0	unaffected	unaffected
B0491.1	chrII	11348365	11350312	0	unaffected	0	unaffected	unaffected
B0491.2	chrII	11336626	11337771	0	unaffected	0	unaffected	unaffected
B0491.3	chrII	11338385	11339535	0	unaffected	0	unaffected	unaffected
B0491.4	chrII	11340069	11343466	0	unaffected	0	unaffected	unaffected
B0491.5	chrII	11343651	11345679	0	unaffected	0	unaffected	unaffected
B0491.6	chrII	11345880	11347893	0	unaffected	0	unaffected	unaffected
B0491.7	chrII	11350125	11351311	0	unaffected	0	unaffected	unaffected
B0491.8	chrII	11358382	11370248	0	unaffected	0	unaffected	unaffected
B0495.1	chrII	7709735	7711391	0	unaffected	0	unaffected	unaffected
B0495.10	chrII	7711817	7718538	0	unaffected	0	unaffected	unaffected
B0495.2	chrII	7699200	7702251	0	unaffected	0	unaffected	unaffected
B0495.4	chrII	7690655	7693906	0	unaffected	0	unaffected	unaffected
B0495.5	chrII	7695882	7698454	0	unaffected	0	unaffected	unaffected
B0495.6	chrII	7698558	7699125	0	unaffected	0	unaffected	unaffected
B0495.7	chrII	7701894	7705182	0	unaffected	0	unaffected	unaffected
B0495.8	chrII	7705481	7707430	0	unaffected	0	unaffected	unaffected
B0495.9	chrII	7707528	7708663	0	unaffected	0	unaffected	unaffected
B0496.1	chrIV	7446378	7447452	0	unaffected	0	unaffected	unaffected
B0496.11	chrIV	7433536	7433947	0	unaffected	0	unaffected	unaffected
B0496.2	chrIV	7447844	7449363	0	unaffected	0	unaffected	unaffected
B0496.3	chrIV	7424484	7444651	0	unaffected	0	unaffected	unaffected
B0496.5	chrIV	7420946	7422660	0	unaffected	0	unaffected	unaffected
B0496.6	chrIV	7419140	7419960	0	unaffected	0	unaffected	unaffected
B0496.7	chrIV	7444622	7445354	0	unaffected	0	unaffected	unaffected
B0496.8	chrIV	7449072	7451434	0	unaffected	0	unaffected	unaffected
B0507.1	chrV	8776633	8779271	0	unaffected	0	unaffected	unaffected
B0507.10	chrV	8758797	8760494	0	unaffected	0	unaffected	unaffected
B0507.11	chrV	8771876	8773759	0	unaffected	0	unaffected	unaffected
B0507.2	chrV	8774309	8776494	0	unaffected	0	unaffected	unaffected
B0507.3	chrV	8768886	8770854	0	unaffected	0	unaffected	unaffected
B0507.6	chrV	8746135	8753044	0	unaffected	0	unaffected	unaffected
B0507.7	chrV	8756467	8758698	0	unaffected	0	unaffected	unaffected
B0507.8	chrV	8760664	8763172	0	unaffected	0	unaffected	unaffected
B0507.9	chrV	8764865	8766016	0	unaffected	0	unaffected	unaffected
B0511.1	chrI	10667943	10671005	0	unaffected	0	unaffected	unaffected
B0511.10	chrI	10640381	10642272	0	unaffected	0	unaffected	unaffected
B0511.11	chrI	10648589	10654168	0	unaffected	0	unaffected	unaffected
B0511.12	chrI	10654286	10661591	0	unaffected	0	unaffected	unaffected
B0511.13	chrI	10633178	10636006	0	unaffected	0	unaffected	unaffected
B0511.14	chrI	10662515	10666866	0	unaffected	0	unaffected	unaffected
B0511.2	chrI	10651018	10652951	0	unaffected	0	unaffected	unaffected
B0511.3	chrI	10646750	10647766	0	unaffected	0	unaffected	unaffected
B0511.4	chrI	10644272	10645606	0	unaffected	0	unaffected	unaffected
B0511.5	chrI	10628731	10631662	0	unaffected	0	unaffected	unaffected
B0511.7	chrI	10631639	10633141	0	unaffected	0	unaffected	unaffected
B0511.8	chrI	10636681	10638966	0	unaffected	0	unaffected	unaffected
B0511.9	chrI	10639074	10640219	0	unaffected	0	unaffected	unaffected
B0513.1	chrIV	13888063	13893956	0	unaffected	0	unaffected	unaffected
B0513.2	chrIV	13882706	13884152	0	unaffected	0	unaffected	unaffected
B0513.3	chrIV	13882168	13882638	0	unaffected	0	unaffected	unaffected
B0513.4	chrIV	13880112	13881517	0	unaffected	0	unaffected	unaffected
B0513.5	chrIV	13868528	13876592	0	unaffected	0	unaffected	unaffected
B0513.6	chrIV	13854329	13857326	0	unaffected	0	unaffected	unaffected
B0513.9	chrIV	13860118	13865269	0	unaffected	0	unaffected	unaffected
B0523.1	chrIII	8671622	8673545	0	unaffected	0	unaffected	unaffected
B0523.3	chrIII	8670463	8674970	0	unaffected	0	unaffected	unaffected
B0523.5	chrIII	8675216	8683612	0	unaffected	0	unaffected	unaffected
B0524.2	chrIII	1894092	1899847	0	unaffected	0	unaffected	unaffected
B0524.3	chrIII	1887548	1889682	0	unaffected	0	unaffected	unaffected
B0524.4	chrIII	1883597	1886209	0	unaffected	0	unaffected	unaffected
B0524.5	chrIII	1891373	1893833	0	unaffected	0	unaffected	unaffected
B0524.6	chrIII	1902183	1905631	0	unaffected	0	unaffected	unaffected
B0545.1	chrIV	92015	110924	0	unaffected	0	unaffected	unaffected
B0545.3	chrIV	86874	90082	0	unaffected	0	unaffected	unaffected
B0545.4	chrIV	109053	109943	0	unaffected	0	unaffected	unaffected
B0546.1	chrIV	3385634	3386904	0	unaffected	0	unaffected	unaffected
B0546.2	chrIV	3373390	3378129	0	unaffected	0	unaffected	unaffected
B0546.3	chrIV	3378787	3382831	0	unaffected	0	unaffected	unaffected
B0546.4	chrIV	3382944	3384144	0	unaffected	0	unaffected	unaffected
B0547.1	chrIV	5649519	5651070	0	unaffected	0	unaffected	unaffected
B0547.4	chrIV	5643240	5645603	0	unaffected	0	unaffected	unaffected
B0554.1	chrV	438401	438675	0	unaffected	0	unaffected	unaffected
B0554.2	chrV	434768	436727	0	unaffected	0	unaffected	unaffected
B0554.4	chrV	430612	433575	0	unaffected	0	unaffected	unaffected
B0554.5	chrV	424440	426561	0	unaffected	0	unaffected	unaffected
B0554.6	chrV	422498	424167	0	unaffected	0	unaffected	unaffected
B0554.7	chrV	437576	441024	0	unaffected	0	unaffected	unaffected
B0563.1	chrX	9171504	9172147	0	unaffected	0	unaffected	unaffected
B0563.10	chrX	9166690	9167199	0	unaffected	0	unaffected	unaffected
B0563.2	chrX	9163106	9165912	0	unaffected	0	unaffected	unaffected
B0563.4	chrX	9150634	9160597	0	unaffected	0	unaffected	unaffected
B0563.5	chrX	9146058	9147498	0	unaffected	0	unaffected	unaffected
B0563.6	chrX	9137869	9145538	0	unaffected	0	unaffected	unaffected
B0563.7	chrX	9152377	9154127	0	unaffected	0	unaffected	unaffected
B0563.8	chrX	9173627	9174433	0	unaffected	0	unaffected	unaffected
B0564.1	chrIV	13098953	13100592	0	unaffected	0	unaffected	unaffected
B0564.10	chrIV	13119071	13124363	0	unaffected	0	unaffected	unaffected
B0564.11	chrIV	13105298	13106902	0	unaffected	0	unaffected	unaffected
B0564.2	chrIV	13107632	13111479	0	unaffected	0	unaffected	unaffected
B0564.3	chrIV	13108115	13109775	0	unaffected	0	unaffected	unaffected
B0564.4	chrIV	13111495	13113058	0	unaffected	0	unaffected	unaffected
B0564.7	chrIV	13100688	13104855	0	unaffected	0	unaffected	unaffected
B0564.9	chrIV	13135219	13138798	0	unaffected	0	unaffected	unaffected
BE0003N10.1	chrIII	1037498	1046264	0	unaffected	0	unaffected	unaffected
BE0003N10.2	chrIII	1031303	1037202	0	unaffected	0	unaffected	unaffected
BE0003N10.3	chrIII	1046237	1060000	0	unaffected	0	unaffected	unaffected
BE10.1	chrIII	12787577	12789376	0	unaffected	0	unaffected	unaffected
BE10.2	chrIII	12793282	12798056	0	unaffected	0	unaffected	unaffected
BE10.3	chrIII	12807989	12811549	0	unaffected	0	unaffected	unaffected
BE10.4	chrIII	12813413	12816697	0	unaffected	0	unaffected	unaffected
BE10.5	chrIII	12806108	12806754	0	unaffected	0	unaffected	unaffected
C01A2.1	chrI	13408785	13411440	0	unaffected	0	unaffected	unaffected
C01A2.2	chrI	13397256	13398517	0	unaffected	0	unaffected	unaffected
C01A2.3	chrI	13387805	13391439	0	unaffected	0	unaffected	unaffected
C01A2.4	chrI	13392104	13393990	0	unaffected	0	unaffected	unaffected
C01A2.5	chrI	13384740	13387073	0	unaffected	0	unaffected	unaffected
C01A2.6	chrI	13379905	13384360	0	unaffected	0	unaffected	unaffected
C01A2.7	chrI	13402435	13404088	0	unaffected	0	unaffected	unaffected
C01A2.9	chrI	13376864	13377338	0	unaffected	0	unaffected	unaffected
C01B10.10	chrIV	6624359	6627981	0	unaffected	0	unaffected	unaffected
C01B10.11	chrIV	6657967	6660425	0	unaffected	0	unaffected	unaffected
C01B10.3	chrIV	6619031	6621341	0	unaffected	0	unaffected	unaffected
C01B10.4	chrIV	6628341	6631734	0	unaffected	0	unaffected	unaffected
C01B10.44	chrIV	6623678	6624482	0	unaffected	0	unaffected	unaffected
C01B10.5	chrIV	6646022	6646928	0	unaffected	0	unaffected	unaffected
C01B10.6	chrIV	6640149	6645341	0	unaffected	0	unaffected	unaffected
C01B10.8	chrIV	6635027	6638147	0	unaffected	0	unaffected	unaffected
C01B10.9	chrIV	6632210	6634987	0	unaffected	0	unaffected	unaffected
C01B12.1	chrII	23327	24457	0	unaffected	0	unaffected	unaffected
C01B12.2	chrII	19537	22170	0	unaffected	0	unaffected	unaffected
C01B12.3	chrII	12984	16001	0	unaffected	0	unaffected	unaffected
C01B12.4	chrII	6663	9233	0	unaffected	0	unaffected	unaffected
C01B12.5	chrII	9807	11846	0	unaffected	0	unaffected	unaffected
C01B12.8	chrII	23880	25435	0	unaffected	0	unaffected	unaffected
C01B7.1	chrV	8786528	8792753	0	unaffected	0	unaffected	unaffected
C01B7.3	chrV	8783399	8784143	0	unaffected	0	unaffected	unaffected
C01B7.4	chrV	8792673	8795545	0	unaffected	0	unaffected	unaffected
C01B7.5	chrV	8800128	8800974	0	unaffected	0	unaffected	unaffected
C01B7.6	chrV	8805393	8819933	0	unaffected	0	unaffected	unaffected
C01B9.1	chrII	13771505	13778956	0	unaffected	0	unaffected	unaffected
C01B9.4	chrII	13770769	13783947	0	unaffected	0	unaffected	unaffected
C01C10.1	chrX	7431424	7433490	0	unaffected	0	unaffected	unaffected
C01C10.2	chrX	7435751	7437936	0	unaffected	0	unaffected	unaffected
C01C10.3	chrX	7439353	7442534	0	unaffected	0	unaffected	unaffected
C01C10.4	chrX	7433586	7435662	0	unaffected	0	unaffected	unaffected
C01C4.1	chrX	3727559	3728424	0	unaffected	0	unaffected	unaffected
C01C4.2	chrX	3716300	3718629	0	unaffected	0	unaffected	unaffected
C01C4.3	chrX	3706728	3713318	0	unaffected	0	unaffected	unaffected
C01C7.1	chrIV	12622060	12630999	0	unaffected	0	unaffected	unaffected
C01F1.1	chrII	4301608	4305289	0	unaffected	0	unaffected	unaffected
C01F1.2	chrII	4299659	4301276	0	unaffected	0	unaffected	unaffected
C01F1.3	chrII	4295102	4299213	0	unaffected	0	unaffected	unaffected
C01F1.4	chrII	4276215	4279270	0	unaffected	0	unaffected	unaffected
C01F1.5	chrII	4279790	4281830	0	unaffected	0	unaffected	unaffected
C01F1.6	chrII	4282220	4288212	0	unaffected	0	unaffected	unaffected
C01F4.2	chrI	4850682	4867826	0	unaffected	0	unaffected	unaffected
C01F6.1	chrIV	9096824	9099472	0	unaffected	0	unaffected	unaffected
C01F6.2	chrIV	9099247	9101570	0	unaffected	0	unaffected	unaffected
C01F6.4	chrIV	9104950	9107594	0	unaffected	0	unaffected	unaffected
C01F6.5	chrIV	9108915	9109736	0	unaffected	0	unaffected	unaffected
C01F6.6	chrIV	9119081	9130369	0	unaffected	0	unaffected	unaffected
C01F6.8	chrIV	9094531	9095640	0	unaffected	0	unaffected	unaffected
C01F6.9	chrIV	9095738	9096218	0	unaffected	0	unaffected	unaffected
C01G10.1	chrV	15099729	15104787	0	unaffected	0	unaffected	unaffected
C01G10.10	chrV	15079863	15082462	0	unaffected	0	unaffected	unaffected
C01G10.11	chrV	15071506	15080135	0	unaffected	0	unaffected	unaffected
C01G10.12	chrV	15068672	15069490	0	unaffected	0	unaffected	unaffected
C01G10.14	chrV	15105358	15105910	0	unaffected	0	unaffected	unaffected
C01G10.15	chrV	15086933	15087279	0	unaffected	0	unaffected	unaffected
C01G10.16	chrV	15092948	15094321	0	unaffected	0	unaffected	unaffected
C01G10.17	chrV	15090739	15091102	0	unaffected	0	unaffected	unaffected
C01G10.2	chrV	15097656	15099537	0	unaffected	0	unaffected	unaffected
C01G10.3	chrV	15095031	15097435	0	unaffected	0	unaffected	unaffected
C01G10.4	chrV	15089737	15090004	0	unaffected	0	unaffected	unaffected
C01G10.5	chrV	15089084	15089482	0	unaffected	0	unaffected	unaffected
C01G10.6	chrV	15087638	15088319	0	unaffected	0	unaffected	unaffected
C01G10.7	chrV	15085729	15087047	0	unaffected	0	unaffected	unaffected
C01G10.8	chrV	15084040	15085368	0	unaffected	0	unaffected	unaffected
C01G10.9	chrV	15082746	15084074	0	unaffected	0	unaffected	unaffected
C01G12.1	chrII	14573539	14576487	0	unaffected	0	unaffected	unaffected
C01G12.10	chrII	14580255	14580968	0	unaffected	0	unaffected	unaffected
C01G12.11	chrII	14580817	14581202	0	unaffected	0	unaffected	unaffected
C01G12.13	chrII	14576881	14578000	0	unaffected	0	unaffected	unaffected
C01G12.2	chrII	14578209	14578522	0	unaffected	0	unaffected	unaffected
C01G12.3	chrII	14581389	14582285	0	unaffected	0	unaffected	unaffected
C01G12.5	chrII	14586451	14587432	0	unaffected	0	unaffected	unaffected
C01G12.6	chrII	14587881	14588186	0	unaffected	0	unaffected	unaffected
C01G12.7	chrII	14588545	14591818	0	unaffected	0	unaffected	unaffected
C01G12.8	chrII	14593448	14597565	0	unaffected	0	unaffected	unaffected
C01G12.9	chrII	14578943	14580023	0	unaffected	0	unaffected	unaffected
C01G5.2	chrIV	6526712	6529791	0	unaffected	0	unaffected	unaffected
C01G5.3	chrIV	6536167	6538989	0	unaffected	0	unaffected	unaffected
C01G5.4	chrIV	6531738	6535666	0	unaffected	0	unaffected	unaffected
C01G5.5	chrIV	6524596	6526485	0	unaffected	0	unaffected	unaffected
C01G5.6	chrIV	6522862	6524557	0	unaffected	0	unaffected	unaffected
C01G5.7	chrIV	6518162	6519023	0	unaffected	0	unaffected	unaffected
C01G5.8	chrIV	6548839	6552556	0	unaffected	0	unaffected	unaffected
C01G5.9	chrIV	6519963	6522292	0	unaffected	0	unaffected	unaffected
C01G6.1	chrII	9258852	9261934	0	unaffected	0	unaffected	unaffected
C01G6.2	chrII	9267275	9268243	0	unaffected	0	unaffected	unaffected
C01G6.3	chrII	9269831	9271475	0	unaffected	0	unaffected	unaffected
C01G6.4	chrII	9271201	9272984	0	unaffected	0	unaffected	unaffected
C01G6.5	chrII	9274848	9280038	0	unaffected	0	unaffected	unaffected
C01G6.6	chrII	9285633	9289076	0	unaffected	0	unaffected	unaffected
C01G6.7	chrII	9291956	9293981	0	unaffected	0	unaffected	unaffected
C01G6.8	chrII	9295855	9310242	0	unaffected	0	unaffected	unaffected
C01G6.9	chrII	9293976	9295693	0	unaffected	0	unaffected	unaffected
C01G8.1	chrI	5272848	5274325	0	unaffected	0	unaffected	unaffected
C01G8.2	chrI	5274698	5278711	0	unaffected	0	unaffected	unaffected
C01G8.3	chrI	5278806	5281519	0	unaffected	0	unaffected	unaffected
C01G8.4	chrI	5282085	5283944	0	unaffected	0	unaffected	unaffected
C01G8.5	chrI	5284059	5291608	0	unaffected	0	unaffected	unaffected
C01G8.6	chrI	5298757	5300334	0	unaffected	0	unaffected	unaffected
C01G8.9	chrI	5300953	5310917	0	unaffected	0	unaffected	unaffected
C01H6.1	chrI	7202180	7203506	0	unaffected	0	unaffected	unaffected
C01H6.2	chrI	7204542	7207715	0	unaffected	0	unaffected	unaffected
C01H6.3	chrI	7208024	7209864	0	unaffected	0	unaffected	unaffected
C01H6.4	chrI	7210540	7212697	0	unaffected	0	unaffected	unaffected
C01H6.5	chrI	7214742	7221804	0	unaffected	0	unaffected	unaffected
C01H6.6	chrI	7222048	7224133	0	unaffected	0	unaffected	unaffected
C01H6.7	chrI	7224653	7227763	0	unaffected	0	unaffected	unaffected
C01H6.8	chrI	7227861	7229433	0	unaffected	0	unaffected	unaffected
C01H6.9	chrI	7229415	7233118	0	unaffected	0	unaffected	unaffected
C02A12.1	chrV	3467449	3468498	0	unaffected	0	unaffected	unaffected
C02A12.10	chrV	3483087	3484778	0	unaffected	0	unaffected	unaffected
C02A12.4	chrV	3481415	3482599	0	unaffected	0	unaffected	unaffected
C02A12.5	chrV	3485545	3486954	0	unaffected	0	unaffected	unaffected
C02A12.8	chrV	3471866	3475118	0	unaffected	0	unaffected	unaffected
C02B10.1	chrIV	5086324	5088870	0	unaffected	0	unaffected	unaffected
C02B10.2	chrIV	5090281	5091101	0	unaffected	0	unaffected	unaffected
C02B10.3	chrIV	5092799	5103273	0	unaffected	0	unaffected	unaffected
C02B10.4	chrIV	5091575	5092800	0	unaffected	0	unaffected	unaffected
C02B10.5	chrIV	5083294	5086879	0	unaffected	0	unaffected	unaffected
C02B4.1	chrX	12678759	12689207	0	unaffected	0	unaffected	unaffected
C02B4.2	chrX	12663723	12667782	0	unaffected	0	unaffected	unaffected
C02B4.4	chrX	12662402	12663553	0	unaffected	0	unaffected	unaffected
C02B8.1	chrX	8147660	8148539	0	unaffected	0	unaffected	unaffected
C02B8.2	chrX	8144383	8144978	0	unaffected	0	unaffected	unaffected
C02B8.3	chrX	8139472	8140184	0	unaffected	0	unaffected	unaffected
C02B8.4	chrX	8116586	8120057	0	unaffected	0	unaffected	unaffected
C02B8.5	chrX	8120360	8125707	0	unaffected	0	unaffected	unaffected
C02B8.6	chrX	8133099	8136279	0	unaffected	0	unaffected	unaffected
C02C2.1	chrIII	7873714	7877041	0	unaffected	0	unaffected	unaffected
C02C2.3	chrIII	7866442	7868661	0	unaffected	0	unaffected	unaffected
C02C2.4	chrIII	7862512	7865222	0	unaffected	0	unaffected	unaffected
C02C2.5	chrIII	7877146	7878774	0	unaffected	0	unaffected	unaffected
C02C6.1	chrX	15568847	15573627	0	unaffected	0	unaffected	unaffected
C02C6.2	chrX	15537593	15546646	0	unaffected	0	unaffected	unaffected
C02C6.3	chrX	15546638	15552165	0	unaffected	0	unaffected	unaffected
C02D4.1	chrX	15284137	15286158	0	unaffected	0	unaffected	unaffected
C02D4.2	chrX	15286509	15302894	0	unaffected	0	unaffected	unaffected
C02D5.1	chrIII	8561104	8562892	0	unaffected	0	unaffected	unaffected
C02D5.2	chrIII	8557254	8559114	0	unaffected	0	unaffected	unaffected
C02D5.3	chrIII	8554691	8555741	0	unaffected	0	unaffected	unaffected
C02D5.4	chrIII	8552472	8553757	0	unaffected	0	unaffected	unaffected
C02E11.1	chrV	1042692	1048583	0	unaffected	0	unaffected	unaffected
C02E7.1	chrV	4934723	4939071	0	unaffected	0	unaffected	unaffected
C02E7.10	chrV	4930802	4933013	0	unaffected	0	unaffected	unaffected
C02E7.13	chrV	4943101	4944305	0	unaffected	0	unaffected	unaffected
C02E7.2	chrV	4926656	4928181	0	unaffected	0	unaffected	unaffected
C02E7.3	chrV	4924903	4926210	0	unaffected	0	unaffected	unaffected
C02E7.4	chrV	4923277	4924580	0	unaffected	0	unaffected	unaffected
C02E7.5	chrV	4921087	4922602	0	unaffected	0	unaffected	unaffected
C02E7.6	chrV	4919192	4919567	0	unaffected	0	unaffected	unaffected
C02E7.7	chrV	4918139	4918571	0	unaffected	0	unaffected	unaffected
C02F12.1	chrX	3681154	3684219	0	unaffected	0	unaffected	unaffected
C02F12.10	chrX	3672263	3673905	0	unaffected	0	unaffected	unaffected
C02F12.3	chrX	3668086	3668929	0	unaffected	0	unaffected	unaffected
C02F12.4	chrX	3674029	3678546	0	unaffected	0	unaffected	unaffected
C02F12.5	chrX	3670359	3672045	0	unaffected	0	unaffected	unaffected
C02F12.7	chrX	3684210	3689194	0	unaffected	0	unaffected	unaffected
C02F12.8	chrX	3690153	3693225	0	unaffected	0	unaffected	unaffected
C02F12.9	chrX	3696889	3700794	0	unaffected	0	unaffected	unaffected
C02F4.1	chrIV	10484089	10492932	0	unaffected	0	unaffected	unaffected
C02F4.2	chrIV	10492865	10501579	0	unaffected	0	unaffected	unaffected
C02F4.4	chrIV	10513869	10515263	0	unaffected	0	unaffected	unaffected
C02F5.1	chrIII	8250564	8254251	0	unaffected	0	unaffected	unaffected
C02F5.10	chrIII	8248613	8249410	0	unaffected	0	unaffected	unaffected
C02F5.11	chrIII	8236845	8237822	0	unaffected	0	unaffected	unaffected
C02F5.12	chrIII	8240806	8242932	0	unaffected	0	unaffected	unaffected
C02F5.13	chrIII	8247276	8248745	0	unaffected	0	unaffected	unaffected
C02F5.14	chrIII	8234451	8235458	0	unaffected	0	unaffected	unaffected
C02F5.2	chrIII	8249565	8250122	0	unaffected	0	unaffected	unaffected
C02F5.3	chrIII	8245817	8247188	0	unaffected	0	unaffected	unaffected
C02F5.4	chrIII	8244371	8245723	0	unaffected	0	unaffected	unaffected
C02F5.5	chrIII	8236074	8236835	0	unaffected	0	unaffected	unaffected
C02F5.6	chrIII	8232577	8234463	0	unaffected	0	unaffected	unaffected
C02F5.7	chrIII	8229653	8233595	0	unaffected	0	unaffected	unaffected
C02F5.8	chrIII	8237923	8239352	0	unaffected	0	unaffected	unaffected
C02F5.9	chrIII	8243047	8244023	0	unaffected	0	unaffected	unaffected
C02G6.1	chrV	5876352	5879925	0	unaffected	0	unaffected	unaffected
C02G6.2	chrV	5872066	5874897	0	unaffected	0	unaffected	unaffected
C02G6.3	chrV	5881093	5882433	0	unaffected	0	unaffected	unaffected
C02H6.1	chrV	7388370	7389852	0	unaffected	0	unaffected	unaffected
C02H6.2	chrV	7390507	7392068	0	unaffected	0	unaffected	unaffected
C02H7.1	chrX	763767	766732	0	unaffected	0	unaffected	unaffected
C02H7.2	chrX	731158	735671	0	unaffected	0	unaffected	unaffected
C02H7.3	chrX	751209	759731	0	unaffected	0	unaffected	unaffected
C03A3.1	chrX	11257295	11260160	0	unaffected	0	unaffected	unaffected
C03A3.2	chrX	11262780	11266258	0	unaffected	0	unaffected	unaffected
C03A3.3	chrX	11267325	11268966	0	unaffected	0	unaffected	unaffected
C03A7.10	chrV	5170897	5172917	0	unaffected	0	unaffected	unaffected
C03A7.11	chrV	5175009	5177240	0	unaffected	0	unaffected	unaffected
C03A7.12	chrV	5178319	5181440	0	unaffected	0	unaffected	unaffected
C03A7.13	chrV	5191113	5192515	0	unaffected	0	unaffected	unaffected
C03A7.14	chrV	5192976	5194592	0	unaffected	0	unaffected	unaffected
C03A7.2	chrV	5181895	5183701	0	unaffected	0	unaffected	unaffected
C03A7.4	chrV	5158607	5159882	0	unaffected	0	unaffected	unaffected
C03A7.5	chrV	5154041	5155501	0	unaffected	0	unaffected	unaffected
C03A7.7	chrV	5160586	5161877	0	unaffected	0	unaffected	unaffected
C03A7.8	chrV	5163379	5164743	0	unaffected	0	unaffected	unaffected
C03A7.9	chrV	5168258	5169670	0	unaffected	0	unaffected	unaffected
C03B1.1	chrX	6373611	6375555	0	unaffected	0	unaffected	unaffected
C03B1.10	chrX	6357710	6357919	0	unaffected	0	unaffected	unaffected
C03B1.12	chrX	6376400	6377651	0	unaffected	0	unaffected	unaffected
C03B1.13	chrX	6335238	6337787	0	unaffected	0	unaffected	unaffected
C03B1.14	chrX	6359371	6360724	0	unaffected	0	unaffected	unaffected
C03B1.2	chrX	6367577	6373121	0	unaffected	0	unaffected	unaffected
C03B1.3	chrX	6365976	6366795	0	unaffected	0	unaffected	unaffected
C03B1.4	chrX	6364459	6365681	0	unaffected	0	unaffected	unaffected
C03B1.5	chrX	6355548	6357745	0	unaffected	0	unaffected	unaffected
C03B1.6	chrX	6350150	6351840	0	unaffected	0	unaffected	unaffected
C03B1.7	chrX	6342119	6345993	0	unaffected	0	unaffected	unaffected
C03B8.2	chrIII	7715425	7716381	0	unaffected	0	unaffected	unaffected
C03B8.3	chrIII	7712265	7717253	0	unaffected	0	unaffected	unaffected
C03B8.4	chrIII	7700068	7709407	0	unaffected	0	unaffected	unaffected
C03C10.1	chrIII	4083977	4086618	0	unaffected	0	unaffected	unaffected
C03C10.2	chrIII	4091051	4093254	0	unaffected	0	unaffected	unaffected
C03C10.3	chrIII	4093279	4094899	0	unaffected	0	unaffected	unaffected
C03C10.4	chrIII	4096874	4098107	0	unaffected	0	unaffected	unaffected
C03C10.5	chrIII	4090265	4090532	0	unaffected	0	unaffected	unaffected
C03C10.7	chrIII	4096018	4097114	0	unaffected	0	unaffected	unaffected
C03C10.9	chrIII	4089777	4089912	0	unaffected	0	unaffected	unaffected
C03C11.1	chrI	10014720	10015487	0	unaffected	0	unaffected	unaffected
C03C11.2	chrI	10016767	10018105	0	unaffected	0	unaffected	unaffected
C03D6.1	chrI	9668469	9670706	0	unaffected	0	unaffected	unaffected
C03D6.3	chrI	9665245	9668655	0	unaffected	0	unaffected	unaffected
C03D6.4	chrI	9660165	9665135	0	unaffected	0	unaffected	unaffected
C03D6.5	chrI	9658264	9660064	0	unaffected	0	unaffected	unaffected
C03D6.6	chrI	9657048	9657841	0	unaffected	0	unaffected	unaffected
C03D6.8	chrI	9669403	9670132	0	unaffected	0	unaffected	unaffected
C03E10.3	chrV	11286959	11288208	0	unaffected	0	unaffected	unaffected
C03E10.4	chrV	11282551	11286024	0	unaffected	0	unaffected	unaffected
C03E10.5	chrV	11273129	11278141	0	unaffected	0	unaffected	unaffected
C03F11.1	chrX	5390697	5394108	0	unaffected	0	unaffected	unaffected
C03F11.2	chrX	5394530	5396896	0	unaffected	0	unaffected	unaffected
C03F11.3	chrX	5397643	5400552	0	unaffected	0	unaffected	unaffected
C03F11.4	chrX	5401452	5406411	0	unaffected	0	unaffected	unaffected
C03G5.1	chrX	8542813	8545974	0	unaffected	0	unaffected	unaffected
C03G5.13	chrX	8541092	8541443	0	unaffected	0	unaffected	unaffected
C03G5.2	chrX	8541811	8542231	0	unaffected	0	unaffected	unaffected
C03G5.7	chrX	8528196	8531023	0	unaffected	0	unaffected	unaffected
C03G5.8	chrX	8534616	8535053	0	unaffected	0	unaffected	unaffected
C03G6.10	chrV	7342169	7343818	0	unaffected	0	unaffected	unaffected
C03G6.12	chrV	7348192	7350049	0	unaffected	0	unaffected	unaffected
C03G6.13	chrV	7354457	7356766	0	unaffected	0	unaffected	unaffected
C03G6.15	chrV	7362297	7364186	0	unaffected	0	unaffected	unaffected
C03G6.17	chrV	7379735	7381066	0	unaffected	0	unaffected	unaffected
C03G6.18	chrV	7382002	7383291	0	unaffected	0	unaffected	unaffected
C03G6.19	chrV	7384213	7386288	0	unaffected	0	unaffected	unaffected
C03G6.3	chrV	7369741	7372113	0	unaffected	0	unaffected	unaffected
C03G6.5	chrV	7365224	7365906	0	unaffected	0	unaffected	unaffected
C03G6.6	chrV	7357419	7358864	0	unaffected	0	unaffected	unaffected
C03G6.8	chrV	7346671	7348117	0	unaffected	0	unaffected	unaffected
C03G6.9	chrV	7344042	7345216	0	unaffected	0	unaffected	unaffected
C03H12.1	chrX	15689389	15696355	0	unaffected	0	unaffected	unaffected
C03H5.1	chrII	402659	404235	0	unaffected	0	unaffected	unaffected
C03H5.2	chrII	388832	392737	0	unaffected	0	unaffected	unaffected
C03H5.3	chrII	386193	387920	0	unaffected	0	unaffected	unaffected
C03H5.4	chrII	375249	375835	0	unaffected	0	unaffected	unaffected
C03H5.5	chrII	382272	385354	0	unaffected	0	unaffected	unaffected
C03H5.6	chrII	392813	399976	0	unaffected	0	unaffected	unaffected
C03H5.7	chrII	380572	382344	0	unaffected	0	unaffected	unaffected
C04A11.1	chrX	13660448	13662893	0	unaffected	0	unaffected	unaffected
C04A11.2	chrX	13665886	13668742	0	unaffected	0	unaffected	unaffected
C04A11.3	chrX	13677121	13682008	0	unaffected	0	unaffected	unaffected
C04A11.4	chrX	13687902	13695721	0	unaffected	0	unaffected	unaffected
C04A11.5	chrX	13664516	13665310	0	unaffected	0	unaffected	unaffected
C04A2.1	chrII	6848016	6851484	0	unaffected	0	unaffected	unaffected
C04A2.3	chrII	6835037	6847865	0	unaffected	0	unaffected	unaffected
C04A2.7	chrII	6853420	6858255	0	unaffected	0	unaffected	unaffected
C04B4.1	chrX	12280638	12282491	0	unaffected	0	unaffected	unaffected
C04B4.2	chrX	12283232	12285246	0	unaffected	0	unaffected	unaffected
C04B4.4	chrX	12289910	12293199	0	unaffected	0	unaffected	unaffected
C04C11.1	chrX	14020716	14022340	0	unaffected	0	unaffected	unaffected
C04C11.2	chrX	14033724	14037384	0	unaffected	0	unaffected	unaffected
C04C3.1	chrIV	3428896	3430330	0	unaffected	0	unaffected	unaffected
C04C3.2	chrIV	3415679	3419231	0	unaffected	0	unaffected	unaffected
C04C3.3	chrIV	3399666	3403904	0	unaffected	0	unaffected	unaffected
C04C3.5	chrIV	3396577	3399120	0	unaffected	0	unaffected	unaffected
C04C3.6	chrIV	3419809	3422604	0	unaffected	0	unaffected	unaffected
C04C3.9	chrIV	3428084	3428531	0	unaffected	0	unaffected	unaffected
C04D8.1	chrIII	8494940	8518803	0	unaffected	0	unaffected	unaffected
C04E12.11	chrV	3386487	3388153	0	unaffected	0	unaffected	unaffected
C04E12.12	chrV	3389326	3390949	0	unaffected	0	unaffected	unaffected
C04E12.4	chrV	3362780	3368318	0	unaffected	0	unaffected	unaffected
C04E12.5	chrV	3358595	3361090	0	unaffected	0	unaffected	unaffected
C04E12.7	chrV	3355976	3357190	0	unaffected	0	unaffected	unaffected
C04E6.10	chrV	5904899	5906335	0	unaffected	0	unaffected	unaffected
C04E6.11	chrV	5914077	5917831	0	unaffected	0	unaffected	unaffected
C04E6.13	chrV	5912739	5913740	0	unaffected	0	unaffected	unaffected
C04E6.2	chrV	5922527	5924280	0	unaffected	0	unaffected	unaffected
C04E6.5	chrV	5902115	5904829	0	unaffected	0	unaffected	unaffected
C04E6.6	chrV	5895370	5898585	0	unaffected	0	unaffected	unaffected
C04E6.7	chrV	5893299	5895196	0	unaffected	0	unaffected	unaffected
C04E6.8	chrV	5882647	5883820	0	unaffected	0	unaffected	unaffected
C04E7.1	chrX	358091	360198	0	unaffected	0	unaffected	unaffected
C04E7.2	chrX	353619	357934	0	unaffected	0	unaffected	unaffected
C04E7.3	chrX	344126	346289	0	unaffected	0	unaffected	unaffected
C04E7.4	chrX	334309	341232	0	unaffected	0	unaffected	unaffected
C04E7.5	chrX	360778	362966	0	unaffected	0	unaffected	unaffected
C04F1.1	chrI	5726375	5729310	0	unaffected	0	unaffected	unaffected
C04F1.3	chrI	5716678	5725359	0	unaffected	0	unaffected	unaffected
C04F12.1	chrI	9673657	9678544	0	unaffected	0	unaffected	unaffected
C04F12.10	chrI	9711057	9712757	0	unaffected	0	unaffected	unaffected
C04F12.12	chrI	9694612	9695203	0	unaffected	0	unaffected	unaffected
C04F12.3	chrI	9685472	9688639	0	unaffected	0	unaffected	unaffected
C04F12.4	chrI	9689175	9690118	0	unaffected	0	unaffected	unaffected
C04F12.5	chrI	9690088	9690548	0	unaffected	0	unaffected	unaffected
C04F12.7	chrI	9695698	9696753	0	unaffected	0	unaffected	unaffected
C04F12.8	chrI	9697584	9699546	0	unaffected	0	unaffected	unaffected
C04F12.9	chrI	9710078	9710758	0	unaffected	0	unaffected	unaffected
C04F2.4	chrV	7501716	7504352	0	unaffected	0	unaffected	unaffected
C04F5.1	chrV	5119954	5126901	0	unaffected	0	unaffected	unaffected
C04F5.3	chrV	5094768	5098892	0	unaffected	0	unaffected	unaffected
C04F5.5	chrV	5103026	5105019	0	unaffected	0	unaffected	unaffected
C04F5.6	chrV	5105748	5107901	0	unaffected	0	unaffected	unaffected
C04F5.7	chrV	5107999	5110774	0	unaffected	0	unaffected	unaffected
C04F5.8	chrV	5111481	5113741	0	unaffected	0	unaffected	unaffected
C04F5.9	chrV	5114729	5119194	0	unaffected	0	unaffected	unaffected
C04F6.1	chrX	3403456	3408591	0	unaffected	0	unaffected	unaffected
C04F6.2	chrX	3397137	3397454	0	unaffected	0	unaffected	unaffected
C04F6.3	chrX	3397593	3400007	0	unaffected	0	unaffected	unaffected
C04F6.4	chrX	3408649	3411669	0	unaffected	0	unaffected	unaffected
C04F6.5	chrX	3412869	3414693	0	unaffected	0	unaffected	unaffected
C04F6.7	chrX	3416874	3419200	0	unaffected	0	unaffected	unaffected
C04G2.1	chrIV	10088345	10089868	0	unaffected	0	unaffected	unaffected
C04G2.10	chrIV	10115368	10118062	0	unaffected	0	unaffected	unaffected
C04G2.11	chrIV	10119437	10122367	0	unaffected	0	unaffected	unaffected
C04G2.2	chrIV	10090712	10092358	0	unaffected	0	unaffected	unaffected
C04G2.4	chrIV	10095378	10095830	0	unaffected	0	unaffected	unaffected
C04G2.5	chrIV	10094178	10095204	0	unaffected	0	unaffected	unaffected
C04G2.6	chrIV	10097186	10106535	0	unaffected	0	unaffected	unaffected
C04G2.7	chrIV	10107013	10110391	0	unaffected	0	unaffected	unaffected
C04G2.8	chrIV	10110325	10111556	0	unaffected	0	unaffected	unaffected
C04G2.9	chrIV	10112868	10114209	0	unaffected	0	unaffected	unaffected
C04G6.1	chrII	5104108	5108892	0	unaffected	0	unaffected	unaffected
C04G6.10	chrII	5101975	5102638	0	unaffected	0	unaffected	unaffected
C04G6.2	chrII	5093227	5094206	0	unaffected	0	unaffected	unaffected
C04G6.3	chrII	5083839	5091628	0	unaffected	0	unaffected	unaffected
C04G6.4	chrII	5081486	5083433	0	unaffected	0	unaffected	unaffected
C04G6.5	chrII	5085776	5086113	0	unaffected	0	unaffected	unaffected
C04G6.6	chrII	5099428	5100233	0	unaffected	0	unaffected	unaffected
C04G6.7	chrII	5100402	5101774	0	unaffected	0	unaffected	unaffected
C04H4.1	chrII	7958792	7960186	0	unaffected	0	unaffected	unaffected
C04H5.1	chrII	14534222	14535820	0	unaffected	0	unaffected	unaffected
C04H5.2	chrII	14535743	14537504	0	unaffected	0	unaffected	unaffected
C04H5.3	chrII	14540743	14548716	0	unaffected	0	unaffected	unaffected
C04H5.6	chrII	14552429	14561521	0	unaffected	0	unaffected	unaffected
C04H5.8	chrII	14550837	14552410	0	unaffected	0	unaffected	unaffected
C05A2.1	chrV	10702528	10704889	0	unaffected	0	unaffected	unaffected
C05A9.1	chrX	10854254	10859228	0	unaffected	0	unaffected	unaffected
C05A9.2	chrX	10842616	10844609	0	unaffected	0	unaffected	unaffected
C05B10.1	chrIV	6842952	6844955	0	unaffected	0	unaffected	unaffected
C05B5.1	chrIII	9987651	9988371	0	unaffected	0	unaffected	unaffected
C05B5.11	chrIII	10004375	10004875	0	unaffected	0	unaffected	unaffected
C05B5.2	chrIII	9998452	10000427	0	unaffected	0	unaffected	unaffected
C05B5.3	chrIII	9996121	9997831	0	unaffected	0	unaffected	unaffected
C05B5.4	chrIII	9993795	9996146	0	unaffected	0	unaffected	unaffected
C05B5.5	chrIII	10001285	10003024	0	unaffected	0	unaffected	unaffected
C05B5.6	chrIII	10007882	10010087	0	unaffected	0	unaffected	unaffected
C05B5.7	chrIII	10014502	10016444	0	unaffected	0	unaffected	unaffected
C05B5.8	chrIII	10005366	10006694	0	unaffected	0	unaffected	unaffected
C05C10.1	chrII	9918065	9920509	0	unaffected	0	unaffected	unaffected
C05C10.2	chrII	9922188	9930771	0	unaffected	0	unaffected	unaffected
C05C10.3	chrII	9934344	9936836	0	unaffected	0	unaffected	unaffected
C05C10.4	chrII	9931785	9934384	0	unaffected	0	unaffected	unaffected
C05C10.5	chrII	9939094	9940278	0	unaffected	0	unaffected	unaffected
C05C10.6	chrII	9940701	9943988	0	unaffected	0	unaffected	unaffected
C05C10.7	chrII	9938046	9938904	0	unaffected	0	unaffected	unaffected
C05C10.8	chrII	9917062	9917884	0	unaffected	0	unaffected	unaffected
C05C12.1	chrIV	11253962	11255698	0	unaffected	0	unaffected	unaffected
C05C12.3	chrIV	11248879	11259443	0	unaffected	0	unaffected	unaffected
C05C12.4	chrIV	11246425	11248030	0	unaffected	0	unaffected	unaffected
C05C12.5	chrIV	11260308	11261148	0	unaffected	0	unaffected	unaffected
C05C12.6	chrIV	11231647	11233101	0	unaffected	0	unaffected	unaffected
C05C8.1	chrV	7239750	7241348	0	unaffected	0	unaffected	unaffected
C05C8.2	chrV	7231162	7232731	0	unaffected	0	unaffected	unaffected
C05C8.3	chrV	7225350	7226296	0	unaffected	0	unaffected	unaffected
C05C8.4	chrV	7226356	7230830	0	unaffected	0	unaffected	unaffected
C05C8.5	chrV	7232654	7234810	0	unaffected	0	unaffected	unaffected
C05C8.6	chrV	7234905	7237112	0	unaffected	0	unaffected	unaffected
C05C8.7	chrV	7242888	7247279	0	unaffected	0	unaffected	unaffected
C05C8.8	chrV	7252306	7255139	0	unaffected	0	unaffected	unaffected
C05C8.9	chrV	7237374	7239644	0	unaffected	0	unaffected	unaffected
C05C9.1	chrX	11160914	11163620	0	unaffected	0	unaffected	unaffected
C05C9.2	chrX	11152998	11157577	0	unaffected	0	unaffected	unaffected
C05C9.3	chrX	11142904	11152754	0	unaffected	0	unaffected	unaffected
C05D10.1	chrIII	6080511	6084686	0	unaffected	0	unaffected	unaffected
C05D10.2	chrIII	6067805	6072030	0	unaffected	0	unaffected	unaffected
C05D10.3	chrIII	6084621	6087404	0	unaffected	0	unaffected	unaffected
C05D10.4	chrIII	6088633	6102810	0	unaffected	0	unaffected	unaffected
C05D11.1	chrIII	6436555	6439906	0	unaffected	0	unaffected	unaffected
C05D11.10	chrIII	6430984	6431740	0	unaffected	0	unaffected	unaffected
C05D11.11	chrIII	6440092	6442948	0	unaffected	0	unaffected	unaffected
C05D11.12	chrIII	6444639	6446891	0	unaffected	0	unaffected	unaffected
C05D11.13	chrIII	6442629	6443919	0	unaffected	0	unaffected	unaffected
C05D11.2	chrIII	6433184	6436448	0	unaffected	0	unaffected	unaffected
C05D11.3	chrIII	6432128	6433101	0	unaffected	0	unaffected	unaffected
C05D11.4	chrIII	6407075	6409981	0	unaffected	0	unaffected	unaffected
C05D11.5	chrIII	6409699	6411506	0	unaffected	0	unaffected	unaffected
C05D11.6	chrIII	6411526	6414940	0	unaffected	0	unaffected	unaffected
C05D11.7	chrIII	6415718	6421659	0	unaffected	0	unaffected	unaffected
C05D11.8	chrIII	6422405	6427252	0	unaffected	0	unaffected	unaffected
C05D11.9	chrIII	6427477	6430882	0	unaffected	0	unaffected	unaffected
C05D12.1	chrII	11411817	11415708	0	unaffected	0	unaffected	unaffected
C05D12.2	chrII	11418249	11423317	0	unaffected	0	unaffected	unaffected
C05D12.3	chrII	11424685	11430535	0	unaffected	0	unaffected	unaffected
C05D12.4	chrII	11429919	11432702	0	unaffected	0	unaffected	unaffected
C05D12.5	chrII	11434156	11434894	0	unaffected	0	unaffected	unaffected
C05D12.7	chrII	11410049	11411911	0	unaffected	0	unaffected	unaffected
C05D2.1	chrIII	5624971	5632447	0	unaffected	0	unaffected	unaffected
C05D2.10	chrIII	5597913	5600018	0	unaffected	0	unaffected	unaffected
C05D2.3	chrIII	5614929	5617230	0	unaffected	0	unaffected	unaffected
C05D2.4	chrIII	5612231	5614637	0	unaffected	0	unaffected	unaffected
C05D2.5	chrIII	5604416	5607511	0	unaffected	0	unaffected	unaffected
C05D2.6	chrIII	5600339	5603722	0	unaffected	0	unaffected	unaffected
C05D2.8	chrIII	5607465	5610304	0	unaffected	0	unaffected	unaffected
C05D9.1	chrX	1128980	1132922	0	unaffected	0	unaffected	unaffected
C05D9.2	chrX	1125166	1128285	0	unaffected	0	unaffected	unaffected
C05D9.3	chrX	1111899	1116791	0	unaffected	0	unaffected	unaffected
C05D9.4	chrX	1108063	1108413	0	unaffected	0	unaffected	unaffected
C05D9.5	chrX	1104208	1106244	0	unaffected	0	unaffected	unaffected
C05D9.7	chrX	1117193	1119404	0	unaffected	0	unaffected	unaffected
C05D9.9	chrX	1122417	1124231	0	unaffected	0	unaffected	unaffected
C05E11.1	chrX	4588738	4590420	0	unaffected	0	unaffected	unaffected
C05E11.2	chrX	4586889	4587966	0	unaffected	0	unaffected	unaffected
C05E11.3	chrX	4579479	4581630	0	unaffected	0	unaffected	unaffected
C05E11.4	chrX	4571421	4573888	0	unaffected	0	unaffected	unaffected
C05E11.5	chrX	4565275	4569534	0	unaffected	0	unaffected	unaffected
C05E11.6	chrX	4562168	4562811	0	unaffected	0	unaffected	unaffected
C05E11.7	chrX	4581570	4585638	0	unaffected	0	unaffected	unaffected
C05E11.8	chrX	4591253	4592477	0	unaffected	0	unaffected	unaffected
C05E4.1	chrV	762734	764658	0	unaffected	0	unaffected	unaffected
C05E4.10	chrV	734420	736272	0	unaffected	0	unaffected	unaffected
C05E4.11	chrV	736803	738871	0	unaffected	0	unaffected	unaffected
C05E4.12	chrV	758039	761979	0	unaffected	0	unaffected	unaffected
C05E4.13	chrV	751326	752780	0	unaffected	0	unaffected	unaffected
C05E4.14	chrV	728309	734280	0	unaffected	0	unaffected	unaffected
C05E4.3	chrV	753334	755049	0	unaffected	0	unaffected	unaffected
C05E4.6	chrV	743648	745476	0	unaffected	0	unaffected	unaffected
C05E4.7	chrV	742120	743274	0	unaffected	0	unaffected	unaffected
C05E4.9	chrV	724207	728104	0	unaffected	0	unaffected	unaffected
C05E7.1	chrX	12941370	12943477	0	unaffected	0	unaffected	unaffected
C05E7.2	chrX	12938626	12940641	0	unaffected	0	unaffected	unaffected
C05E7.3	chrX	12945545	12946492	0	unaffected	0	unaffected	unaffected
C05E7.4	chrX	12965414	12968386	0	unaffected	0	unaffected	unaffected
C05G5.1	chrX	14734376	14740019	0	unaffected	0	unaffected	unaffected
C05G5.2	chrX	14747250	14750321	0	unaffected	0	unaffected	unaffected
C05G5.3	chrX	14750787	14751942	0	unaffected	0	unaffected	unaffected
C05G5.4	chrX	14753954	14756390	0	unaffected	0	unaffected	unaffected
C05G5.5	chrX	14756005	14760894	0	unaffected	0	unaffected	unaffected
C05G5.7	chrX	14743600	14743711	0	unaffected	0	unaffected	unaffected
C05G6.1	chrIV	627536	633965	0	unaffected	0	unaffected	unaffected
C05H8.1	chrIII	5635436	5654514	0	unaffected	0	unaffected	unaffected
C06A1.1	chrII	10559957	10563349	0	unaffected	0	unaffected	unaffected
C06A1.2	chrII	10568844	10572056	0	unaffected	0	unaffected	unaffected
C06A1.3	chrII	10572203	10574011	0	unaffected	0	unaffected	unaffected
C06A1.5	chrII	10579306	10580552	0	unaffected	0	unaffected	unaffected
C06A12.3	chrIV	17427679	17429566	0	unaffected	0	unaffected	unaffected
C06A12.4	chrIV	17432939	17440054	0	unaffected	0	unaffected	unaffected
C06A12.5	chrIV	17429718	17431931	0	unaffected	0	unaffected	unaffected
C06A5.1	chrI	6012059	6021985	0	unaffected	0	unaffected	unaffected
C06A5.10	chrI	5982520	5982971	0	unaffected	0	unaffected	unaffected
C06A5.11	chrI	5991072	5993213	0	unaffected	0	unaffected	unaffected
C06A5.12	chrI	6004654	6007597	0	unaffected	0	unaffected	unaffected
C06A5.2	chrI	6006334	6007326	0	unaffected	0	unaffected	unaffected
C06A5.3	chrI	5986493	5990843	0	unaffected	0	unaffected	unaffected
C06A5.4	chrI	5980792	5981590	0	unaffected	0	unaffected	unaffected
C06A5.5	chrI	5981817	5982454	0	unaffected	0	unaffected	unaffected
C06A5.6	chrI	5978691	5985873	0	unaffected	0	unaffected	unaffected
C06A5.7	chrI	5992664	6001101	0	unaffected	0	unaffected	unaffected
C06A5.8	chrI	6008079	6009608	0	unaffected	0	unaffected	unaffected
C06A5.9	chrI	6009782	6011525	0	unaffected	0	unaffected	unaffected
C06A6.2	chrIV	7846629	7854550	0	unaffected	0	unaffected	unaffected
C06A6.3	chrIV	7830549	7832428	0	unaffected	0	unaffected	unaffected
C06A6.4	chrIV	7826315	7829289	0	unaffected	0	unaffected	unaffected
C06A6.5	chrIV	7832330	7834663	0	unaffected	0	unaffected	unaffected
C06A6.7	chrIV	7837360	7837973	0	unaffected	0	unaffected	unaffected
C06A8.1	chrII	7773827	7777780	0	unaffected	0	unaffected	unaffected
C06A8.2	chrII	7779289	7781202	0	unaffected	0	unaffected	unaffected
C06A8.3	chrII	7790507	7791517	0	unaffected	0	unaffected	unaffected
C06A8.4	chrII	7783764	7784595	0	unaffected	0	unaffected	unaffected
C06A8.5	chrII	7781526	7783296	0	unaffected	0	unaffected	unaffected
C06A8.6	chrII	7772514	7773860	0	unaffected	0	unaffected	unaffected
C06A8.7	chrII	7763884	7765464	0	unaffected	0	unaffected	unaffected
C06A8.8	chrII	7765309	7771965	0	unaffected	0	unaffected	unaffected
C06A8.9	chrII	7785021	7794267	0	unaffected	0	unaffected	unaffected
C06B3.12	chrV	13924136	13925793	0	unaffected	0	unaffected	unaffected
C06B3.2	chrV	13899498	13902639	0	unaffected	0	unaffected	unaffected
C06B3.3	chrV	13896642	13898474	0	unaffected	0	unaffected	unaffected
C06B3.4	chrV	13906475	13908023	0	unaffected	0	unaffected	unaffected
C06B3.5	chrV	13904596	13905982	0	unaffected	0	unaffected	unaffected
C06B3.6	chrV	13908113	13909499	0	unaffected	0	unaffected	unaffected
C06B3.7	chrV	13909733	13911510	0	unaffected	0	unaffected	unaffected
C06B3.8	chrV	13912065	13915422	0	unaffected	0	unaffected	unaffected
C06B8.1	chrV	15479525	15481659	0	unaffected	0	unaffected	unaffected
C06B8.2	chrV	15476045	15478548	0	unaffected	0	unaffected	unaffected
C06B8.6	chrV	15496250	15497549	0	unaffected	0	unaffected	unaffected
C06B8.7	chrV	15498724	15511403	0	unaffected	0	unaffected	unaffected
C06B8.8	chrV	15512147	15512755	0	unaffected	0	unaffected	unaffected
C06C3.1	chrII	9358471	9369040	0	unaffected	0	unaffected	unaffected
C06C3.10	chrII	9375799	9377150	0	unaffected	0	unaffected	unaffected
C06C3.12	chrII	9375047	9375789	0	unaffected	0	unaffected	unaffected
C06C3.3	chrII	9369118	9372312	0	unaffected	0	unaffected	unaffected
C06C3.4	chrII	9373231	9374795	0	unaffected	0	unaffected	unaffected
C06C3.6	chrII	9383318	9384936	0	unaffected	0	unaffected	unaffected
C06C3.7	chrII	9385479	9386478	0	unaffected	0	unaffected	unaffected
C06C3.8	chrII	9386524	9390841	0	unaffected	0	unaffected	unaffected
C06C3.9	chrII	9376395	9378223	0	unaffected	0	unaffected	unaffected
C06C6.1	chrV	16010689	16012092	0	unaffected	0	unaffected	unaffected
C06C6.2	chrV	16008311	16009644	0	unaffected	0	unaffected	unaffected
C06C6.3	chrV	16006283	16007585	0	unaffected	0	unaffected	unaffected
C06C6.4	chrV	16002574	16004708	0	unaffected	0	unaffected	unaffected
C06C6.5	chrV	15997758	16000633	0	unaffected	0	unaffected	unaffected
C06C6.6	chrV	15988733	15991587	0	unaffected	0	unaffected	unaffected
C06C6.7	chrV	15992185	15995587	0	unaffected	0	unaffected	unaffected
C06C6.8	chrV	15997115	15997750	0	unaffected	0	unaffected	unaffected
C06C6.9	chrV	15996193	15996725	0	unaffected	0	unaffected	unaffected
C06E1.1	chrIII	8605751	8606424	0	unaffected	0	unaffected	unaffected
C06E1.10	chrIII	8609796	8614489	0	unaffected	0	unaffected	unaffected
C06E1.11	chrIII	8614681	8616244	0	unaffected	0	unaffected	unaffected
C06E1.3	chrIII	8581021	8583849	0	unaffected	0	unaffected	unaffected
C06E1.4	chrIII	8584105	8588535	0	unaffected	0	unaffected	unaffected
C06E1.5	chrIII	8589216	8589462	0	unaffected	0	unaffected	unaffected
C06E1.7	chrIII	8591158	8593012	0	unaffected	0	unaffected	unaffected
C06E1.8	chrIII	8595287	8597790	0	unaffected	0	unaffected	unaffected
C06E1.9	chrIII	8606427	8609703	0	unaffected	0	unaffected	unaffected
C06E2.1	chrX	8872880	8874581	0	unaffected	0	unaffected	unaffected
C06E2.3	chrX	8869571	8871782	0	unaffected	0	unaffected	unaffected
C06E2.5	chrX	8856997	8857901	0	unaffected	0	unaffected	unaffected
C06E2.7	chrX	8867557	8869203	0	unaffected	0	unaffected	unaffected
C06E2.9	chrX	8861204	8861597	0	unaffected	0	unaffected	unaffected
C06E4.1	chrIV	7283245	7283860	0	unaffected	0	unaffected	unaffected
C06E4.2	chrIV	7276871	7283075	0	unaffected	0	unaffected	unaffected
C06E4.3	chrIV	7260873	7262017	0	unaffected	0	unaffected	unaffected
C06E4.5	chrIV	7254978	7256253	0	unaffected	0	unaffected	unaffected
C06E4.6	chrIV	7257205	7258237	0	unaffected	0	unaffected	unaffected
C06E4.7	chrIV	7262225	7263225	0	unaffected	0	unaffected	unaffected
C06E4.8	chrIV	7284207	7285509	0	unaffected	0	unaffected	unaffected
C06E7.1	chrIV	5848643	5850838	0	unaffected	0	unaffected	unaffected
C06E7.2	chrIV	5839387	5843992	0	unaffected	0	unaffected	unaffected
C06E7.3	chrIV	5843970	5846387	0	unaffected	0	unaffected	unaffected
C06E7.4	chrIV	5850827	5859965	0	unaffected	0	unaffected	unaffected
C06E7.6	chrIV	5864517	5865891	0	unaffected	0	unaffected	unaffected
C06E7.88	chrIV	5865846	5867361	0	unaffected	0	unaffected	unaffected
C06E8.3	chrIII	6990115	7002255	0	unaffected	0	unaffected	unaffected
C06E8.5	chrIII	7002244	7005307	0	unaffected	0	unaffected	unaffected
C06G1.1	chrX	16633289	16637560	0	unaffected	0	unaffected	unaffected
C06G1.2	chrX	16621737	16622666	0	unaffected	0	unaffected	unaffected
C06G1.4	chrX	16613375	16617594	0	unaffected	0	unaffected	unaffected
C06G1.5	chrX	16638171	16642988	0	unaffected	0	unaffected	unaffected
C06G1.6	chrX	16652031	16654410	0	unaffected	0	unaffected	unaffected
C06G3.1	chrIV	7050090	7053424	0	unaffected	0	unaffected	unaffected
C06G3.10	chrIV	7034390	7039569	0	unaffected	0	unaffected	unaffected
C06G3.11	chrIV	7043923	7044593	0	unaffected	0	unaffected	unaffected
C06G3.2	chrIV	7040197	7043683	0	unaffected	0	unaffected	unaffected
C06G3.3	chrIV	7036111	7036458	0	unaffected	0	unaffected	unaffected
C06G3.4	chrIV	7028446	7030992	0	unaffected	0	unaffected	unaffected
C06G3.5	chrIV	7024199	7028135	0	unaffected	0	unaffected	unaffected
C06G3.6	chrIV	7017614	7020191	0	unaffected	0	unaffected	unaffected
C06G3.7	chrIV	7011991	7016569	0	unaffected	0	unaffected	unaffected
C06G3.8	chrIV	7031279	7032548	0	unaffected	0	unaffected	unaffected
C06G3.9	chrIV	7032687	7036850	0	unaffected	0	unaffected	unaffected
C06G4.1	chrIII	7987063	7990484	0	unaffected	0	unaffected	unaffected
C06G4.2	chrIII	7981001	7986272	0	unaffected	0	unaffected	unaffected
C06G4.4	chrIII	7977150	7979695	0	unaffected	0	unaffected	unaffected
C06G4.5	chrIII	7990723	7996383	0	unaffected	0	unaffected	unaffected
C06G4.6	chrIII	8004331	8005770	0	unaffected	0	unaffected	unaffected
C06G8.1	chrIV	10778965	10780691	0	unaffected	0	unaffected	unaffected
C06G8.2	chrIV	10790577	10794544	0	unaffected	0	unaffected	unaffected
C06G8.3	chrIV	10799633	10802229	0	unaffected	0	unaffected	unaffected
C06G8.4	chrIV	10785069	10786811	0	unaffected	0	unaffected	unaffected
C06H2.1	chrV	11122742	11123851	0	unaffected	0	unaffected	unaffected
C06H2.2	chrV	11125203	11127286	0	unaffected	0	unaffected	unaffected
C06H2.3	chrV	11127476	11130067	0	unaffected	0	unaffected	unaffected
C06H2.4	chrV	11141479	11143045	0	unaffected	0	unaffected	unaffected
C06H2.5	chrV	11134590	11140305	0	unaffected	0	unaffected	unaffected
C06H2.6	chrV	11124277	11125040	0	unaffected	0	unaffected	unaffected
C06H2.7	chrV	11143040	11144732	0	unaffected	0	unaffected	unaffected
C06H5.1	chrV	17895280	17896778	0	unaffected	0	unaffected	unaffected
C06H5.2	chrV	17899801	17901887	0	unaffected	0	unaffected	unaffected
C06H5.6	chrV	17879817	17888958	0	unaffected	0	unaffected	unaffected
C06H5.7	chrV	17910290	17917218	0	unaffected	0	unaffected	unaffected
C06H5.8	chrV	17919010	17921727	0	unaffected	0	unaffected	unaffected
C07A12.1	chrX	4554664	4558829	0	unaffected	0	unaffected	unaffected
C07A12.2	chrX	4544847	4545390	0	unaffected	0	unaffected	unaffected
C07A12.3	chrX	4532662	4537506	0	unaffected	0	unaffected	unaffected
C07A12.4	chrX	4524158	4526508	0	unaffected	0	unaffected	unaffected
C07A12.5	chrX	4514070	4516866	0	unaffected	0	unaffected	unaffected
C07A12.7	chrX	4517714	4521041	0	unaffected	0	unaffected	unaffected
C07A4.1	chrX	10167036	10171823	0	unaffected	0	unaffected	unaffected
C07A4.2	chrX	10172266	10174098	0	unaffected	0	unaffected	unaffected
C07A9.1	chrIII	9723197	9725130	0	unaffected	0	unaffected	unaffected
C07A9.10	chrIII	9685085	9686642	0	unaffected	0	unaffected	unaffected
C07A9.11	chrIII	9715798	9720207	0	unaffected	0	unaffected	unaffected
C07A9.12	chrIII	9725200	9727455	0	unaffected	0	unaffected	unaffected
C07A9.13	chrIII	9679613	9681185	0	unaffected	0	unaffected	unaffected
C07A9.2	chrIII	9694583	9696433	0	unaffected	0	unaffected	unaffected
C07A9.3	chrIII	9699796	9710212	0	unaffected	0	unaffected	unaffected
C07A9.4	chrIII	9710164	9713844	0	unaffected	0	unaffected	unaffected
C07A9.5	chrIII	9681439	9682745	0	unaffected	0	unaffected	unaffected
C07A9.6	chrIII	9676244	9678956	0	unaffected	0	unaffected	unaffected
C07A9.7	chrIII	9690953	9694488	0	unaffected	0	unaffected	unaffected
C07A9.8	chrIII	9686848	9690169	0	unaffected	0	unaffected	unaffected
C07A9.9	chrIII	9663207	9667445	0	unaffected	0	unaffected	unaffected
C07B5.3	chrX	9522432	9523170	0	unaffected	0	unaffected	unaffected
C07B5.4	chrX	9529475	9536577	0	unaffected	0	unaffected	unaffected
C07B5.5	chrX	9539847	9542373	0	unaffected	0	unaffected	unaffected
C07B5.6	chrX	9518964	9521429	0	unaffected	0	unaffected	unaffected
C07B5.8	chrX	9536603	9536918	0	unaffected	0	unaffected	unaffected
C07C7.1	chrIV	9185048	9186008	0	unaffected	0	unaffected	unaffected
C07D10.1	chrII	7398966	7400504	0	unaffected	0	unaffected	unaffected
C07D10.2	chrII	7394721	7397308	0	unaffected	0	unaffected	unaffected
C07D10.3	chrII	7387118	7389099	0	unaffected	0	unaffected	unaffected
C07D10.4	chrII	7400500	7402664	0	unaffected	0	unaffected	unaffected
C07D10.5	chrII	7381394	7383447	0	unaffected	0	unaffected	unaffected
C07D8.6	chrX	7341462	7342737	0	unaffected	0	unaffected	unaffected
C07E3.1	chrII	10346920	10349947	0	unaffected	0	unaffected	unaffected
C07E3.10	chrII	10346336	10346948	0	unaffected	0	unaffected	unaffected
C07E3.2	chrII	10339631	10345056	0	unaffected	0	unaffected	unaffected
C07E3.3	chrII	10353572	10357460	0	unaffected	0	unaffected	unaffected
C07E3.4	chrII	10360810	10362937	0	unaffected	0	unaffected	unaffected
C07E3.5	chrII	10363523	10365649	0	unaffected	0	unaffected	unaffected
C07E3.6	chrII	10367667	10369537	0	unaffected	0	unaffected	unaffected
C07E3.8	chrII	10352044	10353403	0	unaffected	0	unaffected	unaffected
C07E3.9	chrII	10350699	10351557	0	unaffected	0	unaffected	unaffected
C07F11.1	chrI	444001	461610	0	unaffected	0	unaffected	unaffected
C07F11.2	chrI	420924	423721	0	unaffected	0	unaffected	unaffected
C07G1.1	chrIV	8210569	8213709	0	unaffected	0	unaffected	unaffected
C07G1.2	chrIV	8206599	8210921	0	unaffected	0	unaffected	unaffected
C07G1.3	chrIV	8176470	8188866	0	unaffected	0	unaffected	unaffected
C07G1.4	chrIV	8188887	8198937	0	unaffected	0	unaffected	unaffected
C07G1.5	chrIV	8201364	8206034	0	unaffected	0	unaffected	unaffected
C07G1.6	chrIV	8209142	8210381	0	unaffected	0	unaffected	unaffected
C07G1.8	chrIV	8200587	8201221	0	unaffected	0	unaffected	unaffected
C07G2.1	chrIII	4489325	4491366	0	unaffected	0	unaffected	unaffected
C07G2.2	chrIII	4491595	4499450	0	unaffected	0	unaffected	unaffected
C07G2.3	chrIII	4499159	4508084	0	unaffected	0	unaffected	unaffected
C07G3.10	chrV	3502303	3503074	0	unaffected	0	unaffected	unaffected
C07G3.2	chrV	3523578	3524572	0	unaffected	0	unaffected	unaffected
C07G3.3	chrV	3518185	3519798	0	unaffected	0	unaffected	unaffected
C07G3.4	chrV	3512677	3514340	0	unaffected	0	unaffected	unaffected
C07G3.5	chrV	3510174	3512035	0	unaffected	0	unaffected	unaffected
C07G3.6	chrV	3507818	3509248	0	unaffected	0	unaffected	unaffected
C07G3.8	chrV	3493633	3500939	0	unaffected	0	unaffected	unaffected
C07G3.9	chrV	3503126	3506349	0	unaffected	0	unaffected	unaffected
C07H4.1	chrII	9091046	9093634	0	unaffected	0	unaffected	unaffected
C07H4.2	chrII	9094617	9098784	0	unaffected	0	unaffected	unaffected
C07H6.1	chrIII	7521396	7524770	0	unaffected	0	unaffected	unaffected
C07H6.2	chrIII	7520937	7521398	0	unaffected	0	unaffected	unaffected
C07H6.3	chrIII	7508109	7515214	0	unaffected	0	unaffected	unaffected
C07H6.4	chrIII	7499642	7503180	0	unaffected	0	unaffected	unaffected
C07H6.5	chrIII	7495201	7497768	0	unaffected	0	unaffected	unaffected
C07H6.6	chrIII	7515156	7518458	0	unaffected	0	unaffected	unaffected
C07H6.7	chrIII	7528602	7536567	0	unaffected	0	unaffected	unaffected
C07H6.8	chrIII	7518560	7520739	0	unaffected	0	unaffected	unaffected
C07H6.9	chrIII	7498264	7499525	0	unaffected	0	unaffected	unaffected
C08A9.1	chrX	17092643	17094149	0	unaffected	0	unaffected	unaffected
C08A9.10	chrX	17081028	17081970	0	unaffected	0	unaffected	unaffected
C08A9.3	chrX	17087807	17093225	0	unaffected	0	unaffected	unaffected
C08A9.6	chrX	17094208	17096463	0	unaffected	0	unaffected	unaffected
C08A9.7	chrX	17099037	17100678	0	unaffected	0	unaffected	unaffected
C08A9.8	chrX	17102770	17104797	0	unaffected	0	unaffected	unaffected
C08A9.9	chrX	17106531	17108296	0	unaffected	0	unaffected	unaffected
C08B11.1	chrII	8017628	8020734	0	unaffected	0	unaffected	unaffected
C08B11.2	chrII	8020727	8022510	0	unaffected	0	unaffected	unaffected
C08B11.3	chrII	8022261	8027707	0	unaffected	0	unaffected	unaffected
C08B11.4	chrII	8028902	8032659	0	unaffected	0	unaffected	unaffected
C08B11.5	chrII	8034292	8035717	0	unaffected	0	unaffected	unaffected
C08B11.6	chrII	8035817	8037296	0	unaffected	0	unaffected	unaffected
C08B11.7	chrII	8038218	8039545	0	unaffected	0	unaffected	unaffected
C08B11.8	chrII	8039953	8041685	0	unaffected	0	unaffected	unaffected
C08B11.9	chrII	8037387	8038115	0	unaffected	0	unaffected	unaffected
C08B6.1	chrV	10102565	10104921	0	unaffected	0	unaffected	unaffected
C08B6.10	chrV	10125026	10127512	0	unaffected	0	unaffected	unaffected
C08B6.11	chrV	10107763	10109873	0	unaffected	0	unaffected	unaffected
C08B6.13	chrV	10121108	10122745	0	unaffected	0	unaffected	unaffected
C08B6.14	chrV	10100130	10101991	0	unaffected	0	unaffected	unaffected
C08B6.2	chrV	10105686	10106666	0	unaffected	0	unaffected	unaffected
C08B6.3	chrV	10109372	10113440	0	unaffected	0	unaffected	unaffected
C08B6.4	chrV	10114739	10117311	0	unaffected	0	unaffected	unaffected
C08B6.5	chrV	10117739	10119663	0	unaffected	0	unaffected	unaffected
C08B6.7	chrV	10130378	10134125	0	unaffected	0	unaffected	unaffected
C08B6.8	chrV	10134635	10143065	0	unaffected	0	unaffected	unaffected
C08B6.9	chrV	10127468	10130272	0	unaffected	0	unaffected	unaffected
C08C3.1	chrIII	7814316	7817062	0	unaffected	0	unaffected	unaffected
C08C3.2	chrIII	7774623	7775962	0	unaffected	0	unaffected	unaffected
C08C3.3	chrIII	7776841	7783389	0	unaffected	0	unaffected	unaffected
C08C3.4	chrIII	7793377	7795344	0	unaffected	0	unaffected	unaffected
C08D8.1	chrV	8345738	8349889	0	unaffected	0	unaffected	unaffected
C08D8.2	chrV	8336637	8340655	0	unaffected	0	unaffected	unaffected
C08E3.10	chrII	1619803	1621268	0	unaffected	0	unaffected	unaffected
C08E3.13	chrII	1632000	1633856	0	unaffected	0	unaffected	unaffected
C08E3.2	chrII	1611337	1612517	0	unaffected	0	unaffected	unaffected
C08E3.3	chrII	1604672	1606150	0	unaffected	0	unaffected	unaffected
C08E3.5	chrII	1607881	1609008	0	unaffected	0	unaffected	unaffected
C08E3.6	chrII	1609261	1610722	0	unaffected	0	unaffected	unaffected
C08E3.9	chrII	1616918	1619011	0	unaffected	0	unaffected	unaffected
C08E8.1	chrV	18361006	18362515	0	unaffected	0	unaffected	unaffected
C08E8.10	chrV	18339091	18339879	0	unaffected	0	unaffected	unaffected
C08E8.3	chrV	18350119	18350527	0	unaffected	0	unaffected	unaffected
C08E8.4	chrV	18371817	18373503	0	unaffected	0	unaffected	unaffected
C08E8.6	chrV	18367985	18368394	0	unaffected	0	unaffected	unaffected
C08E8.9	chrV	18364829	18365196	0	unaffected	0	unaffected	unaffected
C08F1.1	chrII	1797857	1801383	0	unaffected	0	unaffected	unaffected
C08F1.10	chrII	1785267	1786283	0	unaffected	0	unaffected	unaffected
C08F1.11	chrII	1783281	1784448	0	unaffected	0	unaffected	unaffected
C08F1.3	chrII	1789186	1790223	0	unaffected	0	unaffected	unaffected
C08F1.4	chrII	1767853	1778545	0	unaffected	0	unaffected	unaffected
C08F1.5	chrII	1778777	1782313	0	unaffected	0	unaffected	unaffected
C08F1.6	chrII	1787220	1788193	0	unaffected	0	unaffected	unaffected
C08F1.8	chrII	1804162	1808323	0	unaffected	0	unaffected	unaffected
C08F11.1	chrIV	13623810	13625518	0	unaffected	0	unaffected	unaffected
C08F11.10	chrIV	13648012	13649186	0	unaffected	0	unaffected	unaffected
C08F11.11	chrIV	13646706	13647634	0	unaffected	0	unaffected	unaffected
C08F11.13	chrIV	13607415	13609859	0	unaffected	0	unaffected	unaffected
C08F11.3	chrIV	13619483	13621489	0	unaffected	0	unaffected	unaffected
C08F11.5	chrIV	13633414	13635196	0	unaffected	0	unaffected	unaffected
C08F11.7	chrIV	13637263	13638501	0	unaffected	0	unaffected	unaffected
C08F11.8	chrIV	13639241	13644377	0	unaffected	0	unaffected	unaffected
C08F8.1	chrIV	11149832	11150911	0	unaffected	0	unaffected	unaffected
C08F8.2	chrIV	11149167	11154314	0	unaffected	0	unaffected	unaffected
C08F8.3	chrIV	11155007	11156674	0	unaffected	0	unaffected	unaffected
C08F8.4	chrIV	11157127	11159471	0	unaffected	0	unaffected	unaffected
C08F8.5	chrIV	11159548	11162508	0	unaffected	0	unaffected	unaffected
C08F8.6	chrIV	11162764	11164267	0	unaffected	0	unaffected	unaffected
C08F8.7	chrIV	11177264	11178057	0	unaffected	0	unaffected	unaffected
C08F8.8	chrIV	11169812	11174764	0	unaffected	0	unaffected	unaffected
C08F8.9	chrIV	11178056	11178576	0	unaffected	0	unaffected	unaffected
C08G5.2	chrII	739556	740906	0	unaffected	0	unaffected	unaffected
C08G5.3	chrII	743105	745135	0	unaffected	0	unaffected	unaffected
C08G5.4	chrII	745468	750171	0	unaffected	0	unaffected	unaffected
C08G5.5	chrII	756200	764859	0	unaffected	0	unaffected	unaffected
C08G5.6	chrII	770559	772124	0	unaffected	0	unaffected	unaffected
C08G5.7	chrII	761588	765324	0	unaffected	0	unaffected	unaffected
C08G9.1	chrIV	7658722	7664151	0	unaffected	0	unaffected	unaffected
C08G9.2	chrIV	7664165	7672961	0	unaffected	0	unaffected	unaffected
C08H9.1	chrII	9875119	9877949	0	unaffected	0	unaffected	unaffected
C08H9.10	chrII	9853751	9855636	0	unaffected	0	unaffected	unaffected
C08H9.11	chrII	9858050	9859580	0	unaffected	0	unaffected	unaffected
C08H9.13	chrII	9869396	9871113	0	unaffected	0	unaffected	unaffected
C08H9.15	chrII	9881133	9882473	0	unaffected	0	unaffected	unaffected
C08H9.16	chrII	9892729	9894313	0	unaffected	0	unaffected	unaffected
C08H9.2	chrII	9886478	9891029	0	unaffected	0	unaffected	unaffected
C08H9.3	chrII	9882668	9886383	0	unaffected	0	unaffected	unaffected
C08H9.4	chrII	9862371	9866345	0	unaffected	0	unaffected	unaffected
C08H9.5	chrII	9866588	9868702	0	unaffected	0	unaffected	unaffected
C08H9.6	chrII	9873189	9874462	0	unaffected	0	unaffected	unaffected
C08H9.7	chrII	9859724	9861414	0	unaffected	0	unaffected	unaffected
C09B7.1	chrX	2673462	2682353	0	unaffected	0	unaffected	unaffected
C09B7.2	chrX	2668128	2670584	0	unaffected	0	unaffected	unaffected
C09B8.1	chrX	6031433	6034475	0	unaffected	0	unaffected	unaffected
C09B8.3	chrX	6007167	6011275	0	unaffected	0	unaffected	unaffected
C09B8.4	chrX	6018445	6019901	0	unaffected	0	unaffected	unaffected
C09B8.5	chrX	6020830	6022458	0	unaffected	0	unaffected	unaffected
C09B8.6	chrX	6034056	6039461	0	unaffected	0	unaffected	unaffected
C09B8.7	chrX	6044273	6048575	0	unaffected	0	unaffected	unaffected
C09B8.8	chrX	6015456	6017549	0	unaffected	0	unaffected	unaffected
C09B9.1	chrIV	5037806	5040430	0	unaffected	0	unaffected	unaffected
C09B9.2	chrIV	5029257	5031035	0	unaffected	0	unaffected	unaffected
C09B9.3	chrIV	5021179	5029070	0	unaffected	0	unaffected	unaffected
C09B9.4	chrIV	5031559	5033379	0	unaffected	0	unaffected	unaffected
C09B9.6	chrIV	5055584	5056041	0	unaffected	0	unaffected	unaffected
C09B9.7	chrIV	5056964	5059843	0	unaffected	0	unaffected	unaffected
C09B9.8	chrIV	5040917	5045388	0	unaffected	0	unaffected	unaffected
C09C7.1	chrX	7925388	7926541	0	unaffected	0	unaffected	unaffected
C09D1.1	chrI	4035745	4090963	0	unaffected	0	unaffected	unaffected
C09D1.2	chrI	4071800	4072850	0	unaffected	0	unaffected	unaffected
C09D4.1	chrI	5497780	5506518	0	unaffected	0	unaffected	unaffected
C09D4.2	chrI	5491476	5493534	0	unaffected	0	unaffected	unaffected
C09D4.3	chrI	5488342	5490629	0	unaffected	0	unaffected	unaffected
C09D4.4	chrI	5479543	5484646	0	unaffected	0	unaffected	unaffected
C09D4.5	chrI	5484769	5486357	0	unaffected	0	unaffected	unaffected
C09D4.6	chrI	5486489	5487153	0	unaffected	0	unaffected	unaffected
C09D8.1	chrII	10968325	11012333	0	unaffected	0	unaffected	unaffected
C09E10.2	chrX	984617	991232	0	unaffected	0	unaffected	unaffected
C09E7.1	chrIII	6532506	6533766	0	unaffected	0	unaffected	unaffected
C09E7.10	chrIII	6518660	6520003	0	unaffected	0	unaffected	unaffected
C09E7.2	chrIII	6528148	6532035	0	unaffected	0	unaffected	unaffected
C09E7.3	chrIII	6524048	6525607	0	unaffected	0	unaffected	unaffected
C09E7.4	chrIII	6534413	6536942	0	unaffected	0	unaffected	unaffected
C09E7.5	chrIII	6538047	6541259	0	unaffected	0	unaffected	unaffected
C09E7.6	chrIII	6545286	6546351	0	unaffected	0	unaffected	unaffected
C09E7.7	chrIII	6546670	6551225	0	unaffected	0	unaffected	unaffected
C09E7.8	chrIII	6553506	6558522	0	unaffected	0	unaffected	unaffected
C09E7.9	chrIII	6541554	6545120	0	unaffected	0	unaffected	unaffected
C09E8.1	chrII	556483	564123	0	unaffected	0	unaffected	unaffected
C09E8.2	chrII	553093	554785	0	unaffected	0	unaffected	unaffected
C09E8.3	chrII	546703	552025	0	unaffected	0	unaffected	unaffected
C09E9.1	chrIV	1275864	1277091	0	unaffected	0	unaffected	unaffected
C09F12.1	chrX	11047348	11049166	0	unaffected	0	unaffected	unaffected
C09F12.2	chrX	11053877	11056904	0	unaffected	0	unaffected	unaffected
C09F12.3	chrX	11040965	11042791	0	unaffected	0	unaffected	unaffected
C09F5.1	chrIII	658705	662731	0	unaffected	0	unaffected	unaffected
C09F5.2	chrIII	647122	654460	0	unaffected	0	unaffected	unaffected
C09F5.3	chrIII	662843	666261	0	unaffected	0	unaffected	unaffected
C09F9.1	chrII	14698639	14699256	0	unaffected	0	unaffected	unaffected
C09F9.2	chrII	14705440	14712525	0	unaffected	0	unaffected	unaffected
C09F9.3	chrII	14720476	14733383	0	unaffected	0	unaffected	unaffected
C09G1.1	chrX	15966040	15972229	0	unaffected	0	unaffected	unaffected
C09G1.2	chrX	15977690	15982529	0	unaffected	0	unaffected	unaffected
C09G1.3	chrX	15986091	15987523	0	unaffected	0	unaffected	unaffected
C09G1.4	chrX	15987900	15996865	0	unaffected	0	unaffected	unaffected
C09G1.5	chrX	15959028	15962250	0	unaffected	0	unaffected	unaffected
C09G12.1	chrIV	3502135	3503909	0	unaffected	0	unaffected	unaffected
C09G12.10	chrIV	3504440	3506112	0	unaffected	0	unaffected	unaffected
C09G12.11	chrIV	3482891	3484703	0	unaffected	0	unaffected	unaffected
C09G12.16	chrIV	3480007	3481857	0	unaffected	0	unaffected	unaffected
C09G12.17	chrIV	3495292	3496437	0	unaffected	0	unaffected	unaffected
C09G12.2	chrIV	3493606	3495176	0	unaffected	0	unaffected	unaffected
C09G12.3	chrIV	3491773	3493213	0	unaffected	0	unaffected	unaffected
C09G12.8	chrIV	3506285	3509526	0	unaffected	0	unaffected	unaffected
C09G12.9	chrIV	3510470	3514559	0	unaffected	0	unaffected	unaffected
C09G4.1	chrIV	8540540	8544366	0	unaffected	0	unaffected	unaffected
C09G4.2	chrIV	8520880	8538173	0	unaffected	0	unaffected	unaffected
C09G4.5	chrIV	8511270	8514709	0	unaffected	0	unaffected	unaffected
C09G5.1	chrII	10694994	10702465	0	unaffected	0	unaffected	unaffected
C09G5.2	chrII	10702173	10714240	0	unaffected	0	unaffected	unaffected
C09G5.4	chrII	10704843	10705961	0	unaffected	0	unaffected	unaffected
C09G5.5	chrII	10707143	10708227	0	unaffected	0	unaffected	unaffected
C09G5.6	chrII	10708900	10712066	0	unaffected	0	unaffected	unaffected
C09G5.7	chrII	10714853	10716395	0	unaffected	0	unaffected	unaffected
C09G5.8	chrII	10717276	10729193	0	unaffected	0	unaffected	unaffected
C09G9.1	chrIV	8862474	8865477	0	unaffected	0	unaffected	unaffected
C09G9.2	chrIV	8868023	8869668	0	unaffected	0	unaffected	unaffected
C09G9.3	chrIV	8869948	8873044	0	unaffected	0	unaffected	unaffected
C09G9.4	chrIV	8874133	8876963	0	unaffected	0	unaffected	unaffected
C09G9.5	chrIV	8886512	8888589	0	unaffected	0	unaffected	unaffected
C09G9.6	chrIV	8888959	8890987	0	unaffected	0	unaffected	unaffected
C09G9.7	chrIV	8877515	8879880	0	unaffected	0	unaffected	unaffected
C09H10.10	chrII	11094986	11096417	0	unaffected	0	unaffected	unaffected
C09H10.2	chrII	11096508	11097148	0	unaffected	0	unaffected	unaffected
C09H10.3	chrII	11097782	11100260	0	unaffected	0	unaffected	unaffected
C09H10.5	chrII	11100913	11102890	0	unaffected	0	unaffected	unaffected
C09H10.6	chrII	11106557	11108365	0	unaffected	0	unaffected	unaffected
C09H10.7	chrII	11108126	11109525	0	unaffected	0	unaffected	unaffected
C09H10.8	chrII	11109525	11111111	0	unaffected	0	unaffected	unaffected
C09H10.9	chrII	11104403	11105988	0	unaffected	0	unaffected	unaffected
C09H5.2	chrV	8076064	8079894	0	unaffected	0	unaffected	unaffected
C09H5.4	chrV	8068131	8069709	0	unaffected	0	unaffected	unaffected
C09H5.5	chrV	8070622	8072124	0	unaffected	0	unaffected	unaffected
C09H5.6	chrV	8080346	8081658	0	unaffected	0	unaffected	unaffected
C09H6.1	chrI	8103595	8109222	0	unaffected	0	unaffected	unaffected
C09H6.2	chrI	8109737	8119309	0	unaffected	0	unaffected	unaffected
C09H6.3	chrI	8125793	8130081	0	unaffected	0	unaffected	unaffected
C10A4.1	chrX	7415793	7418582	0	unaffected	0	unaffected	unaffected
C10A4.10	chrX	7398921	7400812	0	unaffected	0	unaffected	unaffected
C10A4.3	chrX	7407409	7408736	0	unaffected	0	unaffected	unaffected
C10A4.4	chrX	7402084	7403567	0	unaffected	0	unaffected	unaffected
C10A4.5	chrX	7393870	7396270	0	unaffected	0	unaffected	unaffected
C10A4.6	chrX	7390527	7392230	0	unaffected	0	unaffected	unaffected
C10A4.7	chrX	7413565	7415475	0	unaffected	0	unaffected	unaffected
C10A4.8	chrX	7422627	7424836	0	unaffected	0	unaffected	unaffected
C10B5.1	chrV	8581238	8583555	0	unaffected	0	unaffected	unaffected
C10B5.3	chrV	8583531	8584510	0	unaffected	0	unaffected	unaffected
C10C5.1	chrIV	9359423	9366489	0	unaffected	0	unaffected	unaffected
C10C5.2	chrIV	9371490	9373619	0	unaffected	0	unaffected	unaffected
C10C5.3	chrIV	9374212	9376475	0	unaffected	0	unaffected	unaffected
C10C5.4	chrIV	9378585	9380433	0	unaffected	0	unaffected	unaffected
C10C5.5	chrIV	9381403	9383098	0	unaffected	0	unaffected	unaffected
C10C5.6	chrIV	9386190	9394905	0	unaffected	0	unaffected	unaffected
C10C5.7	chrIV	9385106	9385602	0	unaffected	0	unaffected	unaffected
C10C6.1	chrIV	11425719	11447043	0	unaffected	0	unaffected	unaffected
C10C6.2	chrIV	11459969	11463173	0	unaffected	0	unaffected	unaffected
C10C6.3	chrIV	11463514	11465204	0	unaffected	0	unaffected	unaffected
C10C6.5	chrIV	11470162	11473395	0	unaffected	0	unaffected	unaffected
C10C6.6	chrIV	11473344	11479231	0	unaffected	0	unaffected	unaffected
C10C6.7	chrIV	11465406	11467331	0	unaffected	0	unaffected	unaffected
C10E2.1	chrX	16763635	16766583	0	unaffected	0	unaffected	unaffected
C10E2.2	chrX	16745665	16748135	0	unaffected	0	unaffected	unaffected
C10E2.3	chrX	16729485	16744625	0	unaffected	0	unaffected	unaffected
C10E2.4	chrX	16749681	16751037	0	unaffected	0	unaffected	unaffected
C10E2.5	chrX	16751790	16753600	0	unaffected	0	unaffected	unaffected
C10E2.6	chrX	16767106	16770427	0	unaffected	0	unaffected	unaffected
C10F3.1	chrV	5996339	5999329	0	unaffected	0	unaffected	unaffected
C10F3.2	chrV	5983727	5985494	0	unaffected	0	unaffected	unaffected
C10F3.3	chrV	5976011	5981496	0	unaffected	0	unaffected	unaffected
C10F3.4	chrV	5961795	5969137	0	unaffected	0	unaffected	unaffected
C10F3.5	chrV	5960566	5963820	0	unaffected	0	unaffected	unaffected
C10F3.6	chrV	5986949	5990235	0	unaffected	0	unaffected	unaffected
C10F3.7	chrV	5985422	5986837	0	unaffected	0	unaffected	unaffected
C10G11.1	chrI	6307328	6308431	0	unaffected	0	unaffected	unaffected
C10G11.10	chrI	6305027	6306382	0	unaffected	0	unaffected	unaffected
C10G11.5	chrI	6294897	6297638	0	unaffected	0	unaffected	unaffected
C10G11.6	chrI	6289432	6293857	0	unaffected	0	unaffected	unaffected
C10G11.7	chrI	6284972	6289342	0	unaffected	0	unaffected	unaffected
C10G11.8	chrI	6271982	6273770	0	unaffected	0	unaffected	unaffected
C10G11.9	chrI	6274576	6275270	0	unaffected	0	unaffected	unaffected
C10G6.1	chrIV	5820358	5830189	0	unaffected	0	unaffected	unaffected
C10G8.1	chrV	5331250	5333039	0	unaffected	0	unaffected	unaffected
C10G8.3	chrV	5312873	5314273	0	unaffected	0	unaffected	unaffected
C10G8.4	chrV	5311918	5312300	0	unaffected	0	unaffected	unaffected
C10G8.5	chrV	5303670	5311230	0	unaffected	0	unaffected	unaffected
C10G8.6	chrV	5315496	5319561	0	unaffected	0	unaffected	unaffected
C10G8.7	chrV	5323187	5324600	0	unaffected	0	unaffected	unaffected
C10G8.8	chrV	5324781	5328454	0	unaffected	0	unaffected	unaffected
C10H11.1	chrI	4747627	4759602	0	unaffected	0	unaffected	unaffected
C10H11.10	chrI	4759817	4761324	0	unaffected	0	unaffected	unaffected
C10H11.3	chrI	4731604	4735280	0	unaffected	0	unaffected	unaffected
C10H11.4	chrI	4727301	4730367	0	unaffected	0	unaffected	unaffected
C10H11.5	chrI	4724065	4726780	0	unaffected	0	unaffected	unaffected
C10H11.6	chrI	4721178	4723961	0	unaffected	0	unaffected	unaffected
C10H11.7	chrI	4719789	4721099	0	unaffected	0	unaffected	unaffected
C10H11.8	chrI	4735756	4737848	0	unaffected	0	unaffected	unaffected
C10H11.9	chrI	4738170	4744322	0	unaffected	0	unaffected	unaffected
C11D2.2	chrIV	6185876	6189194	0	unaffected	0	unaffected	unaffected
C11D2.3	chrIV	6154094	6154612	0	unaffected	0	unaffected	unaffected
C11D2.4	chrIV	6155481	6156895	0	unaffected	0	unaffected	unaffected
C11D2.6	chrIV	6157298	6173029	0	unaffected	0	unaffected	unaffected
C11D2.7	chrIV	6154545	6155390	0	unaffected	0	unaffected	unaffected
C11D9.1	chrI	4422032	4426177	0	unaffected	0	unaffected	unaffected
C11E4.1	chrX	9584614	9586433	0	unaffected	0	unaffected	unaffected
C11E4.2	chrX	9587884	9588822	0	unaffected	0	unaffected	unaffected
C11E4.3	chrX	9589365	9595433	0	unaffected	0	unaffected	unaffected
C11E4.6	chrX	9610503	9616967	0	unaffected	0	unaffected	unaffected
C11E4.7	chrX	9617189	9618751	0	unaffected	0	unaffected	unaffected
C11E4.8	chrX	9623246	9624657	0	unaffected	0	unaffected	unaffected
C11G10.1	chrX	15157287	15158547	0	unaffected	0	unaffected	unaffected
C11G10.2	chrX	15141934	15142334	0	unaffected	0	unaffected	unaffected
C11G6.1	chrX	16332367	16335868	0	unaffected	0	unaffected	unaffected
C11G6.2	chrX	16329144	16329925	0	unaffected	0	unaffected	unaffected
C11G6.3	chrX	16340640	16345955	0	unaffected	0	unaffected	unaffected
C11G6.4	chrX	16354903	16359582	0	unaffected	0	unaffected	unaffected
C11H1.2	chrX	14304862	14307697	0	unaffected	0	unaffected	unaffected
C11H1.3	chrX	14307792	14311613	0	unaffected	0	unaffected	unaffected
C11H1.4	chrX	14313650	14326730	0	unaffected	0	unaffected	unaffected
C11H1.5	chrX	14298020	14303070	0	unaffected	0	unaffected	unaffected
C11H1.7	chrX	14327547	14330125	0	unaffected	0	unaffected	unaffected
C11H1.8	chrX	14295751	14296586	0	unaffected	0	unaffected	unaffected
C11H1.9	chrX	14318062	14320328	0	unaffected	0	unaffected	unaffected
C12C8.1	chrI	9320352	9322503	0	unaffected	0	unaffected	unaffected
C12C8.2	chrI	9327848	9330922	0	unaffected	0	unaffected	unaffected
C12C8.3	chrI	9335763	9342488	0	unaffected	0	unaffected	unaffected
C12D12.1	chrX	3499239	3505240	0	unaffected	0	unaffected	unaffected
C12D12.2	chrX	3496012	3499156	0	unaffected	0	unaffected	unaffected
C12D12.3	chrX	3489279	3491142	0	unaffected	0	unaffected	unaffected
C12D12.5	chrX	3505426	3506352	0	unaffected	0	unaffected	unaffected
C12D5.2	chrV	7686362	7688140	0	unaffected	0	unaffected	unaffected
C12D5.3	chrV	7676184	7676944	0	unaffected	0	unaffected	unaffected
C12D5.4	chrV	7672069	7673027	0	unaffected	0	unaffected	unaffected
C12D5.5	chrV	7668220	7668967	0	unaffected	0	unaffected	unaffected
C12D5.7	chrV	7679294	7681518	0	unaffected	0	unaffected	unaffected
C12D5.8	chrV	7684320	7686316	0	unaffected	0	unaffected	unaffected
C12D5.9	chrV	7688313	7689957	0	unaffected	0	unaffected	unaffected
C12D8.1	chrV	10236132	10238836	0	unaffected	0	unaffected	unaffected
C12D8.10	chrV	10248879	10252870	0	unaffected	0	unaffected	unaffected
C12D8.11	chrV	10252796	10255032	0	unaffected	0	unaffected	unaffected
C12D8.12	chrV	10231681	10233389	0	unaffected	0	unaffected	unaffected
C12D8.14	chrV	10228025	10228379	0	unaffected	0	unaffected	unaffected
C12D8.15	chrV	10228690	10229215	0	unaffected	0	unaffected	unaffected
C12D8.16	chrV	10229785	10230108	0	unaffected	0	unaffected	unaffected
C12D8.17	chrV	10231241	10231510	0	unaffected	0	unaffected	unaffected
C12D8.21	chrV	10240547	10241163	0	unaffected	0	unaffected	unaffected
C12D8.4	chrV	10226858	10227408	0	unaffected	0	unaffected	unaffected
C12D8.5	chrV	10223420	10225696	0	unaffected	0	unaffected	unaffected
C12D8.6	chrV	10239620	10240160	0	unaffected	0	unaffected	unaffected
C13A10.1	chrII	1350691	1355645	0	unaffected	0	unaffected	unaffected
C13A10.2	chrII	1357183	1358014	0	unaffected	0	unaffected	unaffected
C13A2.1	chrV	7289008	7291813	0	unaffected	0	unaffected	unaffected
C13A2.12	chrV	7258789	7260139	0	unaffected	0	unaffected	unaffected
C13A2.3	chrV	7282335	7284738	0	unaffected	0	unaffected	unaffected
C13A2.5	chrV	7275772	7278506	0	unaffected	0	unaffected	unaffected
C13A2.6	chrV	7269712	7272769	0	unaffected	0	unaffected	unaffected
C13A2.7	chrV	7266334	7268788	0	unaffected	0	unaffected	unaffected
C13B4.1	chrII	14470296	14479551	0	unaffected	0	unaffected	unaffected
C13B4.2	chrII	14485548	14488615	0	unaffected	0	unaffected	unaffected
C13B9.2	chrIII	6620213	6622156	0	unaffected	0	unaffected	unaffected
C13B9.3	chrIII	6622601	6624919	0	unaffected	0	unaffected	unaffected
C13B9.4	chrIII	6632787	6652030	0	unaffected	0	unaffected	unaffected
C13C12.1	chrV	12514856	12515667	0	unaffected	0	unaffected	unaffected
C13C12.2	chrV	12523627	12525637	0	unaffected	0	unaffected	unaffected
C13C4.1	chrV	12101749	12106488	0	unaffected	0	unaffected	unaffected
C13C4.2	chrV	12101266	12103267	0	unaffected	0	unaffected	unaffected
C13C4.3	chrV	12107122	12109118	0	unaffected	0	unaffected	unaffected
C13C4.4	chrV	12109145	12110959	0	unaffected	0	unaffected	unaffected
C13C4.5	chrV	12114971	12117542	0	unaffected	0	unaffected	unaffected
C13C4.6	chrV	12121649	12125077	0	unaffected	0	unaffected	unaffected
C13C4.7	chrV	12118972	12120795	0	unaffected	0	unaffected	unaffected
C13D9.1	chrV	5012978	5015197	0	unaffected	0	unaffected	unaffected
C13D9.2	chrV	5007213	5011713	0	unaffected	0	unaffected	unaffected
C13D9.3	chrV	5001476	5003399	0	unaffected	0	unaffected	unaffected
C13D9.6	chrV	4981794	4983177	0	unaffected	0	unaffected	unaffected
C13D9.7	chrV	4983734	4987183	0	unaffected	0	unaffected	unaffected
C13D9.8	chrV	4991489	4995049	0	unaffected	0	unaffected	unaffected
C13D9.9	chrV	4997007	5000553	0	unaffected	0	unaffected	unaffected
C13E3.1	chrX	8893075	8898464	0	unaffected	0	unaffected	unaffected
C13F10.1	chrV	7223835	7225050	0	unaffected	0	unaffected	unaffected
C13F10.2	chrV	7221460	7222039	0	unaffected	0	unaffected	unaffected
C13F10.4	chrV	7205602	7214885	0	unaffected	0	unaffected	unaffected
C13F10.5	chrV	7214998	7219022	0	unaffected	0	unaffected	unaffected
C13F10.6	chrV	7219103	7221023	0	unaffected	0	unaffected	unaffected
C13F10.7	chrV	7222030	7223261	0	unaffected	0	unaffected	unaffected
C13G3.1	chrV	11011424	11012444	0	unaffected	0	unaffected	unaffected
C13G3.2	chrV	11021042	11022855	0	unaffected	0	unaffected	unaffected
C13G3.3	chrV	11027152	11030827	0	unaffected	0	unaffected	unaffected
C13G5.1	chrIII	8622577	8625920	0	unaffected	0	unaffected	unaffected
C13G5.2	chrIII	8616697	8618359	0	unaffected	0	unaffected	unaffected
C14A11.2	chrX	2803103	2804822	0	unaffected	0	unaffected	unaffected
C14A11.3	chrX	2785592	2799243	0	unaffected	0	unaffected	unaffected
C14A11.5	chrX	2805066	2807520	0	unaffected	0	unaffected	unaffected
C14A11.6	chrX	2810475	2814117	0	unaffected	0	unaffected	unaffected
C14A11.7	chrX	2823281	2826819	0	unaffected	0	unaffected	unaffected
C14A11.9	chrX	2807900	2809623	0	unaffected	0	unaffected	unaffected
C14A4.1	chrII	10579893	10580985	0	unaffected	0	unaffected	unaffected
C14A4.10	chrII	10604969	10605555	0	unaffected	0	unaffected	unaffected
C14A4.11	chrII	10605658	10607566	0	unaffected	0	unaffected	unaffected
C14A4.12	chrII	10612960	10618276	0	unaffected	0	unaffected	unaffected
C14A4.13	chrII	10618411	10620445	0	unaffected	0	unaffected	unaffected
C14A4.14	chrII	10582556	10584177	0	unaffected	0	unaffected	unaffected
C14A4.15	chrII	10600426	10602217	0	unaffected	0	unaffected	unaffected
C14A4.2	chrII	10581071	10582460	0	unaffected	0	unaffected	unaffected
C14A4.3	chrII	10584284	10587874	0	unaffected	0	unaffected	unaffected
C14A4.4	chrII	10587982	10592594	0	unaffected	0	unaffected	unaffected
C14A4.5	chrII	10592690	10593471	0	unaffected	0	unaffected	unaffected
C14A4.6	chrII	10593222	10594719	0	unaffected	0	unaffected	unaffected
C14A4.7	chrII	10595202	10596503	0	unaffected	0	unaffected	unaffected
C14A4.8	chrII	10597073	10598041	0	unaffected	0	unaffected	unaffected
C14A4.9	chrII	10599270	10600470	0	unaffected	0	unaffected	unaffected
C14A6.1	chrV	18157998	18159582	0	unaffected	0	unaffected	unaffected
C14A6.13	chrV	18159624	18161311	0	unaffected	0	unaffected	unaffected
C14A6.2	chrV	18148782	18154368	0	unaffected	0	unaffected	unaffected
C14A6.3	chrV	18146370	18148721	0	unaffected	0	unaffected	unaffected
C14A6.6	chrV	18165265	18167203	0	unaffected	0	unaffected	unaffected
C14A6.8	chrV	18169058	18171590	0	unaffected	0	unaffected	unaffected
C14B1.1	chrIII	3699700	3701458	0	unaffected	0	unaffected	unaffected
C14B1.10	chrIII	3709311	3713334	0	unaffected	0	unaffected	unaffected
C14B1.12	chrIII	3724202	3724962	0	unaffected	0	unaffected	unaffected
C14B1.2	chrIII	3702263	3703154	0	unaffected	0	unaffected	unaffected
C14B1.3	chrIII	3703629	3705036	0	unaffected	0	unaffected	unaffected
C14B1.4	chrIII	3705246	3706767	0	unaffected	0	unaffected	unaffected
C14B1.5	chrIII	3706865	3709204	0	unaffected	0	unaffected	unaffected
C14B1.6	chrIII	3713442	3718729	0	unaffected	0	unaffected	unaffected
C14B1.7	chrIII	3719885	3723579	0	unaffected	0	unaffected	unaffected
C14B1.8	chrIII	3718715	3719655	0	unaffected	0	unaffected	unaffected
C14B1.9	chrIII	3725055	3726484	0	unaffected	0	unaffected	unaffected
C14B4.2	chrV	19332695	19349458	0	unaffected	0	unaffected	unaffected
C14B9.1	chrIII	8138023	8139565	0	unaffected	0	unaffected	unaffected
C14B9.10	chrIII	8130795	8132376	0	unaffected	0	unaffected	unaffected
C14B9.2	chrIII	8133598	8136583	0	unaffected	0	unaffected	unaffected
C14B9.3	chrIII	8108723	8111198	0	unaffected	0	unaffected	unaffected
C14B9.4	chrIII	8101280	8104010	0	unaffected	0	unaffected	unaffected
C14B9.6	chrIII	8111099	8125409	0	unaffected	0	unaffected	unaffected
C14B9.7	chrIII	8129483	8130397	0	unaffected	0	unaffected	unaffected
C14B9.8	chrIII	8139544	8144565	0	unaffected	0	unaffected	unaffected
C14C10.1	chrV	12588408	12589602	0	unaffected	0	unaffected	unaffected
C14C10.2	chrV	12590959	12592463	0	unaffected	0	unaffected	unaffected
C14C10.3	chrV	12596370	12599135	0	unaffected	0	unaffected	unaffected
C14C10.4	chrV	12592546	12596280	0	unaffected	0	unaffected	unaffected
C14C10.5	chrV	12600267	12607287	0	unaffected	0	unaffected	unaffected
C14C10.6	chrV	12607392	12608090	0	unaffected	0	unaffected	unaffected
C14C10.7	chrV	12589692	12590637	0	unaffected	0	unaffected	unaffected
C14C11.1	chrV	5663583	5665247	0	unaffected	0	unaffected	unaffected
C14C11.2	chrV	5660911	5663480	0	unaffected	0	unaffected	unaffected
C14C11.3	chrV	5654430	5658671	0	unaffected	0	unaffected	unaffected
C14C11.4	chrV	5647547	5651027	0	unaffected	0	unaffected	unaffected
C14C11.5	chrV	5644470	5646215	0	unaffected	0	unaffected	unaffected
C14C11.6	chrV	5658690	5660690	0	unaffected	0	unaffected	unaffected
C14C11.7	chrV	5665222	5666447	0	unaffected	0	unaffected	unaffected
C14C11.8	chrV	5669594	5676071	0	unaffected	0	unaffected	unaffected
C14C6.1	chrV	560195	562957	0	unaffected	0	unaffected	unaffected
C14C6.10	chrV	564391	566085	0	unaffected	0	unaffected	unaffected
C14C6.2	chrV	563135	564383	0	unaffected	0	unaffected	unaffected
C14C6.3	chrV	543469	545360	0	unaffected	0	unaffected	unaffected
C14C6.4	chrV	539202	541487	0	unaffected	0	unaffected	unaffected
C14C6.5	chrV	536628	537419	0	unaffected	0	unaffected	unaffected
C14C6.6	chrV	545844	548081	0	unaffected	0	unaffected	unaffected
C14C6.8	chrV	551279	552979	0	unaffected	0	unaffected	unaffected
C14E2.1	chrX	1826459	1827348	0	unaffected	0	unaffected	unaffected
C14E2.2	chrX	1806748	1809537	0	unaffected	0	unaffected	unaffected
C14E2.3	chrX	1810679	1811530	0	unaffected	0	unaffected	unaffected
C14E2.4	chrX	1818858	1821318	0	unaffected	0	unaffected	unaffected
C14E2.5	chrX	1823609	1825334	0	unaffected	0	unaffected	unaffected
C14E2.6	chrX	1827731	1828481	0	unaffected	0	unaffected	unaffected
C14E2.7	chrX	1816354	1816756	0	unaffected	0	unaffected	unaffected
C14F11.1	chrX	6240918	6242690	0	unaffected	0	unaffected	unaffected
C14F11.2	chrX	6208730	6213876	0	unaffected	0	unaffected	unaffected
C14F11.3	chrX	6226095	6230665	0	unaffected	0	unaffected	unaffected
C14F11.4	chrX	6230882	6233012	0	unaffected	0	unaffected	unaffected
C14F11.5	chrX	6233112	6235505	0	unaffected	0	unaffected	unaffected
C14F11.6	chrX	6237984	6239051	0	unaffected	0	unaffected	unaffected
C14F11.7	chrX	6208125	6208528	0	unaffected	0	unaffected	unaffected
C14F5.1	chrX	7954306	7956143	0	unaffected	0	unaffected	unaffected
C14F5.2	chrX	7930689	7931760	0	unaffected	0	unaffected	unaffected
C14F5.3	chrX	7937518	7945000	0	unaffected	0	unaffected	unaffected
C14F5.4	chrX	7956146	7958261	0	unaffected	0	unaffected	unaffected
C14F5.5	chrX	7959778	7961677	0	unaffected	0	unaffected	unaffected
C14H10.1	chrX	10233684	10236886	0	unaffected	0	unaffected	unaffected
C14H10.2	chrX	10242266	10251295	0	unaffected	0	unaffected	unaffected
C14H10.3	chrX	10220579	10228076	0	unaffected	0	unaffected	unaffected
C15A11.1	chrI	7385867	7387106	0	unaffected	0	unaffected	unaffected
C15A11.2	chrI	7384394	7388792	0	unaffected	0	unaffected	unaffected
C15A11.3	chrI	7389042	7395915	0	unaffected	0	unaffected	unaffected
C15A11.4	chrI	7398820	7401020	0	unaffected	0	unaffected	unaffected
C15A11.6	chrI	7403337	7404349	0	unaffected	0	unaffected	unaffected
C15A11.7	chrI	7405026	7408508	0	unaffected	0	unaffected	unaffected
C15A7.1	chrX	12065195	12067364	0	unaffected	0	unaffected	unaffected
C15A7.2	chrX	12070674	12073795	0	unaffected	0	unaffected	unaffected
C15A7.4	chrX	12068481	12070495	0	unaffected	0	unaffected	unaffected
C15B12.1	chrX	6476775	6479048	0	unaffected	0	unaffected	unaffected
C15B12.2	chrX	6461946	6465396	0	unaffected	0	unaffected	unaffected
C15B12.4	chrX	6470328	6473711	0	unaffected	0	unaffected	unaffected
C15B12.5	chrX	6479600	6484773	0	unaffected	0	unaffected	unaffected
C15B12.6	chrX	6497882	6499799	0	unaffected	0	unaffected	unaffected
C15B12.7	chrX	6499871	6504576	0	unaffected	0	unaffected	unaffected
C15B12.8	chrX	6474236	6476743	0	unaffected	0	unaffected	unaffected
C15B12.9	chrX	6468761	6469766	0	unaffected	0	unaffected	unaffected
C15C6.1	chrI	12202220	12203708	0	unaffected	0	unaffected	unaffected
C15C6.2	chrI	12203790	12205800	0	unaffected	0	unaffected	unaffected
C15C6.3	chrI	12207085	12212197	0	unaffected	0	unaffected	unaffected
C15C6.4	chrI	12213099	12215175	0	unaffected	0	unaffected	unaffected
C15C7.1	chrX	3164512	3165646	0	unaffected	0	unaffected	unaffected
C15C7.2	chrX	3159927	3164419	0	unaffected	0	unaffected	unaffected
C15C7.4	chrX	3146562	3147078	0	unaffected	0	unaffected	unaffected
C15C7.5	chrX	3151134	3152453	0	unaffected	0	unaffected	unaffected
C15C7.6	chrX	3167559	3170498	0	unaffected	0	unaffected	unaffected
C15C7.7	chrX	3165785	3167589	0	unaffected	0	unaffected	unaffected
C15C8.1	chrV	12734165	12736024	0	unaffected	0	unaffected	unaffected
C15C8.2	chrV	12736685	12741194	0	unaffected	0	unaffected	unaffected
C15C8.3	chrV	12742021	12744153	0	unaffected	0	unaffected	unaffected
C15C8.4	chrV	12745182	12747447	0	unaffected	0	unaffected	unaffected
C15C8.5	chrV	12748274	12749946	0	unaffected	0	unaffected	unaffected
C15C8.6	chrV	12750012	12751528	0	unaffected	0	unaffected	unaffected
C15C8.7	chrV	12744142	12745033	0	unaffected	0	unaffected	unaffected
C15C8.8	chrV	12751585	12752490	0	unaffected	0	unaffected	unaffected
C15F1.1	chrII	6988735	6991644	0	unaffected	0	unaffected	unaffected
C15F1.2	chrII	6979908	6988587	0	unaffected	0	unaffected	unaffected
C15F1.3	chrII	6955363	6965645	0	unaffected	0	unaffected	unaffected
C15F1.4	chrII	6965757	6967606	0	unaffected	0	unaffected	unaffected
C15F1.5	chrII	6967861	6970543	0	unaffected	0	unaffected	unaffected
C15F1.6	chrII	6970625	6972195	0	unaffected	0	unaffected	unaffected
C15F1.7	chrII	6972669	6973850	0	unaffected	0	unaffected	unaffected
C15F1.8	chrII	6976767	6977325	0	unaffected	0	unaffected	unaffected
C15H11.1	chrV	14393842	14394449	0	unaffected	0	unaffected	unaffected
C15H11.11	chrV	14415798	14416131	0	unaffected	0	unaffected	unaffected
C15H11.2	chrV	14409062	14411880	0	unaffected	0	unaffected	unaffected
C15H11.3	chrV	14412389	14415777	0	unaffected	0	unaffected	unaffected
C15H11.4	chrV	14420036	14422605	0	unaffected	0	unaffected	unaffected
C15H11.5	chrV	14417939	14420066	0	unaffected	0	unaffected	unaffected
C15H11.6	chrV	14416099	14417814	0	unaffected	0	unaffected	unaffected
C15H11.7	chrV	14421439	14422605	0	unaffected	0	unaffected	unaffected
C15H11.8	chrV	14422704	14423346	0	unaffected	0	unaffected	unaffected
C15H11.9	chrV	14423760	14424995	0	unaffected	0	unaffected	unaffected
C15H7.3	chrIII	9650336	9651875	0	unaffected	0	unaffected	unaffected
C15H7.4	chrIII	9654267	9655775	0	unaffected	0	unaffected	unaffected
C15H9.1	chrX	6122279	6127506	0	unaffected	0	unaffected	unaffected
C15H9.11	chrX	6102845	6103397	0	unaffected	0	unaffected	unaffected
C15H9.2	chrX	6118675	6120401	0	unaffected	0	unaffected	unaffected
C15H9.3	chrX	6115768	6118016	0	unaffected	0	unaffected	unaffected
C15H9.4	chrX	6101179	6105427	0	unaffected	0	unaffected	unaffected
C15H9.5	chrX	6093250	6097536	0	unaffected	0	unaffected	unaffected
C15H9.6	chrX	6088979	6092089	0	unaffected	0	unaffected	unaffected
C15H9.7	chrX	6106881	6109310	0	unaffected	0	unaffected	unaffected
C15H9.8	chrX	6110759	6112881	0	unaffected	0	unaffected	unaffected
C15H9.9	chrX	6127418	6128291	0	unaffected	0	unaffected	unaffected
C16A11.1	chrII	4247191	4255284	0	unaffected	0	unaffected	unaffected
C16A11.10	chrII	4231385	4234623	0	unaffected	0	unaffected	unaffected
C16A11.2	chrII	4238175	4244835	0	unaffected	0	unaffected	unaffected
C16A11.3	chrII	4229588	4230812	0	unaffected	0	unaffected	unaffected
C16A11.4	chrII	4227048	4229171	0	unaffected	0	unaffected	unaffected
C16A11.5	chrII	4223316	4226333	0	unaffected	0	unaffected	unaffected
C16A11.6	chrII	4236503	4237752	0	unaffected	0	unaffected	unaffected
C16A11.7	chrII	4255507	4256942	0	unaffected	0	unaffected	unaffected
C16A11.8	chrII	4257094	4258784	0	unaffected	0	unaffected	unaffected
C16A11.9	chrII	4234952	4235985	0	unaffected	0	unaffected	unaffected
C16A3.1	chrIII	6390892	6393790	0	unaffected	0	unaffected	unaffected
C16A3.10	chrIII	6394180	6396129	0	unaffected	0	unaffected	unaffected
C16A3.2	chrIII	6389779	6390785	0	unaffected	0	unaffected	unaffected
C16A3.3	chrIII	6383498	6389360	0	unaffected	0	unaffected	unaffected
C16A3.4	chrIII	6381578	6382971	0	unaffected	0	unaffected	unaffected
C16A3.5	chrIII	6380641	6381929	0	unaffected	0	unaffected	unaffected
C16A3.6	chrIII	6379395	6380621	0	unaffected	0	unaffected	unaffected
C16A3.7	chrIII	6375325	6379124	0	unaffected	0	unaffected	unaffected
C16A3.8	chrIII	6367988	6374039	0	unaffected	0	unaffected	unaffected
C16A3.9	chrIII	6374040	6374950	0	unaffected	0	unaffected	unaffected
C16B8.1	chrX	3958476	3961886	0	unaffected	0	unaffected	unaffected
C16B8.2	chrX	3961872	3966302	0	unaffected	0	unaffected	unaffected
C16B8.3	chrX	3968015	3968617	0	unaffected	0	unaffected	unaffected
C16B8.4	chrX	3970368	3973614	0	unaffected	0	unaffected	unaffected
C16C10.1	chrIII	4178697	4181414	0	unaffected	0	unaffected	unaffected
C16C10.10	chrIII	4153574	4154619	0	unaffected	0	unaffected	unaffected
C16C10.11	chrIII	4152025	4152886	0	unaffected	0	unaffected	unaffected
C16C10.12	chrIII	4147354	4151572	0	unaffected	0	unaffected	unaffected
C16C10.13	chrIII	4176651	4177552	0	unaffected	0	unaffected	unaffected
C16C10.2	chrIII	4177505	4178642	0	unaffected	0	unaffected	unaffected
C16C10.3	chrIII	4172307	4176135	0	unaffected	0	unaffected	unaffected
C16C10.4	chrIII	4171238	4172154	0	unaffected	0	unaffected	unaffected
C16C10.5	chrIII	4168770	4171135	0	unaffected	0	unaffected	unaffected
C16C10.6	chrIII	4166674	4168741	0	unaffected	0	unaffected	unaffected
C16C10.7	chrIII	4164245	4166821	0	unaffected	0	unaffected	unaffected
C16C10.8	chrIII	4161921	4164147	0	unaffected	0	unaffected	unaffected
C16C10.9	chrIII	4155361	4157368	0	unaffected	0	unaffected	unaffected
C16C2.1	chrI	9727194	9728012	0	unaffected	0	unaffected	unaffected
C16C2.2	chrI	9722540	9726281	0	unaffected	0	unaffected	unaffected
C16C2.3	chrI	9715312	9728099	0	unaffected	0	unaffected	unaffected
C16C2.4	chrI	9712813	9715223	0	unaffected	0	unaffected	unaffected
C16C4.12	chrII	1885443	1886484	0	unaffected	0	unaffected	unaffected
C16C4.13	chrII	1887213	1889176	0	unaffected	0	unaffected	unaffected
C16C4.15	chrII	1871552	1873266	0	unaffected	0	unaffected	unaffected
C16C4.17	chrII	1864736	1864889	0	unaffected	0	unaffected	unaffected
[truncated: 16,162 more rows]

## Sheet: sp117
gene_ID	chr	start	stop	CNV_overlap	CNV_type	CNV_overlap_10kb	CNV_type.10kb	CNV_size
B0244.10	chrIII	5733950	5737469	0.417164	deletion	0.417164	deletion	greater than 10kb
B0244.4	chrIII	5747438	5751562	0.136275	deletion	0.136275	deletion	greater than 10kb
B0244.5	chrIII	5744832	5747149	1	deletion	1	deletion	greater than 10kb
B0244.6	chrIII	5737961	5744774	1	deletion	1	deletion	greater than 10kb
C01B4.1	chrV	2517528	2521770	1	deletion	1	deletion	greater than 10kb
C01B4.6	chrV	2501049	2502425	1	deletion	1	deletion	greater than 10kb
C01B4.9	chrV	2483002	2487784	1	deletion	1	deletion	greater than 10kb
C09D1.1	chrI	4035745	4090963	0.235412	deletion	0.235412	deletion	greater than 10kb
C13B7.6	chrV	2421865	2422894	1	deletion	1	deletion	greater than 10kb
F11C3.1	chrI	14867912	14871354	1	deletion	1	deletion	greater than 10kb
F11C3.2	chrI	14872150	14875367	1	deletion	1	deletion	greater than 10kb
F11C3.3	chrI	14852480	14863529	0.138293	deletion	0.138293	deletion	greater than 10kb
F21F12.1	chrI	14913611	14915560	1	deletion	1	deletion	greater than 10kb
F31C3.1	chrI	15040415	15041270	1	deletion	1	deletion	greater than 10kb
F31C3.2	chrI	15036361	15040476	1	deletion	1	deletion	greater than 10kb
F31C3.3	chrI	15041420	15050691	1	deletion	1	deletion	greater than 10kb
F31C3.4	chrI	15050785	15052409	1	deletion	1	deletion	greater than 10kb
F31C3.5	chrI	15053013	15053659	1	deletion	1	deletion	greater than 10kb
F31C3.6	chrI	15053115	15058992	1	deletion	1	deletion	greater than 10kb
F33H2.1	chrI	15016888	15022969	1	deletion	1	deletion	greater than 10kb
F33H2.2	chrI	15023128	15027750	1	deletion	1	deletion	greater than 10kb
F33H2.3	chrI	15034505	15035456	1	deletion	1	deletion	greater than 10kb
F33H2.5	chrI	15005596	15013863	1	deletion	1	deletion	greater than 10kb
F33H2.6	chrI	15014839	15016584	1	deletion	1	deletion	greater than 10kb
F33H2.7	chrI	15027488	15030543	1	deletion	1	deletion	greater than 10kb
F33H2.8	chrI	15031129	15033028	1	deletion	1	deletion	greater than 10kb
F54A3.2	chrII	2243655	2254374	0.59194	deletion	0.59194	deletion	greater than 10kb
F54A3.3	chrII	2233544	2243576	1	deletion	1	deletion	greater than 10kb
F54A3.4	chrII	2220004	2223545	0.153629	deletion	0.153629	deletion	greater than 10kb
F54A3.5	chrII	2224361	2225715	1	deletion	1	deletion	greater than 10kb
F54A3.6	chrII	2225823	2232475	1	deletion	1	deletion	greater than 10kb
F54E2.3	chrV	2781480	2801025	0.511589	deletion	0.511589	deletion	greater than 10kb
F56A4.12	chrV	2476903	2481662	1	deletion	1	deletion	greater than 10kb
F56A4.3	chrV	2453412	2456146	1	deletion	1	deletion	greater than 10kb
R31.1	chrV	11899544	11916604	0.761958	deletion	0.761958	deletion	greater than 10kb
T21E12.4	chrI	4386787	4403645	0.889726	deletion	0.889726	deletion	greater than 10kb
W03B1.8	chrIV	4342022	4346551	0.783837	deletion	0.783837	deletion	greater than 10kb
W03B1.9	chrIV	4352610	4356972	0.777166	deletion	0.777166	deletion	greater than 10kb
Y110A2AL.1	chrII	2875104	2876769	1	deletion	1	deletion	greater than 10kb
Y110A2AL.10	chrII	2871381	2871919	1	deletion	1	deletion	greater than 10kb
Y110A2AL.12	chrII	2878914	2884900	1	deletion	1	deletion	greater than 10kb
Y110A2AL.13	chrII	2886381	2889009	1	deletion	1	deletion	greater than 10kb
Y110A2AL.14	chrII	2889107	2894401	0.357575	deletion	0.357575	deletion	greater than 10kb
Y19D10A.11	chrV	2368942	2373701	1	deletion	1	deletion	greater than 10kb
Y19D10A.12	chrV	2375041	2379504	1	deletion	1	deletion	greater than 10kb
Y19D10A.7	chrV	2348213	2350324	1	deletion	1	deletion	greater than 10kb
Y34D9A.10	chrI	1053923	1066904	0.545181	deletion	0.545181	deletion	greater than 10kb
Y34D9A.3	chrI	1034474	1040871	1	deletion	1	deletion	greater than 10kb
Y34D9A.6	chrI	1049596	1050729	1	deletion	1	deletion	greater than 10kb
Y34D9A.7	chrI	1041486	1048562	1	deletion	1	deletion	greater than 10kb
Y34D9A.8	chrI	1019578	1053648	0.576666	deletion	0.576666	deletion	greater than 10kb
Y38E10A.5	chrII	12578352	12581003	0.000754432	deletion	0.000754432	deletion	greater than 10kb
Y38E10A.6	chrII	12582110	12603615	1	deletion	1	deletion	greater than 10kb
Y38H6A.2	chrV	20329702	20331125	1	deletion	1	deletion	greater than 10kb
Y38H6A.5	chrV	20334141	20335329	1	deletion	1	deletion	greater than 10kb
Y39A3B.1	chrIII	2006018	2009186	0.309975	deletion	0.309975	deletion	greater than 10kb
Y39A3B.2	chrIII	1997830	2002428	1	deletion	1	deletion	greater than 10kb
Y39A3B.3	chrIII	1985098	1987456	1	deletion	1	deletion	greater than 10kb
Y39B6A.1	chrV	19200983	19203580	0.00654601	deletion	0.00654601	deletion	greater than 10kb
Y39B6A.10	chrV	19131501	19133545	1	deletion	1	deletion	greater than 10kb
Y39B6A.11	chrV	19127500	19130953	1	deletion	1	deletion	greater than 10kb
Y39B6A.12	chrV	19119493	19124879	1	deletion	1	deletion	greater than 10kb
Y39B6A.13	chrV	19118481	19119338	1	deletion	1	deletion	greater than 10kb
Y39B6A.14	chrV	19102416	19118383	1	deletion	1	deletion	greater than 10kb
Y39B6A.16	chrV	19099055	19101079	1	deletion	1	deletion	greater than 10kb
Y39B6A.17	chrV	19076560	19082560	1	deletion	1	deletion	greater than 10kb
Y39B6A.18	chrV	19068591	19074057	0.193194	deletion	0.193194	deletion	greater than 10kb
Y39B6A.2	chrV	19190515	19198894	1	deletion	1	deletion	greater than 10kb
Y39B6A.3	chrV	19189211	19189989	1	deletion	1	deletion	greater than 10kb
Y39B6A.47	chrV	19087685	19092632	1	deletion	1	deletion	greater than 10kb
Y39B6A.48	chrV	19174776	19187870	1	deletion	1	deletion	greater than 10kb
Y39B6A.5	chrV	19157629	19158791	1	deletion	1	deletion	greater than 10kb
Y39B6A.50	chrV	19089605	19089782	1	deletion	1	deletion	greater than 10kb
Y39B6A.6	chrV	19154076	19157676	1	deletion	1	deletion	greater than 10kb
Y39B6A.69	chrV	19152249	19152399	1	deletion	1	deletion	greater than 10kb
Y39B6A.7	chrV	19145696	19149118	1	deletion	1	deletion	greater than 10kb
Y39B6A.8	chrV	19140765	19145513	1	deletion	1	deletion	greater than 10kb
Y39B6A.9	chrV	19136479	19139021	1	deletion	1	deletion	greater than 10kb
Y45G12C.16	chrV	2530144	2531173	1	deletion	1	deletion	greater than 10kb
Y45G12C.2	chrV	2561688	2564707	0.434581	deletion	0.434581	deletion	greater than 10kb
Y48E1B.1	chrII	13542764	13547559	1	deletion	1	deletion	greater than 10kb
Y48E1B.14	chrII	13522848	13531150	0.0179475	deletion	0.0179475	deletion	greater than 10kb
Y48E1B.2	chrII	13533474	13541014	1	deletion	1	deletion	greater than 10kb
Y48E1B.3	chrII	13547178	13567929	1	deletion	1	deletion	greater than 10kb
Y48E1B.5	chrII	13568011	13574993	1	deletion	1	deletion	greater than 10kb
Y48E1B.7	chrII	13575386	13584662	0.928633	deletion	0.928633	deletion	greater than 10kb
Y54E10BL.3	chrI	3003528	3005943	1	deletion	1	deletion	greater than 10kb
Y54E10BL.4	chrI	2996407	3001380	1	deletion	1	deletion	greater than 10kb
Y54E10BL.5	chrI	3001348	3002851	1	deletion	1	deletion	greater than 10kb
Y54E10BL.6	chrI	3005428	3013450	0.569933	deletion	0.569933	deletion	greater than 10kb
Y54G2A.17	chrIV	2872221	2890447	0.481675	deletion	0.481675	deletion	greater than 10kb
Y54G9A.3	chrII	13696276	13712828	0.768729	deletion	0.768729	deletion	greater than 10kb
Y71F9AR.2	chrI	2983264	2985169	1	deletion	1	deletion	greater than 10kb
Y71F9AR.3	chrI	2986108	2995915	1	deletion	1	deletion	greater than 10kb
Y71F9AR.4	chrI	2981652	2983074	1	deletion	1	deletion	greater than 10kb
Y71H2AL.1	chrIII	2681436	2686455	0.0904563	deletion	0.0904563	deletion	greater than 10kb
Y71H2AL.2	chrIII	2686782	2689012	1	deletion	1	deletion	greater than 10kb
Y71H2AM.10	chrIII	2707667	2715114	0.044716	deletion	0.044716	deletion	greater than 10kb
Y71H2AM.8	chrIII	2700932	2707049	1	deletion	1	deletion	greater than 10kb
Y71H2AM.9	chrIII	2690072	2698809	1	deletion	1	deletion	greater than 10kb
Y73B3A.3	chrX	84042	93664	1	deletion	1	deletion	greater than 10kb
Y73B3A.4	chrX	96341	104777	1	deletion	1	deletion	greater than 10kb
Y73B3A.5	chrX	106970	109378	0.843023	deletion	0.843023	deletion	greater than 10kb
Y95B8A.10	chrI	873483	882716	0.164302	deletion	0.164302	deletion	greater than 10kb
Y95B8A.11	chrI	889934	895102	1	deletion	1	deletion	greater than 10kb
Y95B8A.4	chrI	907467	911198	0.142857	deletion	0.142857	deletion	greater than 10kb
Y95B8A.5	chrI	897286	906007	1	deletion	1	deletion	greater than 10kb
Y95B8A.6	chrI	882920	890210	0.165844	deletion	0.165844	deletion	greater than 10kb
Y95B8A.7	chrI	853562	871950	1	deletion	1	deletion	greater than 10kb
Y95B8A.8	chrI	853453	854134	1	deletion	1	deletion	greater than 10kb
ZK270.1	chrI	14909228	14913112	1	deletion	1	deletion	greater than 10kb
ZK270.2	chrI	14875752	14900319	0.633614	deletion	0.633614	deletion	greater than 10kb
ZK337.1	chrI	14993809	15001669	1	deletion	1	deletion	greater than 10kb
ZK337.2	chrI	14975407	14980575	1	deletion	1	deletion	greater than 10kb
ZK337.4	chrI	14984166	14987647	1	deletion	1	deletion	greater than 10kb
ZK337.5	chrI	15001842	15005600	1	deletion	1	deletion	greater than 10kb
ZK617.1	chrIV	11972684	12010984	0.496057	deletion	0.496057	deletion	greater than 10kb
ZK909.2	chrI	14919519	14952163	1	deletion	1	deletion	greater than 10kb
ZK909.3	chrI	14953476	14955600	1	deletion	1	deletion	greater than 10kb
ZK909.4	chrI	14961489	14965344	1	deletion	1	deletion	greater than 10kb
ZK909.5	chrI	14955635	14957086	1	deletion	1	deletion	greater than 10kb
ZK909.6	chrI	14967287	14968529	1	deletion	1	deletion	greater than 10kb
ZK973.6	chrI	4321095	4359106	0.605062	deletion	0.605062	deletion	greater than 10kb
6R55.2	chrX	17714379	17714756	1	duplication	1	duplication	greater than 10kb
B0302.1	chrX	17186065	17193219	1	duplication	1	duplication	greater than 10kb
B0302.2	chrX	17178464	17178918	1	duplication	1	duplication	greater than 10kb
B0302.4	chrX	17176415	17176703	1	duplication	1	duplication	greater than 10kb
B0302.5	chrX	17193223	17195044	1	duplication	1	duplication	greater than 10kb
B0350.2	chrIV	5966643	6004847	0.571825	duplication	0.571825	duplication	greater than 10kb
B0395.1	chrX	16017446	16021677	1	duplication	1	duplication	greater than 10kb
B0395.2	chrX	16030733	16034744	1	duplication	1	duplication	greater than 10kb
B0395.3	chrX	16034974	16039442	1	duplication	1	duplication	greater than 10kb
B0454.10	chrII	3046221	3048157	1	duplication	1	duplication	greater than 10kb
B0454.2	chrII	3051005	3052325	1	duplication	1	duplication	greater than 10kb
B0454.3	chrII	3048680	3050438	1	duplication	1	duplication	greater than 10kb
B0454.4	chrII	3044325	3046118	1	duplication	1	duplication	greater than 10kb
B0454.5	chrII	3038861	3040825	1	duplication	1	duplication	greater than 10kb
B0454.6	chrII	3032782	3036125	0.93449	duplication	0.93449	duplication	greater than 10kb
B0454.7	chrII	3020563	3023434	1	duplication	1	duplication	greater than 10kb
B0454.8	chrII	3040942	3043409	1	duplication	1	duplication	greater than 10kb
B0454.9	chrII	3052377	3054351	1	duplication	1	duplication	greater than 10kb
B0507.1	chrV	8776633	8779271	1	duplication	1	duplication	greater than 10kb
B0507.2	chrV	8774309	8776494	0.683295	duplication	0.683295	duplication	greater than 10kb
C01B7.1	chrV	8786528	8792753	1	duplication	1	duplication	greater than 10kb
C01B7.3	chrV	8783399	8784143	1	duplication	1	duplication	greater than 10kb
C01B7.4	chrV	8792673	8795545	1	duplication	1	duplication	greater than 10kb
C01B7.5	chrV	8800128	8800974	1	duplication	1	duplication	greater than 10kb
C01B7.6	chrV	8805393	8819933	1	duplication	1	duplication	greater than 10kb
C02B4.1	chrX	12678759	12689207	1	duplication	1	duplication	greater than 10kb
C02B4.2	chrX	12663723	12667782	1	duplication	1	duplication	greater than 10kb
C02B4.4	chrX	12662402	12663553	1	duplication	1	duplication	greater than 10kb
C02C6.1	chrX	15568847	15573627	1	duplication	1	duplication	greater than 10kb
C02C6.2	chrX	15537593	15546646	1	duplication	1	duplication	greater than 10kb
C02C6.3	chrX	15546638	15552165	1	duplication	1	duplication	greater than 10kb
C02D4.1	chrX	15284137	15286158	1	duplication	1	duplication	greater than 10kb
C02D4.2	chrX	15286509	15302894	1	duplication	1	duplication	greater than 10kb
C03H12.1	chrX	15689389	15696355	1	duplication	1	duplication	greater than 10kb
C04A11.1	chrX	13660448	13662893	1	duplication	1	duplication	greater than 10kb
C04A11.2	chrX	13665886	13668742	1	duplication	1	duplication	greater than 10kb
C04A11.3	chrX	13677121	13682008	1	duplication	1	duplication	greater than 10kb
C04A11.4	chrX	13687902	13695721	1	duplication	1	duplication	greater than 10kb
C04A11.5	chrX	13664516	13665310	1	duplication	1	duplication	greater than 10kb
C04B4.1	chrX	12280638	12282491	1	duplication	1	duplication	greater than 10kb
C04B4.2	chrX	12283232	12285246	1	duplication	1	duplication	greater than 10kb
C04B4.4	chrX	12289910	12293199	1	duplication	1	duplication	greater than 10kb
C04B4.6	chrX	12274973	12275609	1	duplication	1	duplication	greater than 10kb
C04C11.1	chrX	14020716	14022340	1	duplication	1	duplication	greater than 10kb
C04C11.2	chrX	14033724	14037384	1	duplication	1	duplication	greater than 10kb
C05E7.1	chrX	12941370	12943477	1	duplication	1	duplication	greater than 10kb
C05E7.2	chrX	12938626	12940641	1	duplication	1	duplication	greater than 10kb
C05E7.3	chrX	12945545	12946492	1	duplication	1	duplication	greater than 10kb
C05E7.4	chrX	12965414	12968386	1	duplication	1	duplication	greater than 10kb
C05G5.1	chrX	14734376	14740019	1	duplication	1	duplication	greater than 10kb
C05G5.2	chrX	14747250	14750321	1	duplication	1	duplication	greater than 10kb
C05G5.3	chrX	14750787	14751942	1	duplication	1	duplication	greater than 10kb
C05G5.4	chrX	14753954	14756390	1	duplication	1	duplication	greater than 10kb
C05G5.5	chrX	14756005	14760894	1	duplication	1	duplication	greater than 10kb
C05G5.7	chrX	14743600	14743711	1	duplication	1	duplication	greater than 10kb
C06G1.1	chrX	16633289	16637560	1	duplication	1	duplication	greater than 10kb
C06G1.2	chrX	16621737	16622666	1	duplication	1	duplication	greater than 10kb
C06G1.4	chrX	16613375	16617594	1	duplication	1	duplication	greater than 10kb
C06G1.5	chrX	16638171	16642988	1	duplication	1	duplication	greater than 10kb
C06G1.6	chrX	16652031	16654410	1	duplication	1	duplication	greater than 10kb
C08A9.1	chrX	17092643	17094149	1	duplication	1	duplication	greater than 10kb
C08A9.10	chrX	17081028	17081970	1	duplication	1	duplication	greater than 10kb
C08A9.3	chrX	17087807	17093225	1	duplication	1	duplication	greater than 10kb
C08A9.6	chrX	17094208	17096463	1	duplication	1	duplication	greater than 10kb
C08A9.7	chrX	17099037	17100678	1	duplication	1	duplication	greater than 10kb
C08A9.8	chrX	17102770	17104797	1	duplication	1	duplication	greater than 10kb
C08A9.9	chrX	17106531	17108296	1	duplication	1	duplication	greater than 10kb
C09D1.2	chrI	4071800	4072850	0.190476	duplication	0.190476	duplication	greater than 10kb
C09G1.1	chrX	15966040	15972229	1	duplication	1	duplication	greater than 10kb
C09G1.2	chrX	15977690	15982529	1	duplication	1	duplication	greater than 10kb
C09G1.3	chrX	15986091	15987523	1	duplication	1	duplication	greater than 10kb
C09G1.4	chrX	15987900	15996865	1	duplication	1	duplication	greater than 10kb
C09G1.5	chrX	15959028	15962250	1	duplication	1	duplication	greater than 10kb
C10E2.1	chrX	16763635	16766583	1	duplication	1	duplication	greater than 10kb
C10E2.2	chrX	16745665	16748135	1	duplication	1	duplication	greater than 10kb
C10E2.3	chrX	16729485	16744625	1	duplication	1	duplication	greater than 10kb
C10E2.4	chrX	16749681	16751037	1	duplication	1	duplication	greater than 10kb
C10E2.5	chrX	16751790	16753600	1	duplication	1	duplication	greater than 10kb
C10E2.6	chrX	16767106	16770427	1	duplication	1	duplication	greater than 10kb
C11G10.1	chrX	15157287	15158547	1	duplication	1	duplication	greater than 10kb
C11G10.2	chrX	15141934	15142334	1	duplication	1	duplication	greater than 10kb
C11G6.1	chrX	16332367	16335868	1	duplication	1	duplication	greater than 10kb
C11G6.2	chrX	16329144	16329925	1	duplication	1	duplication	greater than 10kb
C11G6.3	chrX	16340640	16345955	1	duplication	1	duplication	greater than 10kb
C11G6.4	chrX	16354903	16359582	1	duplication	1	duplication	greater than 10kb
C11H1.2	chrX	14304862	14307697	1	duplication	1	duplication	greater than 10kb
C11H1.3	chrX	14307792	14311613	1	duplication	1	duplication	greater than 10kb
C11H1.4	chrX	14313650	14326730	1	duplication	1	duplication	greater than 10kb
C11H1.5	chrX	14298020	14303070	1	duplication	1	duplication	greater than 10kb
C11H1.7	chrX	14327547	14330125	1	duplication	1	duplication	greater than 10kb
C11H1.8	chrX	14295751	14296586	1	duplication	1	duplication	greater than 10kb
C11H1.9	chrX	14318062	14320328	1	duplication	1	duplication	greater than 10kb
C16D6.1	chrX	12525274	12525714	1	duplication	1	duplication	greater than 10kb
C16D6.2	chrX	12536944	12551608	1	duplication	1	duplication	greater than 10kb
C16H3.1	chrX	17617750	17619382	1	duplication	1	duplication	greater than 10kb
C16H3.2	chrX	17600395	17601428	1	duplication	1	duplication	greater than 10kb
C16H3.3	chrX	17601532	17609972	1	duplication	1	duplication	greater than 10kb
C18B12.2	chrX	15026237	15031014	1	duplication	1	duplication	greater than 10kb
C18B12.3	chrX	15031116	15034471	1	duplication	1	duplication	greater than 10kb
C18B12.4	chrX	15036614	15040532	1	duplication	1	duplication	greater than 10kb
C18B12.5	chrX	15042885	15045065	1	duplication	1	duplication	greater than 10kb
C18B12.6	chrX	15003994	15007238	1	duplication	1	duplication	greater than 10kb
C23H4.1	chrX	12199495	12212981	1	duplication	1	duplication	greater than 10kb
C23H4.2	chrX	12219641	12222663	1	duplication	1	duplication	greater than 10kb
C23H4.3	chrX	12226134	12229810	1	duplication	1	duplication	greater than 10kb
C23H4.4	chrX	12229882	12233023	1	duplication	1	duplication	greater than 10kb
C23H4.6	chrX	12235552	12240731	1	duplication	1	duplication	greater than 10kb
C23H4.7	chrX	12222850	12226008	1	duplication	1	duplication	greater than 10kb
C23H4.8	chrX	12217174	12219256	1	duplication	1	duplication	greater than 10kb
C26G2.1	chrX	14654902	14662791	1	duplication	1	duplication	greater than 10kb
C26G2.2	chrX	14664219	14671231	1	duplication	1	duplication	greater than 10kb
C27C12.1	chrX	14852497	14853685	1	duplication	1	duplication	greater than 10kb
C27C12.2	chrX	14845867	14849177	1	duplication	1	duplication	greater than 10kb
C27C12.3	chrX	14863539	14865775	1	duplication	1	duplication	greater than 10kb
C27C12.4	chrX	14854061	14856452	1	duplication	1	duplication	greater than 10kb
C27C12.5	chrX	14849246	14852764	1	duplication	1	duplication	greater than 10kb
C27C12.6	chrX	14857228	14861732	1	duplication	1	duplication	greater than 10kb
C27C12.7	chrX	14831754	14838118	1	duplication	1	duplication	greater than 10kb
C29F7.1	chrX	13412506	13414545	1	duplication	1	duplication	greater than 10kb
C29F7.2	chrX	13416009	13418152	1	duplication	1	duplication	greater than 10kb
C29F7.3	chrX	13418780	13419841	1	duplication	1	duplication	greater than 10kb
C29F7.4	chrX	13421753	13423343	1	duplication	1	duplication	greater than 10kb
C29F7.5	chrX	13427040	13431528	1	duplication	1	duplication	greater than 10kb
C29F7.6	chrX	13436385	13440943	1	duplication	1	duplication	greater than 10kb
C30E1.2	chrX	16926890	16927950	1	duplication	1	duplication	greater than 10kb
C30E1.3	chrX	16925919	16926748	1	duplication	1	duplication	greater than 10kb
C30E1.4	chrX	16923862	16925727	1	duplication	1	duplication	greater than 10kb
C30E1.5	chrX	16921779	16922788	1	duplication	1	duplication	greater than 10kb
C30E1.6	chrX	16915768	16916750	1	duplication	1	duplication	greater than 10kb
C30E1.8	chrX	16916738	16919246	1	duplication	1	duplication	greater than 10kb
C30F2.1	chrX	16072830	16074780	1	duplication	1	duplication	greater than 10kb
C30F2.2	chrX	16076704	16085142	1	duplication	1	duplication	greater than 10kb
C30F2.3	chrX	16082226	16085655	1	duplication	1	duplication	greater than 10kb
C30F2.4	chrX	16074988	16075596	1	duplication	1	duplication	greater than 10kb
C30F2.5	chrX	16093994	16096365	1	duplication	1	duplication	greater than 10kb
C30G4.2	chrX	17044041	17045424	1	duplication	1	duplication	greater than 10kb
C30G4.3	chrX	17046187	17055480	1	duplication	1	duplication	greater than 10kb
C30G4.4	chrX	17059145	17069134	1	duplication	1	duplication	greater than 10kb
C30G4.5	chrX	17071807	17072114	1	duplication	1	duplication	greater than 10kb
C30G4.6	chrX	17073735	17080324	1	duplication	1	duplication	greater than 10kb
C30G4.7	chrX	17056852	17058462	1	duplication	1	duplication	greater than 10kb
C31E10.1	chrX	13984421	13985623	1	duplication	1	duplication	greater than 10kb
C31E10.3	chrX	13986537	13988940	1	duplication	1	duplication	greater than 10kb
C31E10.4	chrX	13989426	13990111	1	duplication	1	duplication	greater than 10kb
C31E10.5	chrX	13991387	13995765	1	duplication	1	duplication	greater than 10kb
C31E10.6	chrX	13996237	13999282	1	duplication	1	duplication	greater than 10kb
C31E10.7	chrX	14001832	14003000	1	duplication	1	duplication	greater than 10kb
C31E10.8	chrX	14002949	14012526	1	duplication	1	duplication	greater than 10kb
C33A11.1	chrX	15355166	15363795	1	duplication	1	duplication	greater than 10kb
C33A11.2	chrX	15365924	15369931	1	duplication	1	duplication	greater than 10kb
C33A11.4	chrX	15369826	15377616	1	duplication	1	duplication	greater than 10kb
C33E10.1	chrX	17305272	17306233	1	duplication	1	duplication	greater than 10kb
C33E10.10	chrX	17301299	17301849	1	duplication	1	duplication	greater than 10kb
C33E10.2	chrX	17302677	17303945	1	duplication	1	duplication	greater than 10kb
C33E10.5	chrX	17272859	17279458	1	duplication	1	duplication	greater than 10kb
C33E10.8	chrX	17292919	17294464	1	duplication	1	duplication	greater than 10kb
C33G3.1	chrX	14049465	14063860	1	duplication	1	duplication	greater than 10kb
C33G3.3	chrX	14064245	14067915	1	duplication	1	duplication	greater than 10kb
C33G3.4	chrX	14071114	14076226	1	duplication	1	duplication	greater than 10kb
C33G3.5	chrX	14076246	14078605	1	duplication	1	duplication	greater than 10kb
C33G3.6	chrX	14080320	14084256	1	duplication	1	duplication	greater than 10kb
C34E7.1	chrX	12907761	12920061	1	duplication	1	duplication	greater than 10kb
C34E7.3	chrX	12930265	12931955	1	duplication	1	duplication	greater than 10kb
C34E7.4	chrX	12932086	12934907	1	duplication	1	duplication	greater than 10kb
C36E6.1	chrX	17434371	17438007	1	duplication	1	duplication	greater than 10kb
C36E6.2	chrX	17452317	17455782	1	duplication	1	duplication	greater than 10kb
C36E6.3	chrX	17459085	17460705	1	duplication	1	duplication	greater than 10kb
C36E6.5	chrX	17455518	17456520	1	duplication	1	duplication	greater than 10kb
C36E6.8	chrX	17438545	17439623	1	duplication	1	duplication	greater than 10kb
C37E2.1	chrX	14170792	14173994	1	duplication	1	duplication	greater than 10kb
C37E2.2	chrX	14175980	14178402	1	duplication	1	duplication	greater than 10kb
C37E2.3	chrX	14178918	14181636	1	duplication	1	duplication	greater than 10kb
C37E2.4	chrX	14183379	14185528	1	duplication	1	duplication	greater than 10kb
C37E2.5	chrX	14197292	14209084	1	duplication	1	duplication	greater than 10kb
C40C9.1	chrX	13639806	13642186	1	duplication	1	duplication	greater than 10kb
C40C9.2	chrX	13642277	13646828	1	duplication	1	duplication	greater than 10kb
C40C9.3	chrX	13647534	13648264	0.638356	duplication	0.638356	duplication	greater than 10kb
C40C9.4	chrX	13651078	13651667	1	duplication	1	duplication	greater than 10kb
C40C9.5	chrX	13625339	13631047	1	duplication	1	duplication	greater than 10kb
C41H7.1	chrII	3016070	3017474	1	duplication	1	duplication	greater than 10kb
C41H7.2	chrII	3014837	3016925	1	duplication	1	duplication	greater than 10kb
C41H7.3	chrII	3005848	3007510	1	duplication	1	duplication	greater than 10kb
C41H7.4	chrII	3003984	3005600	1	duplication	1	duplication	greater than 10kb
C41H7.5	chrII	3002520	3003803	1	duplication	1	duplication	greater than 10kb
C41H7.6	chrII	3000827	3002414	1	duplication	1	duplication	greater than 10kb
C41H7.7	chrII	3017474	3019790	1	duplication	1	duplication	greater than 10kb
C41H7.8	chrII	3009184	3011575	1	duplication	1	duplication	greater than 10kb
C41H7.9	chrII	3012083	3012236	1	duplication	1	duplication	greater than 10kb
C44H4.1	chrX	14572648	14576037	1	duplication	1	duplication	greater than 10kb
C44H4.2	chrX	14577883	14580846	1	duplication	1	duplication	greater than 10kb
C44H4.3	chrX	14581584	14584299	1	duplication	1	duplication	greater than 10kb
C44H4.4	chrX	14568786	14589018	1	duplication	1	duplication	greater than 10kb
C44H4.5	chrX	14589566	14591894	1	duplication	1	duplication	greater than 10kb
C44H4.6	chrX	14596337	14599090	1	duplication	1	duplication	greater than 10kb
C44H4.7	chrX	14602996	14608590	1	duplication	1	duplication	greater than 10kb
C44H4.8	chrX	14595055	14596267	1	duplication	1	duplication	greater than 10kb
C46E1.2	chrX	15478948	15485632	1	duplication	1	duplication	greater than 10kb
C46E1.3	chrX	15470726	15477334	1	duplication	1	duplication	greater than 10kb
C46G7.3	chrIV	6006342	6008490	1	duplication	1	duplication	greater than 10kb
C49F8.1	chrX	13361131	13365225	1	duplication	1	duplication	greater than 10kb
C49F8.2	chrX	13371469	13376923	1	duplication	1	duplication	greater than 10kb
C49F8.3	chrX	13385990	13387481	1	duplication	1	duplication	greater than 10kb
C52G5.2	chrX	12843243	12845314	1	duplication	1	duplication	greater than 10kb
C52G5.3	chrX	12845740	12846073	1	duplication	1	duplication	greater than 10kb
C53C11.1	chrX	17339832	17342146	1	duplication	1	duplication	greater than 10kb
C53C11.2	chrX	17337165	17338651	1	duplication	1	duplication	greater than 10kb
C53C11.3	chrX	17318509	17326529	1	duplication	1	duplication	greater than 10kb
C53C11.5	chrX	17334048	17335882	1	duplication	1	duplication	greater than 10kb
C53C7.1	chrX	13018778	13021954	1	duplication	1	duplication	greater than 10kb
C53C7.3	chrX	13048488	13050816	1	duplication	1	duplication	greater than 10kb
cTel55X.1	chrX	17714889	17718641	1	duplication	1	duplication	greater than 10kb
D1025.1	chrX	14520692	14522630	1	duplication	1	duplication	greater than 10kb
D1025.10	chrX	14516782	14519005	1	duplication	1	duplication	greater than 10kb
D1025.2	chrX	14514045	14515011	1	duplication	1	duplication	greater than 10kb
D1025.3	chrX	14511177	14514027	1	duplication	1	duplication	greater than 10kb
D1025.4	chrX	14529714	14530139	1	duplication	1	duplication	greater than 10kb
D1025.6	chrX	14523504	14523927	1	duplication	1	duplication	greater than 10kb
D1025.7	chrX	14527100	14527512	1	duplication	1	duplication	greater than 10kb
D1025.8	chrX	14524687	14525111	1	duplication	1	duplication	greater than 10kb
D1025.9	chrX	14528646	14529004	1	duplication	1	duplication	greater than 10kb
E01G6.1	chrX	12260815	12266489	1	duplication	1	duplication	greater than 10kb
E01G6.2	chrX	12256575	12258903	1	duplication	1	duplication	greater than 10kb
E01G6.3	chrX	12241647	12244584	1	duplication	1	duplication	greater than 10kb
E02H4.1	chrX	14271888	14276970	1	duplication	1	duplication	greater than 10kb
E02H4.2	chrX	14278388	14281529	1	duplication	1	duplication	greater than 10kb
E02H4.3	chrX	14284685	14293923	1	duplication	1	duplication	greater than 10kb
E02H4.4	chrX	14257899	14262366	1	duplication	1	duplication	greater than 10kb
E02H4.5	chrX	14253969	14255062	1	duplication	1	duplication	greater than 10kb
E02H4.6	chrX	14250440	14252067	1	duplication	1	duplication	greater than 10kb
E02H4.7	chrX	14256201	14257353	1	duplication	1	duplication	greater than 10kb
E03G2.1	chrX	15926478	15928417	1	duplication	1	duplication	greater than 10kb
E03G2.2	chrX	15929883	15939254	1	duplication	1	duplication	greater than 10kb
E03G2.3	chrX	15943938	15948881	1	duplication	1	duplication	greater than 10kb
E03G2.4	chrX	15952303	15954493	1	duplication	1	duplication	greater than 10kb
F01G12.1	chrX	16395003	16396877	1	duplication	1	duplication	greater than 10kb
F01G12.2	chrX	16376520	16379978	1	duplication	1	duplication	greater than 10kb
F01G12.5	chrX	16380375	16389297	1	duplication	1	duplication	greater than 10kb
F01G12.6	chrX	16399137	16403116	1	duplication	1	duplication	greater than 10kb
F02C12.1	chrX	13402023	13406347	1	duplication	1	duplication	greater than 10kb
F02C12.2	chrX	13398031	13399195	1	duplication	1	duplication	greater than 10kb
F02C12.3	chrX	13396957	13397708	1	duplication	1	duplication	greater than 10kb
F02C12.4	chrX	13391880	13395081	1	duplication	1	duplication	greater than 10kb
F02C12.5	chrX	13406606	13409576	1	duplication	1	duplication	greater than 10kb
F02D10.4	chrX	13456965	13459860	1	duplication	1	duplication	greater than 10kb
F02D10.5	chrX	13452601	13456474	1	duplication	1	duplication	greater than 10kb
F02D10.6	chrX	13449587	13451603	1	duplication	1	duplication	greater than 10kb
F02D10.7	chrX	13444911	13448162	1	duplication	1	duplication	greater than 10kb
F07B7.12	chrV	8854970	8862027	1	duplication	1	duplication	greater than 10kb
F09A5.1	chrX	13130192	13134138	1	duplication	1	duplication	greater than 10kb
F09A5.2	chrX	13135036	13139701	1	duplication	1	duplication	greater than 10kb
F09A5.3	chrX	13141530	13152404	1	duplication	1	duplication	greater than 10kb
F09A5.4	chrX	13152751	13170006	1	duplication	1	duplication	greater than 10kb
F09A5.9	chrX	13139790	13140816	1	duplication	1	duplication	greater than 10kb
F09B12.1	chrX	15101716	15107897	1	duplication	1	duplication	greater than 10kb
F09B12.2	chrX	15097996	15100335	1	duplication	1	duplication	greater than 10kb
F09B12.3	chrX	15095264	15097884	1	duplication	1	duplication	greater than 10kb
F09B12.5	chrX	15084678	15088065	1	duplication	1	duplication	greater than 10kb
F09B12.6	chrX	15089326	15093515	1	duplication	1	duplication	greater than 10kb
F09B12.7	chrX	15093592	15094879	1	duplication	1	duplication	greater than 10kb
F09C8.1	chrX	16159349	16163477	1	duplication	1	duplication	greater than 10kb
F09C8.2	chrX	16140421	16146952	1	duplication	1	duplication	greater than 10kb
F10D7.1	chrX	17359695	17364690	1	duplication	1	duplication	greater than 10kb
F10D7.2	chrX	17364571	17368570	1	duplication	1	duplication	greater than 10kb
F10D7.3	chrX	17372239	17374803	1	duplication	1	duplication	greater than 10kb
F10D7.4	chrX	17378557	17381745	1	duplication	1	duplication	greater than 10kb
F10D7.5	chrX	17382920	17391540	1	duplication	1	duplication	greater than 10kb
F11C1.1	chrX	12987264	12989243	1	duplication	1	duplication	greater than 10kb
F11C1.10	chrX	12977021	12977782	1	duplication	1	duplication	greater than 10kb
F11C1.2	chrX	12985719	12987149	1	duplication	1	duplication	greater than 10kb
F11C1.3	chrX	12981744	12985799	1	duplication	1	duplication	greater than 10kb
F11C1.4	chrX	12978434	12979702	1	duplication	1	duplication	greater than 10kb
F11C1.5	chrX	12991376	12999569	1	duplication	1	duplication	greater than 10kb
F11C1.6	chrX	13008423	13013893	1	duplication	1	duplication	greater than 10kb
F11C1.7	chrX	12989423	12990284	1	duplication	1	duplication	greater than 10kb
F11C1.9	chrX	12977173	12977481	1	duplication	1	duplication	greater than 10kb
F11C7.1	chrX	17429095	17433030	1	duplication	1	duplication	greater than 10kb
F11C7.2	chrX	17396743	17397706	1	duplication	1	duplication	greater than 10kb
F11C7.3	chrX	17393715	17396394	1	duplication	1	duplication	greater than 10kb
F11C7.4	chrX	17402479	17413776	1	duplication	1	duplication	greater than 10kb
F11C7.5	chrX	17420141	17421509	1	duplication	1	duplication	greater than 10kb
F11C7.6	chrX	17401392	17402534	1	duplication	1	duplication	greater than 10kb
F11C7.7	chrX	17398554	17399280	1	duplication	1	duplication	greater than 10kb
F12F3.1	chrV	6139818	6143531	1	duplication	1	duplication	greater than 10kb
F14F4.1	chrX	14924962	14928864	1	duplication	1	duplication	greater than 10kb
F14F4.3	chrX	14938181	14946249	1	duplication	1	duplication	greater than 10kb
F15A2.1	chrX	13469386	13470403	1	duplication	1	duplication	greater than 10kb
F15A2.2	chrX	13472086	13475831	1	duplication	1	duplication	greater than 10kb
F15A2.3	chrX	13482579	13484843	1	duplication	1	duplication	greater than 10kb
F15A2.4	chrX	13478552	13481735	1	duplication	1	duplication	greater than 10kb
F15A2.5	chrX	13475841	13477388	1	duplication	1	duplication	greater than 10kb
F15A2.6	chrX	13487493	13500580	1	duplication	1	duplication	greater than 10kb
F16B12.1	chrX	14085438	14089512	1	duplication	1	duplication	greater than 10kb
F16B12.2	chrX	14090319	14095421	1	duplication	1	duplication	greater than 10kb
F16B12.4	chrX	14095673	14098595	1	duplication	1	duplication	greater than 10kb
F16B12.5	chrX	14100485	14101499	1	duplication	1	duplication	greater than 10kb
F16B12.6	chrX	14102289	14107846	1	duplication	1	duplication	greater than 10kb
F16B12.7	chrX	14108475	14109645	1	duplication	1	duplication	greater than 10kb
F16B12.8	chrX	14111193	14113378	1	duplication	1	duplication	greater than 10kb
F16H9.1	chrX	12712579	12728319	1	duplication	1	duplication	greater than 10kb
F16H9.2	chrX	12705552	12808248	1	duplication	1	duplication	greater than 10kb
F17A2.1	chrX	12315471	12317605	1	duplication	1	duplication	greater than 10kb
F17A2.10	chrX	12332026	12333234	1	duplication	1	duplication	greater than 10kb
F17A2.11	chrX	12333573	12335222	1	duplication	1	duplication	greater than 10kb
F17A2.12	chrX	12323670	12325364	1	duplication	1	duplication	greater than 10kb
F17A2.13	chrX	12321597	12322925	1	duplication	1	duplication	greater than 10kb
F17A2.3	chrX	12306926	12309414	1	duplication	1	duplication	greater than 10kb
F17A2.4	chrX	12310743	12312662	1	duplication	1	duplication	greater than 10kb
F17A2.5	chrX	12318090	12320632	1	duplication	1	duplication	greater than 10kb
F17A2.6	chrX	12326655	12328297	1	duplication	1	duplication	greater than 10kb
F17A2.7	chrX	12328907	12330458	1	duplication	1	duplication	greater than 10kb
F17A9.1	chrV	6116503	6117865	1	duplication	1	duplication	greater than 10kb
F17A9.2	chrV	6107810	6114839	1	duplication	1	duplication	greater than 10kb
F17A9.3	chrV	6105657	6107514	1	duplication	1	duplication	greater than 10kb
F17A9.4	chrV	6108943	6110692	1	duplication	1	duplication	greater than 10kb
F17A9.5	chrV	6111003	6112948	1	duplication	1	duplication	greater than 10kb
F17A9.6	chrV	6118314	6120184	1	duplication	1	duplication	greater than 10kb
F17E5.1	chrX	12399449	12413957	1	duplication	1	duplication	greater than 10kb
F17E5.2	chrX	12394196	12399422	1	duplication	1	duplication	greater than 10kb
F17H10.1	chrX	13105122	13108474	1	duplication	1	duplication	greater than 10kb
F17H10.2	chrX	13113866	13116278	1	duplication	1	duplication	greater than 10kb
F17H10.3	chrX	13116285	13122221	1	duplication	1	duplication	greater than 10kb
F17H10.4	chrX	13125905	13126450	1	duplication	1	duplication	greater than 10kb
F18H3.1	chrX	13519592	13521467	1	duplication	1	duplication	greater than 10kb
F18H3.3	chrX	13522187	13527345	1	duplication	1	duplication	greater than 10kb
F18H3.4	chrX	13529015	13531977	1	duplication	1	duplication	greater than 10kb
F18H3.5	chrX	13515784	13518834	1	duplication	1	duplication	greater than 10kb
F19D8.1	chrX	13817930	13821174	1	duplication	1	duplication	greater than 10kb
F19D8.2	chrX	13834358	13836454	1	duplication	1	duplication	greater than 10kb
F19H6.1	chrX	12389525	12391406	1	duplication	1	duplication	greater than 10kb
F19H6.2	chrX	12374160	12375852	1	duplication	1	duplication	greater than 10kb
F19H6.3	chrX	12368383	12371353	1	duplication	1	duplication	greater than 10kb
F19H6.4	chrX	12365619	12367195	1	duplication	1	duplication	greater than 10kb
F19H6.5	chrX	12363644	12364836	1	duplication	1	duplication	greater than 10kb
F19H6.6	chrX	12362328	12363042	1	duplication	1	duplication	greater than 10kb
F19H6.7	chrX	12377765	12378282	1	duplication	1	duplication	greater than 10kb
F20B4.6	chrX	17695155	17701668	1	duplication	1	duplication	greater than 10kb
F20D1.1	chrX	14968832	14970203	1	duplication	1	duplication	greater than 10kb
F20D1.10	chrX	14979303	14980068	1	duplication	1	duplication	greater than 10kb
F20D1.2	chrX	14970680	14974706	1	duplication	1	duplication	greater than 10kb
F20D1.3	chrX	14976044	14978651	1	duplication	1	duplication	greater than 10kb
F20D1.4	chrX	14982069	14982734	1	duplication	1	duplication	greater than 10kb
F20D1.6	chrX	14983454	14987298	1	duplication	1	duplication	greater than 10kb
F20D1.7	chrX	14987298	14991310	1	duplication	1	duplication	greater than 10kb
F20D1.8	chrX	14994677	14999057	1	duplication	1	duplication	greater than 10kb
F20D1.9	chrX	15002015	15003878	1	duplication	1	duplication	greater than 10kb
F21D9.8	chrV	19279301	19279959	1	duplication	1	deletion	NA
F22E10.1	chrX	12731779	12737362	1	duplication	1	duplication	greater than 10kb
F22E10.2	chrX	12738925	12744305	1	duplication	1	duplication	greater than 10kb
F22E10.3	chrX	12744651	12749510	1	duplication	1	duplication	greater than 10kb
F22E10.5	chrX	12762014	12765852	1	duplication	1	duplication	greater than 10kb
F22H10.1	chrX	16702213	16703367	1	duplication	1	duplication	greater than 10kb
F22H10.2	chrX	16678414	16679750	1	duplication	1	duplication	greater than 10kb
F22H10.3	chrX	16677262	16677665	1	duplication	1	duplication	greater than 10kb
F22H10.4	chrX	16684340	16685634	1	duplication	1	duplication	greater than 10kb
F22H10.5	chrX	16686045	16687972	1	duplication	1	duplication	greater than 10kb
F22H10.6	chrX	16689292	16690983	1	duplication	1	duplication	greater than 10kb
F23A7.1	chrX	16217319	16217594	1	duplication	1	duplication	greater than 10kb
F23A7.3	chrX	16219943	16222278	1	duplication	1	duplication	greater than 10kb
F23A7.4	chrX	16212533	16213000	1	duplication	1	duplication	greater than 10kb
F23A7.5	chrX	16229389	16237004	1	duplication	1	duplication	greater than 10kb
F23A7.8	chrX	16213300	16213527	1	duplication	1	duplication	greater than 10kb
F23D12.1	chrX	14425374	14428082	1	duplication	1	duplication	greater than 10kb
F23D12.10	chrX	14413546	14415676	1	duplication	1	duplication	greater than 10kb
F23D12.11	chrX	14423802	14424679	1	duplication	1	duplication	greater than 10kb
F23D12.2	chrX	14416047	14421402	1	duplication	1	duplication	greater than 10kb
F23D12.3	chrX	14442550	14443300	1	duplication	1	duplication	greater than 10kb
F23D12.4	chrX	14444931	14446054	1	duplication	1	duplication	greater than 10kb
F23D12.5	chrX	14448153	14453492	1	duplication	1	duplication	greater than 10kb
F23D12.6	chrX	14423334	14423808	1	duplication	1	duplication	greater than 10kb
F23D12.7	chrX	14453489	14453776	1	duplication	1	duplication	greater than 10kb
F23D12.8	chrX	14434141	14435293	1	duplication	1	duplication	greater than 10kb
F28H6.1	chrX	14147630	14152013	1	duplication	1	duplication	greater than 10kb
F28H6.2	chrX	14141874	14144427	1	duplication	1	duplication	greater than 10kb
F28H6.3	chrX	14138030	14140001	1	duplication	1	duplication	greater than 10kb
F28H6.4	chrX	14127811	14133458	1	duplication	1	duplication	greater than 10kb
F28H6.6	chrX	14117018	14125805	1	duplication	1	duplication	greater than 10kb
F28H6.8	chrX	14133826	14134275	1	duplication	1	duplication	greater than 10kb
F31A3.1	chrX	17553343	17554374	1	duplication	1	duplication	greater than 10kb
F31A3.2	chrX	17550981	17551802	1	duplication	1	duplication	greater than 10kb
F31A3.3	chrX	17532860	17533991	1	duplication	1	duplication	greater than 10kb
F31A3.4	chrX	17547741	17548562	1	duplication	1	duplication	greater than 10kb
F31A3.5	chrX	17554869	17561389	1	duplication	1	duplication	greater than 10kb
F31B9.1	chrX	15910567	15914089	1	duplication	1	duplication	greater than 10kb
F31B9.2	chrX	15918066	15920353	1	duplication	1	duplication	greater than 10kb
F31B9.3	chrX	15923667	15924679	1	duplication	1	duplication	greater than 10kb
F31F6.1	chrX	14867031	14868231	1	duplication	1	duplication	greater than 10kb
F31F6.2	chrX	14868944	14870606	1	duplication	1	duplication	greater than 10kb
F31F6.3	chrX	14871766	14872792	1	duplication	1	duplication	greater than 10kb
F31F6.4	chrX	14881349	14882231	1	duplication	1	duplication	greater than 10kb
F31F6.5	chrX	14888417	14894257	1	duplication	1	duplication	greater than 10kb
F31F6.6	chrX	14895075	14898372	1	duplication	1	duplication	greater than 10kb
F31F6.7	chrX	14898435	14900703	1	duplication	1	duplication	greater than 10kb
F31F6.8	chrX	14876095	14878650	1	duplication	1	duplication	greater than 10kb
F33C8.1	chrX	14710404	14718713	1	duplication	1	duplication	greater than 10kb
F33C8.2	chrX	14721327	14723367	1	duplication	1	duplication	greater than 10kb
F33C8.3	chrX	14726555	14729412	1	duplication	1	duplication	greater than 10kb
F33C8.4	chrX	14732212	14734388	1	duplication	1	duplication	greater than 10kb
F35B3.1	chrX	17015223	17017741	1	duplication	1	duplication	greater than 10kb
F35B3.4	chrX	17019542	17020732	1	duplication	1	duplication	greater than 10kb
F35B3.5	chrX	17021738	17030146	1	duplication	1	duplication	greater than 10kb
F35B3.7	chrX	17035123	17042882	1	duplication	1	duplication	greater than 10kb
F38E9.1	chrX	16471298	16474925	1	duplication	1	duplication	greater than 10kb
F38E9.2	chrX	16457318	16471867	1	duplication	1	duplication	greater than 10kb
F38E9.4	chrX	16451869	16452487	1	duplication	1	duplication	greater than 10kb
F38E9.5	chrX	16446124	16451274	1	duplication	1	duplication	greater than 10kb
F38E9.6	chrX	16439090	16441018	1	duplication	1	duplication	greater than 10kb
F39B1.1	chrX	15234762	15246296	1	duplication	1	duplication	greater than 10kb
F39B3.2	chrX	17567555	17579804	1	duplication	1	duplication	greater than 10kb
F39D8.1	chrX	15409105	15415424	1	duplication	1	duplication	greater than 10kb
F39D8.2	chrX	15407843	15419221	1	duplication	1	duplication	greater than 10kb
F39D8.3	chrX	15422424	15425049	1	duplication	1	duplication	greater than 10kb
F39D8.4	chrX	15425204	15428021	1	duplication	1	duplication	greater than 10kb
F39F10.2	chrX	16894810	16895843	1	duplication	1	duplication	greater than 10kb
F39F10.3	chrX	16891917	16893075	1	duplication	1	duplication	greater than 10kb
F39F10.4	chrX	16902317	16904259	1	duplication	1	duplication	greater than 10kb
F40E10.1	chrX	14696341	14699907	1	duplication	1	duplication	greater than 10kb
F40E10.2	chrX	14690763	14692926	1	duplication	1	duplication	greater than 10kb
F40E10.3	chrX	14684805	14688296	1	duplication	1	duplication	greater than 10kb
F40E10.4	chrX	14674249	14683257	1	duplication	1	duplication	greater than 10kb
F40E10.5	chrX	14701720	14703614	1	duplication	1	duplication	greater than 10kb
F40E10.6	chrX	14703629	14706789	1	duplication	1	duplication	greater than 10kb
F41G4.1	chrX	16841031	16842902	1	duplication	1	duplication	greater than 10kb
F41G4.2	chrX	16807384	16813600	1	duplication	1	duplication	greater than 10kb
F41G4.3	chrX	16816186	16819195	1	duplication	1	duplication	greater than 10kb
F41G4.4	chrX	16829469	16830594	1	duplication	1	duplication	greater than 10kb
F41G4.5	chrX	16830917	16832667	1	duplication	1	duplication	greater than 10kb
F41G4.7	chrX	16833514	16836331	1	duplication	1	duplication	greater than 10kb
F41G4.8	chrX	16843280	16844921	1	duplication	1	duplication	greater than 10kb
F42D1.2	chrX	14790936	14792912	1	duplication	1	duplication	greater than 10kb
F42D1.3	chrX	14800050	14804288	1	duplication	1	duplication	greater than 10kb
F42D1.4	chrX	14807166	14807875	1	duplication	1	duplication	greater than 10kb
F42F12.11	chrX	12346960	12347831	1	duplication	1	duplication	greater than 10kb
F42F12.14	chrX	12348496	12350265	1	duplication	1	duplication	greater than 10kb
F42F12.2	chrX	12340310	12341362	1	duplication	1	duplication	greater than 10kb
F42F12.3	chrX	12350519	12351678	1	duplication	1	duplication	greater than 10kb
F42F12.4	chrX	12351909	12352909	1	duplication	1	duplication	greater than 10kb
F42F12.7	chrX	12358542	12359029	1	duplication	1	duplication	greater than 10kb
F42F12.9	chrX	12343545	12343975	1	duplication	1	duplication	greater than 10kb
F43B10.1	chrX	16660969	16663121	1	duplication	1	duplication	greater than 10kb
F43B10.2	chrX	16665042	16674659	1	duplication	1	duplication	greater than 10kb
F43G9.6	chrI	8623010	8631178	0.855779	duplication	0.855779	duplication	greater than 10kb
F45B8.1	chrX	14964512	14965863	1	duplication	1	duplication	greater than 10kb
F45B8.2	chrX	14962828	14964127	1	duplication	1	duplication	greater than 10kb
F45B8.3	chrX	14960519	14961462	1	duplication	1	duplication	greater than 10kb
F45B8.4	chrX	14951129	14954451	1	duplication	1	duplication	greater than 10kb
F45E6.1	chrX	12475590	12477373	1	duplication	1	duplication	greater than 10kb
F45E6.2	chrX	12480879	12484829	1	duplication	1	duplication	greater than 10kb
F45E6.3	chrX	12484985	12491089	1	duplication	1	duplication	greater than 10kb
F45E6.4	chrX	12492795	12495793	1	duplication	1	duplication	greater than 10kb
F45E6.6	chrX	12502516	12503269	1	duplication	1	duplication	greater than 10kb
F46F2.2	chrX	15269056	15281557	1	duplication	1	duplication	greater than 10kb
F46F2.3	chrX	15259513	15260221	1	duplication	1	duplication	greater than 10kb
F46F2.4	chrX	15257527	15258979	1	duplication	1	duplication	greater than 10kb
F46F2.5	chrX	15262657	15267912	1	duplication	1	duplication	greater than 10kb
F46G10.1	chrX	13309980	13311743	1	duplication	1	duplication	greater than 10kb
F46G10.2	chrX	13323057	13327785	1	duplication	1	duplication	greater than 10kb
F46G10.3	chrX	13331946	13333620	1	duplication	1	duplication	greater than 10kb
F46G10.4	chrX	13334007	13336715	1	duplication	1	duplication	greater than 10kb
F46G10.5	chrX	13337982	13348055	1	duplication	1	duplication	greater than 10kb
F46G10.6	chrX	13349570	13350737	1	duplication	1	duplication	greater than 10kb
F46G10.7	chrX	13328188	13331175	1	duplication	1	duplication	greater than 10kb
F48C11.1	chrX	13191176	13193886	1	duplication	1	duplication	greater than 10kb
F48C11.2	chrX	13182393	13189892	1	duplication	1	duplication	greater than 10kb
F48C11.3	chrX	13177784	13178385	1	duplication	1	duplication	greater than 10kb
F48F7.1	chrX	13949072	13956187	1	duplication	1	duplication	greater than 10kb
F48F7.2	chrX	13960009	13962743	1	duplication	1	duplication	greater than 10kb
F48F7.3	chrX	13963439	13965649	1	duplication	1	duplication	greater than 10kb
F48F7.4	chrX	13965655	13969499	1	duplication	1	duplication	greater than 10kb
F48F7.5	chrX	13975590	13977140	1	duplication	1	duplication	greater than 10kb
F48F7.6	chrX	13977757	13978960	1	duplication	1	duplication	greater than 10kb
F48F7.7	chrX	13979170	13980437	1	duplication	1	duplication	greater than 10kb
F48F7.8	chrX	13980770	13981560	1	duplication	1	duplication	greater than 10kb
F52E10.1	chrX	16275695	16282375	1	duplication	1	duplication	greater than 10kb
F52E10.2	chrX	16282732	16283130	1	duplication	1	duplication	greater than 10kb
F52E10.4	chrX	16286049	16292918	1	duplication	1	duplication	greater than 10kb
F52E10.5	chrX	16267130	16269983	1	duplication	1	duplication	greater than 10kb
F52G3.1	chrX	16963795	16972747	1	duplication	1	duplication	greater than 10kb
F52G3.3	chrX	16944803	16947953	1	duplication	1	duplication	greater than 10kb
F52G3.4	chrX	16948281	16952040	1	duplication	1	duplication	greater than 10kb
F52G3.5	chrX	16973153	16976057	1	duplication	1	duplication	greater than 10kb
F53H4.1	chrX	15861223	15865843	1	duplication	1	duplication	greater than 10kb
F53H4.2	chrX	15857087	15857990	1	duplication	1	duplication	greater than 10kb
F53H4.3	chrX	15885646	15887576	1	duplication	1	duplication	greater than 10kb
F53H4.4	chrX	15866341	15868241	1	duplication	1	duplication	greater than 10kb
F53H4.5	chrX	15882030	15885372	1	duplication	1	duplication	greater than 10kb
F53H4.6	chrX	15852865	15860539	1	duplication	1	duplication	greater than 10kb
F54B11.1	chrX	13589964	13591137	1	duplication	1	duplication	greater than 10kb
F54B11.10	chrX	13582131	13582685	1	duplication	1	duplication	greater than 10kb
F54B11.11	chrX	13578712	13581658	1	duplication	1	duplication	greater than 10kb
F54B11.2	chrX	13591427	13592391	1	duplication	1	duplication	greater than 10kb
F54B11.3	chrX	13584704	13589757	1	duplication	1	duplication	greater than 10kb
F54B11.4	chrX	13592547	13593540	1	duplication	1	duplication	greater than 10kb
F54B11.5	chrX	13594053	13595997	1	duplication	1	duplication	greater than 10kb
F54B11.6	chrX	13598400	13599605	1	duplication	1	duplication	greater than 10kb
F54B11.7	chrX	13600365	13601325	1	duplication	1	duplication	greater than 10kb
F54B11.8	chrX	13602129	13603848	1	duplication	1	duplication	greater than 10kb
F54B11.9	chrX	13606884	13608172	1	duplication	1	duplication	greater than 10kb
F54E4.1	chrX	14611334	14624788	1	duplication	1	duplication	greater than 10kb
F54E4.2	chrX	14625515	14628847	1	duplication	1	duplication	greater than 10kb
F54E4.3	chrX	14632022	14636352	1	duplication	1	duplication	greater than 10kb
F54E4.4	chrX	14641321	14645417	1	duplication	1	duplication	greater than 10kb
F55F3.1	chrX	13755700	13759323	1	duplication	1	duplication	greater than 10kb
F55F3.2	chrX	13760221	13763925	1	duplication	1	duplication	greater than 10kb
F55F3.3	chrX	13765284	13770494	1	duplication	1	duplication	greater than 10kb
F55F3.4	chrX	13785504	13789170	1	duplication	1	duplication	greater than 10kb
F57G12.1	chrX	12169029	12171615	1	duplication	1	duplication	greater than 10kb
F57G12.2	chrX	12156402	12159971	1	duplication	1	duplication	greater than 10kb
F59C12.1	chrX	16595162	16601969	1	duplication	1	duplication	greater than 10kb
F59C12.2	chrX	16579671	16587389	1	duplication	1	duplication	greater than 10kb
F59C12.3	chrX	16603312	16609451	1	duplication	1	duplication	greater than 10kb
F59C12.4	chrX	16602371	16602644	1	duplication	1	duplication	greater than 10kb
F59D12.1	chrX	15666692	15672653	1	duplication	1	duplication	greater than 10kb
F59D12.2	chrX	15672779	15675654	1	duplication	1	duplication	greater than 10kb
F59D12.3	chrX	15648194	15650837	1	duplication	1	duplication	greater than 10kb
F59D12.4	chrX	15681657	15687404	1	duplication	1	duplication	greater than 10kb
F59D12.5	chrX	15646310	15647289	1	duplication	1	duplication	greater than 10kb
F59F4.1	chrX	15833982	15838477	1	duplication	1	duplication	greater than 10kb
F59F4.2	chrX	15841502	15842404	1	duplication	1	duplication	greater than 10kb
F59F4.3	chrX	15842288	15847520	1	duplication	1	duplication	greater than 10kb
F59F4.4	chrX	15849830	15851702	1	duplication	1	duplication	greater than 10kb
H01A20.1	chrX	14558431	14561357	1	duplication	1	duplication	greater than 10kb
H03A11.1	chrX	15209221	15213190	1	duplication	1	duplication	greater than 10kb
H03A11.2	chrX	15225799	15230552	1	duplication	1	duplication	greater than 10kb
H03G16.1	chrX	15053812	15054582	1	duplication	1	duplication	greater than 10kb
H03G16.2	chrX	15067405	15069272	1	duplication	1	duplication	greater than 10kb
H03G16.4	chrX	15058438	15060329	1	duplication	1	duplication	greater than 10kb
H03G16.5	chrX	15055429	15056752	1	duplication	1	duplication	greater than 10kb
H03G16.6	chrX	15051617	15052800	1	duplication	1	duplication	greater than 10kb
H06A10.1	chrX	13507495	13510228	1	duplication	1	duplication	greater than 10kb
H08J19.1	chrX	15640893	15644268	1	duplication	1	duplication	greater than 10kb
H11L12.1	chrX	17710409	17711598	1	duplication	1	duplication	greater than 10kb
H13N06.2	chrX	15488051	15491839	1	duplication	1	duplication	greater than 10kb
H13N06.3	chrX	15493467	15497412	1	duplication	1	duplication	greater than 10kb
H13N06.4	chrX	15497486	15500215	1	duplication	1	duplication	greater than 10kb
H13N06.5	chrX	15505965	15507812	1	duplication	1	duplication	greater than 10kb
H13N06.6	chrX	15500187	15504827	1	duplication	1	duplication	greater than 10kb
H13N06.7	chrX	15503335	15505305	1	duplication	1	duplication	greater than 10kb
H18N23.2	chrX	17622635	17640667	1	duplication	1	duplication	greater than 10kb
H19J13.1	chrX	12266843	12270873	1	duplication	1	duplication	greater than 10kb
H20J18.1	chrX	12503817	12513979	1	duplication	1	duplication	greater than 10kb
H30A04.1	chrX	15516586	15523957	1	duplication	1	duplication	greater than 10kb
H36L18.1	chrX	12647046	12651417	1	duplication	1	duplication	greater than 10kb
H36L18.2	chrX	12652516	12653452	1	duplication	1	duplication	greater than 10kb
H40L08.1	chrX	15080708	15084016	1	duplication	1	duplication	greater than 10kb
H40L08.2	chrX	15076614	15077674	1	duplication	1	duplication	greater than 10kb
H40L08.3	chrX	15069642	15076410	1	duplication	1	duplication	greater than 10kb
K02A4.1	chrX	12877409	12880261	1	duplication	1	duplication	greater than 10kb
K02A4.2	chrX	12881157	12884919	1	duplication	1	duplication	greater than 10kb
K02B9.1	chrX	13926964	13929563	1	duplication	1	duplication	greater than 10kb
K02B9.2	chrX	13922575	13926108	1	duplication	1	duplication	greater than 10kb
K02B9.3	chrX	13930829	13931965	1	duplication	1	duplication	greater than 10kb
K02B9.4	chrX	13934814	13941149	1	duplication	1	duplication	greater than 10kb
K02D3.1	chrX	13706857	13707885	1	duplication	1	duplication	greater than 10kb
K02D3.2	chrX	13708651	13711895	1	duplication	1	duplication	greater than 10kb
K02H8.1	chrX	17001657	17008288	1	duplication	1	duplication	greater than 10kb
K03A11.1	chrX	13051726	13055339	1	duplication	1	duplication	greater than 10kb
K03A11.2	chrX	13067425	13068170	1	duplication	1	duplication	greater than 10kb
K03A11.3	chrX	13074612	13076023	1	duplication	1	duplication	greater than 10kb
K03A11.4	chrX	13078102	13081976	1	duplication	1	duplication	greater than 10kb
K03A11.5	chrX	13064212	13066873	1	duplication	1	duplication	greater than 10kb
K03A11.6	chrX	13055790	13058104	1	duplication	1	duplication	greater than 10kb
K04C1.1	chrX	14233874	14235216	1	duplication	1	duplication	greater than 10kb
K04C1.2	chrX	14238638	14241269	1	duplication	1	duplication	greater than 10kb
K04C1.3	chrX	14241499	14243328	1	duplication	1	duplication	greater than 10kb
K04C1.4	chrX	14245662	14246542	1	duplication	1	duplication	greater than 10kb
K04C1.5	chrX	14247982	14249779	1	duplication	1	duplication	greater than 10kb
K04C1.6	chrX	14229598	14230807	1	duplication	1	duplication	greater than 10kb
K04G11.1	chrX	14335427	14336587	1	duplication	1	duplication	greater than 10kb
K04G11.2	chrX	14332723	14340411	1	duplication	1	duplication	greater than 10kb
K04G11.3	chrX	14345213	14347504	1	duplication	1	duplication	greater than 10kb
K04G11.4	chrX	14350069	14352078	1	duplication	1	duplication	greater than 10kb
K04G11.5	chrX	14353218	14358995	1	duplication	1	duplication	greater than 10kb
K05G3.1	chrX	16501258	16501870	1	duplication	1	duplication	greater than 10kb
K05G3.2	chrX	16494856	16499802	1	duplication	1	duplication	greater than 10kb
K05G3.3	chrX	16487405	16489323	1	duplication	1	duplication	greater than 10kb
K06C4.10	chrV	8898172	8898623	1	duplication	1	duplication	greater than 10kb
K06C4.12	chrV	8892536	8892908	1	duplication	1	duplication	greater than 10kb
K06C4.13	chrV	8890015	8890426	1	duplication	1	duplication	greater than 10kb
K06C4.2	chrV	8889465	8889777	1	duplication	1	duplication	greater than 10kb
K06C4.3	chrV	8891860	8892244	1	duplication	1	duplication	greater than 10kb
K06C4.4	chrV	8895078	8895450	1	duplication	1	duplication	greater than 10kb
K06C4.5	chrV	8897502	8897970	1	duplication	1	duplication	greater than 10kb
K06G5.1	chrX	14214869	14219020	1	duplication	1	duplication	greater than 10kb
K06G5.2	chrX	14225503	14228845	1	duplication	1	duplication	greater than 10kb
K06G5.3	chrX	14219498	14223187	1	duplication	1	duplication	greater than 10kb
K08A2.1	chrII	2997023	3000656	1	duplication	1	duplication	greater than 10kb
K08A2.2	chrII	2991615	2994312	1	duplication	1	duplication	greater than 10kb
K08A2.4	chrII	2988309	2991296	1	duplication	1	duplication	greater than 10kb
K08A2.5	chrII	2976641	2986018	0.854964	duplication	0.854964	duplication	greater than 10kb
K08B5.1	chrX	16558370	16562236	1	duplication	1	duplication	greater than 10kb
K08B5.2	chrX	16551092	16553803	1	duplication	1	duplication	greater than 10kb
K08C7.3	chrIV	10666806	10679460	0.98459	duplication	0.98459	duplication	greater than 10kb
K08C7.4	chrIV	10679310	10680455	1	duplication	1	duplication	greater than 10kb
K08C7.5	chrIV	10682503	10684365	0.803974	duplication	0.803974	duplication	greater than 10kb
K08H2.1	chrX	13225762	13226595	1	duplication	1	duplication	greater than 10kb
K08H2.10	chrX	13259182	13260829	1	duplication	1	duplication	greater than 10kb
K08H2.2	chrX	13234029	13234888	1	duplication	1	duplication	greater than 10kb
K08H2.3	chrX	13237352	13238408	1	duplication	1	duplication	greater than 10kb
K08H2.4	chrX	13238581	13239934	1	duplication	1	duplication	greater than 10kb
K08H2.5	chrX	13241039	13242209	1	duplication	1	duplication	greater than 10kb
K08H2.6	chrX	13245320	13246975	1	duplication	1	duplication	greater than 10kb
K08H2.7	chrX	13247193	13248364	1	duplication	1	duplication	greater than 10kb
K08H2.8	chrX	13251894	13256152	1	duplication	1	duplication	greater than 10kb
K08H2.9	chrX	13228436	13232259	1	duplication	1	duplication	greater than 10kb
K09A11.1	chrX	13262430	13264518	1	duplication	1	duplication	greater than 10kb
K09A11.2	chrX	13265011	13267269	1	duplication	1	duplication	greater than 10kb
K09A11.3	chrX	13267535	13269628	1	duplication	1	duplication	greater than 10kb
K09A11.4	chrX	13271807	13274149	1	duplication	1	duplication	greater than 10kb
K09A11.5	chrX	13275245	13278907	1	duplication	1	duplication	greater than 10kb
K09A9.1	chrX	15607900	15611743	1	duplication	1	duplication	greater than 10kb
K09A9.2	chrX	15604696	15606567	1	duplication	1	duplication	greater than 10kb
K09A9.3	chrX	15600996	15603695	1	duplication	1	duplication	greater than 10kb
K09A9.4	chrX	15591299	15595286	1	duplication	1	duplication	greater than 10kb
K09A9.5	chrX	15586744	15590329	1	duplication	1	duplication	greater than 10kb
K09A9.6	chrX	15577401	15586748	1	duplication	1	duplication	greater than 10kb
K09A9.8	chrX	15596146	15596662	1	duplication	1	duplication	greater than 10kb
K09E3.4	chrX	17119194	17120189	1	duplication	1	duplication	greater than 10kb
K09E3.5	chrX	17109345	17110551	1	duplication	1	duplication	greater than 10kb
K09E3.6	chrX	17113890	17115103	1	duplication	1	duplication	greater than 10kb
K09E3.7	chrX	17131272	17134453	1	duplication	1	duplication	greater than 10kb
K09E9.1	chrX	15620420	15626552	1	duplication	1	duplication	greater than 10kb
K09E9.2	chrX	15613736	15616453	1	duplication	1	duplication	greater than 10kb
K09E9.3	chrX	15611755	15613723	1	duplication	1	duplication	greater than 10kb
K09E9.4	chrX	15628730	15630348	1	duplication	1	duplication	greater than 10kb
K09E9.7	chrX	15641345	15642585	1	duplication	1	duplication	greater than 10kb
K11C4.1	chrV	6896980	6898478	1	duplication	1	duplication	greater than 10kb
K11C4.2	chrV	6895069	6896768	1	duplication	1	duplication	greater than 10kb
K11C4.3	chrV	6881325	6891385	0.8334	duplication	0.8334	duplication	greater than 10kb
K11C4.4	chrV	6898522	6900205	1	duplication	1	duplication	greater than 10kb
K11C4.5	chrV	6901668	6929020	1	duplication	1	duplication	greater than 10kb
K11E4.1	chrX	13714087	13716214	1	duplication	1	duplication	greater than 10kb
K11E4.2	chrX	13717520	13719148	1	duplication	1	duplication	greater than 10kb
K11E4.3	chrX	13719137	13722848	1	duplication	1	duplication	greater than 10kb
K11E4.4	chrX	13727228	13734480	1	duplication	1	duplication	greater than 10kb
K11E4.5	chrX	13747246	13751727	1	duplication	1	duplication	greater than 10kb
K11E4.6	chrX	13724594	13725934	1	duplication	1	duplication	greater than 10kb
M03B6.1	chrX	13841541	13843055	1	duplication	1	duplication	greater than 10kb
M03B6.2	chrX	13852830	13857263	1	duplication	1	duplication	greater than 10kb
M03B6.3	chrX	13860692	13864224	1	duplication	1	duplication	greater than 10kb
M03B6.4	chrX	13859037	13872958	1	duplication	1	duplication	greater than 10kb
M03B6.5	chrX	13844130	13844605	1	duplication	1	duplication	greater than 10kb
M153.1	chrX	12146748	12148698	1	duplication	1	duplication	greater than 10kb
M153.2	chrX	12151290	12154021	1	duplication	1	duplication	greater than 10kb
M153.3	chrX	12142833	12143757	1	duplication	1	duplication	greater than 10kb
M153.4	chrX	12150011	12150971	1	duplication	1	duplication	greater than 10kb
M153.5	chrX	12144045	12145872	1	duplication	1	duplication	greater than 10kb
M163.1	chrX	14502415	14503843	1	duplication	1	duplication	greater than 10kb
M163.11	chrX	14479358	14480186	1	duplication	1	duplication	greater than 10kb
M163.2	chrX	14496014	14499364	1	duplication	1	duplication	greater than 10kb
M163.3	chrX	14490036	14491045	1	duplication	1	duplication	greater than 10kb
M163.4	chrX	14480501	14484586	1	duplication	1	duplication	greater than 10kb
M163.5	chrX	14473967	14476083	1	duplication	1	duplication	greater than 10kb
M163.6	chrX	14462786	14464330	1	duplication	1	duplication	greater than 10kb
M163.7	chrX	14464738	14467545	1	duplication	1	duplication	greater than 10kb
M163.8	chrX	14485056	14485884	1	duplication	1	duplication	greater than 10kb
M163.9	chrX	14469576	14469996	1	duplication	1	duplication	greater than 10kb
R01E6.1	chrX	13544751	13550754	1	duplication	1	duplication	greater than 10kb
R01E6.2	chrX	13565416	13566441	1	duplication	1	duplication	greater than 10kb
R01E6.3	chrX	13542501	13544531	1	duplication	1	duplication	greater than 10kb
R01E6.4	chrX	13532850	13536324	1	duplication	1	duplication	greater than 10kb
R01E6.5	chrX	13536980	13538042	1	duplication	1	duplication	greater than 10kb
R01E6.6	chrX	13552270	13556095	1	duplication	1	duplication	greater than 10kb
R01E6.7	chrX	13567370	13569886	1	duplication	1	duplication	greater than 10kb
R03A10.1	chrX	15429853	15431046	1	duplication	1	duplication	greater than 10kb
R03A10.2	chrX	15433728	15435285	1	duplication	1	duplication	greater than 10kb
R03A10.3	chrX	15435614	15441016	1	duplication	1	duplication	greater than 10kb
R03A10.4	chrX	15441661	15443572	1	duplication	1	duplication	greater than 10kb
R03A10.5	chrX	15446660	15450290	1	duplication	1	duplication	greater than 10kb
R03A10.6	chrX	15461774	15470690	1	duplication	1	duplication	greater than 10kb
R03E1.1	chrX	14164568	14169630	1	duplication	1	duplication	greater than 10kb
R03E1.2	chrX	14163028	14164439	1	duplication	1	duplication	greater than 10kb
R03E1.3	chrX	14158800	14161615	1	duplication	1	duplication	greater than 10kb
R03E1.4	chrX	14155045	14156944	1	duplication	1	duplication	greater than 10kb
R03G8.3	chrX	13091061	13094355	1	duplication	1	duplication	greater than 10kb
R03G8.4	chrX	13101236	13104136	1	duplication	1	duplication	greater than 10kb
R03G8.6	chrX	13094488	13100376	1	duplication	1	duplication	greater than 10kb
R04D3.1	chrX	13282026	13284135	1	duplication	1	duplication	greater than 10kb
R04D3.10	chrX	13307212	13308776	1	duplication	1	duplication	greater than 10kb
R04D3.2	chrX	13284985	13286566	1	duplication	1	duplication	greater than 10kb
R04D3.3	chrX	13288843	13290559	1	duplication	1	duplication	greater than 10kb
R04D3.4	chrX	13287690	13288748	1	duplication	1	duplication	greater than 10kb
R04D3.6	chrX	13293345	13294704	1	duplication	1	duplication	greater than 10kb
R04D3.7	chrX	13301529	13303388	1	duplication	1	duplication	greater than 10kb
R04D3.8	chrX	13298924	13300454	1	duplication	1	duplication	greater than 10kb
R04D3.9	chrX	13303835	13305775	1	duplication	1	duplication	greater than 10kb
R05D3.7	chrIII	8351176	8355102	0.464595	duplication	0.464595	duplication	greater than 10kb
R07D5.1	chrX	15121163	15147670	1	duplication	1	duplication	greater than 10kb
R07D5.2	chrX	15109786	15116548	1	duplication	1	duplication	greater than 10kb
R09A8.1	chrX	12612658	12618253	1	duplication	1	duplication	greater than 10kb
R09A8.2	chrX	12619403	12623584	1	duplication	1	duplication	greater than 10kb
R09A8.3	chrX	12624587	12634286	1	duplication	1	duplication	greater than 10kb
R09A8.4	chrX	12636084	12636988	1	duplication	1	duplication	greater than 10kb
R09A8.5	chrX	12638390	12640491	1	duplication	1	duplication	greater than 10kb
R09G11.1	chrX	17528334	17531906	1	duplication	1	duplication	greater than 10kb
R09G11.2	chrX	17518369	17528120	1	duplication	1	duplication	greater than 10kb
R106.1	chrX	17479767	17480235	1	duplication	1	duplication	greater than 10kb
R106.2	chrX	17483264	17486756	1	duplication	1	duplication	greater than 10kb
R11.1	chrX	16189791	16194933	1	duplication	1	duplication	greater than 10kb
R11.2	chrX	16184297	16185328	1	duplication	1	duplication	greater than 10kb
R11.3	chrX	16196838	16199860	1	duplication	1	duplication	greater than 10kb
R11.4	chrX	16210247	16210578	1	duplication	1	duplication	greater than 10kb
R12H7.1	chrX	13212320	13216665	1	duplication	1	duplication	greater than 10kb
R12H7.2	chrX	13218907	13221400	1	duplication	1	duplication	greater than 10kb
R12H7.3	chrX	13223547	13224639	1	duplication	1	duplication	greater than 10kb
R12H7.4	chrX	13217031	13218950	1	duplication	1	duplication	greater than 10kb
R12H7.5	chrX	13222847	13223477	1	duplication	1	duplication	greater than 10kb
T01B4.1	chrX	16299831	16304050	1	duplication	1	duplication	greater than 10kb
T01B4.2	chrX	16306391	16314881	1	duplication	1	duplication	greater than 10kb
T01B4.3	chrX	16315355	16317659	1	duplication	1	duplication	greater than 10kb
T01C8.1	chrX	16796013	16803299	1	duplication	1	duplication	greater than 10kb
T01C8.2	chrX	16786370	16787547	1	duplication	1	duplication	greater than 10kb
T01C8.3	chrX	16780920	16782172	1	duplication	1	duplication	greater than 10kb
T01C8.4	chrX	16787558	16789152	1	duplication	1	duplication	greater than 10kb
T01C8.5	chrX	16791274	16793064	1	duplication	1	duplication	greater than 10kb
T01C8.7	chrX	16803294	16807052	1	duplication	1	duplication	greater than 10kb
T01H10.8	chrX	12128074	12141083	0.851872	duplication	0.851872	duplication	greater than 10kb
T04C10.1	chrX	14819843	14824471	1	duplication	1	duplication	greater than 10kb
T04C10.2	chrX	14815707	14818438	1	duplication	1	duplication	greater than 10kb
T04C10.3	chrX	14812291	14814311	1	duplication	1	duplication	greater than 10kb
T04C10.4	chrX	14809087	14810780	1	duplication	1	duplication	greater than 10kb
T06F4.1	chrX	4056793	4071469	0.0141047	duplication	0.0141047	duplication	greater than 10kb
T07C5.1	chrX	12691537	12695585	1	duplication	1	duplication	greater than 10kb
T07C5.2	chrX	12703258	12704750	1	duplication	1	duplication	greater than 10kb
T07C5.3	chrX	12700448	12701968	1	duplication	1	duplication	greater than 10kb
T07C5.4	chrX	12698875	12699980	1	duplication	1	duplication	greater than 10kb
T07C5.5	chrX	12695516	12697928	1	duplication	1	duplication	greater than 10kb
T08G2.2	chrX	17205354	17209291	1	duplication	1	duplication	greater than 10kb
T08G2.3	chrX	17213066	17214855	1	duplication	1	duplication	greater than 10kb
T10B10.1	chrX	15174968	15176411	1	duplication	1	duplication	greater than 10kb
T10B10.2	chrX	15173831	15178056	1	duplication	1	duplication	greater than 10kb
T10B10.3	chrX	15177983	15181397	1	duplication	1	duplication	greater than 10kb
T10B10.4	chrX	15190052	15193002	1	duplication	1	duplication	greater than 10kb
T10B10.5	chrX	15195832	15199067	1	duplication	1	duplication	greater than 10kb
T10B10.6	chrX	15193044	15194255	1	duplication	1	duplication	greater than 10kb
T10B10.7	chrX	15168670	15173551	1	duplication	1	duplication	greater than 10kb
T10B10.8	chrX	15161212	15166147	1	duplication	1	duplication	greater than 10kb
T14C1.1	chrX	14406106	14411188	1	duplication	1	duplication	greater than 10kb
T14C1.3	chrX	14411347	14412785	1	duplication	1	duplication	greater than 10kb
T14G8.1	chrX	12846359	12852531	1	duplication	1	duplication	greater than 10kb
T14G8.2	chrX	12857948	12859471	1	duplication	1	duplication	greater than 10kb
T14G8.3	chrX	12861166	12869958	1	duplication	1	duplication	greater than 10kb
T14G8.4	chrX	12862083	12863828	1	duplication	1	duplication	greater than 10kb
T18D3.1	chrX	12454676	12457903	1	duplication	1	duplication	greater than 10kb
T18D3.2	chrX	12459000	12461571	1	duplication	1	duplication	greater than 10kb
T18D3.3	chrX	12464579	12466810	1	duplication	1	duplication	greater than 10kb
T18D3.4	chrX	12467231	12475273	1	duplication	1	duplication	greater than 10kb
T18D3.5	chrX	12463749	12464310	1	duplication	1	duplication	greater than 10kb
T18D3.6	chrX	12449848	12451223	1	duplication	1	duplication	greater than 10kb
T18D3.7	chrX	12440692	12443847	1	duplication	1	duplication	greater than 10kb
T18D3.8	chrX	12437415	12438227	1	duplication	1	duplication	greater than 10kb
T18D3.9	chrX	12451006	12454248	1	duplication	1	duplication	greater than 10kb
T20F7.1	chrX	16872852	16878214	1	duplication	1	duplication	greater than 10kb
T20F7.3	chrX	16860322	16861314	1	duplication	1	duplication	greater than 10kb
T20F7.5	chrX	16845302	16861932	1	duplication	1	duplication	greater than 10kb
T20F7.6	chrX	16865994	16868960	1	duplication	1	duplication	greater than 10kb
T20F7.7	chrX	16878074	16880453	1	duplication	1	duplication	greater than 10kb
T21F2.1	chrX	16711607	16720593	1	duplication	1	duplication	greater than 10kb
T21H8.1	chrX	13864969	13873289	1	duplication	1	duplication	greater than 10kb
T21H8.2	chrX	13890924	13893266	1	duplication	1	duplication	greater than 10kb
T21H8.3	chrX	13897865	13900079	1	duplication	1	duplication	greater than 10kb
T21H8.4	chrX	13900995	13903360	1	duplication	1	duplication	greater than 10kb
T21H8.5	chrX	13876434	13880954	1	duplication	1	duplication	greater than 10kb
T22H6.1	chrX	12767392	12769727	1	duplication	1	duplication	greater than 10kb
T22H6.2	chrX	12782325	12787084	1	duplication	1	duplication	greater than 10kb
T22H6.3	chrX	12787590	12789186	1	duplication	1	duplication	greater than 10kb
T22H6.5	chrX	12792778	12793316	1	duplication	1	duplication	greater than 10kb
T22H6.6	chrX	12795133	12813877	1	duplication	1	duplication	greater than 10kb
T22H6.7	chrX	12794106	12794803	1	duplication	1	duplication	greater than 10kb
T23C6.1	chrX	17151445	17154513	1	duplication	1	duplication	greater than 10kb
T23C6.3	chrX	17135935	17138038	1	duplication	1	duplication	greater than 10kb
T23C6.4	chrX	17147456	17149853	1	duplication	1	duplication	greater than 10kb
T23C6.5	chrX	17155013	17157883	1	duplication	1	duplication	greater than 10kb
T23E7.2	chrX	17670952	17680714	1	duplication	1	duplication	greater than 10kb
T23E7.4	chrX	17662375	17664146	1	duplication	1	duplication	greater than 10kb
T23E7.5	chrX	17650101	17651518	1	duplication	1	duplication	greater than 10kb
T23E7.6	chrX	17680834	17682218	1	duplication	1	duplication	greater than 10kb
T24C2.1	chrX	14550067	14556230	1	duplication	1	duplication	greater than 10kb
T24C2.2	chrX	14545784	14546745	1	duplication	1	duplication	greater than 10kb
T24C2.3	chrX	14543486	14544573	1	duplication	1	duplication	greater than 10kb
T24C2.4	chrX	14540615	14541988	1	duplication	1	duplication	greater than 10kb
T24C2.5	chrX	14537659	14539450	1	duplication	1	duplication	greater than 10kb
T24D11.1	chrX	16406134	16413234	1	duplication	1	duplication	greater than 10kb
T24D3.1	chrX	12430541	12431201	1	duplication	1	duplication	greater than 10kb
T24D3.2	chrX	12425733	12426741	1	duplication	1	duplication	greater than 10kb
T24D5.1	chrX	12573999	12577140	1	duplication	1	duplication	greater than 10kb
T24D5.2	chrX	12583729	12586370	1	duplication	1	duplication	greater than 10kb
T24D5.3	chrX	12580004	12583144	1	duplication	1	duplication	greater than 10kb
T24D5.5	chrX	12597961	12599228	1	duplication	1	duplication	greater than 10kb
T24D5.6	chrX	12602959	12603992	1	duplication	1	duplication	greater than 10kb
T25D1.1	chrX	16518063	16522222	1	duplication	1	duplication	greater than 10kb
T25D1.2	chrX	16515491	16517645	1	duplication	1	duplication	greater than 10kb
T25D1.3	chrX	16505174	16507338	1	duplication	1	duplication	greater than 10kb
T25G12.1	chrX	17249002	17249933	1	duplication	1	duplication	greater than 10kb
T25G12.11	chrX	17236845	17237884	1	duplication	1	duplication	greater than 10kb
T25G12.2	chrX	17247387	17248898	1	duplication	1	duplication	greater than 10kb
T25G12.3	chrX	17232755	17234716	1	duplication	1	duplication	greater than 10kb
T25G12.4	chrX	17222400	17224503	1	duplication	1	duplication	greater than 10kb
T25G12.5	chrX	17214943	17217033	1	duplication	1	duplication	greater than 10kb
T25G12.6	chrX	17225160	17229975	1	duplication	1	duplication	greater than 10kb
T25G12.7	chrX	17230644	17235763	1	duplication	1	duplication	greater than 10kb
T27A8.1	chrX	16049800	16054569	1	duplication	1	duplication	greater than 10kb
T27A8.2	chrX	16057651	16059051	1	duplication	1	duplication	greater than 10kb
T27A8.5	chrX	16063787	16066805	1	duplication	1	duplication	greater than 10kb
T27B1.1	chrX	16541256	16551140	1	duplication	1	duplication	greater than 10kb
T27B1.2	chrX	16536761	16540123	1	duplication	1	duplication	greater than 10kb
VB0395L.1	chrX	16013581	16016766	1	duplication	1	duplication	greater than 10kb
VF11C1L.1	chrX	12968477	12975573	1	duplication	1	duplication	greater than 10kb
W01F3.3	chrV	20667179	20678643	0.943911	duplication	0.943911	duplication	greater than 10kb
W06D11.1	chrX	12293698	12295479	1	duplication	1	duplication	greater than 10kb
W06D11.2	chrX	12296021	12296577	1	duplication	1	duplication	greater than 10kb
W06D11.3	chrX	12298622	12299989	1	duplication	1	duplication	greater than 10kb
W06D11.4	chrX	12301521	12303225	1	duplication	1	duplication	greater than 10kb
W06H8.8	chrV	6120891	6202609	0.760041	duplication	0.760041	duplication	greater than 10kb
W09B12.1	chrX	16367156	16373965	1	duplication	1	duplication	greater than 10kb
W10G6.1	chrX	16245120	16245486	1	duplication	1	duplication	greater than 10kb
W10G6.2	chrX	16254765	16262056	1	duplication	1	duplication	greater than 10kb
W10G6.3	chrX	16262221	16265614	1	duplication	1	duplication	greater than 10kb
Y12A6A.1	chrX	13619494	13621658	1	duplication	1	duplication	greater than 10kb
Y12A6A.2	chrX	13618803	13619860	1	duplication	1	duplication	greater than 10kb
Y13C8A.1	chrX	16883599	16884468	1	duplication	1	duplication	greater than 10kb
Y13C8A.2	chrX	16885117	16885514	1	duplication	1	duplication	greater than 10kb
Y15E3A.1	chrX	15309304	15314830	1	duplication	1	duplication	greater than 10kb
Y15E3A.2	chrX	15314914	15317154	1	duplication	1	duplication	greater than 10kb
Y15E3A.3	chrX	15322179	15325740	1	duplication	1	duplication	greater than 10kb
Y15E3A.4	chrX	15330892	15333890	1	duplication	1	duplication	greater than 10kb
Y15E3A.5	chrX	15343028	15344078	1	duplication	1	duplication	greater than 10kb
Y16B4A.1	chrX	14773296	14783498	1	duplication	1	duplication	greater than 10kb
Y16B4A.2	chrX	14761837	14771782	1	duplication	1	duplication	greater than 10kb
Y17D7C.1	chrV	18707955	18708335	1	duplication	1	duplication	greater than 10kb
Y17D7C.2	chrV	18716046	18719916	1	duplication	1	duplication	greater than 10kb
Y26E6A.1	chrX	13914733	13917105	1	duplication	1	duplication	greater than 10kb
Y26E6A.2	chrX	13910868	13912912	1	duplication	1	duplication	greater than 10kb
Y26E6A.3	chrX	13908345	13909870	1	duplication	1	duplication	greater than 10kb
Y38A10A.5	chrV	6098975	6100536	1	duplication	1	duplication	greater than 10kb
Y38A10A.6	chrV	6097085	6099029	1	duplication	1	duplication	greater than 10kb
Y38A10A.7	chrV	6096010	6096886	1	duplication	1	duplication	greater than 10kb
Y40C7B.3	chrX	17258260	17259511	1	duplication	1	duplication	greater than 10kb
Y40C7B.4	chrX	17256160	17256706	1	duplication	1	duplication	greater than 10kb
Y57E12B.3	chrV	6931531	6935843	1	duplication	1	duplication	greater than 10kb
Y60A9.1	chrX	14392796	14394545	1	duplication	1	duplication	greater than 10kb
Y60A9.3	chrX	14383180	14383792	1	duplication	1	duplication	greater than 10kb
Y66C5A.1	chrX	14454633	14455451	1	duplication	1	duplication	greater than 10kb
Y66C5A.2	chrX	14460278	14462069	1	duplication	1	duplication	greater than 10kb
Y69H2.9	chrV	18701527	18706176	1	duplication	1	duplication	greater than 10kb
Y70D2A.1	chrX	14918765	14923818	1	duplication	1	duplication	greater than 10kb
Y70D2A.2	chrX	14901823	14905192	1	duplication	1	duplication	greater than 10kb
Y7A5A.1	chrX	15767366	15771441	1	duplication	1	duplication	greater than 10kb
Y7A5A.10	chrX	15793698	15794868	1	duplication	1	duplication	greater than 10kb
Y7A5A.11	chrX	15811789	15814969	1	duplication	1	duplication	greater than 10kb
Y7A5A.13	chrX	15773789	15774117	1	duplication	1	duplication	greater than 10kb
Y7A5A.2	chrX	15771638	15772667	1	duplication	1	duplication	greater than 10kb
Y7A5A.3	chrX	15781556	15784602	1	duplication	1	duplication	greater than 10kb
Y7A5A.5	chrX	15786460	15786758	1	duplication	1	duplication	greater than 10kb
Y7A5A.6	chrX	15797263	15799627	1	duplication	1	duplication	greater than 10kb
Y7A5A.7	chrX	15801241	15804104	1	duplication	1	duplication	greater than 10kb
Y7A5A.8	chrX	15821352	15825069	1	duplication	1	duplication	greater than 10kb
Y7A5A.9	chrX	15826575	15827938	1	duplication	1	duplication	greater than 10kb
ZK1073.1	chrX	16123875	16128794	1	duplication	1	duplication	greater than 10kb
ZK1073.2	chrX	16103570	16124272	1	duplication	1	duplication	greater than 10kb
ZK1086.1	chrX	13798155	13809789	1	duplication	1	duplication	greater than 10kb
ZK1086.2	chrX	13792236	13793557	1	duplication	1	duplication	greater than 10kb
ZK1086.3	chrX	13790694	13792190	1	duplication	1	duplication	greater than 10kb
ZK384.1	chrV	18731962	18732744	1	duplication	1	duplication	greater than 10kb
ZK384.2	chrV	18732773	18734438	0.736937	duplication	0.736937	duplication	greater than 10kb
ZK54.1	chrX	17460088	17464892	1	duplication	1	duplication	greater than 10kb
ZK54.2	chrX	17467045	17474460	1	duplication	1	duplication	greater than 10kb
ZK54.3	chrX	17465303	17466608	1	duplication	1	duplication	greater than 10kb
ZK662.2	chrX	15696661	15697988	1	duplication	1	duplication	greater than 10kb
ZK662.3	chrX	15708152	15716804	1	duplication	1	duplication	greater than 10kb
ZK662.4	chrX	15726060	15731957	1	duplication	1	duplication	greater than 10kb
ZK662.5	chrX	15721201	15723865	1	duplication	1	duplication	greater than 10kb
ZK662.6	chrX	15718633	15720251	1	duplication	1	duplication	greater than 10kb
ZK678.1	chrX	15731899	15735318	1	duplication	1	duplication	greater than 10kb
ZK678.2	chrX	15742541	15744230	1	duplication	1	duplication	greater than 10kb
ZK678.3	chrX	15748414	15749138	1	duplication	1	duplication	greater than 10kb
ZK678.4	chrX	15746936	15752070	1	duplication	1	duplication	greater than 10kb
ZK678.5	chrX	15752189	15757201	1	duplication	1	duplication	greater than 10kb
ZK678.8	chrX	15757799	15766272	1	duplication	1	duplication	greater than 10kb
2L52.1	chrII	1866	4663	0	unaffected	0	unaffected	unaffected
2RSSE.1	chrII	15268135	15273238	0	unaffected	0	unaffected	unaffected
2RSSE.2	chrII	15274314	15275613	0	unaffected	0	unaffected	unaffected
3R5.1	chrIII	13777588	13781032	0	unaffected	0	unaffected	unaffected
4R79.1	chrIV	17486945	17490461	0	unaffected	0	unaffected	unaffected
4R79.2	chrIV	17480359	17483294	0	unaffected	0	unaffected	unaffected
AC3.1	chrV	10368532	10369845	0	unaffected	0	unaffected	unaffected
AC3.10	chrV	10384133	10385688	0	unaffected	0	unaffected	unaffected
AC3.2	chrV	10372117	10374238	0	unaffected	0	unaffected	unaffected
AC3.3	chrV	10380315	10381800	0	unaffected	0	unaffected	unaffected
AC3.4	chrV	10382418	10383953	0	unaffected	0	unaffected	unaffected
AC3.5	chrV	10388446	10393480	0	unaffected	0	unaffected	unaffected
AC3.6	chrV	10393507	10395209	0	unaffected	0	unaffected	unaffected
AC3.7	chrV	10395653	10397794	0	unaffected	0	unaffected	unaffected
AC3.8	chrV	10398786	10401290	0	unaffected	0	unaffected	unaffected
AC7.1	chrIV	5112920	5122011	0	unaffected	0	unaffected	unaffected
AC7.2	chrIV	5126997	5145802	0	unaffected	0	unaffected	unaffected
AC7.3	chrIV	5111677	5112867	0	unaffected	0	unaffected	unaffected
AC8.4	chrX	226650	227394	0	unaffected	0	unaffected	unaffected
AH10.1	chrV	14146493	14148769	0	unaffected	0	unaffected	unaffected
AH10.2	chrV	14156815	14157607	0	unaffected	0	unaffected	unaffected
AH10.3	chrV	14144014	14145396	0	unaffected	0	unaffected	unaffected
AH10.4	chrV	14137332	14137845	0	unaffected	0	unaffected	unaffected
AH6.1	chrII	9512430	9516877	0	unaffected	0	unaffected	unaffected
AH6.10	chrII	9548345	9549639	0	unaffected	0	unaffected	unaffected
AH6.14	chrII	9532238	9533914	0	unaffected	0	unaffected	unaffected
AH6.2	chrII	9517508	9518837	0	unaffected	0	unaffected	unaffected
AH6.3	chrII	9519036	9520151	0	unaffected	0	unaffected	unaffected
AH6.4	chrII	9520140	9521611	0	unaffected	0	unaffected	unaffected
AH6.5	chrII	9524112	9526307	0	unaffected	0	unaffected	unaffected
AH6.7	chrII	9539210	9540763	0	unaffected	0	unaffected	unaffected
AH9.1	chrX	2243225	2247000	0	unaffected	0	unaffected	unaffected
AH9.2	chrX	2255839	2258073	0	unaffected	0	unaffected	unaffected
AH9.3	chrX	2259143	2260518	0	unaffected	0	unaffected	unaffected
AH9.4	chrX	2271016	2274329	0	unaffected	0	unaffected	unaffected
AH9.6	chrX	2263167	2267464	0	unaffected	0	unaffected	unaffected
AH9.7	chrX	2243144	2244459	0	unaffected	0	unaffected	unaffected
B0001.1	chrIV	12129481	12135073	0	unaffected	0	unaffected	unaffected
B0001.2	chrIV	12146458	12150953	0	unaffected	0	unaffected	unaffected
B0001.3	chrIV	12143408	12145709	0	unaffected	0	unaffected	unaffected
B0001.4	chrIV	12135057	12137325	0	unaffected	0	unaffected	unaffected
B0001.5	chrIV	12141137	12143309	0	unaffected	0	unaffected	unaffected
B0001.6	chrIV	12156815	12164252	0	unaffected	0	unaffected	unaffected
B0001.7	chrIV	12150035	12154220	0	unaffected	0	unaffected	unaffected
B0001.8	chrIV	12138822	12141036	0	unaffected	0	unaffected	unaffected
B0019.1	chrI	12759575	12764950	0	unaffected	0	unaffected	unaffected
B0019.2	chrI	12773646	12782247	0	unaffected	0	unaffected	unaffected
B0024.1	chrV	10291670	10292843	0	unaffected	0	unaffected	unaffected
B0024.10	chrV	10315224	10317371	0	unaffected	0	unaffected	unaffected
B0024.11	chrV	10317464	10319509	0	unaffected	0	unaffected	unaffected
B0024.12	chrV	10319508	10320161	0	unaffected	0	unaffected	unaffected
B0024.13	chrV	10320689	10322190	0	unaffected	0	unaffected	unaffected
B0024.14	chrV	10322261	10332087	0	unaffected	0	unaffected	unaffected
B0024.15	chrV	10289695	10291685	0	unaffected	0	unaffected	unaffected
B0024.2	chrV	10293492	10294596	0	unaffected	0	unaffected	unaffected
B0024.3	chrV	10287538	10289247	0	unaffected	0	unaffected	unaffected
B0024.4	chrV	10297373	10298957	0	unaffected	0	unaffected	unaffected
B0024.6	chrV	10308265	10314343	0	unaffected	0	unaffected	unaffected
B0024.8	chrV	10299447	10307329	0	unaffected	0	unaffected	unaffected
B0024.9	chrV	10314615	10315751	0	unaffected	0	unaffected	unaffected
B0025.1	chrI	6028487	6033460	0	unaffected	0	unaffected	unaffected
B0025.2	chrI	6022658	6026983	0	unaffected	0	unaffected	unaffected
B0025.4	chrI	6027193	6028373	0	unaffected	0	unaffected	unaffected
B0025.5	chrI	6024152	6024957	0	unaffected	0	unaffected	unaffected
B0034.1	chrII	5970079	5972638	0	unaffected	0	unaffected	unaffected
B0034.3	chrII	5945380	5956660	0	unaffected	0	unaffected	unaffected
B0034.4	chrII	5968109	5969033	0	unaffected	0	unaffected	unaffected
B0034.5	chrII	5972830	5974952	0	unaffected	0	unaffected	unaffected
B0034.7	chrII	5961651	5961975	0	unaffected	0	unaffected	unaffected
B0035.1	chrIV	11310949	11312475	0	unaffected	0	unaffected	unaffected
B0035.10	chrIV	11326534	11327321	0	unaffected	0	unaffected	unaffected
B0035.11	chrIV	11327591	11329349	0	unaffected	0	unaffected	unaffected
B0035.12	chrIV	11329443	11332922	0	unaffected	0	unaffected	unaffected
B0035.13	chrIV	11304698	11306698	0	unaffected	0	unaffected	unaffected
B0035.14	chrIV	11298985	11304765	0	unaffected	0	unaffected	unaffected
B0035.15	chrIV	11296968	11298397	0	unaffected	0	unaffected	unaffected
B0035.16	chrIV	11295125	11296867	0	unaffected	0	unaffected	unaffected
B0035.18	chrIV	11320297	11320621	0	unaffected	0	unaffected	unaffected
B0035.2	chrIV	11312450	11313960	0	unaffected	0	unaffected	unaffected
B0035.3	chrIV	11314054	11315028	0	unaffected	0	unaffected	unaffected
B0035.4	chrIV	11315182	11315855	0	unaffected	0	unaffected	unaffected
B0035.5	chrIV	11317394	11319928	0	unaffected	0	unaffected	unaffected
B0035.6	chrIV	11320777	11323614	0	unaffected	0	unaffected	unaffected
B0035.7	chrIV	11323862	11324448	0	unaffected	0	unaffected	unaffected
B0035.8	chrIV	11324696	11325200	0	unaffected	0	unaffected	unaffected
B0035.9	chrIV	11325995	11326307	0	unaffected	0	unaffected	unaffected
B0041.1	chrI	4664499	4665349	0	unaffected	0	unaffected	unaffected
B0041.2	chrI	4653471	4660152	0	unaffected	0	unaffected	unaffected
B0041.3	chrI	4644437	4645627	0	unaffected	0	unaffected	unaffected
B0041.4	chrI	4645636	4646966	0	unaffected	0	unaffected	unaffected
B0041.5	chrI	4648269	4650771	0	unaffected	0	unaffected	unaffected
B0041.6	chrI	4652143	4652907	0	unaffected	0	unaffected	unaffected
B0041.7	chrI	4665744	4671739	0	unaffected	0	unaffected	unaffected
B0041.8	chrI	4647309	4648279	0	unaffected	0	unaffected	unaffected
B0047.1	chrII	2040275	2041620	0	unaffected	0	unaffected	unaffected
B0047.2	chrII	2043027	2044109	0	unaffected	0	unaffected	unaffected
B0047.3	chrII	2044628	2046589	0	unaffected	0	unaffected	unaffected
B0198.1	chrX	12031377	12033969	0	unaffected	0	unaffected	unaffected
B0198.2	chrX	12028642	12031549	0	unaffected	0	unaffected	unaffected
B0198.3	chrX	12042547	12049279	0	unaffected	0	unaffected	unaffected
B0205.1	chrI	10713438	10718190	0	unaffected	0	unaffected	unaffected
B0205.10	chrI	10708351	10710364	0	unaffected	0	unaffected	unaffected
B0205.11	chrI	10732530	10733674	0	unaffected	0	unaffected	unaffected
B0205.12	chrI	10730455	10730701	0	unaffected	0	unaffected	unaffected
B0205.13	chrI	10727739	10728784	0	unaffected	0	unaffected	unaffected
B0205.14	chrI	10726906	10727340	0	unaffected	0	unaffected	unaffected
B0205.2	chrI	10724149	10726125	0	unaffected	0	unaffected	unaffected
B0205.3	chrI	10730717	10732437	0	unaffected	0	unaffected	unaffected
B0205.4	chrI	10741357	10744432	0	unaffected	0	unaffected	unaffected
B0205.5	chrI	10740206	10740579	0	unaffected	0	unaffected	unaffected
B0205.6	chrI	10736685	10739900	0	unaffected	0	unaffected	unaffected
B0205.7	chrI	10734010	10736610	0	unaffected	0	unaffected	unaffected
B0205.8	chrI	10728883	10730226	0	unaffected	0	unaffected	unaffected
B0205.9	chrI	10720814	10723580	0	unaffected	0	unaffected	unaffected
B0207.1	chrI	5965063	5967213	0	unaffected	0	unaffected	unaffected
B0207.10	chrI	5959009	5959528	0	unaffected	0	unaffected	unaffected
B0207.12	chrI	5967252	5973322	0	unaffected	0	unaffected	unaffected
B0207.2	chrI	5955031	5956885	0	unaffected	0	unaffected	unaffected
B0207.3	chrI	5942420	5945539	0	unaffected	0	unaffected	unaffected
B0207.4	chrI	5937478	5938887	0	unaffected	0	unaffected	unaffected
B0207.5	chrI	5919788	5935418	0	unaffected	0	unaffected	unaffected
B0207.6	chrI	5935371	5936946	0	unaffected	0	unaffected	unaffected
B0207.7	chrI	5945758	5947344	0	unaffected	0	unaffected	unaffected
B0207.9	chrI	5957461	5958361	0	unaffected	0	unaffected	unaffected
B0212.1	chrIV	3572466	3577625	0	unaffected	0	unaffected	unaffected
B0212.2	chrIV	3565196	3567810	0	unaffected	0	unaffected	unaffected
B0212.3	chrIV	3540183	3543598	0	unaffected	0	unaffected	unaffected
B0212.4	chrIV	3543623	3547596	0	unaffected	0	unaffected	unaffected
B0212.5	chrIV	3550883	3557427	0	unaffected	0	unaffected	unaffected
B0212.6	chrIV	3570714	3571642	0	unaffected	0	unaffected	unaffected
B0213.10	chrV	3955750	3957700	0	unaffected	0	unaffected	unaffected
B0213.11	chrV	3958223	3961174	0	unaffected	0	unaffected	unaffected
B0213.12	chrV	3961744	3963800	0	unaffected	0	unaffected	unaffected
B0213.14	chrV	3964763	3967856	0	unaffected	0	unaffected	unaffected
B0213.15	chrV	3968117	3970499	0	unaffected	0	unaffected	unaffected
B0213.16	chrV	3970696	3972986	0	unaffected	0	unaffected	unaffected
B0213.17	chrV	3978810	3979119	0	unaffected	0	unaffected	unaffected
B0213.2	chrV	3989075	3989755	0	unaffected	0	unaffected	unaffected
B0213.3	chrV	3987884	3988302	0	unaffected	0	unaffected	unaffected
B0213.4	chrV	3984397	3984834	0	unaffected	0	unaffected	unaffected
B0213.5	chrV	3981964	3982730	0	unaffected	0	unaffected	unaffected
B0213.6	chrV	3980039	3980614	0	unaffected	0	unaffected	unaffected
B0213.7	chrV	3977248	3978796	0	unaffected	0	unaffected	unaffected
B0213.8	chrV	3974645	3976249	0	unaffected	0	unaffected	unaffected
B0218.1	chrIV	8159343	8162028	0	unaffected	0	unaffected	unaffected
B0218.2	chrIV	8152428	8154845	0	unaffected	0	unaffected	unaffected
B0218.3	chrIV	8148779	8150727	0	unaffected	0	unaffected	unaffected
B0218.5	chrIV	8155236	8156433	0	unaffected	0	unaffected	unaffected
B0218.6	chrIV	8161737	8163781	0	unaffected	0	unaffected	unaffected
B0218.7	chrIV	8164579	8166064	0	unaffected	0	unaffected	unaffected
B0218.8	chrIV	8167148	8168760	0	unaffected	0	unaffected	unaffected
B0222.1	chrV	9134276	9135553	0	unaffected	0	unaffected	unaffected
B0222.10	chrV	9158360	9159515	0	unaffected	0	unaffected	unaffected
B0222.11	chrV	9165796	9168018	0	unaffected	0	unaffected	unaffected
B0222.3	chrV	9138927	9141375	0	unaffected	0	unaffected	unaffected
B0222.4	chrV	9144592	9146877	0	unaffected	0	unaffected	unaffected
B0222.5	chrV	9152298	9154850	0	unaffected	0	unaffected	unaffected
B0222.6	chrV	9159618	9160640	0	unaffected	0	unaffected	unaffected
B0222.7	chrV	9162027	9162982	0	unaffected	0	unaffected	unaffected
B0222.8	chrV	9164271	9165284	0	unaffected	0	unaffected	unaffected
B0222.9	chrV	9168368	9173001	0	unaffected	0	unaffected	unaffected
B0228.1	chrII	7755955	7756856	0	unaffected	0	unaffected	unaffected
B0228.4	chrII	7724849	7752673	0	unaffected	0	unaffected	unaffected
B0228.5	chrII	7752516	7753554	0	unaffected	0	unaffected	unaffected
B0228.6	chrII	7754514	7755104	0	unaffected	0	unaffected	unaffected
B0228.7	chrII	7757134	7758387	0	unaffected	0	unaffected	unaffected
B0228.9	chrII	7762009	7763617	0	unaffected	0	unaffected	unaffected
B0238.1	chrV	5240753	5243120	0	unaffected	0	unaffected	unaffected
B0238.10	chrV	5274057	5275546	0	unaffected	0	unaffected	unaffected
B0238.11	chrV	5269466	5270728	0	unaffected	0	unaffected	unaffected
B0238.12	chrV	5267805	5268807	0	unaffected	0	unaffected	unaffected
B0238.13	chrV	5243712	5248024	0	unaffected	0	unaffected	unaffected
B0238.15	chrV	5240172	5240435	0	unaffected	0	unaffected	unaffected
B0238.3	chrV	5250587	5252100	0	unaffected	0	unaffected	unaffected
B0238.6	chrV	5258019	5259532	0	unaffected	0	unaffected	unaffected
B0238.7	chrV	5260315	5263083	0	unaffected	0	unaffected	unaffected
B0238.8	chrV	5263934	5265760	0	unaffected	0	unaffected	unaffected
B0238.9	chrV	5275532	5278290	0	unaffected	0	unaffected	unaffected
B0240.1	chrV	11727879	11730142	0	unaffected	0	unaffected	unaffected
B0240.2	chrV	11733525	11736950	0	unaffected	0	unaffected	unaffected
B0240.3	chrV	11718070	11725634	0	unaffected	0	unaffected	unaffected
B0240.4	chrV	11730973	11733461	0	unaffected	0	unaffected	unaffected
B0244.11	chrIII	5767836	5768620	0	unaffected	0	unaffected	unaffected
B0244.2	chrIII	5755492	5765769	0	unaffected	0	unaffected	unaffected
B0244.7	chrIII	5731454	5732808	0	unaffected	0	unaffected	unaffected
B0244.8	chrIII	5728131	5730348	0	unaffected	0	unaffected	unaffected
B0250.1	chrV	20479655	20480815	0	unaffected	0	unaffected	unaffected
B0250.2	chrV	20476716	20479058	0	unaffected	0	unaffected	unaffected
B0250.4	chrV	20458622	20464455	0	unaffected	0	unaffected	unaffected
B0250.5	chrV	20493892	20497315	0	unaffected	0	unaffected	unaffected
B0250.8	chrV	20469671	20470454	0	unaffected	0	unaffected	unaffected
B0250.9	chrV	20480760	20485354	0	unaffected	0	unaffected	unaffected
B0252.1	chrII	6919686	6923621	0	unaffected	0	unaffected	unaffected
B0252.2	chrII	6910027	6912653	0	unaffected	0	unaffected	unaffected
B0252.3	chrII	6902825	6907713	0	unaffected	0	unaffected	unaffected
B0252.4	chrII	6912497	6913321	0	unaffected	0	unaffected	unaffected
B0252.5	chrII	6916948	6918878	0	unaffected	0	unaffected	unaffected
B0252.8	chrII	6916111	6916923	0	unaffected	0	unaffected	unaffected
B0261.1	chrI	5263696	5268387	0	unaffected	0	unaffected	unaffected
B0261.2	chrI	5245742	5263429	0	unaffected	0	unaffected	unaffected
B0261.4	chrI	5244285	5245526	0	unaffected	0	unaffected	unaffected
B0261.5	chrI	5249774	5250440	0	unaffected	0	unaffected	unaffected
B0261.6	chrI	5255449	5256926	0	unaffected	0	unaffected	unaffected
B0261.7	chrI	5269546	5270937	0	unaffected	0	unaffected	unaffected
B0261.8	chrI	5271279	5272040	0	unaffected	0	unaffected	unaffected
B0261.9	chrI	5268421	5269466	0	unaffected	0	unaffected	unaffected
B0272.1	chrX	9434392	9436834	0	unaffected	0	unaffected	unaffected
B0272.2	chrX	9440338	9441505	0	unaffected	0	unaffected	unaffected
B0272.3	chrX	9431365	9432689	0	unaffected	0	unaffected	unaffected
B0272.4	chrX	9428371	9430264	0	unaffected	0	unaffected	unaffected
B0273.1	chrIV	5493985	5495241	0	unaffected	0	unaffected	unaffected
B0273.2	chrIV	5486675	5490322	0	unaffected	0	unaffected	unaffected
B0273.3	chrIV	5484036	5486201	0	unaffected	0	unaffected	unaffected
B0273.4	chrIV	5495656	5516256	0	unaffected	0	unaffected	unaffected
B0280.1	chrIII	7133726	7136401	0	unaffected	0	unaffected	unaffected
B0280.10	chrIII	7131971	7133616	0	unaffected	0	unaffected	unaffected
B0280.11	chrIII	7136445	7138216	0	unaffected	0	unaffected	unaffected
B0280.12	chrIII	7138620	7144770	0	unaffected	0	unaffected	unaffected
B0280.13	chrIII	7128836	7131986	0	unaffected	0	unaffected	unaffected
B0280.17	chrIII	7134959	7136065	0	unaffected	0	unaffected	unaffected
B0280.2	chrIII	7124601	7128320	0	unaffected	0	unaffected	unaffected
B0280.3	chrIII	7123061	7124270	0	unaffected	0	unaffected	unaffected
B0280.4	chrIII	7108259	7109248	0	unaffected	0	unaffected	unaffected
B0280.5	chrIII	7102023	7103930	0	unaffected	0	unaffected	unaffected
B0280.7	chrIII	7110240	7111811	0	unaffected	0	unaffected	unaffected
B0280.8	chrIII	7112236	7115378	0	unaffected	0	unaffected	unaffected
B0280.9	chrIII	7120841	7122833	0	unaffected	0	unaffected	unaffected
B0281.1	chrII	2313071	2314932	0	unaffected	0	unaffected	unaffected
B0281.3	chrII	2307045	2308356	0	unaffected	0	unaffected	unaffected
B0281.4	chrII	2297851	2298798	0	unaffected	0	unaffected	unaffected
B0281.5	chrII	2299844	2300887	0	unaffected	0	unaffected	unaffected
B0281.6	chrII	2301312	2302234	0	unaffected	0	unaffected	unaffected
B0284.1	chrIII	4376474	4379172	0	unaffected	0	unaffected	unaffected
B0284.2	chrIII	4381710	4384113	0	unaffected	0	unaffected	unaffected
B0284.3	chrIII	4379339	4381013	0	unaffected	0	unaffected	unaffected
B0284.4	chrIII	4384758	4387729	0	unaffected	0	unaffected	unaffected
B0285.1	chrIII	4333368	4340455	0	unaffected	0	unaffected	unaffected
B0285.10	chrIII	4370856	4372792	0	unaffected	0	unaffected	unaffected
B0285.3	chrIII	4341656	4343308	0	unaffected	0	unaffected	unaffected
B0285.4	chrIII	4343432	4345194	0	unaffected	0	unaffected	unaffected
B0285.5	chrIII	4345308	4350051	0	unaffected	0	unaffected	unaffected
B0285.6	chrIII	4352217	4355860	0	unaffected	0	unaffected	unaffected
B0285.7	chrIII	4356510	4364944	0	unaffected	0	unaffected	unaffected
B0285.8	chrIII	4365346	4367441	0	unaffected	0	unaffected	unaffected
B0285.9	chrIII	4367803	4370132	0	unaffected	0	unaffected	unaffected
B0286.1	chrII	4378658	4386355	0	unaffected	0	unaffected	unaffected
B0286.2	chrII	4359085	4368285	0	unaffected	0	unaffected	unaffected
B0286.3	chrII	4369628	4372572	0	unaffected	0	unaffected	unaffected
B0286.4	chrII	4372743	4376745	0	unaffected	0	unaffected	unaffected
B0286.5	chrII	4379885	4383290	0	unaffected	0	unaffected	unaffected
B0286.6	chrII	4368493	4447363	0	unaffected	0	unaffected	unaffected
B0294.1	chrX	1896656	1897337	0	unaffected	0	unaffected	unaffected
B0303.11	chrIII	8703225	8710031	0	unaffected	0	unaffected	unaffected
B0303.14	chrIII	8713907	8716103	0	unaffected	0	unaffected	unaffected
B0303.15	chrIII	8717560	8718486	0	unaffected	0	unaffected	unaffected
B0303.16	chrIII	8705029	8706266	0	unaffected	0	unaffected	unaffected
B0303.2	chrIII	8684726	8686400	0	unaffected	0	unaffected	unaffected
B0303.3	chrIII	8686036	8688396	0	unaffected	0	unaffected	unaffected
B0303.4	chrIII	8689768	8693393	0	unaffected	0	unaffected	unaffected
B0303.7	chrIII	8693556	8699374	0	unaffected	0	unaffected	unaffected
B0303.8	chrIII	8699401	8700254	0	unaffected	0	unaffected	unaffected
B0303.9	chrIII	8700847	8703225	0	unaffected	0	unaffected	unaffected
B0304.2	chrII	4523611	4524523	0	unaffected	0	unaffected	unaffected
B0304.3	chrII	4512207	4522763	0	unaffected	0	unaffected	unaffected
B0304.4	chrII	4522458	4523219	0	unaffected	0	unaffected	unaffected
B0304.5	chrII	4529632	4531961	0	unaffected	0	unaffected	unaffected
B0304.6	chrII	4534738	4537238	0	unaffected	0	unaffected	unaffected
B0304.7	chrII	4541861	4543665	0	unaffected	0	unaffected	unaffected
B0304.8	chrII	4524630	4527897	0	unaffected	0	unaffected	unaffected
B0304.9	chrII	4538984	4540728	0	unaffected	0	unaffected	unaffected
B0310.1	chrX	493236	497214	0	unaffected	0	unaffected	unaffected
B0310.2	chrX	501965	506944	0	unaffected	0	unaffected	unaffected
B0310.3	chrX	510899	514483	0	unaffected	0	unaffected	unaffected
B0310.5	chrX	525928	530177	0	unaffected	0	unaffected	unaffected
B0310.6	chrX	530625	530962	0	unaffected	0	unaffected	unaffected
B0331.1	chrV	9654680	9657925	0	unaffected	0	unaffected	unaffected
B0331.2	chrV	9658906	9661590	0	unaffected	0	unaffected	unaffected
B0334.1	chrII	11485445	11486710	0	unaffected	0	unaffected	unaffected
B0334.10	chrII	11518423	11519507	0	unaffected	0	unaffected	unaffected
B0334.11	chrII	11493166	11495250	0	unaffected	0	unaffected	unaffected
B0334.13	chrII	11488222	11489555	0	unaffected	0	unaffected	unaffected
B0334.15	chrII	11496713	11499556	0	unaffected	0	unaffected	unaffected
B0334.2	chrII	11483136	11485295	0	unaffected	0	unaffected	unaffected
B0334.3	chrII	11489540	11492957	0	unaffected	0	unaffected	unaffected
B0334.4	chrII	11495627	11496605	0	unaffected	0	unaffected	unaffected
B0334.6	chrII	11510610	11513826	0	unaffected	0	unaffected	unaffected
B0334.7	chrII	11515010	11518090	0	unaffected	0	unaffected	unaffected
B0334.8	chrII	11519434	11526998	0	unaffected	0	unaffected	unaffected
B0336.1	chrIII	5722803	5727068	0	unaffected	0	unaffected	unaffected
B0336.10	chrIII	5705467	5706281	0	unaffected	0	unaffected	unaffected
B0336.11	chrIII	5706691	5709284	0	unaffected	0	unaffected	unaffected
B0336.13	chrIII	5693990	5695178	0	unaffected	0	unaffected	unaffected
B0336.2	chrIII	5716067	5717541	0	unaffected	0	unaffected	unaffected
B0336.3	chrIII	5711502	5714801	0	unaffected	0	unaffected	unaffected
B0336.4	chrIII	5698389	5702257	0	unaffected	0	unaffected	unaffected
B0336.5	chrIII	5692874	5693893	0	unaffected	0	unaffected	unaffected
B0336.6	chrIII	5690061	5692695	0	unaffected	0	unaffected	unaffected
B0336.7	chrIII	5694689	5697320	0	unaffected	0	unaffected	unaffected
B0336.8	chrIII	5697430	5697964	0	unaffected	0	unaffected	unaffected
B0336.9	chrIII	5702209	5705421	0	unaffected	0	unaffected	unaffected
B0344.2	chrX	1576629	1590890	0	unaffected	0	unaffected	unaffected
B0348.2	chrV	45462	46923	0	unaffected	0	unaffected	unaffected
B0348.4	chrV	20824	43971	0	unaffected	0	unaffected	unaffected
B0348.5	chrV	5689	6511	0	unaffected	0	unaffected	unaffected
B0348.6	chrV	6588	7822	0	unaffected	0	unaffected	unaffected
B0353.1	chrIII	557514	572134	0	unaffected	0	unaffected	unaffected
B0361.10	chrIII	7285913	7287541	0	unaffected	0	unaffected	unaffected
B0361.11	chrIII	7277539	7281153	0	unaffected	0	unaffected	unaffected
B0361.2	chrIII	7293567	7308300	0	unaffected	0	unaffected	unaffected
B0361.3	chrIII	7281339	7283892	0	unaffected	0	unaffected	unaffected
B0361.4	chrIII	7258948	7268422	0	unaffected	0	unaffected	unaffected
B0361.5	chrIII	7268350	7275334	0	unaffected	0	unaffected	unaffected
B0361.6	chrIII	7275440	7277210	0	unaffected	0	unaffected	unaffected
B0361.7	chrIII	7283856	7285819	0	unaffected	0	unaffected	unaffected
B0361.8	chrIII	7287782	7290500	0	unaffected	0	unaffected	unaffected
B0361.9	chrIII	7298283	7299579	0	unaffected	0	unaffected	unaffected
B0365.1	chrV	13116487	13120120	0	unaffected	0	unaffected	unaffected
B0365.3	chrV	13126391	13129982	0	unaffected	0	unaffected	unaffected
B0365.5	chrV	13131912	13134843	0	unaffected	0	unaffected	unaffected
B0365.6	chrV	13134925	13138071	0	unaffected	0	unaffected	unaffected
B0365.7	chrV	13138965	13150276	0	unaffected	0	unaffected	unaffected
B0379.1	chrI	10074957	10077739	0	unaffected	0	unaffected	unaffected
B0379.2	chrI	10070911	10071819	0	unaffected	0	unaffected	unaffected
B0379.3	chrI	10080140	10086280	0	unaffected	0	unaffected	unaffected
B0379.4	chrI	10086380	10102001	0	unaffected	0	unaffected	unaffected
B0379.7	chrI	10072570	10074376	0	unaffected	0	unaffected	unaffected
B0391.10	chrV	15585677	15592966	0	unaffected	0	unaffected	unaffected
B0391.11	chrV	15600340	15602326	0	unaffected	0	unaffected	unaffected
B0391.12	chrV	15613166	15614949	0	unaffected	0	unaffected	unaffected
B0391.4	chrV	15610870	15612572	0	unaffected	0	unaffected	unaffected
B0391.5	chrV	15605704	15610361	0	unaffected	0	unaffected	unaffected
B0391.6	chrV	15602895	15605136	0	unaffected	0	unaffected	unaffected
B0391.9	chrV	15593442	15593780	0	unaffected	0	unaffected	unaffected
B0393.1	chrIII	4752863	4754048	0	unaffected	0	unaffected	unaffected
B0393.2	chrIII	4754396	4756984	0	unaffected	0	unaffected	unaffected
B0393.3	chrIII	4757212	4759696	0	unaffected	0	unaffected	unaffected
B0393.4	chrIII	4759706	4763574	0	unaffected	0	unaffected	unaffected
B0393.5	chrIII	4765782	4776242	0	unaffected	0	unaffected	unaffected
B0393.6	chrIII	4780123	4781946	0	unaffected	0	unaffected	unaffected
B0393.7	chrIII	4776228	4778030	0	unaffected	0	unaffected	unaffected
B0393.8	chrIII	4751842	4752335	0	unaffected	0	unaffected	unaffected
B0393.9	chrIII	4778354	4780123	0	unaffected	0	unaffected	unaffected
B0399.1	chrV	19565355	19606090	0	unaffected	0	unaffected	unaffected
B0399.2	chrV	19550985	19555842	0	unaffected	0	unaffected	unaffected
B0403.2	chrX	7050583	7055330	0	unaffected	0	unaffected	unaffected
B0403.3	chrX	7061804	7063286	0	unaffected	0	unaffected	unaffected
B0403.4	chrX	7066300	7068519	0	unaffected	0	unaffected	unaffected
B0403.5	chrX	7057763	7061638	0	unaffected	0	unaffected	unaffected
B0403.6	chrX	7071345	7075293	0	unaffected	0	unaffected	unaffected
B0410.2	chrX	2885858	2890593	0	unaffected	0	unaffected	unaffected
B0410.3	chrX	2890565	2891483	0	unaffected	0	unaffected	unaffected
B0412.1	chrIII	816239	821723	0	unaffected	0	unaffected	unaffected
B0412.2	chrIII	811821	813758	0	unaffected	0	unaffected	unaffected
B0412.3	chrIII	795130	809434	0	unaffected	0	unaffected	unaffected
B0412.4	chrIII	794288	795072	0	unaffected	0	unaffected	unaffected
B0414.1	chrI	5801874	5803269	0	unaffected	0	unaffected	unaffected
B0414.2	chrI	5776156	5788612	0	unaffected	0	unaffected	unaffected
B0414.3	chrI	5774587	5775613	0	unaffected	0	unaffected	unaffected
B0414.5	chrI	5788633	5791755	0	unaffected	0	unaffected	unaffected
B0414.6	chrI	5792326	5795124	0	unaffected	0	unaffected	unaffected
B0414.7	chrI	5795406	5801302	0	unaffected	0	unaffected	unaffected
B0414.8	chrI	5803961	5807294	0	unaffected	0	unaffected	unaffected
B0416.1	chrX	9303664	9310424	0	unaffected	0	unaffected	unaffected
B0416.3	chrX	9291591	9293587	0	unaffected	0	unaffected	unaffected
B0416.4	chrX	9278902	9279887	0	unaffected	0	unaffected	unaffected
B0416.5	chrX	9268572	9270794	0	unaffected	0	unaffected	unaffected
B0416.6	chrX	9293606	9296563	0	unaffected	0	unaffected	unaffected
B0416.7	chrX	9296885	9297891	0	unaffected	0	unaffected	unaffected
B0432.1	chrII	297398	299527	0	unaffected	0	unaffected	unaffected
B0432.10	chrII	283886	286275	0	unaffected	0	unaffected	unaffected
B0432.12	chrII	296274	297017	0	unaffected	0	unaffected	unaffected
B0432.13	chrII	276211	282576	0	unaffected	0	unaffected	unaffected
B0432.14	chrII	264352	265841	0	unaffected	0	unaffected	unaffected
B0432.2	chrII	290580	291861	0	unaffected	0	unaffected	unaffected
B0432.3	chrII	288936	290399	0	unaffected	0	unaffected	unaffected
B0432.4	chrII	286624	288850	0	unaffected	0	unaffected	unaffected
B0432.5	chrII	257818	261063	0	unaffected	0	unaffected	unaffected
B0432.6	chrII	266446	269280	0	unaffected	0	unaffected	unaffected
B0432.7	chrII	269389	273966	0	unaffected	0	unaffected	unaffected
B0432.8	chrII	276425	278738	0	unaffected	0	unaffected	unaffected
B0432.9	chrII	280555	283697	0	unaffected	0	unaffected	unaffected
B0454.1	chrII	3056643	3060251	0	unaffected	0	unaffected	unaffected
B0457.1	chrII	8896779	8908592	0	unaffected	0	unaffected	unaffected
B0457.2	chrII	8924509	8926517	0	unaffected	0	unaffected	unaffected
B0457.6	chrII	8922389	8924311	0	unaffected	0	unaffected	unaffected
B0462.1	chrV	18324993	18328763	0	unaffected	0	unaffected	unaffected
B0462.3	chrV	18318566	18319748	0	unaffected	0	unaffected	unaffected
B0462.4	chrV	18329083	18331151	0	unaffected	0	unaffected	unaffected
B0462.5	chrV	18322186	18323299	0	unaffected	0	unaffected	unaffected
B0464.1	chrIII	9489077	9491152	0	unaffected	0	unaffected	unaffected
B0464.2	chrIII	9491219	9497236	0	unaffected	0	unaffected	unaffected
B0464.3	chrIII	9488533	9489102	0	unaffected	0	unaffected	unaffected
B0464.4	chrIII	9469841	9485367	0	unaffected	0	unaffected	unaffected
B0464.5	chrIII	9456478	9462921	0	unaffected	0	unaffected	unaffected
B0464.6	chrIII	9462899	9465881	0	unaffected	0	unaffected	unaffected
B0464.7	chrIII	9467372	9467982	0	unaffected	0	unaffected	unaffected
B0464.8	chrIII	9468071	9470450	0	unaffected	0	unaffected	unaffected
B0464.9	chrIII	9465688	9467064	0	unaffected	0	unaffected	unaffected
B0478.1	chrIV	6957629	6963705	0	unaffected	0	unaffected	unaffected
B0478.3	chrIV	6963863	6964551	0	unaffected	0	unaffected	unaffected
B0491.1	chrII	11348365	11350312	0	unaffected	0	unaffected	unaffected
B0491.2	chrII	11336626	11337771	0	unaffected	0	unaffected	unaffected
B0491.3	chrII	11338385	11339535	0	unaffected	0	unaffected	unaffected
B0491.4	chrII	11340069	11343466	0	unaffected	0	unaffected	unaffected
B0491.5	chrII	11343651	11345679	0	unaffected	0	unaffected	unaffected
B0491.6	chrII	11345880	11347893	0	unaffected	0	unaffected	unaffected
B0491.7	chrII	11350125	11351311	0	unaffected	0	unaffected	unaffected
B0491.8	chrII	11358382	11370248	0	unaffected	0	unaffected	unaffected
B0495.1	chrII	7709735	7711391	0	unaffected	0	unaffected	unaffected
B0495.10	chrII	7711817	7718538	0	unaffected	0	unaffected	unaffected
B0495.2	chrII	7699200	7702251	0	unaffected	0	unaffected	unaffected
B0495.4	chrII	7690655	7693906	0	unaffected	0	unaffected	unaffected
B0495.5	chrII	7695882	7698454	0	unaffected	0	unaffected	unaffected
B0495.6	chrII	7698558	7699125	0	unaffected	0	unaffected	unaffected
B0495.7	chrII	7701894	7705182	0	unaffected	0	unaffected	unaffected
B0495.8	chrII	7705481	7707430	0	unaffected	0	unaffected	unaffected
B0495.9	chrII	7707528	7708663	0	unaffected	0	unaffected	unaffected
B0496.1	chrIV	7446378	7447452	0	unaffected	0	unaffected	unaffected
B0496.11	chrIV	7433536	7433947	0	unaffected	0	unaffected	unaffected
B0496.2	chrIV	7447844	7449363	0	unaffected	0	unaffected	unaffected
B0496.3	chrIV	7424484	7444651	0	unaffected	0	unaffected	unaffected
B0496.5	chrIV	7420946	7422660	0	unaffected	0	unaffected	unaffected
B0496.6	chrIV	7419140	7419960	0	unaffected	0	unaffected	unaffected
B0496.7	chrIV	7444622	7445354	0	unaffected	0	unaffected	unaffected
B0496.8	chrIV	7449072	7451434	0	unaffected	0	unaffected	unaffected
B0507.10	chrV	8758797	8760494	0	unaffected	0	unaffected	unaffected
B0507.11	chrV	8771876	8773759	0	unaffected	0	unaffected	unaffected
B0507.3	chrV	8768886	8770854	0	unaffected	0	unaffected	unaffected
B0507.6	chrV	8746135	8753044	0	unaffected	0	unaffected	unaffected
B0507.7	chrV	8756467	8758698	0	unaffected	0	unaffected	unaffected
B0507.8	chrV	8760664	8763172	0	unaffected	0	unaffected	unaffected
B0507.9	chrV	8764865	8766016	0	unaffected	0	unaffected	unaffected
B0511.1	chrI	10667943	10671005	0	unaffected	0	unaffected	unaffected
B0511.10	chrI	10640381	10642272	0	unaffected	0	unaffected	unaffected
B0511.11	chrI	10648589	10654168	0	unaffected	0	unaffected	unaffected
B0511.12	chrI	10654286	10661591	0	unaffected	0	unaffected	unaffected
B0511.13	chrI	10633178	10636006	0	unaffected	0	unaffected	unaffected
B0511.14	chrI	10662515	10666866	0	unaffected	0	unaffected	unaffected
B0511.2	chrI	10651018	10652951	0	unaffected	0	unaffected	unaffected
B0511.3	chrI	10646750	10647766	0	unaffected	0	unaffected	unaffected
B0511.4	chrI	10644272	10645606	0	unaffected	0	unaffected	unaffected
B0511.5	chrI	10628731	10631662	0	unaffected	0	unaffected	unaffected
B0511.7	chrI	10631639	10633141	0	unaffected	0	unaffected	unaffected
B0511.8	chrI	10636681	10638966	0	unaffected	0	unaffected	unaffected
B0511.9	chrI	10639074	10640219	0	unaffected	0	unaffected	unaffected
B0513.1	chrIV	13888063	13893956	0	unaffected	0	unaffected	unaffected
B0513.2	chrIV	13882706	13884152	0	unaffected	0	unaffected	unaffected
B0513.3	chrIV	13882168	13882638	0	unaffected	0	unaffected	unaffected
B0513.4	chrIV	13880112	13881517	0	unaffected	0	unaffected	unaffected
B0513.5	chrIV	13868528	13876592	0	unaffected	0	unaffected	unaffected
B0513.6	chrIV	13854329	13857326	0	unaffected	0	unaffected	unaffected
B0513.9	chrIV	13860118	13865269	0	unaffected	0	unaffected	unaffected
B0523.1	chrIII	8671622	8673545	0	unaffected	0	unaffected	unaffected
B0523.3	chrIII	8670463	8674970	0	unaffected	0	unaffected	unaffected
B0523.5	chrIII	8675216	8683612	0	unaffected	0	unaffected	unaffected
B0524.2	chrIII	1894092	1899847	0	unaffected	0	unaffected	unaffected
B0524.3	chrIII	1887548	1889682	0	unaffected	0	unaffected	unaffected
B0524.4	chrIII	1883597	1886209	0	unaffected	0	unaffected	unaffected
B0524.5	chrIII	1891373	1893833	0	unaffected	0	unaffected	unaffected
B0524.6	chrIII	1902183	1905631	0	unaffected	0	unaffected	unaffected
B0545.1	chrIV	92015	110924	0	unaffected	0	unaffected	unaffected
B0545.3	chrIV	86874	90082	0	unaffected	0	unaffected	unaffected
B0545.4	chrIV	109053	109943	0	unaffected	0	unaffected	unaffected
B0546.1	chrIV	3385634	3386904	0	unaffected	0	unaffected	unaffected
B0546.2	chrIV	3373390	3378129	0	unaffected	0	unaffected	unaffected
B0546.3	chrIV	3378787	3382831	0	unaffected	0	unaffected	unaffected
B0546.4	chrIV	3382944	3384144	0	unaffected	0	unaffected	unaffected
B0547.1	chrIV	5649519	5651070	0	unaffected	0	unaffected	unaffected
B0547.4	chrIV	5643240	5645603	0	unaffected	0	unaffected	unaffected
B0554.1	chrV	438401	438675	0	unaffected	0	unaffected	unaffected
B0554.2	chrV	434768	436727	0	unaffected	0	unaffected	unaffected
B0554.4	chrV	430612	433575	0	unaffected	0	unaffected	unaffected
B0554.5	chrV	424440	426561	0	unaffected	0	unaffected	unaffected
B0554.6	chrV	422498	424167	0	unaffected	0	unaffected	unaffected
B0554.7	chrV	437576	441024	0	unaffected	0	unaffected	unaffected
B0563.1	chrX	9171504	9172147	0	unaffected	0	unaffected	unaffected
B0563.10	chrX	9166690	9167199	0	unaffected	0	unaffected	unaffected
B0563.2	chrX	9163106	9165912	0	unaffected	0	unaffected	unaffected
B0563.4	chrX	9150634	9160597	0	unaffected	0	unaffected	unaffected
B0563.5	chrX	9146058	9147498	0	unaffected	0	unaffected	unaffected
B0563.6	chrX	9137869	9145538	0	unaffected	0	unaffected	unaffected
B0563.7	chrX	9152377	9154127	0	unaffected	0	unaffected	unaffected
B0563.8	chrX	9173627	9174433	0	unaffected	0	unaffected	unaffected
B0563.9	chrX	9168481	9168965	0	unaffected	0	unaffected	unaffected
B0564.1	chrIV	13098953	13100592	0	unaffected	0	unaffected	unaffected
B0564.10	chrIV	13119071	13124363	0	unaffected	0	unaffected	unaffected
B0564.11	chrIV	13105298	13106902	0	unaffected	0	unaffected	unaffected
B0564.2	chrIV	13107632	13111479	0	unaffected	0	unaffected	unaffected
B0564.3	chrIV	13108115	13109775	0	unaffected	0	unaffected	unaffected
B0564.4	chrIV	13111495	13113058	0	unaffected	0	unaffected	unaffected
B0564.7	chrIV	13100688	13104855	0	unaffected	0	unaffected	unaffected
B0564.9	chrIV	13135219	13138798	0	unaffected	0	unaffected	unaffected
BE0003N10.1	chrIII	1037498	1046264	0	unaffected	0	unaffected	unaffected
BE0003N10.2	chrIII	1031303	1037202	0	unaffected	0	unaffected	unaffected
BE0003N10.3	chrIII	1046237	1060000	0	unaffected	0	unaffected	unaffected
BE10.1	chrIII	12787577	12789376	0	unaffected	0	unaffected	unaffected
BE10.2	chrIII	12793282	12798056	0	unaffected	0	unaffected	unaffected
BE10.3	chrIII	12807989	12811549	0	unaffected	0	unaffected	unaffected
BE10.4	chrIII	12813413	12816697	0	unaffected	0	unaffected	unaffected
BE10.5	chrIII	12806108	12806754	0	unaffected	0	unaffected	unaffected
C01A2.1	chrI	13408785	13411440	0	unaffected	0	unaffected	unaffected
C01A2.2	chrI	13397256	13398517	0	unaffected	0	unaffected	unaffected
C01A2.3	chrI	13387805	13391439	0	unaffected	0	unaffected	unaffected
C01A2.4	chrI	13392104	13393990	0	unaffected	0	unaffected	unaffected
C01A2.5	chrI	13384740	13387073	0	unaffected	0	unaffected	unaffected
C01A2.6	chrI	13379905	13384360	0	unaffected	0	unaffected	unaffected
C01A2.7	chrI	13402435	13404088	0	unaffected	0	unaffected	unaffected
C01A2.9	chrI	13376864	13377338	0	unaffected	0	unaffected	unaffected
C01B10.10	chrIV	6624359	6627981	0	unaffected	0	unaffected	unaffected
C01B10.11	chrIV	6657967	6660425	0	unaffected	0	unaffected	unaffected
C01B10.3	chrIV	6619031	6621341	0	unaffected	0	unaffected	unaffected
C01B10.4	chrIV	6628341	6631734	0	unaffected	0	unaffected	unaffected
C01B10.44	chrIV	6623678	6624482	0	unaffected	0	unaffected	unaffected
C01B10.5	chrIV	6646022	6646928	0	unaffected	0	unaffected	unaffected
C01B10.6	chrIV	6640149	6645341	0	unaffected	0	unaffected	unaffected
C01B10.7	chrIV	6638544	6639253	0	unaffected	0	unaffected	unaffected
C01B10.8	chrIV	6635027	6638147	0	unaffected	0	unaffected	unaffected
C01B10.9	chrIV	6632210	6634987	0	unaffected	0	unaffected	unaffected
C01B12.1	chrII	23327	24457	0	unaffected	0	unaffected	unaffected
C01B12.2	chrII	19537	22170	0	unaffected	0	unaffected	unaffected
C01B12.3	chrII	12984	16001	0	unaffected	0	unaffected	unaffected
C01B12.4	chrII	6663	9233	0	unaffected	0	unaffected	unaffected
C01B12.5	chrII	9807	11846	0	unaffected	0	unaffected	unaffected
C01B12.8	chrII	23880	25435	0	unaffected	0	unaffected	unaffected
C01B9.1	chrII	13771505	13778956	0	unaffected	0	unaffected	unaffected
C01B9.4	chrII	13770769	13783947	0	unaffected	0	unaffected	unaffected
C01C10.1	chrX	7431424	7433490	0	unaffected	0	unaffected	unaffected
C01C10.2	chrX	7435751	7437936	0	unaffected	0	unaffected	unaffected
C01C10.3	chrX	7439353	7442534	0	unaffected	0	unaffected	unaffected
C01C10.4	chrX	7433586	7435662	0	unaffected	0	unaffected	unaffected
C01C4.1	chrX	3727559	3728424	0	unaffected	0	unaffected	unaffected
C01C4.2	chrX	3716300	3718629	0	unaffected	0	unaffected	unaffected
C01C4.3	chrX	3706728	3713318	0	unaffected	0	unaffected	unaffected
C01C7.1	chrIV	12622060	12630999	0	unaffected	0	unaffected	unaffected
C01F1.1	chrII	4301608	4305289	0	unaffected	0	unaffected	unaffected
C01F1.2	chrII	4299659	4301276	0	unaffected	0	unaffected	unaffected
C01F1.3	chrII	4295102	4299213	0	unaffected	0	unaffected	unaffected
C01F1.4	chrII	4276215	4279270	0	unaffected	0	unaffected	unaffected
C01F1.5	chrII	4279790	4281830	0	unaffected	0	unaffected	unaffected
C01F1.6	chrII	4282220	4288212	0	unaffected	0	unaffected	unaffected
C01F4.2	chrI	4850682	4867826	0	unaffected	0	unaffected	unaffected
C01F6.1	chrIV	9096824	9099472	0	unaffected	0	unaffected	unaffected
C01F6.2	chrIV	9099247	9101570	0	unaffected	0	unaffected	unaffected
C01F6.4	chrIV	9104950	9107594	0	unaffected	0	unaffected	unaffected
C01F6.5	chrIV	9108915	9109736	0	unaffected	0	unaffected	unaffected
C01F6.6	chrIV	9119081	9130369	0	unaffected	0	unaffected	unaffected
C01F6.8	chrIV	9094531	9095640	0	unaffected	0	unaffected	unaffected
C01F6.9	chrIV	9095738	9096218	0	unaffected	0	unaffected	unaffected
C01G10.1	chrV	15099729	15104787	0	unaffected	0	unaffected	unaffected
C01G10.10	chrV	15079863	15082462	0	unaffected	0	unaffected	unaffected
C01G10.11	chrV	15071506	15080135	0	unaffected	0	unaffected	unaffected
C01G10.12	chrV	15068672	15069490	0	unaffected	0	unaffected	unaffected
C01G10.14	chrV	15105358	15105910	0	unaffected	0	unaffected	unaffected
C01G10.15	chrV	15086933	15087279	0	unaffected	0	unaffected	unaffected
C01G10.16	chrV	15092948	15094321	0	unaffected	0	unaffected	unaffected
C01G10.17	chrV	15090739	15091102	0	unaffected	0	unaffected	unaffected
C01G10.2	chrV	15097656	15099537	0	unaffected	0	unaffected	unaffected
C01G10.3	chrV	15095031	15097435	0	unaffected	0	unaffected	unaffected
C01G10.4	chrV	15089737	15090004	0	unaffected	0	unaffected	unaffected
C01G10.5	chrV	15089084	15089482	0	unaffected	0	unaffected	unaffected
C01G10.6	chrV	15087638	15088319	0	unaffected	0	unaffected	unaffected
C01G10.7	chrV	15085729	15087047	0	unaffected	0	unaffected	unaffected
C01G10.8	chrV	15084040	15085368	0	unaffected	0	unaffected	unaffected
C01G10.9	chrV	15082746	15084074	0	unaffected	0	unaffected	unaffected
C01G12.1	chrII	14573539	14576487	0	unaffected	0	unaffected	unaffected
C01G12.10	chrII	14580255	14580968	0	unaffected	0	unaffected	unaffected
C01G12.11	chrII	14580817	14581202	0	unaffected	0	unaffected	unaffected
C01G12.13	chrII	14576881	14578000	0	unaffected	0	unaffected	unaffected
C01G12.2	chrII	14578209	14578522	0	unaffected	0	unaffected	unaffected
C01G12.3	chrII	14581389	14582285	0	unaffected	0	unaffected	unaffected
C01G12.5	chrII	14586451	14587432	0	unaffected	0	unaffected	unaffected
C01G12.6	chrII	14587881	14588186	0	unaffected	0	unaffected	unaffected
C01G12.7	chrII	14588545	14591818	0	unaffected	0	unaffected	unaffected
C01G12.8	chrII	14593448	14597565	0	unaffected	0	unaffected	unaffected
C01G12.9	chrII	14578943	14580023	0	unaffected	0	unaffected	unaffected
C01G5.2	chrIV	6526712	6529791	0	unaffected	0	unaffected	unaffected
C01G5.3	chrIV	6536167	6538989	0	unaffected	0	unaffected	unaffected
C01G5.4	chrIV	6531738	6535666	0	unaffected	0	unaffected	unaffected
C01G5.5	chrIV	6524596	6526485	0	unaffected	0	unaffected	unaffected
C01G5.6	chrIV	6522862	6524557	0	unaffected	0	unaffected	unaffected
C01G5.7	chrIV	6518162	6519023	0	unaffected	0	unaffected	unaffected
C01G5.8	chrIV	6548839	6552556	0	unaffected	0	unaffected	unaffected
C01G5.9	chrIV	6519963	6522292	0	unaffected	0	unaffected	unaffected
C01G6.1	chrII	9258852	9261934	0	unaffected	0	unaffected	unaffected
C01G6.2	chrII	9267275	9268243	0	unaffected	0	unaffected	unaffected
C01G6.3	chrII	9269831	9271475	0	unaffected	0	unaffected	unaffected
C01G6.4	chrII	9271201	9272984	0	unaffected	0	unaffected	unaffected
C01G6.5	chrII	9274848	9280038	0	unaffected	0	unaffected	unaffected
C01G6.6	chrII	9285633	9289076	0	unaffected	0	unaffected	unaffected
C01G6.7	chrII	9291956	9293981	0	unaffected	0	unaffected	unaffected
C01G6.8	chrII	9295855	9310242	0	unaffected	0	unaffected	unaffected
C01G6.9	chrII	9293976	9295693	0	unaffected	0	unaffected	unaffected
C01G8.1	chrI	5272848	5274325	0	unaffected	0	unaffected	unaffected
C01G8.2	chrI	5274698	5278711	0	unaffected	0	unaffected	unaffected
C01G8.3	chrI	5278806	5281519	0	unaffected	0	unaffected	unaffected
C01G8.4	chrI	5282085	5283944	0	unaffected	0	unaffected	unaffected
C01G8.5	chrI	5284059	5291608	0	unaffected	0	unaffected	unaffected
C01G8.6	chrI	5298757	5300334	0	unaffected	0	unaffected	unaffected
C01G8.9	chrI	5300953	5310917	0	unaffected	0	unaffected	unaffected
C01H6.1	chrI	7202180	7203506	0	unaffected	0	unaffected	unaffected
C01H6.2	chrI	7204542	7207715	0	unaffected	0	unaffected	unaffected
C01H6.3	chrI	7208024	7209864	0	unaffected	0	unaffected	unaffected
C01H6.4	chrI	7210540	7212697	0	unaffected	0	unaffected	unaffected
C01H6.5	chrI	7214742	7221804	0	unaffected	0	unaffected	unaffected
C01H6.6	chrI	7222048	7224133	0	unaffected	0	unaffected	unaffected
C01H6.7	chrI	7224653	7227763	0	unaffected	0	unaffected	unaffected
C01H6.8	chrI	7227861	7229433	0	unaffected	0	unaffected	unaffected
C01H6.9	chrI	7229415	7233118	0	unaffected	0	unaffected	unaffected
C02A12.1	chrV	3467449	3468498	0	unaffected	0	unaffected	unaffected
C02A12.10	chrV	3483087	3484778	0	unaffected	0	unaffected	unaffected
C02A12.4	chrV	3481415	3482599	0	unaffected	0	unaffected	unaffected
C02A12.5	chrV	3485545	3486954	0	unaffected	0	unaffected	unaffected
C02A12.8	chrV	3471866	3475118	0	unaffected	0	unaffected	unaffected
C02B10.1	chrIV	5086324	5088870	0	unaffected	0	unaffected	unaffected
C02B10.2	chrIV	5090281	5091101	0	unaffected	0	unaffected	unaffected
C02B10.3	chrIV	5092799	5103273	0	unaffected	0	unaffected	unaffected
C02B10.4	chrIV	5091575	5092800	0	unaffected	0	unaffected	unaffected
C02B10.5	chrIV	5083294	5086879	0	unaffected	0	unaffected	unaffected
C02B8.1	chrX	8147660	8148539	0	unaffected	0	unaffected	unaffected
C02B8.2	chrX	8144383	8144978	0	unaffected	0	unaffected	unaffected
C02B8.3	chrX	8139472	8140184	0	unaffected	0	unaffected	unaffected
C02B8.4	chrX	8116586	8120057	0	unaffected	0	unaffected	unaffected
C02B8.5	chrX	8120360	8125707	0	unaffected	0	unaffected	unaffected
C02B8.6	chrX	8133099	8136279	0	unaffected	0	unaffected	unaffected
C02C2.1	chrIII	7873714	7877041	0	unaffected	0	unaffected	unaffected
C02C2.3	chrIII	7866442	7868661	0	unaffected	0	unaffected	unaffected
C02C2.4	chrIII	7862512	7865222	0	unaffected	0	unaffected	unaffected
C02C2.5	chrIII	7877146	7878774	0	unaffected	0	unaffected	unaffected
C02D5.1	chrIII	8561104	8562892	0	unaffected	0	unaffected	unaffected
C02D5.2	chrIII	8557254	8559114	0	unaffected	0	unaffected	unaffected
C02D5.3	chrIII	8554691	8555741	0	unaffected	0	unaffected	unaffected
C02D5.4	chrIII	8552472	8553757	0	unaffected	0	unaffected	unaffected
C02E11.1	chrV	1042692	1048583	0	unaffected	0	unaffected	unaffected
C02E7.1	chrV	4934723	4939071	0	unaffected	0	unaffected	unaffected
C02E7.10	chrV	4930802	4933013	0	unaffected	0	unaffected	unaffected
C02E7.13	chrV	4943101	4944305	0	unaffected	0	unaffected	unaffected
C02E7.2	chrV	4926656	4928181	0	unaffected	0	unaffected	unaffected
C02E7.3	chrV	4924903	4926210	0	unaffected	0	unaffected	unaffected
C02E7.4	chrV	4923277	4924580	0	unaffected	0	unaffected	unaffected
C02E7.5	chrV	4921087	4922602	0	unaffected	0	unaffected	unaffected
C02E7.6	chrV	4919192	4919567	0	unaffected	0	unaffected	unaffected
C02E7.7	chrV	4918139	4918571	0	unaffected	0	unaffected	unaffected
C02F12.1	chrX	3681154	3684219	0	unaffected	0	unaffected	unaffected
C02F12.10	chrX	3672263	3673905	0	unaffected	0	unaffected	unaffected
C02F12.3	chrX	3668086	3668929	0	unaffected	0	unaffected	unaffected
C02F12.4	chrX	3674029	3678546	0	unaffected	0	unaffected	unaffected
C02F12.5	chrX	3670359	3672045	0	unaffected	0	unaffected	unaffected
C02F12.7	chrX	3684210	3689194	0	unaffected	0	unaffected	unaffected
C02F12.8	chrX	3690153	3693225	0	unaffected	0	unaffected	unaffected
C02F12.9	chrX	3696889	3700794	0	unaffected	0	unaffected	unaffected
C02F4.1	chrIV	10484089	10492932	0	unaffected	0	unaffected	unaffected
C02F4.2	chrIV	10492865	10501579	0	unaffected	0	unaffected	unaffected
C02F4.4	chrIV	10513869	10515263	0	unaffected	0	unaffected	unaffected
C02F5.1	chrIII	8250564	8254251	0	unaffected	0	unaffected	unaffected
C02F5.10	chrIII	8248613	8249410	0	unaffected	0	unaffected	unaffected
C02F5.11	chrIII	8236845	8237822	0	unaffected	0	unaffected	unaffected
C02F5.12	chrIII	8240806	8242932	0	unaffected	0	unaffected	unaffected
C02F5.13	chrIII	8247276	8248745	0	unaffected	0	unaffected	unaffected
C02F5.14	chrIII	8234451	8235458	0	unaffected	0	unaffected	unaffected
C02F5.2	chrIII	8249565	8250122	0	unaffected	0	unaffected	unaffected
C02F5.3	chrIII	8245817	8247188	0	unaffected	0	unaffected	unaffected
C02F5.4	chrIII	8244371	8245723	0	unaffected	0	unaffected	unaffected
C02F5.5	chrIII	8236074	8236835	0	unaffected	0	unaffected	unaffected
C02F5.6	chrIII	8232577	8234463	0	unaffected	0	unaffected	unaffected
C02F5.7	chrIII	8229653	8233595	0	unaffected	0	unaffected	unaffected
C02F5.8	chrIII	8237923	8239352	0	unaffected	0	unaffected	unaffected
C02F5.9	chrIII	8243047	8244023	0	unaffected	0	unaffected	unaffected
C02G6.1	chrV	5876352	5879925	0	unaffected	0	unaffected	unaffected
C02G6.2	chrV	5872066	5874897	0	unaffected	0	unaffected	unaffected
C02G6.3	chrV	5881093	5882433	0	unaffected	0	unaffected	unaffected
C02H6.1	chrV	7388370	7389852	0	unaffected	0	unaffected	unaffected
C02H6.2	chrV	7390507	7392068	0	unaffected	0	unaffected	unaffected
C02H7.1	chrX	763767	766732	0	unaffected	0	unaffected	unaffected
C02H7.2	chrX	731158	735671	0	unaffected	0	unaffected	unaffected
C02H7.3	chrX	751209	759731	0	unaffected	0	unaffected	unaffected
C03A3.1	chrX	11257295	11260160	0	unaffected	0	unaffected	unaffected
C03A3.2	chrX	11262780	11266258	0	unaffected	0	unaffected	unaffected
C03A3.3	chrX	11267325	11268966	0	unaffected	0	unaffected	unaffected
C03A7.10	chrV	5170897	5172917	0	unaffected	0	unaffected	unaffected
C03A7.11	chrV	5175009	5177240	0	unaffected	0	unaffected	unaffected
C03A7.12	chrV	5178319	5181440	0	unaffected	0	unaffected	unaffected
C03A7.13	chrV	5191113	5192515	0	unaffected	0	unaffected	unaffected
C03A7.14	chrV	5192976	5194592	0	unaffected	0	unaffected	unaffected
C03A7.2	chrV	5181895	5183701	0	unaffected	0	unaffected	unaffected
C03A7.4	chrV	5158607	5159882	0	unaffected	0	unaffected	unaffected
C03A7.5	chrV	5154041	5155501	0	unaffected	0	unaffected	unaffected
C03A7.7	chrV	5160586	5161877	0	unaffected	0	unaffected	unaffected
C03A7.8	chrV	5163379	5164743	0	unaffected	0	unaffected	unaffected
C03A7.9	chrV	5168258	5169670	0	unaffected	0	unaffected	unaffected
C03B1.1	chrX	6373611	6375555	0	unaffected	0	unaffected	unaffected
C03B1.10	chrX	6357710	6357919	0	unaffected	0	unaffected	unaffected
C03B1.12	chrX	6376400	6377651	0	unaffected	0	unaffected	unaffected
C03B1.13	chrX	6335238	6337787	0	unaffected	0	unaffected	unaffected
C03B1.14	chrX	6359371	6360724	0	unaffected	0	unaffected	unaffected
C03B1.2	chrX	6367577	6373121	0	unaffected	0	unaffected	unaffected
C03B1.3	chrX	6365976	6366795	0	unaffected	0	unaffected	unaffected
C03B1.4	chrX	6364459	6365681	0	unaffected	0	unaffected	unaffected
C03B1.5	chrX	6355548	6357745	0	unaffected	0	unaffected	unaffected
C03B1.6	chrX	6350150	6351840	0	unaffected	0	unaffected	unaffected
C03B1.7	chrX	6342119	6345993	0	unaffected	0	unaffected	unaffected
C03B1.9	chrX	6346322	6347077	0	unaffected	0	unaffected	unaffected
C03B8.2	chrIII	7715425	7716381	0	unaffected	0	unaffected	unaffected
C03B8.3	chrIII	7712265	7717253	0	unaffected	0	unaffected	unaffected
C03B8.4	chrIII	7700068	7709407	0	unaffected	0	unaffected	unaffected
C03C10.1	chrIII	4083977	4086618	0	unaffected	0	unaffected	unaffected
C03C10.2	chrIII	4091051	4093254	0	unaffected	0	unaffected	unaffected
C03C10.3	chrIII	4093279	4094899	0	unaffected	0	unaffected	unaffected
C03C10.4	chrIII	4096874	4098107	0	unaffected	0	unaffected	unaffected
C03C10.5	chrIII	4090265	4090532	0	unaffected	0	unaffected	unaffected
C03C10.7	chrIII	4096018	4097114	0	unaffected	0	unaffected	unaffected
C03C10.9	chrIII	4089777	4089912	0	unaffected	0	unaffected	unaffected
C03C11.1	chrI	10014720	10015487	0	unaffected	0	unaffected	unaffected
C03C11.2	chrI	10016767	10018105	0	unaffected	0	unaffected	unaffected
C03D6.1	chrI	9668469	9670706	0	unaffected	0	unaffected	unaffected
C03D6.3	chrI	9665245	9668655	0	unaffected	0	unaffected	unaffected
C03D6.4	chrI	9660165	9665135	0	unaffected	0	unaffected	unaffected
C03D6.5	chrI	9658264	9660064	0	unaffected	0	unaffected	unaffected
C03D6.6	chrI	9657048	9657841	0	unaffected	0	unaffected	unaffected
C03D6.8	chrI	9669403	9670132	0	unaffected	0	unaffected	unaffected
C03E10.3	chrV	11286959	11288208	0	unaffected	0	unaffected	unaffected
C03E10.4	chrV	11282551	11286024	0	unaffected	0	unaffected	unaffected
C03E10.5	chrV	11273129	11278141	0	unaffected	0	unaffected	unaffected
C03E10.6	chrV	11271332	11272451	0	unaffected	0	unaffected	unaffected
C03F11.1	chrX	5390697	5394108	0	unaffected	0	unaffected	unaffected
C03F11.2	chrX	5394530	5396896	0	unaffected	0	unaffected	unaffected
C03F11.3	chrX	5397643	5400552	0	unaffected	0	unaffected	unaffected
C03F11.4	chrX	5401452	5406411	0	unaffected	0	unaffected	unaffected
C03G5.1	chrX	8542813	8545974	0	unaffected	0	unaffected	unaffected
C03G5.13	chrX	8541092	8541443	0	unaffected	0	unaffected	unaffected
C03G5.2	chrX	8541811	8542231	0	unaffected	0	unaffected	unaffected
C03G5.7	chrX	8528196	8531023	0	unaffected	0	unaffected	unaffected
C03G5.8	chrX	8534616	8535053	0	unaffected	0	unaffected	unaffected
C03G6.10	chrV	7342169	7343818	0	unaffected	0	unaffected	unaffected
C03G6.12	chrV	7348192	7350049	0	unaffected	0	unaffected	unaffected
C03G6.13	chrV	7354457	7356766	0	unaffected	0	unaffected	unaffected
C03G6.15	chrV	7362297	7364186	0	unaffected	0	unaffected	unaffected
C03G6.17	chrV	7379735	7381066	0	unaffected	0	unaffected	unaffected
C03G6.18	chrV	7382002	7383291	0	unaffected	0	unaffected	unaffected
C03G6.19	chrV	7384213	7386288	0	unaffected	0	unaffected	unaffected
C03G6.3	chrV	7369741	7372113	0	unaffected	0	unaffected	unaffected
C03G6.5	chrV	7365224	7365906	0	unaffected	0	unaffected	unaffected
C03G6.6	chrV	7357419	7358864	0	unaffected	0	unaffected	unaffected
C03G6.8	chrV	7346671	7348117	0	unaffected	0	unaffected	unaffected
C03G6.9	chrV	7344042	7345216	0	unaffected	0	unaffected	unaffected
C03H5.1	chrII	402659	404235	0	unaffected	0	unaffected	unaffected
C03H5.2	chrII	388832	392737	0	unaffected	0	unaffected	unaffected
C03H5.3	chrII	386193	387920	0	unaffected	0	unaffected	unaffected
C03H5.4	chrII	375249	375835	0	unaffected	0	unaffected	unaffected
C03H5.5	chrII	382272	385354	0	unaffected	0	unaffected	unaffected
C03H5.6	chrII	392813	399976	0	unaffected	0	unaffected	unaffected
C03H5.7	chrII	380572	382344	0	unaffected	0	unaffected	unaffected
C04A2.1	chrII	6848016	6851484	0	unaffected	0	unaffected	unaffected
C04A2.3	chrII	6835037	6847865	0	unaffected	0	unaffected	unaffected
C04A2.7	chrII	6853420	6858255	0	unaffected	0	unaffected	unaffected
C04C3.1	chrIV	3428896	3430330	0	unaffected	0	unaffected	unaffected
C04C3.2	chrIV	3415679	3419231	0	unaffected	0	unaffected	unaffected
C04C3.3	chrIV	3399666	3403904	0	unaffected	0	unaffected	unaffected
C04C3.5	chrIV	3396577	3399120	0	unaffected	0	unaffected	unaffected
C04C3.6	chrIV	3419809	3422604	0	unaffected	0	unaffected	unaffected
C04C3.9	chrIV	3428084	3428531	0	unaffected	0	unaffected	unaffected
C04D8.1	chrIII	8494940	8518803	0	unaffected	0	unaffected	unaffected
C04E12.11	chrV	3386487	3388153	0	unaffected	0	unaffected	unaffected
C04E12.12	chrV	3389326	3390949	0	unaffected	0	unaffected	unaffected
C04E12.2	chrV	3368069	3369874	0	unaffected	0	unaffected	unaffected
C04E12.4	chrV	3362780	3368318	0	unaffected	0	unaffected	unaffected
C04E12.5	chrV	3358595	3361090	0	unaffected	0	unaffected	unaffected
C04E12.7	chrV	3355976	3357190	0	unaffected	0	unaffected	unaffected
C04E12.8	chrV	3370938	3372770	0	unaffected	0	unaffected	unaffected
C04E6.10	chrV	5904899	5906335	0	unaffected	0	unaffected	unaffected
C04E6.11	chrV	5914077	5917831	0	unaffected	0	unaffected	unaffected
C04E6.13	chrV	5912739	5913740	0	unaffected	0	unaffected	unaffected
C04E6.2	chrV	5922527	5924280	0	unaffected	0	unaffected	unaffected
C04E6.5	chrV	5902115	5904829	0	unaffected	0	unaffected	unaffected
C04E6.6	chrV	5895370	5898585	0	unaffected	0	unaffected	unaffected
C04E6.7	chrV	5893299	5895196	0	unaffected	0	unaffected	unaffected
C04E6.8	chrV	5882647	5883820	0	unaffected	0	unaffected	unaffected
C04E7.1	chrX	358091	360198	0	unaffected	0	unaffected	unaffected
C04E7.2	chrX	353619	357934	0	unaffected	0	unaffected	unaffected
C04E7.3	chrX	344126	346289	0	unaffected	0	unaffected	unaffected
C04E7.4	chrX	334309	341232	0	unaffected	0	unaffected	unaffected
C04E7.5	chrX	360778	362966	0	unaffected	0	unaffected	unaffected
C04F1.1	chrI	5726375	5729310	0	unaffected	0	unaffected	unaffected
C04F1.3	chrI	5716678	5725359	0	unaffected	0	unaffected	unaffected
C04F12.1	chrI	9673657	9678544	0	unaffected	0	unaffected	unaffected
C04F12.10	chrI	9711057	9712757	0	unaffected	0	unaffected	unaffected
C04F12.12	chrI	9694612	9695203	0	unaffected	0	unaffected	unaffected
C04F12.3	chrI	9685472	9688639	0	unaffected	0	unaffected	unaffected
C04F12.4	chrI	9689175	9690118	0	unaffected	0	unaffected	unaffected
C04F12.5	chrI	9690088	9690548	0	unaffected	0	unaffected	unaffected
C04F12.7	chrI	9695698	9696753	0	unaffected	0	unaffected	unaffected
C04F12.8	chrI	9697584	9699546	0	unaffected	0	unaffected	unaffected
C04F12.9	chrI	9710078	9710758	0	unaffected	0	unaffected	unaffected
C04F2.1	chrV	7497720	7499036	0	unaffected	0	unaffected	unaffected
C04F2.4	chrV	7501716	7504352	0	unaffected	0	unaffected	unaffected
C04F5.1	chrV	5119954	5126901	0	unaffected	0	unaffected	unaffected
C04F5.2	chrV	5093699	5096262	0	unaffected	0	unaffected	unaffected
C04F5.3	chrV	5094768	5098892	0	unaffected	0	unaffected	unaffected
C04F5.4	chrV	5100064	5102102	0	unaffected	0	unaffected	unaffected
C04F5.5	chrV	5103026	5105019	0	unaffected	0	unaffected	unaffected
C04F5.6	chrV	5105748	5107901	0	unaffected	0	unaffected	unaffected
C04F5.7	chrV	5107999	5110774	0	unaffected	0	unaffected	unaffected
C04F5.8	chrV	5111481	5113741	0	unaffected	0	unaffected	unaffected
C04F5.9	chrV	5114729	5119194	0	unaffected	0	unaffected	unaffected
C04F6.1	chrX	3403456	3408591	0	unaffected	0	unaffected	unaffected
C04F6.2	chrX	3397137	3397454	0	unaffected	0	unaffected	unaffected
C04F6.3	chrX	3397593	3400007	0	unaffected	0	unaffected	unaffected
C04F6.4	chrX	3408649	3411669	0	unaffected	0	unaffected	unaffected
C04F6.5	chrX	3412869	3414693	0	unaffected	0	unaffected	unaffected
C04F6.7	chrX	3416874	3419200	0	unaffected	0	unaffected	unaffected
C04G2.1	chrIV	10088345	10089868	0	unaffected	0	unaffected	unaffected
C04G2.10	chrIV	10115368	10118062	0	unaffected	0	unaffected	unaffected
C04G2.11	chrIV	10119437	10122367	0	unaffected	0	unaffected	unaffected
C04G2.2	chrIV	10090712	10092358	0	unaffected	0	unaffected	unaffected
C04G2.4	chrIV	10095378	10095830	0	unaffected	0	unaffected	unaffected
C04G2.5	chrIV	10094178	10095204	0	unaffected	0	unaffected	unaffected
C04G2.6	chrIV	10097186	10106535	0	unaffected	0	unaffected	unaffected
C04G2.7	chrIV	10107013	10110391	0	unaffected	0	unaffected	unaffected
C04G2.8	chrIV	10110325	10111556	0	unaffected	0	unaffected	unaffected
C04G2.9	chrIV	10112868	10114209	0	unaffected	0	unaffected	unaffected
C04G6.1	chrII	5104108	5108892	0	unaffected	0	unaffected	unaffected
C04G6.10	chrII	5101975	5102638	0	unaffected	0	unaffected	unaffected
C04G6.13	chrII	5094236	5095362	0	unaffected	0	unaffected	unaffected
C04G6.2	chrII	5093227	5094206	0	unaffected	0	unaffected	unaffected
C04G6.3	chrII	5083839	5091628	0	unaffected	0	unaffected	unaffected
C04G6.4	chrII	5081486	5083433	0	unaffected	0	unaffected	unaffected
C04G6.5	chrII	5085776	5086113	0	unaffected	0	unaffected	unaffected
C04G6.6	chrII	5099428	5100233	0	unaffected	0	unaffected	unaffected
C04G6.7	chrII	5100402	5101774	0	unaffected	0	unaffected	unaffected
C04H4.1	chrII	7958792	7960186	0	unaffected	0	unaffected	unaffected
C04H5.1	chrII	14534222	14535820	0	unaffected	0	unaffected	unaffected
C04H5.2	chrII	14535743	14537504	0	unaffected	0	unaffected	unaffected
C04H5.3	chrII	14540743	14548716	0	unaffected	0	unaffected	unaffected
C04H5.6	chrII	14552429	14561521	0	unaffected	0	unaffected	unaffected
C04H5.8	chrII	14550837	14552410	0	unaffected	0	unaffected	unaffected
C05A2.1	chrV	10702528	10704889	0	unaffected	0	unaffected	unaffected
C05A9.1	chrX	10854254	10859228	0	unaffected	0	unaffected	unaffected
C05A9.2	chrX	10842616	10844609	0	unaffected	0	unaffected	unaffected
C05B10.1	chrIV	6842952	6844955	0	unaffected	0	unaffected	unaffected
C05B5.1	chrIII	9987651	9988371	0	unaffected	0	unaffected	unaffected
C05B5.11	chrIII	10004375	10004875	0	unaffected	0	unaffected	unaffected
C05B5.2	chrIII	9998452	10000427	0	unaffected	0	unaffected	unaffected
C05B5.3	chrIII	9996121	9997831	0	unaffected	0	unaffected	unaffected
C05B5.4	chrIII	9993795	9996146	0	unaffected	0	unaffected	unaffected
C05B5.5	chrIII	10001285	10003024	0	unaffected	0	unaffected	unaffected
C05B5.6	chrIII	10007882	10010087	0	unaffected	0	unaffected	unaffected
C05B5.7	chrIII	10014502	10016444	0	unaffected	0	unaffected	unaffected
C05B5.8	chrIII	10005366	10006694	0	unaffected	0	unaffected	unaffected
C05C10.1	chrII	9918065	9920509	0	unaffected	0	unaffected	unaffected
C05C10.2	chrII	9922188	9930771	0	unaffected	0	unaffected	unaffected
C05C10.3	chrII	9934344	9936836	0	unaffected	0	unaffected	unaffected
C05C10.4	chrII	9931785	9934384	0	unaffected	0	unaffected	unaffected
C05C10.5	chrII	9939094	9940278	0	unaffected	0	unaffected	unaffected
C05C10.6	chrII	9940701	9943988	0	unaffected	0	unaffected	unaffected
C05C10.7	chrII	9938046	9938904	0	unaffected	0	unaffected	unaffected
C05C10.8	chrII	9917062	9917884	0	unaffected	0	unaffected	unaffected
C05C12.1	chrIV	11253962	11255698	0	unaffected	0	unaffected	unaffected
C05C12.3	chrIV	11248879	11259443	0	unaffected	0	unaffected	unaffected
C05C12.4	chrIV	11246425	11248030	0	unaffected	0	unaffected	unaffected
C05C12.5	chrIV	11260308	11261148	0	unaffected	0	unaffected	unaffected
C05C12.6	chrIV	11231647	11233101	0	unaffected	0	unaffected	unaffected
C05C8.1	chrV	7239750	7241348	0	unaffected	0	unaffected	unaffected
C05C8.2	chrV	7231162	7232731	0	unaffected	0	unaffected	unaffected
C05C8.3	chrV	7225350	7226296	0	unaffected	0	unaffected	unaffected
C05C8.4	chrV	7226356	7230830	0	unaffected	0	unaffected	unaffected
C05C8.5	chrV	7232654	7234810	0	unaffected	0	unaffected	unaffected
C05C8.6	chrV	7234905	7237112	0	unaffected	0	unaffected	unaffected
C05C8.7	chrV	7242888	7247279	0	unaffected	0	unaffected	unaffected
C05C8.8	chrV	7252306	7255139	0	unaffected	0	unaffected	unaffected
C05C8.9	chrV	7237374	7239644	0	unaffected	0	unaffected	unaffected
C05C9.1	chrX	11160914	11163620	0	unaffected	0	unaffected	unaffected
C05C9.2	chrX	11152998	11157577	0	unaffected	0	unaffected	unaffected
C05C9.3	chrX	11142904	11152754	0	unaffected	0	unaffected	unaffected
C05D10.1	chrIII	6080511	6084686	0	unaffected	0	unaffected	unaffected
C05D10.2	chrIII	6067805	6072030	0	unaffected	0	unaffected	unaffected
C05D10.3	chrIII	6084621	6087404	0	unaffected	0	unaffected	unaffected
C05D10.4	chrIII	6088633	6102810	0	unaffected	0	unaffected	unaffected
C05D11.1	chrIII	6436555	6439906	0	unaffected	0	unaffected	unaffected
C05D11.10	chrIII	6430984	6431740	0	unaffected	0	unaffected	unaffected
C05D11.11	chrIII	6440092	6442948	0	unaffected	0	unaffected	unaffected
C05D11.12	chrIII	6444639	6446891	0	unaffected	0	unaffected	unaffected
C05D11.13	chrIII	6442629	6443919	0	unaffected	0	unaffected	unaffected
C05D11.2	chrIII	6433184	6436448	0	unaffected	0	unaffected	unaffected
C05D11.3	chrIII	6432128	6433101	0	unaffected	0	unaffected	unaffected
C05D11.4	chrIII	6407075	6409981	0	unaffected	0	unaffected	unaffected
C05D11.5	chrIII	6409699	6411506	0	unaffected	0	unaffected	unaffected
C05D11.6	chrIII	6411526	6414940	0	unaffected	0	unaffected	unaffected
C05D11.7	chrIII	6415718	6421659	0	unaffected	0	unaffected	unaffected
C05D11.8	chrIII	6422405	6427252	0	unaffected	0	unaffected	unaffected
C05D11.9	chrIII	6427477	6430882	0	unaffected	0	unaffected	unaffected
C05D12.1	chrII	11411817	11415708	0	unaffected	0	unaffected	unaffected
C05D12.2	chrII	11418249	11423317	0	unaffected	0	unaffected	unaffected
C05D12.3	chrII	11424685	11430535	0	unaffected	0	unaffected	unaffected
C05D12.4	chrII	11429919	11432702	0	unaffected	0	unaffected	unaffected
C05D12.5	chrII	11434156	11434894	0	unaffected	0	unaffected	unaffected
C05D12.7	chrII	11410049	11411911	0	unaffected	0	unaffected	unaffected
C05D2.1	chrIII	5624971	5632447	0	unaffected	0	unaffected	unaffected
C05D2.10	chrIII	5597913	5600018	0	unaffected	0	unaffected	unaffected
C05D2.3	chrIII	5614929	5617230	0	unaffected	0	unaffected	unaffected
C05D2.4	chrIII	5612231	5614637	0	unaffected	0	unaffected	unaffected
C05D2.5	chrIII	5604416	5607511	0	unaffected	0	unaffected	unaffected
C05D2.6	chrIII	5600339	5603722	0	unaffected	0	unaffected	unaffected
C05D2.8	chrIII	5607465	5610304	0	unaffected	0	unaffected	unaffected
C05D9.1	chrX	1128980	1132922	0	unaffected	0	unaffected	unaffected
C05D9.2	chrX	1125166	1128285	0	unaffected	0	unaffected	unaffected
C05D9.3	chrX	1111899	1116791	0	unaffected	0	unaffected	unaffected
C05D9.4	chrX	1108063	1108413	0	unaffected	0	unaffected	unaffected
C05D9.5	chrX	1104208	1106244	0	unaffected	0	unaffected	unaffected
C05D9.7	chrX	1117193	1119404	0	unaffected	0	unaffected	unaffected
C05D9.9	chrX	1122417	1124231	0	unaffected	0	unaffected	unaffected
C05E11.1	chrX	4588738	4590420	0	unaffected	0	unaffected	unaffected
C05E11.2	chrX	4586889	4587966	0	unaffected	0	unaffected	unaffected
C05E11.3	chrX	4579479	4581630	0	unaffected	0	unaffected	unaffected
C05E11.4	chrX	4571421	4573888	0	unaffected	0	unaffected	unaffected
C05E11.5	chrX	4565275	4569534	0	unaffected	0	unaffected	unaffected
C05E11.6	chrX	4562168	4562811	0	unaffected	0	unaffected	unaffected
C05E11.7	chrX	4581570	4585638	0	unaffected	0	unaffected	unaffected
C05E11.8	chrX	4591253	4592477	0	unaffected	0	unaffected	unaffected
C05E4.1	chrV	762734	764658	0	unaffected	0	unaffected	unaffected
C05E4.10	chrV	734420	736272	0	unaffected	0	unaffected	unaffected
C05E4.11	chrV	736803	738871	0	unaffected	0	unaffected	unaffected
C05E4.12	chrV	758039	761979	0	unaffected	0	unaffected	unaffected
C05E4.13	chrV	751326	752780	0	unaffected	0	unaffected	unaffected
C05E4.14	chrV	728309	734280	0	unaffected	0	unaffected	unaffected
C05E4.3	chrV	753334	755049	0	unaffected	0	unaffected	unaffected
C05E4.4	chrV	748344	750468	0	unaffected	0	unaffected	unaffected
C05E4.6	chrV	743648	745476	0	unaffected	0	unaffected	unaffected
C05E4.7	chrV	742120	743274	0	unaffected	0	unaffected	unaffected
C05E4.9	chrV	724207	728104	0	unaffected	0	unaffected	unaffected
C05G6.1	chrIV	627536	633965	0	unaffected	0	unaffected	unaffected
C05H8.1	chrIII	5635436	5654514	0	unaffected	0	unaffected	unaffected
C06A1.1	chrII	10559957	10563349	0	unaffected	0	unaffected	unaffected
C06A1.2	chrII	10568844	10572056	0	unaffected	0	unaffected	unaffected
C06A1.3	chrII	10572203	10574011	0	unaffected	0	unaffected	unaffected
C06A1.5	chrII	10579306	10580552	0	unaffected	0	unaffected	unaffected
C06A1.6	chrII	10564114	10564618	0	unaffected	0	unaffected	unaffected
C06A12.3	chrIV	17427679	17429566	0	unaffected	0	unaffected	unaffected
C06A12.4	chrIV	17432939	17440054	0	unaffected	0	unaffected	unaffected
C06A12.5	chrIV	17429718	17431931	0	unaffected	0	unaffected	unaffected
C06A5.1	chrI	6012059	6021985	0	unaffected	0	unaffected	unaffected
C06A5.10	chrI	5982520	5982971	0	unaffected	0	unaffected	unaffected
C06A5.11	chrI	5991072	5993213	0	unaffected	0	unaffected	unaffected
C06A5.12	chrI	6004654	6007597	0	unaffected	0	unaffected	unaffected
C06A5.2	chrI	6006334	6007326	0	unaffected	0	unaffected	unaffected
C06A5.3	chrI	5986493	5990843	0	unaffected	0	unaffected	unaffected
C06A5.4	chrI	5980792	5981590	0	unaffected	0	unaffected	unaffected
C06A5.5	chrI	5981817	5982454	0	unaffected	0	unaffected	unaffected
C06A5.6	chrI	5978691	5985873	0	unaffected	0	unaffected	unaffected
C06A5.7	chrI	5992664	6001101	0	unaffected	0	unaffected	unaffected
C06A5.8	chrI	6008079	6009608	0	unaffected	0	unaffected	unaffected
C06A5.9	chrI	6009782	6011525	0	unaffected	0	unaffected	unaffected
C06A6.2	chrIV	7846629	7854550	0	unaffected	0	unaffected	unaffected
C06A6.3	chrIV	7830549	7832428	0	unaffected	0	unaffected	unaffected
C06A6.4	chrIV	7826315	7829289	0	unaffected	0	unaffected	unaffected
C06A6.5	chrIV	7832330	7834663	0	unaffected	0	unaffected	unaffected
C06A6.7	chrIV	7837360	7837973	0	unaffected	0	unaffected	unaffected
C06A8.1	chrII	7773827	7777780	0	unaffected	0	unaffected	unaffected
C06A8.2	chrII	7779289	7781202	0	unaffected	0	unaffected	unaffected
C06A8.3	chrII	7790507	7791517	0	unaffected	0	unaffected	unaffected
C06A8.4	chrII	7783764	7784595	0	unaffected	0	unaffected	unaffected
C06A8.5	chrII	7781526	7783296	0	unaffected	0	unaffected	unaffected
C06A8.6	chrII	7772514	7773860	0	unaffected	0	unaffected	unaffected
C06A8.7	chrII	7763884	7765464	0	unaffected	0	unaffected	unaffected
C06A8.8	chrII	7765309	7771965	0	unaffected	0	unaffected	unaffected
C06A8.9	chrII	7785021	7794267	0	unaffected	0	unaffected	unaffected
C06B3.12	chrV	13924136	13925793	0	unaffected	0	unaffected	unaffected
C06B3.2	chrV	13899498	13902639	0	unaffected	0	unaffected	unaffected
C06B3.3	chrV	13896642	13898474	0	unaffected	0	unaffected	unaffected
C06B3.4	chrV	13906475	13908023	0	unaffected	0	unaffected	unaffected
C06B3.5	chrV	13904596	13905982	0	unaffected	0	unaffected	unaffected
C06B3.6	chrV	13908113	13909499	0	unaffected	0	unaffected	unaffected
C06B3.7	chrV	13909733	13911510	0	unaffected	0	unaffected	unaffected
C06B3.8	chrV	13912065	13915422	0	unaffected	0	unaffected	unaffected
C06B3.9	chrV	13916481	13918037	0	unaffected	0	unaffected	unaffected
C06B8.1	chrV	15479525	15481659	0	unaffected	0	unaffected	unaffected
C06B8.2	chrV	15476045	15478548	0	unaffected	0	unaffected	unaffected
C06B8.4	chrV	15491049	15492752	0	unaffected	0	unaffected	unaffected
C06B8.6	chrV	15496250	15497549	0	unaffected	0	unaffected	unaffected
C06B8.7	chrV	15498724	15511403	0	unaffected	0	unaffected	unaffected
C06B8.8	chrV	15512147	15512755	0	unaffected	0	unaffected	unaffected
C06C3.1	chrII	9358471	9369040	0	unaffected	0	unaffected	unaffected
C06C3.10	chrII	9375799	9377150	0	unaffected	0	unaffected	unaffected
C06C3.12	chrII	9375047	9375789	0	unaffected	0	unaffected	unaffected
C06C3.3	chrII	9369118	9372312	0	unaffected	0	unaffected	unaffected
C06C3.4	chrII	9373231	9374795	0	unaffected	0	unaffected	unaffected
C06C3.6	chrII	9383318	9384936	0	unaffected	0	unaffected	unaffected
C06C3.7	chrII	9385479	9386478	0	unaffected	0	unaffected	unaffected
C06C3.8	chrII	9386524	9390841	0	unaffected	0	unaffected	unaffected
C06C3.9	chrII	9376395	9378223	0	unaffected	0	unaffected	unaffected
C06C6.1	chrV	16010689	16012092	0	unaffected	0	unaffected	unaffected
C06C6.2	chrV	16008311	16009644	0	unaffected	0	unaffected	unaffected
C06C6.3	chrV	16006283	16007585	0	unaffected	0	unaffected	unaffected
C06C6.4	chrV	16002574	16004708	0	unaffected	0	unaffected	unaffected
C06C6.5	chrV	15997758	16000633	0	unaffected	0	unaffected	unaffected
C06C6.6	chrV	15988733	15991587	0	unaffected	0	unaffected	unaffected
C06C6.7	chrV	15992185	15995587	0	unaffected	0	unaffected	unaffected
C06C6.8	chrV	15997115	15997750	0	unaffected	0	unaffected	unaffected
C06C6.9	chrV	15996193	15996725	0	unaffected	0	unaffected	unaffected
C06E1.1	chrIII	8605751	8606424	0	unaffected	0	unaffected	unaffected
[truncated: 16,602 more rows]

## Sheet: ty1916
gene_ID	chr	start	stop	CNV_overlap	CNV_type	CNV_overlap_10kb	CNV_type.10kb	CNV_size
Y34D9A.8	chrI	1019578	1053648	0.0586733	deletion	0	unaffected	less than 10kb
Y34D9A.1	chrI	1019827	1029955	0.197374	deletion	0	unaffected	less than 10kb
W03F11.6	chrI	2160044	2209637	0.0806364	deletion	0	unaffected	less than 10kb
ZK270.2	chrI	14875752	14900319	0.244189	deletion	0	unaffected	less than 10kb
Y48E1B.2	chrII	13533474	13541014	0.265119	deletion	0	unaffected	less than 10kb
Y19D10A.7	chrV	2348213	2350324	1	deletion	1	deletion	greater than 10kb
Y19D10A.11	chrV	2368942	2373701	1	deletion	1	deletion	greater than 10kb
Y19D10A.12	chrV	2375041	2379504	1	deletion	1	deletion	greater than 10kb
C13B7.6	chrV	2421865	2422894	1	deletion	1	deletion	greater than 10kb
F56A4.3	chrV	2453412	2456146	1	deletion	1	deletion	greater than 10kb
C01B4.9	chrV	2483002	2487784	1	deletion	1	deletion	greater than 10kb
C01B4.7	chrV	2494233	2499000	1	deletion	1	deletion	greater than 10kb
C01B4.6	chrV	2501049	2502425	1	deletion	1	deletion	greater than 10kb
Y45G12C.16	chrV	2530144	2531173	1	deletion	1	deletion	greater than 10kb
Y45G12C.2	chrV	2561688	2564707	0.434581	deletion	0.434581	deletion	greater than 10kb
Y59A8B.7	chrV	18043540	18052295	0.490463	deletion	0.490463	deletion	greater than 10kb
Y59A8B.9	chrV	18055940	18060680	1	deletion	1	deletion	greater than 10kb
Y59A8B.8	chrV	18062006	18066281	0.466433	deletion	0.466433	deletion	greater than 10kb
Y113G7A.8	chrV	20075889	20087702	0.338525	deletion	0	unaffected	less than 10kb
C39E6.1	chrX	4738836	4749055	0.78814	deletion	0	unaffected	less than 10kb
ZK973.6	chrI	4321095	4359106	0.60785	duplication	0.60785	duplication	greater than 10kb
ZK973.5	chrI	4359116	4362549	0.257501	duplication	0.257501	duplication	greater than 10kb
Y27F2A.5	chrII	3168769	3170192	0.162333	duplication	0	unaffected	less than 10kb
T12B5.6	chrIII	933452	936056	1	duplication	1	duplication	greater than 10kb
T12B5.7	chrIII	937290	938050	1	duplication	1	duplication	greater than 10kb
T12B5.5	chrIII	938857	939426	1	duplication	1	duplication	greater than 10kb
T12B5.8	chrIII	940867	943447	1	duplication	1	duplication	greater than 10kb
T12B5.10	chrIII	944768	946281	1	duplication	1	duplication	greater than 10kb
T12B5.13	chrIII	947836	949081	1	duplication	1	duplication	greater than 10kb
T12B5.11	chrIII	949315	950600	1	duplication	1	duplication	greater than 10kb
T12B5.4	chrIII	950870	952044	1	duplication	1	duplication	greater than 10kb
T12B5.3	chrIII	952532	953792	1	duplication	1	duplication	greater than 10kb
T12B5.15	chrIII	954283	954641	1	duplication	1	duplication	greater than 10kb
T12B5.14	chrIII	954861	955293	1	duplication	1	duplication	greater than 10kb
T12B5.2	chrIII	956322	957893	1	duplication	1	duplication	greater than 10kb
T12B5.1	chrIII	962292	963515	1	duplication	1	duplication	greater than 10kb
R06B10.1	chrIII	966642	972014	1	duplication	1	duplication	greater than 10kb
R06B10.2	chrIII	973295	980440	0.79846	duplication	0.79846	duplication	greater than 10kb
R06B10.5	chrIII	977374	988437	0.146976	duplication	0.146976	duplication	greater than 10kb
B0524.3	chrIII	1887548	1889682	1	duplication	1	duplication	greater than 10kb
B0524.5	chrIII	1891373	1893833	1	duplication	1	duplication	greater than 10kb
B0524.2	chrIII	1894092	1899847	0.852824	duplication	0.852824	duplication	greater than 10kb
R05D3.6	chrIII	8350346	8350733	1	duplication	1	duplication	greater than 10kb
R05D3.7	chrIII	8351176	8355102	0.464595	duplication	0.464595	duplication	greater than 10kb
Y73B6A.6	chrIV	6704904	6705723	1	duplication	1	duplication	greater than 10kb
Y73B6A.2	chrIV	6733463	6736121	0.202032	duplication	0.202032	duplication	greater than 10kb
C01C7.1	chrIV	12622060	12630999	1	duplication	1	duplication	greater than 10kb
C26H9A.1	chrIV	12640423	12650629	1	duplication	1	duplication	greater than 10kb
C26H9A.2	chrIV	12653465	12674858	1	duplication	1	duplication	greater than 10kb
T23B5.4	chrIV	12675192	12675943	1	duplication	1	duplication	greater than 10kb
T23B5.1	chrIV	12677372	12684357	1	duplication	1	duplication	greater than 10kb
T23B5.3	chrIV	12688631	12703993	1	duplication	1	duplication	greater than 10kb
C27D8.4	chrIV	12704085	12706737	1	duplication	1	duplication	greater than 10kb
C27D8.3	chrIV	12706690	12712291	1	duplication	1	duplication	greater than 10kb
C27D8.2	chrIV	12712746	12714732	1	duplication	1	duplication	greater than 10kb
C27D8.1	chrIV	12717859	12719367	1	duplication	1	duplication	greater than 10kb
T23F6.1	chrIV	12719936	12720871	1	duplication	1	duplication	greater than 10kb
T23F6.2	chrIV	12721332	12722971	1	duplication	1	duplication	greater than 10kb
T23F6.3	chrIV	12723079	12724579	1	duplication	1	duplication	greater than 10kb
T23F6.4	chrIV	12724896	12730075	1	duplication	1	duplication	greater than 10kb
T23F6.5	chrIV	12735210	12741500	1	duplication	1	duplication	greater than 10kb
C36H8.1	chrIV	12743015	12744715	1	duplication	1	duplication	greater than 10kb
C36H8.2	chrIV	12746560	12749698	1	duplication	1	duplication	greater than 10kb
C36H8.3	chrIV	12754534	12757650	1	duplication	1	duplication	greater than 10kb
ZK897.1	chrIV	12773837	12787489	1	duplication	1	duplication	greater than 10kb
F07C6.3	chrIV	12789208	12790383	1	duplication	1	duplication	greater than 10kb
F07C6.2	chrIV	12791146	12791784	1	duplication	1	duplication	greater than 10kb
F07C6.1	chrIV	12793828	12796139	1	duplication	1	duplication	greater than 10kb
F07C6.4	chrIV	12805906	12813004	1	duplication	1	duplication	greater than 10kb
F07C6.4	chrIV	12805906	12813004	1	duplication	1	duplication	greater than 10kb
F07C6.4	chrIV	12817036	12830085	1	duplication	1	duplication	greater than 10kb
F07C6.4	chrIV	12817036	12830085	1	duplication	1	duplication	greater than 10kb
M02B1.4	chrIV	12823796	12825251	1	duplication	1	duplication	greater than 10kb
M02B1.3	chrIV	12836483	12840650	1	duplication	1	duplication	greater than 10kb
M02B1.2	chrIV	12845671	12848043	1	duplication	1	duplication	greater than 10kb
M02B1.1	chrIV	12849481	12853790	1	duplication	1	duplication	greater than 10kb
ZK896.9	chrIV	12855524	12859350	1	duplication	1	duplication	greater than 10kb
ZK896.8	chrIV	12860112	12865911	1	duplication	1	duplication	greater than 10kb
ZK896.7	chrIV	12866091	12869059	1	duplication	1	duplication	greater than 10kb
ZK896.6	chrIV	12869244	12871488	1	duplication	1	duplication	greater than 10kb
ZK896.1	chrIV	12872804	12875336	1	duplication	1	duplication	greater than 10kb
ZK896.5	chrIV	12876959	12879643	1	duplication	1	duplication	greater than 10kb
ZK896.4	chrIV	12880642	12883122	1	duplication	1	duplication	greater than 10kb
K08D8.6	chrIV	12887035	12890486	1	duplication	1	duplication	greater than 10kb
K08D8.1	chrIV	12892488	12893259	1	duplication	1	duplication	greater than 10kb
K08D8.12	chrIV	12893551	12894700	1	duplication	1	duplication	greater than 10kb
K08D8.11	chrIV	12895271	12895376	1	duplication	1	duplication	greater than 10kb
K08D8.7	chrIV	12896673	12898640	1	duplication	1	duplication	greater than 10kb
K08D8.9	chrIV	12899683	12899989	1	duplication	1	duplication	greater than 10kb
K08D8.10	chrIV	12900542	12900873	1	duplication	1	duplication	greater than 10kb
K08D8.3	chrIV	12903950	12906600	1	duplication	1	duplication	greater than 10kb
K08D8.4	chrIV	12907444	12909974	1	duplication	1	duplication	greater than 10kb
K08D8.5	chrIV	12910620	12912112	1	duplication	1	duplication	greater than 10kb
C32H11.1	chrIV	12912765	12914945	1	duplication	1	duplication	greater than 10kb
C32H11.3	chrIV	12918586	12920196	1	duplication	1	duplication	greater than 10kb
C32H11.4	chrIV	12921263	12923266	1	duplication	1	duplication	greater than 10kb
C32H11.5	chrIV	12923500	12924354	1	duplication	1	duplication	greater than 10kb
C32H11.6	chrIV	12925904	12926712	1	duplication	1	duplication	greater than 10kb
C32H11.7	chrIV	12930682	12931490	1	duplication	1	duplication	greater than 10kb
C32H11.9	chrIV	12935026	12936247	1	duplication	1	duplication	greater than 10kb
C32H11.12	chrIV	12940117	12941344	1	duplication	1	duplication	greater than 10kb
F55G11.1	chrIV	12945007	12946553	1	duplication	1	duplication	greater than 10kb
F55G11.10	chrIV	12948745	12950051	1	duplication	1	duplication	greater than 10kb
F55G11.6	chrIV	12958005	12959570	1	duplication	1	duplication	greater than 10kb
F55G11.7	chrIV	12960411	12962096	1	duplication	1	duplication	greater than 10kb
F55G11.8	chrIV	12962783	12964600	1	duplication	1	duplication	greater than 10kb
F55G11.5	chrIV	12965362	12967352	1	duplication	1	duplication	greater than 10kb
F55G11.2	chrIV	12967423	12969265	1	duplication	1	duplication	greater than 10kb
F55G11.4	chrIV	12973611	12975573	1	duplication	1	duplication	greater than 10kb
K10D11.1	chrIV	12976268	12978320	1	duplication	1	duplication	greater than 10kb
K10D11.2	chrIV	12978992	12981916	1	duplication	1	duplication	greater than 10kb
K10D11.3	chrIV	12982095	12986064	1	duplication	1	duplication	greater than 10kb
K10D11.6	chrIV	12986699	12989409	1	duplication	1	duplication	greater than 10kb
K10D11.5	chrIV	12989660	12991780	1	duplication	1	duplication	greater than 10kb
K10D11.4	chrIV	12992132	12994438	1	duplication	1	duplication	greater than 10kb
K10D11.7	chrIV	12994651	12995900	1	duplication	1	duplication	greater than 10kb
F49E11.1	chrIV	13009110	13035922	1	duplication	1	duplication	greater than 10kb
F49E11.2	chrIV	13035930	13038966	1	duplication	1	duplication	greater than 10kb
F49E11.3	chrIV	13042366	13046834	1	duplication	1	duplication	greater than 10kb
F49E11.5	chrIV	13048471	13049811	1	duplication	1	duplication	greater than 10kb
F49E11.6	chrIV	13051352	13052125	1	duplication	1	duplication	greater than 10kb
F49E11.10	chrIV	13057653	13059068	1	duplication	1	duplication	greater than 10kb
F49E11.11	chrIV	13059593	13060671	1	duplication	1	duplication	greater than 10kb
C39E9.2	chrIV	13063979	13065134	1	duplication	1	duplication	greater than 10kb
C39E9.3	chrIV	13065704	13067264	1	duplication	1	duplication	greater than 10kb
C39E9.4	chrIV	13068743	13070266	1	duplication	1	duplication	greater than 10kb
C39E9.5	chrIV	13070454	13071246	1	duplication	1	duplication	greater than 10kb
C39E9.6	chrIV	13071729	13072454	1	duplication	1	duplication	greater than 10kb
C39E9.7	chrIV	13072635	13076716	1	duplication	1	duplication	greater than 10kb
C39E9.8	chrIV	13079455	13082758	1	duplication	1	duplication	greater than 10kb
C39E9.10	chrIV	13086980	13089594	1	duplication	1	duplication	greater than 10kb
C39E9.9	chrIV	13089553	13091043	1	duplication	1	duplication	greater than 10kb
C39E9.11	chrIV	13091159	13093820	1	duplication	1	duplication	greater than 10kb
C39E9.12	chrIV	13093980	13095467	1	duplication	1	duplication	greater than 10kb
C39E9.13	chrIV	13095735	13096977	1	duplication	1	duplication	greater than 10kb
C39E9.14	chrIV	13096958	13098789	1	duplication	1	duplication	greater than 10kb
B0564.1	chrIV	13098953	13100592	1	duplication	1	duplication	greater than 10kb
B0564.7	chrIV	13100688	13104855	1	duplication	1	duplication	greater than 10kb
B0564.11	chrIV	13105298	13106902	1	duplication	1	duplication	greater than 10kb
B0564.2	chrIV	13107632	13111479	1	duplication	1	duplication	greater than 10kb
B0564.3	chrIV	13108115	13109775	1	duplication	1	duplication	greater than 10kb
B0564.4	chrIV	13111495	13113058	1	duplication	1	duplication	greater than 10kb
B0564.10	chrIV	13119071	13124363	1	duplication	1	duplication	greater than 10kb
B0564.9	chrIV	13135219	13138798	1	duplication	1	duplication	greater than 10kb
F09E8.1	chrIV	13141360	13142330	1	duplication	1	duplication	greater than 10kb
F09E8.8	chrIV	13149556	13150401	1	duplication	1	duplication	greater than 10kb
F09E8.2	chrIV	13150393	13154424	1	duplication	1	duplication	greater than 10kb
F09E8.3	chrIV	13155203	13164028	1	duplication	1	duplication	greater than 10kb
F09E8.5	chrIV	13165491	13166731	1	duplication	1	duplication	greater than 10kb
F09E8.6	chrIV	13170519	13173670	1	duplication	1	duplication	greater than 10kb
F09E8.7	chrIV	13174146	13179359	1	duplication	1	duplication	greater than 10kb
F58D2.1	chrIV	13183047	13186958	1	duplication	1	duplication	greater than 10kb
F58D2.4	chrIV	13187979	13189339	1	duplication	1	duplication	greater than 10kb
F58D2.2	chrIV	13189742	13192259	1	duplication	1	duplication	greater than 10kb
C48D1.1	chrIV	13193642	13197358	1	duplication	1	duplication	greater than 10kb
C48D1.2	chrIV	13198255	13206272	1	duplication	1	duplication	greater than 10kb
C48D1.9	chrIV	13207365	13209664	1	duplication	1	duplication	greater than 10kb
C48D1.3	chrIV	13209249	13214542	1	duplication	1	duplication	greater than 10kb
C48D1.5	chrIV	13221936	13223364	1	duplication	1	duplication	greater than 10kb
JC8.2	chrIV	13232918	13236563	1	duplication	1	duplication	greater than 10kb
JC8.13	chrIV	13237247	13239392	1	duplication	1	duplication	greater than 10kb
JC8.3	chrIV	13239563	13240627	1	duplication	1	duplication	greater than 10kb
JC8.6	chrIV	13241027	13243345	1	duplication	1	duplication	greater than 10kb
JC8.4	chrIV	13243650	13244181	1	duplication	1	duplication	greater than 10kb
JC8.5	chrIV	13244297	13247130	1	duplication	1	duplication	greater than 10kb
JC8.7	chrIV	13247236	13251051	1	duplication	1	duplication	greater than 10kb
JC8.8	chrIV	13250652	13252289	1	duplication	1	duplication	greater than 10kb
JC8.14	chrIV	13254200	13255311	1	duplication	1	duplication	greater than 10kb
JC8.12	chrIV	13256060	13259041	1	duplication	1	duplication	greater than 10kb
JC8.16	chrIV	13259147	13261552	1	duplication	1	duplication	greater than 10kb
JC8.10	chrIV	13261531	13272490	1	duplication	1	duplication	greater than 10kb
Y67H2A.1	chrIV	13273872	13282856	1	duplication	1	duplication	greater than 10kb
Y67H2A.10	chrIV	13282962	13289475	1	duplication	1	duplication	greater than 10kb
Y67H2A.2	chrIV	13289761	13297844	1	duplication	1	duplication	greater than 10kb
Y67H2A.4	chrIV	13297620	13300047	1	duplication	1	duplication	greater than 10kb
Y67H2A.5	chrIV	13300154	13300698	1	duplication	1	duplication	greater than 10kb
Y67H2A.6	chrIV	13300801	13303667	1	duplication	1	duplication	greater than 10kb
Y67H2A.7	chrIV	13303721	13310794	1	duplication	1	duplication	greater than 10kb
Y67H2A.8	chrIV	13315617	13318759	1	duplication	1	duplication	greater than 10kb
W02A2.1	chrIV	13323825	13326370	1	duplication	1	duplication	greater than 10kb
W02A2.2	chrIV	13328334	13329295	1	duplication	1	duplication	greater than 10kb
W02A2.3	chrIV	13329282	13331364	1	duplication	1	duplication	greater than 10kb
W02A2.5	chrIV	13342833	13346165	1	duplication	1	duplication	greater than 10kb
W02A2.9	chrIV	13347662	13348551	1	duplication	1	duplication	greater than 10kb
W02A2.6	chrIV	13349095	13353169	1	duplication	1	duplication	greater than 10kb
W02A2.7	chrIV	13353691	13356087	1	duplication	1	duplication	greater than 10kb
W02A2.8	chrIV	13356167	13358573	1	duplication	1	duplication	greater than 10kb
Y62E10A.3	chrIV	13359480	13360261	1	duplication	1	duplication	greater than 10kb
Y62E10A.4	chrIV	13365144	13368357	1	duplication	1	duplication	greater than 10kb
Y62E10A.5	chrIV	13368434	13369396	1	duplication	1	duplication	greater than 10kb
Y62E10A.1	chrIV	13369399	13370269	1	duplication	1	duplication	greater than 10kb
Y62E10A.2	chrIV	13370628	13371589	1	duplication	1	duplication	greater than 10kb
Y62E10A.6	chrIV	13371971	13377345	1	duplication	1	duplication	greater than 10kb
Y62E10A.8	chrIV	13377989	13380453	1	duplication	1	duplication	greater than 10kb
Y62E10A.10	chrIV	13380362	13381901	1	duplication	1	duplication	greater than 10kb
Y62E10A.20	chrIV	13382030	13386071	1	duplication	1	duplication	greater than 10kb
Y62E10A.9	chrIV	13382036	13384292	1	duplication	1	duplication	greater than 10kb
Y62E10A.11	chrIV	13386269	13387337	1	duplication	1	duplication	greater than 10kb
Y62E10A.12	chrIV	13387178	13389575	1	duplication	1	duplication	greater than 10kb
Y62E10A.13	chrIV	13389132	13398775	1	duplication	1	duplication	greater than 10kb
Y62E10A.14	chrIV	13399042	13400489	1	duplication	1	duplication	greater than 10kb
Y62E10A.19	chrIV	13403746	13408247	1	duplication	1	duplication	greater than 10kb
Y62E10A.16	chrIV	13408988	13412873	1	duplication	1	duplication	greater than 10kb
Y62E10A.17	chrIV	13413540	13414847	1	duplication	1	duplication	greater than 10kb
K09B11.1	chrIV	13416767	13421501	1	duplication	1	duplication	greater than 10kb
K09B11.2	chrIV	13422473	13429350	1	duplication	1	duplication	greater than 10kb
K09B11.4	chrIV	13429515	13429944	1	duplication	1	duplication	greater than 10kb
K09B11.5	chrIV	13431217	13434044	1	duplication	1	duplication	greater than 10kb
K09B11.10	chrIV	13434217	13445285	0.728858	duplication	0.728858	duplication	greater than 10kb
K09B11.9	chrIV	13446007	13454774	1	duplication	1	duplication	greater than 10kb
Y38H8A.7	chrIV	13455292	13456125	1	duplication	1	duplication	greater than 10kb
Y38H8A.5	chrIV	13466114	13469378	1	duplication	1	duplication	greater than 10kb
Y38H8A.4	chrIV	13470537	13472239	1	duplication	1	duplication	greater than 10kb
Y38H8A.3	chrIV	13472481	13473955	1	duplication	1	duplication	greater than 10kb
Y38H8A.2	chrIV	13474407	13476193	1	duplication	1	duplication	greater than 10kb
Y45F10A.6	chrIV	13476910	13502828	1	duplication	1	duplication	greater than 10kb
Y38H8A.1	chrIV	13483521	13485486	1	duplication	1	duplication	greater than 10kb
Y45F10A.7	chrIV	13492546	13497117	1	duplication	1	duplication	greater than 10kb
Y45F10A.5	chrIV	13505242	13505734	1	duplication	1	duplication	greater than 10kb
Y45F10A.4	chrIV	13506054	13509191	1	duplication	1	duplication	greater than 10kb
Y45F10A.3	chrIV	13509183	13513533	1	duplication	1	duplication	greater than 10kb
Y45F10A.2	chrIV	13510281	13512144	1	duplication	1	duplication	greater than 10kb
F52G2.1	chrIV	13513344	13521848	1	duplication	1	duplication	greater than 10kb
F52G2.2	chrIV	13521944	13540241	1	duplication	1	duplication	greater than 10kb
F52G2.3	chrIV	13543374	13548208	1	duplication	1	duplication	greater than 10kb
Y45F10B.13	chrIV	13549566	13561628	1	duplication	1	duplication	greater than 10kb
Y45F10B.10	chrIV	13561848	13574395	1	duplication	1	duplication	greater than 10kb
Y45F10B.14	chrIV	13575033	13576716	1	duplication	1	duplication	greater than 10kb
Y45F10B.8	chrIV	13577308	13578250	1	duplication	1	duplication	greater than 10kb
Y45F10B.4	chrIV	13579228	13582088	1	duplication	1	duplication	greater than 10kb
Y45F10B.6	chrIV	13584921	13587264	1	duplication	1	duplication	greater than 10kb
Y45F10B.11	chrIV	13588968	13590313	1	duplication	1	duplication	greater than 10kb
Y45F10B.1	chrIV	13590582	13591721	1	duplication	1	duplication	greater than 10kb
Y45F10B.3	chrIV	13593626	13593854	1	duplication	1	duplication	greater than 10kb
Y45F10B.9	chrIV	13596947	13597889	1	duplication	1	duplication	greater than 10kb
Y45F10B.59	chrIV	13602649	13603240	1	duplication	1	duplication	greater than 10kb
Y45F10B.15	chrIV	13603524	13604171	1	duplication	1	duplication	greater than 10kb
C08F11.13	chrIV	13607415	13609859	1	duplication	1	duplication	greater than 10kb
C08F11.3	chrIV	13619483	13621489	1	duplication	1	duplication	greater than 10kb
C08F11.2	chrIV	13621806	13623110	1	duplication	1	duplication	greater than 10kb
C08F11.1	chrIV	13623810	13625518	1	duplication	1	duplication	greater than 10kb
C08F11.4	chrIV	13626744	13632673	1	duplication	1	duplication	greater than 10kb
C08F11.5	chrIV	13633414	13635196	1	duplication	1	duplication	greater than 10kb
C08F11.7	chrIV	13637263	13638501	1	duplication	1	duplication	greater than 10kb
C08F11.8	chrIV	13639241	13644377	1	duplication	1	duplication	greater than 10kb
C08F11.11	chrIV	13646706	13647634	1	duplication	1	duplication	greater than 10kb
C08F11.10	chrIV	13648012	13649186	1	duplication	1	duplication	greater than 10kb
C08F11.12	chrIV	13650635	13651487	1	duplication	1	duplication	greater than 10kb
Y45F10C.6	chrIV	13653930	13655827	1	duplication	1	duplication	greater than 10kb
Y45F10C.1	chrIV	13656388	13659523	1	duplication	1	duplication	greater than 10kb
Y45F10C.4	chrIV	13663374	13664167	1	duplication	1	duplication	greater than 10kb
Y45F10C.3	chrIV	13665319	13666887	1	duplication	1	duplication	greater than 10kb
T23G4.4	chrIV	13673779	13677799	1	duplication	1	duplication	greater than 10kb
T23G4.5	chrIV	13678926	13680309	1	duplication	1	duplication	greater than 10kb
T23G4.3	chrIV	13685048	13686988	1	duplication	1	duplication	greater than 10kb
T23G4.2	chrIV	13688299	13688771	1	duplication	1	duplication	greater than 10kb
T23G4.1	chrIV	13701187	13704003	1	duplication	1	duplication	greater than 10kb
C47A4.1	chrIV	13715881	13716645	1	duplication	1	duplication	greater than 10kb
C47A4.2	chrIV	13726905	13732699	1	duplication	1	duplication	greater than 10kb
C47A4.3	chrIV	13741017	13742241	1	duplication	1	duplication	greater than 10kb
Y45F10D.13	chrIV	13750311	13770583	1	duplication	1	duplication	greater than 10kb
Y45F10D.2	chrIV	13773523	13774654	1	duplication	1	duplication	greater than 10kb
Y45F10D.16	chrIV	13776390	13777125	1	duplication	1	duplication	greater than 10kb
Y45F10D.12	chrIV	13777783	13779062	1	duplication	1	duplication	greater than 10kb
Y45F10D.3	chrIV	13778841	13782362	1	duplication	1	duplication	greater than 10kb
Y45F10D.11	chrIV	13782364	13785623	1	duplication	1	duplication	greater than 10kb
Y45F10D.4	chrIV	13783934	13784655	1	duplication	1	duplication	greater than 10kb
Y45F10D.10	chrIV	13785715	13786853	1	duplication	1	duplication	greater than 10kb
Y45F10D.9	chrIV	13786918	13788698	1	duplication	1	duplication	greater than 10kb
Y45F10D.7	chrIV	13788910	13796199	1	duplication	1	duplication	greater than 10kb
Y45F10D.6	chrIV	13796229	13797879	1	duplication	1	duplication	greater than 10kb
Y45F10D.14	chrIV	13804036	13807747	1	duplication	1	duplication	greater than 10kb
Y45F10D.15	chrIV	13817461	13820937	1	duplication	1	duplication	greater than 10kb
H08M01.2	chrIV	13827860	13844953	1	duplication	1	duplication	greater than 10kb
H08M01.1	chrIV	13834284	13836365	1	duplication	1	duplication	greater than 10kb
B0513.6	chrIV	13854329	13857326	1	duplication	1	duplication	greater than 10kb
B0513.9	chrIV	13860118	13865269	1	duplication	1	duplication	greater than 10kb
B0513.5	chrIV	13868528	13876592	1	duplication	1	duplication	greater than 10kb
B0513.4	chrIV	13880112	13881517	1	duplication	1	duplication	greater than 10kb
B0513.3	chrIV	13882168	13882638	1	duplication	1	duplication	greater than 10kb
B0513.2	chrIV	13882706	13884152	1	duplication	1	duplication	greater than 10kb
B0513.1	chrIV	13888063	13893956	1	duplication	1	duplication	greater than 10kb
Y37A1A.3	chrIV	13897827	13902847	1	duplication	1	duplication	greater than 10kb
Y37A1A.2	chrIV	13905964	13912272	1	duplication	1	duplication	greater than 10kb
Y37A1A.4	chrIV	13934419	13943703	1	duplication	1	duplication	greater than 10kb
C27H2.2	chrIV	13940913	13963978	1	duplication	1	duplication	greater than 10kb
Y37A1B.17	chrIV	13964335	13979822	1	duplication	1	duplication	greater than 10kb
Y37A1B.15	chrIV	13981061	13982498	1	duplication	1	duplication	greater than 10kb
Y37A1B.13	chrIV	13982658	13984141	1	duplication	1	duplication	greater than 10kb
Y37A1B.12	chrIV	13984488	13985668	1	duplication	1	duplication	greater than 10kb
Y37A1B.11	chrIV	13989068	14012049	1	duplication	1	duplication	greater than 10kb
Y37A1B.10	chrIV	14013998	14015919	1	duplication	1	duplication	greater than 10kb
Y37A1B.9	chrIV	14016073	14019958	1	duplication	1	duplication	greater than 10kb
Y37A1B.8	chrIV	14020172	14024603	1	duplication	1	duplication	greater than 10kb
Y37A1B.7	chrIV	14042567	14043755	1	duplication	1	duplication	greater than 10kb
Y37A1B.5	chrIV	14051174	14056643	1	duplication	1	duplication	greater than 10kb
Y37A1B.4	chrIV	14059525	14060687	1	duplication	1	duplication	greater than 10kb
Y37A1B.2	chrIV	14060979	14069831	1	duplication	1	duplication	greater than 10kb
Y37A1B.1	chrIV	14071349	14076719	1	duplication	1	duplication	greater than 10kb
F52B11.1	chrIV	14077415	14083534	1	duplication	1	duplication	greater than 10kb
F52B11.2	chrIV	14083542	14084635	1	duplication	1	duplication	greater than 10kb
F52B11.3	chrIV	14091228	14096599	1	duplication	1	duplication	greater than 10kb
F52B11.4	chrIV	14098309	14099327	1	duplication	1	duplication	greater than 10kb
F52B11.5	chrIV	14101974	14103128	1	duplication	1	duplication	greater than 10kb
F52B11.6	chrIV	14106558	14107681	1	duplication	1	duplication	greater than 10kb
Y37A1C.1	chrIV	14107705	14116009	0.758068	duplication	0.758068	duplication	greater than 10kb
Y40H7A.4	chrIV	15167767	15175504	0.582009	duplication	0.582009	duplication	greater than 10kb
Y40H7A.5	chrIV	15179889	15182921	1	duplication	1	duplication	greater than 10kb
cTel3X.1	chrV	1479	3039	1	duplication	1	duplication	greater than 10kb
B0348.5	chrV	5689	6511	1	duplication	1	duplication	greater than 10kb
B0348.6	chrV	6588	7822	1	duplication	1	duplication	greater than 10kb
B0348.4	chrV	20824	43971	1	duplication	1	duplication	greater than 10kb
B0348.2	chrV	45462	46923	1	duplication	1	duplication	greater than 10kb
B0348.1	chrV	48921	49619	1	duplication	1	duplication	greater than 10kb
Y38C9B.2	chrV	49955	56046	1	duplication	1	duplication	greater than 10kb
Y38C9B.1	chrV	59241	63509	1	duplication	1	duplication	greater than 10kb
Y38C9B.3	chrV	63725	64503	1	duplication	1	duplication	greater than 10kb
F56E10.2	chrV	64563	83770	1	duplication	1	duplication	greater than 10kb
F56E10.4	chrV	103384	104070	1	duplication	1	duplication	greater than 10kb
F56E10.1	chrV	104829	105964	1	duplication	1	duplication	greater than 10kb
Y38C9A.1	chrV	107401	118162	1	duplication	1	duplication	greater than 10kb
Y38C9A.2	chrV	118042	122966	1	duplication	1	duplication	greater than 10kb
W03F9.1	chrV	124005	126751	1	duplication	1	duplication	greater than 10kb
W03F9.2	chrV	127000	128009	1	duplication	1	duplication	greater than 10kb
W03F9.10	chrV	128234	131739	1	duplication	1	duplication	greater than 10kb
W03F9.3	chrV	132465	132998	1	duplication	1	duplication	greater than 10kb
W03F9.11	chrV	133499	141370	1	duplication	1	duplication	greater than 10kb
W03F9.9	chrV	138891	140225	1	duplication	1	duplication	greater than 10kb
W03F9.6	chrV	145193	146931	1	duplication	1	duplication	greater than 10kb
W03F9.4	chrV	147525	152104	1	duplication	1	duplication	greater than 10kb
W03F9.5	chrV	156824	166895	1	duplication	1	duplication	greater than 10kb
Y108G3AL.3	chrV	163841	172211	1	duplication	1	duplication	greater than 10kb
Y108G3AL.2	chrV	166993	176824	1	duplication	1	duplication	greater than 10kb
Y108G3AL.1	chrV	177421	184873	1	duplication	1	duplication	greater than 10kb
Y108G3AL.7	chrV	185838	200687	1	duplication	1	duplication	greater than 10kb
DC2.8	chrV	201596	204280	1	duplication	1	duplication	greater than 10kb
DC2.3	chrV	204380	209760	1	duplication	1	duplication	greater than 10kb
DC2.5	chrV	210151	212714	1	duplication	1	duplication	greater than 10kb
DC2.2	chrV	217154	219474	1	duplication	1	duplication	greater than 10kb
DC2.1	chrV	219932	222777	1	duplication	1	duplication	greater than 10kb
DC2.6	chrV	223028	226948	1	duplication	1	duplication	greater than 10kb
DC2.7	chrV	227443	234673	1	duplication	1	duplication	greater than 10kb
R02C2.1	chrV	236750	238193	1	duplication	1	duplication	greater than 10kb
R02C2.6	chrV	238963	240363	1	duplication	1	duplication	greater than 10kb
R02C2.7	chrV	241326	242617	1	duplication	1	duplication	greater than 10kb
R02C2.2	chrV	244469	245847	1	duplication	1	duplication	greater than 10kb
R02C2.3	chrV	246607	251747	1	duplication	1	duplication	greater than 10kb
R02C2.5	chrV	252364	254667	1	duplication	1	duplication	greater than 10kb
R02C2.4	chrV	254842	257981	1	duplication	1	duplication	greater than 10kb
Y58G8A.1	chrV	268306	271420	1	duplication	1	duplication	greater than 10kb
Y58G8A.5	chrV	272092	272937	1	duplication	1	duplication	greater than 10kb
Y58G8A.4	chrV	276737	281717	1	duplication	1	duplication	greater than 10kb
F33E11.2	chrV	296598	300009	1	duplication	1	duplication	greater than 10kb
F33E11.3	chrV	300027	304716	1	duplication	1	duplication	greater than 10kb
F33E11.6	chrV	305438	311536	1	duplication	1	duplication	greater than 10kb
F33E11.1	chrV	320357	323645	1	duplication	1	duplication	greater than 10kb
Y39D8C.1	chrV	323777	330728	1	duplication	1	duplication	greater than 10kb
T22H9.4	chrV	334603	336862	1	duplication	1	duplication	greater than 10kb
T22H9.3	chrV	343460	347624	1	duplication	1	duplication	greater than 10kb
T22H9.2	chrV	348789	358842	1	duplication	1	duplication	greater than 10kb
T22H9.1	chrV	359763	363669	1	duplication	1	duplication	greater than 10kb
Y39D8B.2	chrV	364950	369089	1	duplication	1	duplication	greater than 10kb
Y39D8B.1	chrV	370333	373256	1	duplication	1	duplication	greater than 10kb
Y39D8B.3	chrV	374408	379673	1	duplication	1	duplication	greater than 10kb
ZK6.8	chrV	381901	384689	1	duplication	1	duplication	greater than 10kb
ZK6.7	chrV	385737	388112	1	duplication	1	duplication	greater than 10kb
ZK6.6	chrV	388698	391599	1	duplication	1	duplication	greater than 10kb
ZK6.5	chrV	392628	395118	1	duplication	1	duplication	greater than 10kb
ZK6.4	chrV	396827	398757	1	duplication	1	duplication	greater than 10kb
ZK6.3	chrV	400257	401652	1	duplication	1	duplication	greater than 10kb
ZK6.9	chrV	401688	403129	1	duplication	1	duplication	greater than 10kb
ZK6.2	chrV	404619	405998	1	duplication	1	duplication	greater than 10kb
ZK6.1	chrV	408265	410081	1	duplication	1	duplication	greater than 10kb
ZK6.10	chrV	411779	414761	1	duplication	1	duplication	greater than 10kb
ZK6.11	chrV	415713	417707	1	duplication	1	duplication	greater than 10kb
Y39D8A.1	chrV	419687	421842	1	duplication	1	duplication	greater than 10kb
B0554.6	chrV	422498	424167	1	duplication	1	duplication	greater than 10kb
B0554.5	chrV	424440	426561	1	duplication	1	duplication	greater than 10kb
B0554.4	chrV	430612	433575	1	duplication	1	duplication	greater than 10kb
B0554.2	chrV	434768	436727	1	duplication	1	duplication	greater than 10kb
B0554.7	chrV	437576	441024	0.12297	duplication	0.12297	duplication	greater than 10kb
T27B7.5	chrV	2285277	2287519	1	duplication	1	duplication	greater than 10kb
T27B7.2	chrV	2287804	2290532	1	duplication	1	duplication	greater than 10kb
T27B7.4	chrV	2288485	2294797	1	duplication	1	duplication	greater than 10kb
T27B7.3	chrV	2294820	2297007	1	duplication	1	duplication	greater than 10kb
Y19D10B.2	chrV	2299994	2303173	1	duplication	1	duplication	greater than 10kb
Y19D10B.3	chrV	2303469	2303867	1	duplication	1	duplication	greater than 10kb
Y19D10B.4	chrV	2304355	2309158	1	duplication	1	duplication	greater than 10kb
Y19D10B.1	chrV	2312301	2313808	1	duplication	1	duplication	greater than 10kb
Y19D10B.5	chrV	2314001	2318429	1	duplication	1	duplication	greater than 10kb
Y19D10B.6	chrV	2318523	2321051	1	duplication	1	duplication	greater than 10kb
Y19D10B.7	chrV	2322036	2322565	1	duplication	1	duplication	greater than 10kb
F15E11.15	chrV	2324508	2326846	1	duplication	1	duplication	greater than 10kb
F15E11.12	chrV	2326677	2327261	1	duplication	1	duplication	greater than 10kb
F15E11.1	chrV	2329442	2329953	1	duplication	1	duplication	greater than 10kb
F15E11.2	chrV	2334911	2336250	0.813294	duplication	0.813294	duplication	greater than 10kb
ZC412.6	chrV	14878308	14878487	1	duplication	1	duplication	greater than 10kb
Y43F8C.4	chrV	19625031	19630723	0.478215	duplication	0.478215	duplication	greater than 10kb
Y43F8C.5	chrV	19631338	19632628	1	duplication	1	duplication	greater than 10kb
Y43F8C.6	chrV	19633031	19640878	0.760673	duplication	0.760673	duplication	greater than 10kb
T06F4.1	chrX	4056793	4071469	0.0141047	duplication	0.0141047	duplication	greater than 10kb
C04B4.1	chrX	12280638	12282491	1	duplication	1	duplication	greater than 10kb
C04B4.2	chrX	12283232	12285246	1	duplication	1	duplication	greater than 10kb
C04B4.5	chrX	12287590	12288286	1	duplication	1	duplication	greater than 10kb
C04B4.4	chrX	12289910	12293199	1	duplication	1	duplication	greater than 10kb
W06D11.1	chrX	12293698	12295479	1	duplication	1	duplication	greater than 10kb
W06D11.2	chrX	12296021	12296577	1	duplication	1	duplication	greater than 10kb
W06D11.3	chrX	12298622	12299989	1	duplication	1	duplication	greater than 10kb
W06D11.5	chrX	12300065	12301214	1	duplication	1	duplication	greater than 10kb
W06D11.4	chrX	12301521	12303225	1	duplication	1	duplication	greater than 10kb
F17A2.3	chrX	12306926	12309414	1	duplication	1	duplication	greater than 10kb
F17A2.4	chrX	12310743	12312662	1	duplication	1	duplication	greater than 10kb
F17A2.1	chrX	12315471	12317605	1	duplication	1	duplication	greater than 10kb
F17A2.5	chrX	12318090	12320632	1	duplication	1	duplication	greater than 10kb
F17A2.13	chrX	12321597	12322925	1	duplication	1	duplication	greater than 10kb
F17A2.12	chrX	12323670	12325364	1	duplication	1	duplication	greater than 10kb
F17A2.6	chrX	12326655	12328297	1	duplication	1	duplication	greater than 10kb
F17A2.7	chrX	12328907	12330458	1	duplication	1	duplication	greater than 10kb
F17A2.10	chrX	12332026	12333234	1	duplication	1	duplication	greater than 10kb
F17A2.11	chrX	12333573	12335222	1	duplication	1	duplication	greater than 10kb
F17A2.9	chrX	12336039	12337684	1	duplication	1	duplication	greater than 10kb
F42F12.2	chrX	12340310	12341362	1	duplication	1	duplication	greater than 10kb
F42F12.9	chrX	12343545	12343975	1	duplication	1	duplication	greater than 10kb
F42F12.11	chrX	12346960	12347831	1	duplication	1	duplication	greater than 10kb
F42F12.14	chrX	12348496	12350265	1	duplication	1	duplication	greater than 10kb
F42F12.3	chrX	12350519	12351678	1	duplication	1	duplication	greater than 10kb
F42F12.4	chrX	12351909	12352909	1	duplication	1	duplication	greater than 10kb
F42F12.10	chrX	12356125	12356613	1	duplication	1	duplication	greater than 10kb
F42F12.7	chrX	12358542	12359029	1	duplication	1	duplication	greater than 10kb
F19H6.6	chrX	12362328	12363042	1	duplication	1	duplication	greater than 10kb
F19H6.5	chrX	12363644	12364836	1	duplication	1	duplication	greater than 10kb
F19H6.4	chrX	12365619	12367195	1	duplication	1	duplication	greater than 10kb
F19H6.3	chrX	12368383	12371353	1	duplication	1	duplication	greater than 10kb
F19H6.2	chrX	12374160	12375852	1	duplication	1	duplication	greater than 10kb
F19H6.7	chrX	12377765	12378282	1	duplication	1	duplication	greater than 10kb
F19H6.1	chrX	12389525	12391406	1	duplication	1	duplication	greater than 10kb
F17E5.2	chrX	12394196	12399422	1	duplication	1	duplication	greater than 10kb
F17E5.1	chrX	12399449	12413957	1	duplication	1	duplication	greater than 10kb
T24D3.2	chrX	12425733	12426741	1	duplication	1	duplication	greater than 10kb
T24D3.1	chrX	12430541	12431201	1	duplication	1	duplication	greater than 10kb
T18D3.8	chrX	12437415	12438227	1	duplication	1	duplication	greater than 10kb
T18D3.7	chrX	12440692	12443847	1	duplication	1	duplication	greater than 10kb
T18D3.6	chrX	12449848	12451223	1	duplication	1	duplication	greater than 10kb
T18D3.9	chrX	12451006	12454248	1	duplication	1	duplication	greater than 10kb
T18D3.1	chrX	12454676	12457903	1	duplication	1	duplication	greater than 10kb
T18D3.2	chrX	12459000	12461571	1	duplication	1	duplication	greater than 10kb
T18D3.5	chrX	12463749	12464310	1	duplication	1	duplication	greater than 10kb
T18D3.3	chrX	12464579	12466810	1	duplication	1	duplication	greater than 10kb
T18D3.4	chrX	12467231	12475273	1	duplication	1	duplication	greater than 10kb
F45E6.1	chrX	12475590	12477373	1	duplication	1	duplication	greater than 10kb
F45E6.2	chrX	12480879	12484829	1	duplication	1	duplication	greater than 10kb
F45E6.3	chrX	12484985	12491089	1	duplication	1	duplication	greater than 10kb
F45E6.4	chrX	12492795	12495793	1	duplication	1	duplication	greater than 10kb
F45E6.6	chrX	12502516	12503269	1	duplication	1	duplication	greater than 10kb
H20J18.1	chrX	12503817	12513979	1	duplication	1	duplication	greater than 10kb
C16D6.1	chrX	12525274	12525714	1	duplication	1	duplication	greater than 10kb
C16D6.3	chrX	12526590	12527217	1	duplication	1	duplication	greater than 10kb
C16D6.2	chrX	12536944	12551608	1	duplication	1	duplication	greater than 10kb
T24D5.1	chrX	12573999	12577140	1	duplication	1	duplication	greater than 10kb
T24D5.3	chrX	12580004	12583144	1	duplication	1	duplication	greater than 10kb
T24D5.2	chrX	12583729	12586370	1	duplication	1	duplication	greater than 10kb
T24D5.5	chrX	12597961	12599228	1	duplication	1	duplication	greater than 10kb
T24D5.6	chrX	12602959	12603992	1	duplication	1	duplication	greater than 10kb
R09A8.1	chrX	12612658	12618253	1	duplication	1	duplication	greater than 10kb
R09A8.2	chrX	12619403	12623584	1	duplication	1	duplication	greater than 10kb
R09A8.3	chrX	12624587	12634286	1	duplication	1	duplication	greater than 10kb
R09A8.4	chrX	12636084	12636988	1	duplication	1	duplication	greater than 10kb
R09A8.5	chrX	12638390	12640491	1	duplication	1	duplication	greater than 10kb
H36L18.1	chrX	12647046	12651417	1	duplication	1	duplication	greater than 10kb
H36L18.2	chrX	12652516	12653452	1	duplication	1	duplication	greater than 10kb
C02B4.4	chrX	12662402	12663553	1	duplication	1	duplication	greater than 10kb
C02B4.2	chrX	12663723	12667782	1	duplication	1	duplication	greater than 10kb
C02B4.1	chrX	12678759	12689207	1	duplication	1	duplication	greater than 10kb
T07C5.1	chrX	12691537	12695585	1	duplication	1	duplication	greater than 10kb
T07C5.5	chrX	12695516	12697928	1	duplication	1	duplication	greater than 10kb
T07C5.4	chrX	12698875	12699980	1	duplication	1	duplication	greater than 10kb
T07C5.3	chrX	12700448	12701968	1	duplication	1	duplication	greater than 10kb
T07C5.2	chrX	12703258	12704750	1	duplication	1	duplication	greater than 10kb
F16H9.2	chrX	12705552	12808248	1	duplication	1	duplication	greater than 10kb
F16H9.1	chrX	12712579	12728319	1	duplication	1	duplication	greater than 10kb
F22E10.1	chrX	12731779	12737362	1	duplication	1	duplication	greater than 10kb
F22E10.2	chrX	12738925	12744305	1	duplication	1	duplication	greater than 10kb
F22E10.3	chrX	12744651	12749510	1	duplication	1	duplication	greater than 10kb
F22E10.5	chrX	12762014	12765852	1	duplication	1	duplication	greater than 10kb
T22H6.1	chrX	12767392	12769727	1	duplication	1	duplication	greater than 10kb
T22H6.2	chrX	12782325	12787084	1	duplication	1	duplication	greater than 10kb
T22H6.3	chrX	12787590	12789186	1	duplication	1	duplication	greater than 10kb
T22H6.4	chrX	12790265	12791681	1	duplication	1	duplication	greater than 10kb
T22H6.5	chrX	12792778	12793316	1	duplication	1	duplication	greater than 10kb
T22H6.7	chrX	12794106	12794803	1	duplication	1	duplication	greater than 10kb
T22H6.6	chrX	12795133	12813877	1	duplication	1	duplication	greater than 10kb
C52G5.2	chrX	12843243	12845314	1	duplication	1	duplication	greater than 10kb
C52G5.3	chrX	12845740	12846073	1	duplication	1	duplication	greater than 10kb
T14G8.1	chrX	12846359	12852531	1	duplication	1	duplication	greater than 10kb
T14G8.2	chrX	12857948	12859471	1	duplication	1	duplication	greater than 10kb
T14G8.3	chrX	12861166	12869958	1	duplication	1	duplication	greater than 10kb
T14G8.4	chrX	12862083	12863828	1	duplication	1	duplication	greater than 10kb
K02A4.1	chrX	12877409	12880261	1	duplication	1	duplication	greater than 10kb
K02A4.2	chrX	12881157	12884919	1	duplication	1	duplication	greater than 10kb
C34E7.1	chrX	12907761	12920061	1	duplication	1	duplication	greater than 10kb
C34E7.3	chrX	12930265	12931955	1	duplication	1	duplication	greater than 10kb
C34E7.4	chrX	12932086	12934907	1	duplication	1	duplication	greater than 10kb
C05E7.2	chrX	12938626	12940641	1	duplication	1	duplication	greater than 10kb
C05E7.1	chrX	12941370	12943477	1	duplication	1	duplication	greater than 10kb
C05E7.3	chrX	12945545	12946492	1	duplication	1	duplication	greater than 10kb
C05E7.4	chrX	12965414	12968386	1	duplication	1	duplication	greater than 10kb
VF11C1L.1	chrX	12968477	12975573	1	duplication	1	duplication	greater than 10kb
F11C1.10	chrX	12977021	12977782	1	duplication	1	duplication	greater than 10kb
F11C1.9	chrX	12977173	12977481	1	duplication	1	duplication	greater than 10kb
F11C1.4	chrX	12978434	12979702	1	duplication	1	duplication	greater than 10kb
F11C1.3	chrX	12981744	12985799	1	duplication	1	duplication	greater than 10kb
F11C1.2	chrX	12985719	12987149	1	duplication	1	duplication	greater than 10kb
F11C1.1	chrX	12987264	12989243	1	duplication	1	duplication	greater than 10kb
F11C1.7	chrX	12989423	12990284	1	duplication	1	duplication	greater than 10kb
F11C1.5	chrX	12991376	12999569	1	duplication	1	duplication	greater than 10kb
F11C1.6	chrX	13008423	13013893	1	duplication	1	duplication	greater than 10kb
C53C7.1	chrX	13018778	13021954	1	duplication	1	duplication	greater than 10kb
C53C7.3	chrX	13048488	13050816	1	duplication	1	duplication	greater than 10kb
K03A11.1	chrX	13051726	13055339	1	duplication	1	duplication	greater than 10kb
K03A11.6	chrX	13055790	13058104	1	duplication	1	duplication	greater than 10kb
K03A11.5	chrX	13064212	13066873	1	duplication	1	duplication	greater than 10kb
K03A11.2	chrX	13067425	13068170	1	duplication	1	duplication	greater than 10kb
K03A11.3	chrX	13074612	13076023	1	duplication	1	duplication	greater than 10kb
K03A11.4	chrX	13078102	13081976	1	duplication	1	duplication	greater than 10kb
R03G8.1	chrX	13084503	13087577	1	duplication	1	duplication	greater than 10kb
R03G8.3	chrX	13091061	13094355	1	duplication	1	duplication	greater than 10kb
R03G8.6	chrX	13094488	13100376	1	duplication	1	duplication	greater than 10kb
R03G8.4	chrX	13101236	13104136	1	duplication	1	duplication	greater than 10kb
F17H10.1	chrX	13105122	13108474	1	duplication	1	duplication	greater than 10kb
F17H10.2	chrX	13113866	13116278	1	duplication	1	duplication	greater than 10kb
F17H10.3	chrX	13116285	13122221	1	duplication	1	duplication	greater than 10kb
F17H10.4	chrX	13125905	13126450	1	duplication	1	duplication	greater than 10kb
F09A5.1	chrX	13130192	13134138	1	duplication	1	duplication	greater than 10kb
F09A5.2	chrX	13135036	13139701	1	duplication	1	duplication	greater than 10kb
F09A5.9	chrX	13139790	13140816	1	duplication	1	duplication	greater than 10kb
F09A5.3	chrX	13141530	13152404	1	duplication	1	duplication	greater than 10kb
F09A5.4	chrX	13152751	13170006	1	duplication	1	duplication	greater than 10kb
F48C11.3	chrX	13177784	13178385	1	duplication	1	duplication	greater than 10kb
F48C11.2	chrX	13182393	13189892	1	duplication	1	duplication	greater than 10kb
F48C11.1	chrX	13191176	13193886	1	duplication	1	duplication	greater than 10kb
R12H7.1	chrX	13212320	13216665	0.846951	duplication	0.846951	duplication	greater than 10kb
Y74C9A.3	chrI	4118	10232	0	unaffected	0	unaffected	unaffected
Y74C9A.2	chrI	10412	16842	0	unaffected	0	unaffected	unaffected
Y74C9A.4	chrI	17482	26781	0	unaffected	0	unaffected	unaffected
Y74C9A.5	chrI	27594	32482	0	unaffected	0	unaffected	unaffected
Y74C9A.1	chrI	43732	44677	0	unaffected	0	unaffected	unaffected
Y48G1C.12	chrI	47471	49819	0	unaffected	0	unaffected	unaffected
Y48G1C.4	chrI	49918	54426	0	unaffected	0	unaffected	unaffected
Y48G1C.5	chrI	55315	64021	0	unaffected	0	unaffected	unaffected
Y48G1C.2	chrI	71857	81071	0	unaffected	0	unaffected	unaffected
Y48G1C.10	chrI	81200	84959	0	unaffected	0	unaffected	unaffected
Y48G1C.11	chrI	82118	91020	0	unaffected	0	unaffected	unaffected
Y48G1C.6	chrI	84989	86284	0	unaffected	0	unaffected	unaffected
Y48G1C.9	chrI	91379	92877	0	unaffected	0	unaffected	unaffected
Y48G1C.1	chrI	93030	94881	0	unaffected	0	unaffected	unaffected
Y48G1C.13	chrI	94957	95367	0	unaffected	0	unaffected	unaffected
Y48G1C.7	chrI	96478	101733	0	unaffected	0	unaffected	unaffected
Y48G1C.8	chrI	101212	108161	0	unaffected	0	unaffected	unaffected
F53G12.1	chrI	108671	110077	0	unaffected	0	unaffected	unaffected
F53G12.10	chrI	111035	112417	0	unaffected	0	unaffected	unaffected
F53G12.9	chrI	112364	112915	0	unaffected	0	unaffected	unaffected
F53G12.13	chrI	112382	113672	0	unaffected	0	unaffected	unaffected
F53G12.8	chrI	113806	114711	0	unaffected	0	unaffected	unaffected
F53G12.7	chrI	115738	117502	0	unaffected	0	unaffected	unaffected
F53G12.6	chrI	118103	120870	0	unaffected	0	unaffected	unaffected
F53G12.5	chrI	127296	134271	0	unaffected	0	unaffected	unaffected
F53G12.4	chrI	134336	137332	0	unaffected	0	unaffected	unaffected
F53G12.3	chrI	137844	144565	0	unaffected	0	unaffected	unaffected
F53G12.11	chrI	145235	145627	0	unaffected	0	unaffected	unaffected
F56C11.1	chrI	145967	154850	0	unaffected	0	unaffected	unaffected
F56C11.2	chrI	160171	166819	0	unaffected	0	unaffected	unaffected
F56C11.6	chrI	173411	175991	0	unaffected	0	unaffected	unaffected
F56C11.5	chrI	178537	182159	0	unaffected	0	unaffected	unaffected
F56C11.3	chrI	182078	182771	0	unaffected	0	unaffected	unaffected
F56C11.4	chrI	183363	184221	0	unaffected	0	unaffected	unaffected
K10E9.1	chrI	189057	202489	0	unaffected	0	unaffected	unaffected
Y48G1BL.2	chrI	203036	208467	0	unaffected	0	unaffected	unaffected
Y48G1BL.7	chrI	209319	211733	0	unaffected	0	unaffected	unaffected
Y48G1BL.1	chrI	216004	219099	0	unaffected	0	unaffected	unaffected
Y48G1BL.4	chrI	217147	217431	0	unaffected	0	unaffected	unaffected
Y48G1BL.5	chrI	219734	220560	0	unaffected	0	unaffected	unaffected
Y48G1BL.6	chrI	221063	221575	0	unaffected	0	unaffected	unaffected
Y48G1BM.6	chrI	231573	238252	0	unaffected	0	unaffected	unaffected
Y48G1BM.7	chrI	238615	239021	0	unaffected	0	unaffected	unaffected
Y48G1BM.8	chrI	248623	251580	0	unaffected	0	unaffected	unaffected
Y48G1BM.1	chrI	252117	254129	0	unaffected	0	unaffected	unaffected
Y48G1BM.9	chrI	254708	258692	0	unaffected	0	unaffected	unaffected
Y48G1BR.1	chrI	257413	259157	0	unaffected	0	unaffected	unaffected
C53D5.3	chrI	280119	280445	0	unaffected	0	unaffected	unaffected
C53D5.2	chrI	283499	286153	0	unaffected	0	unaffected	unaffected
C53D5.4	chrI	286088	289139	0	unaffected	0	unaffected	unaffected
C53D5.1	chrI	291215	305473	0	unaffected	0	unaffected	unaffected
C53D5.5	chrI	305810	310888	0	unaffected	0	unaffected	unaffected
C53D5.6	chrI	310980	314992	0	unaffected	0	unaffected	unaffected
Y48G1A.5	chrI	318542	323353	0	unaffected	0	unaffected	unaffected
Y48G1A.4	chrI	323860	330991	0	unaffected	0	unaffected	unaffected
Y48G1A.3	chrI	332609	337845	0	unaffected	0	unaffected	unaffected
Y48G1A.6	chrI	343117	348367	0	unaffected	0	unaffected	unaffected
Y48G1A.2	chrI	347464	348361	0	unaffected	0	unaffected	unaffected
Y48G1A.1	chrI	348537	357235	0	unaffected	0	unaffected	unaffected
R119.1	chrI	357238	363904	0	unaffected	0	unaffected	unaffected
R119.7	chrI	364521	368511	0	unaffected	0	unaffected	unaffected
R119.2	chrI	368372	373411	0	unaffected	0	unaffected	unaffected
R119.3	chrI	373349	379078	0	unaffected	0	unaffected	unaffected
R119.4	chrI	377477	381907	0	unaffected	0	unaffected	unaffected
R119.6	chrI	382835	388850	0	unaffected	0	unaffected	unaffected
R119.5	chrI	388509	394418	0	unaffected	0	unaffected	unaffected
Y50C1A.1	chrI	398893	412513	0	unaffected	0	unaffected	unaffected
Y50C1A.2	chrI	412913	418663	0	unaffected	0	unaffected	unaffected
C07F11.2	chrI	420924	423721	0	unaffected	0	unaffected	unaffected
C07F11.1	chrI	444001	461610	0	unaffected	0	unaffected	unaffected
W04C9.4	chrI	461995	462655	0	unaffected	0	unaffected	unaffected
W04C9.5	chrI	462644	467134	0	unaffected	0	unaffected	unaffected
W04C9.3	chrI	477584	481957	0	unaffected	0	unaffected	unaffected
W04C9.6	chrI	482481	487993	0	unaffected	0	unaffected	unaffected
W04C9.2	chrI	488607	490248	0	unaffected	0	unaffected	unaffected
W04C9.1	chrI	489986	496157	0	unaffected	0	unaffected	unaffected
Y65B4BL.3	chrI	496207	502046	0	unaffected	0	unaffected	unaffected
Y65B4BL.4	chrI	502957	506253	0	unaffected	0	unaffected	unaffected
Y65B4BL.2	chrI	506479	509059	0	unaffected	0	unaffected	unaffected
Y65B4BL.7	chrI	508852	510840	0	unaffected	0	unaffected	unaffected
Y65B4BL.5	chrI	511017	516459	0	unaffected	0	unaffected	unaffected
Y65B4BL.6	chrI	520115	521557	0	unaffected	0	unaffected	unaffected
Y65B4BL.1	chrI	530568	532855	0	unaffected	0	unaffected	unaffected
Y65B4BR.8	chrI	534455	535350	0	unaffected	0	unaffected	unaffected
Y65B4BR.5	chrI	535791	536673	0	unaffected	0	unaffected	unaffected
Y65B4BR.4	chrI	537124	542200	0	unaffected	0	unaffected	unaffected
Y65B4BR.3	chrI	550710	556685	0	unaffected	0	unaffected	unaffected
Y65B4BR.2	chrI	557433	561674	0	unaffected	0	unaffected	unaffected
Y65B4BR.1	chrI	562738	565184	0	unaffected	0	unaffected	unaffected
Y65B4BR.9	chrI	565438	566394	0	unaffected	0	unaffected	unaffected
Y65B4BR.6	chrI	572179	575122	0	unaffected	0	unaffected	unaffected
F56A6.5	chrI	582290	583751	0	unaffected	0	unaffected	unaffected
F56A6.2	chrI	585822	607574	0	unaffected	0	unaffected	unaffected
F56A6.4	chrI	614655	629447	0	unaffected	0	unaffected	unaffected
F56A6.1	chrI	618209	621466	0	unaffected	0	unaffected	unaffected
Y65B4A.4	chrI	621710	622190	0	unaffected	0	unaffected	unaffected
Y65B4A.6	chrI	631057	636353	0	unaffected	0	unaffected	unaffected
Y65B4A.3	chrI	636849	637855	0	unaffected	0	unaffected	unaffected
Y65B4A.2	chrI	638131	653988	0	unaffected	0	unaffected	unaffected
Y65B4A.7	chrI	645628	647245	0	unaffected	0	unaffected	unaffected
Y65B4A.1	chrI	654098	658709	0	unaffected	0	unaffected	unaffected
Y65B4A.8	chrI	659092	663597	0	unaffected	0	unaffected	unaffected
Y65B4A.9	chrI	663626	666897	0	unaffected	0	unaffected	unaffected
Y18H1A.14	chrI	667617	674416	0	unaffected	0	unaffected	unaffected
Y18H1A.11	chrI	680416	683531	0	unaffected	0	unaffected	unaffected
Y18H1A.10	chrI	683726	686578	0	unaffected	0	unaffected	unaffected
Y18H1A.1	chrI	688281	691270	0	unaffected	0	unaffected	unaffected
Y18H1A.4	chrI	692030	694951	0	unaffected	0	unaffected	unaffected
Y18H1A.2	chrI	694978	698330	0	unaffected	0	unaffected	unaffected
Y18H1A.3	chrI	700276	715853	0	unaffected	0	unaffected	unaffected
Y18H1A.7	chrI	717941	719730	0	unaffected	0	unaffected	unaffected
Y18H1A.6	chrI	720013	731085	0	unaffected	0	unaffected	unaffected
Y18H1A.15	chrI	731982	736555	0	unaffected	0	unaffected	unaffected
Y18H1A.13	chrI	741881	745457	0	unaffected	0	unaffected	unaffected
Y18H1A.12	chrI	745755	748510	0	unaffected	0	unaffected	unaffected
Y18H1A.9	chrI	748230	757013	0	unaffected	0	unaffected	unaffected
Y18H1A.8	chrI	758758	760544	0	unaffected	0	unaffected	unaffected
T06A4.2	chrI	760848	761845	0	unaffected	0	unaffected	unaffected
T06A4.3	chrI	763627	770723	0	unaffected	0	unaffected	unaffected
T06A4.1	chrI	770894	776371	0	unaffected	0	unaffected	unaffected
ZC123.3	chrI	803370	835296	0	unaffected	0	unaffected	unaffected
ZC123.1	chrI	837998	841750	0	unaffected	0	unaffected	unaffected
ZC123.4	chrI	841748	846766	0	unaffected	0	unaffected	unaffected
Y95B8A.7	chrI	853562	871950	0	unaffected	0	unaffected	unaffected
Y95B8A.10	chrI	873483	882716	0	unaffected	0	unaffected	unaffected
Y95B8A.6	chrI	882920	890210	0	unaffected	0	unaffected	unaffected
Y95B8A.11	chrI	889934	895102	0	unaffected	0	unaffected	unaffected
Y95B8A.5	chrI	897286	906007	0	unaffected	0	unaffected	unaffected
Y95B8A.4	chrI	907467	911198	0	unaffected	0	unaffected	unaffected
Y95B8A.12	chrI	912417	926880	0	unaffected	0	unaffected	unaffected
Y95B8A.2	chrI	938485	941779	0	unaffected	0	unaffected	unaffected
Y95B8A.1	chrI	942414	947679	0	unaffected	0	unaffected	unaffected
Y34D9B.1	chrI	948568	957376	0	unaffected	0	unaffected	unaffected
F54A5.2	chrI	963702	969429	0	unaffected	0	unaffected	unaffected
F54A5.3	chrI	969105	973140	0	unaffected	0	unaffected	unaffected
F54A5.1	chrI	989673	992181	0	unaffected	0	unaffected	unaffected
C54G6.3	chrI	996047	997111	0	unaffected	0	unaffected	unaffected
C54G6.2	chrI	1003891	1010768	0	unaffected	0	unaffected	unaffected
C54G6.1	chrI	1011388	1014384	0	unaffected	0	unaffected	unaffected
C54G6.5	chrI	1016405	1017183	0	unaffected	0	unaffected	unaffected
Y34D9A.11	chrI	1018837	1019222	0	unaffected	0	unaffected	unaffected
Y34D9A.4	chrI	1030631	1033441	0	unaffected	0	unaffected	unaffected
Y34D9A.3	chrI	1034474	1040871	0	unaffected	0	unaffected	unaffected
Y34D9A.7	chrI	1041486	1048562	0	unaffected	0	unaffected	unaffected
Y34D9A.6	chrI	1049596	1050729	0	unaffected	0	unaffected	unaffected
Y34D9A.10	chrI	1053923	1066904	0	unaffected	0	unaffected	unaffected
Y34D9A.2	chrI	1062295	1065272	0	unaffected	0	unaffected	unaffected
R06A10.2	chrI	1068593	1075013	0	unaffected	0	unaffected	unaffected
R06A10.3	chrI	1078426	1079237	0	unaffected	0	unaffected	unaffected
R06A10.1	chrI	1084581	1089745	0	unaffected	0	unaffected	unaffected
R06A10.4	chrI	1089668	1095799	0	unaffected	0	unaffected	unaffected
ZK993.2	chrI	1107580	1115570	0	unaffected	0	unaffected	unaffected
ZK993.1	chrI	1128326	1131740	0	unaffected	0	unaffected	unaffected
Y48G8AL.9	chrI	1136367	1141024	0	unaffected	0	unaffected	unaffected
Y48G8AL.10	chrI	1142032	1154389	0	unaffected	0	unaffected	unaffected
Y48G8AL.14	chrI	1155345	1156023	0	unaffected	0	unaffected	unaffected
Y48G8AL.8	chrI	1156579	1157465	0	unaffected	0	unaffected	unaffected
Y48G8AL.7	chrI	1157571	1162903	0	unaffected	0	unaffected	unaffected
Y48G8AL.11	chrI	1162891	1175871	0	unaffected	0	unaffected	unaffected
Y48G8AL.6	chrI	1176475	1190070	0	unaffected	0	unaffected	unaffected
Y48G8AL.5	chrI	1193160	1207868	0	unaffected	0	unaffected	unaffected
Y48G8AL.1	chrI	1211492	1254700	0	unaffected	0	unaffected	unaffected
Y48G8AL.16	chrI	1214966	1217277	0	unaffected	0	unaffected	unaffected
Y48G8AL.12	chrI	1218496	1218985	0	unaffected	0	unaffected	unaffected
Y48G8AL.13	chrI	1223958	1229284	0	unaffected	0	unaffected	unaffected
Y48G8AL.15	chrI	1254771	1258598	0	unaffected	0	unaffected	unaffected
Y48G8AR.1	chrI	1259490	1268157	0	unaffected	0	unaffected	unaffected
Y48G8AR.2	chrI	1282100	1285437	0	unaffected	0	unaffected	unaffected
Y48G8AR.3	chrI	1287305	1287961	0	unaffected	0	unaffected	unaffected
K12C11.4	chrI	1305576	1328447	0	unaffected	0	unaffected	unaffected
K12C11.5	chrI	1332699	1334080	0	unaffected	0	unaffected	unaffected
K12C11.3	chrI	1335376	1336872	0	unaffected	0	unaffected	unaffected
K12C11.6	chrI	1337021	1338122	0	unaffected	0	unaffected	unaffected
K12C11.7	chrI	1338786	1339771	0	unaffected	0	unaffected	unaffected
K12C11.2	chrI	1340679	1341260	0	unaffected	0	unaffected	unaffected
K12C11.1	chrI	1340742	1344696	0	unaffected	0	unaffected	unaffected
Y92H12BL.1	chrI	1348504	1359597	0	unaffected	0	unaffected	unaffected
Y92H12BL.5	chrI	1365310	1375885	0	unaffected	0	unaffected	unaffected
Y92H12BL.4	chrI	1376943	1385059	0	unaffected	0	unaffected	unaffected
Y92H12BM.1	chrI	1386258	1392761	0	unaffected	0	unaffected	unaffected
Y92H12BR.7	chrI	1394570	1402944	0	unaffected	0	unaffected	unaffected
Y92H12BR.6	chrI	1405945	1413073	0	unaffected	0	unaffected	unaffected
Y92H12BR.2	chrI	1413916	1415811	0	unaffected	0	unaffected	unaffected
Y92H12BR.3	chrI	1416592	1424610	0	unaffected	0	unaffected	unaffected
Y92H12BR.4	chrI	1433016	1433853	0	unaffected	0	unaffected	unaffected
Y92H12BR.8	chrI	1436280	1441316	0	unaffected	0	unaffected	unaffected
F37F2.2	chrI	1441667	1444135	0	unaffected	0	unaffected	unaffected
F47G6.4	chrI	1446667	1465342	0	unaffected	0	unaffected	unaffected
F37F2.3	chrI	1451123	1453079	0	unaffected	0	unaffected	unaffected
F47G6.3	chrI	1465611	1469588	0	unaffected	0	unaffected	unaffected
F47G6.2	chrI	1471298	1479926	0	unaffected	0	unaffected	unaffected
F47G6.1	chrI	1483084	1491282	0	unaffected	0	unaffected	unaffected
Y92H12A.5	chrI	1491341	1514411	0	unaffected	0	unaffected	unaffected
Y92H12A.4	chrI	1514763	1527351	0	unaffected	0	unaffected	unaffected
Y92H12A.3	chrI	1529890	1534238	0	unaffected	0	unaffected	unaffected
Y92H12A.2	chrI	1543526	1556197	0	unaffected	0	unaffected	unaffected
Y92H12A.1	chrI	1566932	1580205	0	unaffected	0	unaffected	unaffected
Y73E7A.3	chrI	1586168	1593676	0	unaffected	0	unaffected	unaffected
Y73E7A.4	chrI	1594657	1596177	0	unaffected	0	unaffected	unaffected
Y73E7A.5	chrI	1600625	1601498	0	unaffected	0	unaffected	unaffected
Y73E7A.2	chrI	1601841	1606883	0	unaffected	0	unaffected	unaffected
Y73E7A.6	chrI	1607680	1610136	0	unaffected	0	unaffected	unaffected
Y73E7A.9	chrI	1610391	1619945	0	unaffected	0	unaffected	unaffected
Y73E7A.7	chrI	1621352	1626607	0	unaffected	0	unaffected	unaffected
Y73E7A.1	chrI	1629004	1633498	0	unaffected	0	unaffected	unaffected
Y73E7A.8	chrI	1634741	1644657	0	unaffected	0	unaffected	unaffected
Y71G12B.20	chrI	1644589	1651382	0	unaffected	0	unaffected	unaffected
Y71G12B.18	chrI	1652915	1655443	0	unaffected	0	unaffected	unaffected
Y71G12B.21	chrI	1655646	1656728	0	unaffected	0	unaffected	unaffected
Y71G12B.33	chrI	1657631	1663323	0	unaffected	0	unaffected	unaffected
Y71G12B.22	chrI	1663401	1666770	0	unaffected	0	unaffected	unaffected
Y71G12B.17	chrI	1667502	1669776	0	unaffected	0	unaffected	unaffected
Y71G12B.23	chrI	1670080	1672744	0	unaffected	0	unaffected	unaffected
Y71G12B.35	chrI	1672872	1676432	0	unaffected	0	unaffected	unaffected
Y71G12B.16	chrI	1680451	1685065	0	unaffected	0	unaffected	unaffected
Y71G12B.31	chrI	1686217	1691613	0	unaffected	0	unaffected	unaffected
Y71G12B.15	chrI	1698095	1701132	0	unaffected	0	unaffected	unaffected
Y71G12B.14	chrI	1701359	1701810	0	unaffected	0	unaffected	unaffected
Y71G12B.13	chrI	1702124	1707892	0	unaffected	0	unaffected	unaffected
Y71G12B.12	chrI	1709098	1715570	0	unaffected	0	unaffected	unaffected
Y71G12B.11	chrI	1721593	1740920	0	unaffected	0	unaffected	unaffected
Y71G12B.24	chrI	1740648	1751057	0	unaffected	0	unaffected	unaffected
Y71G12B.10	chrI	1751482	1754412	0	unaffected	0	unaffected	unaffected
Y71G12B.9	chrI	1755330	1766469	0	unaffected	0	unaffected	unaffected
Y71G12B.8	chrI	1767888	1790205	0	unaffected	0	unaffected	unaffected
Y71G12B.25	chrI	1771370	1775935	0	unaffected	0	unaffected	unaffected
Y71G12B.26	chrI	1779840	1782588	0	unaffected	0	unaffected	unaffected
Y71G12B.7	chrI	1792456	1792900	0	unaffected	0	unaffected	unaffected
Y71G12B.6	chrI	1793253	1796427	0	unaffected	0	unaffected	unaffected
Y71G12B.27	chrI	1797436	1798697	0	unaffected	0	unaffected	unaffected
Y71G12B.5	chrI	1799718	1807011	0	unaffected	0	unaffected	unaffected
Y71G12B.4	chrI	1808092	1811784	0	unaffected	0	unaffected	unaffected
Y71G12B.3	chrI	1812956	1813586	0	unaffected	0	unaffected	unaffected
Y71G12B.32	chrI	1814103	1816063	0	unaffected	0	unaffected	unaffected
Y71G12B.2	chrI	1816151	1818511	0	unaffected	0	unaffected	unaffected
Y71G12B.30	chrI	1818514	1822933	0	unaffected	0	unaffected	unaffected
Y71G12B.1	chrI	1823446	1825969	0	unaffected	0	unaffected	unaffected
Y71G12B.28	chrI	1829771	1832064	0	unaffected	0	unaffected	unaffected
C53H9.3	chrI	1832116	1832643	0	unaffected	0	unaffected	unaffected
C53H9.2	chrI	1832896	1834766	0	unaffected	0	unaffected	unaffected
C53H9.1	chrI	1834882	1835441	0	unaffected	0	unaffected	unaffected
M01D7.7	chrI	1835680	1841274	0	unaffected	0	unaffected	unaffected
M01D7.6	chrI	1842444	1843521	0	unaffected	0	unaffected	unaffected
M01D7.5	chrI	1843354	1843971	0	unaffected	0	unaffected	unaffected
M01D7.4	chrI	1845222	1850518	0	unaffected	0	unaffected	unaffected
M01D7.9	chrI	1851684	1855128	0	unaffected	0	unaffected	unaffected
M01D7.1	chrI	1857893	1860624	0	unaffected	0	unaffected	unaffected
M01D7.2	chrI	1862613	1872308	0	unaffected	0	unaffected	unaffected
Y71G12A.3	chrI	1874148	1883474	0	unaffected	0	unaffected	unaffected
Y71G12A.4	chrI	1885206	1894865	0	unaffected	0	unaffected	unaffected
Y71G12A.2	chrI	1895162	1910515	0	unaffected	0	unaffected	unaffected
Y51F10.7	chrI	1911679	1913968	0	unaffected	0	unaffected	unaffected
Y51F10.6	chrI	1917046	1923098	0	unaffected	0	unaffected	unaffected
Y51F10.5	chrI	1924301	1932262	0	unaffected	0	unaffected	unaffected
Y51F10.4	chrI	1932353	1945224	0	unaffected	0	unaffected	unaffected
Y51F10.10	chrI	1950599	1958514	0	unaffected	0	unaffected	unaffected
Y51F10.11	chrI	1961617	1964975	0	unaffected	0	unaffected	unaffected
Y51F10.3	chrI	1967820	1973885	0	unaffected	0	unaffected	unaffected
Y51F10.2	chrI	1978006	1983439	0	unaffected	0	unaffected	unaffected
Y20F4.3	chrI	1988725	2010482	0	unaffected	0	unaffected	unaffected
Y20F4.2	chrI	2026318	2033951	0	unaffected	0	unaffected	unaffected
Y20F4.4	chrI	2034326	2043814	0	unaffected	0	unaffected	unaffected
Y20F4.8	chrI	2049142	2050180	0	unaffected	0	unaffected	unaffected
Y20F4.5	chrI	2050816	2053704	0	unaffected	0	unaffected	unaffected
Y37E3.1	chrI	2061669	2064019	0	unaffected	0	unaffected	unaffected
Y37E3.3	chrI	2064295	2065121	0	unaffected	0	unaffected	unaffected
Y37E3.4	chrI	2064954	2065710	0	unaffected	0	unaffected	unaffected
Y37E3.5	chrI	2065729	2069052	0	unaffected	0	unaffected	unaffected
Y37E3.7	chrI	2069043	2069590	0	unaffected	0	unaffected	unaffected
Y37E3.8	chrI	2069681	2070612	0	unaffected	0	unaffected	unaffected
Y37E3.9	chrI	2071352	2072552	0	unaffected	0	unaffected	unaffected
Y37E3.10	chrI	2072679	2076909	0	unaffected	0	unaffected	unaffected
Y37E3.11	chrI	2078961	2085681	0	unaffected	0	unaffected	unaffected
Y37E3.13	chrI	2085675	2093853	0	unaffected	0	unaffected	unaffected
Y37E3.15	chrI	2097348	2123445	0	unaffected	0	unaffected	unaffected
Y37E3.19	chrI	2107404	2108632	0	unaffected	0	unaffected	unaffected
Y37E3.16	chrI	2113650	2118553	0	unaffected	0	unaffected	unaffected
Y37E3.17	chrI	2128592	2145971	0	unaffected	0	unaffected	unaffected
W03F11.5	chrI	2216101	2219486	0	unaffected	0	unaffected	unaffected
W03F11.1	chrI	2219472	2222315	0	unaffected	0	unaffected	unaffected
W03F11.2	chrI	2223308	2233193	0	unaffected	0	unaffected	unaffected
W03F11.3	chrI	2233752	2234908	0	unaffected	0	unaffected	unaffected
W03F11.4	chrI	2235609	2241359	0	unaffected	0	unaffected	unaffected
F12B6.3	chrI	2242231	2247296	0	unaffected	0	unaffected	unaffected
F12B6.2	chrI	2250132	2254894	0	unaffected	0	unaffected	unaffected
F12B6.1	chrI	2255924	2272868	0	unaffected	0	unaffected	unaffected
Y39G10AL.1	chrI	2279835	2280869	0	unaffected	0	unaffected	unaffected
Y39G10AL.3	chrI	2280916	2291185	0	unaffected	0	unaffected	unaffected
Y39G10AR.11	chrI	2293133	2297320	0	unaffected	0	unaffected	unaffected
Y39G10AR.12	chrI	2297281	2304397	0	unaffected	0	unaffected	unaffected
Y39G10AR.10	chrI	2300085	2302826	0	unaffected	0	unaffected	unaffected
Y39G10AR.13	chrI	2304471	2306818	0	unaffected	0	unaffected	unaffected
Y39G10AR.9	chrI	2306986	2308973	0	unaffected	0	unaffected	unaffected
Y39G10AR.21	chrI	2308973	2312132	0	unaffected	0	unaffected	unaffected
Y39G10AR.20	chrI	2312497	2313081	0	unaffected	0	unaffected	unaffected
Y39G10AR.8	chrI	2313270	2316015	0	unaffected	0	unaffected	unaffected
Y39G10AR.7	chrI	2316308	2318307	0	unaffected	0	unaffected	unaffected
Y39G10AR.14	chrI	2318292	2321849	0	unaffected	0	unaffected	unaffected
Y39G10AR.15	chrI	2322030	2327331	0	unaffected	0	unaffected	unaffected
Y39G10AR.22	chrI	2327990	2330164	0	unaffected	0	unaffected	unaffected
Y39G10AR.16	chrI	2330896	2332637	0	unaffected	0	unaffected	unaffected
Y39G10AR.6	chrI	2333327	2338690	0	unaffected	0	unaffected	unaffected
Y39G10AR.5	chrI	2342217	2350470	0	unaffected	0	unaffected	unaffected
Y39G10AR.25	chrI	2352836	2356157	0	unaffected	0	unaffected	unaffected
Y39G10AR.3	chrI	2357884	2372966	0	unaffected	0	unaffected	unaffected
Y39G10AR.17	chrI	2377090	2381853	0	unaffected	0	unaffected	unaffected
Y39G10AR.18	chrI	2382953	2401490	0	unaffected	0	unaffected	unaffected
Y39G10AR.2	chrI	2402233	2409989	0	unaffected	0	unaffected	unaffected
F23C8.13	chrI	2415134	2418523	0	unaffected	0	unaffected	unaffected
F23C8.5	chrI	2418451	2420822	0	unaffected	0	unaffected	unaffected
F23C8.6	chrI	2420832	2421744	0	unaffected	0	unaffected	unaffected
F23C8.7	chrI	2422335	2425075	0	unaffected	0	unaffected	unaffected
F23C8.8	chrI	2429684	2432583	0	unaffected	0	unaffected	unaffected
F23C8.9	chrI	2431708	2433615	0	unaffected	0	unaffected	unaffected
F23C8.4	chrI	2434005	2435711	0	unaffected	0	unaffected	unaffected
F23C8.3	chrI	2438802	2442950	0	unaffected	0	unaffected	unaffected
F23C8.1	chrI	2446764	2448347	0	unaffected	0	unaffected	unaffected
F23C8.11	chrI	2449415	2450685	0	unaffected	0	unaffected	unaffected
F23C8.12	chrI	2451148	2451809	0	unaffected	0	unaffected	unaffected
T16H5.1	chrI	2451909	2464639	0	unaffected	0	unaffected	unaffected
Y74C10AL.2	chrI	2468788	2472369	0	unaffected	0	unaffected	unaffected
Y74C10AR.3	chrI	2472071	2485384	0	unaffected	0	unaffected	unaffected
Y74C10AR.2	chrI	2482685	2483730	0	unaffected	0	unaffected	unaffected
Y74C10AR.1	chrI	2485869	2489775	0	unaffected	0	unaffected	unaffected
Y23H5B.6	chrI	2489977	2497385	0	unaffected	0	unaffected	unaffected
Y23H5B.5	chrI	2498135	2506257	0	unaffected	0	unaffected	unaffected
Y23H5B.7	chrI	2506780	2513828	0	unaffected	0	unaffected	unaffected
Y23H5B.4	chrI	2533269	2542094	0	unaffected	0	unaffected	unaffected
Y23H5B.3	chrI	2544750	2546190	0	unaffected	0	unaffected	unaffected
Y23H5B.8	chrI	2546898	2548329	0	unaffected	0	unaffected	unaffected
Y23H5B.2	chrI	2549297	2550200	0	unaffected	0	unaffected	unaffected
Y23H5B.1	chrI	2553035	2555426	0	unaffected	0	unaffected	unaffected
C55C2.4	chrI	2558301	2560112	0	unaffected	0	unaffected	unaffected
C55C2.3	chrI	2560397	2561822	0	unaffected	0	unaffected	unaffected
C55C2.2	chrI	2562659	2563051	0	unaffected	0	unaffected	unaffected
C55C2.1	chrI	2568761	2570748	0	unaffected	0	unaffected	unaffected
C55C2.5	chrI	2571777	2576024	0	unaffected	0	unaffected	unaffected
K07A3.1	chrI	2580936	2586128	0	unaffected	0	unaffected	unaffected
K07A3.2	chrI	2587542	2595282	0	unaffected	0	unaffected	unaffected
K07A3.3	chrI	2599980	2602651	0	unaffected	0	unaffected	unaffected
Y23H5A.5	chrI	2606755	2617363	0	unaffected	0	unaffected	unaffected
Y23H5A.4	chrI	2617561	2620427	0	unaffected	0	unaffected	unaffected
Y23H5A.3	chrI	2620655	2621860	0	unaffected	0	unaffected	unaffected
Y23H5A.2	chrI	2621956	2623272	0	unaffected	0	unaffected	unaffected
Y23H5A.7	chrI	2623102	2628579	0	unaffected	0	unaffected	unaffected
Y23H5A.8	chrI	2633008	2634643	0	unaffected	0	unaffected	unaffected
F40E3.7	chrI	2636905	2637593	0	unaffected	0	unaffected	unaffected
F40E3.2	chrI	2642723	2643773	0	unaffected	0	unaffected	unaffected
F40E3.5	chrI	2645267	2657243	0	unaffected	0	unaffected	unaffected
F40E3.6	chrI	2650738	2651713	0	unaffected	0	unaffected	unaffected
F32B5.6	chrI	2668161	2672431	0	unaffected	0	unaffected	unaffected
F32B5.7	chrI	2672948	2682799	0	unaffected	0	unaffected	unaffected
F32B5.8	chrI	2686641	2689475	0	unaffected	0	unaffected	unaffected
F32B5.4	chrI	2692078	2692471	0	unaffected	0	unaffected	unaffected
F32B5.3	chrI	2692758	2694086	0	unaffected	0	unaffected	unaffected
F32B5.2	chrI	2697441	2699957	0	unaffected	0	unaffected	unaffected
F32B5.1	chrI	2700421	2702084	0	unaffected	0	unaffected	unaffected
Y71F9B.5	chrI	2706884	2717551	0	unaffected	0	unaffected	unaffected
Y71F9B.16	chrI	2718027	2721479	0	unaffected	0	unaffected	unaffected
Y71F9B.6	chrI	2722520	2726660	0	unaffected	0	unaffected	unaffected
Y71F9B.4	chrI	2726657	2727547	0	unaffected	0	unaffected	unaffected
Y71F9B.3	chrI	2730003	2731456	0	unaffected	0	unaffected	unaffected
Y71F9B.2	chrI	2731565	2735543	0	unaffected	0	unaffected	unaffected
Y71F9B.8	chrI	2735346	2742510	0	unaffected	0	unaffected	unaffected
Y71F9B.7	chrI	2755580	2758213	0	unaffected	0	unaffected	unaffected
Y71F9B.9	chrI	2759024	2761042	0	unaffected	0	unaffected	unaffected
Y71F9B.10	chrI	2761158	2776105	0	unaffected	0	unaffected	unaffected
Y71F9B.1	chrI	2774911	2775424	0	unaffected	0	unaffected	unaffected
Y71F9B.13	chrI	2776371	2778721	0	unaffected	0	unaffected	unaffected
Y71F9B.14	chrI	2780851	2782773	0	unaffected	0	unaffected	unaffected
W03D8.9	chrI	2784618	2786070	0	unaffected	0	unaffected	unaffected
W03D8.10	chrI	2786136	2787514	0	unaffected	0	unaffected	unaffected
W03D8.1	chrI	2787856	2790333	0	unaffected	0	unaffected	unaffected
W03D8.8	chrI	2791690	2794897	0	unaffected	0	unaffected	unaffected
W03D8.2	chrI	2798214	2799891	0	unaffected	0	unaffected	unaffected
W03D8.6	chrI	2802823	2815788	0	unaffected	0	unaffected	unaffected
W03D8.5	chrI	2816462	2817648	0	unaffected	0	unaffected	unaffected
W03D8.11	chrI	2818767	2820817	0	unaffected	0	unaffected	unaffected
W03D8.3	chrI	2820844	2822759	0	unaffected	0	unaffected	unaffected
W10C8.2	chrI	2823469	2830295	0	unaffected	0	unaffected	unaffected
W10C8.3	chrI	2832873	2833255	0	unaffected	0	unaffected	unaffected
W10C8.1	chrI	2846721	2849794	0	unaffected	0	unaffected	unaffected
W10C8.4	chrI	2851964	2853857	0	unaffected	0	unaffected	unaffected
W10C8.5	chrI	2853971	2855736	0	unaffected	0	unaffected	unaffected
W10C8.6	chrI	2858516	2859849	0	unaffected	0	unaffected	unaffected
Y71F9AL.11	chrI	2862404	2864466	0	unaffected	0	unaffected	unaffected
Y71F9AL.10	chrI	2866430	2869378	0	unaffected	0	unaffected	unaffected
Y71F9AL.12	chrI	2871258	2875291	0	unaffected	0	unaffected	unaffected
Y71F9AL.13	chrI	2875396	2876326	0	unaffected	0	unaffected	unaffected
Y71F9AL.9	chrI	2876931	2878519	0	unaffected	0	unaffected	unaffected
Y71F9AL.8	chrI	2878579	2880938	0	unaffected	0	unaffected	unaffected
Y71F9AL.14	chrI	2880870	2883456	0	unaffected	0	unaffected	unaffected
Y71F9AL.16	chrI	2883497	2893720	0	unaffected	0	unaffected	unaffected
Y71F9AL.7	chrI	2887801	2889436	0	unaffected	0	unaffected	unaffected
Y71F9AL.6	chrI	2890447	2891263	0	unaffected	0	unaffected	unaffected
Y71F9AL.17	chrI	2895329	2900862	0	unaffected	0	unaffected	unaffected
Y71F9AL.5	chrI	2901336	2903007	0	unaffected	0	unaffected	unaffected
Y71F9AL.4	chrI	2903597	2907753	0	unaffected	0	unaffected	unaffected
Y71F9AL.18	chrI	2907723	2924717	0	unaffected	0	unaffected	unaffected
Y71F9AL.2	chrI	2915177	2918808	0	unaffected	0	unaffected	unaffected
Y71F9AL.1	chrI	2924933	2928140	0	unaffected	0	unaffected	unaffected
Y71F9AM.6	chrI	2928394	2929681	0	unaffected	0	unaffected	unaffected
Y71F9AM.5	chrI	2929778	2931363	0	unaffected	0	unaffected	unaffected
Y71F9AM.4	chrI	2931461	2947154	0	unaffected	0	unaffected	unaffected
Y71F9AM.8	chrI	2940911	2941585	0	unaffected	0	unaffected	unaffected
Y71F9AR.1	chrI	2949610	2957878	0	unaffected	0	unaffected	unaffected
Y71F9AR.4	chrI	2981652	2983074	0	unaffected	0	unaffected	unaffected
Y71F9AR.2	chrI	2983264	2985169	0	unaffected	0	unaffected	unaffected
Y71F9AR.3	chrI	2986108	2995915	0	unaffected	0	unaffected	unaffected
Y54E10BL.4	chrI	2996407	3001380	0	unaffected	0	unaffected	unaffected
Y54E10BL.5	chrI	3001348	3002851	0	unaffected	0	unaffected	unaffected
Y54E10BL.3	chrI	3003528	3005943	0	unaffected	0	unaffected	unaffected
Y54E10BL.6	chrI	3005428	3013450	0	unaffected	0	unaffected	unaffected
Y54E10BL.2	chrI	3010691	3011661	0	unaffected	0	unaffected	unaffected
Y54E10BL.1	chrI	3012112	3012442	0	unaffected	0	unaffected	unaffected
Y54E10BR.4	chrI	3015743	3021537	0	unaffected	0	unaffected	unaffected
Y54E10BR.3	chrI	3021650	3028386	0	unaffected	0	unaffected	unaffected
Y54E10BR.5	chrI	3028328	3031096	0	unaffected	0	unaffected	unaffected
Y54E10BR.6	chrI	3031213	3032940	0	unaffected	0	unaffected	unaffected
Y54E10BR.2	chrI	3032968	3034763	0	unaffected	0	unaffected	unaffected
Y54E10BR.7	chrI	3035239	3047796	0	unaffected	0	unaffected	unaffected
Y54E10BR.8	chrI	3052050	3059167	0	unaffected	0	unaffected	unaffected
Y54E10BR.1	chrI	3059252	3069395	0	unaffected	0	unaffected	unaffected
M01B12.3	chrI	3069233	3070142	0	unaffected	0	unaffected	unaffected
M01B12.4	chrI	3070971	3084878	0	unaffected	0	unaffected	unaffected
M01B12.5	chrI	3084743	3096277	0	unaffected	0	unaffected	unaffected
C45E1.1	chrI	3104364	3109544	0	unaffected	0	unaffected	unaffected
C45E1.5	chrI	3109649	3110674	0	unaffected	0	unaffected	unaffected
C45E1.4	chrI	3115037	3125147	0	unaffected	0	unaffected	unaffected
K09H9.3	chrI	3137189	3138448	0	unaffected	0	unaffected	unaffected
K09H9.8	chrI	3138540	3140603	0	unaffected	0	unaffected	unaffected
K09H9.5	chrI	3141706	3143177	0	unaffected	0	unaffected	unaffected
K09H9.6	chrI	3144412	3147861	0	unaffected	0	unaffected	unaffected
K09H9.2	chrI	3147997	3150349	0	unaffected	0	unaffected	unaffected
K09H9.7	chrI	3150410	3152005	0	unaffected	0	unaffected	unaffected
K09H9.1	chrI	3152836	3155570	0	unaffected	0	unaffected	unaffected
Y54E10A.9	chrI	3158515	3162378	0	unaffected	0	unaffected	unaffected
Y54E10A.7	chrI	3162808	3163651	0	unaffected	0	unaffected	unaffected
Y54E10A.6	chrI	3163689	3167557	0	unaffected	0	unaffected	unaffected
Y54E10A.5	chrI	3167687	3171232	0	unaffected	0	unaffected	unaffected
Y54E10A.10	chrI	3173244	3176323	0	unaffected	0	unaffected	unaffected
Y54E10A.11	chrI	3176421	3192845	0	unaffected	0	unaffected	unaffected
Y54E10A.12	chrI	3193438	3198842	0	unaffected	0	unaffected	unaffected
Y54E10A.13	chrI	3199541	3203231	0	unaffected	0	unaffected	unaffected
Y54E10A.17	chrI	3206711	3209305	0	unaffected	0	unaffected	unaffected
Y54E10A.4	chrI	3211047	3217367	0	unaffected	0	unaffected	unaffected
Y54E10A.14	chrI	3217289	3222952	0	unaffected	0	unaffected	unaffected
Y54E10A.15	chrI	3223155	3228024	0	unaffected	0	unaffected	unaffected
Y54E10A.3	chrI	3229430	3233619	0	unaffected	0	unaffected	unaffected
Y54E10A.2	chrI	3233392	3255567	0	unaffected	0	unaffected	unaffected
Y54E10A.16	chrI	3244151	3246166	0	unaffected	0	unaffected	unaffected
Y44E3B.2	chrI	3259872	3264590	0	unaffected	0	unaffected	unaffected
Y44E3B.1	chrI	3264257	3266764	0	unaffected	0	unaffected	unaffected
W01B11.3	chrI	3267093	3269150	0	unaffected	0	unaffected	unaffected
W01B11.5	chrI	3269404	3280885	0	unaffected	0	unaffected	unaffected
W01B11.2	chrI	3287383	3293173	0	unaffected	0	unaffected	unaffected
W01B11.6	chrI	3293169	3294360	0	unaffected	0	unaffected	unaffected
W01B11.1	chrI	3299607	3300492	0	unaffected	0	unaffected	unaffected
Y44E3A.2	chrI	3301517	3307467	0	unaffected	0	unaffected	unaffected
Y44E3A.3	chrI	3317979	3318588	0	unaffected	0	unaffected	unaffected
Y44E3A.4	chrI	3320922	3330675	0	unaffected	0	unaffected	unaffected
Y44E3A.1	chrI	3338368	3340046	0	unaffected	0	unaffected	unaffected
Y44E3A.6	chrI	3340024	3349902	0	unaffected	0	unaffected	unaffected
W05F2.7	chrI	3352464	3359435	0	unaffected	0	unaffected	unaffected
W05F2.8	chrI	3362370	3363364	0	unaffected	0	unaffected	unaffected
W05F2.2	chrI	3363821	3365859	0	unaffected	0	unaffected	unaffected
W05F2.3	chrI	3367640	3368554	0	unaffected	0	unaffected	unaffected
W05F2.6	chrI	3368815	3371449	0	unaffected	0	unaffected	unaffected
W05F2.5	chrI	3371756	3373908	0	unaffected	0	unaffected	unaffected
W05F2.4	chrI	3374781	3402868	0	unaffected	0	unaffected	unaffected
K03E5.3	chrI	3408034	3415072	0	unaffected	0	unaffected	unaffected
K03E5.2	chrI	3419474	3424213	0	unaffected	0	unaffected	unaffected
K03E5.1	chrI	3427178	3433095	0	unaffected	0	unaffected	unaffected
Y47G6A.12	chrI	3433158	3438545	0	unaffected	0	unaffected	unaffected
Y47G6A.28	chrI	3439109	3449179	0	unaffected	0	unaffected	unaffected
Y47G6A.13	chrI	3439419	3442190	0	unaffected	0	unaffected	unaffected
Y47G6A.11	chrI	3449328	3462173	0	unaffected	0	unaffected	unaffected
Y47G6A.14	chrI	3462269	3468189	0	unaffected	0	unaffected	unaffected
Y47G6A.10	chrI	3467133	3477973	0	unaffected	0	unaffected	unaffected
Y47G6A.15	chrI	3472963	3476313	0	unaffected	0	unaffected	unaffected
Y47G6A.9	chrI	3479330	3481441	0	unaffected	0	unaffected	unaffected
Y47G6A.8	chrI	3481988	3484502	0	unaffected	0	unaffected	unaffected
Y47G6A.17	chrI	3487805	3499709	0	unaffected	0	unaffected	unaffected
Y47G6A.7	chrI	3502738	3508427	0	unaffected	0	unaffected	unaffected
Y47G6A.18	chrI	3508400	3512738	0	unaffected	0	unaffected	unaffected
Y47G6A.6	chrI	3516480	3523390	0	unaffected	0	unaffected	unaffected
Y47G6A.19	chrI	3523336	3529959	0	unaffected	0	unaffected	unaffected
Y47G6A.30	chrI	3523876	3524593	0	unaffected	0	unaffected	unaffected
Y47G6A.5	chrI	3533996	3539159	0	unaffected	0	unaffected	unaffected
Y47G6A.20	chrI	3539045	3546907	0	unaffected	0	unaffected	unaffected
Y47G6A.4	chrI	3547093	3552015	0	unaffected	0	unaffected	unaffected
Y47G6A.21	chrI	3551953	3559812	0	unaffected	0	unaffected	unaffected
Y47G6A.27	chrI	3555583	3557403	0	unaffected	0	unaffected	unaffected
Y47G6A.22	chrI	3559919	3562862	0	unaffected	0	unaffected	unaffected
Y47G6A.33	chrI	3564066	3565069	0	unaffected	0	unaffected	unaffected
Y47G6A.23	chrI	3565042	3578691	0	unaffected	0	unaffected	unaffected
Y47G6A.29	chrI	3578694	3600680	0	unaffected	0	unaffected	unaffected
Y47G6A.3	chrI	3601293	3602911	0	unaffected	0	unaffected	unaffected
Y47G6A.31	chrI	3603345	3604522	0	unaffected	0	unaffected	unaffected
Y47G6A.24	chrI	3604516	3605760	0	unaffected	0	unaffected	unaffected
Y47G6A.25	chrI	3606412	3608348	0	unaffected	0	unaffected	unaffected
Y47G6A.2	chrI	3608397	3611847	0	unaffected	0	unaffected	unaffected
Y47G6A.1	chrI	3611911	3618321	0	unaffected	0	unaffected	unaffected
Y47G6A.26	chrI	3618892	3619700	0	unaffected	0	unaffected	unaffected
Y47G6A.32	chrI	3620584	3625090	0	unaffected	0	unaffected	unaffected
T28F2.3	chrI	3629473	3630747	0	unaffected	0	unaffected	unaffected
T28F2.4	chrI	3631092	3636488	0	unaffected	0	unaffected	unaffected
T28F2.2	chrI	3637355	3638822	0	unaffected	0	unaffected	unaffected
T28F2.1	chrI	3639650	3641394	0	unaffected	0	unaffected	unaffected
T28F2.5	chrI	3641655	3647012	0	unaffected	0	unaffected	unaffected
T28F2.6	chrI	3651232	3652602	0	unaffected	0	unaffected	unaffected
T28F2.8	chrI	3653960	3655332	0	unaffected	0	unaffected	unaffected
T28F2.7	chrI	3655555	3661048	0	unaffected	0	unaffected	unaffected
D1037.2	chrI	3667126	3671705	0	unaffected	0	unaffected	unaffected
D1037.3	chrI	3680180	3680947	0	unaffected	0	unaffected	unaffected
D1037.4	chrI	3682875	3684121	0	unaffected	0	unaffected	unaffected
D1037.1	chrI	3684804	3690157	0	unaffected	0	unaffected	unaffected
D1037.5	chrI	3690147	3694017	0	unaffected	0	unaffected	unaffected
H26D21.2	chrI	3694301	3697554	0	unaffected	0	unaffected	unaffected
H26D21.1	chrI	3698097	3699303	0	unaffected	0	unaffected	unaffected
F21A9.2	chrI	3706038	3709223	0	unaffected	0	unaffected	unaffected
F21A9.1	chrI	3712175	3713137	0	unaffected	0	unaffected	unaffected
T12F5.4	chrI	3713139	3721160	0	unaffected	0	unaffected	unaffected
T12F5.3	chrI	3726013	3731227	0	unaffected	0	unaffected	unaffected
T12F5.2	chrI	3731354	3732925	0	unaffected	0	unaffected	unaffected
T12F5.5	chrI	3732882	3740482	0	unaffected	0	unaffected	unaffected
T12F5.1	chrI	3741459	3742726	0	unaffected	0	unaffected	unaffected
Y8G1A.1	chrI	3745591	3748223	0	unaffected	0	unaffected	unaffected
Y8G1A.2	chrI	3748527	3753964	0	unaffected	0	unaffected	unaffected
ZK770.3	chrI	3755472	3759076	0	unaffected	0	unaffected	unaffected
ZK770.1	chrI	3769683	3773879	0	unaffected	0	unaffected	unaffected
C32E8.12	chrI	3773873	3774578	0	unaffected	0	unaffected	unaffected
C32E8.6	chrI	3774708	3777471	0	unaffected	0	unaffected	unaffected
C32E8.7	chrI	3778092	3781661	0	unaffected	0	unaffected	unaffected
C32E8.5	chrI	3782120	3783299	0	unaffected	0	unaffected	unaffected
C32E8.4	chrI	3783837	3784438	0	unaffected	0	unaffected	unaffected
C32E8.3	chrI	3786596	3787498	0	unaffected	0	unaffected	unaffected
C32E8.2	chrI	3788036	3788914	0	unaffected	0	unaffected	unaffected
C32E8.8	chrI	3789308	3792800	0	unaffected	0	unaffected	unaffected
C32E8.9	chrI	3794555	3798056	0	unaffected	0	unaffected	unaffected
C32E8.1	chrI	3796155	3796699	0	unaffected	0	unaffected	unaffected
C32E8.10	chrI	3799126	3805721	0	unaffected	0	unaffected	unaffected
C32E8.11	chrI	3807459	3816799	0	unaffected	0	unaffected	unaffected
F53F10.5	chrI	3817998	3821506	0	unaffected	0	unaffected	unaffected
F53F10.4	chrI	3824947	3826517	0	unaffected	0	unaffected	unaffected
F53F10.3	chrI	3827210	3828146	0	unaffected	0	unaffected	unaffected
F53F10.8	chrI	3828252	3829396	0	unaffected	0	unaffected	unaffected
F53F10.2	chrI	3830941	3834127	0	unaffected	0	unaffected	unaffected
F53F10.1	chrI	3834119	3837768	0	unaffected	0	unaffected	unaffected
T03F1.5	chrI	3838239	3839902	0	unaffected	0	unaffected	unaffected
T03F1.6	chrI	3839811	3841561	0	unaffected	0	unaffected	unaffected
T03F1.11	chrI	3853837	3854242	0	unaffected	0	unaffected	unaffected
T03F1.7	chrI	3854163	3859297	0	unaffected	0	unaffected	unaffected
T03F1.8	chrI	3859380	3862732	0	unaffected	0	unaffected	unaffected
T03F1.9	chrI	3862777	3865941	0	unaffected	0	unaffected	unaffected
T03F1.3	chrI	3867541	3869136	0	unaffected	0	unaffected	unaffected
T03F1.2	chrI	3869221	3870127	0	unaffected	0	unaffected	unaffected
T03F1.10	chrI	3871473	3873419	0	unaffected	0	unaffected	unaffected
T03F1.1	chrI	3874039	3875999	0	unaffected	0	unaffected	unaffected
T03F1.12	chrI	3876045	3876707	0	unaffected	0	unaffected	unaffected
C50F2.3	chrI	3877063	3880758	0	unaffected	0	unaffected	unaffected
C50F2.2	chrI	3881830	3888456	0	unaffected	0	unaffected	unaffected
C50F2.10	chrI	3885550	3885964	0	unaffected	0	unaffected	unaffected
C50F2.9	chrI	3886113	3887083	0	unaffected	0	unaffected	unaffected
C50F2.4	chrI	3888333	3891521	0	unaffected	0	unaffected	unaffected
C50F2.1	chrI	3892334	3895274	0	unaffected	0	unaffected	unaffected
C50F2.5	chrI	3895794	3897403	0	unaffected	0	unaffected	unaffected
C50F2.6	chrI	3898048	3899909	0	unaffected	0	unaffected	unaffected
C50F2.7	chrI	3900331	3901383	0	unaffected	0	unaffected	unaffected
C50F2.8	chrI	3901434	3905203	0	unaffected	0	unaffected	unaffected
T20F5.2	chrI	3908747	3909926	0	unaffected	0	unaffected	unaffected
T20F5.3	chrI	3909630	3910547	0	unaffected	0	unaffected	unaffected
T20F5.8	chrI	3910714	3912474	0	unaffected	0	unaffected	unaffected
T20F5.4	chrI	3912639	3915461	0	unaffected	0	unaffected	unaffected
T20F5.5	chrI	3917881	3920175	0	unaffected	0	unaffected	unaffected
T20F5.6	chrI	3918463	3925174	0	unaffected	0	unaffected	unaffected
T20F5.7	chrI	3925435	3927890	0	unaffected	0	unaffected	unaffected
T21E3.2	chrI	3930832	3931555	0	unaffected	0	unaffected	unaffected
T21E3.1	chrI	3932212	3934817	0	unaffected	0	unaffected	unaffected
T21E3.3	chrI	3935271	3953945	0	unaffected	0	unaffected	unaffected
F47B3.4	chrI	3960976	3962202	0	unaffected	0	unaffected	unaffected
F47B3.5	chrI	3963117	3964180	0	unaffected	0	unaffected	unaffected
F47B3.3	chrI	3964372	3965317	0	unaffected	0	unaffected	unaffected
F47B3.6	chrI	3965740	3967078	0	unaffected	0	unaffected	unaffected
F47B3.7	chrI	3968166	3970015	0	unaffected	0	unaffected	unaffected
F28H1.4	chrI	3974113	3977354	0	unaffected	0	unaffected	unaffected
F28H1.5	chrI	3978495	3979530	0	unaffected	0	unaffected	unaffected
F28H1.3	chrI	3983173	3986918	0	unaffected	0	unaffected	unaffected
F28H1.2	chrI	3987893	3988705	0	unaffected	0	unaffected	unaffected
F28H1.1	chrI	3995711	3996966	0	unaffected	0	unaffected	unaffected
F55C7.7	chrI	3999344	4031629	0	unaffected	0	unaffected	unaffected
C09D1.1	chrI	4035745	4090963	0	unaffected	0	unaffected	unaffected
C09D1.2	chrI	4071800	4072850	0	unaffected	0	unaffected	unaffected
C24G7.4	chrI	4094611	4098331	0	unaffected	0	unaffected	unaffected
C24G7.2	chrI	4103714	4108047	0	unaffected	0	unaffected	unaffected
C24G7.1	chrI	4109408	4112387	0	unaffected	0	unaffected	unaffected
H31G24.4	chrI	4114735	4116371	0	unaffected	0	unaffected	unaffected
H31G24.3	chrI	4116852	4118164	0	unaffected	0	unaffected	unaffected
H31G24.1	chrI	4123482	4124725	0	unaffected	0	unaffected	unaffected
E01A2.3	chrI	4126057	4129312	0	unaffected	0	unaffected	unaffected
E01A2.4	chrI	4129565	4132294	0	unaffected	0	unaffected	unaffected
E01A2.2	chrI	4132501	4135418	0	unaffected	0	unaffected	unaffected
E01A2.5	chrI	4135241	4137076	0	unaffected	0	unaffected	unaffected
E01A2.6	chrI	4137157	4139025	0	unaffected	0	unaffected	unaffected
E01A2.1	chrI	4139515	4142821	0	unaffected	0	unaffected	unaffected
E01A2.7	chrI	4142284	4144585	0	unaffected	0	unaffected	unaffected
E01A2.10	chrI	4145277	4147138	0	unaffected	0	unaffected	unaffected
E01A2.8	chrI	4147246	4148257	0	unaffected	0	unaffected	unaffected
R12E2.15	chrI	4148833	4149431	0	unaffected	0	unaffected	unaffected
R12E2.14	chrI	4149982	4150639	0	unaffected	0	unaffected	unaffected
R12E2.6	chrI	4151100	4151748	0	unaffected	0	unaffected	unaffected
R12E2.7	chrI	4153958	4154552	0	unaffected	0	unaffected	unaffected
R12E2.8	chrI	4155543	4158735	0	unaffected	0	unaffected	unaffected
R12E2.9	chrI	4159015	4161115	0	unaffected	0	unaffected	unaffected
R12E2.5	chrI	4162036	4165017	0	unaffected	0	unaffected	unaffected
R12E2.4	chrI	4165134	4167061	0	unaffected	0	unaffected	unaffected
R12E2.10	chrI	4168988	4171591	0	unaffected	0	unaffected	unaffected
R12E2.11	chrI	4172439	4173628	0	unaffected	0	unaffected	unaffected
R12E2.12	chrI	4173751	4174778	0	unaffected	0	unaffected	unaffected
R12E2.3	chrI	4175318	4177274	0	unaffected	0	unaffected	unaffected
R12E2.13	chrI	4177306	4178451	0	unaffected	0	unaffected	unaffected
R12E2.2	chrI	4178811	4182160	0	unaffected	0	unaffected	unaffected
R12E2.1	chrI	4182220	4184994	0	unaffected	0	unaffected	unaffected
C18E3.7	chrI	4185061	4189932	0	unaffected	0	unaffected	unaffected
C18E3.6	chrI	4190143	4193130	0	unaffected	0	unaffected	unaffected
C18E3.5	chrI	4193240	4203307	0	unaffected	0	unaffected	unaffected
C18E3.4	chrI	4202418	4203042	0	unaffected	0	unaffected	unaffected
C18E3.3	chrI	4203459	4208521	0	unaffected	0	unaffected	unaffected
C18E3.8	chrI	4208512	4210342	0	unaffected	0	unaffected	unaffected
C18E3.2	chrI	4210978	4212669	0	unaffected	0	unaffected	unaffected
C18E3.1	chrI	4212743	4214263	0	unaffected	0	unaffected	unaffected
C18E3.9	chrI	4214294	4215754	0	unaffected	0	unaffected	unaffected
C43E11.6	chrI	4229577	4236044	0	unaffected	0	unaffected	unaffected
C43E11.5	chrI	4237034	4238739	0	unaffected	0	unaffected	unaffected
C43E11.7	chrI	4239087	4242730	0	unaffected	0	unaffected	unaffected
C43E11.8	chrI	4242819	4247581	0	unaffected	0	unaffected	unaffected
C43E11.4	chrI	4247754	4249384	0	unaffected	0	unaffected	unaffected
C43E11.11	chrI	4249482	4253170	0	unaffected	0	unaffected	unaffected
C43E11.12	chrI	4253242	4254140	0	unaffected	0	unaffected	unaffected
C43E11.3	chrI	4254380	4264692	0	unaffected	0	unaffected	unaffected
C43E11.2	chrI	4265107	4267187	0	unaffected	0	unaffected	unaffected
C43E11.9	chrI	4266928	4267972	0	unaffected	0	unaffected	unaffected
C43E11.10	chrI	4268069	4270288	0	unaffected	0	unaffected	unaffected
C43E11.1	chrI	4270646	4273336	0	unaffected	0	unaffected	unaffected
Y47D9A.3	chrI	4275888	4276948	0	unaffected	0	unaffected	unaffected
Y47D9A.5	chrI	4277684	4279623	0	unaffected	0	unaffected	unaffected
Y47D9A.2	chrI	4298259	4302246	0	unaffected	0	unaffected	unaffected
Y47D9A.1	chrI	4303930	4308245	0	unaffected	0	unaffected	unaffected
ZK973.8	chrI	4364906	4366996	0	unaffected	0	unaffected	unaffected
ZK973.3	chrI	4368087	4370505	0	unaffected	0	unaffected	unaffected
ZK973.9	chrI	4370442	4372137	0	unaffected	0	unaffected	unaffected
ZK973.10	chrI	4372254	4373121	0	unaffected	0	unaffected	unaffected
ZK973.2	chrI	4373656	4379352	0	unaffected	0	unaffected	unaffected
ZK973.11	chrI	4379320	4381899	0	unaffected	0	unaffected	unaffected
ZK973.1	chrI	4382565	4385226	0	unaffected	0	unaffected	unaffected
T21E12.4	chrI	4386787	4403645	0	unaffected	0	unaffected	unaffected
T21E12.3	chrI	4403312	4404586	0	unaffected	0	unaffected	unaffected
T21E12.2	chrI	4409689	4419306	0	unaffected	0	unaffected	unaffected
T21E12.5	chrI	4412227	4413222	0	unaffected	0	unaffected	unaffected
C11D9.1	chrI	4422032	4426177	0	unaffected	0	unaffected	unaffected
C41D11.3	chrI	4428456	4444105	0	unaffected	0	unaffected	unaffected
C41D11.4	chrI	4441646	4444342	0	unaffected	0	unaffected	unaffected
C41D11.2	chrI	4444719	4446594	0	unaffected	0	unaffected	unaffected
C41D11.8	chrI	4446582	4448464	0	unaffected	0	unaffected	unaffected
C41D11.9	chrI	4448577	4449777	0	unaffected	0	unaffected	unaffected
C41D11.5	chrI	4449834	4450926	0	unaffected	0	unaffected	unaffected
C41D11.7	chrI	4451197	4456806	0	unaffected	0	unaffected	unaffected
C41D11.1	chrI	4457383	4469464	0	unaffected	0	unaffected	unaffected
C41D11.6	chrI	4460146	4462973	0	unaffected	0	unaffected	unaffected
T01A4.1	chrI	4481238	4508362	0	unaffected	0	unaffected	unaffected
Y119C1B.4	chrI	4508600	4511127	0	unaffected	0	unaffected	unaffected
Y119C1B.5	chrI	4511440	4516084	0	unaffected	0	unaffected	unaffected
Y119C1B.6	chrI	4517391	4518466	0	unaffected	0	unaffected	unaffected
Y119C1B.8	chrI	4526378	4534801	0	unaffected	0	unaffected	unaffected
Y119C1B.9	chrI	4537447	4539726	0	unaffected	0	unaffected	unaffected
Y119C1B.3	chrI	4550478	4552784	0	unaffected	0	unaffected	unaffected
Y119C1B.11	chrI	4552851	4553122	0	unaffected	0	unaffected	unaffected
Y119C1B.1	chrI	4554150	4555204	0	unaffected	0	unaffected	unaffected
Y119C1B.10	chrI	4555350	4556812	0	unaffected	0	unaffected	unaffected
D1007.15	chrI	4557664	4563758	0	unaffected	0	unaffected	unaffected
D1007.14	chrI	4564041	4565987	0	unaffected	0	unaffected	unaffected
D1007.13	chrI	4566495	4568390	0	unaffected	0	unaffected	unaffected
D1007.1	chrI	4568962	4570028	0	unaffected	0	unaffected	unaffected
D1007.2	chrI	4571214	4572889	0	unaffected	0	unaffected	unaffected
D1007.3	chrI	4575442	4577201	0	unaffected	0	unaffected	unaffected
D1007.18	chrI	4578692	4579706	0	unaffected	0	unaffected	unaffected
D1007.4	chrI	4579964	4580604	0	unaffected	0	unaffected	unaffected
D1007.5	chrI	4580692	4583815	0	unaffected	0	unaffected	unaffected
D1007.6	chrI	4583873	4584746	0	unaffected	0	unaffected	unaffected
D1007.12	chrI	4584960	4586184	0	unaffected	0	unaffected	unaffected
D1007.10	chrI	4586271	4589393	0	unaffected	0	unaffected	unaffected
D1007.19	chrI	4589380	4589900	0	unaffected	0	unaffected	unaffected
D1007.7	chrI	4597890	4602667	0	unaffected	0	unaffected	unaffected
D1007.16	chrI	4603223	4604611	0	unaffected	0	unaffected	unaffected
D1007.8	chrI	4604403	4605386	0	unaffected	0	unaffected	unaffected
C44E4.5	chrI	4605655	4610203	0	unaffected	0	unaffected	unaffected
C44E4.8	chrI	4607282	4608210	0	unaffected	0	unaffected	unaffected
C44E4.1	chrI	4610145	4622973	0	unaffected	0	unaffected	unaffected
C44E4.7	chrI	4623460	4629468	0	unaffected	0	unaffected	unaffected
C44E4.2	chrI	4631391	4633348	0	unaffected	0	unaffected	unaffected
C44E4.4	chrI	4634103	4635631	0	unaffected	0	unaffected	unaffected
C44E4.6	chrI	4635715	4637329	0	unaffected	0	unaffected	unaffected
C44E4.3	chrI	4637438	4640883	0	unaffected	0	unaffected	unaffected
Y119C1A.1	chrI	4641263	4644278	0	unaffected	0	unaffected	unaffected
B0041.3	chrI	4644437	4645627	0	unaffected	0	unaffected	unaffected
B0041.4	chrI	4645636	4646966	0	unaffected	0	unaffected	unaffected
B0041.8	chrI	4647309	4648279	0	unaffected	0	unaffected	unaffected
B0041.5	chrI	4648269	4650771	0	unaffected	0	unaffected	unaffected
B0041.6	chrI	4652143	4652907	0	unaffected	0	unaffected	unaffected
B0041.2	chrI	4653471	4660152	0	unaffected	0	unaffected	unaffected
B0041.1	chrI	4664499	4665349	0	unaffected	0	unaffected	unaffected
B0041.7	chrI	4665744	4671739	0	unaffected	0	unaffected	unaffected
T04D1.3	chrI	4675135	4679410	0	unaffected	0	unaffected	unaffected
T04D1.2	chrI	4679671	4682756	0	unaffected	0	unaffected	unaffected
T04D1.4	chrI	4685868	4698576	0	unaffected	0	unaffected	unaffected
W09C3.4	chrI	4704622	4705875	0	unaffected	0	unaffected	unaffected
W09C3.3	chrI	4707264	4708763	0	unaffected	0	unaffected	unaffected
W09C3.6	chrI	4709317	4710709	0	unaffected	0	unaffected	unaffected
W09C3.2	chrI	4711428	4713447	0	unaffected	0	unaffected	unaffected
W09C3.7	chrI	4714320	4715486	0	unaffected	0	unaffected	unaffected
W09C3.8	chrI	4716059	4717442	0	unaffected	0	unaffected	unaffected
W09C3.1	chrI	4717623	4719576	0	unaffected	0	unaffected	unaffected
C10H11.7	chrI	4719789	4721099	0	unaffected	0	unaffected	unaffected
C10H11.6	chrI	4721178	4723961	0	unaffected	0	unaffected	unaffected
C10H11.5	chrI	4724065	4726780	0	unaffected	0	unaffected	unaffected
C10H11.4	chrI	4727301	4730367	0	unaffected	0	unaffected	unaffected
C10H11.3	chrI	4731604	4735280	0	unaffected	0	unaffected	unaffected
C10H11.8	chrI	4735756	4737848	0	unaffected	0	unaffected	unaffected
C10H11.9	chrI	4738170	4744322	0	unaffected	0	unaffected	unaffected
C10H11.1	chrI	4747627	4759602	0	unaffected	0	unaffected	unaffected
C10H11.10	chrI	4759817	4761324	0	unaffected	0	unaffected	unaffected
M04F3.3	chrI	4763241	4765206	0	unaffected	0	unaffected	unaffected
M04F3.2	chrI	4765754	4767885	0	unaffected	0	unaffected	unaffected
M04F3.1	chrI	4769694	4771490	0	unaffected	0	unaffected	unaffected
M04F3.4	chrI	4771486	4773048	0	unaffected	0	unaffected	unaffected
M04F3.5	chrI	4773818	4777718	0	unaffected	0	unaffected	unaffected
F54D7.4	chrI	4790411	4792502	0	unaffected	0	unaffected	unaffected
F54D7.3	chrI	4800098	4804172	0	unaffected	0	unaffected	unaffected
F54D7.2	chrI	4805605	4809675	0	unaffected	0	unaffected	unaffected
F57C9.6	chrI	4821930	4824915	0	unaffected	0	unaffected	unaffected
F57C9.7	chrI	4824909	4826634	0	unaffected	0	unaffected	unaffected
F57C9.5	chrI	4827072	4829797	0	unaffected	0	unaffected	unaffected
F57C9.4	chrI	4830133	4835872	0	unaffected	0	unaffected	unaffected
F57C9.3	chrI	4836187	4840172	0	unaffected	0	unaffected	unaffected
F57C9.2	chrI	4844908	4847337	0	unaffected	0	unaffected	unaffected
F57C9.1	chrI	4848420	4850718	0	unaffected	0	unaffected	unaffected
C01F4.2	chrI	4850682	4867826	0	unaffected	0	unaffected	unaffected
F25F8.1	chrI	4884901	4895496	0	unaffected	0	unaffected	unaffected
F25F8.2	chrI	4885187	4887966	0	unaffected	0	unaffected	unaffected
F21F3.4	chrI	4895987	4897542	0	unaffected	0	unaffected	unaffected
F21F3.5	chrI	4897367	4900978	0	unaffected	0	unaffected	unaffected
F21F3.3	chrI	4901974	4903174	0	unaffected	0	unaffected	unaffected
F21F3.2	chrI	4903437	4905139	0	unaffected	0	unaffected	unaffected
F21F3.1	chrI	4906823	4911832	0	unaffected	0	unaffected	unaffected
F21F3.6	chrI	4911803	4914050	0	unaffected	0	unaffected	unaffected
F21F3.7	chrI	4918392	4920867	0	unaffected	0	unaffected	unaffected
F28B3.8	chrI	4920680	4926236	0	unaffected	0	unaffected	unaffected
F28B3.5	chrI	4926648	4928743	0	unaffected	0	unaffected	unaffected
F28B3.9	chrI	4929099	4932148	0	unaffected	0	unaffected	unaffected
F28B3.4	chrI	4934037	4940510	0	unaffected	0	unaffected	unaffected
F28B3.1	chrI	4938243	4949335	0	unaffected	0	unaffected	unaffected
F28B3.10	chrI	4949327	4950413	0	unaffected	0	unaffected	unaffected
F28B3.6	chrI	4950581	4951484	0	unaffected	0	unaffected	unaffected
F28B3.7	chrI	4951334	4957670	0	unaffected	0	unaffected	unaffected
W03G9.8	chrI	4957775	4958567	0	unaffected	0	unaffected	unaffected
W03G9.3	chrI	4959398	4961525	0	unaffected	0	unaffected	unaffected
W03G9.2	chrI	4962452	4964384	0	unaffected	0	unaffected	unaffected
W03G9.4	chrI	4964667	4967330	0	unaffected	0	unaffected	unaffected
W03G9.5	chrI	4968007	4970246	0	unaffected	0	unaffected	unaffected
W03G9.9	chrI	4969923	4972244	0	unaffected	0	unaffected	unaffected
W03G9.1	chrI	4980306	4983987	0	unaffected	0	unaffected	unaffected
W03G9.10	chrI	4984138	4984751	0	unaffected	0	unaffected	unaffected
W03G9.6	chrI	4984760	4986740	0	unaffected	0	unaffected	unaffected
W03G9.7	chrI	4986954	4989455	0	unaffected	0	unaffected	unaffected
F54C1.5	chrI	4989555	4994708	0	unaffected	0	unaffected	unaffected
F54C1.3	chrI	4996839	5002351	0	unaffected	0	unaffected	unaffected
F54C1.2	chrI	5003351	5005163	0	unaffected	0	unaffected	unaffected
F54C1.8	chrI	5004959	5006029	0	unaffected	0	unaffected	unaffected
F54C1.9	chrI	5006745	5007991	0	unaffected	0	unaffected	unaffected
F54C1.1	chrI	5008772	5013374	0	unaffected	0	unaffected	unaffected
F54C1.6	chrI	5014350	5016260	0	unaffected	0	unaffected	unaffected
F54C1.7	chrI	5018769	5020166	0	unaffected	0	unaffected	unaffected
C46H11.6	chrI	5020876	5023166	0	unaffected	0	unaffected	unaffected
C46H11.4	chrI	5023888	5041157	0	unaffected	0	unaffected	unaffected
C46H11.3	chrI	5041491	5042055	0	unaffected	0	unaffected	unaffected
C46H11.7	chrI	5042194	5043456	0	unaffected	0	unaffected	unaffected
C46H11.8	chrI	5044203	5045723	0	unaffected	0	unaffected	unaffected
C46H11.9	chrI	5046398	5048021	0	unaffected	0	unaffected	unaffected
C46H11.2	chrI	5050051	5052527	0	unaffected	0	unaffected	unaffected
C46H11.10	chrI	5052530	5054886	0	unaffected	0	unaffected	unaffected
C46H11.11	chrI	5058253	5068832	0	unaffected	0	unaffected	unaffected
C30F8.2	chrI	5079912	5082284	0	unaffected	0	unaffected	unaffected
C30F8.4	chrI	5086312	5093809	0	unaffected	0	unaffected	unaffected
C30F8.3	chrI	5096603	5100497	0	unaffected	0	unaffected	unaffected
Y110A7A.20	chrI	5100768	5101677	0	unaffected	0	unaffected	unaffected
Y110A7A.12	chrI	5101654	5103406	0	unaffected	0	unaffected	unaffected
Y110A7A.13	chrI	5103582	5104919	0	unaffected	0	unaffected	unaffected
Y110A7A.14	chrI	5105109	5106207	0	unaffected	0	unaffected	unaffected
Y110A7A.11	chrI	5106223	5107628	0	unaffected	0	unaffected	unaffected
Y110A7A.10	chrI	5107843	5110167	0	unaffected	0	unaffected	unaffected
Y110A7A.21	chrI	5110077	5111157	0	unaffected	0	unaffected	unaffected
Y110A7A.15	chrI	5110915	5113755	0	unaffected	0	unaffected	unaffected
Y110A7A.16	chrI	5114121	5118855	0	unaffected	0	unaffected	unaffected
Y110A7A.9	chrI	5119218	5123987	0	unaffected	0	unaffected	unaffected
Y110A7A.17	chrI	5123928	5127205	0	unaffected	0	unaffected	unaffected
Y110A7A.8	chrI	5127830	5129907	0	unaffected	0	unaffected	unaffected
Y110A7A.7	chrI	5129723	5131074	0	unaffected	0	unaffected	unaffected
Y110A7A.6	chrI	5131290	5134108	0	unaffected	0	unaffected	unaffected
Y110A7A.5	chrI	5134741	5137977	0	unaffected	0	unaffected	unaffected
Y110A7A.4	chrI	5138261	5139450	0	unaffected	0	unaffected	unaffected
Y110A7A.3	chrI	5141677	5149229	0	unaffected	0	unaffected	unaffected
Y110A7A.2	chrI	5154531	5158470	0	unaffected	0	unaffected	unaffected
Y110A7A.18	chrI	5158510	5162207	0	unaffected	0	unaffected	unaffected
Y110A7A.19	chrI	5162603	5164889	0	unaffected	0	unaffected	unaffected
Y110A7A.1	chrI	5165093	5171317	0	unaffected	0	unaffected	unaffected
F56A3.4	chrI	5171287	5175525	0	unaffected	0	unaffected	unaffected
F56A3.3	chrI	5176468	5182804	0	unaffected	0	unaffected	unaffected
F56A3.2	chrI	5182738	5186242	0	unaffected	0	unaffected	unaffected
F56A3.5	chrI	5186945	5188619	0	unaffected	0	unaffected	unaffected
F56A3.1	chrI	5190150	5195249	0	unaffected	0	unaffected	unaffected
C32E12.2	chrI	5196080	5199939	0	unaffected	0	unaffected	unaffected
C32E12.3	chrI	5200260	5203432	0	unaffected	0	unaffected	unaffected
C32E12.5	chrI	5204538	5215221	0	unaffected	0	unaffected	unaffected
C32E12.4	chrI	5230554	5241917	0	unaffected	0	unaffected	unaffected
C32E12.1	chrI	5232578	5235279	0	unaffected	0	unaffected	unaffected
B0261.4	chrI	5244285	5245526	0	unaffected	0	unaffected	unaffected
B0261.2	chrI	5245742	5263429	0	unaffected	0	unaffected	unaffected
B0261.5	chrI	5249774	5250440	0	unaffected	0	unaffected	unaffected
B0261.6	chrI	5255449	5256926	0	unaffected	0	unaffected	unaffected
B0261.1	chrI	5263696	5268387	0	unaffected	0	unaffected	unaffected
B0261.9	chrI	5268421	5269466	0	unaffected	0	unaffected	unaffected
B0261.7	chrI	5269546	5270937	0	unaffected	0	unaffected	unaffected
B0261.8	chrI	5271279	5272040	0	unaffected	0	unaffected	unaffected
C01G8.1	chrI	5272848	5274325	0	unaffected	0	unaffected	unaffected
C01G8.2	chrI	5274698	5278711	0	unaffected	0	unaffected	unaffected
C01G8.3	chrI	5278806	5281519	0	unaffected	0	unaffected	unaffected
C01G8.4	chrI	5282085	5283944	0	unaffected	0	unaffected	unaffected
C01G8.5	chrI	5284059	5291608	0	unaffected	0	unaffected	unaffected
C01G8.6	chrI	5298757	5300334	0	unaffected	0	unaffected	unaffected
C01G8.9	chrI	5300953	5310917	0	unaffected	0	unaffected	unaffected
F48C1.4	chrI	5313346	5313726	0	unaffected	0	unaffected	unaffected
F48C1.3	chrI	5314335	5314609	0	unaffected	0	unaffected	unaffected
F48C1.5	chrI	5317493	5318129	0	unaffected	0	unaffected	unaffected
F48C1.6	chrI	5318227	5319299	0	unaffected	0	unaffected	unaffected
F48C1.2	chrI	5319733	5321126	0	unaffected	0	unaffected	unaffected
F48C1.1	chrI	5324513	5330215	0	unaffected	0	unaffected	unaffected
F48C1.7	chrI	5330578	5332178	0	unaffected	0	unaffected	unaffected
F48C1.9	chrI	5332249	5332784	0	unaffected	0	unaffected	unaffected
F48C1.11	chrI	5333781	5334934	0	unaffected	0	unaffected	unaffected
F48C1.8	chrI	5335194	5338649	0	unaffected	0	unaffected	unaffected
F55A12.6	chrI	5338924	5342052	0	unaffected	0	unaffected	unaffected
F55A12.7	chrI	5342180	5344727	0	unaffected	0	unaffected	unaffected
F55A12.5	chrI	5345930	5349648	0	unaffected	0	unaffected	unaffected
F55A12.8	chrI	5349645	5353770	0	unaffected	0	unaffected	unaffected
F55A12.4	chrI	5354162	5357031	0	unaffected	0	unaffected	unaffected
F55A12.3	chrI	5358522	5365173	0	unaffected	0	unaffected	unaffected
F55A12.2	chrI	5365197	5366876	0	unaffected	0	unaffected	unaffected
F55A12.10	chrI	5366946	5367838	0	unaffected	0	unaffected	unaffected
F55A12.1	chrI	5368480	5372646	0	unaffected	0	unaffected	unaffected
F55A12.9	chrI	5372853	5384511	0	unaffected	0	unaffected	unaffected
C24A11.2	chrI	5380162	5383032	0	unaffected	0	unaffected	unaffected
C24A11.1	chrI	5401810	5402896	0	unaffected	0	unaffected	unaffected
C24A11.8	chrI	5402897	5408462	0	unaffected	0	unaffected	unaffected
C24A11.9	chrI	5412844	5415632	0	unaffected	0	unaffected	unaffected
C30H7.2	chrI	5416651	5420734	0	unaffected	0	unaffected	unaffected
F27C1.6	chrI	5421291	5428460	0	unaffected	0	unaffected	unaffected
F27C1.4	chrI	5422785	5423331	0	unaffected	0	unaffected	unaffected
F27C1.3	chrI	5426359	5427319	0	unaffected	0	unaffected	unaffected
F27C1.7	chrI	5428545	5429911	0	unaffected	0	unaffected	unaffected
F27C1.2	chrI	5430164	5431489	0	unaffected	0	unaffected	unaffected
F27C1.8	chrI	5432160	5433059	0	unaffected	0	unaffected	unaffected
F27C1.10	chrI	5433909	5436785	0	unaffected	0	unaffected	unaffected
F27C1.1	chrI	5434809	5435789	0	unaffected	0	unaffected	unaffected
F27C1.11	chrI	5436800	5443029	0	unaffected	0	unaffected	unaffected
F27C1.13	chrI	5443880	5446858	0	unaffected	0	unaffected	unaffected
T05E8.1	chrI	5455732	5459526	0	unaffected	0	unaffected	unaffected
T05E8.2	chrI	5465943	5469630	0	unaffected	0	unaffected	unaffected
T05E8.3	chrI	5472323	5479441	0	unaffected	0	unaffected	unaffected
C09D4.4	chrI	5479543	5484646	0	unaffected	0	unaffected	unaffected
C09D4.5	chrI	5484769	5486357	0	unaffected	0	unaffected	unaffected
C09D4.6	chrI	5486489	5487153	0	unaffected	0	unaffected	unaffected
C09D4.3	chrI	5488342	5490629	0	unaffected	0	unaffected	unaffected
C09D4.2	chrI	5491476	5493534	0	unaffected	0	unaffected	unaffected
C09D4.1	chrI	5497780	5506518	0	unaffected	0	unaffected	unaffected
F59A3.3	chrI	5505392	5507026	0	unaffected	0	unaffected	unaffected
F59A3.4	chrI	5507118	5509175	0	unaffected	0	unaffected	unaffected
F59A3.2	chrI	5512050	5514560	0	unaffected	0	unaffected	unaffected
F59A3.12	chrI	5514660	5516028	0	unaffected	0	unaffected	unaffected
F59A3.13	chrI	5516104	5517383	0	unaffected	0	unaffected	unaffected
F59A3.7	chrI	5517712	5518566	0	unaffected	0	unaffected	unaffected
F59A3.1	chrI	5520389	5529762	0	unaffected	0	unaffected	unaffected
F59A3.8	chrI	5522398	5525343	0	unaffected	0	unaffected	unaffected
F59A3.9	chrI	5530685	5533713	0	unaffected	0	unaffected	unaffected
M01A10.2	chrI	5546151	5561657	0	unaffected	0	unaffected	unaffected
M01A10.3	chrI	5549139	5550508	0	unaffected	0	unaffected	unaffected
M01A10.1	chrI	5563832	5566268	0	unaffected	0	unaffected	unaffected
M01E11.4	chrI	5566347	5570084	0	unaffected	0	unaffected	unaffected
M01E11.5	chrI	5571786	5572976	0	unaffected	0	unaffected	unaffected
M01E11.3	chrI	5573209	5576750	0	unaffected	0	unaffected	unaffected
M01E11.6	chrI	5577057	5579302	0	unaffected	0	unaffected	unaffected
M01E11.2	chrI	5579666	5581882	0	unaffected	0	unaffected	unaffected
M01E11.1	chrI	5582007	5583441	0	unaffected	0	unaffected	unaffected
M01E11.7	chrI	5583407	5603377	0	unaffected	0	unaffected	unaffected
F46F11.3	chrI	5601806	5603630	0	unaffected	0	unaffected	unaffected
F46F11.11	chrI	5604877	5607520	0	unaffected	0	unaffected	unaffected
F46F11.4	chrI	5607824	5608843	0	unaffected	0	unaffected	unaffected
F46F11.5	chrI	5609312	5610279	0	unaffected	0	unaffected	unaffected
F46F11.9	chrI	5610376	5616405	0	unaffected	0	unaffected	unaffected
F46F11.6	chrI	5616597	5618554	0	unaffected	0	unaffected	unaffected
F46F11.2	chrI	5619569	5620671	0	unaffected	0	unaffected	unaffected
F46F11.7	chrI	5620779	5623053	0	unaffected	0	unaffected	unaffected
F46F11.10	chrI	5623026	5624478	0	unaffected	0	unaffected	unaffected
F46F11.8	chrI	5624604	5626291	0	unaffected	0	unaffected	unaffected
F46F11.1	chrI	5627819	5637620	0	unaffected	0	unaffected	unaffected
M01A12.4	chrI	5643269	5644060	0	unaffected	0	unaffected	unaffected
M01A12.1	chrI	5644749	5646373	0	unaffected	0	unaffected	unaffected
F55F8.2	chrI	5646341	5649659	0	unaffected	0	unaffected	unaffected
F55F8.3	chrI	5649758	5653642	0	unaffected	0	unaffected	unaffected
F55F8.4	chrI	5653804	5655862	0	unaffected	0	unaffected	unaffected
F55F8.5	chrI	5655951	5657926	0	unaffected	0	unaffected	unaffected
F55F8.6	chrI	5656932	5658715	0	unaffected	0	unaffected	unaffected
F55F8.7	chrI	5659499	5661215	0	unaffected	0	unaffected	unaffected
F55F8.1	chrI	5662145	5667147	0	unaffected	0	unaffected	unaffected
F55F8.8	chrI	5667071	5668840	0	unaffected	0	unaffected	unaffected
F55F8.9	chrI	5669949	5673357	0	unaffected	0	unaffected	unaffected
T19B4.5	chrI	5674338	5676241	0	unaffected	0	unaffected	unaffected
T19B4.4	chrI	5676829	5677710	0	unaffected	0	unaffected	unaffected
T19B4.3	chrI	5678633	5679866	0	unaffected	0	unaffected	unaffected
T19B4.7	chrI	5679846	5691508	0	unaffected	0	unaffected	unaffected
T19B4.2	chrI	5691840	5697505	0	unaffected	0	unaffected	unaffected
T19B4.1	chrI	5702158	5705556	0	unaffected	0	unaffected	unaffected
C04F1.3	chrI	5716678	5725359	0	unaffected	0	unaffected	unaffected
C04F1.1	chrI	5726375	5729310	0	unaffected	0	unaffected	unaffected
F56H1.3	chrI	5729795	5735845	0	unaffected	0	unaffected	unaffected
F56H1.2	chrI	5736237	5741625	0	unaffected	0	unaffected	unaffected
F56H1.4	chrI	5741867	5743576	0	unaffected	0	unaffected	unaffected
F56H1.6	chrI	5744186	5745620	0	unaffected	0	unaffected	unaffected
F56H1.1	chrI	5746727	5754284	0	unaffected	0	unaffected	unaffected
F56H1.5	chrI	5754315	5760796	0	unaffected	0	unaffected	unaffected
F56H1.7	chrI	5760898	5762438	0	unaffected	0	unaffected	unaffected
T22E7.2	chrI	5764032	5768193	0	unaffected	0	unaffected	unaffected
T22E7.1	chrI	5768965	5773629	0	unaffected	0	unaffected	unaffected
B0414.3	chrI	5774587	5775613	0	unaffected	0	unaffected	unaffected
B0414.2	chrI	5776156	5788612	0	unaffected	0	unaffected	unaffected
B0414.5	chrI	5788633	5791755	0	unaffected	0	unaffected	unaffected
B0414.6	chrI	5792326	5795124	0	unaffected	0	unaffected	unaffected
B0414.7	chrI	5795406	5801302	0	unaffected	0	unaffected	unaffected
B0414.1	chrI	5801874	5803269	0	unaffected	0	unaffected	unaffected
B0414.8	chrI	5803961	5807294	0	unaffected	0	unaffected	unaffected
C32F10.2	chrI	5807711	5815640	0	unaffected	0	unaffected	unaffected
C32F10.4	chrI	5808423	5810007	0	unaffected	0	unaffected	unaffected
C32F10.5	chrI	5815058	5818128	0	unaffected	0	unaffected	unaffected
C32F10.6	chrI	5818481	5821111	0	unaffected	0	unaffected	unaffected
C32F10.8	chrI	5822843	5826158	0	unaffected	0	unaffected	unaffected
C32F10.1	chrI	5829074	5834645	0	unaffected	0	unaffected	unaffected
F33D11.5	chrI	5834646	5837395	0	unaffected	0	unaffected	unaffected
F33D11.4	chrI	5840291	5841891	0	unaffected	0	unaffected	unaffected
F33D11.3	chrI	5842716	5844060	0	unaffected	0	unaffected	unaffected
F33D11.6	chrI	5844838	5846469	0	unaffected	0	unaffected	unaffected
F33D11.2	chrI	5847488	5849427	0	unaffected	0	unaffected	unaffected
F33D11.7	chrI	5850037	5851831	0	unaffected	0	unaffected	unaffected
F33D11.1	chrI	5852047	5852965	0	unaffected	0	unaffected	unaffected
F33D11.8	chrI	5854303	5855050	0	unaffected	0	unaffected	unaffected
F33D11.9	chrI	5857551	5862560	0	unaffected	0	unaffected	unaffected
F33D11.12	chrI	5862643	5866436	0	unaffected	0	unaffected	unaffected
F33D11.10	chrI	5866565	5868146	0	unaffected	0	unaffected	unaffected
F33D11.11	chrI	5868260	5870117	0	unaffected	0	unaffected	unaffected
C34G6.5	chrI	5872176	5874345	0	unaffected	0	unaffected	unaffected
C34G6.6	chrI	5874424	5878957	0	unaffected	0	unaffected	unaffected
C34G6.4	chrI	5886627	5895974	0	unaffected	0	unaffected	unaffected
C34G6.3	chrI	5896642	5897411	0	unaffected	0	unaffected	unaffected
C34G6.2	chrI	5898305	5902116	0	unaffected	0	unaffected	unaffected
C34G6.7	chrI	5902097	5904700	0	unaffected	0	unaffected	unaffected
C34G6.1	chrI	5906664	5917784	0	unaffected	0	unaffected	unaffected
B0207.5	chrI	5919788	5935418	0	unaffected	0	unaffected	unaffected
B0207.6	chrI	5935371	5936946	0	unaffected	0	unaffected	unaffected
B0207.4	chrI	5937478	5938887	0	unaffected	0	unaffected	unaffected
B0207.3	chrI	5942420	5945539	0	unaffected	0	unaffected	unaffected
B0207.7	chrI	5945758	5947344	0	unaffected	0	unaffected	unaffected
B0207.2	chrI	5955031	5956885	0	unaffected	0	unaffected	unaffected
B0207.9	chrI	5957461	5958361	0	unaffected	0	unaffected	unaffected
B0207.10	chrI	5959009	5959528	0	unaffected	0	unaffected	unaffected
B0207.11	chrI	5962953	5964128	0	unaffected	0	unaffected	unaffected
B0207.1	chrI	5965063	5967213	0	unaffected	0	unaffected	unaffected
B0207.12	chrI	5967252	5973322	0	unaffected	0	unaffected	unaffected
C06A5.6	chrI	5978691	5985873	0	unaffected	0	unaffected	unaffected
C06A5.4	chrI	5980792	5981590	0	unaffected	0	unaffected	unaffected
C06A5.5	chrI	5981817	5982454	0	unaffected	0	unaffected	unaffected
C06A5.10	chrI	5982520	5982971	0	unaffected	0	unaffected	unaffected
C06A5.3	chrI	5986493	5990843	0	unaffected	0	unaffected	unaffected
C06A5.11	chrI	5991072	5993213	0	unaffected	0	unaffected	unaffected
C06A5.7	chrI	5992664	6001101	0	unaffected	0	unaffected	unaffected
C06A5.12	chrI	6004654	6007597	0	unaffected	0	unaffected	unaffected
C06A5.2	chrI	6006334	6007326	0	unaffected	0	unaffected	unaffected
C06A5.8	chrI	6008079	6009608	0	unaffected	0	unaffected	unaffected
C06A5.9	chrI	6009782	6011525	0	unaffected	0	unaffected	unaffected
C06A5.1	chrI	6012059	6021985	0	unaffected	0	unaffected	unaffected
B0025.2	chrI	6022658	6026983	0	unaffected	0	unaffected	unaffected
B0025.5	chrI	6024152	6024957	0	unaffected	0	unaffected	unaffected
B0025.4	chrI	6027193	6028373	0	unaffected	0	unaffected	unaffected
B0025.1	chrI	6028487	6033460	0	unaffected	0	unaffected	unaffected
C27A12.4	chrI	6035453	6037789	0	unaffected	0	unaffected	unaffected
C27A12.3	chrI	6038407	6041271	0	unaffected	0	unaffected	unaffected
C27A12.2	chrI	6041671	6046178	0	unaffected	0	unaffected	unaffected
C27A12.5	chrI	6046833	6050464	0	unaffected	0	unaffected	unaffected
C27A12.6	chrI	6053598	6055825	0	unaffected	0	unaffected	unaffected
C27A12.7	chrI	6055948	6058426	0	unaffected	0	unaffected	unaffected
C27A12.8	chrI	6058450	6061035	0	unaffected	0	unaffected	unaffected
C27A12.9	chrI	6061661	6068034	0	unaffected	0	unaffected	unaffected
C27A12.10	chrI	6064089	6065305	0	unaffected	0	unaffected	unaffected
ZK484.3	chrI	6068527	6070126	0	unaffected	0	unaffected	unaffected
ZK484.4	chrI	6070680	6078849	0	unaffected	0	unaffected	unaffected
ZK484.2	chrI	6081799	6085964	0	unaffected	0	unaffected	unaffected
ZK484.5	chrI	6087370	6087766	0	unaffected	0	unaffected	unaffected
ZK484.6	chrI	6090076	6090897	0	unaffected	0	unaffected	unaffected
ZK484.1	chrI	6093300	6094422	0	unaffected	0	unaffected	unaffected
ZK484.7	chrI	6095056	6096591	0	unaffected	0	unaffected	unaffected
ZK484.8	chrI	6097497	6097839	0	unaffected	0	unaffected	unaffected
T27A3.4	chrI	6098978	6099728	0	unaffected	0	unaffected	unaffected
T27A3.5	chrI	6100264	6101683	0	unaffected	0	unaffected	unaffected
T27A3.3	chrI	6102033	6102467	0	unaffected	0	unaffected	unaffected
T27A3.6	chrI	6105863	6107717	0	unaffected	0	unaffected	unaffected
T27A3.7	chrI	6107816	6109657	0	unaffected	0	unaffected	unaffected
T27A3.2	chrI	6110135	6114539	0	unaffected	0	unaffected	unaffected
T27A3.1	chrI	6122591	6126856	0	unaffected	0	unaffected	unaffected
F56F4.5	chrI	6133286	6137982	0	unaffected	0	unaffected	unaffected
F56F4.6	chrI	6139217	6140446	0	unaffected	0	unaffected	unaffected
F56F4.3	chrI	6141470	6144388	0	unaffected	0	unaffected	unaffected
F56F4.1	chrI	6148101	6149143	0	unaffected	0	unaffected	unaffected
F56F4.8	chrI	6149237	6150493	0	unaffected	0	unaffected	unaffected
T09B4.5	chrI	6154076	6157423	0	unaffected	0	unaffected	unaffected
T09B4.6	chrI	6156841	6159170	0	unaffected	0	unaffected	unaffected
T09B4.7	chrI	6160081	6161667	0	unaffected	0	unaffected	unaffected
T09B4.8	chrI	6164716	6166541	0	unaffected	0	unaffected	unaffected
T09B4.4	chrI	6167949	6168645	0	unaffected	0	unaffected	unaffected
T09B4.3	chrI	6176187	6177792	0	unaffected	0	unaffected	unaffected
T09B4.9	chrI	6177984	6180842	0	unaffected	0	unaffected	unaffected
T09B4.10	chrI	6181315	6183882	0	unaffected	0	unaffected	unaffected
T09B4.2	chrI	6184073	6185373	0	unaffected	0	unaffected	unaffected
T09B4.1	chrI	6185461	6188152	0	unaffected	0	unaffected	unaffected
T05E7.3	chrI	6188160	6192618	0	unaffected	0	unaffected	unaffected
T05E7.4	chrI	6192288	6194901	0	unaffected	0	unaffected	unaffected
T05E7.2	chrI	6199142	6200195	0	unaffected	0	unaffected	unaffected
T05E7.5	chrI	6200796	6202348	0	unaffected	0	unaffected	unaffected
T05E7.1	chrI	6203898	6206931	0	unaffected	0	unaffected	unaffected
T08B2.7	chrI	6206955	6211157	0	unaffected	0	unaffected	unaffected
T08B2.8	chrI	6211268	6211889	0	unaffected	0	unaffected	unaffected
T08B2.9	chrI	6211987	6214588	0	unaffected	0	unaffected	unaffected
T08B2.5	chrI	6214803	6219913	0	unaffected	0	unaffected	unaffected
T08B2.10	chrI	6220090	6220768	0	unaffected	0	unaffected	unaffected
[truncated: 17,507 more rows]

## Sheet: vc100
gene_ID	chr	start	stop	CNV_overlap	CNV_type	CNV_overlap_10kb	CNV_type.10kb	CNV_size
[truncated: 18,497 more rows]

[truncated: 5 more sheets: OP37, OP51, sp1981, sp219, ty1909]
