# Supplementary material for: Increased gene dosage and mRNA expression from chromosomal duplications in C. elegans
Source: bioRxiv preprint, doi:10.1101/2022.03.22.485368, version 2 (2022-05-13)
Supplement: Supplemental File 4 [file 485368_file06.xlsx]

## Sheet: README
Column_name	Column Description
gene	Gene name from C.elegans reference WS220
baseMean	mean of normalized counts for all samples, normalizing for sequence depth. Does not take gene length into consideration as base mean is used to estimate the fitted dispersion of a gene.
log2FoldChange	log fold change ratio of mutant/wildtype of the mean of normalized counts
lfcSE	standard error value of fold change
stat	Wald statistic is the LFC divided by its standard error. This Wald statistic is used to calculate p-values (it is compared to a standard normal distribution) . So it's the ratio of LFC and SE which determines significance
pvalue	Wald test p-value for mutant vs wildtype
padj	padj value corresponds to p-value adjusted for multiple testing using Benjamini-Hochberg method
FPKM<1 in N2	genes with FPKM<1 in any of the replicates in the N2 data has been flagged. This is done separately for each developmental stage emb, L2/L3, YA

## Sheet: FPKM
Gene Information				AKM224_OP37_rep2	AKM225_OP37_rep3	AKM56_OP37_rep1	MK09_N2_L2_rep5	MK126_BC4289_YA_rep1	MK127_BC4289_YA_rep2	MK128_BC4289_YA_rep3	MK129_SP117_YA_rep1	MK130_SP117_YA_rep2	MK131_SP117_YA_rep3	MK135MK220MK198_N2_L2_rep2	MK136MK200_N2_L2_rep3	MK137MK202_N2_L2_rep4	MK18MK26_N2_L2_rep1	MK31_N2_L2_rep6	MK41_N2_emb_rep1	MK42_N_emb_rep2	MK45_N2_L2_rep7	MK52MK80_N2_YA_rep1	K53MK81_N2_YA_rep2	MK54MK82_N2_YA_rep3	MK55MK84_N2_YA_rep5	MK56MK85_N2_YA_rep4	MK57MK86MK93_N2_YA_rep6	MK62MK74_N2_emb_rep3	MK63MK75_N2_emb_rep4	MK83_N2_YA_rep7	MK95_N2_YA_rep8	SEA131_SP117_L2_rep1	SEA132_SP117_emb_rep2	SEA134_TY1916_emb_rep3	SEA143_SP117_L2_rep2	SEA144_SP117_L2_rep3	SEA145_BC4289_L2_rep1	SEA146_BC4289_L2_rep2	SEA36_N2_emb_rep5	SEA37_N2_emb_rep6	SEA38_N2_emb_rep7	SEA48_N2_emb_rep8	SEA61_N2_emb_rep9	SEA71_SP117_emb_rep1	SEA80_TY1916_L2_rep1	SEA81_SP117_L2_rep4	SEA82_TY1916_emb_rep1	SEA89SEA110_TY1916_emb_rep2
chr	start	stop	tracking_id	FPKM	FPKM	FPKM	FPKM	FPKM	FPKM	FPKM	FPKM	FPKM	FPKM	FPKM	FPKM	FPKM	FPKM	FPKM	FPKM	FPKM	FPKM	FPKM	FPKM	FPKM	FPKM	FPKM	FPKM	FPKM	FPKM	FPKM	FPKM	FPKM	FPKM	FPKM	FPKM	FPKM	FPKM	FPKM	FPKM	FPKM	FPKM	FPKM	FPKM	FPKM	FPKM	FPKM	FPKM	FPKM
chrII	1866	4663	2L52.1	5.3	3.1	5.3	3.1	2.2	2.7	1.7	3	2.7	3.7	3.5	3	1.3	3.3	2.8	23.8	23.6	2.3	2.2	1.9	2.7	1.9	1.6	1.6	21.5	19.8	2.5	2.8	4.4	32.4	30.1	3.2	2.2	2.4	2.1	24.8	20.4	33.9	32.6	30.4	35.6	3.6	3.7	32.1	31.5
chrII	15268135	15273238	2RSSE.1	28.2	25	20.5	24.6	11.4	13.9	13.1	14.2	11.7	13.7	22	25.9	20.9	19.2	16.3	62.6	58.5	20	9.6	12.6	10.3	20.3	14.4	16.5	63.8	57.6	11	19.7	21	122.3	117.9	30	24.2	28.1	21.4	171.7	171.5	116.6	147.4	121.8	137.8	46.6	31.6	183.2	150.5
chrII	15274314	15275613	2RSSE.2	8.5	6.1	4.8	14.3	5.1	5.5	5.1	5.2	3.4	5.3	8.1	10.7	8.7	8.2	10.6	37.6	46.9	15.5	5.7	4.4	5.7	7.2	5.4	4.4	33.8	35.6	6	4.4	10.7	76.6	92.3	17.7	13.1	16.9	12.1	140	128.4	93.2	99.3	75.3	92.1	35.1	13.9	143.4	98.4
chrIII	13777588	13781032	3R5.1	4.4	3.3	5	3.9	19.9	17.4	17.4	10.8	9.5	12.3	5.2	4.7	4.3	3.1	2.9	6.2	7.2	2.5	7	5.6	8.2	6.7	7.2	5.8	4.8	4.9	7.7	8.3	3.1	8.1	4.5	3.6	2.7	8	8.1	6	4.9	4.8	4.7	5.5	6	1.3	3.6	4.9	4.4
chrIV	17486945	17490461	4R79.1	11.2	3.1	6.9	12.3	0.4	0	0.4	0.5	0.3	1	8.5	9.1	1.2	4.5	1.3	0	0	10.8	0.1	0.5	0.2	0.1	0.1	0.1	0	0	0.2	0.1	7.4	1.1	3.1	8.6	7.5	6.2	3.6	3.7	7.5	9.4	10.3	1	3.7	13.6	4.3	6.2	4.4
chrIV	17480359	17483294	4R79.2	2	1.4	2.7	1.6	0.6	0.3	0.6	0.8	0.4	0.7	1.5	1.6	0.9	2	1.2	0	0	0.9	0.4	0.2	0.6	4.5	4	3.3	0	0	0.2	6.3	2	0.3	1	1.5	1.8	0.6	1.7	1.1	1.9	1.4	3.2	0.1	0.8	2.1	1.9	2	0.9
chrX	17714379	17714756	6R55.2	1.3	0	0.6	0.9	0.5	0.5	1.2	0.7	0.5	0.5	3.5	0	2.4	0.9	1.6	0	0	2	1	1.9	0	1.6	0.6	1.2	0	0	0	1.5	0	0.5	0	0	2.1	0.7	3	0.9	2.1	0.6	0	1.2	0	1.3	0.6	0.5	2.7
chrV	10368532	10369845	AC3.1	0.4	0	0.1	0.2	0.1	0	0	0.2	0	0.1	0.2	0.3	0	0.1	0.1	0.5	0.9	0	0	0.1	0	0.4	0.3	0.3	1.1	0.9	0	0.7	0.1	0.3	0.3	0	0.1	0.2	0.3	0.1	0.3	0.2	0	0.7	0.3	0	0	0.2	0.3
chrV	10384133	10385688	AC3.10	0	0.2	0.2	0	1.3	0.2	0.9	0.8	0.7	1	0	0	0.1	0.2	0.1	0	0	0	0.5	0.9	0.4	16.5	15	15.7	0	0	0.3	17.3	0.2	0.1	0.8	0.3	0	0.1	0.1	0.1	0.3	0.1	0.4	0.1	0	0.5	0.3	0.5	0.2
chrV	10372117	10374238	AC3.2	15.5	17.3	18.4	14.3	16.6	7.7	15	15.7	10.4	15.7	12.9	14.2	10.4	14.9	11.9	15.9	19.2	7.5	8	10.7	9	21.8	20.6	16.1	16.8	18.2	8.2	30.8	15.2	14.3	11	12.4	18.1	12	15.3	7.3	5.7	7.9	6.8	12.2	11.3	12.2	13.8	9.5	9.5
chrV	10380315	10381800	AC3.3	30.8	1.4	14.4	6.3	21.3	4.6	32.8	24.6	10	16.6	9.7	6.4	16.3	9.1	4.9	0.1	0	13.8	7.7	60.1	6.8	1.2	1.6	0.1	0	0	6.2	0.1	5.3	0.7	1.4	11.8	13.1	20.2	10.6	0.5	2.6	3.3	6.9	0.2	2.7	14.7	18.3	3.4	2.1
chrV	10382418	10383953	AC3.4	26.4	1.1	12.7	4.3	16.6	3.2	26	18.4	7.3	12	7.2	5	13.1	6.8	5	0.1	0	10.1	6.3	47.8	5	0.8	1.5	0.2	0	0	4.1	0.1	3.9	0.5	0.8	8	9.5	15.8	7.3	0.3	1.5	2	5.4	0.2	1.4	8.4	11.2	2.1	1.2
chrV	10388446	10393480	AC3.5	53.7	59.1	84.2	53.2	28.6	19.1	24.5	18.5	14.7	21.4	52.9	51.5	49.6	62.8	76.6	0.1	0.1	26.7	19.7	22.8	20.5	19.8	41.7	35.8	0.1	0	19	38.4	51.7	0.2	4.4	42.6	42.3	53.2	63.4	0.5	0.4	0.7	1.7	0.2	0.6	38.4	44	4.2	2.9
chrV	10393507	10395209	AC3.6	0.5	0	0.2	0.2	0.1	0.1	0.1	0	0	0.1	0.2	0.1	0.1	0.3	0.2	0	0.3	0.1	0.1	0.1	0.1	0.5	0.3	0.3	0.1	0.3	0.2	0.2	0	0.1	0.2	0.4	0.1	0.1	0.3	0	0.4	0.2	0.3	0.3	0.2	0.3	0.2	0.3	0.3
chrV	10395653	10397794	AC3.7	9.2	1.6	9.5	1.7	0.8	0.4	0.3	0.7	1	1.1	4.3	4	2.1	1.3	1.7	3.6	3.8	1.7	0.7	1.3	1.3	3.1	2.3	1.7	3.3	4	0.9	1.5	2.5	3.1	2.1	2.1	3	0.7	0.7	1.7	1	2.1	1.1	2	2.5	1.9	2.4	1.6	1.8
chrV	10398786	10401290	AC3.8	7.9	9	10.8	3.3	2	1.1	1.9	1.6	1.5	2.2	7.4	5	10.8	7.3	6.8	0	0	1.9	1	1.6	1.6	4.2	2.7	5.5	0	0	1.5	4.3	7.1	0.2	1	4.3	5.1	4.2	5.6	0.6	0.5	1.5	1.6	0.6	0.7	8.1	16	1.4	0.9
chrIV	5112920	5122011	AC7.1	0.5	1.1	0.7	0.3	0.7	0.9	0.8	0.7	0.3	1.2	0.7	0.3	0.7	0.3	0.4	0	0	0	0.3	0.6	0.5	0.5	0.2	0.4	0	0	0.3	1.1	0	0.3	0.7	1.5	0.7	0.4	0.4	0.4	0.3	0.5	1.6	0.2	0.2	1.6	0.5	0.5	0.5
chrIV	5126997	5145802	AC7.2	64.1	55	77.7	71.6	23.4	15	24.2	20.7	18.5	20.5	66.8	67.6	68.1	83.5	66.9	8.7	10.2	46.5	12.4	16	13.1	20.7	19.3	16.7	7.8	8.4	12.4	25.8	60.8	24.3	37	59.2	53	55.7	52	48.1	50.4	51.4	61.7	30.4	38	54.3	51	48.1	32.7
chrIV	5111677	5112867	AC7.3	0	0	0	0	1.7	0.6	1.2	0.7	0.5	0.6	0	0	0	0.1	0.1	0	0	0	0.2	1.9	0.8	23.9	19.6	26.4	0.1	0.2	0.1	20.7	0.4	0	0	0	0.2	0	0	0.5	0.2	0	0	0	0.1	0	0	0	0
chrX	237495	239177	AC8.10	2.7	2.3	4.6	2.7	1.2	1.4	1.2	1.4	1.3	1.5	2.9	3.2	3	2.7	2.8	0.7	1.7	2.8	1.2	1.6	1.7	2.7	2.1	2.4	1	1	1.3	3.6	2.2	1.9	2.9	4.1	2	2.6	2.1	4.5	3.5	3.9	4.2	4.7	2.3	3.6	3.4	4.9	3.3
chrX	236066	236810	AC8.11	5.3	4.6	6.7	3.8	2.4	2.1	2.7	1.4	2.6	1.8	4.3	4.7	4.4	5.2	3.5	2.5	2	3.6	2.7	2.9	2.4	5.4	3.1	3.3	1.9	2.9	2.6	6.1	3	3.3	4.9	6.2	2.8	3.3	3.8	6.3	5.1	7.2	5	9	3.3	7.2	4.1	7.1	5
chrX	239848	240779	AC8.12	4.8	3.8	4.4	2.5	2.4	2.4	1.7	2.6	1.9	2.2	2.7	3	2.9	2.9	2.6	1.9	1.9	2.3	2.7	2.5	2.4	2.5	2	2.2	2	2.4	2	3.3	3.8	3	4	3	4.1	3.4	3.2	5.3	3.4	4.2	4.4	13.1	4.4	4.1	5.6	7.5	8
chrX	228079	229761	AC8.3	2.7	2.3	4.6	2.7	1.2	1.4	1.2	1.4	1.3	1.5	2.9	3.2	3	2.7	3.3	0.7	1.7	2.8	1.2	1.6	1.7	2.7	2.1	2.4	1	1	1.3	3.6	2.2	1.9	2.9	4.1	2	2.6	2.1	4.5	3.5	3.9	4.2	4.7	2.3	3.6	3.4	4.9	3.3
chrX	226650	227394	AC8.4	5.3	4.6	7	3.8	2.4	2.1	2.7	1.4	2.6	1.8	4.3	4.7	4.4	5.3	4.3	2.5	2	3.6	2.7	2.9	2.4	5.4	3.1	3.2	1.9	2.9	2.6	6.1	3	3.3	4.9	6.2	2.8	3.3	3.8	6.4	5.1	7.3	5.3	9	3.3	7.2	4.1	7.1	5
chrX	230432	231363	AC8.7	4.8	3.8	4.5	2.5	2.4	2.4	1.7	2.6	1.9	2.2	2.9	3	2.9	2.9	3.1	1.9	1.9	2.3	2.7	2.5	2.4	2.5	2	2.2	2	2.4	2	3.3	3.8	3	4	3	4.1	3.4	3.2	5.3	3.4	4.2	4.4	13.2	4.4	4.1	5.6	7.5	8
chrV	14146493	14148769	AH10.1	0.1	0	0	0	7	2.2	8.1	4.7	3.1	4	0.2	0	0	0.1	0	0.8	0.3	0	3.4	8.2	3.9	134.1	105.7	112	1.1	0.6	4.1	112.9	0	0.1	0.2	0	0.1	0	0	0.4	0.1	0	0	0.1	0.1	0.1	0	0.2	0.5
chrV	14156815	14157607	AH10.2	0	0	0	0	0.2	0	0.1	0.2	0.1	0.1	0.2	0	0	0	0	12.9	8.7	0	0	0.1	0	0	0	0	10.5	8.7	0	0	0	4.1	1.9	0	0.2	0	0.1	3.2	1.7	1	2.1	2.8	1.8	0	0	0.9	2.2
chrV	14144014	14145396	AH10.3	2	4.9	3.3	2.4	2.3	1	1.8	2.2	0.9	2	2.1	4.3	4.5	6.3	5.3	0.6	0	3	1.1	2.5	1.9	0.4	4.1	2.5	0.3	0.3	1.9	4.9	4.6	2.6	9	1.6	3.9	4.3	3.6	10	13.1	20.3	21.8	7	10.1	8	3.6	17.6	10.1
chrV	14137332	14137845	AH10.4	1	0.5	0	1	1	0.5	0	0.8	0.3	0.4	1	0.3	1	0.5	1.1	0	0	0.2	0.8	0.5	1.2	2.8	0	1	0.2	0	1.2	0.4	0	0	2.2	0	1	0	0	0	0	0	2	0.4	0	0	0.5	1.6	1.8
chrII	9512430	9516877	AH6.1	0	0	0	0	0	0	0	0	0	0	0	0	0	0.1	0	0	0	0	0	0	0	0.2	0.1	0.1	0	0	0	0.2	0	0	0	0	0	0	0	0	0	0	0	0	0	0	0	0	0
chrII	9548345	9549639	AH6.10	0.5	0.8	1	0	0	0	0	0	0.1	0	0	0.2	0.4	0.3	0.2	0	0	0.1	0	0.1	0	0	0	0	0	0	0	0.1	0.2	0	0.1	0	0.2	0.1	0.1	0	0.3	0.1	0.2	0	0	2.2	0.1	0	0.3
chrII	9544625	9546148	AH6.11	0.2	0.1	0.1	0	0	0	0	0	0	0	0	0.1	0	0	0.1	0	0	0	0	0	0	0	0	0	0	0	0	0	0	0	0	0	0	0	0.2	0	0	0.1	0	0	0	0	0.1	0	0.1
chrII	9537668	9539025	AH6.12	0	0	0	0	0	0	0	0	0	0	0	0	0	0	0	0	0	0	0	0	0	0.1	0	0	0	0	0	0	0	0	0	0	0	0	0	0	0	0	0	0	0	0	0	0	0
chrII	9532238	9533914	AH6.14	0	0	0	0	0	0	0	0	0	0	0	0	0	0	0	0	0	0	0	0	0	0	0.1	0	0.1	0	0	0	0	0	0	0	0	0	0	0	0	0	0	0	0	0	0	0	0
chrII	9517508	9518837	AH6.2	0	0	0	0	4.1	1.1	4.7	1.5	1.4	1.5	0.1	0.1	0	0	0.1	0.5	0	0	2.2	3.6	1.9	35.8	33.4	36.2	0.1	0	1.9	43	0	0.1	0	0	0	0.1	0	0	0	0	0	0	0.1	0.1	0	0	0
chrII	9519036	9520151	AH6.3	0.2	0	0	0	8.8	2.1	8.7	5.8	3.3	5.2	0	0.1	0	0	0	0	0	0	4.1	11.4	5.7	133.2	122.6	115	0.3	0.1	4.6	99.1	0	0.2	0.3	0	0	0	0	0.4	0.2	0	0	0	0.1	0.2	0	0.2	0.1
chrII	9520140	9521611	AH6.4	0	0.1	0	0	0	0	0	0	0	0	0	0.2	0	0	0.1	0	0	0	0	0	0	0	0	0	0.2	0.2	0	0.1	0	0.1	0.1	0	0	0	0	0.1	0.1	0.1	0.1	0.1	0	0	0	0.1	0.1
chrII	9524112	9526307	AH6.5	2.8	0.8	1.5	2.3	183.5	214.8	168.3	210.2	203.3	227.1	3.4	3.7	2	1.4	1	408	323.5	0.8	179.8	160.1	194.8	20.4	29	25.3	420.9	351.1	185.6	22.3	1.8	214.7	141.5	1.9	2.6	2.2	2.1	119.9	64.8	61.2	87.1	131	152.8	0.5	1.7	67	104.9
chrII	9528719	9529802	AH6.6	0	0	0	0	0	0	0	0	0	0	0	0	0	0	0	0	0	0	0	0	0	0	0	0	0	0	0	0	0	0	0	0	0	0	0	0	0	0	0	0	0	0	0	0	0
chrII	9539210	9540763	AH6.7	0	0.1	0.1	0	0.1	0.2	0.1	0	0	0.1	0	0.1	0.1	0.2	0	0	0	0	0.1	0	0	0	0.1	0	0	0	0	0	0	0	0	0	0	0	0	0	0.1	0	0	0	0	0	0	0.1	0
chrII	9541540	9542825	AH6.8	0	0	0.1	0	0	0	0	0	0.1	0	0	0.1	0	0.1	0	0	0	0.1	0	0	0	0	0.1	0	0	0	0	0	0	0	0	0	0.1	0.6	0.2	0	0	0	0	0	0	0.3	0	0	0
chrX	2243225	2247000	AH9.1	0.6	0.6	1	0.8	0.4	0.3	0.1	0.2	0.3	0.4	0.5	0.6	0.6	1.1	0.8	0.6	1.3	0.2	0.4	0.3	0.5	0.5	0.2	0.3	0.7	0.9	0.2	0.8	0.8	0.7	1.2	0.4	1.1	0.5	0.5	0.5	0.6	1.1	1.2	0.4	0.6	0.6	1.4	1.2	0.8
chrX	2255839	2258073	AH9.2	2.4	1.5	2.5	0.5	10.6	12	9.9	11.3	11.1	11.1	1.2	1.7	3.1	0.9	1	28.5	22.4	0.7	9.4	6.4	9.4	3.2	1.9	2.2	27.1	24.9	6.5	2.9	2.1	16.1	16.5	2.5	1.6	1.3	1.8	8.3	5	5.3	5.7	9.8	9.1	0.9	1.5	8.6	8.7
chrX	2259143	2260518	AH9.3	13.3	7.5	10.3	9	7.1	8.1	6.6	9.8	7	10.9	8.8	7.2	6	5.9	6	73.6	77.2	7.2	4.9	7.1	6.2	5.5	5.2	3.2	65.6	75.3	5.6	6.5	6.1	71.4	65.7	7	5.5	7.8	8.2	53.9	49.2	66.7	53.3	67.6	80.9	6.2	5.9	48.9	57.2
chrX	2271016	2274329	AH9.4	0.7	0.4	0.8	1	0.3	0	0	0.1	0.1	0.1	0.4	0.4	0.2	0.6	0.6	0.3	0.2	0.3	0.1	0	0	0.3	0.3	0	0.1	0.1	0	0.5	1.3	0.1	0.6	0.5	0.3	1	0.9	0.4	0.8	0.6	0.9	0.1	0.3	0.3	0.7	0.5	0.5
chrX	2263167	2267464	AH9.6	5.1	8.8	4.8	7.1	0.6	0.2	0.5	1.1	0.5	0.6	4.2	3	4.7	8.8	4.8	0	0	4.6	0.4	0.6	0.4	2.6	1.6	1.8	0	0	0.5	4.3	5.3	1.6	4.9	3.7	5.1	8.2	7.2	5.5	5.9	6.3	12.3	1	3.4	9.2	6.9	5.8	3
chrX	2243144	2244459	AH9.7	0.2	0.5	0.3	0.7	0.2	0.1	0.2	0.3	0.1	0.3	0.8	0.7	0.2	0.6	0.3	1.6	2.5	0.4	0.1	0	0.2	1.1	0.4	0.6	1.3	1.5	0.1	0.7	0.2	1.8	5.1	0	0.6	1.1	0.9	1.4	1.7	0.7	2.3	1.5	2.5	0.4	0.1	2.7	3.1
chrIV	12129481	12135073	B0001.1	36.4	35.9	48.4	34.1	92.5	93	83.5	61	57.1	64.9	32.1	29.9	32.9	51.1	43.3	29.6	32.3	25.6	50.1	45.9	48.8	17.1	21.3	20.1	29.1	29.3	41.8	31.6	59.4	48.1	80.6	57.5	45.6	59.4	77.8	78.1	87.6	99.4	87.5	48.1	75.7	45.9	46.4	91.5	71.4
chrIV	12146458	12150953	B0001.2	7.8	3.1	6.2	3.8	29.6	29.6	25.9	27.7	24.7	29.6	7.1	6.7	4.4	3.6	3.1	10.9	8.2	2.3	20.6	14.3	19.4	16.5	14.3	14.3	12.3	10.2	18.9	17.1	3.9	9.1	11.1	4.3	5.3	3.9	3.9	5.8	4.3	5.7	5.7	5.2	7.8	1.9	3.4	5.6	5.6
chrIV	12143408	12145709	B0001.3	13	10.6	16.1	12.2	31.8	31.4	30.5	24.5	26.2	27.6	12.3	14.8	12.9	13.4	13	21.2	20.6	11.7	20.5	19.6	19.8	13.1	12.7	14	19.8	18.9	19.3	16.4	13.6	25	23.8	12	12.4	18	16.7	21.5	20.8	25.9	26.1	28.3	25.2	12.6	15.8	24.1	19.1
chrIV	12135057	12137325	B0001.4	38.8	15.4	55.7	23.4	80.4	77.5	70.9	49.4	53.9	54.7	28.5	27.3	26.2	24.6	23.9	51.5	48.2	18.1	48.7	47.1	50.7	45.2	38.9	40.1	48.1	48	46.1	49.8	25.6	40.7	41.4	25.4	21.7	30.5	31.7	36.5	34.3	33.3	31.3	41.8	34.3	21.1	29.5	32.7	31.9
chrIV	12141137	12143309	B0001.5	11.3	9.2	12.1	10.2	24.5	23.8	25.1	20.2	17	17.5	12.6	13.7	12.4	10.2	9.5	25.8	28.3	8.2	15.6	15.7	17.5	15.6	12.5	14.6	27.3	30.5	14.7	19.9	12.5	36.4	24.5	10.9	11.6	13.4	13.3	28.4	25.7	31.1	26.6	36.9	34.2	11.4	14.5	25.4	29
chrIV	12156815	12164252	B0001.6	54.6	54.4	57.1	53.1	48.3	34.5	43.9	29.9	27.2	31.2	44.6	51.5	42.3	72.7	64.5	72.6	67.9	44	22.2	28.5	22.9	44.7	39.3	38.2	68.1	73.5	22.4	61.6	53.9	111.8	145.6	52.6	47.1	52.8	58.1	131.2	111.6	158.1	137.9	146.4	147.7	68.9	53.4	159.7	155
chrIV	12150035	12154220	B0001.7	3.7	1.6	2.9	1.8	21.1	20.1	19.2	21.3	21.2	21.8	4.2	4.5	3.5	1.9	1.9	48.3	42.6	1	15	13.7	15.2	6.4	5.7	5.5	46.7	40.4	13.6	8.8	2.5	27.1	16.7	2.7	1.8	2.7	2.4	12.5	6.3	8.4	9.5	18.3	17.6	0.6	1.9	8.3	13.8
chrIV	12138822	12141036	B0001.8	6.3	6.2	7.8	7.2	26.4	26.9	26.1	24.6	20.8	25	9.4	10	8	7.9	6.9	62.7	49.5	5.8	16.2	12.7	17.2	11.6	10.1	10	56	50.5	16	12.3	7.4	34.4	20.1	6.2	6.8	9.3	7.9	30.5	18.1	23.3	21.7	28.4	28.6	7.3	9.5	16.7	21.2
chrI	12759575	12764950	B0019.1	23.3	21.4	27.9	9.7	10.7	6.5	11.3	10.1	9.4	11.3	12	11.1	18.7	22.9	18	0.8	1.3	11.3	6.1	16.1	7.4	10.3	14.9	13.8	0.5	0.5	6.6	14.1	13.3	4.7	9.5	13.7	16.8	14.1	15.8	7.3	8.8	10.4	10.7	9	7.7	15.3	26.7	10	8
chrI	12773646	12782247	B0019.2	6	5.9	8.3	6	22.6	21.1	18.2	21.8	22	23.3	9	8.2	7.7	6.3	5.3	22.4	25.2	3.7	16.1	15.2	17.7	7.2	6	5.4	21.1	21.8	16.5	9.8	5.2	22.5	21	8.3	5.9	5.6	5.5	12.9	9.2	12.5	13.8	18.5	21.1	4.7	6.5	14.1	14.5
chrV	10291670	10292843	B0024.1	41.9	25.5	147	140	164	71.3	182.3	46	156.8	50.9	267.3	259.7	667.2	205.6	608.3	0.7	0.3	172	120.1	309.6	104	12.5	44.9	8.5	0.2	0.1	95.8	5.9	521.1	0.4	5	242.6	394.2	474.1	603.6	0.4	0.5	1.1	1.7	1	1.4	188.5	260.4	7.8	3.9
chrV	10315224	10317371	B0024.10	9.7	6.4	13.2	10	36.2	39.1	36.3	40.8	38.3	43.8	15.2	13.5	10.4	7	9.9	22.5	21	7.4	29	24.9	28	28.4	28.8	24.5	24	22.8	26.4	31.5	11.1	19.8	15.2	10.4	10.9	13.4	11.6	17.8	13	15.3	15	23.8	19.4	13.5	11.9	12.9	14.3
chrV	10317464	10319509	B0024.11	15.6	11.8	22.4	13.1	30.3	28.9	27.2	30.6	29.4	33.9	20.6	18.9	18.3	14.3	13.2	35.2	36.6	16	21.4	18.3	21.3	10.7	11	10.7	36.1	35.5	17.2	14.4	10.4	24.3	22.9	12.5	13.1	14.3	14.8	23.4	15.9	20.3	20.3	23.6	20.2	13.3	16.7	21	19.4
chrV	10319508	10320161	B0024.12	18.5	11.1	21.9	16.2	9.2	6.6	9.2	7.1	5.7	8.2	20.4	26.2	15.3	17.9	19.4	11.3	21.1	17.5	5.8	4.6	4.7	8.1	10.9	7.5	14.6	16.9	2.4	16.4	21.3	29.6	17.7	17.7	26.5	25.1	21.5	22.8	33.6	33.1	22	25.6	26.4	16.4	14.6	18.1	27.2
chrV	10320689	10322190	B0024.13	11.9	6.9	16.6	10.9	55.3	46.7	48.3	46.7	49.9	43.6	16.7	13.7	16.7	12.4	12.4	40.2	33.2	5.6	40.4	39.3	40.2	26.2	28.2	26.7	37.4	35.7	36.5	48.8	19.9	31.6	25.4	16.4	13.7	14.2	16.1	16.2	13.7	14.7	15.3	21.6	26.1	15.8	18.6	16.1	20.8
chrV	10322261	10332087	B0024.14	7.2	9.1	8.5	12.5	6.7	5	5.7	5.7	4.1	6.1	13.4	10.4	13	18.3	16	3.9	2.5	9.9	4.8	6.4	6	10	8.4	7.3	3.8	3.6	5	12	16.1	6.9	11.7	11.1	13.7	13.9	15.2	8.6	7.9	10.8	12.2	6.7	8.9	12.8	12.4	12	9.1
chrV	10289695	10291685	B0024.15	2.7	1.6	1.9	1.6	0.2	0.2	0.2	0.2	0.1	0.2	1.4	0.6	1.4	1.8	0.9	0	0	0.1	0	0.2	0.2	0.5	0.7	0.6	0	0	0.1	1.1	1.2	0.1	0.3	2.1	1.4	1.2	1.8	0.1	0.7	0.5	0.4	0	0.3	1.1	1.7	0.7	0.2
chrV	10293492	10294596	B0024.2	16.2	14.1	37.6	5.5	23.9	10.3	33.4	11.1	13.7	9.9	12.6	11.8	36.1	10.4	13.5	0.2	0	8.6	22.8	80.2	21.1	11.8	21.2	13	0.1	0.1	16.5	9.2	7.3	0.8	5.8	23.5	10	9.2	11.5	0.8	1.3	1.2	1.3	0.7	2.6	29.4	46.9	6.1	2.3
chrV	10287538	10289247	B0024.3	1.6	3.1	3.6	1.3	0.5	0.3	0.3	0.2	0.4	0.2	0.7	1.3	1.1	1.9	1.5	2.1	2.3	0.6	0.3	0.2	0.5	1.1	1.3	0.7	1.3	1.6	0.1	1.5	1.6	1.8	2.1	2.2	1	2	2.4	2.3	1.2	1.6	2.7	1.8	2.3	2.3	2.2	2.9	2.3
chrV	10297373	10298957	B0024.4	9.7	6.7	21.1	0.4	5.8	12.4	17.4	20.1	12.3	15.2	3.1	5.5	13	0.7	0.8	0	0	0.2	12.4	26.3	1.2	3.6	6.8	4.7	0	0	1.6	10.2	3	2.2	4.3	3.8	3.1	4.4	5.2	0	0.3	0.7	1.2	0	3.4	3.5	3.5	3.3	1.9
chrV	10308265	10314343	B0024.6	0.1	0.1	0.1	0.1	0	0	0	0	0	0	0.1	0.2	0	0.2	0.1	0	0	0.1	0	0	0	0.1	0.1	0	0	0	0	0.1	0.1	0	0	0.1	0.1	0.1	0.2	0.1	0.2	0.2	0.3	0	0.2	0.1	0.1	0.1	0
chrV	10299447	10307329	B0024.8	1.5	1.4	1.6	2.2	0.3	0.2	0.9	0.5	0.2	0.4	2.2	1.7	1.8	2.9	1.9	0.2	0.2	1.3	0.1	0.3	0.3	0.9	1.2	0.7	0.3	0.2	0.3	2.2	1.8	1.3	2.9	1.9	2	1.9	2.1	3.9	4.6	5.7	7	1.7	2.5	2.2	2.5	4.4	2.8
chrV	10314615	10315751	B0024.9	26	25.4	28.5	23	23.9	21.1	23.8	25.1	19.2	27	30.6	32.1	23.8	25.7	25.4	22.7	24.9	17.9	14.2	15.5	17.2	28.8	23.9	23.8	22.6	24.1	15.7	28.4	27.3	20.7	17.9	22.1	32.9	32	33.2	25.2	28.8	24.8	19.1	19	12.9	19.8	22.1	18.6	17.4
chrI	6028487	6033460	B0025.1	16.6	15.6	21.6	15.4	12.6	9.9	11.2	13.6	10.9	14.1	17.7	17.6	14	14.7	13.8	22.8	29.8	8	8.9	8.1	8.9	11.1	10	8.8	24.8	28.3	8.7	14.6	16.6	34.3	32.2	15	13.5	14.1	14.7	27.1	23.3	33	31.8	30.4	34.8	18.8	13.4	29.8	27
chrI	6022658	6026983	B0025.2	25.8	23.8	37.7	23.7	40.3	35.2	34	41.9	38	49.8	28.8	27.4	19.4	24.9	23.8	150.6	149.5	11	28.6	25.6	35	27.5	27.4	24	142.6	143.2	27.4	31.7	21.1	99.2	88.6	22.3	24.5	25.4	24.7	77.4	51	72.9	71.6	118.2	85.7	25	26	65	77.7
chrI	6027193	6028373	B0025.4	35.4	24.4	48.6	15.2	49.2	42	41.1	50.8	43.4	57	18.9	16.6	18.8	20.9	22.6	134.9	123.9	7.6	42.8	31.8	41.5	16.1	19.9	16.5	141	140.5	34.9	18.1	17.1	102.5	91.1	18.8	15	16.5	20.2	60.8	81.6	73.6	70.9	101.2	89.6	21.7	26.3	58.9	86
chrI	6024152	6024957	B0025.5	0	0.5	1.5	0.7	96	28.9	111	64.6	32.7	53	1.4	2.1	1.3	0.7	1.2	5	0	0	44.4	126.4	44.9	835.5	742.6	806.8	3.3	1.2	43.2	963.7	3.9	0.8	1	0	0.8	1.2	0	0	0	0	0	0.3	2	0	0.5	0	1.6
chrII	5970079	5972638	B0034.1	20.5	21.2	24.9	4	5.4	1.8	5.6	2.7	3.1	2.5	3.5	2.7	6	16.2	6.6	0.8	1	3.9	3.5	9.8	4.2	3.5	4.3	1.5	0.2	0.1	3	1.6	5.7	2.9	12.7	8	6.7	8.9	9	2.1	6.8	7.6	12.3	1.4	3.3	14.6	10.1	9.6	6.9
chrII	5944170	5944343	B0034.2	0	0	0	0	0	0	0	0	0	0	0	0	0	0	0	0	0	0	0	0	0	0	0	10.2	0	0	0	0	0	0	0	0	0	0	0	0	0	0	0	0	0	0	0	0	0
chrII	5945380	5956660	B0034.3	80.9	137.4	111.5	132.9	21.6	12.5	23.6	18.3	10.5	18.9	56.4	58.7	57.8	181.1	96.4	28.6	13.6	75.6	17.2	25.2	20.4	62.3	73.7	65.4	29.9	21.5	18.1	67.7	93.6	37.6	107.7	81.2	75.9	80.8	84.2	114.3	124.1	93	127.1	40.2	61.3	104.4	95.7	149.7	83.6
chrII	5968109	5969033	B0034.4	0.5	0.9	1.1	0.5	1	0.4	0.5	0.4	0.4	0.6	0.5	0.2	0.2	0.6	0.2	0	0	0.3	0.1	0.8	1	11.6	8.9	11.7	0	0	0.5	11	0.2	0.3	0.8	0	0.2	0.1	0.6	0	0.4	0.2	0	0.1	0.2	0.7	0.5	0.6	0.3
chrII	5972830	5974952	B0034.5	0.5	0.4	0.4	0.4	0.3	0.1	0.3	0.3	0.3	0.1	0.6	0.8	0.7	0.7	0.3	0.4	0.9	0.6	0.3	0.3	0.1	0.4	0.8	0.5	1	0.7	0.5	0.8	0.4	0.5	0.6	0.3	0.9	0.6	0.9	0.2	0.4	0.7	1.2	0.2	0.6	0.1	0.1	0.2	0.7
chrII	5961651	5961975	B0034.7	18.6	7.4	22.5	34	5.8	3.9	15.2	2.5	3.2	1.9	20.8	14.1	4.8	20.3	26.6	0	0	32.5	6.9	1.7	6.6	13.3	10.6	12	0.6	0.6	7.5	9.7	25.2	22.5	29.7	25.6	21.1	23.6	29	131.6	146.8	186.7	88.9	48.1	56.1	4.5	24.8	39.1	39.1
chrIV	11310949	11312475	B0035.1	58.4	30	59.6	44.6	96	95.1	89.1	85.9	87.1	92.1	58.1	55.6	52.9	43.7	53.2	290.2	285.8	40.9	67.9	69.6	77.2	51.2	52.8	50.9	314.1	293.3	68.4	76.2	44.6	240.6	160.5	44.6	54.1	66.8	63.6	161.4	126.5	147.4	140.1	200.4	185.7	48.8	62.7	152.5	166.3
chrIV	11326534	11327321	B0035.10	2.7	8	2.2	7.2	5.1	7	5.8	9.8	12.5	9.3	6.6	4.4	5.6	4.9	5.9	18.5	33.6	6	25.2	15.9	10.8	3	2.9	6.7	19.5	25.9	16.7	2	3.1	12	8.7	2.5	1.9	1.6	1.4	13.4	12	7.4	6.3	37.4	6.7	1.5	0.9	3.4	11.5
chrIV	11327591	11329349	B0035.11	22.2	14	28.3	20.6	40.6	42.2	36.2	41.7	42.5	45.3	23	22.9	18.7	19.6	20.1	131.7	104.5	18.6	38.9	27.9	36.3	25.6	26.6	23.9	126.1	110.1	33.6	25.6	18.4	81.2	79.8	22.8	21.8	24.4	22.2	75.5	53.6	55.2	56.4	67.6	71.4	24.8	22.3	57	68
chrIV	11329443	11332922	B0035.12	21.6	10.8	28.1	15.7	44.9	40.8	38.7	43.6	42.1	44.5	22.9	21.5	20.4	17.2	18.1	20.1	20.9	14.9	34.4	30.4	32.2	14.2	15.5	13.6	21	20.2	29.7	17	15.8	15.8	18.3	15.8	16.5	16.3	16	13.5	9.1	11.6	11.3	14.2	12.7	16	16.8	12.6	11.4
chrIV	11304698	11306698	B0035.13	21.6	85.2	39.4	25.4	38.9	26.5	28.2	21.2	15.9	26.7	28.6	24.7	20.3	26.6	28.4	0	0	16.5	15.7	19.6	13.4	28.7	41	52.4	0.1	0	10.7	45.4	39	0.8	0.9	33.2	38.8	43.5	50.3	1	3.1	3.5	4	0.4	0.6	39.6	15.1	1.1	1.1
chrIV	11298985	11304765	B0035.14	39.2	26.3	52.1	28.9	39.9	32.3	35.2	37.6	35.8	40.5	32.3	29.5	27.8	31.2	29.2	30.4	31.5	24.5	26.4	28.8	27.7	35.4	37.7	33.6	27.5	29.4	25.8	45.9	34.4	47.9	49.1	32.6	31.5	32.4	28.7	48.3	46.9	68.2	59.9	50	53.4	32.7	30.8	52.7	47.7
chrIV	11296968	11298397	B0035.15	28.5	7.9	26.3	14.9	23.7	21	21.3	24.2	20.7	23.2	21.5	17.4	15.3	16.9	21.3	13	12.9	15.3	20.6	18.6	21.6	13	15.7	11.8	13.2	12.1	19.1	18.9	17.4	16	19.6	11.5	16.8	16.8	18.8	17.4	15.7	17	14	16.3	18.6	11.7	14.3	13.8	12.1
chrIV	11295125	11296867	B0035.16	3.9	1.3	2.7	1.5	3.6	4.2	4.1	4.3	3.6	4.5	1.8	2.1	2.1	1.9	2.4	5.9	6.6	1.1	3.1	3	3.1	2.8	2.2	2	5.1	4.1	3.7	3.1	2.2	4.8	3.5	3.4	1.5	2.2	2.3	2.5	2.5	3.2	4.1	2.2	3.9	0.9	2	3.1	3.2
chrIV	11320297	11320621	B0035.18	3.2	6.9	0	15.5	124.7	84.4	113.7	112.5	105.9	123	18.5	20.3	16.1	7.6	6.2	129.6	172.1	6.8	85.1	71.7	70.9	135.8	114.7	137.7	137.9	152.7	71.1	86.8	15.4	91.3	92.1	19.1	15.5	21	16.1	94.9	87.7	44.9	52.8	72.7	40.5	0	7.4	34.9	55.3
chrIV	11312450	11313960	B0035.2	33.5	11.9	40.8	29.4	29.6	27	29	31.8	29.3	30.5	43.8	35.4	27.3	24.7	29	18	21.3	25	18.7	21.1	23.1	15.9	20.4	18	21.7	18.7	19.4	25.5	33.6	31.6	24.2	28.1	35.3	37.6	33.8	26.4	27.5	31.1	26.1	24.2	32	31.2	25.4	22.5	24.1
chrIV	11314054	11315028	B0035.3	23.2	10.7	23	17.3	53.1	51.6	53.5	60.4	50.7	59.8	21.4	21	16.5	12.2	11.8	38.6	27.5	9.4	35.6	29.4	37.9	30	32.5	29	34.1	30.2	31.5	39.3	20.8	33.4	31.3	10.7	14.6	19.2	16.6	22.8	20.2	17.6	16.1	22.3	21.9	15.7	17.3	13.1	18.1
chrIV	11315182	11315855	B0035.4	52.3	52.8	56.5	70.9	88.2	80.6	70.2	91.4	69.5	101.7	73.4	89.9	58.2	67.5	82.1	149.1	129.9	58.8	69.2	64	66.6	36.6	48.7	39.6	145	133.8	56.9	43.3	49.4	100	121.6	58.5	76.9	104.7	109	136.4	166	86.2	92	117.4	82.9	46.8	57.9	88.3	90.7
chrIV	11317394	11319928	B0035.5	36.2	18.9	42.8	30.7	53.7	38.3	36.6	42.7	43.9	47.4	47.9	47.6	38	45.4	46.1	23.2	24.2	26.5	27.6	28.7	33.9	22.4	28.5	24	23.7	22.8	32.1	46.3	30.4	19.7	19.3	25.9	28.6	32.3	36.5	16.9	14.5	20.5	17.9	20.1	17.9	31.4	41.4	13.9	15.3
chrIV	11320777	11323614	B0035.6	9.1	4.1	8.3	5.6	44	46	37.2	51.9	48.6	57.3	12.6	12	9.7	5.3	4.6	111.6	106.8	3.6	34.6	25.6	36.9	12.9	14.8	12	118.7	107	34.1	16.3	5.4	45.7	38.4	4.7	6.7	6.6	5.7	34.3	14.5	17.3	24.6	23.2	33.3	3.4	6	17	29
chrIV	11323862	11324448	B0035.7	1.7	10.8	1.5	12	24.1	30.2	25.8	33	40.7	19.1	8.3	10.1	11.8	10	11.9	61.9	81	16.5	96.2	58	49.2	13.8	11.1	20.7	65.2	77.8	68.7	6.2	4.7	33	28	5.3	3.4	3.5	1.8	35.6	48.7	29.7	16.7	119.9	28.3	2.4	4.6	13.7	26.5
chrIV	11324696	11325200	B0035.8	19.2	23.4	18.7	27.7	50.7	64.6	60.3	68.7	91.7	44.2	31.5	23.6	29.4	27.2	33.6	146.1	205.1	32	133.4	120.7	75.9	26.7	28.9	49	147	181.4	90.2	17.4	15.7	96.9	85.5	13.1	15.8	11.5	12.5	99.2	119.5	64	39.2	314.8	50.2	14.5	11.5	34.2	72.9
chrIV	11325995	11326307	B0035.9	7.5	13	5.6	10	7.9	17.2	9.5	13.5	23.1	9.2	5.8	5.7	4.2	9.3	7.2	40.4	72.7	12.2	40	32.9	22.1	8.9	6.9	14.9	48.7	55.2	33	1.4	2	43.8	47.3	4.6	4.3	3.1	3.5	38.9	44.3	12.3	18.1	45.8	14.9	1.9	2.5	13.2	28.5
chrI	4664499	4665349	B0041.1	0	0	0	0	0.9	0.3	1.2	0.3	0	0.5	0.2	0	0	0	0	1.3	0.6	0	0.4	0.6	0.3	9.7	7.2	8.5	0.7	0.4	0.3	11.5	0	0.8	0.8	0	0	0	0	0	0.2	0.4	0	0.2	0	0	0	0.2	0.1
chrI	4653471	4660152	B0041.2	140.7	92	179.5	79.2	53.1	53.3	61.8	67.1	57.3	64.8	67.8	67.9	59.1	76.4	58.5	166.7	171.4	50.5	55.2	55.7	58.3	60	58.1	51.8	163.8	163	53.5	58.9	74.9	183.8	171.9	79.7	67.1	58.5	62.4	155.3	128.7	141.5	140.3	223.7	152.5	89.1	63.2	184	178.5
chrI	4644437	4645627	B0041.3	5.5	6.1	7.1	8.4	5.7	7.2	5.8	6.6	6	5.3	8.5	8	5.9	8.5	7.8	21.5	16	4.2	5.5	5.3	6.6	5.7	7.9	6.5	16.8	19.4	5.8	9.1	12.3	27.3	27.9	7.9	8	10.5	11.3	24.9	39.7	36.7	26.3	31.8	31.7	10.7	8.8	26.5	29.8
chrI	4645636	4646966	B0041.4	2944.3	3688.8	2686	4522.7	2614.1	3381.9	3441.5	3320.1	3454.3	3271.2	5085.7	5105.7	5550.8	4732	4626.1	709	865.4	4265.1	2863.5	3037.4	2893.1	2678.5	1981.6	2170.5	698.9	829.6	2885.3	2497.6	5629.1	1042.4	949.7	5210.1	5116.8	5043.7	4867.9	1691.2	1766.6	1475.7	1356.7	1184.7	1302.3	4307.7	5496.9	1318.7	1201.2
chrI	4648269	4650771	B0041.5	21.9	12.2	20.1	13.8	37.2	37.5	35.1	36.3	34.6	37.8	19.4	17.5	14.4	11.8	9.9	51	42.2	7.7	25.3	25.3	28.8	33.1	31.8	30.6	53	46.7	25.8	57.1	15.2	37.9	36.5	15.4	16.8	17	15.2	31.8	29.7	38.3	35	28.8	36.6	17.7	14.2	29.3	29
chrI	4652143	4652907	B0041.6	14.8	18.9	18.6	13.5	14.1	14.7	11.8	13.4	15.7	13.7	15.2	12.2	15.5	18.4	14.4	11.1	9.4	17.6	11.5	12.4	14.3	9	14.5	10.2	15.2	10.5	10.2	12.9	14	21.2	29.2	12	12.2	22	17.9	24.9	48.4	47.1	31.8	25	19	24.2	12.6	20.9	24.3
chrI	4665744	4671739	B0041.7	31.5	16.5	38.9	20.1	24.2	19.9	21.1	23.8	23.2	24.6	18.6	18.6	16.5	21.7	20.3	58.7	63	13.9	20.4	18.4	19.8	18.4	21.1	19.6	59	62.5	18.3	26.1	19.8	65.6	65.3	16.5	16.1	16.5	17.8	43.9	34.2	51	47.5	69.8	68.6	22.6	17.9	47.1	51.3
chrI	4647309	4648279	B0041.8	11	11.4	16.4	10.8	71.7	91.9	60.3	88.2	79.4	95.8	16.5	20.4	13.3	12.5	9	164.1	153.7	8	78.6	53.4	66.4	32.1	28.7	31.9	155.5	166.6	59	33.3	9.2	110.6	80.5	11.5	13.9	15.9	14	81.8	61.6	47.7	43.8	80.5	82.2	13.3	13.4	49.5	66.8
chrII	2040275	2041620	B0047.1	0	0.1	0.1	0.4	0.5	0.9	0.6	0.9	0.9	1	0.6	0.5	0	0	0.2	0	0	0.1	0.5	0.5	0.9	0.7	0.5	1	0.1	0.1	0.6	1.2	0	0.3	1.5	0	0.1	0.4	0.5	0.5	0.4	0.3	0	0.4	0.3	0.2	0.1	0.5	0.7
chrII	2043027	2044109	B0047.2	0.7	0.2	0.7	0.5	2.1	1.3	1.4	1.6	1.8	1.4	1.4	0.8	0.5	0.5	0.3	0	0.4	0.5	0.8	0.8	1	1	1	0.8	0.3	0.3	1	1.5	0.6	0.7	0.9	0.8	0.3	1	0.2	0.7	0.5	0.4	1	0.7	0.6	0.5	0.4	1.3	1
chrII	2044628	2046589	B0047.3	0.3	0.4	0.6	0.6	2.6	2.6	2.5	3.1	2.9	3.1	1.1	1.3	1.4	0.8	0.7	0.6	0.7	0.5	1.7	1.1	1.6	2	1	1.6	0.4	0.4	1.4	2.1	1	0.8	2.2	1.1	1.1	0.8	1.1	1	0.6	1	1.7	0.8	1.2	0.9	0.5	1.5	1.5
chrII	2045967	2046661	B0047.4	0	0	0	0	0	0.1	0	0.1	0	0	0.1	0	0	0	0	0	0	0.1	0	0.1	0	0.2	0	0	0	0	0	0.3	0	0.1	0.5	0	0	0.1	0.1	0.1	0	0	0	0.2	0.2	0.1	0.2	0.1	0.2
chrX	12031377	12033969	B0198.1	3.3	1.2	2.8	1.6	1.6	1.1	1.1	1.7	0.7	0.9	3.5	2.3	3.1	2.5	2	0.4	0.2	1	0.6	0.9	0.9	1.2	1.3	0.7	0.7	0.6	0.8	2.3	3.3	6.5	8.3	3.4	3.6	1.9	2.8	9.8	11.4	16.8	16	8.8	8.6	2.1	2.4	10.9	8.4
chrX	12028642	12031549	B0198.2	3.2	2.5	6.4	3.8	1.6	1.1	1.9	1	1.1	1.3	2.7	2.6	3.5	4.3	3.9	0.8	0.4	2.7	1.2	1.5	1.6	1.5	1.7	1.2	0.2	0.1	1	3	3.5	0.5	4	4.5	2.8	3.9	2.4	2	3.5	6.7	5.6	1.2	1.9	2.4	4.3	4.4	2.3
chrX	12042547	12049279	B0198.3	4.9	4.6	4.7	4	1.1	1	1	1	0.9	1.2	2.8	3.4	3.8	4.1	4	0.2	0	2.7	0.5	1.3	0.6	1.2	1.1	1.2	0.1	0.1	0.6	1.8	3.6	4.2	6.1	5.1	3.5	3.3	3.6	8.5	8.2	9.6	12.6	6.1	7.8	9.2	5.6	10.1	6.3
chrI	10713438	10718190	B0205.1	5.9	3.3	7.3	5.5	20	18.5	15.4	19.6	18.6	21.6	7.5	8.3	6.7	4.9	4.4	48.3	49.3	2.8	14.3	10.3	14.7	10.8	10.4	9.8	48	48.1	12	13.8	4.8	32.3	28.2	5.4	3.9	6	4	18.3	12.9	16.6	20.3	26.7	25.1	4.2	4.7	18.1	22
chrI	10708351	10710364	B0205.10	0.2	0	0	0.1	21	8.4	33.3	14.9	11.5	13.1	0.3	0.2	0	0	0	0.8	0.4	0	10.7	40.9	17.2	540.3	463.3	475	1.2	0.8	14.9	526.6	0	0	0.4	0.7	0.1	0.1	0	0.5	0	0	0	0.1	0	0.1	0.1	0.1	0.2
chrI	10732530	10733674	B0205.11	46.9	32	56.5	55.7	55.6	57.5	61.6	71.1	62.5	71.7	76.3	84.1	68.3	50.8	54.5	59.6	60.2	45.6	40.9	43.1	40.9	34.2	28.3	25.6	56.9	62.9	35.9	47.2	60.8	67.8	57.8	56.4	56.4	59.2	59.8	41	46.4	56.1	48.6	62.8	63.1	40.4	52.7	49	47.8
chrI	10730455	10730701	B0205.12	46.2	70.9	33.4	108	111.3	102.3	86.6	69.5	47.4	125.4	118.5	156.7	118.7	83.4	174.9	70.2	79.6	101.7	83.1	141.6	95.4	134.5	122.2	116.5	99.2	73.5	89.1	106.2	136.7	190.8	167	11.3	103.2	164.2	195.5	293.1	262.6	144.2	94.4	220.5	154.5	64.9	54.4	163.2	122.9
chrI	10727739	10728784	B0205.13	13	9	14	6.7	1.3	0.2	2.4	0.8	5.6	1.3	15.6	16.2	13.1	3.8	6.1	0	0	2.6	2.5	2.8	3	11.1	10.8	18.9	0.2	0.2	4.3	16.2	8.9	0.4	16.8	9.7	9.5	6.7	10.6	3.6	4.2	7.3	7.6	3.5	1.1	10.5	14.6	29.5	16.8
chrI	10726906	10727340	B0205.14	6.4	10.2	5.4	1.4	3.5	0	2	1.1	2.6	0	5.7	8.8	2.6	2.1	1.5	0	0	0	2.3	2.3	0.8	14.2	6.8	17.6	0	0	0	10.2	0	0	19.7	0	1.7	1.2	2.5	0	0	1	0	0.7	0	4.1	1.9	13.7	7.8
chrI	10724149	10726125	B0205.2	0.2	0.1	0.2	0	0	0	0	0	0	0	0.1	0.1	0	0.1	0	0	0	0	0	0.1	0.1	0.1	0	0	0	0	0	0.2	0	0	0.2	0	0	0.1	0	0.1	0	0	0	0	0	0.3	0.1	0.1	0
chrI	10730717	10732437	B0205.3	87	36.4	89.4	78.4	83.5	89.3	77.4	99.1	87.3	100.6	77.1	73.3	54.9	53.5	58.4	222.5	202.9	56	72.3	61.4	76.8	124.7	107.6	110.7	225.3	211.3	71.7	114.5	63.4	124.6	96.3	67	70.1	77.2	70.7	72.9	44.5	56.4	54.2	66.8	86.3	75.1	55.9	64.3	72.5
chrI	10741357	10744432	B0205.4	1.2	1.1	1.8	3.4	0.1	0	0.3	0	0	0	5.4	6.3	4.4	3.3	3.8	0	0	1.5	0	0.2	0	0.1	0	0.2	0.1	0	0.1	0.2	5.3	2.8	3.8	4.5	3.8	3.1	3.3	6.2	3.9	8.6	7.2	3	4.7	4.3	1.3	6.1	3.7
chrI	10740206	10740579	B0205.5	0	1.8	0	2.2	1.3	0	1.5	0	0	0	0	0	0	0	0	0	0	0	1.2	0	1.2	0	1.5	0	1.3	1.3	1.9	0	3.1	0	1.5	0	0	1.8	0	0	0	0	0	0	1.7	0	0	0	0
chrI	10736685	10739900	B0205.6	34	19.2	43.5	33.1	24.3	20.7	22.6	26.9	24.3	28.5	45.1	39.7	33.3	31.5	32.7	19	18.3	29.1	17.6	15.9	18.9	20.8	15.7	15.2	19.2	18.5	17.8	28.5	31.1	23.7	28.2	31.9	40.5	39.3	37.1	27.3	24.4	34.2	32	22	24.4	33	32.7	24.4	18.6
chrI	10734010	10736610	B0205.7	318.7	170.2	378.8	203.7	205.4	172.7	184.5	185.8	182.1	175.8	206.5	190	209.1	250.4	219	549.6	568.7	159.8	146.3	155	147.5	186	150.5	133	551	541.2	132	210.9	227.8	469.4	313.7	197.3	188.5	199.8	201.1	307	267.1	283.4	306.8	542.6	342.6	231	218.6	323.3	366.2
chrI	10728883	10730226	B0205.8	64.4	36.2	66.1	32.2	67.8	61.1	66.7	70.4	64.5	61.2	49.9	39.6	40.2	32.9	44.6	179.9	137.4	42.5	65.6	59.3	73.6	40.8	47.9	43.6	171.6	165.5	64.1	45.3	37.2	122.6	107.3	45.5	49.9	66.6	59.2	142.7	129	78.3	69.1	195.1	100.3	37.1	55.7	116.2	108.5
chrI	10720814	10723580	B0205.9	5.5	4.8	9.2	4.3	23.6	23.4	19.6	24.6	22.5	26.1	7.7	6.9	6.6	5.5	4.3	59.5	59.5	2.9	18.2	11.9	18	9	10.6	7.5	59.5	55.2	18.1	10.9	4.9	37.1	30.4	7	3.8	5.1	5.5	24.7	15.7	20.4	22.4	24.3	28.3	3.6	3.9	18.5	23.8
chrI	5965063	5967213	B0207.1	0	0.1	0	0	2.5	0.6	2.7	1.3	1.1	1	0.1	0	0	0	0	0	0	0	1.1	4.1	1.3	32.9	29.7	32.2	0	0	1.5	36.9	0	0	0.1	0.2	0	0	0	0	0.1	0	0	0	0	0	0	0.1	0.1
chrI	5959009	5959528	B0207.10	16.8	32.9	17.6	13.8	1.4	0.6	2.3	1.8	1.4	0.7	10.1	11.7	3.1	12.4	8.1	0	0	5.7	1.9	3.7	1.3	6.1	6.9	4.3	0	0	2	6.2	4.8	0	6.2	7.9	6.7	12.3	16.6	0	6.8	1.6	0	0	2.3	3.2	4.6	1.2	7
chrI	5962953	5964128	B0207.11	0	0	0	0	2.3	0.4	2.6	1.5	1.7	1	0	0	0	0	0	0	0	0	1.1	2.2	1.4	30	29.6	30.3	0	0	1.8	34.3	0	0	0.2	0	0	0	0	0	0	0	0	0	0	0	0.1	0	0
chrI	5967252	5973322	B0207.12	5.3	4.3	6.7	4.2	1.3	1.2	1.3	1.3	1.5	1.9	6.4	6	5.2	4.7	5	0.8	1.9	3.8	0.9	1.4	0.8	2.1	1.5	1.5	0.7	1	0.8	4.1	5	3.4	9.8	6.7	4.8	5.6	6.2	5.9	9.2	14.5	19	3.2	5.5	10.1	7.5	13.4	7.2
chrI	5955031	5956885	B0207.2	1.9	2.6	2.9	2.7	1.6	0.4	1.3	0.8	0.8	0.6	0.6	1.4	1.1	1.8	1.2	0	0	0.8	0.7	1.5	1.4	2.6	1	1.3	0.3	0.4	0.9	1	1.4	1.1	2.8	2	1.6	1.8	1.2	1.6	1.9	2.2	1.5	1.4	1.1	1.4	2	2.5	1.8
chrI	5942420	5945539	B0207.3	2.5	2.5	2.3	1.3	0.4	0	0.4	0.3	0.3	0.5	1.1	1.2	0.6	2.5	1.3	0.4	0	0.7	0.2	0.2	0.2	0.7	0.3	0.5	0.2	0.2	0.2	1	0.7	0.4	1.6	1.7	1	0.8	0.9	0.7	0.5	1.5	1	0.5	0.4	1.9	1	1.2	1.1
chrI	5937478	5938887	B0207.4	9.2	4.7	8.8	7.5	52.5	48.8	46.4	50.7	48.7	54.2	10.1	11.3	7.9	6.8	5	157.6	162.5	7.3	44.9	36.9	44.4	42.3	45.6	47.5	157.6	154.7	39.5	47.1	7.3	113.9	92.9	8.3	9.5	8.1	7.9	68.7	44	59	63.1	101	91.1	16	7.3	61.5	75
chrI	5919788	5935418	B0207.5	0.2	0.1	0.1	0	0	0	0	0.1	0.1	0	0.1	0.1	0	0.1	0	0.1	0.1	0	0.1	0.1	0.2	34.2	55.6	46.8	0.1	0.1	0.2	71.3	0	0.2	0.4	0.1	0	0	0	0.3	0.2	0.3	0.2	0.7	0.2	0.1	0.1	0.2	0.2
chrI	5935371	5936946	B0207.6	9.4	6	11.5	6.8	25	22.4	23.8	27.8	22.3	28.8	10.2	10.7	9.9	8	6.7	15.2	18.4	3.6	16.1	11.1	16.6	6.1	5.7	5.9	16.6	18.2	11.7	10.5	6.7	18.2	21	8.7	6.9	7.1	9.3	15.1	9.7	13.8	9.7	13.5	15.4	5.8	7.6	13.1	12.7
chrI	5945758	5947344	B0207.7	0	0.1	0.1	0.2	1.5	0.4	1.9	1.8	0.7	1.5	0	0.1	0	0.1	0	0	0	0.1	0.5	2.3	0.9	32.3	28.5	31.9	0.1	0.2	0.5	41.7	0	0.1	0.1	0	0	0	0	0	0.1	0	0	0	0	0.1	0	0	0
chrI	5951137	5951744	B0207.8	0	0	0	0	0	0	0	0	0	0	0	0	0	0	0	0	0	0	0	0	0	0	0	0	0	0	0	0	0	0	0	0	0	0	0	0	0	0	0	0	0	0	0	0	0
chrI	5957461	5958361	B0207.9	0.5	0	0	0	7.2	2.2	8.2	2.8	2.8	3.5	0	0.3	0	0	0	0	0	0	2.5	4.9	3.1	72	75.1	71.9	0.2	0.2	2.6	81.9	0.5	0	0.2	1.1	0.4	0.3	0.3	0	0.4	0	0	0	0.1	0	0	0	0
chrIV	3572466	3577625	B0212.1	4.5	0.7	2.7	4.2	0.6	0.5	0.7	0.7	0.7	0.7	2.3	3.4	0.8	1.3	1.3	1.6	1.4	4.1	0.4	1	0.5	0.4	0.3	0.2	0.9	0.8	0.5	0.5	3.5	1	1.5	3.5	2.6	1.8	2.1	2.8	3	4	5.1	1.1	1.6	3.2	1.9	2.4	1.3
chrIV	3565196	3567810	B0212.2	0.1	0.4	0.2	0.3	0.1	0	0	0.1	0.1	0.1	0.1	0.2	0	0.5	0.5	0	0	0.1	0	0	0	0.1	0.1	0	0	0	0	0.1	0.5	0	0	0.6	0.1	0.3	0.6	0	0	0.1	0.2	0	0	0.5	0.1	0	0.1
chrIV	3540183	3543598	B0212.3	0.8	1	1.7	1.1	2.7	4.1	2.5	4.9	2.6	4.9	1.7	1.3	1.5	0.8	1.1	15.8	18.3	0.7	2.7	2	3.6	2.3	1.7	1.6	16	17.8	3.7	1.5	1.3	16.4	16.4	2.4	0.9	1.1	1.1	9.5	5.6	10.6	9.8	10.8	14	1.1	1.6	7.7	9.9
chrIV	3543623	3547596	B0212.4	3.8	3	3.6	2.1	3.1	2	3.6	2.1	1.8	1.7	2.5	2.1	2.3	1.5	2.3	0.4	1.6	1.5	1.8	2.9	2.2	8.5	8.3	7	0.9	1	2.1	9.7	1	1.8	1.7	3.6	1.6	2	2	2.1	1.8	3.1	3.1	1.7	2.2	0.2	1.5	2.3	1.5
chrIV	3550883	3557427	B0212.5	3.3	3.2	3.8	2.8	0.5	0.3	0.3	0.2	0.3	0.4	2.4	2	2.1	3.7	3.2	0.1	0.6	2.5	0.5	0.3	0.3	1.2	1	0.7	0.2	0.4	0.4	1.7	1.1	0.7	1.8	1.4	1.9	2.5	2.8	2.1	2.3	2.9	3.5	0.5	1.5	3.2	2	3.3	3.1
chrIV	3570714	3571642	B0212.6	1.8	0.2	1.1	10	1.2	0.8	0.7	1.5	1.8	1	4.1	4.6	1.2	2.1	1.8	0.8	1	7.4	1.6	1.9	0.7	1.2	0.2	0.2	1.5	1.3	0.9	0	3.6	1.5	2.2	0	4.5	3.5	2.2	3.6	9.2	8.1	6.1	1.7	3.7	6	3.7	2.2	1.7
chrV	3955750	3957700	B0213.10	0.5	1.1	0.5	0.4	0.7	0.5	0.4	0.5	0.4	0.4	0.6	0.4	0.8	0.9	1	0	0.2	0.3	0.2	0.4	0.3	2	1.4	1.9	0	0	0.4	4	1.7	0	0	1.3	1.2	0.8	1.2	0.1	0.1	0	0.1	0	0	0.5	0.5	0.2	0.1
chrV	3958223	3961174	B0213.11	0.7	0.6	0.9	0.7	1	0.5	0.7	0.7	0.4	0.4	0.6	0.4	0.5	0.8	0.4	0.2	0	0.2	0.4	0.6	0.6	1.6	1.5	1	0.3	0.3	0.7	1.4	0.3	0.3	0.8	1.4	0.7	0.5	0.7	0.3	0.7	0.9	0.4	0.2	0.5	0.9	0.7	1	0.5
chrV	3961744	3963800	B0213.12	0.4	0	0.4	0.2	0.1	0.2	0.3	0.3	0.1	0.2	0.1	0.1	0.2	0.4	0.3	0	0	0.3	0.3	0.2	0.2	0.9	2.1	4.3	0	0	0.2	1.8	0.1	0	0	0.7	1.2	0.3	0.1	0.1	0.1	0	0	0	0	1	0.2	0.1	0.1
chrV	3964763	3967856	B0213.14	7.4	10.2	11.3	3.9	7.2	6.3	8.7	4.9	6.2	6.7	6	5.1	7.2	8.4	7.4	0	0	3.7	9	9.4	11.6	12	9.9	10.3	0	0	10.7	12.3	7.3	0.1	0.9	6.3	6.8	4.8	4.9	0.3	0.6	0.8	1.1	0.1	0.3	4.1	3.7	1.2	0.9
chrV	3968117	3970499	B0213.15	4.5	14.6	3.9	22.7	3.4	1.2	5.4	6.8	1.5	3.2	8.9	5.2	5.4	24.4	15.6	1.3	0	7.5	2.3	1.6	4.4	59.5	34.8	56.8	0.6	0.9	4	27.8	17.1	0.9	1.7	16.6	16.7	10.1	8.8	3.1	0.6	0.8	1.4	1.1	1.2	15.4	9	2.2	0.7
chrV	3970696	3972986	B0213.16	0.3	0.6	0.3	1.1	0.5	0.1	0.5	0.2	0.1	0.1	0.5	0.3	0.9	2.2	1.5	0	0	0.5	0	0.4	0.4	1.6	2	1.9	0	0	0.1	3.4	1.5	0.1	0	1.7	0.9	0.3	0.6	0.1	0.1	0	0	0	0	0.3	0.6	0.1	0
chrV	3978810	3979119	B0213.17	90.9	120.7	88.2	875	97.9	160.1	255.6	253.4	53.9	286.5	319	349.7	124.7	117.9	115.5	14.8	26.4	205	26.1	102.6	36.1	2629	226.4	591.8	22.1	15.4	29.4	1190.7	471.1	120.4	250.3	592.6	319.8	712.6	435.6	118.5	187.2	244	141.2	72.4	93.4	588.4	356.1	121	134.9
chrV	3989075	3989755	B0213.2	52.5	240.4	118.9	100.1	206.3	276.7	228.8	222.5	190.8	249.2	87	70.4	189.7	106.4	152.1	0.5	0	44.8	142.3	144.3	156.5	601.2	389.6	533.5	0.3	0.3	163.6	430.3	169	8.1	30.9	117	159.9	297.5	467	0	2.5	1.1	5.5	0.5	17	66.6	173.7	16	21.2
chrV	3987884	3988302	B0213.3	15.5	232	18.7	30.6	38.3	18.6	102	28.6	33.9	53.4	13.4	20.1	26	39.2	23.8	0	0	13.4	32	78.9	80	186.7	149.5	204.1	0	0	49.8	119.6	35.5	0.7	4.1	19.7	11.9	21	27.5	0	3.8	1.8	0.9	0.5	1.4	7.2	18.7	2.3	3.9
chrV	3984397	3984834	B0213.4	255.8	559.8	392.7	972	69	54.3	350.4	74.3	42.1	99	194.4	218.9	346.1	293.3	325.3	2.5	0	196.1	70.3	156.1	179.4	1151.4	268.6	504.7	0.3	0.9	119.8	345.8	477.5	88.2	261.2	259.4	240.6	355.6	399.4	103.9	187.7	143.9	129.6	72.6	62	284.7	334.3	184.3	158
chrV	3981964	3982730	B0213.5	55.9	33.1	42.9	201.5	5.6	2	26.3	6.4	1.7	7.8	43.6	48.6	17.8	28.4	22.7	0	0.5	33.1	2.9	11.5	6.5	89.3	16.6	39	0	0.2	7.2	31.1	73.3	7.5	19.1	29	24.7	40	28.2	19.6	26.9	20.3	17.1	3.7	4.4	58	24.1	9.9	10.1
chrV	3980039	3980614	B0213.6	166.4	140.2	111.8	500.1	17	17.9	100.4	44.1	11.1	54.6	150.4	137.1	123	151.2	145.7	99.6	99.6	91	24.2	32.3	50.7	501.9	128.1	200.5	86.4	108.5	43.1	140.8	247.9	139.3	210.6	183.9	167	197	197.5	196.3	218.7	228.4	130.5	190.9	128.3	134.9	81.8	181.6	192.3
chrV	3977248	3978796	B0213.7	0	0	0	0.2	0	0	0	0	0	0.1	0	0	0.1	0.1	0	0	0	0	0	0	0	0	0	0	0.1	0.2	0	0.2	0	0	0	0	0.1	0.1	0	0	0	0.1	0	0	0.1	0	0	0.1	0.1
chrV	3974645	3976249	B0213.8	0	0.1	0	0	0	0	0	0	0	0	0.1	0	0	0	0	0	0	0	0	0.1	0	0	0	0	0.1	0.1	0	0	0	0	0.1	0.3	0	0	0	0	0	0	0	0	0	0	0	0.1	0.1
chrV	3954023	3955445	B0213.9	0	0	0	0	0	0	0	0	0.1	0.1	0	0.1	0	0	0	0	0	0	0	0.1	0	0	0	0	0	0	0	0.1	0	0	0	0	0	0	0	0	0	0	0	0	0	0	0	0	0
chrIV	8159343	8162028	B0218.1	36.2	157.4	71.9	25.5	22.5	14.7	18.6	13.8	11.3	12.1	25.4	25.8	28.4	62.9	40.8	3.9	4.5	16	9.8	17.1	9.9	22.3	24.3	23.1	3.9	3.8	7.8	44.1	33.2	4.5	11.5	39.4	30.5	31	44.4	8.7	11.5	14.3	18.9	4.2	6.6	55.2	36	11.1	7.5
chrIV	8152428	8154845	B0218.2	57.1	16.2	35.4	26.1	19.4	7.6	32.6	22.9	9.1	24.8	26.7	35	19.7	19	12.4	1.8	2	13.9	8.8	7.9	9.7	14.1	31.7	40.3	1.7	1.7	9.7	21.2	40.5	3.5	8.7	28.6	27.1	27.1	32.7	3.2	3.4	5.1	5	2.6	2.9	11.2	13.2	6.1	3.5
chrIV	8148779	8150727	B0218.3	14.8	20.9	17.3	21.8	9.5	8.2	11	10.5	9.8	11.1	21.6	19.2	18.3	15.1	17.5	34.5	32.2	12.1	6.1	5.8	8.2	8.3	6.7	6	31.8	29.9	6.6	10.8	20.2	55.8	50.2	29.1	18.7	20.3	20.6	37	38.1	49.2	45.4	26.5	53.9	22.5	23.1	44.3	42.4
chrIV	8155236	8156433	B0218.5	0.4	0.3	0.5	0.4	1.9	0.9	3.1	1.5	1	0.7	0.2	0	0.2	0.4	0.3	0.2	0	0.1	0.9	1.9	1.3	35.9	34.7	36.6	0.4	0.2	1.2	33.8	0.1	0.1	0.1	0	0.2	0.1	0.2	0.4	1	0.5	0.4	0	0.3	0.3	0.1	0.2	0.3
chrIV	8161737	8163781	B0218.6	16.5	8.1	17.8	14.7	10.3	5.8	9.3	8.9	7.6	10.4	13.8	15.9	14.7	13.2	14.3	0	0	13.1	4	4.3	6.3	19.7	12.1	12.5	0	0	6.6	21.1	15.7	0.4	0.7	18.4	12.6	10.1	13.9	0.4	0.7	1.2	3.1	0.2	0.5	8.4	12.7	0.5	0.1
chrIV	8164579	8166064	B0218.7	0	0.1	0	0	21.3	4.9	21.9	10.7	8.5	8.2	0	0.1	0	0	0.1	0	0.3	0	9.7	22.2	10.4	146.1	162.7	173.4	0.1	0	9.9	184.1	0.1	0	0	0	0	0	0	0.2	0.1	0.1	0	0	0	0	0	0	0.1
chrIV	8167148	8168760	B0218.8	9.5	7.9	14.3	13.6	1.4	3	3.4	24	16	28.1	25	25.6	13.3	11.4	11.1	0.3	0	17.7	4.3	12.6	12.3	6.3	12.4	13.2	0.2	0.3	9.4	7.9	6.2	0.2	9.3	6.7	16.1	2	1.9	0.5	3.7	0.8	0.9	0.2	0.7	9.8	8.9	9	2.3
chrV	9134276	9135553	B0222.1	8.2	9.8	8.2	7.1	1	0.5	0.9	1.1	0.8	1	5.7	4.9	5	14.5	9.3	0	0	5.3	0.6	1.5	1	3.5	3.8	3.2	0.3	0.2	1.4	5.6	7.1	0.7	2	8.9	7.3	6.8	7.6	1.3	1.6	1.3	2.6	0.7	0.9	12.3	8.4	3	1.5
chrV	9158360	9159515	B0222.10	0	0.1	0	0	0.1	0.1	0.1	0.2	0.2	0.1	0.2	0	0	0	0	0	0	0.1	0.1	0.2	0.6	187.8	213.1	205.5	0.1	0.1	0.2	453.9	0.2	0.3	0.2	0	0	0	0.1	0.3	0.1	0.3	0.2	0.2	0	0.1	0	0.2	0.4
chrV	9165796	9168018	B0222.11	0.8	1.3	1.9	1.8	0.8	0.5	0.6	0.7	0.3	0.5	1.4	1.9	2.7	3.4	2.1	0	0	1.9	0.6	1.1	0.5	1.4	1	1.6	0	0	0.4	2.6	2.5	0	0.2	2.1	2.8	3.1	2.6	0	0.4	0.9	0.5	0	0.2	1.6	2.7	0.3	0.2
chrV	9135633	9137696	B0222.2	0	0.1	0.1	0.1	0	0	0	0.1	0	0.1	0.1	0.1	0.1	0	0	0	0	0	0	0	0	0.2	0	0	0	0	0	0.1	0	0	0.1	0.2	0	0	0	0	0	0	0	0	0	0	0	0.3	0.2
chrV	9138927	9141375	B0222.3	2.2	3.4	2.4	3.8	1.1	0.9	1.2	2.2	1.4	1.9	3.2	3.5	1.1	2	1	0	0	2.1	0.8	1.3	0.6	2.7	1.2	1.2	0	0	0.7	1.8	3.3	1.3	1.8	4.3	1.5	1.8	1.5	3.8	3.7	4.9	3.4	2.3	2.1	5.5	1.1	2.1	1.7
chrV	9144592	9146877	B0222.4	4.7	6.8	3.9	5.6	2.9	1.7	5.3	2.3	1.7	1.9	3.4	3	1.9	3.7	2.3	0	0	2.5	1.3	1.5	3.4	2	1	1.6	0	0	2.5	5.8	2.4	0.6	0.3	3.5	4.3	4.4	2.6	2.9	2.9	3.5	0.9	2.5	1.5	2.7	1.4	0.8	0.7
chrV	9152298	9154850	B0222.5	8.1	20.7	20.5	4.6	19.6	11.7	20.5	13.8	15.3	14.7	9.2	6.5	19.1	21.9	15.3	0.8	0.2	6.7	10.1	17.9	13.8	50.7	25.1	22.3	0.2	0.2	13.8	30.2	9.5	0.3	2.6	11.1	8.9	12.2	20.1	0.1	0.6	0.5	1.2	0.5	0.5	7.8	19	0.9	1.2
chrV	9159618	9160640	B0222.6	5281.9	5613	3338.7	2616.8	266.7	103.9	483.6	346.6	200.8	250.1	3673	3585.1	8155.5	4062.3	5705.4	4.1	5.2	4313.8	228.1	1072.2	237.5	38.1	56.2	8.7	3.8	2.1	235.8	10.7	3647	162.2	427.5	4939.9	4411.1	4581.8	5349.9	296.6	967.7	497.1	1008.4	51.2	269.1	6440.7	9403.4	714.9	609.4
chrV	9162027	9162982	B0222.7	1238.7	702.7	1020.2	706.1	170.3	50.7	313.6	203.9	115.4	160.5	1090.2	1001	2133.4	830.1	1243.8	1.2	1.8	942.4	105.8	591.1	103.7	9.4	29.7	2.2	0.9	0.7	108.8	2.6	1017.1	54.6	117.5	971	1126.6	1365.8	1517.5	57.1	231	119.8	264.9	14.8	81.5	1650.6	2248.9	182.9	159.3
chrV	9164271	9165284	B0222.8	6616.6	6817	3847.6	2877.4	286.2	114.2	512.9	364.1	208.4	263.4	4017.8	3865	9009.7	4728	6786.5	4.7	6.6	4730.3	240.6	1153.2	244.8	36.5	57.7	9.4	4.3	2.5	245.6	10.9	4033.3	176.3	483.5	5405.3	5029.6	5238.4	6272.6	338	1063.3	553.2	1125.9	60.8	302.1	6971.5	10218.3	798.9	662
chrV	9168368	9173001	B0222.9	8.7	12.9	11.8	10.4	4	2.7	5.3	3.6	2.2	3.5	7.4	7.9	6.9	8.3	6.4	4.5	5	2.8	4.1	4.4	5.7	11.3	15	11.1	3.9	5	5.1	13.1	12.9	3.6	3.6	10.7	6.1	5.1	5.7	2.4	1.9	2.6	3.3	3.2	3.4	6.8	4.6	4.3	2.8
chrII	7755955	7756856	B0228.1	6.7	12.8	17.9	8.9	10.9	6.5	11.6	7.8	6.7	7.4	10.3	6	26.4	50.1	25.4	0.8	0	4.6	8	11	8.6	21.3	23.7	20.9	0.1	0.3	8	23.2	21.5	2.5	5	21.3	12.4	13.7	24.7	3.2	4.1	4.6	4.1	3.4	3.8	7.4	30.8	5.9	4.3
chrII	7724849	7752673	B0228.4	42.7	24.9	52.1	46.3	21.4	13.1	19.9	17	15.3	18.1	37.8	43.8	33.4	48.3	50	0.2	0.3	44.4	17.9	23.8	19.5	29.1	41	33.8	0.3	0.2	18.5	38.8	38.4	13.2	48.3	40.3	42	41.3	37.6	34.2	38.9	49.3	51.9	20.7	26.4	40.6	34.1	46	34.6
chrII	7752516	7753554	B0228.5	0.3	0.2	0.9	0.5	0.3	0.3	0.2	0	0.4	0	0.2	0.2	0.7	0.7	0.8	0	1.1	0.4	0.1	0.3	0.3	2	0.3	0.9	0.1	0.4	0	1.6	2.4	6.8	6.8	0	1.4	0.6	0.6	4.2	6.3	8.1	7.4	3.4	17.1	1.4	1.9	8.7	8.5
chrII	7754514	7755104	B0228.6	3.2	8.1	3.2	4.3	3.8	1.2	3.3	3.4	1.8	3.3	4.2	2.7	3.6	9.2	6.5	19.6	13	3.8	2	0.7	2.8	4.1	2	2	16.6	17.3	2	4.4	10.5	94.1	92.6	3.4	3.8	2.4	3.9	87.7	130.8	158	118.6	117	111.2	6.1	3.3	101.1	119
chrII	7757134	7758387	B0228.7	63.6	83.6	84.5	70.8	35.3	20.5	38.2	29.6	27.9	34.9	90	74.1	66.1	105.4	70.6	23.7	34.3	68.3	24	31.7	25.6	37.5	39.5	22.2	25.7	27.9	21	55.9	80.7	40.5	37.2	70	66.4	49.3	71.1	36.7	40.5	42.4	31.8	32.6	37	25.6	50.3	33.2	28.9
chrII	7759657	7761488	B0228.8	0	0.1	0	0	0	0	0	0	0	0	0.1	0	0	0	0	0	0	0	0	0	0	4.6	3.5	4.4	0	0	0	7.9	0	0	0	0	0	0	0	0	0	0.1	0	0	0	0	0	0	0
chrII	7762009	7763617	B0228.9	0	0	0	0	0	0	0	0	0	0	0	0	0	0	0	0	0	0	0	0	0	0	0.1	0	0	0	0	0.4	0	0	0.1	0.3	0	0	0.1	0	0	0	0.1	0	0	0.2	0	0	0
chrV	5240753	5243120	B0238.1	7.1	12.3	11	3.6	2.3	1.7	2.1	1.8	1.1	1.4	3.1	3.2	3.9	7	5.2	1.9	1.4	2.2	1.5	1.6	1.6	4.6	5.4	4.9	2.1	2.1	1.6	8.1	4.1	2.8	5.1	4.8	4.3	3.2	5.5	3.9	3.6	4.6	4.8	2.4	2.7	6	5.2	6.4	3.6
chrV	5274057	5275546	B0238.10	96.9	81.7	105.4	115.6	124.6	104.8	116.5	114.2	97.3	109.3	130.6	113.9	124.3	116.2	126	97.7	104.4	95.5	104.5	108.8	101.3	114.8	128	116.3	105.7	99.2	100	132.1	98.8	161.9	168.4	118.1	107.5	109	125.6	255.4	279.2	248.8	212.4	167.1	172	103	134.7	233.3	180.6
chrV	5269466	5270728	B0238.11	62.9	26.7	83.3	46.3	100.1	95.9	96.1	114.9	106.7	107.8	60	55.8	52.4	59	55.1	345	419.8	45.5	80.1	68.5	84.3	45.8	41.4	40.1	363.5	413.2	81	54.2	42.9	341.6	226.2	50.6	52.6	61.3	56.3	233.4	185	228.8	178.8	260.9	299.5	66.3	82.3	216.2	273.7
chrV	5267805	5268807	B0238.12	6.5	7.3	5.1	6.4	4.3	4.9	5.8	6.6	3.6	5.7	8.7	9.4	7.3	14.8	8.7	0	0	5.2	2.4	3.6	4.2	68.9	50.5	60.7	0.2	0.2	2.8	103.1	22.3	1.3	11.3	33.1	12.3	27.6	21.7	1.3	2.1	1.4	3.9	0.5	3.1	8.8	6.6	9.4	5.9
chrV	5243712	5248024	B0238.13	0.6	1.2	0.7	0.5	0.2	0.2	0.1	0.1	0	0.2	0.4	0.3	0.5	0.6	0.5	0.6	0.4	0.3	0.2	0.2	0.1	0.4	0.5	0.7	0.6	0.4	0.3	0.8	0.3	0.5	0.6	0.7	0.3	0.3	0.7	0.5	0.3	0.6	0.6	0.3	0.4	0.7	0.8	0.9	0.5
chrV	5240172	5240435	B0238.15	0	0	0	0	6	5.8	3.4	6.8	5.2	6.6	1.2	0	0	0	0	26.6	33.9	0	3.3	5.3	1.4	0	0	0	39.8	31.5	4.4	0	0	22	11	0	1.4	0	0	17.5	10.2	0.9	3.6	6.4	14.3	0	0	13	26.6
chrV	5250587	5252100	B0238.3	0	0	0	0	0	0	0	0	0	0.1	0	0	0	0	0	0	0	0	0	0	0	0	0	0	0	0	0	0	0.2	0.1	0	0	0	0	0	0	0	0	0	0	0.1	0.6	0.1	0.1	0.1
chrV	5256125	5257407	B0238.5	0	0.1	0.2	0	0	0	0	0.1	0	0	0	0	0	0.1	0	0	0	0	0	0	0	0.4	0.2	0.3	0	0	0	0.6	0	0	0	0	0.1	0	0	0	0	0	0	0	0	0.2	0	0	0
chrV	5258019	5259532	B0238.6	0.5	0.4	0.2	0	0	0	0.1	0	0.1	0	0.1	0.1	0.1	0.1	0.1	0	0	0.1	0	0	0	0	0	0	0.1	0	0	0	0.3	0.1	0.1	0.4	0	0	0	0	0	0.1	0.2	0	0	0	0	0.1	0
chrV	5260315	5263083	B0238.7	0	0	0	0	0	0	0	0	0	0	0	0	0	0	0	0	0	0	0	0	0	0	0	0	0	0	0	0	0	0	0	0	0	0	0	0.1	0	0	0	0	0	0.2	0	0.1	0
chrV	5263934	5265760	B0238.8	0.3	0.5	0.4	0.1	0.1	0.1	0	0	0	0	0.2	0	0.1	0.1	0.2	0.3	0	0	0	0	0	0	0.1	0.3	0	0.1	0.1	0.2	0.3	0.2	0.3	0	0	0.2	0	0.3	0.5	0.3	0.5	0.1	0.1	0	0	0.7	0.4
chrV	5275532	5278290	B0238.9	5.6	1.7	3.8	2.1	43.1	43.6	43.9	48.8	43	47	4.7	4.6	3	2.3	1.5	35.4	33.6	1.4	41.2	37.6	42.2	55.3	52.9	48.6	40	35.2	38.6	50.1	2.6	23.2	23.1	2.4	3	2.9	2.1	16.4	9.7	6.9	10.3	15.5	20	1	2.3	9.2	11.6
chrV	11727879	11730142	B0240.1	2.4	4.8	3.5	2	1.6	0.8	0.8	0.9	0.9	1.1	3	3.2	3.1	3.3	2.1	0	0.2	1	0.5	0.7	0.4	2.6	0.9	1.3	0	0.1	0.6	3.2	1.6	1.4	2.3	4.9	2.3	2.1	3.2	0.8	1.1	2.7	3.2	1.2	1.7	1.3	2.7	1.8	1.3
chrV	11733525	11736950	B0240.2	0.1	0.1	0.2	0.1	0.2	0.1	0.4	0.2	0.2	0.2	0.1	0	0.2	0.1	0	0.3	0.2	0	0.1	0.4	0.2	5.8	6.3	5.3	0.2	0.2	0.1	7.9	0	0	0.1	0.1	0	0.1	0.1	0.1	0	0	0	0.1	0.1	0	0.1	0	0.1
chrV	11718070	11725634	B0240.3	0.3	0.1	0.5	0.3	0.1	0	0	0.1	0	0.1	0.9	0.3	0.3	0.9	0.4	0	0.1	0.3	0.1	0.1	0	0.2	0.2	0.1	0	0	0	0.2	0.4	0.7	1.1	0	0.5	0.4	0.6	1.5	2.3	3.1	3.1	0.6	1.4	0.8	0.8	1.3	1.2
chrV	11730973	11733461	B0240.4	17.6	10.5	17.1	15.4	58.3	61.7	53.9	59.1	62.1	64	27	26.2	24	16.2	13.3	162.9	138.7	12.7	42.6	34.5	42.4	12.7	10.5	10.2	151.3	141.5	39.7	20.2	16.2	89.9	54.1	16.6	17.9	18.3	15.9	55.3	32	37.1	38.3	72.7	58.5	19.8	17.8	31.5	43.9
chrIII	5733950	5737469	B0244.10	1	0.4	1.1	0.2	0.9	0.7	0.6	0.9	0.8	0.9	1.1	0.7	0.7	0.6	0.8	0	0.1	0.2	0.6	0.7	0.6	0.4	0.5	0.5	0.1	0.1	0.5	0.7	0.5	0.4	1	0.3	0.4	0.9	1.1	0.6	1.4	1	0.9	0.7	0.5	1.4	1.7	1.1	1
chrIII	5767836	5768620	B0244.11	0	0	0	0	0	0	0	0	0	0	0	0	0	0	0.1	0	0	0	0	0	0	0	0	0	0	0	0	0	0	0	0	0	0	0	0	0.2	0	0	0.3	0	0.1	0	0	0.1	0.3
chrIII	5755492	5765769	B0244.2	119.4	165.1	125.6	136.4	26	13.8	28.8	18.4	14.2	19.5	71.4	70.6	68.2	217.5	112.3	4.2	5.6	73.8	14.3	26.5	14.9	87	78	62.9	4	4.6	14.5	111.4	109.3	19.4	75.3	119.2	87.1	71.9	88.1	44.3	57.4	71	86.9	20.1	38.1	115.5	78.4	85.5	55.8
chrIII	5747438	5751562	B0244.4	0.2	0.2	0.5	0.1	0.3	0.5	0.1	0.1	0.4	0.3	0.1	0	0.3	0.2	0.1	0	0	0	0.1	0.1	0.3	0.1	0	0	0	0	0	0	1.7	1.4	0.2	1.9	1.8	0.5	0.5	0.3	0	0.3	0.6	0.1	1.8	0.5	4.7	0.2	0.2
chrIII	5744832	5747149	B0244.5	0.8	0.4	0.6	0.3	0.4	0.3	0.2	0.2	0.1	0.2	0.8	0.6	0.4	0.4	0.7	0	0	0.2	0.1	0.1	0.1	0.1	0	0	0	0	0.2	0.2	0	0	1.2	0	0	0.8	0.6	0.2	0.3	0.6	1.3	0.1	0	2.6	0	1.3	0.6
chrIII	5737961	5744774	B0244.6	0.4	0.2	0.4	0.2	0.4	0.4	0.3	0.4	0.4	0.4	0.5	0.3	0.6	0.2	0.2	0	0	0	0.3	0.1	0.2	0.1	0.1	0.1	0	0	0.3	0.3	0	0	0.6	0	0	0.3	0.4	0.4	0.2	0.3	0.4	0.2	0	0.5	0	0.6	0.3
chrIII	5731454	5732808	B0244.7	0.3	0	0	0.2	0.2	0.2	0.1	0.1	0.4	0.1	0.1	0.2	0.6	0.2	0.5	0	0	0	0.1	0.1	0	0	0.1	0.3	0	0	0	0.3	0	0.3	0.2	0.4	0.1	0.1	0.3	0.1	0.1	0.6	0.2	0.4	0.2	0	0.2	0.2	0.1
chrIII	5728131	5730348	B0244.8	1.7	0.5	1.4	1.1	236.1	304.5	224.7	287.5	284.1	301.2	2	2.1	1.2	0.8	0.6	6.1	3.9	0.7	260.6	181.4	262.1	6.3	16.6	11.2	6.3	6.4	254.2	7.2	0.9	5.1	8.4	2	0.8	1.6	1.1	2.9	2.4	1.9	2.4	3.1	3	1	1.2	2.1	2.4
chrIII	5730073	5730965	B0244.9	0	0	0	0	3.5	1.3	4.4	2.6	2.4	2.9	0.2	0.2	0	0	0	0	0	0	1.1	5.3	2	59.4	44.7	51.2	0	0	1.8	78.7	0	0	0.1	0	0	0.3	0	0	0	0	0	0	0	0.3	0	0.1	0
chrV	20479655	20480815	B0250.1	4499.9	5140.1	3874	6952.5	4142.4	5167.4	5140.4	4886.4	5230.9	4872.5	6594.9	6388.3	8176.7	6489.1	7519.5	982.8	1411.9	6742	5383.2	7454.9	5535.9	4271.8	3330.1	3809	1044.6	1328.7	5605.4	3701.8	7883.8	1464.8	1488.3	7834.3	7577	7625.4	7531.4	2375.6	2787.3	2166.7	1750.1	2214.4	1897.4	5995.5	8746.3	2134	2094.4
chrV	20487613	20489171	B0250.10	0	0	0	0	0	0	0	0	0	0	0	0	0	0	0	0	0	0	0	0	0	0	0	0	0	0	0	0	0	0	0	0	0	0	0	0	0	0	0	0	0	0	0	0	0
chrV	20476716	20479058	B0250.2	5	7.2	5.9	6.4	1.5	0.8	1.1	1	0.6	0.8	3.5	3.4	3.6	6.8	4.6	2.5	1.6	3.9	0.4	1.2	0.8	4.3	3.3	3.1	1	1.6	0.6	3.7	3.9	6.4	13.9	3.7	3.3	3.4	5.2	11.8	16.6	16.1	14.4	9.8	6.9	4.7	5.8	14	9.5
chrV	20458622	20464455	B0250.4	2.3	1.9	2.8	1.6	0.7	0.6	0.9	1.1	1	1.2	1.6	1.6	1.6	2.4	1.5	6.9	7.1	1.3	0.6	1.1	0.6	0.6	0.5	1	6.1	7.6	0.6	0.7	2.3	13.9	13.7	1.6	1.6	1.5	1.6	16	14.8	21.6	21	18.4	14.2	2.5	1.6	18	16.7
chrV	20493892	20497315	B0250.5	86.1	59.2	88.8	89.5	75.1	83.3	79.6	86.1	84.9	82.6	100.8	96.4	109.3	100.9	114.8	84.5	82.2	97	109.7	94.7	91.2	107.5	115.8	96.3	86.8	84.4	82	93.3	120.6	63.7	50.6	98.7	103	77.9	89.4	62.3	48.3	41.7	48	48.6	44.5	58.2	67.6	57.9	55.4
chrV	20490739	20492454	B0250.6	0	0	0	0	0	0	0	0	0	0	0	0	0	0	0	0	0	0	0	0	0	0	0	0	0	0	0	0	0	0	0	0	0	0	0	0	0	0	0	0.1	0	0	0	0	0
chrV	20469671	20470454	B0250.8	0	0.1	0	0.2	0.4	0.4	0.9	0.7	1	1	0.5	0.2	0.3	0.2	0.1	0	0	0	0.3	1	1.1	0.2	0.7	0.9	0.1	0.1	0.8	1.5	0	0.2	0.8	1.2	0	0.1	0.1	0.2	0.2	0.2	0.3	0.2	0.1	0.2	0.1	0.5	1.2
chrV	20480760	20485354	B0250.9	5	4.9	5.1	4.8	1.6	1.1	1.7	2.4	1.9	1.9	6.1	8.2	8.2	9.5	6.7	1.7	3	3.3	1.3	1.7	1.5	4.4	2.3	2.1	1.6	1.9	1	5.3	7.7	5.5	11.4	8.6	5.8	6.5	6.4	7.9	13	14.2	15.4	6.8	8.1	6.2	7.6	11.6	9.6
chrII	6919686	6923621	B0252.1	1.3	0.2	1.8	0.9	0.5	0.6	0.5	0.9	0.8	0.5	1.6	1.2	1.1	0.9	1.2	0.1	0	0.7	0.5	0.6	0.7	0.5	0.7	0.5	0	0	0.6	1.2	1	0.3	0.6	1.1	1	1.3	1.9	1	0.8	1.3	1.4	0.8	0.8	1	1.3	1	0.6
chrII	6910027	6912653	B0252.2	4.1	4	6.1	3.6	2.6	2	1.9	3.4	3	3.6	5.6	5.5	3.8	3.3	2.1	25.4	33.7	1.9	1.1	2.6	1.8	6.8	5.2	4.5	23.2	27.6	1.4	7.4	7	18.1	14.4	8.3	3.9	2.4	2.6	9.8	6.5	8.8	8.1	11.3	12.7	5.1	3.5	10.2	13
chrII	6902825	6907713	B0252.3	6.7	8.8	7.8	5.8	5.6	3.5	3.6	4.6	3.6	4.6	6.5	6.6	4.2	5.7	4.4	3.8	4.7	2.7	2.9	2.7	3.2	3.1	4.4	3.2	4.7	5.7	3.1	6.4	5.2	2.9	4.4	6.3	5.7	4.5	4.9	1.8	1.7	2.2	5.1	1.4	1.4	3.8	4.4	3.6	3.3
chrII	6912497	6913321	B0252.4	18.1	10.4	9.5	12.2	56.3	66.9	52.1	65.3	55.8	74.2	23.5	20.5	17	13.4	11.7	172.5	177.7	14.7	60.8	44	60.8	27.6	31.3	24.4	171.9	153.4	57.1	32.4	11.1	98.5	93.2	8.4	13.4	17.5	19.2	90.3	94.8	63.9	49.1	73.5	77.6	18.3	16.9	75	95.5
chrII	6916948	6918878	B0252.5	0.2	0.4	0.5	0.4	6.8	1.5	8.2	4.2	2.8	4.2	0.9	0.8	0.6	0.3	0.4	0	0.3	0.2	4.4	7.2	4	90.9	87.6	89.2	0.3	0.2	3.2	86.3	0.5	0	0	0	0.3	0.5	0.5	0	0	0	0	0.1	0	0.2	0.1	0.1	0.1
chrII	6916111	6916923	B0252.8	54.9	19.4	49.2	45.2	11.1	7.9	14	13.1	7.7	10.3	21	27.5	10.8	31.5	31.3	0	2.4	20.7	9.4	20.8	8.9	26.2	39.7	23.8	0.9	0.5	9.1	31.7	66.3	2.3	5.4	30	52.8	45	62.3	6.4	10.3	6.8	4.6	0.7	5	16.9	42.2	6.2	2.4
chrI	5263696	5268387	B0261.1	19.8	14.4	24.6	15.8	29.9	26.2	28.5	29.9	29.6	30.2	17.2	16.6	16.2	17.6	18.1	48.2	41.9	13.2	24.4	24.6	24.7	25	26.1	19.4	47.3	44.5	22.5	32.4	16.8	39.6	37.3	15.7	15.2	16.2	17.2	27.4	24.7	30.1	33	41.7	33.3	17.9	16.4	27.4	29.7
chrI	5245742	5263429	B0261.2	22.6	15.4	28.4	15.7	22.4	22.7	23	26.1	22.8	26.3	19	19.7	18.2	17.2	16.3	50.8	40.2	14	17.6	14.7	18.4	14	15.5	13.6	51	42.1	17.5	20.1	14.3	39.7	33.3	16.8	18.8	17.8	16.1	32.1	27.4	36.3	36.9	39.2	33.4	20.6	17.3	31.6	34.8
chrI	5244285	5245526	B0261.4	60.4	49.9	81.7	68.1	74.2	83.9	82.7	79.4	75.7	81	81.7	73.4	82.4	69	81	67.8	73	82.3	75.9	89.7	78.3	60.9	70.3	58.7	63.9	67	69.4	59.1	70.7	55.5	67.4	57.9	72.5	71.5	72.1	60.6	72.8	56.5	40.7	75.5	52.9	47.6	69.8	65.3	61.4
chrI	5249774	5250440	B0261.5	0.3	0.9	0.9	0	1.9	0.5	1.6	1	0.9	2	0.2	0	0	0.1	0	0	0	0	1.4	3.5	2	34.3	37.3	41.2	0.3	0.1	2.4	24.4	0.3	0.1	0.1	0	0	0	0	0	0	0	0	0	0	0	0	0	0
chrI	5255449	5256926	B0261.6	0	0	0	0	35.6	9.2	45.2	26.8	16.1	19.3	0	0	0.3	0.3	0.1	0.8	0	0.2	18.1	33.5	25.1	346.3	314.5	407.9	0.6	0.8	14.7	323.4	0.3	0.2	0.2	0	0	0	0	0	0.3	0.2	0	0.2	0	0.5	0	0.3	0.2
chrI	5269546	5270937	B0261.7	15.5	6.6	13	11	116	125.7	102.2	129.1	122.5	126.6	22	24.4	21.5	11.5	9.6	103.3	86.4	11.2	85.5	78.9	85.4	22.7	22.7	20.8	103.6	93.9	79.7	29.4	8.4	66.8	56.6	12.5	16.2	16.2	11.6	45.4	31.3	35	45.4	55.2	53.3	3.6	10.9	26.7	37.5
chrI	5271279	5272040	B0261.8	36.2	14.4	61.6	41.8	13.7	10.8	13.2	8.9	10.7	13.1	39.1	39.3	35.2	42.1	61.2	32.3	26.1	39	13.3	18.4	18.1	18.1	18.8	15.9	29.4	28.7	17.8	21.9	44.7	71.4	55.2	23	39.9	43.2	45.6	65.5	103	117.2	71.1	90.5	92.9	44.1	40	82.9	78.9
chrI	5268421	5269466	B0261.9	0	0.2	0.2	0	0.2	0.1	0.6	0.2	0.3	0	0	0	0	0.1	0	0	0.9	0	0.2	0.2	0.2	7.6	9.2	8.1	0	0	0	13.4	0	0	0.2	0	0	0	0	0	0.3	0.2	0	0.1	0.4	0	0.2	0	0.2
chrX	9434392	9436834	B0272.1	3.9	3	6.7	7.9	0.8	0.6	0.8	0.8	0.4	0.8	4.8	5	4.7	8.2	5.8	1.2	0.8	6.4	0.4	0.8	0.4	3.2	3	2.2	0.8	0.8	0.2	3.5	5.4	24.1	35.7	11.2	6.1	5.7	7.2	43.8	46.9	53.6	50.6	26.7	37.5	8	7.4	48.2	33.7
chrX	9440338	9441505	B0272.2	5.4	3.2	7.9	7.7	8.2	9.5	7.4	8.8	9.9	8.7	6.3	8.7	5.4	5.5	6.5	41.5	38.3	9.8	7.3	8	8.4	2.6	3.7	3.4	45	40.6	8	5.6	5.9	34.9	35	2.7	9.7	7.2	7.4	26.1	21.7	16	26.8	37.9	23.1	10.2	5.7	32.8	29.1
chrX	9431365	9432689	B0272.3	87.1	87	71	123.3	59.3	60	61.1	68.4	51.4	66	111.2	112.3	106.9	72.6	87.2	161.3	161	115.4	53	64.9	56.5	73.9	54.7	61.6	176.2	155	48.8	55.5	116.6	161	133.6	95	169.5	130.7	120.2	123.2	102.2	95.4	90.5	131.9	105.8	104.4	55.8	107.6	123.6
chrX	9428371	9430264	B0272.4	36.1	47	53.4	49.9	11.2	7.4	11.4	16.1	5.9	15.5	33.1	29	36.1	27.3	23.7	9.1	15.5	23.5	5.9	7.7	7.4	69.2	15.6	25.2	8.9	12.1	6.8	26.6	29.5	20	54.6	33.4	32.4	24.4	25.6	33.5	38.1	34.2	33.1	25.5	20.8	25.7	18.9	49.4	34.9
chrIV	5493985	5495241	B0273.1	0.4	0.2	0.4	0.3	17.2	4.1	17.2	9.2	7.9	7.9	0.4	0.2	0.3	0.4	0.2	0.4	1.8	0.2	6	17.5	11	142	137.4	147.3	0.4	0.8	7.3	144	1.1	0.5	2.2	0.5	0	0.6	1	1.1	1.4	0.9	0.9	0.6	0.6	0.4	0.6	1.7	1.9
chrIV	5486675	5490322	B0273.2	2	0.7	1.4	1.5	154.7	199	147.3	167.4	168.8	171.8	5.8	4.7	4.1	1.8	1.9	166.8	133.7	1.3	144.8	109	146.1	16.5	20.2	19	167.6	147	138.1	22	2	94.4	71	1.6	2.2	2.7	1.6	55	25.5	22.1	32.8	56.9	58.4	2.7	2.5	31.1	50.2
chrIV	5484036	5486201	B0273.3	2.6	2.1	2.5	2.6	8.1	8.8	8.2	8.6	8.5	8.3	6	5.3	4.3	1.1	1.2	8.3	9.1	1.3	6.7	6	7.6	8.4	6.1	6.8	8.7	7.6	6.1	7.5	2.4	2.8	3.4	3	3.1	2.9	2.3	4.9	2.6	2.1	2.6	2.2	2.8	0.3	1.7	2.8	3.2
chrIV	5495656	5516256	B0273.4	8.7	7.9	7.6	6.7	3.2	1.9	2.9	3	2.1	3.3	6.6	7.1	6	9.5	8	12.5	14.1	6.2	2	3.5	2.2	7.1	8.3	7.3	12.1	12.6	2.4	10.2	7.8	28.2	25.6	9	7.4	7.4	8.5	34.5	31.4	34.1	40.2	21.1	31.8	9.5	9	35.1	27.9
chrIII	7133726	7136401	B0280.1	22.1	13.7	25.3	16.6	22.6	19.7	18.7	22	21.8	25	19.5	19	16	13	13.1	25.2	22.2	14.6	16.4	11.8	18.2	15.2	14	14.4	23.3	21.5	14.4	21.4	14.7	24.2	30	19	18.4	16.5	17.6	20.4	18	19.9	16.7	18.4	22.6	19.9	15.1	27.9	23.2
chrIII	7131971	7133616	B0280.10	3.1	2.2	3.1	2.7	8	8.2	7.2	9.2	8.6	9.8	3.5	4.3	2.5	1.7	2.1	10	8.7	1.5	6.7	5.2	6	4.7	5	4.5	9.4	9.1	6	5.9	1.9	10.4	8.6	4.3	1.9	2.9	2.1	6.1	6.9	5.7	6.3	7.5	7.6	3.3	2	7.2	9.3
chrIII	7136445	7138216	B0280.11	0	0	0	0	3.9	1	4.5	1.5	1.6	1.9	0.1	0.1	0	0	0	0	0	0	1.5	4.3	1.8	38.9	38.4	39.2	0	0	1.5	41.7	0	0	0	0	0	0.1	0	0.1	0.1	0	0	0	0	0	0	0	0
chrIII	7138620	7144770	B0280.12	3.7	2.4	4.7	2	0.5	0.1	0.4	0.3	0.2	0.5	1.8	1.9	1.5	2.2	1.8	0.2	0.1	0.9	0.1	0.5	0.2	0.8	0.8	0.7	0.2	0.3	0.1	1.4	1.2	0.7	1.3	0.6	1	1.1	1.5	2	2.4	3.3	3.1	0.7	1.3	2.4	1.5	1.7	1.2
chrIII	7128836	7131986	B0280.13	12.3	9.7	17.1	5.8	5.3	3.6	5.2	3.6	3.7	2.9	5.9	5.7	6.8	8.5	9.3	0.1	0.2	6.1	4.4	7.6	3.7	5.2	3.9	4.4	0.2	0.1	3.5	5.8	7.2	1.5	2.7	7.1	6.8	6.4	7.1	3.2	4.5	5.8	6.6	2.2	3.8	7.7	9.4	4.6	4.1
chrIII	7134959	7136065	B0280.17	0.2	0	0.2	0	17.5	5.6	20.4	9.5	8.1	9.9	0	0.1	0	0	0	0.6	0.4	0	7.1	17.7	9.2	180.8	141.6	169.9	0.2	0.1	7.5	221.7	0	0.1	0.2	0	0	0	0	0	0	0	0	0.1	0	0	0	0.2	0
chrIII	7124601	7128320	B0280.2	1.3	1.1	2.2	1	1.2	0.6	0.9	0.8	1	0.6	1.4	1.2	1.1	1.6	1.6	0.1	0	0.8	0.7	1	0.6	0.8	0.9	0.6	0.1	0.2	0.5	1.4	2.1	0.3	0.6	1.3	1.6	0.9	1.5	0.8	0.9	1	1.6	0.3	0.8	1.3	1.8	1.1	0.9
chrIII	7123061	7124270	B0280.3	48.1	39.4	63.5	45.3	79.7	66.7	74.5	60.6	64	62.1	55.9	61.8	65.6	62.9	62.9	41.4	48.8	35.6	67.4	64.8	70.4	31.4	36.2	28.8	41.8	48.9	58.2	53.3	57.5	37.7	31.2	46.7	49.7	42.7	52	36.4	33.2	35.8	30	47.9	37.3	30.7	59	32.1	35.7
chrIII	7108259	7109248	B0280.4	2.9	1.3	2.7	2.7	2.5	1.9	2.8	2.7	2.4	2.5	5.4	4.9	3.2	1.1	2.8	1.9	3.9	3	1.1	1.6	1.1	1.2	1.9	1.8	2.7	3.2	2.1	1.7	3.1	9.4	9.3	3.3	7.4	2.7	2.2	6.7	9.9	11.7	5.6	10.2	11.9	3	4.9	9.5	8.7
chrIII	7102023	7103930	B0280.5	7.4	6.5	8.1	5.9	1083.3	1343.2	1027.1	1279.1	1314.9	1220.4	9.2	11.2	8.9	3.6	2.9	17.9	19.1	2.6	1014.4	833.4	947.7	34	71.5	48.7	18.1	17.9	953.9	38.5	5.3	16.8	71.3	4.2	4.7	7.3	3.8	25.4	20	12.3	20.9	10	6	1.4	3.9	11.4	8.8
chrIII	7110240	7111811	B0280.7	29.5	2.5	16.3	20.8	1.2	0	1.2	0.9	0.1	1.3	16.2	16.9	1.5	4.8	2.4	0	0	16.7	0.2	1.2	0.2	0.1	0.1	0.1	0.1	0	0.3	0	12.1	0.8	3.2	16.3	12.4	12.2	6.6	3.2	4.5	4.8	4.9	0.6	1.7	15.5	8.2	3.4	1.2
chrIII	7112236	7115378	B0280.8	18.2	19.8	23.9	15.3	9.5	6.3	9.4	8.7	6	11.8	17.8	18.6	17.5	16.5	11.4	24.7	26	8.9	5.6	6.1	7.5	7.6	11.2	9.1	23.3	23.4	7.3	12.4	20.9	27.8	27.9	18.5	16.2	11.7	13.9	23.5	23.1	24.9	31	26.7	25.3	12.7	14.6	25	24.3
chrIII	7120841	7122833	B0280.9	42.7	17	63.2	20.9	42.4	41.7	38.7	42.7	43.7	45.4	27.3	26.4	26.5	29.2	22.6	62.5	66.4	24.2	44.2	37.5	35	16.2	15.1	14.4	63.8	67.6	31	16.9	19.4	49	40.1	20.7	24.1	25.4	23.6	40.1	31.8	38.9	36.5	43.9	43.9	18.3	39.4	34.6	37.3
chrII	2313071	2314932	B0281.1	0	0	0	0	0	0	0	0	0	0	0.2	0	0.2	0	0.1	0	0	0	0	0	0	0	0	0	0	0.1	0	0	0	0	0.1	0	0	0	0	0	0	0	0.3	0	0.1	0	0	0.1	0
chrII	2307045	2308356	B0281.3	8.6	3.6	7.9	6.4	6.1	4.4	3.9	6.3	6	5.6	7.6	7.5	5.9	7.6	10.1	0	0	8.1	3.4	4.1	3.5	7.9	7.6	5.8	0.1	0.1	4.9	8.1	7	0.2	2.7	5.1	10.2	10.7	13.4	0.2	0.8	0.7	0.3	0.1	0.5	10.3	10.2	2.3	2.2
chrII	2297851	2298798	B0281.4	0	0	0	0	2	2.3	1.1	1.8	2	2.6	0	0.2	0	0	0	1.6	0	0	2	1.1	1.9	0	0	0.1	1.6	1.3	1.8	0	0	0.2	1.1	0	0	0	0	0.3	0.4	0.1	0	0.6	0.3	0	0	0.1	0.4
chrII	2299844	2300887	B0281.5	0.2	0	0	0.7	5.1	8.3	5.6	9.5	9.2	9.7	0.6	0.1	0.5	0.8	0	386.5	441.5	0.2	4.1	1.3	3.6	0.3	0.5	0.1	390.8	438.9	4.1	0.1	1.6	272.8	210.6	0	2.6	0.4	0.2	134	120.7	140.5	86.5	199	209.3	0	0.9	122	175.8
chrII	2301312	2302234	B0281.6	1.3	1.2	0.2	1	0.1	0.2	0.2	0.6	0.3	0.3	0.5	0.7	0.3	1.9	1	0	0	0.5	0	0.5	0	0.3	0.4	0.5	0.2	0	0	0.3	0.4	0.1	1.4	0	0.4	0.5	0.7	0.2	0.4	0.1	0	0	0.4	1.1	0.5	0.9	0.2
chrII	2311494	2312852	B0281.8	0	0	0	0	0	0	0.1	0	0	0	0.1	0	0	0	0	0	0	0	0	0	0	0	0	0	0	0	0	0	0	0	0.2	0	0	0	0	0	0	0	0	0	0	0.2	0	0.1	0
chrIII	4376474	4379172	B0284.1	1.4	2.6	0.9	2.4	0.4	0.3	1.3	0.3	0.5	0.3	0.5	0.7	0.3	1.2	0.9	0	0	0.2	0.7	0.7	0.1	1.9	0.8	1.3	0	0	0.2	2.2	2.3	1.9	11.7	2	0.4	1.1	0.9	0.5	1.5	1.3	1.6	1	2.8	1.5	1.1	10.7	9.1
chrIII	4381710	4384113	B0284.2	0.6	0.8	0.1	1.7	0	0.1	0.7	0.2	0.1	0.1	0	0.1	0.1	0.5	0.2	0.7	0.9	0	0	0.1	0.1	0.4	0.1	0.1	0.8	1.2	0.1	0.7	1.6	1.4	6.2	2.2	0.4	0.8	0.8	0.6	1.3	1.5	1.4	0.9	2.1	0.6	0.5	6.7	5.7
chrIII	4379339	4381013	B0284.3	3.5	3.4	3.9	5.2	2.7	3.4	3.4	2.9	2.8	3.3	3.3	3	3.4	4.2	5	41.1	36.7	4.2	2.9	4.6	3.5	3.2	2.8	4.6	38.8	40.2	3.8	2.6	11.9	93	72.4	7.2	6.6	7.9	11	54.6	105	49.9	46.8	87	64.6	11.8	7.6	76.3	71.4
chrIII	4384758	4387729	B0284.4	0.1	0	0.1	0.2	0	0	0.1	0.1	0	0	0.1	0	0.1	0	0	0	0	0	0	0.1	0	0	0	0	0	0	0	0	0.1	0	1.5	0.3	0.1	0.5	0.2	0	0	0.1	0.3	0	0.1	0.2	0	1.2	1.2
chrIII	4333368	4340455	B0285.1	37.8	17	46.6	23.1	43.6	49.1	44.5	44.4	47.7	42.5	22.4	21.2	21.7	26.6	25.8	95.7	84.5	19.4	44	49.2	43.2	24	22.8	21.5	89.8	86.4	43.9	30.7	19.6	69.8	47	17.9	19.5	20.6	20	57.6	49.8	55.5	52.4	92.1	60.7	31.3	31.7	48.3	55.6
chrIII	4370856	4372792	B0285.10	0.1	0.5	0.1	0.2	0	0.1	0	0.1	0.1	0	0.1	0.1	0.1	0.4	0.1	0	0	0	0.2	0.1	0.2	0.4	0.1	0	0.1	0.1	0.2	0.2	0.3	0.1	0.8	0.3	0.3	0.2	0.2	0.3	0.7	0.7	0.4	0.1	0.6	0.9	0.6	0.8	0.7
chrIII	4341656	4343308	B0285.3	11.4	6.4	11.4	6.2	18.1	19.3	17.7	19.7	18.9	16	9.1	7.2	7.6	5.4	7	48	43.9	8.1	19.8	19	20.3	10.3	9.4	9.3	55.9	48.6	16.9	8.3	5.9	52.1	35.1	9.1	8.3	9	9.5	41.5	37.4	29.6	22.7	58.6	41.3	5.6	6.9	31.5	35.8
chrIII	4343432	4345194	B0285.4	22.8	18.9	27.8	20.2	37.5	37.5	34.5	39.2	35.4	43.2	29.4	30.9	29.7	23.6	23.3	65	62.3	17.5	28.2	21.2	28.4	18.1	15.9	13.9	62.4	58.7	24	20.8	29.1	46.5	38.9	22.5	23.2	25.7	28.8	37.7	26.7	30.2	30.3	30.6	36.9	19.3	20.8	32.6	34.1
chrIII	4345308	4350051	B0285.5	13.4	5.7	19.1	12.1	25.9	22.4	21.7	21.7	25.9	23	11.8	13.6	10.2	9.3	11.8	69.7	67.3	8.1	19	18.4	18	4.7	6.2	4.3	67.7	65.7	17.6	8.7	9.7	48.4	31	6.3	8.3	9.3	8.8	35.9	26.9	39.5	35.3	36.5	46	10.7	10.3	28	36.8
chrIII	4352217	4355860	B0285.6	2	0.8	1.7	0.6	0.4	0.4	0.6	0.3	0.4	0.5	1.3	1.5	1.1	1.3	1.1	0	0	1	0.1	0.2	0.4	1	0.8	0.8	0	0	0.4	1.8	1.2	0.1	0.3	0.8	0.8	1	1.5	0.1	0.2	0.2	0.6	0	0.2	1.3	1.1	0.1	0.5
chrIII	4356510	4364944	B0285.7	9.5	5.2	8.9	11	2.8	2.8	2.5	4.1	3.5	4.8	8.2	8.2	5.7	14.3	11.7	49	61.5	8.2	1.5	2.3	1.2	6.9	4.7	4.1	50.2	58.9	1.3	13	15.9	143.4	121.9	13.5	12.7	9	11.2	97	94	129.7	116.2	178.5	132.6	21.7	16.4	127.4	131.8
chrIII	4365346	4367441	B0285.8	6.4	4.8	8.7	3.5	3.4	2.1	2.1	2.3	1.7	2.9	5.5	6.8	5.7	5.9	5.6	1.1	1.5	2.8	1.6	1.9	1.8	4.8	5.1	4.3	1.3	1.9	1.8	8.5	4.4	4.1	2.8	4.1	5.3	5.2	6.2	2.5	1.8	3.4	3	2.7	3.1	4.1	5.6	4.3	3
chrIII	4367803	4370132	B0285.9	10	8	22.3	5.2	5.8	5.8	5	12.4	11.4	13.1	15.6	13.7	20.7	13.6	7.4	25.7	23.7	3.2	5	7	3.4	11.2	29.8	11.9	25.2	26.3	3.3	106.2	13.6	14.8	22	17.3	15.2	13.6	14.8	5.4	3.1	4.1	5.2	4.9	9.1	6.3	12.3	12.8	11.3
chrII	4378658	4386355	B0286.1	34.4	17.4	39.7	13.6	3.9	3.7	5.9	4.8	3.8	5	10.4	9.2	10.8	19.7	18.6	4	4.4	12.6	4.4	8.2	5.4	24	22.2	20	3.8	3.6	5	21.6	17.1	34.1	37.7	12.5	10.6	10	12.1	54	49.2	55.9	47.5	39.1	48.9	20.2	14	55.8	43.3
chrII	4359085	4368285	B0286.2	7	1.9	5.7	9.6	0.9	0.7	1.1	0.5	0.6	0.6	4.2	5	3	2.8	2.6	0	0	4.9	0.6	0.7	0.5	2.6	1.2	1.3	0	0	0.5	1.6	5.9	1.2	6.8	5.8	3.6	3.8	4	2.9	3.6	4.7	6.1	1.1	3.3	5.5	3.5	7.5	5.4
chrII	4369628	4372572	B0286.3	39.4	37.2	42.5	40.5	35.2	20.4	22.1	11.8	18	15.4	46.3	50.7	16.7	31.9	36.5	0.7	0.2	38.7	21.6	19.7	24.1	13.5	34.2	23.2	1.2	0.8	25.2	53	28.6	3.9	9	19.5	30.2	34.8	35.6	19	16.1	22.3	20.9	5.9	5.6	22.8	18.7	10.4	6.7
chrII	4372743	4376745	B0286.4	129.3	109.6	126.7	114	84	78.5	82.8	89.2	77.4	83.1	113.3	116.7	121.7	133.3	112.8	280.4	297.6	102.1	65.5	73	68.7	79.3	72	62.9	277.1	289.2	59	98.5	112.1	300.8	212.2	113	119.1	123.6	123.6	277.8	263.2	264.1	266.4	277.9	275	104.7	100.4	250.2	262.7
chrII	4379885	4383290	B0286.5	0.5	3.1	0.8	1	4.8	3.6	4.6	4.2	4.1	4.5	1.1	0.4	0.4	1.4	0.2	0	0	0.2	3	7.7	3.5	0.6	0.4	0.2	0.1	0.1	3.1	1.2	0.3	0.4	0.3	1.9	0.3	0.5	0.1	0.6	0.8	0.4	0.3	0.8	0.6	0.2	0.1	0.5	0.2
chrII	4368493	4447363	B0286.6	0	0	0	0.2	0.2	0.1	0.5	0.1	0.1	0.2	0.1	0	0	0.1	0.1	0	0	0	0.2	0.1	0.2	40.4	37.5	42.3	0	0	0.2	68.6	0	0.1	0.5	0	0	0	0	0	0	0	0	0	0	0	0	0.1	0
chrX	1896656	1897337	B0294.1	30.7	14.5	25.4	74.2	7.1	2	5	3.2	1.5	3.8	22.8	19	22.2	156.1	135.8	1	1.2	45.7	6.3	13.4	3	3.1	7.9	5	1.1	1.3	2.3	11.6	91.2	1.8	3.6	84.4	85.9	86.3	120.4	2.2	7.1	4.1	7.8	5.3	1.6	122.8	107.5	4.1	3.7
chrX	1892180	1893266	B0294.3	0	0	0	0	0	0	0	0	0	0	0	0	0	0	0	0	0	0	0	0	0	0	0	0	0	0	0	0	0	0	0	0	0	0	0	0	0	0	0	0	0	0	0	0	0
chrX	17186065	17193219	B0302.1	27.7	16.7	24.1	22.7	17.2	14.8	20	17.6	16.8	16.5	17.1	20.5	14.6	13.9	14.3	49.1	51	18.5	18	24.9	19.9	16	18.4	17.2	53.4	53.5	19.1	22.9	22.7	65.1	49	25	23.4	14.4	14.7	63.5	63.2	53.2	56.4	73.3	78.2	35	38.4	62.1	66
chrX	17178464	17178918	B0302.2	0	0	0	0	0.3	0.2	0	0	0	0	0	0	0	0	0	2	1.3	0	0	0.2	0	0	0	0	1.5	1.2	0	0	0	1.2	1.4	1.4	0	0	0	1.2	0	1.2	0.6	1.6	2.1	0.6	0.3	1.1	1
chrX	17176415	17176703	B0302.4	0	0	0	0	0	0	0	0	0	1.3	0	0	0	0	0	5.3	20.3	0	0	0	0	2	0	0	15.9	11.8	0	0	0	10.2	7.6	0	2.6	1.8	0	2.2	10.5	6.3	9.6	13.6	8.8	0	0	4.7	3.4
chrX	17193223	17195044	B0302.5	59.5	62.5	64.8	46.5	34.6	22.1	46	28.9	32.3	29.9	54.7	44.7	48.1	46.3	45.6	0.7	0.5	33.4	36.4	88.4	34.9	39.6	27	36.1	0.7	0.7	33.3	29.5	59.4	11.2	15.8	50.8	46.4	35.3	36.8	17.7	39.2	43.4	42.6	14.9	32.8	50.6	71.9	25.8	22.3
chrIII	8703225	8710031	B0303.11	15.6	24	27.8	10	10.8	7.6	11.5	7.5	7.3	7.2	11	11.7	15	16.3	11.3	0.5	0.3	5.4	5.6	8.3	6.7	16.8	13.1	13.5	0.3	0.2	6.3	21.1	10.3	1	2.5	12.4	10.3	10.1	14.8	2.6	4.9	5.6	5.9	1.2	2	11.1	14.2	3	2.1
chrIII	8713907	8716103	B0303.14	3.7	2.6	5.3	2.3	1.2	1.3	1.1	1.4	1.7	2	1.7	1.3	1.9	2.3	2.1	33.4	37.3	2	1.7	1.2	1.3	1.5	0.9	0.8	34.5	31.8	1.5	1.4	1.7	15.7	15.2	2.7	1.6	2.1	2.3	8.6	3.8	5.4	5	10.8	11.4	3.7	2.9	6.3	8.3
chrIII	8717560	8718486	B0303.15	69.2	33.9	100.3	79.1	88.3	76.3	80.6	79.3	78.8	80.8	78.2	70.4	70.4	79	97.9	45.8	54.1	88.8	64.6	76.5	63.1	46	41.2	32.8	55.6	52.9	61.2	40.2	73.6	57.9	70.3	78	94.3	94.9	97.2	61.6	78.4	80.1	68.4	68.1	60.8	70	86.6	60.4	56.7
chrIII	8705029	8706266	B0303.16	0.3	0.3	0.2	0.2	0.1	0	0.1	0.1	0.1	0.1	0.1	0	0.1	0.1	0.2	0	0	0	0.1	0	0	0.2	0	0	0.1	0	0.1	0.3	0.7	0	0	0	0.4	0.5	0.1	0	0	0	0.2	0	0	0.7	0.4	0	0
chrIII	8684726	8686400	B0303.2	14.8	4	17.3	9.3	4.1	2.7	2.5	2.8	2.3	3.6	11	10.4	7.7	8.3	9	0.8	1	7.4	2.7	3.8	3.5	1.7	3.2	2.7	1	1.4	2.3	4.1	8.4	5.8	15.5	6	9.2	10.1	12.7	14	21.8	18.5	23.2	8.9	9.5	7	6	15.6	12
chrIII	8686036	8688396	B0303.3	122.4	96.5	156.3	134.6	74.7	66.3	75.7	80.7	66.1	90.2	111.1	111.1	86	83.4	78	148.9	123.2	94.6	61	60.5	59.9	195.8	158.2	174.1	151.9	137	50.9	157.5	162.9	139	132.5	131.4	143.5	133.5	130.5	138.8	116.2	114.6	114.7	155.8	105.7	69	48.4	92	92.7
chrIII	8689768	8693393	B0303.4	25.4	21.6	30	21.5	41.8	37.7	37	44.1	36.8	45.2	23.6	22.8	18.5	22.7	17	64.3	52.2	12.2	32.1	32.3	34.6	40.8	41.9	42	64.6	57.2	32.1	47.9	23.3	47.1	46.3	23.1	21.1	17.8	21	37.9	30.8	34.8	39	45.9	45.4	16.9	17.1	34.1	35
chrIII	8693556	8699374	B0303.7	18.9	12.7	23.3	18.7	14.2	12	13.6	14.1	11.4	13.1	14.6	12.6	15.7	16.7	18	21.6	20.8	10.7	12	13.5	12.9	15.7	15.3	14.5	24.3	24.2	10.8	19.8	20.3	20.9	22.5	13	14.5	15.4	18.2	18.7	19.7	24.1	21.3	33.6	20.5	13.5	14.2	20	18.2
chrIII	8699401	8700254	B0303.8	0	0	0	0	0.2	0.4	0.4	0.2	0.6	0.7	0.3	0	0	0.2	0	41.7	28.7	0	0.3	0	0.1	0	0	0	34	32.4	0.1	0.1	0	24.5	17	0	0	0	0	8.4	7.7	4.6	5.9	13.4	10.1	0.2	0	4.8	9.8
chrIII	8700847	8703225	B0303.9	7.2	7.7	10.4	5.5	13.8	14.2	13.6	16.8	15.3	17.6	8.1	8.6	6.8	7.4	6.4	3.7	5.5	4.7	10.3	8.5	10.2	5	5.6	4.6	5.7	5.5	10.2	6.9	7.6	7.4	8.6	8.7	7.8	8.9	7.6	6.9	5.8	9.3	6.8	7.7	7.3	6.9	6.6	8.6	6.3
chrII	4519065	4522434	B0304.1	10.9	7.8	14.8	10	3.1	3.1	2.1	3.2	2.9	3.8	12.8	9.4	11.9	12.3	12.4	31.9	43.4	12.7	2.2	5.2	2.7	3.6	6.5	5.6	34.2	38.6	2	10.6	9	72.5	45.6	12	10.8	15.2	16.1	65.4	69.3	76.5	62.8	76.8	85.4	19.7	20.2	81.4	75.6
chrII	4523611	4524523	B0304.2	6.4	3.2	5.5	5.8	66.9	67.7	54.6	63.2	68.4	57.8	9.9	10	8.7	6.5	6	59.4	42.7	4.1	54.1	55.6	48.1	16.4	18.1	16.9	53.8	53.7	50.1	16.1	8.9	44	28	3.7	4.3	5.7	4.8	31.8	24.3	14.1	20.9	30.8	26	1.3	4.7	13.8	19
chrII	4512207	4522763	B0304.3	0.5	0.5	0.7	1.1	0.1	0	0.1	0	0	0.1	1	1.1	0.7	0.8	0.8	0.2	0.3	0.6	0	0	0	0.1	0.1	0	0.2	0.2	0	0.2	0.8	0.9	1.8	0.6	0.8	0.8	0.9	1.8	1.7	2.4	2.1	1.1	1.7	0.9	0.5	2	1.7
chrII	4522458	4523219	B0304.4	1.4	2.9	2.4	2.8	24.7	19.1	24.5	24.1	22.6	27.7	4.9	5.1	1.5	3.4	1.6	37.9	31.2	0.6	15.3	16.5	18.4	6.1	9.5	7	39.4	34.2	17.2	10.8	4.8	20.8	25.6	4.2	3.3	3.5	2.9	20.5	13.8	12.5	12.8	9.1	15.4	0	2.4	10.3	18.7
chrII	4529632	4531961	B0304.5	0.4	0.1	0.3	0.1	0.1	0.1	0.3	0.3	0.4	0.4	0.2	0	0.1	0.7	0.1	0	0	0.1	0.2	0	0.1	0.1	0.1	0.1	0.3	0	0.3	0	0	0	0.8	0	0.4	0	0.4	0.2	0	0	0	0.1	0	0	0.1	0.3	0.5
chrII	4534738	4537238	B0304.6	0.2	0.2	0.2	0	0.1	0	0.1	0.3	0.1	0.1	0.1	0.1	0.1	0.1	0	1.3	2.3	0	0.1	0	0.1	0.1	0	0.2	1.8	1.7	0	0.1	0	1.5	0.9	0	0	0	0.1	1.4	0.1	1.1	0.9	1.7	1	0.5	0	0.7	1.7
chrII	4541861	4543665	B0304.7	0	0	0.1	0	0	0	0	0	0.1	0.1	0.1	0.1	0	0	0	0.2	0	0	0	0	0	0	0.1	0	0	0	0	0	0	0.1	0.7	0	0	0.1	0	0	0	0	0	0	0	0.3	0	0.3	0.1
chrII	4524630	4527897	B0304.8	0	0.1	0.1	0	0.1	0.2	0	0	0.2	0.2	0.1	0	0.1	0.3	0.2	0.5	0.6	0	0.3	0.2	0.2	0.1	0	0	0.2	0.6	0.2	0	0	0.2	0.6	0.4	0.1	0.2	0.3	0.1	0	0	0.1	0	0.2	0	0	0.1	0.1
chrII	4538984	4540728	B0304.9	0	0.1	0	0	0	0.1	0	0.1	0.1	0	0	0.1	0.1	0.1	0	0	0	0	0	0.2	0	0	0.1	0	0	0	0	0.1	0	0	0	0	0	0	0	0	0.2	0.1	0	0	0	0.1	0	0.1	0
chrX	493236	497214	B0310.1	25.4	15	33.4	17	10.9	5.3	8.9	7.9	7.3	5.3	17.8	17.9	21.5	32.8	25	0.7	0.4	20.3	5	8.7	5.2	13.1	13.8	9.4	0.3	1.4	5.8	13.2	22.6	5.5	10.4	16.3	23.3	22.9	20	11.5	13.7	14.5	19.6	4.1	12	18.1	23.4	14	8.5
chrX	501965	506944	B0310.2	2.9	6.2	5.9	3.7	2.9	3.3	3	3.9	2.5	3.3	5.5	5.7	10.7	7.4	7.3	87.1	98.1	3.3	2.9	3.7	2.6	3.3	3.5	4.8	88.4	96	1.8	6.9	7.5	54.9	24.5	7	5.9	3.2	5.5	31.6	21.2	24	26.9	41.9	39.5	5.5	6.8	26.5	30.2
chrX	510899	514483	B0310.3	4.1	1.9	3.2	7.9	0.3	0.2	0.8	0.8	0.4	0.7	4.7	3.5	3.6	11.9	6.8	0.2	0.5	4.3	0.2	0.8	0.3	15	11	8.1	0.2	0	0.3	11	8	0.2	1	8	5.2	4	5.1	0.2	0	0.1	0.1	0.2	0.2	1.5	2.8	0.5	0.3
chrX	525928	530177	B0310.5	40.2	20.9	44.3	36.1	26.8	18.2	21	16.8	22.3	19.4	38	38.8	35.8	51	50	2.7	2.3	44.1	18.2	21.8	17.2	11.9	22.1	18.4	3.3	2.9	15.7	18.2	29.9	7.8	12.5	36.5	38.2	34.1	45.4	11	12.9	18.4	25.1	4.8	9.9	37.4	42.3	18.5	10.4
chrX	530625	530962	B0310.6	22.1	5.1	19.3	6.7	1.2	1.5	2.6	3.7	1.1	4.5	2.8	7.8	6	3.3	1.3	0	0	5.3	1	8.1	0	0	0.6	0	0	0	0.8	0	1.3	1.6	2.6	0	2.2	4.7	6.5	1.9	10.1	8.1	15.1	0.4	0.4	13.5	5.7	2	4.4
chrV	9654680	9657925	B0331.1	0.2	0.1	0.3	0.2	0	0.1	0.3	0.1	0.1	0	0.1	0	0.1	0.1	0.1	0	0	0	0	0	0.1	1.7	0.3	0.4	0.1	0	0.2	0.7	0.1	0	0.2	0.4	0.1	0.1	0	0.1	0.3	0.2	0.3	0.1	0	0.1	0.2	0.2	0
chrV	9658906	9661590	B0331.2	0.5	0.4	0.6	2.6	0.2	0.1	0.3	0.2	0.1	0.1	1.3	1.5	0.6	1.2	1	0.1	0	1.3	0.1	0.1	0	0.4	0.1	0.1	0.1	0.1	0.1	0.4	1	0.2	0.4	1.2	2.1	2	1.6	0.2	0.2	0	0.1	0.1	0.2	1.1	0.9	0.4	0.1
chrII	11485445	11486710	B0334.1	197.3	597.4	383.3	229.4	216.9	121.5	260	120.3	113	122.9	406.8	342.3	584.5	574.3	509.5	0.6	0	195.4	105.7	153.2	142	353.7	172.4	177.8	0.5	0.9	124.8	230.7	425.5	18.2	91.4	424.6	415.6	404.4	655.4	9.9	38.9	34.2	66	8.2	23.3	406.2	631.9	57.4	47.5
chrII	11518423	11519507	B0334.10	0	0	0	0.7	0.4	0	0.4	0	0.1	0.1	0.2	0	0.2	0	0	0	0	0	0.1	0.2	0.1	7.2	6.7	9.6	0	0	0	6	0	0.1	0.2	0	0	0.1	0	0	0	0	0	0	0	0	0	0.1	0
chrII	11493166	11495250	B0334.11	21.2	16.1	25.5	17.2	36.7	37.3	34.7	38.2	35.4	39.7	14.7	15.2	14.5	17	17.8	66.9	57.9	12.9	33.1	27.3	32.3	16.1	14.5	11.5	63.2	55.1	31.8	15.2	18.6	33.9	31.6	19.3	16.9	16.4	20.5	24.9	15.4	16.7	18	27.6	22	16.6	17.1	19.6	22.6
chrII	11488222	11489555	B0334.13	66.3	10.9	62.4	4.7	2.8	1.4	4.9	6.9	3.3	5.4	7.8	5.6	9.7	7.7	2.1	0	0	7.9	1.3	6.8	1.4	1.7	0.6	0.8	0	0	1.9	0.9	11.9	6.9	16.5	13.3	13.8	17	6.3	7.5	66	46.6	54	1.2	12.5	31.2	8.2	20.1	14.1
chrII	11496713	11499556	B0334.15	103.7	58	79	125	193.6	193.3	193.7	194.6	195.3	192.2	135.3	110.3	126.8	102.3	139.7	329.6	335.5	82.1	171.7	189.4	178.3	124.5	126.9	120.6	328.7	348.5	170.5	162	119.4	387.9	233.3	98.8	101	143.3	143.3	265.6	346.6	318.6	280.3	507.3	335.9	132.3	120.3	279.6	301.7
chrII	11483136	11485295	B0334.2	3.4	16.8	7.2	2.4	6.3	6	7.5	7.1	5.6	8.4	1.7	3	3.3	5.1	3	0.3	0	1.3	3.7	4.8	3.5	14	7.7	6.9	0.5	0.3	4.4	16.5	2.7	0.3	0.8	2.7	1.8	2.6	2	0.1	0.5	0.8	1.4	0.1	0.4	1.8	2.1	0.4	0.4
chrII	11489540	11492957	B0334.3	90.1	108.5	115.6	121.4	64.4	62.7	79.8	74.5	51.4	72.6	75.9	77.4	104.1	84.9	88	49.9	42.9	76.4	52.9	66.4	67.6	181.9	96.2	107.1	49.2	45.4	61.9	129.4	97.9	62.1	98	97.5	76.5	81.8	87.5	63.8	58.3	69.4	79.4	61.2	55.8	70.4	62.7	101.2	74.2
chrII	11495627	11496605	B0334.4	19.1	17.9	25.4	18	68.9	71.5	58.2	72.5	66.5	83.4	25.6	24.1	18	19.1	17.7	134.9	137.1	10.2	54.8	46.4	54.4	34.7	34.2	33.8	139.2	124.5	45.8	39.6	24.3	114.1	119.6	20.9	21.1	22.6	24.3	78.4	73.3	93.2	81.6	85.9	105.1	30.2	22.2	88.3	95.3
chrII	11496713	11499559	B0334.5	0	0	2.2	0.8	0	5.9	0	0	0	7.8	0	14.9	0	0	0	5	0	24.1	0	0	0	0	0	5.4	0	0	0	8.7	0.1	2.7	4.1	7.9	15.7	0	0	10.1	0	11.8	0.1	0.2	6.7	0	14.4	0	0
chrII	11510610	11513826	B0334.6	4.7	1.3	3.8	9.9	0.5	0	0.3	0.5	0.4	0.4	9.9	8.6	3.7	2.7	2.7	0.7	0.4	3.7	0.4	0.9	0.4	0.3	0.3	0.2	0.4	0.3	0.3	0.4	5.6	2.3	4.8	6.2	4.1	4.6	3.2	6.4	7.1	9.3	9	3.4	5.2	6.4	4.4	6.5	4.7
chrII	11515010	11518090	B0334.7	0.4	0.1	0.1	0	0	0.1	0	0	0.1	0	0.3	0.4	0	0.2	0.2	0	0	0.3	0	0	0.1	0.1	0.1	0.1	0.1	0	0	0.1	0.1	0	0.1	0.4	0.1	0.2	0.3	0	0	0	0.2	0	0	0.3	0.4	0	0
chrII	11519434	11526998	B0334.8	8.1	5.2	7.8	6	18.1	19	16	19.4	18.4	19.8	7.6	7.6	5	5.2	4.2	30.5	24.3	4.6	14.4	10.6	13.9	9.8	8.1	7.5	28.5	24.9	13.8	10.2	5.2	18.6	15.3	5.6	6.8	6.3	5.1	13.7	9.3	10.6	12.5	11.8	15.4	7.7	6	10.5	11.8
chrIII	5722803	5727068	B0336.1	7.9	6.5	10	5.2	30.9	30.3	27.1	31	30.7	33	7.3	6.4	7	5.6	5	49	48.6	3.6	23	21.1	21.6	8.4	9	8.1	48.4	47.9	21	10.2	6	52.7	39.7	7.8	5.6	5.1	6	31.6	21	32.1	31.6	32.7	42.4	6.8	6.6	35.4	37.3
chrIII	5705467	5706281	B0336.10	2876.2	4415.2	3390.6	4781.6	3298.2	3304.2	3169.9	3428.8	3185	3722.4	4171.9	4380.9	4192.5	4205.5	4224.3	1017.9	1387.8	3490.2	3322.1	3144.5	3103.3	2499.9	2312.2	2402.4	1035.6	1290.8	2836.8	2160.3	4885.9	1176.5	1503.5	4977.1	5291.6	5713	5647.5	2315	3277.8	1453.9	1403.4	922.3	1227.3	2930.1	4326.6	1834.8	1447.9
chrIII	5706691	5709284	B0336.11	22.8	12.6	26.6	25.2	5.5	2.4	5.7	3.7	2.5	4.2	25.7	27	24	30.6	28	0	0.3	21.4	2.5	5.4	2.9	13.8	12.8	11.6	0.1	0.2	3	20	25.9	5.4	11.2	26.5	23.4	24.2	24.8	17.6	18.8	24.7	17.8	8.8	13.3	23.7	19.8	17.4	12.1
chrIII	5710016	5710464	B0336.12	0	0	0	0	0	0	0	0	0	0	0	0	0	0	0	0	0	0	0	1.1	0	0	0.7	0.5	0	0	0	0	1.4	0	0	0	0	0	0	0	0	0	0	0	0	0	0	0	0
chrIII	5693990	5695178	B0336.13	6.3	3.9	7.1	7	39.8	36.6	31.1	34.4	33.6	38.2	8	7.3	7.2	6.4	6	64.6	68.8	3.6	31.3	24.7	27	12.8	12.1	12.3	71.9	70.9	24	17	8.5	58.3	39.9	7.4	6.4	5.1	7.4	45.6	39	34.4	31.9	46.3	46.1	5.7	7.7	28.1	36.3
chrIII	5716067	5717541	B0336.2	980.8	227.1	1185	404.4	303.5	235.1	285.9	248.3	264.5	251.8	431.7	368.6	337.6	352.6	340.8	687.8	698.2	303.8	216.3	277.2	210.3	339.2	326.6	361.1	689.5	707.2	199.9	352.3	450.2	760.6	477.6	362.5	372.8	368.6	381.4	628.3	642.4	707.4	720.1	969.7	587	610.3	414	633.1	740
chrIII	5711502	5714801	B0336.3	55.4	27	53.8	39.5	84.9	89.9	81.1	96.6	93.3	91.6	45	43	39.3	45.9	37.2	173.1	153.4	34.9	79.4	71.7	74.1	53.7	54.7	50.7	169.1	162.2	73.6	72	36.4	131	105.6	41.9	43.3	44.6	40	106.5	90.8	105.2	103.8	144.5	126.1	49.3	46.7	104.1	122.4
chrIII	5698389	5702257	B0336.4	8.2	4.1	9.6	7.3	4.4	4.6	4.2	4.7	4.7	4.4	8.1	7.5	6.4	5.1	6.6	16.7	11.6	3.9	2.8	3.4	3.4	3.5	3.1	3	15.1	14.6	3.8	6	7.2	22.1	15	6.6	5.8	7.2	5.9	16.5	16	24.3	21.7	18.3	22.1	7.6	6.4	17.9	17.4
chrIII	5692874	5693893	B0336.5	12.9	7.8	11.7	7.3	46.3	55.5	43.9	50.5	45.2	47.4	11.9	10.1	8	7.8	7.2	109.8	85.4	7.5	50.2	44.7	54.1	18.7	16.9	15.1	96.5	92.5	49.5	20.2	11	72.9	36.7	10	7.1	10.5	11.3	53.4	35.1	28.7	29.4	55.4	46.3	7.1	9.6	27.7	34.8
chrIII	5690061	5692695	B0336.6	15.4	11	19.6	10.8	70.6	78.3	65.4	80.1	70.8	83.1	19.7	18.6	13.8	14.8	12.8	55.8	60	10.2	66.7	51.5	67.7	22	22.8	22.4	53.6	58.2	57.6	26.2	16.7	71.8	61.6	18.6	16.4	17.5	17.6	54.2	43.8	51.8	44.6	54.3	60.6	13.5	16.3	50.1	47.9
chrIII	5694689	5697320	B0336.7	9.1	5.4	9.9	6.1	21.8	21.4	19.2	22.6	22.4	25.9	10.1	9.7	7.4	5.6	5.2	33.9	30.9	4.4	16.8	15	17.6	8.9	9	9.1	32.4	30.2	16.8	12.5	7.2	24.7	21.1	8.6	6.1	6	6.3	18.5	14.1	19.1	17.8	22.2	20.8	5.7	7.4	15	14.9
chrIII	5697430	5697964	B0336.8	18.6	26.8	28.2	34.2	135	123.4	121.3	153.3	139	139.5	31.6	27.5	43.2	30.9	27.6	127.1	141.6	21.7	105	96.5	92.2	49	44.3	41.8	148.5	147	83.5	54.7	44.4	155.8	123.4	31	26.7	31.8	44.5	130	177.7	111.8	106.1	176.6	111.6	25.5	23.2	109.8	124.1
chrIII	5702209	5705421	B0336.9	13.1	11.6	14.9	8.6	22.7	25.8	23.7	30	24.5	27.1	14.5	12.5	10.8	14.5	15.2	36.4	34.7	11.4	23.6	20.5	24.5	11.8	14.4	12	36.7	34.3	21.8	15.1	9.4	29.6	20	6.6	13.6	16.6	12.5	26.1	15.9	23.3	20.4	26.9	28.3	15.8	17.4	17.6	20.9
chrX	1576629	1590890	B0344.2	42	9.3	20.8	59.1	2.4	0.9	3	2.8	1.6	2.3	41	37.8	9.4	17.1	15.5	0.8	0.5	56.2	1	5.4	0.7	0.2	0.7	0.4	0.4	0.2	0.8	0.6	38.6	14.6	20.6	30.9	32.5	27.9	13.5	43.8	56.3	61.2	60	14.6	29.3	89.9	30.8	39.5	35.7
chrV	48921	49619	B0348.1	0	0	0	0	0	0	0	1	0	0	0	0	0	0	0.9	0	0	0	0	0	0	0	0.8	0	0	0	0	1	0	0.7	1.7	0	0	0	0	0	0	0	0	0	0	0	0	3.2	0.9
chrV	45462	46923	B0348.2	1.1	4.3	1.7	1.6	1.9	0.8	2.2	1.2	1.9	2.3	2.3	3.2	0	3.9	3.9	0	0	3.5	1.3	0.4	0.4	2.1	4.2	7.8	0	0	0	4.6	21	3.6	28.6	21.8	11.1	15	42.6	4.8	12.2	2.8	6.9	1.5	8.5	4.5	11.6	35	19.5
chrV	20824	43971	B0348.4	37.3	57.8	40.5	27.1	14.6	11.5	14.1	15.9	14.5	17.9	28.1	29.6	31.6	40.7	33.6	7.8	5.6	26.6	11.9	13.9	12.6	23.3	24.9	19.2	6.8	5.9	11.8	30.5	25.5	13.6	51	28.3	31.9	28.8	28.2	34.2	41.3	41.8	49.1	21.8	22.1	69.3	27.4	64.5	47.1
chrV	5689	6511	B0348.5	7.2	1	1.3	13.9	0.8	0.2	0.5	1	0.5	0.6	8.1	9.7	1.4	3	1.4	0.4	0	6.8	0.3	0.5	0.6	0.3	0.4	0.5	0.7	0.4	0	0.6	8.6	2.2	6.2	9.9	8.5	4.6	3.9	7.3	6.6	6.3	10.2	2.1	5	21.2	4.4	11.7	6
chrV	6588	7822	B0348.6	68.1	45.2	65.6	62.5	273.4	340.2	285.6	320.9	313	323.8	97.1	87	89.1	57.7	64.1	187.1	198.9	52.3	268.9	255.7	272.2	203.7	208.5	203.7	183.3	185.8	266.4	207.5	59.2	126.3	150.5	63.3	73.3	81.9	69.2	112.1	80.3	73.9	62.3	132.8	92.6	109.4	72.3	139	154
chrIV	5966643	6004847	B0350.2	130.6	115.1	152.9	120.1	50.9	34.4	47.9	37.3	35.7	40.8	98.5	102.4	106.9	162.2	145.9	59.9	71	110.4	34.7	48.4	36.3	67	70.1	61.1	62.5	64.5	35.8	80.9	102.9	232.4	294.3	103	123.8	112.8	123.9	308.9	318.4	372.8	327.6	290.9	324	197.2	176.9	430.6	350.7
chrIV	5965469	5966029	B0350.3	0	0	0	0	0	0	0	0	0	0	0	0	0	0	0	0	0	0	0	0	0	0	0	0	0	0	0	0	0	0	0	0	0	0	0	0	0	0	0	0.6	0	0	0	1.3	0
chrIII	557514	572134	B0353.1	14	25.9	7.8	22.3	16.6	11.8	13.3	6.9	11.7	8.7	14.3	12.6	15.2	13.3	17.4	10.8	11.1	11	12.1	15.3	11.3	10.8	17.6	15.1	8.7	11.7	12.9	19	18.3	49.5	40	0.5	13.8	20.4	17.9	81.8	102.2	80.3	89.1	83.1	68.1	30.3	24.4	93.1	71.2
chrIII	7285913	7287541	B0361.10	60.7	28.1	62.1	36.6	50.6	42	41.3	45.6	44.3	48.2	43.8	37.6	26.9	34.5	30.4	95.5	85.5	21.1	25.6	22.5	27.1	42.3	38.8	32.1	94.8	84.1	23.6	49.4	39.9	62.1	56.4	31.3	35.9	34.9	32.4	66	61.9	62.5	82	65.3	50.1	55.3	35.9	57.8	63.1
chrIII	7277539	7281153	B0361.11	0	0	0.1	0.1	0.6	0.1	0.7	0.3	0.2	0.5	0	0.1	0	0	0	0.1	0.2	0.1	0.2	0.4	0.2	6.5	6.1	5.9	0.1	0.1	0.2	9.3	0.1	0.1	0.1	0	0	0	0	0.2	0	0	0.1	0	0.2	0.1	0	0.1	0.1
chrIII	7293567	7308300	B0361.2	10	9.6	19.6	8.6	18.7	18.4	16.3	22.5	18.8	23.3	9.8	13.9	9.5	10.1	9.9	44.5	42.6	7.2	16.4	12.7	15.9	8.3	8.9	7.9	46.1	40.6	14.8	12.1	11.9	24.4	23.5	10.7	8.5	11.6	10.3	20.1	15	21.7	19.9	21.3	22.5	7.8	8.6	18.2	19.6
chrIII	7281339	7283892	B0361.3	15.9	8.7	16.5	14.1	18.1	13.7	16.7	19.2	16.6	21.7	15.7	16.6	12.1	10.7	12	21.7	18.8	11.9	10.7	11.1	11.9	17.5	15.7	16.8	21.9	19.8	10.5	24.7	10	21.6	19.1	12.5	12.5	14.6	13.7	17.6	15.2	21.5	22.2	15.8	18.1	12.2	8.6	16.5	14
chrIII	7258948	7268422	B0361.4	3.2	3.7	4.7	4.3	1.1	0.7	1.2	0.5	0.5	0.9	2.8	2.8	1.4	4.9	3.8	0.2	0	2.9	0.4	0.7	0.2	1.8	1.9	1.4	0.2	0.2	0.4	2.7	4	0.3	3	5.1	2.8	3.8	4.2	0.5	2.3	2.2	4	0.2	1	6	5.6	3.5	1.6
chrIII	7268350	7275334	B0361.5	24.2	32.7	25.1	36.4	34.5	30.9	37.2	39.9	36.8	43.3	41.9	45	34.6	39.1	35.3	15.6	14.4	23.7	28.5	26.7	28.6	42.3	33.1	35.5	14.5	14.5	33.3	46.8	39.7	41.2	41.8	28.4	28.8	22.9	28.9	32	30.4	33.7	31.8	29.9	38.5	17.6	20.1	38.1	29.7
chrIII	7275440	7277210	B0361.6	19.6	8.4	22.9	9.9	29.8	29.1	25.5	31.6	30	33.8	15.3	16.1	10.3	15	10	46.8	49	9.5	22	17.5	20.1	11.6	11.1	11.5	42.7	40.8	17.6	17	8.4	26.8	27.1	5.9	12.5	12	11.8	24	17.9	23.4	26.1	20.3	25.9	12.1	16.7	19.1	21.9
chrIII	7283856	7285819	B0361.7	13.3	13.1	13.6	12.5	19.3	17.3	17.7	19.3	17.4	24.1	15.7	14.2	10.1	12.3	9.8	14.1	8.8	9.4	14.2	13.6	14.3	9.1	7.8	7.5	11.8	10.4	12.7	15.7	8.6	15.7	14.8	9.5	10.2	11.1	10.9	14.1	9.2	16.5	14.1	11.8	13.7	9.3	8.9	10.4	10
chrIII	7287782	7290500	B0361.8	15	13.5	17.8	15.4	33.5	31.1	31.3	33.8	28.7	37.3	19.3	20.8	17.5	15.7	13.2	39	36.7	10.2	20.6	19.6	21.3	27.8	25.5	21.9	41.1	39.9	18.1	36.4	16.4	27.3	36.4	15.9	18.1	16.9	16.8	28.7	20	29.3	32.8	26.6	24.3	15.7	10.6	20.4	20.5
chrIII	7298283	7299579	B0361.9	14.9	25.7	21.2	44.3	11.1	10.4	12.9	6.9	10.3	6.6	15.4	13.5	11.7	28.9	29.9	9.8	7.6	13.8	8.4	10.9	9.2	16.3	9.1	7.9	6.6	5.6	7.7	11.4	19.6	8.7	20.4	15.2	17.5	26.9	29.8	15.9	21.6	28.6	26.6	9.8	14.7	17.1	29.9	17.8	14
chrV	13116487	13120120	B0365.1	11.6	12.3	12.5	26.8	75.4	85.4	69.3	83.3	82.1	88.3	26.4	27.9	24.5	19.5	24.3	3.3	3.1	14.3	60.7	48	62.4	28.2	29	26.7	2.8	2.8	62.2	32.8	23.5	7	18.2	22.4	21.2	16.6	18.1	10.9	9.5	13.3	10.4	13.4	10.4	18.9	13.3	22.9	15.3
chrV	13126391	13129982	B0365.3	457.6	450.4	582.4	486.4	409.7	361.6	397.8	356.9	371.4	363.8	543.3	542	702.9	689.5	679.3	80.3	58.1	453.9	323.5	408.1	328.3	294.5	301.7	267.1	81.3	66.4	326.6	351	724.5	203.5	407.5	706.3	679.2	597.7	644.4	389.7	437.5	485.8	542.7	223	326.5	549.7	860.7	479.3	338.3
chrV	13131912	13134843	B0365.5	12.5	7.9	27.7	47.2	3.4	1.6	2.7	1.8	1.4	2	47.6	53.8	47.1	33.3	44.4	0	0	25	2.1	5.5	1.8	1.1	1.8	1.9	0.1	0	1.8	3.4	42.4	19.1	31.7	33	34.9	33	38.3	50.8	64.8	70.4	51.1	36	35.9	28.2	13.9	38.7	24.8
chrV	13134925	13138071	B0365.6	124.5	33.2	103.4	41	83.9	103.9	72.1	128.7	83.9	124.1	64.3	68.1	85.6	33.4	73	0.2	0	41	71.9	95.4	27.9	31.9	51	60.9	0.1	0.1	28.8	32.3	97.7	2.9	7.5	105.7	118	265.1	235.5	3.2	6.2	6	9.9	1.5	4.4	146.7	71.9	7.3	4.7
chrV	13138965	13150276	B0365.7	0.2	0.1	0.2	0.2	0.1	0.1	0.1	0.1	0.1	0.1	0.2	0.1	0.1	0.2	0.2	0	0	0.1	0.1	0.1	0	0	0	0	0	0	0.1	0.1	0.1	0.1	0.3	0.4	0.1	0.1	0.2	0.2	0.1	0.3	0.5	0	0.2	0.3	0.2	0.4	0.3
chrI	10074957	10077739	B0379.1	40.9	43.2	62.4	37	51.8	35.2	54.5	40.6	40	41.2	39	34.6	40.9	60.3	44.4	1	2.1	25.1	34.1	51	36.4	62.1	70.7	65.1	0.8	1.3	35.9	89.6	49.4	5.3	24.9	46.2	51	49.8	58.8	7.7	20.8	16.9	33.4	3.8	8.7	44.9	64.7	24.4	16.1
chrI	10070911	10071819	B0379.2	0	0	0	0	12.6	3.1	13.5	6.5	4.9	6.9	0	0	0	0.1	0	0.4	0	0	6.7	12.7	9	112.2	116	124.8	0	0	6.1	102.1	0	0	0.1	0	0	0	0	0	0	0	0	0	0	0	0	0	0
chrI	10080140	10086280	B0379.3	13.9	8.1	17.8	10.9	48.8	53.2	43.6	52.6	53.6	51.8	14.4	15.6	14.1	14	13.5	165.9	145.3	10.1	42.8	35.4	42	35.1	35.1	34.9	165.8	153.1	39.8	43.3	12.1	90.3	57.3	10.6	8.9	11.8	10.8	59.3	40.1	50.6	49.6	110.6	72.8	13.7	13.8	42.7	64.5
chrI	10086380	10102001	B0379.4	33	51.7	39.8	31.7	39	36.3	40.3	40.5	34.9	42.3	31	30.8	28.1	38.9	30.5	15.9	16.1	21.1	29.7	38.2	31.7	45.5	44	34.6	15.2	14.4	30.4	47.4	28	16.1	34.5	18.5	29.2	33.2	31.3	22.7	32.7	26.8	51.7	15	17.1	27.7	35.9	32	23
chrI	10097305	10097766	B0379.6	0	0	0.3	0	0	0	0	0	0.3	0	0	0	0	0	0	0	0	0	0	0	0	0	0	0	0	0	0	0	0	0	0.3	0	0	0	0	0.4	0	0	0	0	0	0	0	0	0
chrI	10072570	10074376	B0379.7	0.1	0.1	0	0	20.3	6.7	24.2	13.4	10.1	12.7	0	0.1	0	0.2	0.1	0.2	0	0	11	30.4	12.9	241.7	241.2	270.8	0.2	0.1	11.8	239.8	0	0.1	0.2	0.3	0	0.1	0	0.1	0	0	0	0	0.3	0	0.1	0	0.2
chrV	15585677	15592966	B0391.10	2.7	0.8	2.4	1.2	7.1	8.1	8.9	10.3	10.9	7.9	4.4	3.9	4.1	1.1	1.4	0.2	0.4	0.8	9	7.6	9.3	7.4	7.8	9.1	0.4	0.7	7.5	10.6	0.8	1.6	4.2	0.4	2	1.7	2.1	0.8	0.7	0.6	1.1	2.3	2.5	1.7	1.5	3.6	2.7
chrV	15600340	15602326	B0391.11	0	0.5	0.1	1.2	0.1	0	0	0	0	0.1	0.2	0.3	0.1	1.2	0.9	0	0	0.6	0	0	0	0.1	0	0	0	0	0.1	0.3	0.5	0.5	2.4	3	0.5	1	0.8	0.8	1.2	1	3.1	0.2	0.5	0.6	0.2	2.6	0.9
chrV	15613166	15614949	B0391.12	0	0	0	0	0	0	0	0	0	0	0	0	0	0	0	0	0	0	0	0	0	0	0	0	0	0	0	0	0	0	0	0	0	0	0	0.2	0	0	0	0	0	0	0	0.1	0.1
chrV	15614917	15617592	B0391.3	0	0	0	0	0	0	0.1	0	0	0	0	0	0	0	0	0	0	0	0	0	0	0	0	0	0	0	0	0	0	0	0	0	0	0	0	0	0	0	0	0	0	0	0	0	0
chrV	15610870	15612572	B0391.4	0.1	0	0	0.1	0	0	0	0.1	0	0.1	0.2	0.2	0	0.1	0.1	0	0.2	0	0	0	0.1	0	0	0	0	0	0	0.1	0.1	0.1	0.1	0	0	0	0	0	0	0.1	0.2	0.1	0.1	0	0	0.1	0.1
chrV	15605704	15610361	B0391.5	0.9	0.6	0.4	0.5	1.6	1.9	1.2	1.9	1.2	2.2	0.5	0.6	0.6	1.1	0.6	4.7	3.6	0.3	1.4	1	1.2	0	0.2	0.2	5.6	4.1	0.8	0.5	0.5	8.7	11	0.9	0.3	0.4	0.2	9.2	8.7	9.7	5.1	7.8	8	1	0.9	13.3	8.4
chrV	15602895	15605136	B0391.6	0.8	0.1	0.6	0.3	0	0	0	0	0	0	0.4	0.3	0.3	0.3	0.3	0	0	0.2	0	0	0	0	0	0	0	0	0	0.1	0.6	0.1	0.1	0.5	0.3	0.6	0.3	0.2	0.2	0.1	0.3	0.1	0.1	0	0.4	0.3	0.4
chrV	15593442	15593780	B0391.9	1.4	0.7	0.7	0	0	0	0	0.7	0.6	1.1	0	2.4	0	0	0.2	0	5.8	0	0.5	0.5	0	0	0	0.7	2.3	0	1.7	0.2	0	8.2	2.6	0	0	0.8	0.8	3.4	6.7	4.7	5.5	4.7	7.9	0	0	8.2	9.5
chrIII	4752863	4754048	B0393.1	2663.2	3896.6	3024.4	5609	3773.3	4034.5	3905.1	3953.8	3974.7	4102.2	5538.4	5455.3	6062.1	5059.4	5257.7	647.9	808.4	4440.1	3595.9	3828.6	3332.4	2687	2126.8	2403.5	635.2	751.3	3229.2	2614.6	6281.8	1140.3	1282.9	6464.8	6289.5	6276.6	6053.4	1909.9	2086.7	1714.8	1652.4	1605.2	1422	4517.1	6169.4	1621.4	1261.7
chrIII	4754396	4756984	B0393.2	13	7.3	16	9.7	56	56.1	49.6	55.2	54.8	60.3	14.9	17.6	14.4	9.6	9.6	67.1	53.5	6.5	43.4	37.1	41.9	11.2	13	11.4	67.4	58.6	36.5	15.8	12.6	49.7	35.7	9.6	10.8	13.5	12.1	28.3	17.5	23.1	26.1	23.3	39.4	14.3	13.4	21.6	28.2
chrIII	4757212	4759696	B0393.3	5.6	4	7	6.7	58.4	69.6	48	67.1	60.7	73.8	10.8	11	7.8	5.8	4.5	284.4	253.7	3.4	47	32.4	47.4	9.1	12.1	8.4	285.8	259.2	42.4	10.6	6.6	172.9	89.7	6.9	6.7	7.8	5.9	93.1	48	56.3	64.6	103.9	116.6	7	5.8	49.8	84.9
chrIII	4759706	4763574	B0393.4	0.2	0.1	0.2	0.2	2.5	1	3.6	2.2	1.4	1.3	0.7	0.3	0.1	0.1	0.1	0.9	0.7	0.2	1.6	6.2	1.9	98	93	85.3	1.2	1	1.3	86.3	0.1	0	0.2	0	0	0.1	0.1	0.3	0	0.1	0.1	0.1	0.2	0.4	0	0.1	0.2
chrIII	4765782	4776242	B0393.5	5.6	2.2	3.6	13.2	1.1	0.3	1.4	1.1	0.3	1.2	9.4	11	2.3	4.8	4.3	0.2	0.2	5.9	0.6	1.9	0.5	0.9	0.8	0.6	0.6	0.4	0.3	1.3	7.3	17	22.9	6.8	6.2	5.8	4	33.9	30.9	48.8	40.4	21.2	32.4	13.2	3.4	31.7	23.1
chrIII	4780123	4781946	B0393.6	4.7	1.8	5.3	2.9	71.2	81.4	74.7	70.4	76.5	64.7	7.4	6	5.5	2.6	2.4	95.4	80.5	1.4	63.9	60.9	69.4	16.8	17.6	14.8	93.5	85.4	64.5	22.1	3.4	52.1	29.9	2.3	2.6	3.7	2.9	38.3	16.2	14.9	16.9	37.7	36.3	0.7	2.6	16.7	23.4
chrIII	4776228	4778030	B0393.7	0.9	0.6	0.3	0.4	0.2	0.1	0.4	0.1	0.1	0	0.4	0.8	0.3	0.7	0.4	0	0	0.2	0	0.1	0	0.4	0.4	0.6	0.1	0.1	0.1	1.2	0.2	0	0	0	0.4	0.2	0.1	0	0.3	0.4	0.2	0.1	0.1	1.1	0.5	0	0.1
chrIII	4751842	4752335	B0393.8	13.5	17.6	10.6	20.1	53.6	53.7	47.6	64.2	56.8	82.8	26.2	22.4	23.4	16.4	12.4	49.2	68	9	31.7	31.7	37.7	57.7	50.4	59.6	57.8	64.8	26.9	56.8	24.2	72.4	69.5	30.7	20.4	34	32.3	95.3	77	44.5	42.1	80.7	49.4	17	15.8	73.4	80.3
chrIII	4778354	4780123	B0393.9	6.5	14.9	7.5	11.1	18.8	11.3	15.1	15.5	9.6	14.7	14	13.1	12	17.2	11.5	0	1.2	6.2	10.2	9.6	11.4	23	23.1	20.7	0.8	0.8	9.5	29.8	18.9	4.1	6.9	9.5	14.9	14.4	17	6.4	8	11.6	8.2	2.6	7.1	5	9.8	7.8	5.2
chrX	16017446	16021677	B0395.1	3.1	3.2	4.8	1.8	5.5	3	3.6	2.7	3.7	3	3.2	2.7	6.7	2.8	3.6	0.1	0	1.6	1.4	2.7	2.1	1.1	1.6	1.3	0.1	0.1	2.5	3	3	7.1	4.2	4.3	4.3	2.4	3.8	4.9	5.2	8	6.7	4.5	10.4	1.8	10.1	6.9	5
chrX	16030733	16034744	B0395.2	18.1	8.8	12.9	30.6	0.4	0.3	0.9	0.4	0.4	0.7	29.2	29.2	11.5	13.1	12.4	0	0	20.8	0.1	1.1	0.2	0.6	0.3	0.2	0.1	0.1	0.1	0.6	38.2	14.3	11.5	40.7	34.7	20.1	15	25.3	24.1	34.1	31.9	10.1	31.2	28.3	13.1	15.1	10.3
chrX	16034974	16039442	B0395.3	49.3	55.9	57.6	74.9	33.6	24.5	30.7	38.2	21.9	34.2	54.4	53.2	57.4	56.2	57.9	25.9	28.4	49.8	30.6	37.4	33.9	94.6	62.6	65.1	25.3	26.3	35.2	57.2	85.8	67.6	61.8	78.5	74	45.7	46	59.6	57.2	61.1	52.7	75.2	79.4	35.7	62.4	50.9	49.2
chrV	19565355	19606090	B0399.1	14.4	19.3	13.3	13.6	3.1	1.9	3.1	3.2	3	2.9	8.3	9.9	9.2	18	14	0	0.2	10.2	2.1	4.3	2.5	6.9	6.2	5.7	0.1	0.1	2.2	9	9.7	1.3	5.5	9.3	9.4	11.5	11.6	3.3	7.3	4.8	9.9	1.4	2.9	20.8	19.3	6.6	4.5
chrV	19550985	19555842	B0399.2	15.7	5.5	8.9	20.8	0.9	0	0.2	0.5	0.1	0.6	12	14	0.9	5	1.5	0	0	9.2	0.2	0.5	0.1	0	0.1	0	0	0	0	0	9.3	0.3	0.3	13.4	8	9	3.7	0.9	0.6	0.7	4.5	0.1	0.8	17.1	4.4	0	0.1
chrX	7050583	7055330	B0403.2	3.5	2.8	3.2	1.8	0.5	0.4	0.8	0.4	0.4	0.5	1.9	2	1.8	3	2.1	0.2	0.3	2	0.2	0.6	0.4	2.6	2.5	2.1	0.5	0.4	0.3	3.4	2.6	0.8	2.6	2.7	1.8	1.6	2	2.1	2	2.2	2.7	1.2	1.6	2.7	1.7	2.6	2.2
chrX	7061804	7063286	B0403.3	7	4.9	9.5	3.7	3.2	2.7	2.3	3.4	2.3	4.2	3	4.1	3.1	3.6	2.9	0.3	0	1.8	3.5	2.5	2.9	6.5	10.2	9.1	0.1	0.1	2.8	11.4	3.1	0.1	2.3	1.4	3.4	2.7	4.5	0.6	1	0.9	1.4	0.3	0.5	5.7	2.8	3.5	2
chrX	7066300	7068519	B0403.4	248.9	127.6	267.1	303.8	145.4	142.2	126.3	122.2	122.9	122.2	344.6	325.6	371.9	250.4	363.9	456.6	555.8	290.4	124.7	175.3	110.5	184.2	285.5	206.6	463.4	538.2	104.6	316.6	391.6	553.2	419	275.4	303.4	366.6	356.4	459.8	366.9	396.7	397	514.1	480.5	325	230.1	452.5	433.1
chrX	7057763	7061638	B0403.5	54.5	14.9	43.6	16.6	5.1	1.6	7.9	4.8	2.4	4.1	13.8	11.6	8.8	7.4	2.7	0	0	14.4	2.2	12.4	2.6	2	1.5	1.3	0	0	2.2	2	9.3	7.4	29.3	14.5	16.5	16.8	8.2	8.8	21.3	23.9	35.1	2.8	13.8	47.2	22.8	29.6	18.7
chrX	7071345	7075293	B0403.6	2.9	1.5	3	2.3	2.1	1.6	2.9	1.8	2.3	1.7	1.8	1.7	1.5	2	1.2	0	0	1	1.5	1.6	1.1	8.8	5.6	4.5	0.1	0.1	0.3	11	1.5	0.2	0.7	0	1.9	2.9	2.2	0.7	1.2	1.6	2	0.2	0.7	1.8	2.4	1.4	1.3
chrX	2894563	2895235	B0410.1	0	0	0	0	0	0	0	0	0	0	0	0	0	0	0	0	0	0	0	0	0	0	0	0	0	0	0	0	0	0	0	0	0	0	0	0	0	0	0	0	0	0	0	0	0
chrX	2885858	2890593	B0410.2	2.2	1.7	3.1	2.8	3.5	6	2.6	5.9	6	7.2	2.6	2.1	2.2	3.2	3.4	84.4	82.1	2.4	4.4	2.8	4.6	0.5	0.6	0.6	86.9	84.5	4.4	0.7	2	78.1	49.4	3.1	2.4	2.8	2.8	52.7	45.7	43	46.8	65.6	58.2	4.1	3.7	47.9	53.5
chrX	2890565	2891483	B0410.3	58.5	36.3	44.3	36.2	31.4	13	23.4	13.9	12.8	13.4	36.2	25.1	27.9	58.4	31.8	2.2	2.4	20.3	28.2	44.1	41.1	26.6	77.4	23	2	2.5	31.9	28.7	42.6	4.4	14.3	26.3	37.2	48.1	43.7	23.2	42.4	46.1	49.2	10.6	7.1	22.8	26.8	15.1	10.5
chrIII	816239	821723	B0412.1	12.2	10.7	15.6	8.7	1.5	1.1	1.3	1.7	1.2	1.3	4.1	6.9	5.7	8.5	11.4	0	0	6.3	0.9	1.7	1.2	3.5	2.1	2	0	0	1.4	3.5	7.6	1.2	2.3	13.5	7.4	5.7	6.4	1.6	2.2	2	2.1	1.5	1.9	10.2	9.5	2.7	2.5
chrIII	811821	813758	B0412.2	28.4	7.7	21.5	50.2	5.9	3.5	6.3	5.8	3.5	5.9	26.9	26.4	28.2	75.8	41	0.1	0	24.2	3.1	6.4	3.5	8.3	17.8	12.2	0.1	0.1	3.8	25.9	68.8	1.4	4.5	61.6	44.6	51.3	65.3	0.8	1.2	0.4	1.6	1.9	1.3	62.2	47	2.8	2.1
chrIII	795130	809434	B0412.3	18.5	15	19.1	15.7	28.6	28.6	27.6	31.7	29.9	33.3	19.2	19.5	16.4	20.2	19.4	45.8	48.3	14.4	24.5	22.7	24.9	25.1	26.8	25.7	45.4	42.4	24.1	33.8	14.1	36.4	24.7	18.7	19.7	21.7	20.1	29.9	22.4	22.9	25.4	33.4	31.4	20.8	19	22.6	23.3
chrIII	794288	795072	B0412.4	3949.3	8751.2	1681.4	12142.6	7542.2	9657.4	8043.9	9783.5	7305.9	11916.2	9528	12770.3	9465.2	4875.6	9311.3	3022.1	3130	10009.6	8013.1	10416.3	10041.1	6151.2	7342.3	7566.5	2904.4	2803.4	9838.3	6024	6354.3	4298.2	6981.1	5213.1	11371.5	17547.6	16022.9	5715	12267.4	3136.8	4836.6	6510.4	3683.8	4864.7	4633.8	6081.2	5843.5
chrI	5801874	5803269	B0414.1	0	0	0	0	0	0	0	0.1	0	0	0.1	0.1	0	0.1	0.1	0.5	0	0.1	0	0.1	0	0	0.2	0.1	0	0.1	0	0.1	0	0.1	0.1	0	0	0	0	0.2	0	0	0	0	0	0	0.2	0	0.2
chrI	5776156	5788612	B0414.2	2.1	2	2.3	2.1	0.5	0.6	0.3	0.5	0.4	0.2	1.5	0.7	0.8	2.3	1.8	1.2	0.4	0.9	0.2	0.5	0.3	1	1.1	1.2	0.5	0.8	0.4	1.5	3.2	2.9	4.3	2.5	2	1.8	2.7	3.9	6.3	4.3	7.4	2.7	5	5.1	3.1	7.2	4.9
chrI	5774587	5775613	B0414.3	82.6	35.6	82.9	89.4	477.1	647.6	507.4	618.5	593.1	608.9	182.3	177.8	164.7	69.1	87.7	1518.8	1195.2	68.1	586.7	508.1	608.4	230	214.6	241.4	1532.3	1306.7	600.7	167.9	105.1	662	412.1	94.6	96.5	119.5	97.5	574.7	281.9	198.7	289	581.8	451.6	49.7	86.8	248.7	443
chrI	5788633	5791755	B0414.5	7.4	2.3	6.5	3	63.2	65	61.2	65.1	65.2	66.1	10.5	10.7	9.5	2.8	2.8	108.1	87	1.6	49.6	44.8	48.5	13.8	13	12.1	101.8	91.3	44.9	17.2	3.4	46.1	26.1	4.6	3.6	6.2	4.1	23.9	12.6	14.2	19	28.3	29.9	0.3	3.4	12.3	21.7
chrI	5792326	5795124	B0414.6	3.4	2.4	2.6	1.8	15.3	16.7	14.2	19	16.9	19.5	4.4	4.9	3.6	1.7	1.4	29.4	25.1	1.3	13.5	10.7	14	7.6	7.6	7.4	27.9	24.7	10.7	10.9	2.5	13.2	11.7	1.9	2.6	2.8	2.4	8.5	4.8	5.2	4.9	7.9	10.9	0.7	1.6	5.1	8.7
chrI	5795406	5801302	B0414.7	12.4	11.2	16.3	10.7	20.2	17.7	15.7	18.7	17.3	20.5	11.8	12.6	10	12.9	11.2	35.7	27.9	7	12.7	10.8	13.5	9	8.8	6.8	32.1	28	12.4	11.6	12.5	33.1	32.5	11.6	10.7	11.7	13.6	22.7	18.6	26.9	26.4	28.4	28.5	13.7	11.4	24.5	26.8
chrI	5803961	5807294	B0414.8	10.6	7.7	14.4	8.6	23	21.2	18	24.2	20	26.4	11.9	12.2	7.6	10	8.7	10.2	10.3	4.4	15.1	10.3	15.1	10.6	8.3	5.4	10.7	10.4	13	11.6	11.3	16.1	20.3	12.4	10.4	12.4	16.5	14.6	13.1	15.7	17.5	23.3	12.5	9.5	7	13.4	13
chrX	9303664	9310424	B0416.1	6.4	2.1	6.8	6	1.5	1.2	1.7	1.2	1.2	1.2	6.9	7.8	5.7	5.4	5.1	0.4	0.2	5.6	1.3	1.4	1.1	1.9	1.6	1.4	0.4	0.3	1.5	3.3	6.1	5.4	7.6	5.2	5.8	6.9	5.6	9.4	8.6	14.4	17.2	9.1	9.3	9	6.5	10.7	9
chrX	9299111	9300072	B0416.2	0	0.1	0	0	0.4	0.2	0.5	0	0.1	0	0	0	0	0	0	0	0	0	0.3	0.2	0.3	1.2	0.8	1	0	0	0	0.5	0	0	0	0.7	0.2	0	0	0	0	0	0	0	0	0	0	0	0
chrX	9291591	9293587	B0416.3	1.7	2.8	1.3	2.6	1.9	1.7	3.1	2.4	2.1	2.1	1.5	0.6	1.7	2.3	1.5	0	0	0.9	1.7	2.5	1.9	0.9	0.7	0.9	0.1	0	2.1	0.9	1.7	0.4	1.8	1.9	1	0.9	1.6	0.6	1	1.2	1.7	0.4	0.9	1.9	1.6	1.2	0.8
chrX	9278902	9279887	B0416.4	0	0	0	0	8.2	8.2	5.9	8	8.7	10.2	0.3	0	0	0.1	0.1	46.9	44.5	0.1	9.6	4.6	10.6	0	0.6	0.4	48.5	48.1	9.2	0.2	0	26.8	24.6	2.1	0.2	0.1	0.1	15	13.5	13.3	8.8	15.9	24.1	0.2	0	8.1	18
chrX	9268572	9270794	B0416.5	39.7	36.2	52.4	40	45.3	45	40.8	50	45.2	51.5	60.1	60.2	56.2	52.2	52.9	250.7	252	32.3	34.4	34.2	38.6	26.3	26.8	24.7	242.1	253.5	36.1	45.7	48.6	270.9	188.9	52.1	52.2	45.6	52.2	186	135.2	180.8	169	238.6	217.8	54.3	50.6	189.1	200.1
chrX	9293606	9296563	B0416.6	14.5	9.1	18.1	5.7	15.3	13.2	12.8	12.1	11.2	12.8	10.8	9.9	11.6	9.9	9.6	5.1	6.7	6.8	10.3	11.3	12.6	6.5	7	7.2	4.9	5.3	11.5	8.8	7.8	9.9	11.4	6.8	12.6	11.2	13.1	10.4	11.7	18	15	12.1	14.1	9	11.3	14.1	7.9
chrX	9296885	9297891	B0416.7	7.9	29.4	16	2.5	8.9	6.1	10.3	6.4	7.8	6.7	5.2	7.3	11.6	15.4	7.5	0	0	2.1	4.9	9.7	4.7	4.8	3.7	2.5	0	0	2.2	3.5	3	1.1	10.4	11.7	2.2	8.1	11.4	0.8	1.8	1.3	0.9	0	0.6	7.9	14.9	8.1	4.1
chrII	297398	299527	B0432.1	0	0.1	0	0.1	0.3	0.3	0.2	0.6	0.3	0.4	0	0.1	0.1	0.8	0.4	0.3	1.3	0	0.5	0.4	0.6	0	0.6	0.1	1.5	1.1	0.3	0.2	0	0.7	1.9	0	0	0.1	0.2	0.3	0.2	0.3	0.2	0.7	0.6	0	0.2	0.4	0.7
chrII	283886	286275	B0432.10	5.2	5.4	7.7	4.2	13	13	11.3	16.2	14.2	16.3	7	6.8	5.7	5.3	3.8	21.6	27.9	3.4	8.5	6.8	8.8	5	6.6	4.2	20	23.4	5.9	7.1	4.3	23.5	18.3	4.1	4.1	4.8	5.5	21.8	18	14.7	11.9	25	17.5	3.8	2.8	14.3	14.6
chrII	293863	294642	B0432.11	0.3	0	0	0	1.6	0.5	1.9	0.9	0.6	0.7	0	0	0	0	0	0	0	0	0.3	1.1	0.8	25.4	23.3	19.5	0	0	0.7	22.6	0	0	0.4	0	0.2	0	0	0	0	0	0	0	0	0	0	0	0
chrII	296274	297017	B0432.12	0	0	0	0	5.1	0.9	4.7	3	1.8	1.7	0.2	0	0	0	0	0	0	0	1.9	4.7	3.4	75.6	68.3	96.2	0	0.1	1.8	64.5	0	0	0.5	0	0	0	0	0.2	0	0	0	0	0	0	0	0.2	0
chrII	276211	282576	B0432.13	6.7	4.3	7.4	5.8	23.6	22	19.3	24.6	22.7	22.5	7.9	6.9	6	5.5	5.6	47.2	44.8	4	20.7	18	21.6	14.1	11.1	9.8	43.4	41.9	20	13.8	7.5	31.6	18.8	4.4	3.7	4.4	3.6	18.6	15	18.5	17.4	36.4	25.6	6.4	4.3	10.8	17.9
chrII	264352	265841	B0432.14	3.4	31.6	3.1	14.9	2	1	1.3	1.9	0.6	2.8	9.9	4.9	12.2	22	12	0	1.5	7.8	2.1	2.3	1.3	14.2	13.5	12	1.7	0.6	3.4	13	13.4	2.2	3.3	5	10.1	11.1	16.8	1.5	3.4	0.7	2.1	0.7	1.5	19.8	7.4	3.5	2.2
chrII	290580	291861	B0432.2	35.5	35.2	34.6	46.7	66.2	69.5	74.5	75.3	69.5	73.8	51.1	56.5	39.5	35.3	37.5	179.9	144.4	37	59.4	52.3	74.5	84	84.9	85	172.3	160.6	64.7	92.3	55.2	105.6	63.9	27.6	54.5	51.6	49.3	95.4	79	62.5	58.5	108.2	77.1	28.5	33	52.4	73.8
chrII	288936	290399	B0432.3	45	79.6	49.6	56.8	42.3	32.6	42.2	42.5	39.4	53.9	58.8	63.8	49.2	58.4	59.3	26.2	27.5	48.4	37.2	38.4	38.2	38.8	36.5	29.6	21.2	23.9	34.8	36.3	57.6	36.9	37.6	51.8	49.5	55.1	68.3	41.6	53.5	35.9	28.6	34	41.6	24.1	36.6	39.5	40.9
chrII	286624	288850	B0432.4	79.2	69	92.3	81.6	77	60.2	66.8	69.5	64.8	72.7	83.7	84.4	81.8	106.8	78.6	111.7	115.3	60.6	51	53.5	58.4	63.6	79.6	52.6	118.4	111.5	50.9	92.8	104	94.7	73.8	96.4	88.9	79.9	96	68.4	63.3	84.4	68.3	69.7	86.3	49.2	63.9	70.2	78.4
chrII	257818	261063	B0432.5	2.7	2.4	3	3.7	0.6	0.3	0.8	0.5	0.6	0.5	4	3	4.1	3.1	1.8	1.4	0.8	2.4	0.2	0.6	0.7	1.4	2.5	1.6	1.3	0.9	0.4	2	3.2	0.8	1.3	3.6	3.7	4.3	3.2	1.1	1.8	2	2.5	0.6	1.1	1	1.9	3	1.3
chrII	266446	269280	B0432.6	4.7	3.6	9.1	3.8	11	12.9	9.6	9.6	11.3	9.5	4.7	4	3.4	4.3	4.3	16.3	14.6	3.6	8.5	5.9	8.5	3.6	3.9	2.4	18.3	14.9	7.9	4.5	4.8	17.4	16.8	5.6	4.8	4.4	4.6	23.6	22.1	23.8	26.9	19.9	21.3	5.6	4.6	22	16.4
chrII	269389	273966	B0432.7	3	2.9	4.7	3.3	9.1	8.5	7.2	8.1	8.2	9	4.1	4.6	3.7	2.7	3.4	15.3	11.4	2.6	6.1	4.2	5.1	2.3	2.5	2.4	14.7	13.3	5.6	3.7	2.7	14.4	13.4	3.2	3.6	3.3	2.9	18.7	16.6	17.9	19.4	17.4	17.2	4.3	3.4	18.4	14.5
chrII	276425	278738	B0432.8	2.9	0	4.1	2.3	12.7	13.2	10.2	13.5	13.9	17.1	3.8	3	2.7	1.9	2.2	10.7	9.4	1.8	6.7	6.2	7	6	3.1	4.7	11.6	10.8	10.3	7.4	2	10	6.8	4.6	3.5	1.9	2.7	6.6	4.4	3.9	3.7	3.3	6.3	2.7	0	3.5	3.5
chrII	280555	283697	B0432.9	0.9	2.3	0.7	2.3	1.9	2.2	2.6	1.6	1.4	3.1	2.8	3.8	1.8	1.8	1.6	3.6	2.9	2	1.7	0.6	0.7	1.7	1.3	1.5	4	4.1	0.8	2	0.6	4.5	3	2.2	1	1.8	2.5	2.9	3.2	2.1	2	2.3	2.9	2.5	2.1	2.8	2.3
chrII	3056643	3060251	B0454.1	8.2	8.3	8.9	8.9	11.6	14.2	12.4	13.9	10.9	13	9.4	8.8	9.6	8	7.7	63	61	6.4	10.5	8.6	11	7.7	5.6	4.5	60	60.9	9.3	6.6	11.7	48.7	41	9.4	7.6	7.4	10.3	28.8	22.1	20	22.3	25.8	29.9	7.5	7.1	33.9	38.1
chrII	3046221	3048157	B0454.10	1.2	3	1.8	0.6	0.1	0.1	0.2	0.2	0.2	0.2	0.5	0.2	0.7	1.6	1.1	0	0	0.7	0.1	0.3	0.1	0	0.1	0	0	0	0.1	0.4	0.4	0	0.5	0.7	0.8	0.6	0.9	0.3	0.5	0.3	0.7	0.1	0.1	1.2	0.8	0.6	0.7
chrII	3051005	3052325	B0454.2	0	0.2	0.1	0.1	0.2	0.1	0	0.1	0.1	0.1	0.2	0	0	0.2	0	0.3	0.3	0	0.1	0.1	0	0	0	0.1	0.2	0.5	0	0	0.2	0.3	0.5	0	0.3	0.1	0.1	0.4	0.3	0.2	0.2	0.2	0.2	0	0	0.3	0
chrII	3048680	3050438	B0454.3	0	0.1	0	0.1	0	0	0	0.1	0	0	0	0	0.1	0.2	0.2	0	0	0	0	0.1	0	0.1	0.1	0	0	0	0	0	0	0.1	0.2	0	0.1	0	0.4	0	0.1	0	0.1	0	0	0	0	0.2	0
chrII	3044325	3046118	B0454.4	0.4	1.6	1	0.5	0.1	0.1	0.1	0	0.1	0.1	0.4	0.5	0.1	1.3	0.9	0	0	0.3	0.1	0.1	0	0.1	0	0	0.1	0	0	0	0.4	0.1	0.2	0	0.2	0.7	1.2	0	0.2	0.1	0	0	0	1.3	0.6	0.2	0.1
chrII	3038861	3040825	B0454.5	8.1	25.4	22.8	9.2	20.2	15.7	15.9	13.6	18.7	15.5	14.1	11.9	33.5	29.1	50.6	0	0	12.7	16.3	18.6	23.7	11.4	22	16.5	0.1	0.2	19.8	13.8	19.2	0.9	1.1	19.8	32.1	35.8	47.5	2.1	4.6	1.2	1.5	2.4	1.7	19.8	41.4	2.9	1.6
chrII	3032782	3036125	B0454.6	20.4	18.7	16.8	10.6	9.6	4.7	11.8	7.8	6.2	7.1	12.7	13.4	12.4	13	8.7	0.7	1	5.6	5.2	7.8	6.8	18.3	18.1	15.6	0.7	0.9	7	25.4	10	3	5.2	8.6	7.8	9.1	9.9	7.6	6.5	6.7	7	2.8	4.4	8.3	7.1	5.9	4.8
chrII	3020563	3023434	B0454.7	0.1	0.1	0.1	0.1	0	0.1	0	0.1	0	0	0.1	0.2	0	0.2	0.1	0	0	0	0	0	0.1	0.1	0.1	0.1	0	0	0	0.3	0	0	0.6	0.1	0	0	0.1	0	0	0	0.1	0	0	0.1	0	0.2	0.2
chrII	3040942	3043409	B0454.8	0.3	0.3	0.1	1.2	0.3	0	0.3	0.1	0	0	0.4	0.9	0.1	0.2	0.3	0	0.1	0.4	0.1	0.1	0	0	0	0	0	0	0.1	0	0.3	1.8	2.2	1.4	1	1.1	1.1	0.5	1	1.2	2.6	0	4.9	8.6	2.4	0.9	2.4
chrII	3052377	3054351	B0454.9	3.2	7.4	3.6	4.3	5.7	6.6	5.7	6.4	5.9	7.3	5.4	4.7	5.6	4.7	4.3	29.7	29.8	4	5	5.4	5.2	7.8	3.6	3.7	28.4	29.9	6.1	4.9	4.2	24.2	25.3	6.3	4	4.2	5.2	19.8	15.2	10.2	13.5	17.2	17.8	6.8	4.4	25.8	22.6
chrII	8896779	8908592	B0457.1	19.4	13.8	17	15	53.2	56.3	53.1	64	60.5	64.4	13.3	13.2	13.7	16.5	13.8	116.2	92	9.3	50.6	36	51.3	27.9	30.6	32.1	117.6	106.1	47.7	33	13.9	109.7	81.8	17.2	16.2	16.9	17.4	98.9	69.3	73	85.8	64.4	111	17	20.8	96.1	85.8
chrII	8924509	8926517	B0457.2	12.6	35.6	24.7	7	10.1	5.6	6.8	5.6	6.8	5.9	8.8	7.2	17.2	20	12.1	0.2	0	4.8	5.2	6.6	5.8	9.2	10.6	11.2	0.2	0.2	5.9	14.6	7.7	2	8.7	10.5	10.2	10.1	15.2	1.6	6.5	5.4	12.1	0.5	3.3	15.1	24	8.4	5.2
chrII	8910851	8911968	B0457.4	0	0	0.2	0.4	0.2	0.1	0.3	0.1	0.5	0.3	0	0	0	0	0	0	0.4	0	0.1	0.9	0	3.6	2.3	3.4	0	0	0	3.3	0	0	0.1	0.4	0	0	0	0	0	0	0	0	0	0	0.2	0	0
chrII	8922389	8924311	B0457.6	42	22.5	34.6	49.6	37.7	40.5	32.3	26	37.1	24.1	37.4	27.5	33.4	35.1	31.6	4.3	5.4	27	31.8	35.9	32.3	35.3	34.7	33.7	2.9	2.5	24.5	49.7	56.6	10.5	50.1	27.6	35.7	53.3	44	28.5	57.7	57	40.9	16.3	24.7	43.3	45.1	55.1	44.5
chrV	18324993	18328763	B0462.1	0	0.1	0.1	0.3	0.2	0.1	0.1	0	0	0.1	0	0.1	0	0.2	0.2	1.2	0.2	0	0	0	0	0.5	0.4	0.4	0.4	0.3	0	0.7	0.5	0.6	0.7	0	0.5	0	0.1	0.8	0.2	1	0.6	0.4	1.1	0.1	0.2	1.2	1.4
chrV	18318566	18319748	B0462.3	0	0	0	0	0.2	0.4	0.1	0.5	0.4	0.7	0	0	0	0.1	0	29.1	38.1	0	0.2	0	0.2	0	0.1	0	25.9	35.4	0.1	0	0	22.3	13.6	0.4	0.1	0	0	11.6	5.1	8.8	11.6	13	16	0	0	7.1	11.4
chrV	18329083	18331151	B0462.4	5	0.3	1.9	5.2	2.1	0.7	1.2	0.7	0.5	0.3	1.7	3.6	1.6	3.4	2.8	4.2	1.3	1.7	0.9	1.2	0.5	9.4	1.2	0.2	6.8	5.2	0.8	0.7	2.4	4.2	3.9	0	5.1	3.6	3	8.8	34.1	38.2	8.8	125.1	2.1	2.5	7.6	3.2	3.7
chrV	18322186	18323299	B0462.5	0.2	2.4	1.8	1.5	3.4	2.8	2.4	2	0.9	2.1	1.6	0.7	1.3	3.1	1.7	0.4	0	1.3	2.5	5.1	0.8	12	16	19.6	0.1	0.1	0.4	17.8	4.5	0.3	3.1	6.6	4.8	2.8	7.4	0.1	0.3	0.3	0.4	0.9	0	3.8	4.4	2.8	2.9
chrIII	9489077	9491152	B0464.1	144.2	70.7	191.7	117.5	138.6	131.4	133.9	129.6	126.5	137.3	168.7	176.9	163.6	119.1	129.2	135.3	116.3	109.4	104.5	107.8	106.8	98.4	77.2	79.4	135.8	126.7	99.2	114.4	129.4	108.2	118.5	130.9	134.9	142.5	139.6	93.7	64.6	89.6	81.9	107.1	99.5	119.1	151.4	109.3	100.7
chrIII	9491219	9497236	B0464.2	43.6	18.3	48.5	25.5	47.3	42.7	45.2	48.2	42.7	47.1	34.8	32.1	26	25.3	27	133.5	119.7	21.3	34.5	31.5	35.2	27.6	26.8	23.1	127.8	122.7	32.7	34.8	20.6	105.6	98.5	22.8	25.9	27	26.7	66.9	54.1	68.3	59.5	95.3	88.5	26.3	28.8	68.6	74
chrIII	9488533	9489102	B0464.3	477.5	774.5	312.7	1025	1148.2	898.4	1013.8	682.8	739.8	729.8	1029.8	911.8	1412.6	787.9	1388.1	470.7	520	1227.4	977.2	1549.9	917.6	599.5	522.8	606.8	514	507.8	864.4	586.3	1697.6	472.3	486	936.3	1204.8	1792.2	1716.8	968.9	1768.6	772	781.8	571.3	529.2	1365.3	1393.1	676.5	580.4
chrIII	9469841	9485367	B0464.4	33.8	25.2	44.8	18.5	37.8	29.6	37.7	33.8	33.1	39.7	22.3	21.7	21.5	21.2	15.8	16.3	11.5	13	26.1	26.2	25.6	49.7	47.5	54	15.6	13.5	21.7	68	21.3	16.9	25	23.3	19.8	20.3	19.3	14.1	12.4	17	27	5.7	15.7	24.7	24.3	19.4	15.2
chrIII	9456478	9462921	B0464.5	105.7	82.5	142.1	91.7	119.6	114.4	117.6	118.3	114.4	114.3	99.2	95.4	103.4	104.9	97.7	127.9	131.4	69.4	99.8	107.4	97.3	115.9	128	117.2	131.6	130.5	96.3	163.8	104.9	165.2	164.3	94.9	88.9	88.9	98	142.8	134.7	159	158	174.8	150.9	97.7	98.2	154.1	145.3
chrIII	9462899	9465881	B0464.6	19.3	12	19.1	16.5	70.9	66	60.3	64.5	61.9	68	24.8	24.9	22.4	17.1	16.4	158.1	152	11.2	57.3	51.9	62.9	28.3	27	25.8	159.1	151.3	55.1	34.1	16.7	108.7	72.5	18.7	17.2	17.7	19.3	60.2	36.7	46.3	49.6	93.7	78.5	17.8	22.5	51.6	60.6
chrIII	9467372	9467982	B0464.7	106	85.7	109.2	137.8	218.8	264.8	190.4	201.6	205.9	218.9	167.7	162.9	167.2	91.2	118.1	798.4	850	131.8	238.9	240.8	192.5	153.2	131	155.7	836.4	844.5	174.4	132.4	136.7	611.8	466.2	147.9	145.6	172.7	151.3	509.7	540.5	339.4	304.4	490.8	471.9	162.8	159.7	415.1	531.9
chrIII	9468071	9470450	B0464.8	7.7	4.6	10	5.2	27.5	24.1	25	25.7	26.7	29.1	7.3	7.9	6.1	4	4.1	69.5	55	2.8	25	21.4	24.4	9.1	10.8	9.6	72.7	62.7	22.5	9.6	5.5	45.3	37	4.8	5	6.9	5	34.6	19.8	23.6	23.9	44.3	35.9	4.7	5.9	22.1	28.7
chrIII	9465688	9467064	B0464.9	9.3	6.1	11	8.5	24.6	30.4	23.1	32	29.8	34.9	9.9	8.4	8.7	7.1	8.3	67.7	56.5	6.8	22.8	20.1	24.4	11.8	10.8	10.6	60.1	57.7	21.1	11.8	8.5	43.1	28	5.7	7.8	8.3	9	33.5	22.4	21.2	19.8	35.1	26.9	7.3	7.4	25.4	24.1
chrIV	6957629	6963705	B0478.1	5.3	7.8	8.1	7.2	1.6	0.7	0.9	0.6	0.5	1.2	4.8	6.6	5.1	9.4	7	0.7	1	6.3	0.8	0.8	0.7	1.9	2.1	1.7	0.6	0.6	0.8	3.4	5.5	5.5	10.9	5.6	6.2	6.8	8	14.4	16.9	23.7	24.3	6.1	12.4	9.1	7.6	18.8	11
chrIV	6963863	6964551	B0478.3	7.1	4.3	2.6	8.8	2.5	1.2	2.5	2.1	0.6	1.6	5.6	7.2	5.8	10.6	8.2	0	0	2.6	0.4	1.1	0.9	3.3	2.2	2.8	0	0	0.9	7.1	12.7	0.6	2.3	4.6	10.6	6.6	10.3	2.4	2	3.1	3.9	0.5	1.7	5.2	6.7	2.5	2.1
chrII	11348365	11350312	B0491.1	8	11.5	12.1	6.6	24.2	25.3	20.8	23.6	26.6	26.2	11.3	9.2	8.4	8.7	7.4	12.4	18.5	4	19.1	17.7	18.7	21.7	19.7	19.8	13.5	17.9	17.1	30.2	10.8	28.8	23.1	11.6	9.7	9.2	10.3	16.8	19.6	20.8	16.7	40.5	24.6	8.6	8.5	24.7	23.8
chrII	11336626	11337771	B0491.2	836.1	307.3	402.9	2117.7	38.8	7.1	43.8	49.1	13.9	39.1	1265.3	1202.1	247	396.3	349.8	3.4	3.8	1315	18	113.6	11.8	1.3	4.3	5.1	1.8	1.6	9.7	0.6	1044.9	0.2	0.5	1202	979.1	957.9	453.9	0.7	0	1.2	6.5	2.9	1.2	2182.9	743.8	0.8	2.3
chrII	11338385	11339535	B0491.3	0	0.1	0.3	0	30.9	11.6	38.7	18.3	13	17.3	0.6	0.6	0.1	0.2	0.2	0	0.4	0.3	16.7	34.9	20.4	369.5	382.6	424.7	0.3	0	19	351.4	0.8	0	0	0	0.3	0.6	0.1	0	0	0.1	0.4	0	0	0.2	0	0.2	0
chrII	11340069	11343466	B0491.4	2.2	3.2	2.2	1.7	0.6	0.2	0.6	0.4	0.3	0.3	1.3	1.8	1.2	2.7	1.9	0.5	0.2	1	0.2	0.3	0.1	1	1.5	1	0.2	0.3	0.1	2.1	3.4	3.1	6.2	2	1.7	1.9	1.7	6.9	8.5	10.4	11.3	4.7	5.4	2.2	1.3	7.6	7.1
chrII	11343651	11345679	B0491.5	163.8	153	179.1	221.4	201.6	205.3	214	186.8	184.6	181	252.6	258.9	291.1	244.5	251.8	320.8	298.1	244	189	211.7	163.4	246.1	220.6	218.1	321.6	300.5	155.3	280.4	274.2	260.9	165.5	252.4	266.3	232.3	254.5	222.5	177.7	183.2	177.5	284.3	184.7	177.4	209.3	177.9	180.4
chrII	11345880	11347893	B0491.6	13.2	18.5	16.9	11.2	19.6	18.6	17	19.4	18.2	20.2	13.9	15.7	10.2	17.5	11.3	20.9	23.7	7.6	13.4	12.6	14.4	8.7	12.9	9.1	23.9	22.8	13.2	12.5	13.2	21.2	29.1	10	11.7	12.7	13.8	20.4	24	29.8	26	30.6	22	9.9	7.2	21.8	21.9
chrII	11350125	11351311	B0491.7	19.8	18.3	26	15.2	17.5	20.2	18	21.2	19.3	20.7	21.6	22.6	18.9	22.4	17.3	12	17	18.2	16.6	14.4	15	7.2	8.3	8.6	12.8	14.2	14.6	8.8	13.3	15	13.7	15.1	15.5	16	13.9	14.3	14.6	15.7	14.7	12.3	14.6	15.8	18.3	10.6	11.9
chrII	11358382	11370248	B0491.8	6.5	5.9	7.1	5.6	1	0.5	1	0.9	0.7	0.8	4.4	5.7	4.1	7.3	5.2	0	0.2	3.8	0.8	1	0.6	3.8	3.1	2	0.1	0.1	0.8	5.3	6.8	0.3	1.6	5	3.6	4.8	5	1.3	1.7	2.3	3.4	0.6	1	7.1	6.2	2.2	1.5
chrII	7709735	7711391	B0495.1	0	0.1	0.3	0.2	0	0.1	0.1	0	0.1	0	0.3	0	0.3	0.1	0.2	0	0.3	0.1	0	0	0	0.2	0.1	0.1	0	0	0	0.2	0.1	0.1	0.2	0.7	0.5	0.7	0.3	0	0.3	0.1	0	0	0.2	0.7	0.7	0.2	0.3
chrII	7711817	7718538	B0495.10	11.5	11.2	14.6	17.1	2.6	1.6	2.4	1.8	1.5	2.6	13.9	14.3	10.8	16.5	12.4	0.4	0	10.6	1.4	3	1.9	4.2	4.3	3.4	0.3	0.2	1.8	6.4	11.1	9.8	23.1	11.8	9.9	10.6	10.8	20.8	26.4	35.3	30.9	14.5	20.1	13.7	9.9	29	19.7
chrII	7699200	7702251	B0495.2	17.5	8.2	23.1	13.3	33	26.6	29.2	31.8	32	31.5	17.9	15.7	13.9	13.2	14.7	55	52.6	9.5	22.4	21.4	23.9	19.5	20.2	17.5	56.7	50.7	20.1	24.8	13	32.3	37.9	14.7	12.3	15.4	15	22.5	14.7	20.6	21.5	31.6	28	12.5	15.9	25.2	28.8
chrII	7690655	7693906	B0495.4	40.2	28.1	45.9	25	19.2	11.7	15.9	13.6	18.6	16.5	52	43.1	33.5	24.3	28.9	0.1	0.8	15.4	9.3	14.5	12.6	7.1	5.8	5.4	0.4	0.3	10.2	8.4	32.5	7.3	11	28.2	30.2	30.7	32.8	12.2	13.5	19.9	22.4	5.8	11.8	24.3	29.7	17	10.8
chrII	7695882	7698454	B0495.5	7.6	7.8	10	6.8	8	8.4	7.4	9.7	7.5	9.1	8.8	7	6	8.3	6.5	10.5	9.8	5.2	6.4	5.7	6.1	6.9	6.7	6.3	9.1	9.5	6.5	9.2	7.9	10.7	9.9	8.3	7.5	7.2	7	10.6	8.1	10.6	11.7	11.7	10.5	6.6	6.1	9.8	8.1
chrII	7698558	7699125	B0495.6	13.3	27.2	15.3	58.7	104.2	107	93.5	116.1	102.3	121.3	55	41.1	45.2	43.6	55.2	209	194.7	60.2	60.8	59.5	67.9	56.3	50.1	53.3	203.3	193.2	51	47.5	57.1	227.4	167.1	54.3	82.5	93.9	90.7	159.6	259.4	199.3	136	188	195.9	48.7	64	166	171.4
chrII	7701894	7705182	B0495.7	94.7	40.6	96.6	59.3	42.2	37.3	38.9	45.1	38.3	43.5	81.4	82	76.5	51.1	53.9	119.8	115.5	45.3	30	33.7	30.7	33.1	33.6	32.2	117.7	117.3	29.7	46.1	68.2	88.4	65.5	62.7	66.7	70.7	67.1	73.5	49.7	68.3	65.1	76.8	74.9	63.3	63.9	54.3	67.1
chrII	7705481	7707430	B0495.8	34	16.8	41.3	23.7	36.4	40	36.9	43.3	37.8	42.5	24.6	25.3	22.4	24.7	28	123.3	109.2	22.8	46.7	40.9	46.8	36.5	38.1	40.3	121.6	120.6	41.4	39.4	20.5	107.1	78.4	28	23.7	28.3	22.8	80.5	67.7	76.7	73.1	85.6	97.5	24	26.1	71.3	81.2
chrII	7707528	7708663	B0495.9	24.9	15.6	32.1	19.9	32.7	26.9	30.3	30.5	28.8	31.5	26.2	23.2	22.5	18	19.2	36.9	32.5	13.3	21.4	21.2	24.5	26.2	26.2	25.6	34.2	32.3	21.5	32.4	22.7	28.1	26.1	19.4	19.9	20	23.9	28	25.9	33	26.2	27.2	24.7	19.6	18.1	24.2	24.7
chrIV	7446378	7447452	B0496.1	0	0.1	0.1	0	0.6	0.4	0.6	0.3	0.1	0.7	0	0.2	0	0.1	0	0	0	0	0.4	0.4	0.5	12.8	8.5	10	0.1	0.1	0.3	12.3	0	0	0.5	0	0.1	0	0.1	0	0	0	0	0.1	0	0	0	0	0.1
chrIV	7433536	7433947	B0496.11	3	6.7	9.2	6.2	1.9	0.3	0.4	2.9	0.9	0	5.1	3.7	2.8	13	6.4	0	0	2.9	0	1.7	0.6	1.9	2.1	1.5	0	0	0	2.8	6.5	0.6	1.8	8.9	5.5	6.4	9.8	0.5	0	0.4	0.7	0	0	1.5	4.5	0	0
chrIV	7447844	7449363	B0496.2	0.1	0	0	0	0.2	0	0.2	0.2	0.1	0.1	0	0	0	0	0	0	0	0	0	0.2	0	1.8	1.5	1.4	0	0	0.1	1.8	0	0	0	0	0	0	0	0.1	0	0	0	0	0	0	0	0	0
chrIV	7424484	7444651	B0496.3	33.6	13.3	32.5	20.3	9.1	5.7	7.8	5.4	5.8	6.2	22.8	22	16.4	25.1	20.9	1.5	0.9	22.9	6	10	5.5	10.8	11.5	9.1	1.3	1	5.4	17.7	18.6	14.1	29.5	18.6	22.5	22.6	23.1	31	35.9	49.4	53.5	23.2	30.9	34	24.4	38.4	25.2
chrIV	7420946	7422660	B0496.5	0.1	0	0.4	0.2	0.1	0	0	0.1	0	0.1	0.6	0.5	0.2	0.4	0.6	0	0	0.1	0.1	0.2	0	0.1	0.1	0	0	0	0	0.4	0.2	0.2	0.2	0.5	0.1	0.1	0.1	0.1	0.2	0.6	0.8	0.1	0.2	0.2	0.1	0.3	0.2
chrIV	7419140	7419960	B0496.6	0	0	0	0	1.2	0.5	1.6	1.2	0.6	0.8	0	0.3	0.1	0.3	0.1	0.4	0	0	0.6	0.5	0.6	14	9.9	12.4	0.1	0.3	0.1	14.9	0	0.1	0	0.6	0.2	0.1	0.1	0.3	0.2	0.1	0.5	0.2	0.1	0.2	0.2	0.2	0.5
chrIV	7444622	7445354	B0496.7	3	22	13.9	18.3	16.7	10.8	20.7	13.8	10.8	12.5	17.5	16	12.7	16.1	13.6	0	0	7.6	9.3	17	6.8	30.1	34.6	35.4	0.4	0	4.4	65	18.9	19	36.8	22.2	18	23	29.9	63.4	95.1	77.1	71.8	22.3	46.6	27.9	12.4	59.4	46.1
chrIV	7449072	7451434	B0496.8	14.6	9.9	12.8	10.8	4.9	3.9	4.9	3.7	3.9	5	7.8	9.6	5.5	6.4	6	4.7	4.6	6.7	2.7	3.8	4.2	7.3	7.6	9.1	4.9	4.2	3.9	9.5	8	11.5	19.5	8.2	8.8	6.4	7.6	19.8	19.1	28.9	25.6	11.8	17	10.5	7.1	19.2	13.3
chrV	8776633	8779271	B0507.1	19.1	2.3	10.2	20.1	1.8	0.9	1.6	1.3	1	1.4	16	13.4	3.1	6.2	4	0.9	1.2	14.7	0.8	1.3	1	0.9	1	1.1	1.2	1.2	0.8	2.2	14.4	10.6	23	17	13.7	11.2	7.8	29.6	27.5	34.4	30.1	17.9	21	28.2	13.2	37.4	27.7
chrV	8758797	8760494	B0507.10	6.5	1.3	3.1	1.5	2.1	0.8	2	0.3	0.9	0.4	1.4	1.1	0.8	5.2	2.4	0	0	0.5	1	2	0.7	2.5	1.6	1.2	0.1	0	0.6	0.9	3.5	0	14.1	1.7	3.1	8.3	5.6	1.1	1.3	2	1.5	0.9	1.1	3.4	2.8	12.3	16.6
chrV	8771876	8773759	B0507.11	0	0	0.1	0	0	0.1	0	0.1	0.1	0.2	0.1	0	0	0.2	0.1	0	0	0.1	0	0.1	0	0	0	0	0.1	0	0	0.1	0.3	0	0.2	0	0	0.5	0	0	0.1	0.2	0	0	0.1	0.3	0.1	0.1	0
chrV	8774309	8776494	B0507.2	21.6	20.6	27.7	17.6	9	5.9	10.1	9.6	7.7	8.1	18	16.4	14.6	22.4	15.9	11.6	11.6	13	6.4	7.5	8.2	17.4	14.6	12.7	10.4	10.8	6.5	16.9	22.2	17.9	39.5	20.2	22.2	18	20.7	27.4	24.3	37.8	30.6	36.4	24	27.3	20.4	51.3	36.2
chrV	8768886	8770854	B0507.3	3.7	11.4	7.9	4.7	3.9	3.3	2.8	3.1	3.7	2.6	4.4	4.5	4.9	7.4	5.9	8.6	6.5	5.3	1.8	5.1	2.1	6.9	5	3.3	7.8	7.3	2.6	5	4	19.8	16.2	5.3	5.3	5.2	5.3	17.1	15.9	18.9	20.5	22.2	24.4	13.5	13	23.7	24.6
chrV	8754947	8755737	B0507.4	0	0	0	0	0	0	0.1	0	0	0	0	0	0	0	0	0	0	0	0	0	0	0	0	0.2	0	0	0	0.3	0	0	0	0	0	0	0	0	0	0	0	0	0	0	0	0	0
chrV	8753672	8754851	B0507.5	0	0	0	0	0	0	0	0	0	0	0	0	0	0	0	0	0	0	0	0	0.1	0	0	0.1	0	0	0	0.1	0	0	0.1	0	0	0	0	0	0	0	0	0	0	0	0	0	0.1
chrV	8746135	8753044	B0507.6	0.4	1	0.7	0.3	0.4	0.3	0.5	0.1	0.2	0.1	0.1	0.1	0.1	0.4	0.1	0	0	0	0.2	0.6	0.2	0.7	1.1	1.2	0	0	0.2	1.5	1.2	0	2.1	0.2	0.4	0.5	0.7	0	0.1	0.2	0.1	0.1	0.2	0.2	0.5	1.8	2.2
chrV	8756467	8758698	B0507.7	0.1	0.1	0.1	0.1	0.3	0.2	0.1	0.1	0	0.2	0.4	0	0	0.1	0.1	0.2	0	0.1	0	0	0	0	0	0	0	0	0.1	0.1	0.3	0	0.1	0	0.2	0.2	0.3	0.3	0.1	0.1	0	0	0.1	0.1	0.2	0	0.1
chrV	8760664	8763172	B0507.8	2.5	0.9	1.2	0.9	0.9	0.1	0.8	0.1	0	0	0.9	0.3	0.6	2.2	1.1	0	0	0.3	0.2	0.5	0	0.4	0.5	0.8	0	0	0.1	0.6	1.9	0.1	12.4	1.6	2.1	7.6	3.4	0.2	0.8	0.7	0.9	0.4	0.8	1.8	1.1	8.9	11.2
chrV	8764865	8766016	B0507.9	0.4	0	0.8	0.4	0.1	0.1	0.5	0.2	0.1	0.2	0.1	0.5	0.1	0.1	0	0	0	0.4	0.1	0.2	0	0.8	1.2	0.8	0	0	0	1.2	0.2	0	0.2	0	0.2	0.2	0.3	0.1	0.3	0	0.4	0.1	0.2	0	0.1	0.5	0.5
chrI	10667943	10671005	B0511.1	5.9	6.5	8	7.7	0.6	0.7	0.6	0.8	0.8	1.6	8.4	5.6	6.5	6.3	9.9	12.8	16.1	3.1	0.3	1.2	0.6	1.1	1.1	1.1	13.2	13.8	0.3	1.4	12.8	47.4	63.8	3.3	8.5	6.3	8.3	69.4	71.1	101.8	66.5	63.4	73.9	7.9	5.1	71.4	56.9
chrI	10640381	10642272	B0511.10	76.3	51.7	87.5	90.6	76.3	80.7	73.9	77.8	69.4	83.4	109	117.4	98.5	86	90.4	175.6	152.5	93.5	51.2	53.6	58.3	69.5	58.9	56.6	168.1	157.7	52.4	78.9	84.1	104.3	93.7	104.3	103	111.2	107.3	72.5	57.2	71.6	71.5	90.6	82	67.7	87.7	78.3	73.4
chrI	10648589	10654168	B0511.11	1	0.4	2	1.1	6.7	2.6	6.8	4.8	3.9	5.4	1.4	1.8	1.9	0.8	1.3	1.5	0.7	0.7	4.9	8.7	8.6	61.2	76.7	78.9	1.3	0.9	5.6	72.6	1.2	1	2	0.4	0.5	1.1	0.8	1.6	1.1	1.6	2	1.2	0.9	1.3	0.7	1.5	1.6
chrI	10654286	10661591	B0511.12	14.3	9.6	15.8	11.5	32	33	31.3	34.9	32.6	34.6	14.3	15.3	13.6	12.4	11.4	38.7	39	8.4	24.2	22.7	26.7	16.1	14.8	13.6	39.7	38.7	23.9	23.1	11	47.7	41.6	11.6	12.2	12.5	11.7	35	30.2	41	39.4	49.5	45	18.1	15.4	36.3	38.5
chrI	10633178	10636006	B0511.13	4.5	2.3	5.6	3.9	16.9	18.3	17	17.8	17.7	18.4	5.1	4.2	3.6	2.6	3.3	27.9	26	2.8	13.1	11.7	14.9	5.3	5	5.4	27.4	25.1	13.9	9.2	3.2	19.2	15.7	2.8	3.6	3.8	2.5	13.5	10.9	9.4	8.4	12.9	17.3	2.1	3.4	8.4	12.9
chrI	10662515	10666866	B0511.14	8.5	6.8	10.2	8.7	25.3	24.1	22	25.4	23.2	26.3	9.3	8.6	9	8.3	9.7	20.2	17.2	6.4	19.3	16.8	20.4	9.8	12.1	9.2	18.9	17.4	18	14.2	6.7	31.1	30.9	6.8	9.4	8.7	7.8	24.1	21.5	27.2	22.1	34.1	29.4	14.4	10.8	23.5	29.5
chrI	10651018	10652951	B0511.2	0.3	0.1	1	0.5	2.5	3.4	2	2.6	2.6	2.7	0.7	1.3	1	0.6	0.7	4.5	5.2	0.8	2.6	1.7	3.3	1	1.5	1.2	3.5	4.2	2	0.8	0.4	3.8	2.5	0.2	1	1.4	1.2	1.8	1.7	1	1.9	5.5	3.3	1.3	0.7	2.7	3.1
chrI	10646750	10647766	B0511.3	0.4	0	0.1	0.1	0.9	0.1	1	0.8	0.5	0.4	0	0	0.1	0.2	0	0	0	0	0.3	0.9	0.1	11.7	10.3	10.1	0	0	0.2	14.6	0	0.1	0	0.9	0	0.1	0	0	0	0	0.4	0.1	0	0	0	0.1	0.1
chrI	10644272	10645606	B0511.4	0	0.1	0	0	1.9	0.7	3.1	1.5	0.8	1.4	0.1	0.2	0.1	0	0.1	0.2	0	0	1.1	2.3	1.6	34	28.9	31.8	0.3	0.2	0.7	32	0	0.1	0.8	0	0	0	0.1	0.3	0	0.2	0	0.2	0	0	0.1	0	0
chrI	10628731	10631662	B0511.5	4.7	2.1	5.5	4.1	0.6	0.2	1.9	0.8	0.6	0.9	4.5	4.3	10.5	2.4	1.6	0	0.6	4.1	0.6	1.1	1	1	0.8	0.7	0.2	0.3	0.9	1.6	3.1	3.1	12.4	1.8	1.6	3.5	2	6.4	19.3	16.6	29.5	1.7	5.6	6.3	3	14.3	8.8
chrI	10624452	10628376	B0511.6	111.4	120.7	157.3	74.5	60.2	56	60.5	69.5	57.6	75	75.6	76	72.3	116.6	66.1	134.1	151.1	61.1	47.4	50	50.1	56.9	40.9	37.8	130.3	145.5	47.9	53.9	70.1	147.3	159.1	92	71.1	74.7	70.4	138.2	102.7	115.6	111.1	191.8	136.1	59.7	90.6	145.4	128.2
chrI	10631639	10633141	B0511.7	12.6	9	18.4	11	38.3	37.5	32.6	43.1	40.3	43.4	14.5	17.1	15	12.1	11.3	140.1	133.6	12.1	27.7	20.8	31.8	17.8	17.6	15.7	134.7	128	25.4	19.9	10	75.2	62.6	12.7	16.9	16	15.9	73.8	52.8	53.2	46.9	66.8	64.6	10	11.6	48.3	66.9
chrI	10636681	10638966	B0511.8	46.4	28.3	53.3	40.7	42.9	45.5	41.6	50.9	47.8	54	57.1	55.8	48.7	49	55.7	14.8	11.2	47.3	35.2	39.9	38.4	25.9	26.4	22.2	13.2	13.7	30.7	33.6	42.3	27.1	21.2	42.1	47.6	52.3	55.2	25.8	25.3	28.5	25	26.8	32.8	35.4	51.2	25.3	22.6
chrI	10639074	10640219	B0511.9	24.5	17.9	23	21.9	116.3	140.7	104.8	130.4	126.9	121.1	34.6	24.6	32.5	25.4	25.2	245.1	222	19.4	109.6	103.2	104.6	48.8	50.7	47	224.8	228.4	104.1	54.3	26.6	187.1	109.4	36.7	26	33.9	31.3	144.5	110.1	111.7	110.8	199.2	154.3	33.6	44.6	105.4	130.5
chrIV	13888063	13893956	B0513.1	42.2	35.9	46.5	39.9	32.5	33.1	27.4	33.6	30.2	33.5	39.8	34.8	37.1	58	46.3	229.1	247.6	31.7	29.6	32.5	28.9	29.1	30.9	26.9	245.3	239.5	32.5	32.7	44.4	224.9	164.9	50.5	39.2	37.2	38.6	223.3	173.4	179.7	167	259.7	209.2	105.9	57.9	232.7	301.8
chrIV	13882706	13884152	B0513.2	41.5	17.2	46.1	26.9	107	102.4	92.6	111	100.5	110.2	37.1	32.8	39.5	29	39.9	245.6	241.4	33.9	95	88.5	98.6	69.7	73.8	77.9	250.1	250	97.7	72.6	21.8	141.9	131.8	22.3	28.8	42.4	35.5	127.2	107	93.6	76.3	120.3	145.4	44.3	48.7	80.1	130
chrIV	13882168	13882638	B0513.3	19539.1	32097.7	12985.3	44671.4	32564.5	33334.8	32463.3	35262.1	27973.6	41291.7	34390.1	25809.8	30403.4	23037.3	34045.6	4939	6775.5	28271.3	37297.4	37755.8	43637.7	22632.9	26699.9	29680.5	4945	5959.7	33676.4	15439.6	45211.3	11598.8	20337.8	23490.1	40407.9	73565.3	70818.8	22857	35349.8	10906.1	13401.7	11775.3	11607.9	46260.8	38195.9	24318.9	24916
chrIV	13880112	13881517	B0513.4	0	2.7	0.5	1.8	310.6	340.7	250.8	323.6	280	385.7	82.5	0.4	43.6	1.1	1.2	0	0	20.1	198.4	176.8	219.4	1	18.2	5.5	0	7.3	218.5	7.1	3	0.6	4.7	280.9	65.5	9.7	1.2	1.8	1.3	2.1	1.1	0.7	1.6	14.1	48.8	1.9	2.5
chrIV	13868528	13876592	B0513.5	20.2	19.8	33.7	19.7	13	11.1	14.1	15.2	11.7	15.8	20.4	18.2	21.5	22.7	25.8	0.7	0.6	19.9	13	15.3	14	29.9	34	26	1.5	0.7	10.5	31.8	19.9	1.1	7.4	12.1	21.4	18.6	19.7	1.9	4.3	4.7	9.4	0.7	2	22.1	20.8	5.9	3.9
chrIV	13854329	13857326	B0513.6	0.1	0	0	0	0.6	0.1	0.4	0.4	0.1	0.2	0	0.1	0	0.1	0	0.1	0.3	0	0.2	0.4	0.2	4.9	4.9	5.1	0.3	0.4	0.3	5.6	0	0	0.3	0	0	0	0	0	0	0	0.1	0.1	0.1	0	0	0.1	0.2
chrIV	13860118	13865269	B0513.9	30.3	70.9	43.9	28.8	34.5	19.3	30.9	31.1	21.1	27	23.5	22.4	33.6	69.6	54.2	0	0	24.7	26.2	38.1	22	56.9	53.9	52.9	0	0.3	23.3	52.5	31.8	4.4	48.9	67	46.3	51.9	75.8	2.9	11.1	4	16	1.6	7.1	35.1	31.2	27.7	22.9
chrIII	8671622	8673545	B0523.1	0	0.1	0	0	1.4	0.5	1.3	1.1	0.5	1.1	0.1	0.1	0	0	0	1.2	0	0.1	0.7	1.2	1.2	29.8	23.5	28.1	0.3	0.6	0.8	26.4	0	0	0.2	0	0.1	0	0	0.1	0	0.1	0.1	0.1	0.3	0	0	0.1	0.2
chrIII	8670463	8674970	B0523.3	5.6	2.2	4.7	3.8	19.8	19.2	18.8	20.9	18.8	21.2	7.2	9.3	5.2	3.4	3.4	13.4	12.8	2.3	12.9	11.5	13.9	9.2	9.3	7.7	13.1	12.8	12.5	11.4	3.8	6.5	6.6	5.8	4.3	5.3	4.5	5.8	4	3.6	4.6	3.9	5.9	1.4	4.1	2.9	4.2
chrIII	8675216	8683612	B0523.5	13.9	7.5	20.5	10	17.4	15.9	16.2	18.4	17.3	20.4	9.3	10.6	8.6	10.1	8.1	28.4	26.7	6.3	13.9	12	14.4	12.9	14.2	12.2	26.9	26.9	12.4	19.9	9.7	25.2	25.6	11.2	9.3	9.6	8.9	23.1	15.9	25.5	26	25.6	24.9	11.2	8.8	22.3	23.3
chrIII	1894092	1899847	B0524.2	0	0	0	0	1.5	0.4	1.4	0.9	0.7	0.6	0	0	0	0	0	0	0	0	0.8	0.9	0.8	11.7	11.2	10.9	0	0	0.6	12.2	0	0.1	0	0	0	0	0	0	0.1	0	0	0	0	0	0	0	0.1
chrIII	1887548	1889682	B0524.3	0	0	0	0	0.1	0	0.1	0.1	0	0.1	0	0	0	0	0	0	0	0	0	0	0	0.3	0.1	0.4	0	0	0.1	0.2	0	0.1	0.2	0	0	0	0	0	0	0	0.1	0	0.1	0.1	0	0.1	0.1
chrIII	1883597	1886209	B0524.4	0	0	0	0	0.2	0.1	0.6	0.2	0.1	0.3	0	0	0	0	0	0	0	0	0.1	0.3	0.1	3.4	3.8	4.6	0	0	0.2	3.7	0	0	0	0	0	0	0	0	0	0	0	0	0	0	0	0	0
chrIII	1891373	1893833	B0524.5	0	0.2	0	0	4.4	1.6	4.3	3.7	3.6	2.1	0	0.2	0	0.2	0	0	0.7	0	3.9	7	2.6	84.1	71.3	71.2	0	0	2.7	62.7	0.3	0	0.3	0	0	0	0	0	0	0	0	0.3	0	0	0	0	0.2
chrIII	1902183	1905631	B0524.6	24.2	14.4	32	17.3	49.4	50.1	46.1	55.4	53.7	55.1	22.8	28.2	25.1	26.9	23.6	31	36.7	26.5	45.4	41.5	39.9	29.2	31.4	23.5	34.9	33.7	40.5	29.1	15.7	29.1	28.7	14.4	28.6	23.5	22.2	27.9	22.9	30.2	26.8	31.1	31.8	19.8	28.9	23.1	20.6
chrIV	92015	110924	B0545.1	58.9	37.4	53.4	36.5	7.8	5.9	10.4	7.9	6.5	7.8	22.9	27.1	27.5	33.2	27.7	14.9	12	33.2	5.7	9.7	6.4	20.4	17.1	16.7	14.1	13.4	6	24.5	30.9	27	39.7	36.1	34.1	30.4	28.9	44.7	56.2	65.9	75.8	33.5	36.9	48.2	34.6	47.7	37.3
chrIV	86874	90082	B0545.3	0	0.1	0	0	1.7	0.6	1.8	1.7	1	1	0	0	0	0	0	0	0	0.1	0.8	3.2	1.3	32	30.6	38.4	0.1	0	0.9	30	0.1	0.1	0.2	0	0	0	0.1	0	0	0	0.1	0	0	0	0	0.2	0.1
chrIV	109053	109943	B0545.4	0.6	0.3	0	0.2	2.9	2.4	4	2.4	3.1	3.9	0.1	0.2	0.1	0.1	0	0	0	0.1	1.3	1.7	1.4	0	0.2	0.3	0	0.1	2	0.4	0	0.1	0.1	0	0.2	0.1	0.3	0.8	0.5	0.2	0	0.1	0.1	0	0.1	0.1	0.2
chrIV	3385634	3386904	B0546.1	337.1	723	330	1168.8	916.3	846.6	947.1	811.7	774.2	862	1051.8	1086.8	1172	1185.3	1201.5	1009	876.9	1161.6	934.4	1025.2	998.5	1257.2	1240.6	1115.1	1003.2	908.2	869.1	904.2	1307.6	642.9	526.5	1269.7	1450.3	1438.7	1283.6	940.1	1052.6	707.2	622.8	609.5	532.5	702.5	876.4	525.1	534.1
chrIV	3373390	3378129	B0546.2	15.6	18.5	13.4	15.8	52.8	49.2	47.2	52.9	51.1	50.4	17.1	18.9	17	17.8	13.6	136.5	125.2	11.5	41	37.3	37.5	26.7	25.4	22.3	144.8	140.8	34	30.3	20.6	95.7	77.4	16	15.9	13.6	14	68.5	58.4	61.8	61.7	91.7	73.9	17.6	13.5	54.5	63.7
chrIV	3378787	3382831	B0546.3	23.3	25.6	20.9	20.6	11.8	14	17.4	19.4	12.7	17.3	17.2	18.3	16.7	17.3	13.7	4.3	5.1	12.9	11.4	11.1	13.7	24.6	20.4	15.1	4.5	4.1	11.7	23.4	20.4	8.5	12.8	26.3	16	15.6	14.9	12.2	14	11.4	15	13.8	10.5	13.7	10.6	13.4	14.1
chrIV	3382944	3384144	B0546.4	22.7	63.2	23.7	34.1	23.5	23.9	24.2	28.2	18	28.5	22.6	21	20.1	35.5	16.9	33	30.6	13.2	15.9	22.5	17.8	51.9	36	28.4	37.1	35.7	17.7	29.1	44.7	45.7	72.1	41.7	22.1	17.6	21.9	46.2	59.4	58.4	67.3	44.2	42.8	20.5	10.9	60	56.6
chrIV	3388072	3390084	B0546.5	0	0	0	0	0	0.1	0	0	0	0	0.1	0	0	0	0	0	0	0.1	0	0	0	0.1	0.1	0	0	0	0	0.1	0	0	0.1	0.1	0.1	0.1	0.1	0	0	0	0	0	0	0	0.1	0	0.1
chrIV	5649519	5651070	B0547.1	18	15.4	20.7	18.3	43.4	48.8	40.4	47.2	46.6	51.2	24.7	24.5	20.5	17.7	20.6	62.9	66.6	13.1	43	41.7	43.8	35.5	31.5	31.7	58.4	66.2	39.6	42.4	18	80.4	58.9	15.4	22.9	20.7	21.8	49.7	44.7	47.3	42.7	65.8	64.3	17.9	20.9	56.3	55.3
chrIV	5645819	5646222	B0547.2	0	0	0	0	0	0	0	0	0	0	0	0	0	0	0	0	0	0	0	0	0	0	0	0	0	0	0	0	0	0	0	0	0	0	0	0	0	0	0	0	0	0	0	0	2.6
chrIV	5643240	5645603	B0547.4	0.3	0.2	0.4	0	0	0	0	0	0	0	0.6	0.5	0	0.1	0.1	0	0	0	0	0	0	0	0	0	0	0	0	0	0	0.1	0.1	0	0.1	0.3	0	0	0.1	0.1	0.3	0	0.1	0.1	0	0.1	0.3
chrV	438401	438675	B0554.1	0	0	0	0	0	0	1.3	0	0	0	0	0	0	0	0	0	0	0	0	0	0	0	0	0	0	0	0	0	0	0	0	0	0	1.6	0	0	0	0	0	1.8	0	0	0	2	0
chrV	434768	436727	B0554.2	0	0	0	0	0	0	0	0	0	0	0	0	0	0	0	0	0.2	0	0	0	0	0	0	0	0	0	0	0	0	0.1	0.1	0	0	0	0	0.1	0.1	0	0	0.1	0	0	0	0	0.2
chrV	434148	434402	B0554.3	0	0	0	0	0	0	0	0	0	0	0	0	0	0	0	0	0	0	0	0	0	0	0	0	0	0	0	0	0	0	0	0	0	0	0	0	0	0	0	0	0	0	0	0	0
chrV	430612	433575	B0554.4	0.1	0.1	0.1	0.1	0	0	0	0	0	0	0.4	0.5	0	0	0	0	0	0	0	0.1	0	0.1	0.1	0	0	0	0	0.1	0	0	0.3	0.2	0	0	0	0.6	0.2	0.1	0.2	0.2	0	0.2	0.1	0.1	0.5
chrV	424440	426561	B0554.5	2.1	2	1.3	2	0.5	0.4	0.8	0.5	0.2	0.3	2.7	2.8	2.2	5.2	2.1	0	0	1.8	0.3	0.3	0.6	2.4	1.6	0.6	0	0	0.3	2.8	2.5	0	0.6	2.8	2.9	3.4	4	0	0.1	0.1	1.1	0	0	2.7	2.5	0.6	0.2
chrV	422498	424167	B0554.6	0.6	3.2	1.5	0.5	0.4	0.3	0.2	0.3	0.5	0.4	1	0.4	0.9	1.7	2.1	0.2	0	0.4	0.2	0.8	0.1	0.5	0.9	2.2	0	0	0	0.5	2.7	0	3.2	0.9	1.8	1.3	4.3	0.2	0.3	0.5	0.1	0	0.2	5.4	2.4	3.2	2.1
chrV	437576	441024	B0554.7	1.1	1.1	0.8	1.3	0.1	0	0.2	0	0.2	0.1	1	1	0.6	2	1	0	1.4	0.9	0	0.2	0.1	0.2	0.2	0.1	0.7	0.7	0.1	0.1	1.3	0.4	0.4	1.4	1.6	1	1	0.3	0.4	0.3	0.4	0.4	0.2	0.9	1.2	0.6	0.4
chrX	9171504	9172147	B0563.1	0.3	0	0	0.5	0.1	0.4	0.2	0.6	0.3	0.4	0.5	0.2	0	0	0	29.2	26.5	0	0.3	0	0.4	0.2	0	0.3	26.5	27.1	0.8	1	0	10.1	10.1	0	0.3	0	0	6.2	3.3	3.7	2.7	7.8	9	0	0	4.5	6.3
chrX	9166690	9167199	B0563.10	0	0	0	0	1.8	0.7	1.6	0	0	0.2	0	0	0	0	0	0	0	0	0	0	0	0	0	1.1	0.6	0	0.3	0.6	0	0	1.1	0	0	0.8	0.6	0	0	0	0	0	0	0	0	0.4	0
chrX	9163106	9165912	B0563.2	1.3	1.4	2.5	2.7	2.3	2.2	2.1	1.7	1.6	1.1	3.3	2.6	4.1	6	5.4	0.5	0	2.6	1.4	2.4	1.1	1.8	4.9	2.8	0.3	0.1	1	6.3	3.3	5.5	12.1	3.9	4.8	5.7	5.5	14.6	13.5	12.9	13.2	6.6	11.3	6.2	7	16	10.3
chrX	9150634	9160597	B0563.4	59.1	67.6	62.8	67.7	53.8	44.3	56.1	42.6	40.1	43.1	77	73.3	70.2	73.2	63.2	37.6	36	42.9	37.6	44.9	40.4	80.6	70.7	67	38.2	37.2	34.5	93.6	84.8	54.7	57.5	83.1	72.7	77.5	79.7	60.1	61.7	80.6	72	49.2	59.3	82.5	68.8	77.2	62.6
chrX	9146058	9147498	B0563.5	0.4	9.9	1.1	1.2	7.1	5	10.4	5.8	3.7	8.5	0.3	2.5	1.1	3	1.2	0	0	0.3	3.7	9.4	5.2	2.7	3.5	1.7	0	0	5.9	4.2	1.3	0.2	0.6	0	1.1	3.3	2.4	0.3	1.1	1.3	0	0	0.2	1.7	0.4	0.5	0.5
chrX	9137869	9145538	B0563.6	6.4	9	9.6	3.6	1.6	1.1	1.4	1.7	1.4	1.3	2.5	2.4	3	7	4.1	3.1	1.9	3.5	1.3	1.3	1.1	1	0.9	1	2	2.5	0.5	2.1	2.7	1.9	6.2	2.2	3.2	3.5	3.5	2.9	4.6	3.5	4.8	4.8	2.4	7.4	5.9	4.3	3.4
chrX	9152377	9154127	B0563.7	7.6	5.2	8.1	3	1.9	0.8	0.3	0.4	0.7	1	1.2	2.2	2.1	3.5	2.2	0	0	2.4	0.8	2.1	0.8	5.6	3.2	4	0	0	0.5	3	2.2	0.5	2.2	3.2	2.2	4	2.8	1.3	2	1.4	2.9	1	1	3.8	2.9	2.9	1.1
chrX	9173627	9174433	B0563.8	0	0	0	0	2.4	1.4	0.9	2.1	0	0	0	0	0	0.6	0	100.2	143.8	0	0.7	0.7	1.5	1.2	0	0	92.2	91.5	2.3	0	0	85.6	30.4	0	0	0	0	30.4	48	26.1	11.4	36.5	46.9	1.9	0	24.8	35.2
chrX	9168481	9168965	B0563.9	0	13.4	0	3.7	2.3	1	0	0	0	2.2	0	0	0	0	1.3	0	0	0	0	0	0	8.3	23.6	27.9	0	0	0	41.9	5.2	1.1	0	0	4.4	10.7	3.2	0	0	0	0	0	0	0	0	0	0
chrIV	13098953	13100592	B0564.1	51.3	32.5	56.1	63.9	93.8	104.5	88	107.3	99.3	111.3	97.6	94.7	91.4	62	78.5	116	122.2	73.4	84.6	87.6	77.7	57.4	51	43.1	106.1	104.1	66.2	62.7	70.4	90.5	107.1	74.6	102.8	96.5	96.1	73.9	63.6	57.7	58.6	110.8	74.9	135.6	77.5	95.5	109.3
chrIV	13119071	13124363	B0564.10	4.6	5.9	3.7	7.1	1.5	0.8	1	1.3	0.7	1.4	4.3	4.6	5.6	11.4	8.6	18.4	22	7.3	0.8	1.3	0.8	1.7	1.7	2	19.6	25	1.3	3.2	8.7	20.6	23.6	7.7	5.3	6.1	7.1	30.6	31.9	34.8	33.6	24.8	29.4	28.3	13.5	39.8	36.6
chrIV	13105298	13106902	B0564.11	8.2	7.7	9.1	8.2	26.4	25.6	26.4	29.7	26.3	27.6	10.4	13.8	12.3	9.9	10.4	39.1	31.1	8.3	21.5	22.7	22.1	34	29.1	28.1	39.1	35.4	20.4	45.3	8.4	35.9	48.6	8.6	7.5	11.3	12.4	27	24.7	26.3	28.9	47.9	29.5	21.5	13	28.4	36
chrIV	13107632	13111479	B0564.2	4.3	6.7	4	7.6	13.9	14.8	12.9	18.4	13.7	19.3	8.5	8.4	6.3	5.5	6.9	12.3	13.9	6.2	10.9	9.7	13.3	10.7	9.2	7.6	14.8	15.6	11.2	10.1	7.6	9.8	13.5	9.4	8.3	9.9	8.4	10.9	13.6	10.5	9.9	11.5	7.7	9.7	6	10.8	12.7
chrIV	13108115	13109775	B0564.3	2.4	20.6	5	5.3	1.9	0.8	2.1	1	0.4	1.6	2.1	2.7	2.9	12	4.8	0.2	0	1.5	0.7	1.4	0.7	8.3	3	3.9	0.2	0.1	0.7	8.2	8.2	0.8	4.8	5.8	4.7	3.7	6.7	1	1	1.6	1.2	0.6	1	2.4	2.1	3.6	2.3
chrIV	13111495	13113058	B0564.4	0.2	2.1	0.3	0.5	0	0.1	0.1	0.2	0	0.2	0.2	0.1	0.3	1.4	0.3	0.2	0.2	0.1	0.1	0	0	1	0.4	0.5	0.1	0.1	0	0.9	0.3	0.1	0.7	0.4	0.5	0.3	0.7	0	0	0.1	0.5	0.1	0.1	0.3	0.2	0.5	0.1
chrIV	13129627	13133206	B0564.6	6.6	4.7	8.1	2.9	2.4	1.1	2.8	2.4	1.9	1.9	3	3.3	3.7	3.8	2.9	0	0	2.7	1	2.7	1.1	3.9	2.9	2.3	0	0	1.1	5.8	4.2	2.5	7.9	4.2	2.9	2.7	2	5.9	8	8.5	12.1	2.7	4.7	6.5	4.4	10.9	7.6
chrIV	13100688	13104855	B0564.7	21	10	26.5	15.1	29.2	26.5	23.2	27.9	25.1	27.7	20.4	19.8	18.5	20.1	20.9	14.8	15.2	17.1	18	17.7	16.4	13.6	12.5	10.3	14.5	15.4	17.8	15.8	16.4	22.2	21.8	14.3	17.7	18.7	19.1	15.7	15.6	18.6	16.8	20.2	18	23.3	21.1	19.1	20
chrIV	13135219	13138798	B0564.9	5.2	3.7	6.3	2.3	1.9	0.9	2.2	1.9	1.5	1.5	2.3	2.6	2.9	3	2.7	0	0	2.1	0.8	2.1	0.8	3	2.3	1.8	0	0	0.8	4.5	3.3	1.9	6.2	3.3	2.2	2.1	1.6	4.7	6.2	6.6	9.5	2.1	3.7	5.1	3.4	8.5	5.9
chrIII	1037498	1046264	BE0003N10.1	7.2	4.3	7.9	6	12.8	13.8	12.1	13.8	15.7	14.3	10.8	11.8	10.7	9.2	10.2	10.4	10	10.7	11.9	11	10.6	7.8	6.2	6.4	12.4	10.7	11.7	8	6	8.9	4.9	6.8	9.7	8.6	7.9	9	8.1	5.8	8.5	7.2	7.5	7.5	10.3	7.7	8.4
chrIII	1031303	1037202	BE0003N10.2	12.3	4.8	10.5	6.7	26.5	32.6	26.8	30.2	30.8	32.3	7.4	9.7	9	7.9	8.4	21	22.9	7.1	23.9	16.4	22.3	4.9	5.1	4.2	23.6	20.3	21.3	5.8	7	19.8	17.1	7.6	9.5	10.6	9.4	20.6	14.8	14.7	14.3	21.7	15.3	5.8	8.2	15.4	16.6
chrIII	1046237	1060000	BE0003N10.3	1.3	1.3	1.7	2.6	0.7	0.6	0.6	0.6	0.6	0.7	2.6	2.9	4.8	3.3	4.1	0.7	1.1	2.3	0.7	0.6	0.6	0.4	0.2	0.4	0.8	1	0.7	0.6	3.1	7.4	7.3	2.2	3	3.4	2.6	10.2	10.2	9.8	9.2	10.7	7.6	2.7	1.5	9.8	8.3
chrIII	12787577	12789376	BE10.1	0	0	0	0	6.7	2.3	8.1	3.3	3	4.2	0.1	0.1	0	0	0	0	0	0	3.7	9.3	4.2	92.7	94.6	99.4	0.3	0.3	3.9	95.6	0	0.1	0.1	0	0	0	0	0.2	0	0.1	0	0	0	0	0	0	0
chrIII	12793282	12798056	BE10.2	64.9	15.4	39.6	55.2	2.3	0.6	3	3.5	1	2.5	37.3	42.7	7.4	12.3	6.5	0.6	0	35.4	0.6	4.6	0.4	0.2	0.1	0.1	0.3	0.2	0.8	0.3	27.4	11	20	31	27.6	30.6	11.1	29.8	41	47.5	55.5	9.8	21.3	62.8	18.9	29	23.1
chrIII	12807989	12811549	BE10.3	0	0.1	0	0.1	0.1	0.3	0.1	0.7	0.2	0.6	0.1	0.1	0	0	0	17.7	22.3	0	0	0.1	0	0.2	0	0.1	17.2	18	0	0.1	0	9.8	9.6	0.4	0.1	0	0	6.9	3.1	3.8	5.4	5.4	5.9	0	0	4.3	6
chrIII	12813413	12816697	BE10.4	1.2	0.6	1	0.4	0.7	0.4	0.2	0.3	0.3	0.7	1	1.1	1.9	3.1	0.8	6.5	5.3	0.8	0.6	0.7	0.4	0.8	0.8	0.6	4.2	4.3	0.6	1.1	0.3	2.3	1.9	0.3	0.8	0.7	1.5	1.6	1.4	2.4	3.2	1.1	1.4	0.3	2.3	1.9	2.7
chrIII	12806108	12806754	BE10.5	0	0	0	0	4.2	1.4	8	2	3.3	2.9	0	0	0	0	0	1.1	0	0	1	3.7	1.5	46.3	37.3	42.9	3.8	6.5	0.4	48.3	0	4	4.2	0	0	0	0	1.4	1.9	1	2.4	1	2.1	0	0	1.3	3.7
chrI	13408785	13411440	C01A2.1	0.1	0.3	0.3	0.1	0.2	0.1	0.1	0.1	0.2	0.3	0.3	0.4	0.6	0.2	0.3	2.5	2.8	0.1	0	0	0	0.1	0.1	0.2	1.7	2.7	0.1	0.3	0.4	2.3	6.6	0.2	0.2	0.2	0.2	1.3	0.9	1.3	2	1.8	2.7	0.5	0.2	1.8	2.4
chrI	13397256	13398517	C01A2.2	79.1	81.3	110.7	85.8	11.5	4.7	12.5	6.8	3.9	13.8	89	57.6	49.3	78.5	64.4	1.6	4.5	30.1	5.3	10.9	15.9	19.6	44.5	30.9	3.6	3.3	14.8	28.2	84.7	57.4	79	70.4	112.6	67.7	108.7	161.9	139.6	89.3	73.7	81.8	46.7	113.2	59.9	153.5	59
chrI	13387805	13391439	C01A2.3	37.3	15	35.7	28.3	36.8	35.7	30.4	37	34.9	36.4	48.8	48.3	40.9	31.4	38	17.1	24.9	30	21.7	21.8	23.5	13.6	13.9	12.8	16.9	19.4	20.6	20.7	31.7	23.1	19.9	29.1	43.9	44.3	39.2	24.9	22.2	29.6	29.4	22.9	28.1	25.3	45.2	22.7	19
chrI	13392104	13393990	C01A2.4	47.1	35	55.6	34	38.2	33.9	43.8	37.6	36.3	49.9	24.8	22.3	24.2	26.7	24.1	52.3	47.2	18.6	33.6	28.4	37.3	68.5	57.3	55.4	57.9	57.6	35.1	51.5	41.1	48.7	94.4	22.7	30	29.3	37.3	52.9	53.9	50.1	50.6	43.2	53.8	27.5	25.9	82	73.2
chrI	13384740	13387073	C01A2.5	22	14.6	31.9	19.8	27.8	31	30.2	34.4	30.3	37.2	24.2	22.7	16.7	19.6	17.2	103.1	105.2	13.8	28.2	24.4	27.3	18.6	18.4	17.8	101.3	102.7	24.4	20.8	19.9	92.4	85.3	24.9	19.4	18.8	24.5	71.6	67.1	67.7	62.3	92.4	82.7	15.9	17.8	70.3	79.5
chrI	13379905	13384360	C01A2.6	0	0	0	0.3	0.1	0	0.4	0.4	0.2	0.5	0.5	0.1	0.4	0	0	0	0.4	0.2	0.4	0.2	0.3	2	1.2	3.3	0.1	0.6	0.1	2.6	0.8	0.1	0.5	0	0	0	0.4	0	0.2	0	0.4	0.2	0.1	0.6	0.3	0.4	0.4
chrI	13402435	13404088	C01A2.7	38.7	37.1	54.8	30.5	6.4	3.2	5	5.5	3	4.5	26.9	24.8	20.4	72	40.6	4.4	8.7	23.7	3.1	5.5	4.4	38.6	26.9	29	2.6	5.5	3.8	39.5	39.1	8.3	16.7	33.3	28.8	23	31.9	14.5	23.2	21.3	27.8	5.3	10.9	41.8	45.7	23.9	22
chrI	13376864	13377338	C01A2.9	1.6	0	0	0	1.3	0	0	0	0	0	0	0	0	0	0	0	0	0	0	0.6	0	1.9	5.8	4.6	0	3.8	0	7.2	1.5	0.6	3	0	0	0.9	0.9	0	0	0.8	1.6	1	1.3	0	0	2.8	2.5
chrIV	6624359	6627981	C01B10.10	7	4.5	8.2	6.2	2.6	1.6	2	2.2	1.6	2.3	4.9	4.6	2.4	3.7	3.5	0.2	0.1	2.4	1.7	2.1	2.2	4.1	3.7	4.5	0.3	0.1	2	5	4.4	2.4	3.5	3.5	3.7	4.4	3.3	5.2	4.7	7.4	6.4	3	3.4	5.8	3	5.2	4.2
chrIV	6657967	6660425	C01B10.11	197	59.6	135	229.2	20.2	14.2	18.2	17.2	12.1	17.8	174.1	158.9	31.6	110.1	66.1	0.4	0	118.2	13.5	18.7	16.4	34.9	35.8	37.8	0.5	0.3	13.4	45.4	156.4	95.1	162.8	158.8	133.7	140.6	114.4	194.8	201.5	270.1	227.4	150.2	158.6	263.4	120.8	196.2	159.2
chrIV	6619031	6621341	C01B10.3	14.8	8.5	18.2	6.6	18.2	12.2	13.4	12.6	14.4	13.6	12.7	12.9	10.9	9.6	9.7	0.7	0	4.8	8.8	10.5	10.4	9.4	16	12.7	0.5	0.2	9	18.5	10	0.5	6.9	9	13	13.6	12.9	0.5	1.1	1.5	2.9	0.7	1.4	9.5	9.6	4.6	3.3
chrIV	6628341	6631734	C01B10.4	2.8	1.5	3.1	1.5	1.9	1.4	1.8	1.5	1.3	1.8	2.3	2.1	1.4	1.3	0.9	0	0	0.4	0.9	1.2	0.9	1.5	1.7	1.4	0.2	0.2	0.6	2.5	1.5	0.9	0.6	2	1.1	1.6	1	0.9	1.6	1.7	1.1	1	0.8	0.7	0.8	1.2	0.9
chrIV	6623678	6624482	C01B10.44	0	0	0.1	0	1.1	0.3	0.3	0.4	0.1	0.1	0	0.2	0	0.1	0.1	0	0	0	0	0.6	0.4	7.4	8.4	6.3	0.1	0	0.4	7.7	0.2	0	0.2	1.1	0	0	0.1	0	0	0.1	0	0	0	0	0	0	0
chrIV	6646022	6646928	C01B10.5	14.8	20	17.8	51.2	13.1	2.9	3.9	29.5	4.9	19.6	32.9	23.4	7.3	142.7	36.2	19.2	10.7	38.1	0.4	7.8	1.4	3.5	4.7	3	22	10.1	0.8	20.8	64.7	2173.3	2604.4	133.1	45	35.8	40.1	4126.4	7374	5853.4	4217.1	2805.2	3885.4	335	121.6	5709.1	5114
chrIV	6640149	6645341	C01B10.6	139.6	83.9	116.1	158.2	233.5	166.6	184.5	155.8	155.8	146.8	156.3	150.6	170.7	173.1	190.4	0.2	0.2	132.8	182.9	318.1	115.8	192.1	318.6	320.5	0.2	0.3	122.3	253.9	230.4	15	34.6	203.3	235.3	319.2	317	34	49	57.8	70.6	16.8	29.4	205	212.3	53.3	37.3
chrIV	6638544	6639253	C01B10.7	4.7	0.9	2.3	2.5	0.3	0.9	1.1	0.6	0.7	0	2.8	4.6	1.1	1.8	4.5	0	0	4.3	0.4	1.1	0	0	0.8	1	0	0	0.7	0	3.4	0.2	0.3	1.4	4.8	6.8	11.2	0	0	0	0	0	0	4.1	3.3	0	0
chrIV	6635027	6638147	C01B10.8	19.6	10.5	20.8	14.5	28.7	28.5	26	31.5	29	34.7	22.5	25.7	19.8	18.8	17.4	32.6	25.8	15.4	23.6	19.2	23.2	10.3	10.2	9.2	31	26.9	22	14.8	12.6	17.6	14.7	17.9	19.2	18.7	18.3	12.7	7.4	11.5	12.1	12	14.3	20.9	23.8	9.7	11
chrIV	6632210	6634987	C01B10.9	14.5	12	19.3	9	21.3	19.2	18.8	21.3	19.7	20.7	10.7	10.5	10.8	10.6	10.7	22.9	19.4	7	16.3	13.8	16.9	11.3	9.1	8.7	19.8	19.2	13.7	15.1	12.8	14.2	12	10.5	10.3	9.7	10.9	12	9.5	12	13.9	12.9	12.7	14.7	13.7	11.4	11.3
chrII	23327	24457	C01B12.1	709.8	235	347.6	1598.3	25.7	2.8	26.2	33.4	6.3	26.4	940.7	959.5	168.6	309.6	261.5	0	0	1148.1	7.2	63.8	5.8	0.5	1.7	2	0.3	0.5	3.3	0.4	725.5	0.9	1.5	876.6	725.5	699.7	344.6	1.6	0.8	1.3	2	1.3	0.7	1415.5	457.1	2.4	1
chrII	19537	22170	C01B12.2	41.3	29.2	50.8	27.3	11.3	8.4	10.6	12.1	8.5	11.7	23.1	18.3	23.9	42.3	30.5	15.5	17.1	11.5	7.9	12.4	7.2	12.8	14.6	8.2	15.2	18	6.4	14.1	31.3	33.6	38	25	28.8	24.9	32.5	24.9	34.2	44.3	33.8	51.7	34.3	35.8	23.8	33.8	30.6
chrII	12984	16001	C01B12.3	3.6	7.6	5.5	6.4	1.5	0.9	1.4	1.4	0.9	1.2	4.2	4.3	2.8	5.7	4.5	0.1	0	3.5	0.7	1	1.3	2.4	3.2	2.3	0.1	0.1	1	3.1	6.2	3.3	9.2	6.6	4.2	4.5	5.2	5.6	4.8	9.3	7.1	4.9	6.1	4.7	2.6	11.4	7.9
chrII	6663	9233	C01B12.4	0.9	0.7	0.5	0.9	0.8	0.2	0.8	0.4	0.4	0.8	1	0.5	0.6	1.4	1	0	0.3	0.4	0.3	1	0.5	9.1	7.3	9.6	0.1	0.2	0.3	14.8	1.1	0.4	1	0.9	0.3	0.4	0.9	1	1.1	1.3	1	0.3	1.1	0.8	1.2	1.6	0.7
chrII	9807	11846	C01B12.5	1.4	0.8	1.4	1.4	0.6	0.3	0.5	0.4	0.3	0.4	1	1.8	1.3	1.8	1.4	0	0	1	0.2	0.2	0.2	0.7	1	1	0	0	0.1	0.7	1.3	0.3	0.6	1.8	1	1.5	1.3	0.2	0.3	0.8	1.1	0.1	0.3	0.6	1.7	0.5	0.7
chrII	23880	25435	C01B12.8	3.6	1.7	6.1	6	10.3	8.4	12.3	10.5	8.6	11.4	4.7	3.7	2.5	2.7	2.1	24.7	23	3.2	10.6	12.1	13.1	17.7	17.9	18.7	23.2	21.8	11.8	14.6	2.6	14	9.9	4.6	3.1	3	1.5	13.9	12.6	9.7	7.8	13.7	8	3	1.6	7.3	10.2
chrV	2517528	2521770	C01B4.1	0	0	0	0.1	0	0	0	0	0	0	0	0	0	0	0	0.6	0.2	0	0	0	0	0	0	0	0.4	0.8	0	0	0	0.1	0	0	0	0	0	0	0.1	0.1	0	0.1	0.1	0	0	0.1	0
chrV	2514232	2515592	C01B4.10	0	0	0	0	0	0	0	0	0	0	0	0	0	0	0	0.4	0.8	0	0	0	0	0	0	0	0.3	0.1	0	0	0	0	0	0	0	0	0	0	0	0	0	0	0	0	0	0	0
chrV	2509634	2513267	C01B4.3	0	0.1	0.1	0.1	0	0.1	0.1	0	0	0.1	0	0.1	0.1	0.1	0	0	0	0	0.1	0.2	0.1	0.1	0	0.1	0	0.1	0.1	0.3	0.2	0	0.4	0	0.1	0	0.2	0	0	0	0	0	0.1	0.2	0	0.1	0.1
chrV	2502762	2504913	C01B4.5	0.2	0.3	0.4	0	0.3	0.1	0.1	0.2	0.1	0.1	0.1	0.1	0.1	0.2	0.1	0.5	0.3	0	0.3	0.6	0.5	0.1	0.3	0.1	0.4	0.4	0	0.7	0.1	0.1	0.5	0	0.1	0.1	0.1	0	0.1	0.2	0	0.2	0.1	0.3	0.1	0.3	0.2
chrV	2501049	2502425	C01B4.6	6.8	7	4.5	2.7	9.3	9	8.8	7.9	8.2	9.5	6.7	5.2	11	3.6	5.7	43	38.6	3.1	21.7	27	19.2	11.6	18.6	11.9	40.9	40.6	19.2	17.7	4.6	11.1	10.2	4.1	5.9	4.2	5.9	9.5	7.3	6.7	5.8	11.3	10	1.7	6	8.7	11.2
chrV	2494233	2499000	C01B4.7	9.6	7.1	6.9	3	2	1.8	2.2	2.6	2.4	2.1	6.7	8.2	10.2	6.4	2.9	1.8	2.7	1.6	5	7.5	4.9	15.1	5.9	6.2	2.1	2.5	4.7	22.3	6.1	0.7	8.9	5.1	2.8	3.2	3.7	1.4	1.1	1.1	0.8	2.8	1.4	3	3.5	16.8	9.4
chrV	2490510	2492700	C01B4.8	3.7	2.5	3.6	1.1	0.4	0.2	0.3	0.5	0.2	0.3	3.5	2.9	2.1	1.1	0.7	1.2	1	0.8	0.6	1	1.2	2.1	1	1.4	0.9	0.8	0.9	4.1	0.9	0.3	0.4	0.9	1.3	1.1	1.4	0.2	0.2	0	0.2	0.1	0.1	0.9	1.1	0.3	0.2
chrV	2483002	2487784	C01B4.9	16.5	9.6	13.2	8	41	50.7	41	47.4	46.2	46.2	32	35.2	37.3	8.7	8.3	8.8	8.3	7	107.4	94.9	88.5	82.6	66.2	67.4	9.8	8.9	86.8	99.8	9.6	3.5	5.5	9.8	10.9	11.1	8.6	7.4	6	5.5	7.2	2.9	3	2.9	9.7	7.7	6.1
chrV	8786528	8792753	C01B7.1	24.6	16.6	32.3	30.5	9.3	8.2	7.2	10.8	8.5	10.5	37.5	37	36.8	41.6	35.3	18.8	14.9	27.2	7.6	8.6	7.4	15.9	13.7	12.9	19.5	17.3	8.1	22.4	29.6	93.7	83.6	29.9	38.2	34	32.5	105.7	87.7	107.8	125.2	67.2	127.7	42.2	42.6	134.4	125.9
chrV	8783399	8784143	C01B7.3	0.6	0	0	0	0	0	0	0	0	0	0	0	0	0	0	0	0	0	0	0	0	0	0	0	0	0	0	0	0	0	0.3	0	0	0	0	0	0.5	0.3	0	0	0.3	0	0	0.7	0.7
chrV	8792673	8795545	C01B7.4	16	7.6	17.2	9.7	3.3	2.3	3	2.6	1.6	2	7.2	7.4	6.6	7.7	6.2	2.7	2.6	5.8	1.5	2.1	1.6	2.4	2.9	2.9	2.9	3	1.7	5.2	9.9	9.4	15.1	7.3	6.2	7.9	7.7	10.4	9.2	16	14.8	6.9	12.2	10.7	10.3	16.3	11.9
chrV	8800128	8800974	C01B7.5	1.4	7.4	0.7	4.6	0.6	0.2	0.9	0.5	0.4	0.6	2.6	2.3	2.1	5.8	5.4	0	0	1.8	0.4	0.4	0.7	1.8	0.9	0.8	0	0	0	1.1	2.7	0.8	4.9	3.4	1.9	2.2	3.6	2	2.7	2.6	6.2	1.4	2.3	7.9	3.1	3.5	3.8
chrV	8805393	8819933	C01B7.6	3.6	5	5.8	3.8	1.5	1.3	1.5	1.5	1.3	1.7	3.9	3.8	3.5	4.2	3.8	0.4	0.2	2.7	0.9	0.9	1.1	1.4	1.5	1.3	0.5	0.4	1.1	2.6	3.5	5.8	9.5	4.1	3.3	3.3	2.9	9.4	8.7	11.6	12.1	5.8	9	5.8	4.5	13.4	11.1
chrV	8821843	8822536	C01B7.7	0.6	0.9	0.6	1.2	0.4	0.2	0.1	0.2	0.1	0.1	0.6	1.2	0.7	1.3	0.6	0	0	0.2	0.2	0.2	0.3	0.5	0.7	0.6	0.1	0.1	0.6	1	1	0.1	0.5	0.7	0.9	1.3	1.2	0.1	0	0	0	0	0	1	0.5	0.3	0.1
chrII	13771505	13778956	C01B9.1	4.2	1.5	2.6	2.6	1.5	0.9	1.1	1	0.9	0.9	4.1	4.7	3.7	2.9	3.8	0.1	0.1	2.9	0.6	1.1	0.5	0.1	0.5	0.3	0.1	0.1	0.6	0.8	2.9	0.3	1.5	3.6	3.6	3.8	4.5	1.1	1.6	2.2	2.5	0.4	0.9	4.3	4.2	2.1	1.8
chrII	13770769	13783947	C01B9.4	0	0	0	0	0.7	0.6	4	0.9	0	0	0	0	0	0	0.4	2.8	3.6	0	0.6	0.6	0	2.1	3.1	1.6	0.7	0.7	0	3.4	0	1.3	3.2	0	0	0	0	1.2	2.8	0.8	0	2.2	3.3	0	0	0.6	0
chrX	7431424	7433490	C01C10.1	4.6	9.3	8.8	5.5	2.2	1.4	2.4	0.9	1.2	2.2	7.6	6.5	8.5	7.8	6.4	1.9	0.7	2.4	1	1.1	1.1	1.7	1.5	0.7	2.3	1.4	0.8	1.9	7.7	7.7	16.8	13.2	7.7	7.2	6.8	13.9	16.6	18.1	17.8	9.1	12	8.1	5.9	18.2	11.3
chrX	7435751	7437936	C01C10.2	24.4	34	35.6	30.9	7.7	5.2	6	3.3	4.9	3.6	20.2	18.9	9.7	19.3	11.9	0.9	0.6	10.3	5.8	7.6	6.5	8.3	8.8	7.6	0.6	0.3	5	7.2	21.3	2.1	9.4	13.5	18.4	20.7	16.6	7.2	8.3	9.4	14.3	3.7	5.4	33.7	13	12.6	8.4
chrX	7439353	7442534	C01C10.3	12.7	16.5	14	15.6	10.9	4.1	9.4	7.9	9.7	6.5	11	10.1	15.1	16.9	10.3	8.4	4.4	7.7	5.6	11.8	5.7	24.5	18.6	23.9	6.3	5.9	6.9	24.1	12.3	13.2	19.3	12.5	10.5	7.1	11.4	15.1	18.1	20.2	20.9	26.1	17	13.5	13.2	20.1	16.9
chrX	7433586	7435662	C01C10.4	8.1	15.8	10.2	7.4	3.8	2.7	3.3	2.7	1.8	3.5	12.2	9.8	13.3	12.8	12.6	0.9	1.4	3.9	1.2	3.2	2.2	2.3	3.6	2.2	1.3	1.3	2.5	4.3	12.6	19	31.3	13.5	13.2	12.3	14.4	21.5	34	37	35.5	25.2	30.9	17.2	14.5	38.1	28.5
chrX	3727559	3728424	C01C4.1	23.9	72.3	25.7	33.2	7.1	4.5	7.4	4.8	1.9	6.1	18.8	17	16.7	42.7	28.4	0.4	0	21	4.9	8.5	5.6	32.4	30.8	38.4	0.1	0.3	3.9	33.1	27.7	1.7	8.2	29.9	25.3	31.4	32.8	1.4	5.8	3.6	5.2	1.5	1.6	51.6	23.5	10.5	7.6
chrX	3716300	3718629	C01C4.2	0.3	0.2	0.5	0.2	0.1	0	0.1	0	0.1	0	0.1	0.3	0.4	0.5	0.5	0	0	0.1	0	0.1	0	0.3	0	0.1	0	0	0.1	0.1	0.3	0	0.1	0	0.3	0.3	0.3	0	0.3	0.6	0.9	0.1	0.1	0.2	0.6	0.1	0.2
chrX	3706728	3713318	C01C4.3	16	13.9	15.4	17.7	6.8	4.3	6	4.6	4.2	3.9	15.9	13.6	17.2	26.6	21.8	0.3	0.6	14.4	3.6	6.9	4.3	15.4	14.2	8.9	0.2	0.3	4.7	16.5	17.6	1.2	8	18	17.8	18.8	20.3	2.7	3.5	5.4	6.8	1.5	3.1	21	15.8	5.9	5.6
chrIV	12622060	12630999	C01C7.1	21.8	11	24.3	17.4	20.6	22.7	18.7	20.7	20.4	19.1	15.2	15.2	13.3	18.9	19.4	15.9	13.1	13.9	19.4	18.7	18.6	15.6	13.3	12.3	15.8	13.6	17.8	17.8	16.9	24.2	38.8	18.1	14.1	14.9	13.1	44	46.1	45.1	47	32.8	34.7	54.4	21.8	57.8	48
chrII	4301608	4305289	C01F1.1	60.8	28.5	63.7	32.5	52.4	45.4	48.2	54.4	51.5	52	36.2	32.5	32	43.1	39.5	127.6	131.4	29.5	52.9	51.1	52	52.4	54.3	55.1	137.8	137.8	49.7	57.9	28.8	93.4	79.2	27.4	29.2	33.8	33.2	67.6	53	75.9	59.7	99.9	92.6	37.7	39.1	64	69.2
chrII	4299659	4301276	C01F1.2	52.6	21.3	47.6	36.4	67.3	58.7	56.6	64.6	60.1	52.9	43.2	43.6	50.1	42.8	55.2	32.3	35.7	49	58.5	59.6	55.3	39.4	43.2	35	30	33	51.4	37.8	44.3	28.2	34	38.4	45.9	47.2	48.3	25	26	20.4	24.3	37.1	28.7	37	54.9	29.2	28
chrII	4295102	4299213	C01F1.3	23.6	19.9	33.8	64.4	3.5	4.1	3.6	5.1	3.5	5.8	63	57.9	59.4	48.3	64.9	2.8	4.3	39.3	4.9	4.3	6.6	3.8	6.1	6.2	3.3	3.6	4.9	5.3	52.4	44	56.3	48.9	65.2	58.1	59	70.1	67.7	80.3	60.9	51	54.6	35.4	29.8	79.3	54.9
chrII	4276215	4279270	C01F1.4	1.5	2.4	1.5	1.8	1.6	1.5	0.7	0.9	0.7	1.6	1.2	1.8	2.2	3.4	2.1	0.2	0.3	1	0.5	0.9	0.8	2.2	2.3	2.4	0.9	0.5	1.1	3.8	2.5	0.8	2.4	2.2	1.7	1.8	2.3	2.2	2.1	2.9	2.9	1.4	1.7	1.2	2.2	3	2.1
chrII	4279790	4281830	C01F1.5	9.5	6.5	7.9	34.4	0.6	0.2	1.2	1.4	0.4	1.7	30.5	39.5	8.9	11.1	12.5	0	0.4	18.9	0.4	2.4	0.5	0.1	0.1	0.3	0.1	0.1	0.2	0.3	22	4.4	9.7	26.6	20.7	21	14.5	13.7	14.1	16	15.6	4.5	8.2	27.4	5.1	11.8	9.3
chrII	4282220	4288212	C01F1.6	24.9	25.6	29.9	11.1	42.9	40.7	37.5	41.3	40.7	40.8	10.6	9.2	10.4	13.4	10.6	28.4	22.1	7.8	36.7	33.1	37.2	15.2	17.8	13.9	26.4	24.2	35.5	23.8	9.4	29.3	34.7	4.8	8.7	10.3	8.7	21	20.2	25.1	29.8	23.8	26.8	21.1	17.2	29.4	25.2
chrI	4850682	4867826	C01F4.2	3.8	4	3.6	4.5	0.9	0.5	0.8	0.6	0.8	0.7	1.9	1.8	2.2	6	4.5	2.2	2.5	3	0.6	1.2	0.4	1.7	1.9	1.6	1.7	2.2	0.6	2.2	2.6	2.1	4.2	3.6	2.5	3.4	3.5	2.3	3.5	2.6	5.6	0.8	2.2	5	4.8	4.2	2.5
chrIV	9096824	9099472	C01F6.1	11.8	5.4	12.5	7.1	40.2	36.9	31.6	38.9	36.1	44.4	11.1	10.9	8.5	7	6.1	83.8	63.9	4	26.4	17.8	28.3	9.1	7.6	7.8	78.5	70.1	22.7	12	9.6	51	34	11.4	7.4	7.6	8.4	25	13.9	19.4	28.6	20	31.9	10.5	8.3	23.4	29.9
chrIV	9099247	9101570	C01F6.2	0.6	0.1	0.1	0.2	3.7	1	4.3	2.3	2	2.4	0.2	0.2	0.1	0.1	0.3	0.4	0.2	0.1	1.4	3.1	1.6	45.8	42.1	39.2	0.5	0.4	1.1	53.8	0.3	0.3	0.2	0.2	0.2	0.2	0.2	0.4	0.1	0.2	0.1	0.1	0.4	0.1	0.2	0.2	0.5
chrIV	9104950	9107594	C01F6.4	2.1	1	2.4	1.8	28	28.3	24.9	31.2	29	31	2.9	2.7	2.2	1.1	1	48.6	39.6	0.6	22.5	14.1	21.5	3.2	5.3	3.6	47.2	41.6	19.5	4.3	1.5	23.1	19.6	2	2.4	1.9	1.2	14.6	8	7.4	11.5	12.3	19.2	1.2	1.6	9.8	12.9
chrIV	9108915	9109736	C01F6.5	31.5	20.6	34.5	38.5	18.7	25.7	17.2	29.5	23.1	31.3	42.1	36.5	32.8	41.5	42.3	527.9	602	43.2	18.9	18.8	18.2	28.7	23.1	22.6	530.2	571.9	20.9	26.5	36	375.5	413.3	52.9	52.1	47.3	41.5	346.6	314.4	337.2	267.2	357.1	370.9	55	36.8	364.1	427.1
chrIV	9119081	9130369	C01F6.6	120.3	67.8	163.1	79.4	47	33.7	42.8	35.2	39	41.1	88.3	92.8	84.1	87.8	85.5	7.7	7.1	59.3	28.2	54.5	33.4	42.5	38.3	36.2	6.6	6.5	31.4	49.1	76.8	37	74.8	70.9	73.2	78.7	89.9	60.1	70.9	85.7	97.8	40	54.3	104.6	103.7	88.2	54.6
chrIV	9094531	9095640	C01F6.8	34.6	33.5	50.3	36.5	67	72.6	57.8	67.3	62.8	75.7	51.1	43	39.8	42.8	41.5	61.3	56.8	39.2	54.9	51.6	53.9	26.6	27.3	24.6	58.8	56	56.2	28.6	41.7	67.6	65.9	43.7	43.2	55.7	51.1	66.2	56	43.9	44.9	79.4	54.4	40.3	60.1	56.4	58.3
chrIV	9095738	9096218	C01F6.9	301.6	223.4	373.8	400.3	1019.9	816.2	885	778.7	795.1	768.5	572.7	382.8	493.6	514.8	574.8	707.9	753.9	407.9	810.2	987.8	738	702.4	664.8	647.6	666.3	659.2	656	853.3	532.9	939.6	615.2	394.4	502.3	620.7	568.9	951.6	1356.8	928.8	619.6	1317.5	900.1	402.7	555.1	721.6	947.9
chrV	15099729	15104787	C01G10.1	0	0	0	0	0.9	0.2	1.2	0.5	0.5	0.5	0	0	0	0	0	0	0.1	0	0.3	1.1	0.5	9.5	10	10.5	0.1	0.1	0.3	15.2	0	0.1	0.2	0.2	0	0	0	0.1	0	0.1	0	0.1	0.1	0.1	0	0.1	0.1
chrV	15079863	15082462	C01G10.10	5.3	4.1	6.3	3.5	7.1	9.6	8.2	9.7	9	9.4	5.7	5	5	4.5	3.8	10	8.4	3.4	6.6	5.9	7	5.1	4.7	4.4	9.3	10.4	6.1	6.3	4.4	11.9	9.6	3.9	3.6	4	5.7	9.3	7	7.5	7.1	11.7	10.6	4.4	4.2	7.9	9.2
chrV	15071506	15080135	C01G10.11	46.4	33.8	53.5	31.7	37.4	46.2	45.9	49.5	44.6	43.9	32.3	29.5	26.2	57.1	39.3	81.2	92	34.8	33.7	37	35	39.2	28.4	33.2	91	84	36.2	44.1	34.9	82.8	108.7	29.2	35.6	31.1	34.7	104.5	98.8	111.7	125.6	85.2	105.3	57.7	54.5	98.6	84.6
chrV	15068672	15069490	C01G10.12	6.9	4.2	9.3	5.8	15.8	12	13.3	12.7	12	15.7	13.1	8.6	8	5.8	6.5	3	3.8	7.2	8.5	8.8	8.8	5.7	7.7	4.7	2.9	2.8	9.4	8.4	4.6	4.4	5.9	2.8	5.3	5.6	9.3	4.4	6.6	7.9	4.2	5	4.6	5.3	5.2	4.9	5.7
chrV	15105358	15105910	C01G10.14	0	0	0	0	16	6.5	28.9	9.7	8.5	12.8	0	0	0	0	0.1	2.1	0	0	9.9	23.9	12	185.6	232.2	220.4	0.6	0	7.2	266.2	0	0	0.2	0	0	0.1	0	0	0.2	0.2	0	0.1	0.1	0	0	0	0
chrV	15086933	15087279	C01G10.15	10.8	47.6	16.2	23.2	8.1	6.9	4.5	13.7	5	7.8	61.7	63.3	139.8	85.3	201.1	0	0	4.1	6.7	9.7	4.6	7.4	7.7	12.4	0	0	1.5	11	106.2	0.5	2.3	57	117.1	220.9	384.6	2.5	2.9	0.6	3.6	0.4	1	55.2	137.3	3	1.3
chrV	15092948	15094321	C01G10.16	4.1	2.7	1	5.1	1.8	0.4	1	2	0.7	1.3	2.9	4.8	5.6	10.6	4.4	0	0	4.9	0.6	1	0.2	3.3	4.1	4.3	0	0	0.6	7.6	6.6	0.6	0.5	25.2	9	7.5	10	1.1	2.2	2.3	0	0.7	0.7	0	5.1	1.5	0.6
chrV	15090739	15091102	C01G10.17	4.3	24.9	13.9	2.2	1.4	4.4	1	5.5	2.5	10.1	4.4	9.1	21.5	8.7	42.6	0	0	0.8	4.4	6.1	0.8	9.3	3	13	0	0	0.3	6.8	77.5	0	0.5	16.6	75	220.5	326.8	0	0	0	1.1	0.3	0	11	17.5	1.9	0
chrV	15088409	15088682	C01G10.18	0	0	2.3	0	0	0	0	0	0	0	0	0	0	0	0	0	0	0	0	0	0	29.4	31.9	11.2	0	0	0	15	0	0	0	0	0	0	0	0	0	0	0	0	0	0	0	0	0
chrV	15097656	15099537	C01G10.2	0	0.2	0	0.1	0	0	0	0	0	0	0.1	0	0.1	0.1	0.1	0	0	0	0	0	0	0	0.1	0	0	0	0	0	0	0	0	0	0	0	0	0	0	0	0	0	0.1	0	0.1	0	0
chrV	15095031	15097435	C01G10.3	0	0	0	0	0	0	0	0.1	0	0	0	0	0	0	0	0	0	0	0	0.1	0	0	0	0.1	0	0	0	0	0.1	0	0.1	0	0	0	0.2	0	0.3	0.2	0	0.1	0.1	0	0.1	0.2	0.1
chrV	15089737	15090004	C01G10.4	88	224.7	377.4	13.4	14.9	20.3	10.6	28.9	18.2	38.1	28.3	25	107	37.1	139.4	0	6.8	0	26.5	37.5	5	9.9	1.5	5.7	0	0	4.9	5.6	418.7	0	4.5	103.4	183.3	621.1	1084.9	0	2.6	0	6.4	1	0.9	96.3	128.2	7	5.1
chrV	15089084	15089482	C01G10.5	26.4	202.3	82.1	9.7	2.4	17.2	5.3	23	3.5	35.6	13.3	17.8	35.3	8.6	35.6	0	0	1.1	7.4	13.5	2.2	7	0	1.8	0	0	1.7	1.6	420.2	1.1	1.3	140.6	234.1	778.3	1346.9	0	0	0	2.8	0.9	0	157.3	133.4	11.2	7.5
chrV	15087638	15088319	C01G10.6	8.2	26.8	72.5	19.1	1.9	2.5	1.5	2.8	1.3	3.1	30.4	21.7	80.6	66.4	151.8	0	0	23.7	3.6	11.4	1.7	2.8	1.2	1.9	0	0	1.2	0.9	68	0.3	0.6	45.8	59.6	93.9	161.8	0	0	0.3	0.6	0.6	0.5	49.7	108.1	0.7	1.4
chrV	15085729	15087047	C01G10.7	8.1	8.1	9.5	9.8	19.5	22	18.8	21	16.9	24.3	11.3	11.4	11.1	8.6	7.4	6.4	8.7	7.4	15.8	13.7	16.7	11.9	13.5	11.1	6.6	7.4	14.7	10.2	11.4	7.9	10.9	16.7	10.1	9.2	11.8	8.8	8.4	7.1	6.5	12.5	5.8	8	7	6.2	6.7
chrV	15084040	15085368	C01G10.8	147.4	69.9	178.9	106.6	127.8	143.7	121.7	162.5	129.7	175.3	143.8	148.3	111.3	127.5	108.6	308.9	290.8	101.7	106.3	87.7	112	133.6	107.7	93.3	300.2	283.1	98.6	112.9	128.1	235.4	250.9	127.5	119.7	126.1	132.5	204.4	172	146.4	147.4	213	187.7	85.4	97.9	169	206.4
chrV	15082746	15084074	C01G10.9	15.6	6.6	11	10.2	7.6	6.7	6	7	9.4	7	20	17.4	14.7	14.5	19.1	13.5	13.8	13.5	5.9	5.6	7.1	3.2	5	3.3	12.3	16.1	4.9	8.1	11.4	23.5	18.8	12.3	15.5	16.2	18.7	15.5	16.2	14.5	15.5	15.2	18.8	12.4	14.5	14	17.2
chrII	14573539	14576487	C01G12.1	11.7	6.2	9.5	17.1	3.4	2.9	2.5	3.6	2.5	3.3	12.9	14.2	7.8	13.2	10.3	1.4	1.3	14.1	2.8	4.1	3.6	2.5	3	2.3	1.7	1.8	2.9	2.5	12.9	10	11.3	15.8	14.1	13	10.2	20.8	23.2	26.1	24.8	12.7	15.2	18.8	9.1	20	15.1
chrII	14580255	14580968	C01G12.10	13.6	17	18.4	1.6	10.7	1.7	7.2	10.8	5.8	13.9	6.8	6.1	15.2	3.5	1.2	1.8	0	5.5	5.3	22.8	5.2	0.3	1.5	0	2	0.6	3.9	0.6	7.6	1.3	0.8	0	8.3	19.3	13.4	1.1	5.8	2.3	6.1	0.9	1.7	0	9.1	2	2.1
chrII	14580817	14581202	C01G12.11	6.9	0.9	3.9	0	5.9	1.5	7.3	5	3.7	7.5	8.5	3.7	12.1	0.9	1	3.6	2.8	2.5	4.2	19.4	3.1	0.5	0.6	0.3	1.4	0.7	2.7	0.4	0	1.7	1.7	0	3.5	21.9	7.2	1.2	1.9	2.8	2.9	1.1	3	0	4.2	1.6	1.9
chrII	14576881	14578000	C01G12.13	0.2	0	0	0	2.1	0.4	1.9	1.2	0.6	0.6	0.4	0	0	0	0	0	0	0	0.4	2.1	1.1	28.4	22.3	22.9	0	0	1.6	15.3	0	0.1	0.1	0	0.2	0	0	0	0.2	0.1	0	0.1	0.1	0	0	0.2	0.1
chrII	14578209	14578522	C01G12.2	33.4	2.3	29.2	5.3	10.7	1.3	8.2	5.5	7.5	9	9.9	3.6	20.3	3.7	1.8	1.4	3.6	3.6	3.4	23.7	3.3	0.5	0.4	0.3	0	0	2.6	1.3	0	1	2	0	5.5	16.5	9.7	0	7.8	5.4	13.2	1.7	2.2	5	10.5	4	4.9
chrII	14581389	14582285	C01G12.3	0	0.1	0	0.2	11.7	6	15.4	9.3	7.2	7.9	0.2	0.4	0.3	0.3	0.1	43.3	54.7	0.1	6.2	11.4	9.3	102.2	120.4	124.8	44.4	50.4	7.1	103.6	0.2	26.1	25.1	0	0.2	0	0.3	17.1	12.3	8.1	9.7	13.9	16.5	0.2	0.1	13.3	21.9
chrII	14586451	14587432	C01G12.5	0	0	0	0	1.6	0.1	0	2.9	0.2	2	0	0	0.1	0.1	0	0	0	0.1	0	0	0	0.5	0.7	0.6	0	0	0	0	0.2	0	0.3	0	5.8	1	0.1	0.9	1.3	0.2	0	0.1	0	23.4	1.7	0.7	0.4
chrII	14587881	14588186	C01G12.6	13.2	3.5	6.1	2.6	14	2.1	9	8.1	5.9	6.4	5.9	2	15.8	3.1	2.2	0	0	9.3	4	29.3	1.8	0	0.9	0.3	0	0	2.8	0.9	10.7	2.6	1.7	0	6	28.7	10	1.3	12.4	7.3	21	0	1.7	0	12.4	0.7	4.9
chrII	14588545	14591818	C01G12.7	3.1	7.9	3.5	1.9	0.2	0.2	0.3	0.5	0.3	0.2	1.9	2.2	1	4.1	3.3	0.1	0	1.6	0.2	0.2	0.2	0.4	0.2	0.3	0	0	0.3	0.5	2.1	0.4	0.9	2.3	2.8	4.3	3.4	0.8	1.2	0.5	1.3	0.3	0.4	5.9	1.5	1	0.3
chrII	14593448	14597565	C01G12.8	0.1	0	0	0.1	10.3	3.3	11.6	7.5	4.7	5.9	0.1	0.1	0.1	0	0	2.4	1	0.1	5.3	13.4	7.3	126.9	121.4	142.7	1.4	1.2	4.7	136.7	0	0.4	0.3	0	0	0.1	0	0.2	0.1	0.1	0.2	0	0.3	0.2	0	0.3	0.2
chrII	14578943	14580023	C01G12.9	0	0	0	0	3.2	0.6	2.6	1.1	0.7	2.4	0.1	0	0	0	0	0.3	0	0	0.9	2.4	0.7	31.2	27.6	26.3	0.2	0.2	1	21.5	0	0.2	0.3	0	0	0.1	0	0	0	0	0.4	0.1	0.1	0	0	0.3	0
chrIV	6526712	6529791	C01G5.2	10.3	4.8	11.3	8.4	51	58.2	55.2	57.3	57.2	61	20.4	21.6	15.6	7.6	7.9	3.2	3.1	6.3	50.8	42.3	46.3	28.3	27.3	38	3.1	3.1	47	31.6	8	4	3.2	8.3	13.9	15.2	12.7	3.9	4.7	3.3	4.5	3.2	3.9	3.8	10.8	3.3	3.6
chrIV	6536167	6538989	C01G5.3	0.8	0.3	1.9	0.2	2.5	1	1.9	1.3	1.4	2	0.5	0.8	0.3	0.5	0.5	1	0.6	0.3	1.1	2	1.1	22.5	20.5	17.5	0.8	0.7	1.4	22.6	0.6	1	1.1	0.9	0.5	0.5	0.5	0.4	0.3	0.7	0.5	0.9	0.6	1	0.2	0.5	0.9
chrIV	6531738	6535666	C01G5.4	0	0	0	0	1.1	0.4	1.6	0.8	0.5	0.8	0	0.1	0	0	0	0.1	0	0	0.5	1.4	0.6	12.7	12.2	14.1	0	0	0.5	16.7	0	0	0	0	0	0	0	0.1	0	0	0	0	0	0	0	0	0
chrIV	6524596	6526485	C01G5.5	1.8	2.2	3.1	3.5	14.2	13.1	11	15.6	12.7	17.4	3.2	5.2	3.8	2.7	2.3	41.2	30.4	1.5	11	10.7	11.8	4.7	4.4	4	39.1	31.1	9.5	5.3	5	17.2	13.7	6.7	3.9	3.2	3.9	11.9	10.4	9.7	8.6	11.4	12.9	3.2	3	7.8	13.1
chrIV	6522862	6524557	C01G5.6	24.1	20.5	36.8	21.2	54.4	53.5	49.8	66.2	57.6	64.7	28.4	26.2	23.9	22.5	20.1	142.5	168.5	12.5	47.9	40.4	48.1	48.9	43.9	43.5	139.9	155.4	41	55.8	21.2	115.9	80.5	23.8	22.1	23.5	24.8	73.3	51.2	64.9	64.2	72.6	100.6	23.3	21.6	66.6	72.6
chrIV	6518162	6519023	C01G5.7	0	5.3	1.2	6.7	0.5	0	0.3	0.3	0	0	2.4	3	3.4	5.7	6.3	1	1.3	1.4	0.2	0.2	0.2	0.4	1.4	0.4	0	0.2	0.4	1.2	4.6	2.6	6.5	1.4	2.9	2.7	3.2	5.9	6.9	8.6	5.4	2.7	3	0.6	2.5	6.1	5.1
chrIV	6548839	6552556	C01G5.8	2.7	1.6	4	2.2	14.6	15.1	13.3	17.3	15.7	16.9	3.5	3.6	3.8	2	1.9	19.4	19.4	1.3	10.6	7.4	10.3	8.2	8.1	8.3	20	19.2	8.6	11.1	2.2	13.4	10.4	2.5	1.7	2.5	2.1	8.8	5.1	8	8.1	12.1	10.4	1.7	2.3	5.9	7.5
chrIV	6519963	6522292	C01G5.9	2.1	0.5	2.5	1.2	0.7	0.5	0.5	0.3	0.4	0.4	1	1.2	0.9	0.5	1.3	0.2	0.4	0.4	0.3	0.4	0.4	0.1	0	0.1	0.1	0.3	0.1	0.3	1.3	4.2	4.3	1.3	1.6	0.8	0.8	5.4	5.9	7.2	7.3	3.3	6.2	1.2	0.8	6.1	4.6
chrII	9258852	9261934	C01G6.1	373.6	620.2	371.1	569.9	110.9	72.6	133.1	68.1	88	68.1	332.7	310.8	454.4	948.1	880.1	186	225.3	471.7	91.5	202.5	80.6	110.8	80.9	82.1	193	237.7	84.3	185.1	736.4	2283.9	2511.8	719.7	647	644.1	739.8	3814.6	3984.8	3523	2870.3	3292.4	3272.5	1299.4	1023.7	4577.9	4380.2
chrII	9267275	9268243	C01G6.2	0	0.3	0	0	1.8	0.7	4.4	2.5	2.2	2	0.2	0.2	0	0.1	0.1	3.1	6	0.3	1.5	4.2	2.9	62.8	62.6	56.7	3.4	3.8	2.5	43.3	0	4.3	4.1	1.2	0.4	0	0	3.8	2.8	0.2	1	2.5	1.8	0	0.1	2.3	4.3
chrII	9269831	9271475	C01G6.3	0.5	0.1	0.3	2.8	49.7	77.6	40.9	83.6	68	91.7	2.3	0.9	1	2	0.3	1422.2	1581.6	0.4	44.3	23.8	45.2	0.6	2.2	1.2	1463	1536	40.8	1.2	2.1	1167.8	736.1	3.6	2.5	1.5	1.4	649.7	440.1	496.5	485.5	927.4	842.5	1.2	1.2	524.1	685.5
chrII	9271201	9272984	C01G6.4	80.6	66.9	81.6	68.3	72.6	63.2	77	65.6	63.6	71.3	49.2	57.1	54.1	54.2	40.4	145.1	137.2	29.7	60.3	80	72.5	61.8	62	58.7	145.2	152.6	70.5	72.9	55.7	117.9	147.6	64.8	38.2	44.9	41.7	133	152.4	114.2	122.8	154.2	120.2	60.1	48.5	137	126.7
chrII	9274848	9280038	C01G6.5	71	47.1	76.4	49.1	66.5	58.9	59.6	62.1	56.2	64.4	44.6	45.4	36.6	56.7	44.7	131.2	109.5	36	48.7	45.2	52.5	28.2	33.5	25.6	133.9	115.2	50.9	36.9	43.7	71.7	85	44	42.9	39.6	42.2	69.5	55.9	74.1	85.1	57.8	75.6	55.6	43.2	59.8	66.7
chrII	9285633	9289076	C01G6.6	97.1	45.8	64.9	117.4	49.9	52.9	65.5	53.5	59.9	59.9	171.5	173.2	92	74.3	86.9	29.5	25.4	76.5	47.9	44.8	75.5	34	36.5	33.6	26.7	25.4	65.7	40	65.7	29.9	36.6	29.4	40	59.7	63	55.9	45.4	33.4	45	31.9	29.4	39	46.4	22.2	23
chrII	9291956	9293981	C01G6.7	65	55	130.8	75	10.3	7.7	9.5	19.1	6.1	17.8	37.9	32.3	44.4	24.6	30	2.6	2.4	31	6.3	7.3	6.3	35.1	5.9	13.1	2.9	2.4	5.2	8.9	31.5	11.7	29.4	29.3	24.5	21.2	13.6	23.7	21.1	36.4	35.1	15.4	17.1	25.2	15.4	34.5	21.5
chrII	9295855	9310242	C01G6.8	14.4	8.1	17.6	18.3	20.5	18.8	15.9	22.6	19.5	23.6	15.1	16	15.1	17.7	14	121.8	114.9	14.9	14.8	10.4	16	7.2	8.3	6.2	119.2	110.6	14.1	12.2	13.6	130.8	113.3	17.8	15.8	13.5	13.6	128	115.3	135.8	137.2	117.9	131.5	20.3	19	128.9	103.9
chrII	9293976	9295693	C01G6.9	0.9	0.5	1.9	1.8	1.2	0.5	1.1	0.6	0.3	1	1.9	1	0.3	0.6	0.6	0.2	0.3	0.5	0.3	0.8	0.4	0.5	0.5	0.5	0.2	0.4	0.2	1	1.5	5.7	11.8	0.6	1.5	0.6	0.5	16.8	23.6	33.7	28.2	8.3	16.1	0	0.1	15	13
chrI	5272848	5274325	C01G8.1	1.7	0.7	1.7	0.8	166.5	211.4	155.7	184.9	182.3	187.6	2.5	2.3	1.4	1.4	0.8	48.3	32	1.2	169.3	114.4	167.7	3.7	9	5	52.2	43	147.8	5.9	1.4	39.2	35.3	0.3	1.1	1.7	1.7	34.4	13.3	11	9	12.5	24.1	0.7	1.2	10.5	14.8
chrI	5274698	5278711	C01G8.2	9.8	7.8	10.1	6.1	7.1	6.6	6.1	7	6.5	7	7.3	7.4	6.6	7.1	5.7	17.2	11.7	3.9	4.7	4.2	4.8	7.5	5.8	4.6	14	13.3	4.6	7.4	8.4	13.5	11.6	5.9	6.1	7.3	7.1	11.3	10.3	11.2	12.5	11	13.1	9.4	6.6	10.3	9.8
chrI	5278806	5281519	C01G8.3	12.8	13.8	17.1	13.5	33.6	34.9	32.4	32.2	34	37.9	19.6	17.9	16.6	12.5	11.1	56.3	50.5	9	28.9	24.5	26	15.5	12.8	11.2	54	46.6	27.3	16.7	14.5	28.6	28.4	16.1	14	11.7	13.6	23.3	16.1	15.5	15.6	24.6	22	13	11.3	17.2	17.2
chrI	5282085	5283944	C01G8.4	6.7	5.5	6.9	5.8	11.8	9.9	9.1	13.1	10.7	11.5	7.4	6.4	3.5	4	4.7	8.9	9.5	3.5	8.7	7.6	11.7	8.3	8.6	9.8	8.6	8.3	9.2	12.1	5.8	8.3	8.2	4.3	5.3	4.9	5.5	8.2	9.2	8.5	8.7	7.5	8.9	7.5	5.9	5.6	5.5
chrI	5284059	5291608	C01G8.5	189.7	102.3	242.7	138.9	131	114.8	125.4	121.7	121.8	116.9	158.5	146.5	147.5	145.8	165.5	118.6	102.5	110.5	96.1	126.6	91.2	75.3	78.4	75	118.1	107.8	88.2	92.4	161	125	132.9	153	151.7	147.3	160.2	137.7	136.7	165.4	159.9	132.3	137	150.6	154.8	152.6	135.7
chrI	5298757	5300334	C01G8.6	16.2	8	17.7	12.5	34.6	33.7	36.7	32.9	31.2	37	33.3	28.5	24.6	9	9	10.9	10.6	8	27.5	28.7	26.9	41.5	34.2	33.6	9.4	9.2	25.4	52.5	13.8	4.9	5.6	12	14.9	18.4	13.7	5	3.6	3.2	4.6	6.6	4.7	2.8	10.1	4	3.1
chrI	5300953	5310917	C01G8.9	53.9	39.2	59.1	50.4	55.2	55.7	56.1	57.2	56.7	56.3	45.1	42.8	45.3	49.8	50.7	117.7	119.4	42.1	48.9	53.8	50.1	44.7	46.3	39.4	119.4	119.2	51.5	56.3	41	159.9	117.8	47.6	42.6	44.6	40.9	161.6	153.5	141.4	147.8	183.9	158.4	81.2	66.1	169.6	178.8
chrI	7202180	7203506	C01H6.1	13	13.5	12.7	8.4	1.3	0.6	1.1	1.3	0.9	1.2	5.1	5	2.8	6.3	1.7	0	0	5.9	0.2	2.8	0.5	0.4	0.3	0.1	0	0	0.8	0	3.1	0.2	0.3	7.3	6.6	4.2	2.6	1.6	2.2	2.4	4.8	0.2	0.8	22.7	8.3	1.7	0.6
chrI	7204542	7207715	C01H6.2	3.6	2.5	4.3	5.2	1.5	1	1.3	0.6	0.9	1.1	5.4	6.3	3.3	3.4	4.4	0.7	0.4	2.6	0.5	1.1	0.8	1.2	1.5	1.5	0.3	0.5	0.8	3	4.9	2.3	3.4	3.8	3.6	4.7	4	4.6	5	7.7	7	3.7	3.9	3.6	2.9	4.4	3.2
chrI	7208024	7209864	C01H6.3	2.2	2	2.1	1.7	0.6	0.2	0.4	0.6	0.4	0.1	0.8	1	1	1.5	1.2	0.5	0	0.5	0.1	0.2	0.2	0.2	0.8	0.3	0.3	0.2	0.1	0.9	1.2	1	2.3	2.5	0.9	0.8	2.1	1.4	1.6	1.6	1.4	0.8	0.9	3.4	1.7	2.6	2
chrI	7210540	7212697	C01H6.4	3.7	1.9	4.9	2.4	3.2	2.2	2	2.1	2	2.2	4.1	5.3	4	2.9	3.4	0	0	1.9	2	1.4	2.2	0.9	3.1	3.9	0.2	0	1.8	5.1	2.6	0.4	1.9	3.7	4.1	4.9	4.4	2.5	2.8	3.4	2.4	0.9	1.6	3.7	3.5	2.5	1.6
chrI	7214742	7221804	C01H6.5	15.8	14.2	32.1	32.6	25.8	25.1	24.8	25.5	26	26	31.1	27.5	45.6	31	45.7	24.6	18.4	17	19.1	21.1	17.9	38.9	33.6	35.4	23.2	22.3	17.8	47.6	29.5	32.2	32.5	30.1	29.6	28.8	29.2	37.4	28.8	35.2	36.9	42.5	43.4	32.9	30.7	39.7	35.1
chrI	7222048	7224133	C01H6.6	2.4	1.4	3.5	3	4	3.1	3.9	3.6	2.7	3.9	2.1	2.4	1.4	1.8	2	2.4	1	0.8	2.7	3	3.2	11.1	10.9	11.2	1.9	1.2	3	17.8	3.1	1.1	2	1.6	2	2.6	2	1.6	1.5	2.8	1.8	2.1	2.1	3.5	1.5	1.6	1.4
chrI	7224653	7227763	C01H6.7	20.4	11.2	24.6	14.2	36.3	36.7	33.2	42.9	35.5	43.6	17.3	13.8	14	15.9	14.7	146.8	156.5	9.2	28.3	26.2	30.1	10.6	11.1	8.1	140.5	150.4	27.2	13	13.6	117.2	88.6	15.5	15.8	14.1	14.1	78.3	56.4	83.9	73.8	115.6	96.6	20.5	15.3	73.8	88.8
chrI	7227861	7229433	C01H6.8	27.1	10.3	25.6	21	5.2	2.4	2.8	3.8	3.9	4.9	19.9	18.8	10.4	11.3	14.2	0.7	0.8	9.1	2.9	2.7	3.6	2.6	4	2.7	0.5	0.7	2.5	5.3	20.9	6.1	11.8	24.6	15.4	13.4	12.9	15.1	20.6	28.1	16.1	9.3	9.7	16.6	10.2	14.4	12.7
chrI	7229415	7233118	C01H6.9	2.6	1.6	4.2	2.2	10	9.2	8.9	10.9	9.7	12.2	4.5	4.4	3.3	2.5	1.7	40.5	38.3	2.6	7.7	6.6	7.4	7.2	7.9	7.4	38.2	37.7	6.5	9.1	2.4	29.9	17.2	2.7	3	2.4	1.8	17.9	10.3	16.9	15.7	24.8	23.7	3.4	2.4	13.5	18
chrV	3467449	3468498	C02A12.1	1.8	1.4	1.3	2.6	0.8	0.8	1.2	0.5	0.7	0.4	2	1.5	1.7	1.7	2	0	0	2.1	0.3	0.7	0.9	2.4	2	3	0	0	0.4	3.4	1.6	0.2	1.4	2.2	2.1	2.8	2.7	0.3	0.8	0.7	1.2	0.2	0.7	4.5	3.3	2.6	0.9
chrV	3483087	3484778	C02A12.10	0.2	0.2	0.2	0.5	0.1	0.1	0	0.1	0	0	0.1	0.1	0.1	0.6	0	0	0	0	0	0.1	0	0.2	0	0	0	0	0	0.1	0.2	0	0.1	0.4	0	0.3	0.2	0	0	0.1	0	0	0	0.2	0.2	0.1	0.4
chrV	3469441	3470879	C02A12.2	0	0	0	0	0	0	0	0	0	0.1	0	0	0	0	0	0	0	0	0	0	0	0	0	0	0	0	0	0	0	0	0	1.2	0	0	0	0	0	0	0	0	0	0	0	0	0
chrV	3478027	3480443	C02A12.3	0.2	0	0	0	0	0	0	0.1	0	0	0	0	0	0	0	0	0	0	0	0	0	0	0	0	0	0	0	0	0.2	0	0.1	0	0	0	0	0	0	0	0	0	0	0	0	0	0.2
chrV	3481415	3482599	C02A12.4	107.4	79.1	46.5	131.6	220.5	191.4	126.5	201.4	166.3	242.2	64.4	63.6	51.6	139.6	152.6	0.6	0.8	134.4	56.5	88.3	62.7	73.8	211.3	222.9	0.2	0.1	59.1	217.9	290.8	0.8	4.6	204.4	269	649.4	739.1	0.3	1.4	1.6	3.6	0.2	2	318.2	112.5	5	1.6
chrV	3485545	3486954	C02A12.5	0	0	0	0	0	0.1	0	0	0	0	0	0	0	0	0	0	0	0	0	0	0	0	0	0	0	0	0	0.1	0	0.1	0	0	0.1	0	0	0	0	0	0	0	0.1	0	0	0	0
chrV	3489224	3490532	C02A12.6	0	0	0	0	0.1	0	0	0.1	0	0	0.2	0	0	0	0	0	0	0	0	0	0	0.1	0	0	0	0	0	0	0	0	0	0	0	0	0	0	0	0	0	0	0	0	0.2	0	0
chrV	3471866	3475118	C02A12.8	0	0	0	0	0	0	0	0	0	0	0	0	0	0	0	0	0	0	0	0	0	0	0	0	0	0	0	0	0	0	0.1	0	0	0	0	0	0.1	0	0	0	0	0	0	0	0.1
chrV	3476401	3477593	C02A12.9	0	0	0	0	0	0	0.1	0	0	0	0	0	0	0	0	0	0	0	0	0	0	0	0.2	0	0	0	0	0	0	0	0	0	0	0	0	0	0	0	0	0	0	0	0	0	0
chrIV	5086324	5088870	C02B10.1	43.7	28.3	65.9	39.4	78.4	93.4	92.3	74.7	78.5	79.9	71.9	74.8	92	45.9	63.3	34.9	22	47.7	85.7	100.3	97.4	131.7	114.2	118.5	33.2	26.5	85.1	144	43.4	19.2	17.4	49.3	46.8	48.1	52.5	14.1	10.9	9.5	11.8	17.9	14.3	28.7	63.2	12.7	13.5
chrIV	5090281	5091101	C02B10.2	16.4	9.5	17.7	10.7	84	83.1	83.3	88.6	87.5	83.3	19	16.3	18.5	17.3	18.3	167.4	135	10.9	74	64.6	72.7	22.8	24	20.5	154.1	142.2	54.8	29.2	18.3	88.5	63.1	16.5	15.7	17.3	20.7	80.2	83.2	72.4	62	96.8	77.7	18.6	17.5	55	78.4
chrIV	5092799	5103273	C02B10.3	78.8	63.4	109.5	75.1	14.6	10.6	16.4	10.7	9.7	13.9	56.2	46.9	44.3	91	66.4	8	6.1	49.3	11.2	17.8	14.7	22	32.7	25.8	6.9	8.3	9.5	26.9	71.7	74.7	102.6	46.6	62.7	63.1	70.4	147.8	147.1	146.6	146.6	99.5	113.9	75.8	78.9	186.9	133.7
chrIV	5091575	5092800	C02B10.4	57.1	33.1	72.5	57.2	165.7	160.8	138.7	157.7	148.1	163.2	55.4	58	53.9	53.4	64.9	661.1	682.7	65.6	136.3	125.6	135.4	61.5	66	57.5	684.7	682.6	118.9	74.8	63.8	486.3	290.5	56.2	66.7	68.6	68.5	283.1	225.2	213.8	227.8	537.5	318.9	62.5	78.4	248.3	270.9
chrIV	5083294	5086879	C02B10.5	19.8	17	24.8	18.3	48.3	49	44.6	47.9	48.5	45.4	23.7	24.2	30.1	26.7	27.7	73	85.7	16.9	46.3	49.3	42.9	34.1	38.9	24.2	77.8	79.8	43	42	19.8	100.8	77.3	20.5	17.8	19.2	18	72.1	59.2	69	65	107.6	82.6	34.1	35.1	79.5	84
chrIV	5070922	5072221	C02B10.6	0.1	0	0	0	5.2	2.1	7.6	3.5	2.7	3.6	0	0	0	0	0	0.3	0.3	0	4.2	8.5	4.4	168.7	124.4	140.7	0.4	0.1	3	121.1	0.1	0	0	0	0	0.1	0	0.1	0.1	0.1	0	0	0	0.1	0	0.1	0.1
chrX	12678759	12689207	C02B4.1	43.8	14.7	27.7	16.6	1.5	0.4	2.5	2	0.7	2.1	9.5	10.3	2.7	4.5	1.4	0.4	0.1	15.2	0.7	3.2	0.6	0.2	0.4	0.2	0.2	0.1	0.8	0.4	9.4	6.2	39.8	13.8	15.3	11.2	4	8	12.3	12	12.9	3	15.6	84.3	21.5	38.9	26.6
chrX	12663723	12667782	C02B4.2	15.5	23.9	12.6	18.3	10	7.9	6	9.2	8.4	9.1	12.1	10.6	7.3	27.8	14.8	16	13.5	8.3	7.9	7	9.9	4	21.4	1.9	14.6	15.5	8.4	4.2	19.8	25.4	91.2	19.5	32.3	31.8	46.2	18.6	21.2	22.2	24	18.4	35.6	31.6	14.8	54.7	48.2
chrX	12658404	12660991	C02B4.3	0	0	0	0	0	0	0.2	0	0	0	0	0	0	0	0	0	0	0	0	0	0	0	0	0	0	0	0	0	0	0	0	0	0	0	0	0	0	0	0	0	0	0	0	0	0
chrX	12662402	12663553	C02B4.4	9.2	5.5	0.3	18	2	2.1	2.5	1	1.7	2.4	14.4	11.2	8.5	19.4	11.5	3.9	7.4	9.7	2.4	4.4	3	9.8	11.4	6.3	7.3	3.6	4.3	7.8	29.5	21.2	63.3	29.5	19.1	12.4	14.3	15.2	35.1	30.7	28.8	9.2	32.1	39.3	26.3	81.2	101.3
chrX	8147660	8148539	C02B8.1	0	0.3	0.4	0.6	1.1	2.7	2.5	3.4	1.7	1.7	0.8	1.7	0.3	0.2	0.4	0.7	2.5	0.6	1.9	2.2	1.4	0.5	0.6	1.4	0.5	0.8	1.2	0.7	0	1	1.9	0	1.9	0.6	0.4	1.9	2.7	0.9	2.2	3	1.2	0	0.7	1.4	2.3
chrX	8144383	8144978	C02B8.2	0.7	0	0	0	0	0	0	0	0	0.4	0	0	0	0	0	3	4.1	0	0	0	0.1	0	0	0	4.1	4.4	0	0	0	1.5	1.9	0	0	0	0	1.6	0.6	0.3	1.3	1	0.9	0	0	0.6	0.6
chrX	8139472	8140184	C02B8.3	10.9	10.5	10.1	20.6	4.9	3.4	5.6	2.7	2.1	3.8	15.5	10	14.9	27.4	14.6	1.8	1.1	11.8	3.5	5.3	2.1	28.3	18	19.8	1.6	1.3	4.3	36.6	21.6	2.3	4.5	16.9	14.3	15.2	17.6	0.8	2.5	2.3	4.6	1.2	2.2	31.9	19.7	3.6	4.3
chrX	8116586	8120057	C02B8.4	10	8.1	18.7	5.1	3.2	2.9	2.9	1.4	1.4	1.8	7.9	6.2	8	9.2	9.1	0.6	0	4.6	2.1	4.6	2.4	5.2	6.1	4.6	0.3	0.1	4	6.2	4.6	8.8	8.4	1.7	3.5	5.6	5.8	10.2	16.4	17.6	15	13.7	12.1	10.4	7.1	14	14.9
chrX	8120360	8125707	C02B8.5	0.8	1.2	1.1	0.7	0.3	0.4	0.3	0.3	0.3	0.3	0.6	0.8	1	0.9	0.7	0	0	0.7	0.2	0.2	0.3	0.9	0.7	0.5	0	0	0.2	1.1	0.7	0.1	0.4	0.9	0.7	1.2	1.2	0	0.3	0.3	0	0.1	0.1	0.2	1	0.3	0.3
chrX	8133099	8136279	C02B8.6	4.4	3.7	8.4	3.4	3.4	3.4	3.5	3.6	2.7	4.5	4	3.1	3.4	2.9	2.7	12.2	15.7	2.9	3	2.9	3.4	2.8	2.2	1.9	14	14.8	3.5	3.1	4.5	18.1	14.7	5.4	3.8	4.3	5.7	13.6	15.2	15.8	14.7	20.7	15.1	5.6	5.3	18.2	16.4
chrX	8137671	8137830	C02B8.7	0	0	0	0	0	0	0	0	0	0	0	0	0	0	0	0	0	0	0	0	0	0	0	0	0	0	0	0	0	0	0	0	0	0	0	0	0	0	0	0	0	0	0	0	0
chrIII	7873714	7877041	C02C2.1	27.7	48.8	57.9	19.7	9.7	6.2	20.3	8.1	7.2	8.3	20.4	18.8	48.9	35.7	33.9	0.2	0.4	9	7.7	11.4	7.9	34.3	18.5	19.3	0.3	0.3	8.9	13.1	35.2	0.8	7	17	18.3	21.3	25.6	0.7	2.4	2.4	4.3	0.3	0.7	28.2	23.8	4.3	3.6
chrIII	7866442	7868661	C02C2.3	7.2	2.5	8.5	7.3	3.2	2.9	3.1	3.2	3	3.9	10.5	10.6	6.8	8.6	6.4	0.2	0	3.8	2.5	3.9	2.7	6.5	5.4	4.5	0.3	0.1	3.4	9.5	8	3.1	3.5	8.8	6.7	7.8	8	5.1	7.5	12.7	12.1	2.5	7	4.3	4.2	7.2	5.8
chrIII	7862512	7865222	C02C2.4	3.9	2	5.6	1.1	1	0.8	1	1	0.8	1.3	3	2.5	4.1	2.2	1.7	0.1	0	0.9	0.7	0.9	0.9	0.1	0.7	1	0.1	0.1	1.1	1.7	1.3	0.2	0.4	1.4	2	1.2	1.5	0.1	0.2	0.2	0.2	0	0	1.6	2.8	0.4	0.3
chrIII	7877146	7878774	C02C2.5	2.5	1.3	2.8	1.3	1.4	0.4	1	1.2	1	1	0.9	1.2	2	2.8	2.4	0.5	0	1.4	0.7	1.5	1	2.1	0.6	0.7	0.1	0.1	0.6	1.4	1.2	2	4.8	2.6	1.8	1.3	2	3.9	5.1	5.7	9.3	1.2	4	2.7	5	5.6	5.7
chrX	15568847	15573627	C02C6.1	38.7	31.6	39.8	39.8	28.6	30.1	29.6	27.3	24.7	26	37.2	37.7	40.2	44.1	41.9	17.8	17.6	36.1	24.7	22.8	27.7	29.1	24.6	24.7	18.1	17.3	26.5	34	65.7	61.9	61.2	63.2	60	37.7	41.1	56	65.7	61.5	80.6	43.7	87.1	62.1	91.8	77	66
chrX	15537593	15546646	C02C6.2	12.8	10	12.7	15.9	2.3	1.9	2.6	2.7	1.9	2.5	8.7	8.7	7.8	24.3	14.1	5.4	8	10.5	1.9	2.5	2	2.9	3.1	3.2	4.2	5.9	2.6	4.2	17.3	17.9	18.2	16.1	15.3	11.6	13.8	16.2	18.4	20.7	25.7	21.9	21.3	17.5	17.4	22.4	20.5
chrX	15546638	15552165	C02C6.3	70.6	32.5	78.9	35.3	18.7	14.7	17.8	16	15.1	18.2	49.2	46.5	41	51.9	44.1	5.6	7.3	33.1	13	16.1	15.4	21.5	19.5	17.2	6	5.9	15.1	27.5	59.6	41.1	55	58.2	69	46.1	58.3	55.4	65.7	93.9	85.5	43.8	84.9	47.8	72.5	65.8	49.7
chrX	15284137	15286158	C02D4.1	14.2	6	11.1	2	0.4	0.3	1	1.2	0.4	0.4	2.9	2.1	3.1	2.6	0.7	0	0	3.7	0.3	1.4	0.2	0.4	0.1	0	0.2	0	0.2	0	2.4	2.9	6.3	5.2	6.8	5.7	2.1	2.8	7.3	5.1	10.7	0.6	4.9	13.2	9.1	5.8	4.1
chrX	15286509	15302894	C02D4.2	2.6	2.2	2.7	2.9	0.1	0.7	0.4	0.5	0.4	0.5	2.7	2.4	2	3	3.3	0	0	2.3	0.6	1.3	0.4	0.8	1.1	1.6	0	0	0.3	1.7	3.2	1.5	2.1	5.3	5.1	3	2	2.9	6.8	3.3	4.4	1	3.6	4	8.4	3.4	3.6
chrIII	8561104	8562892	C02D5.1	20	10.1	14	17.7	1.5	0.3	2.2	2.6	0.4	2.2	14.1	15.8	1.4	4.8	1.3	0	0.3	10.2	0.4	2.1	0.6	0.7	0.9	0.5	0	0	0.3	0.2	7.6	4.3	10.9	9.4	7.3	6.5	3.2	11.1	17.9	18.9	25.6	2.6	6.8	18	5.4	12.7	5.9
chrIII	8557254	8559114	C02D5.2	24.1	6.3	19.9	14.2	2.8	2.3	2.6	2.6	2.4	2.1	18.1	19.1	15.6	15.5	13.4	3.7	4.7	10.6	2.6	4.5	2.4	3.4	1.6	2.6	3.1	3.2	1.4	3.7	15.8	19.3	19	15.6	11.8	12.7	13.7	28.2	26.6	39	37.4	23.5	25.3	15.6	7.5	25.5	21.3
chrIII	8554691	8555741	C02D5.3	0.5	1.2	0.7	0.6	0.4	0.1	0.1	0.3	0.1	0.1	0.5	0	0.2	0.3	0.8	0	0.7	0.5	0.1	0.2	0.1	1.6	2.3	1.6	0.2	0.3	0	0.9	0.5	0	0.2	0.8	0.3	0.2	1.3	0	0.1	0.2	0	0.1	0	0	0.4	0.1	0.3
chrIII	8552472	8553757	C02D5.4	35.4	53.2	39.7	62.6	37.8	28.1	37.2	36.9	26.5	46.6	63.3	61.3	54.9	51.9	51.9	47.6	40.6	41.5	24.4	24.6	24.7	165.3	50.6	43.3	48.5	40.8	25	70	71.9	45.2	58.5	61.2	62.8	73.2	66.1	37.5	28.3	47	47.3	39.8	47.5	60.9	42.5	49.9	49.7
chrV	1042692	1048583	C02E11.1	96.9	45.8	100.8	90.1	46.6	45.5	40.5	42.4	42.9	45.2	94.5	97.9	92.9	77.9	95.9	128.4	128.9	77.9	48.2	47.1	49	44.3	48.5	44.8	129.3	129.8	46.8	52.1	99.6	131.2	84.1	73.8	89.6	84.2	80.9	110.5	86.1	91.1	89.3	121	107.1	83.5	78.2	91.1	103.6
chrV	4934723	4939071	C02E7.1	0.4	0	0.1	0.1	0.1	0.1	0.2	0	0	0	0	0	0	0.2	0.2	0.1	0	0	0	0	0	0.1	0.1	0.2	0	0	0	0.2	0.4	0	0	0.6	0.6	39.5	22.1	0	0	0	0	0	0	0.4	0	0	0
chrV	4930802	4933013	C02E7.10	1.3	0	0.7	0.4	0.3	0.2	0	0	0	0	0	0.2	0	0.1	0.2	0	0	0.1	0	0	0	0	0.1	0.1	0	0	0	0.4	1.3	0	0	0.7	0.7	67.5	46.9	0	0	0	0	0	0	0	0	0.1	0.1
chrV	4943101	4944305	C02E7.13	0	0	0.1	0	0	0	0	0	0	0.1	0	0	0.2	0	0	0	0	0	0	0	0	0	0	0	0	0	0	0.1	0	0	0.3	0	0.1	0	0	0.1	0	0	0	0.1	0	0	0.1	0	0.1
chrV	4926656	4928181	C02E7.2	0.5	1.5	0.3	0	0	0	0.1	0.1	0	0	0.2	0.1	0.2	0.6	0.1	0	0	0.1	0	0	0	0	0	0	0	0	0.1	0	0.1	0.1	0.1	0.3	0	0.4	0	0	0.2	0	0.2	0	0.1	0.6	0.2	0.3	0
chrV	4924903	4926210	C02E7.3	0	0	0.1	0.1	0.1	0	0	0	0	0	0.2	0.2	0	0.1	0	0	0	0	0	0	0	0	0	0	0	0	0	0	0	0.1	0.6	0	0.1	0.1	0.2	0.1	0.1	0	0.3	0	0.1	0	0.1	0.3	0.2
chrV	4923277	4924580	C02E7.4	0	0.1	0	0.2	0	0	0	0	0	0	0.1	0	0.2	0.1	0.2	0	0	0	0	0	0	0	0	0	0	0	0	0	0	0.2	0.7	0.4	0	0.3	0	0.3	0.5	0.4	0.3	0.1	0.1	0.2	0.4	1.7	0.3
chrV	4921087	4922602	C02E7.5	0	0	0.1	0.2	0	0	0	0	0	0	0.3	0.1	0	0.1	0	0	0	0	0	0	0	0.1	0	0	0	0	0	0	0.1	0.2	0.5	0	0.2	0	0	0.3	0.1	0.4	0.4	0.1	0.6	0.4	0.3	1.6	1
chrV	4919192	4919567	C02E7.6	2487.1	748.7	1214.4	3334.5	295.4	86.4	435.2	546.5	153.2	402.5	3286.5	3728	798.4	845.2	492.9	6.9	0	3236.9	137	1007.4	112.9	9.7	35.8	12.6	3.4	1.3	106.3	10.6	2523.8	1470.4	1979.5	3079.1	3958.5	5968.2	2335.1	3755.5	8627.2	3587.7	5006.3	894.2	3199.6	9483.6	4149.8	5993.4	4712.3
chrV	4918139	4918571	C02E7.7	2009.7	485.9	1771.1	917	312.6	83.5	436.7	489.6	147.7	394.4	1151	1031.1	396.2	496.2	193.4	4	0	1127.8	80.6	518.1	72.3	21.1	25.9	2	0	0	88.9	7	953.8	759.6	1499.2	1468.5	1832.1	2932.6	1495.4	958.3	4794.1	1669.2	2998.2	153.4	1414.2	3714.3	1847.9	3064.1	2089.2
chrV	4920327	4920776	C02E7.8	0	0	0	0	0	0	0	0	0	0	0	0	0	0	0	0	0	0	0	0	0	0	0	0	0	0	0	0	0	0	0	0	0	0	0	0	0	0	0	0	0	0	0	0	0
chrV	4928263	4929928	C02E7.9	0	0	0	0	0	0	0	0	0.1	0	0	0	0	0	0	0	0	0	0	0	0	0	0	0	0	0	0	0	0	0	0	0	0	0.2	0	0	0	0	0	0	0	0	0	0.1	0.2
chrX	3681154	3684219	C02F12.1	1.2	1.4	1.1	2	0.1	0.1	0.1	0	0.1	0.2	1.1	0.7	1	1.9	1.2	0.8	1.1	0.8	0	0.1	0.1	0.2	0.2	0.3	1.3	0.8	0	0.6	2.6	12.1	14.4	2.7	3	1.5	2.9	20.5	23.5	36.6	25.3	10.4	19.1	4.6	2.2	18.9	13.4
chrX	3672263	3673905	C02F12.10	1.2	1.8	1	0.9	0.9	1.4	0.9	1	1	1.1	0.8	0.7	0.5	0.9	0.8	0	0	0.2	1.1	0.7	0.9	2.1	0.6	0.6	0.3	0.3	1.3	1.1	1	0.7	0.9	1	0	1.1	1.6	0.9	1.7	0.9	0.4	0.5	1.1	0.6	0.2	1.1	2.3
chrX	3668086	3668929	C02F12.3	64.7	53.5	72.9	113	23	14.2	23.6	16	13.2	15.1	79.9	68.8	70.4	239.8	119.5	0	0	68.8	14	24.4	12.9	67	50.7	51	0.4	0.1	12	79.4	166.5	4.9	16.9	165	106.6	107.8	126.2	5.9	19.9	22.9	27.4	2.2	11.1	258.4	133.2	26.3	21.4
chrX	3674029	3678546	C02F12.4	7.8	11.7	7.8	8	6.9	8.9	6.3	8.4	7	9.4	5.3	4.5	5.3	10.3	5.6	53.7	53.3	3.7	5.4	5.2	6.8	7.5	7.7	6.3	57.4	52.4	6.3	7.4	7.6	55.7	38	15.8	6.2	6	7.6	35.2	27.2	41.2	36.8	57	47.8	7.8	6.1	31.7	34.9
chrX	3670359	3672045	C02F12.5	7.2	7.9	15.7	1.5	5.4	3.8	5.1	5.8	6.1	6.9	2	1.9	6.7	5	2.1	0	0	1.4	6	6.8	4.7	2.4	4.3	2.3	0	0	3.8	2.6	1.1	0.2	0.8	6.5	2.9	5.1	3.7	0.6	1.1	0.8	3.5	0.3	0.2	1.6	3.7	0.4	0.9
chrX	3684210	3689194	C02F12.7	44.9	18.3	45.5	33.9	4.7	2.3	4.2	3.9	2.7	3.4	21.6	22.7	15.1	33.9	28	2.3	2.2	30.8	2.9	5	2.9	10.3	10.2	8.3	2.4	2.2	2.9	13.6	28.8	30.3	76.1	34.7	31.5	31.4	29.1	63.5	68.3	97.4	94.9	50	59.2	51.8	29.7	89.6	64.2
chrX	3690153	3693225	C02F12.8	1.6	2	2.6	1.9	6.4	7.6	8.5	8.6	7.4	9.5	1.9	1.7	1.4	2.5	2.4	20.2	13.5	1.5	5.4	4.2	4.6	3.5	4.3	2.9	21.6	18	4.7	5.6	2.3	14.1	8.9	2.2	2.4	1.8	2.1	10.1	8.6	10.8	8.8	11.3	11.3	2.1	2.2	8.4	10.2
chrX	3696889	3700794	C02F12.9	0.6	1.1	0.4	0.7	0.3	0.1	0.2	0.3	0	0	0.7	0.4	0.3	0.7	0.7	0	0	0.5	0.2	0.2	0.2	0	0.3	0.2	0.1	0	0	0.5	0.2	0.2	0.3	0	0.3	0.7	0.8	0.4	0.7	0.7	0.4	0.4	0.8	2	1	0.5	0.2
chrIV	10484089	10492932	C02F4.1	9.1	6.6	10.1	5.6	16.8	16.9	15.7	17.9	16.6	19.5	6.9	7.8	6.7	6.1	5.8	18.2	17.5	3.6	13.2	9.9	13.7	9.9	8.9	8.5	20.6	18.7	11.7	13.5	6.5	19.4	14.8	4.9	6.1	6.1	6.3	11.8	8.7	14.4	13.6	14.5	17.2	8.3	7.7	13.3	14.1
chrIV	10492865	10501579	C02F4.2	137.2	72	166.6	62.2	29.7	21.8	30.9	28	21.5	27.9	68.3	73.8	63.6	99.6	68.4	5	4.9	65.5	22.7	26.3	24.8	52.8	52.2	41.1	5.1	4.7	25	54.9	71.4	29	45.1	75.7	59.3	47.7	51.3	75.2	87.2	93.1	120.5	43.6	51.7	95.3	74.5	84.8	67.4
chrIV	10513869	10515263	C02F4.4	20.3	11.4	13.3	100.7	1.9	0.6	1.9	2.3	0.4	2.5	66.6	62.4	9.8	24.5	20.7	0.3	0.4	48.6	0.7	5.3	0.7	0.5	1.3	1	0.1	0	0.4	1.2	55.2	5.9	12.5	60.2	46.7	44.3	27.7	17.7	24.1	29.7	28.6	3.7	13.2	69.7	16.5	24.5	17.9
chrIV	10523414	10524125	C02F4.5	0	0	0	0	0	0	0	0	0	0	0	0	0	0	0	0	0	0	0	0	0	0	0	0	0	0	0	0	0	0	0	0	0	0	0	0	0	0	0	0	0	0	0	0	0
chrIII	8250564	8254251	C02F5.1	11.6	5.2	10.5	9.9	38.9	38.8	36.3	40	37.9	41.7	18	16.8	13.1	8.8	8.3	132.7	130.9	9.2	30.4	24.7	30.4	32	30	29	134.5	131.8	28.7	38.7	8.9	100.9	66.5	11.5	12.2	10.5	9	62.1	38.9	56.8	50.4	100.4	79.8	22.2	10.4	49	70.2
chrIII	8248613	8249410	C02F5.10	2.1	0.9	1.6	0.9	6.7	5.5	8.1	6.9	4.2	5.2	0.9	0	0.5	0.7	0.3	3.5	3.5	0	6.3	9.7	7.5	46.9	75.6	80.3	2.4	2.8	3.1	48.4	0.4	3.5	2.8	0	1	0.2	0.5	3.5	3.1	2.3	1.3	2.1	2.5	0	1	1.8	2.2
chrIII	8236845	8237822	C02F5.11	4.4	6.6	3	2.2	0.9	0.4	1.1	1.7	0.9	1.2	0.4	1	0.5	2.4	0.8	0.3	0.4	0.2	0.6	0.4	0.6	0.5	1.3	3.4	0.3	0.2	0.6	1.8	7.4	2.1	2.2	2.5	1.5	1.2	1.2	1.2	0.9	1.5	0.8	0.9	1.1	1.6	1.2	2.7	1
chrIII	8240806	8242932	C02F5.12	7.5	8.2	9.9	7.3	5.1	5	3.7	5.7	3.7	5.6	7.6	6	5.3	8.7	6.7	21.3	19.2	4.7	3	2.2	4.1	5.8	4.2	3.1	20	19.4	3.1	4.1	12.6	21.4	27.4	7.7	9	5.6	10	25	23.7	28	19.9	31.8	25.7	8.1	5.6	20.3	18.5
chrIII	8247276	8248745	C02F5.13	5.2	3.9	7.1	4.3	15.4	18.8	13.5	18.4	14.5	18.1	6.3	6.2	4.7	3.4	3	39.4	39.9	3.5	14	9.5	12.1	5.3	5.3	4.2	40.6	36.9	10.9	8.4	3.6	29.2	19	7.4	4.7	5	4.9	26.1	18	15.6	10.7	13.3	20.2	4.6	4.3	14	17.6
chrIII	8234451	8235458	C02F5.14	38.2	23.4	43.8	87.2	12.8	3.9	8.9	6.8	4.5	9.5	96.7	84.6	18.6	32.5	27.5	0	0	9.6	4	4.5	4.8	8.8	7.5	8.4	0.2	0.5	2.9	10.7	66.3	1	4	66.6	52.8	40.7	34.3	8.4	8.8	18.2	10.3	2.2	3	65	18.4	4.1	3
chrIII	8249565	8250122	C02F5.2	0	0	0	0	5.1	2.5	5.7	4.1	2.9	4	0	0	0.4	0	0.1	0	0	0	3.6	6.8	5.3	60.6	51	63.5	0.2	0.2	4.5	59.1	0	0.5	0	1.4	0	0.7	0.3	0.4	0.5	1.4	1.1	0.7	1.3	0	0	0.2	0.9
chrIII	8245817	8247188	C02F5.3	55.9	51.8	73	40.2	45.7	41.8	43.1	48.4	39.9	53.9	53.3	53.5	43	49.1	38	89.2	96.2	29.9	30.7	26.2	29.3	34.2	25.3	22.1	92.4	94.4	26	37.8	48.9	81.3	72.6	52	55.9	53.6	49.4	74.4	50.1	67.4	58.3	68.2	75.8	39.2	50.7	60.9	58.6
chrIII	8244371	8245723	C02F5.4	9.2	7.6	12	8.6	33.5	35.9	29.1	36.3	36.6	42.1	10.8	9.4	6.6	8.3	8.4	55.8	54.9	6.3	29.6	22.7	33.4	11.7	12.2	10.7	55.6	56.6	28.1	13.8	8.2	53.2	42.2	11.1	9.3	12.8	12.6	31.3	29.6	35	30.6	68.7	46.8	10.6	9.1	32.4	39.2
chrIII	8236074	8236835	C02F5.5	0	0.3	0.3	0.2	11.9	4	14.5	9.1	4.3	7	0.4	0.2	0	0.1	0	0.5	0	0	4.4	8.4	6.3	127.4	114.1	117.6	0.8	0.3	5.2	165.2	0	0.1	0	0	0	0.2	0.2	0.4	0	0.3	0.3	0	0.5	0	0.1	0.3	0.6
chrIII	8232577	8234463	C02F5.6	3.6	3.5	6.5	4.1	15.5	13.1	12	15.3	13.7	18.9	7.3	7.6	5.2	4.6	3.9	48	37.6	2.4	12.2	9.5	12.2	19.9	20.8	18.3	44.4	40.1	11.4	26.9	5.6	20	18.7	4.2	5.2	4.7	5.7	14.3	10	11.3	12.3	14.7	14.7	4.5	3.5	8.8	13.8
chrIII	8229653	8233595	C02F5.7	21.8	54	30.6	38.6	9.5	6.5	12	14.1	8.4	13.3	34.7	37.8	34.4	33.4	21.3	3.9	3.7	12.9	6	11	7.8	45.2	30.9	26.5	3.7	4	6.3	47.8	40.4	12.5	14.5	41.6	24.9	24.2	24.9	20.1	19.6	26.9	22.8	14.7	15.3	21.3	12.6	18.1	13
chrIII	8237923	8239352	C02F5.8	2.5	7.4	1.7	0.8	0.4	0.6	1.2	2.1	0.5	1.1	0.7	0.9	0.3	2.4	0.7	0.6	0	0.1	0.7	1	0.9	0.2	2	2.6	0.1	0	0.5	2.7	6.6	1.5	8.1	1.2	2	1.9	3.6	1.7	1.1	1.7	2.8	1.3	1.5	2.1	1.1	7.7	4.8
chrIII	8243047	8244023	C02F5.9	114.3	70.9	131.1	174.7	248.4	244.1	227.6	258.9	253.7	259.9	207.6	174.5	166.8	132.2	155.6	356.7	303.1	151.3	228.8	254.2	229.8	223.3	205.2	203.5	326.4	309.4	192.9	199	194.6	188.3	137.2	184.3	193.7	195.8	181.4	104.3	82.5	90.9	82.7	146.5	140.1	163.4	145.2	74.4	98.8
chrV	5876352	5879925	C02G6.1	3.1	0.9	2.5	2.3	1.2	0.8	0.9	0.8	0.7	1	3.4	3.8	3.8	2.1	2.3	0.3	0.1	2	0.8	0.9	1.1	1	1	0.9	0.1	0.1	0.7	1.4	2.2	0.2	0.3	2.1	2.4	2.3	2.3	0.6	0.3	0.4	0.3	0.3	0.4	1.7	2.3	0.6	0.5
chrV	5872066	5874897	C02G6.2	0.1	0	0.1	0.1	0.5	0.1	0.3	0.3	0.1	0.2	0.3	0.4	0.2	0.1	0.1	0	0	0.2	0.2	0.3	0.2	4.3	4.7	4.7	0	0	0.2	5.2	0	0	0.1	0.5	0.1	0	0	0	0	0	0	0	0	0.1	0.1	0.1	0.2
chrV	5881093	5882433	C02G6.3	2.4	0.8	1.2	17.6	1	0.2	0.5	1.4	0.6	0.8	9.5	11.2	3.8	4.7	5	0	0	8.2	1.1	1.7	1.4	0.3	0.5	0.2	0	0	0	0.9	14.9	4.7	6.3	8.3	9.3	6.8	5.6	13.2	26.9	21.8	18.9	6.5	8.1	8.3	2.5	11	9
chrV	7388370	7389852	C02H6.1	0	0	0	0	0	0	0	0.2	0	0	0	0	0.1	0	0	0	0	0	0	0	0	0.1	0	0	0	0.1	0	0	0	0	0.7	0	0.1	0	0.1	0.1	0	0.1	0	0	0	0	0	0.3	0.2
chrV	7390507	7392068	C02H6.2	9	7	12.6	4.1	2	1.2	2.9	2.9	1.7	2.7	4.9	3.9	4.3	3.9	3.4	0.2	0	3	1.4	1.4	0.8	2.1	1.7	3.6	0.1	0.1	1.1	2.2	9.1	1.2	8.6	5.7	3.7	5.6	6.4	0.9	4.2	3.9	3.1	1.6	1.2	8	3.4	8	5.9
chrX	763767	766732	C02H7.1	5.9	2.6	5.6	2.5	0.6	0.3	0.5	0.4	0.3	0.4	1.2	1.2	0.8	3.3	2.4	3.4	4.2	1.9	0.4	0.5	0.5	0.8	1.1	0.8	3.3	3.1	0.5	1.1	1.7	4.9	8.4	2.7	1.5	2	1.2	10.3	9.1	13.9	11.4	8.4	8.6	2.3	1.6	9.7	6.8
chrX	731158	735671	C02H7.2	1.3	0.8	0.9	0.9	0.1	0	0.1	0.1	0	0.1	0.9	0.8	0.4	1.2	0.9	0	0.2	0.6	0	0.2	0.1	0.3	0.4	0.2	0	0	0	1.1	0.1	0.2	0.8	1.4	0.8	0.6	0.9	0.3	0.7	0.7	1	0.1	0.5	1	1	0.6	0.1
chrX	751209	759731	C02H7.3	6.8	7.5	11.2	5.9	2.4	2	2.4	1.9	1.5	2.3	6.1	5.9	5.8	9	7.4	0.6	0.1	5.6	1.9	3.1	1.8	8.3	7	6.1	0.6	0.5	1.5	9	5.2	7.2	12.2	6.3	5.7	6.7	6.3	17.4	18.7	25.9	25.9	11.8	13.8	9.8	8.9	21.1	15.3
chrX	11257295	11260160	C03A3.1	8.8	7	12.7	7.3	1	0.6	0.7	1.1	0.9	1.3	6.7	6.4	5.1	9.1	6.4	1.7	1.1	4.2	1.3	1.2	1.4	1.4	1.3	1.1	1.3	1.2	0.8	3	7.1	25.3	31.5	4.3	5.9	6.2	6.9	35.1	37.5	54.9	47.6	33.3	36.8	14.9	8.6	46.8	35.5
chrX	11262780	11266258	C03A3.2	58.5	30.4	58.8	34.7	24.8	21.7	22.1	21	23	20.7	54.1	47.2	42.3	35.1	41.2	35.5	28.8	21.5	15.2	21.7	17.6	17.5	12.6	10.1	33.6	30	17.1	24.3	44.3	33.4	30.2	43.1	35	38.3	35.3	27.6	26.3	36.6	44.6	28.7	28.6	33.5	36.9	33.7	30.4
chrX	11267325	11268966	C03A3.3	1.1	0.6	0.9	0.6	0	0.1	0	0.2	0	0	0.2	0.4	0.6	0.8	0.3	0.3	0	0.2	0	0	0.1	0.2	0.2	0.1	0.1	0	0	0.3	0	0.3	0.6	0.4	0.1	0.4	0.3	1.7	1.2	1.4	2.7	0.2	0.5	2.2	0.3	1.1	0.6
chrV	5170897	5172917	C03A7.10	0	0.3	0.1	0.8	0.2	0.2	0.1	0.2	0.1	0.1	0.9	0.7	0.8	0.8	0.5	0	0	0.2	0.2	0.3	0	0	0.2	0.2	0.1	0	0.2	0.4	0.5	0.2	0	0.4	0.9	0.9	0.9	0	0	0	0.2	0	0.1	0.8	0.6	0	0.2
chrV	5175009	5177240	C03A7.11	7.2	3.5	9.4	6.6	3.5	1.3	3.2	5.2	1.2	5.4	6.1	6.4	5.5	3.3	1.6	2.2	2.5	1.6	1.7	1.5	3.4	13.3	13	9.2	2.8	3.1	2.9	17.6	4.5	6.6	10	4.8	4.3	2.4	2.7	7	7.5	11.4	12.5	9.6	8.6	5.5	4.1	9.6	9.4
chrV	5178319	5181440	C03A7.12	0.2	0.9	0.1	0.1	2.7	1.2	2.7	2.5	0.9	3	0.7	0.6	0.3	0.6	0	0.3	0	0.1	1.7	1	1.3	3.8	2	1.2	0.1	0.1	0.6	7.6	0.7	1	1.4	0	0	0.2	0.2	1.5	1.3	2.2	2.6	1.1	1.6	0	0.2	1.9	1.8
chrV	5191113	5192515	C03A7.13	0.2	0.4	0.2	0	2	1.1	2	2.1	1.2	2	0.4	0.2	0.1	0.8	0.1	0	0	0	1.2	1.4	1.2	2.7	1.7	0.7	0	0	1	4.1	0.3	0.3	0.3	0.4	0	0.5	0.1	0.7	0.3	0.9	1.1	0.8	0.3	0.3	0.1	1.5	1.2
chrV	5192976	5194592	C03A7.14	163	7.2	108.8	29.4	19.6	4.9	34.2	20.5	10.9	17.9	40.2	30.6	78	46.5	21.5	0.7	0	68.7	10.7	84	9.9	1.2	1.9	0.2	0.1	0.1	7.7	1.1	44.2	32.2	119.4	100.7	64.2	78	41.5	28.5	120.3	149.3	277.3	10.2	48.1	122.3	132	145.4	99.7
chrV	5181895	5183701	C03A7.2	0	0	0	0	0.2	0.3	0.2	0.3	0.4	0.3	0	0.3	0	0	0	0	0.3	0	0.6	0.4	0.8	0.2	0.4	0.3	0.1	0.1	0.6	0.3	0	0.1	0.5	0	0	0.1	0.1	0.4	0.2	0.1	0	0.1	0.3	0	0	0.3	0.5
chrV	5165709	5167225	C03A7.3	0	0.2	0.1	0	0	0	0	0	0	0	0.1	0	0	0.1	0	0	0	0	0	0	0.1	0	0	0	0	0	0	0	0	0	0	0	0	0.1	0	0	0	0	0	0	0	0	0.1	0	0.1
chrV	5158607	5159882	C03A7.4	127.2	4.2	89	12	17.2	3.7	27	14.5	9.3	13.9	22.2	15.6	56.6	15.6	11.4	0.1	0	33.2	9.2	76.3	8.3	0.4	1.7	0	0	0	5.6	0.1	17.6	2.3	9	31.6	28.6	48.4	18.3	2.8	11.7	13.2	27.3	1.1	3	25	42.6	11.7	7.8
chrV	5154041	5155501	C03A7.5	1.7	1.5	1.8	0	0	0	0.1	0.1	0	0.1	0.1	0.3	0.1	1	0.7	0	0	0.1	0	0.1	0	0	0	0	0	0	0	0.2	0.3	0.1	0	1.3	0.3	0.9	0.4	0	0	0	0.2	0	0	1.9	0.2	0.1	0
chrV	5156637	5157745	C03A7.6	0.2	0	0	0	0	0	0.1	0	0	0	0	0	0	0	0	0	0	0	0	0	0	0	0	0	0	0	0	0	0	0	0	0	0	0	0	0	0	0	0	0	0	0	0.2	0	0
chrV	5160586	5161877	C03A7.7	95.1	3	67	9.2	13.6	3.8	26.1	14.4	8.8	12.8	16.4	14	44.1	10.6	5.4	0.1	0	20.5	7.3	64.5	7.2	0.5	1	0.1	0	0	4.9	0.3	13.1	2.9	13.1	21.8	20	41.4	12.3	3.5	15.2	15.2	29.4	1.4	5	21.6	29.4	15.7	13
chrV	5163379	5164743	C03A7.8	94.1	3.3	71.4	12.4	16.1	4	28.8	15.4	9.6	13.6	21	14.2	52.5	18.1	8.9	0	0	33.3	10	77	8.5	0.6	1.4	0.1	0	0	6	0.5	18.8	8.2	28.8	30.3	27.7	42.6	17.3	8.1	35.2	37.5	76.2	3.2	12.4	40.3	51.6	37	28.5
chrV	5168258	5169670	C03A7.9	0	0.1	0	0.1	0	0.1	0	0.1	0.1	0	0	0.5	0.5	0.3	0	0	0	0.1	0	0.1	0.1	0	0	0	0.1	0	0	0	0	0	0	0	0	0	0.3	0	0	0	0	0	0	0.4	0	0	0
chrX	6373611	6375555	C03B1.1	0	0.3	0	0.1	0	0	0.1	0.1	0.1	0.1	0	0.1	0	0	0	0	0	0	0	0	0	0	0	0	0.1	0.1	0	0	0	0	0.3	0	0	0	0	0.1	0.1	0	0	0.2	0.2	0	0	0	0
chrX	6357710	6357919	C03B1.10	0	0	0	0	0	0	0	0	4.3	0	0	0	0	0	0	33.8	21.6	0	0	0	0	0	0	3.3	29.5	16.7	0	5.9	0	4.1	0	0	0	0	0	7.1	0	0	0	0	5.6	30.1	0	3.7	5.4
chrX	6376400	6377651	C03B1.12	184.2	163.8	235.5	243.2	150.8	144.6	124.1	145.3	139.9	142.2	269.3	240.3	238.8	247.2	244.5	962.1	967	201	126.7	151.7	129.6	146.5	141.9	141.4	942.1	973.4	132.4	188.2	283.2	907.7	479.8	187.5	246.3	282.3	323.2	634	479.9	458.3	445.9	687.6	609.5	170.3	236.5	466.2	521.7
chrX	6335238	6337787	C03B1.13	4.8	2.7	6	4.2	2.9	2.7	3.2	4.3	2.5	4.4	5.1	6.5	5	2.9	4.3	9.3	6.2	2.9	1.8	3.9	1.8	8.1	6.4	7.5	6.3	9.2	2.9	8.4	5	5.3	3.8	6.1	4.7	3.4	3.2	3.5	4.1	4.5	5.1	3.9	5.3	3.2	4.2	3.9	4.6
chrX	6359371	6360724	C03B1.14	2	3	3.6	2.9	3.9	2.9	4	3.4	2.7	3.4	4	2.8	2.2	3.6	2.6	0.6	0	1.7	2.4	2.9	2.5	1.9	4.1	2.7	0.3	0.5	2.4	3.8	4.1	1.2	3.9	6.4	2.9	4.7	4.3	1.1	0.2	1.8	1.3	0.6	1.1	2.8	3.5	2.6	2.2
chrX	6367577	6373121	C03B1.2	0.7	0.5	0.9	0.4	0	0.1	0.1	0	0.1	0.1	0.1	0.9	0.8	0.5	0.4	0	0	0.6	0	0.1	0	0.5	0	0.1	0	0.1	0.2	0.6	0.6	0.3	0.6	0	0.3	0.4	0.7	0.1	0.5	0.2	0.4	0.1	0.3	0.2	0.4	0.2	0.5
chrX	6365976	6366795	C03B1.3	0	0.4	0	0	0	0	0	0	0	0	0	0.6	0	0.6	0.2	0	0	0	0	0	0	0	0	0.3	0	0	0	0.2	0	0.3	0.4	0	0	0	0	1.2	0	0	0	0	0	0	0.4	0	0
chrX	6364459	6365681	C03B1.4	0	0.1	0	0.2	0	0	0.1	0	0	0	0	0.2	0	0.3	0.2	0.4	0	0.2	0	0	0	0.5	0.2	0.4	0.1	0	0	0.1	0	0.3	0.9	0.5	0	0.1	0.4	0.2	0	0.2	0.7	0.1	0.5	0	0.1	0.3	0.6
chrX	6355548	6357745	C03B1.5	2.3	1	1	2.1	0.4	0.1	0.1	0.1	0.3	0.1	1.8	1.5	0.4	1.4	1.2	0	0	1.2	0.3	0.2	0.3	0.2	0.2	0.2	0	0	0.2	0.3	1.3	0.5	0.8	2.2	1	1	0.7	3	3.3	5.6	7.4	1.2	1	1.3	0.8	0.7	1
chrX	6350150	6351840	C03B1.6	0.2	0	0.1	0.1	0.1	0.1	0.1	0	0.1	0.4	0	0.3	0.1	0.3	0.4	0	0	0.2	0.1	0.1	0	0.3	0.2	0.2	0	0	0	0.1	0.2	0	0.1	0	0.2	0.1	0	0.1	0	0	0	0	0	0.2	0.4	0.2	0.2
chrX	6342119	6345993	C03B1.7	3.7	1.8	4	1.4	2.1	1.8	2.2	2.7	2.5	2.7	2.3	2.2	2.1	1.9	2.1	9.9	10.2	2	1.7	1.9	2.1	2.5	1.6	1.8	9.6	10.8	2.1	2.2	1.4	7.6	5.9	0.7	1.5	2	1.5	5.4	5.2	6.8	6.7	5.6	6.9	2	1.9	5.5	5.5
chrX	6346322	6347077	C03B1.9	0	0	0	0	0	0.1	0	0	0.1	0.1	0	0	0.2	0.1	0	0	0	0	0.1	0	0.1	0	0	0	0	0	0	0	0	0.1	0.1	0	0.2	0	0	0	0	0	0	0.1	0	0	0.4	0	0
chrIII	7715425	7716381	C03B8.2	2.1	0.8	3.1	0.7	8.1	9	8.4	9.3	7.2	12.2	4.8	5.7	2	1.7	1.4	3.7	2.7	1.7	8	5.4	6.5	8.3	6.9	7.3	3.1	2.8	7.3	8.1	2.3	4.8	9.4	2.5	1.4	4.2	2.2	4.3	4.8	3.7	4.4	9.4	4.3	1.6	2.1	7.8	8
chrIII	7712265	7717253	C03B8.3	0	0	0	0.1	4.2	1.2	4.3	3.1	1.8	3.1	0.3	0.3	0.4	0.1	0.2	0.3	0.9	0.5	0.9	3.1	0.9	25.5	24.8	29	0.3	0.3	1.1	33.6	0.4	0.7	1.2	0	0.2	0.2	0.2	0.6	0.5	0.4	0.2	0.3	0.3	0	0.1	0.8	0.3
chrIII	7700068	7709407	C03B8.4	15.7	12.3	17.7	15.3	34.8	37	34.9	41	37.7	42.3	18.2	19.2	17.8	13.7	12.4	75.6	79.7	10.7	26.7	21.9	26	23.8	23.3	22.5	74.8	76.1	23.8	34.5	14.4	72.8	63.5	18.5	16	16.7	14.8	49.3	37	45.5	41.1	87	53	19.1	15.9	43.1	57.2
chrIII	4083977	4086618	C03C10.1	311.4	203.8	479	209.8	219.8	224.4	222.2	215.4	197.6	217.8	213.2	209.5	214.4	238.9	198.5	498.8	422.9	171.5	196	224.6	201	295.5	283.8	298.3	480.8	435.4	188.6	319.7	220.8	396.2	365.3	190	194.4	219.1	221.2	335.7	292.4	313.2	288.7	385.7	318.8	202.8	216.5	403.7	368
chrIII	4091051	4093254	C03C10.2	0	0	0	0	1.8	0.4	1.8	0.9	0.8	0.8	0	0.1	0	0	0	0.2	0	0	0.7	1.6	1.1	21.3	21.7	19.8	0	0	0.5	26.6	0.1	0.1	0.6	0	0.1	0.1	0	0	0.1	0.1	0.1	0.2	0.1	0	0	0.1	0.1
chrIII	4093279	4094899	C03C10.3	37.9	17.3	34.4	36.8	175.5	216.4	150.3	223.6	193.2	247.4	39.5	39.3	32.6	23.1	18.2	1108.1	1036.9	27.5	163.4	96.5	173.5	14.9	21.6	17.1	1110.4	1035	152.8	17.7	22.9	716.6	513	36.1	36.3	31.5	24.5	392	206.8	266	231.6	401.7	438.9	42.6	33.2	201.9	320.2
chrIII	4096874	4098107	C03C10.4	55.1	49.6	53.1	83	67.9	53.1	73.5	72.4	58.5	77.5	52.2	42.1	40	76.1	53.1	163.5	152.4	26.3	57.7	65.7	57.7	79.6	119.6	103	162.9	156.3	45.8	111.9	48.9	95.4	65.6	38.6	58.5	62.9	63.2	73.5	64.4	66	66.7	95.6	74.5	46.9	23.7	41.7	71.8
chrIII	4090265	4090532	C03C10.5	0	0	0	5.4	1.6	0	0	2.1	1.6	1.6	0	0	2.4	1.3	0.9	0	0	0	1.5	0	0	0	0	3.8	12.8	9.6	2.4	3.4	0	209.9	294	0	0	4.4	0	239.2	306	213.1	296	322	221.9	3.8	0	372.9	287.8
chrIII	4096018	4097114	C03C10.7	1.2	0.1	0	0	0.1	0.1	0	0.2	0.1	0.1	0.1	0	0	0.1	0.1	0	0	0.1	0.1	0	0.1	0.9	0.7	0.9	0.1	0	0	1	0	0.2	0.9	0.5	0	0	0.1	0.3	0	0.1	0.2	0.1	0.1	0	0	0	0.2
chrIII	4089777	4089912	C03C10.9	0	0	0	13.5	8.2	0	9.1	0	8.1	7.9	0	13.7	12.2	0	0	32.1	0	7.5	0	0	0	0	9	6.3	24	23.9	11.8	16.8	0	662	897.9	0	0	11.1	0	1382.6	1573.5	1015	1068.3	1466.2	1122.5	0	0	1117.1	753.8
chrI	10014720	10015487	C03C11.1	0.5	0.1	0	0.7	7.9	3.2	12.4	4.9	5.6	5.4	0.2	0.4	0	0.4	0.4	0.2	0.8	0.3	6.4	10.8	5.6	146.5	135.7	157.2	0.3	0.2	3.6	119	0.3	0	1	0	0.2	0.5	0.3	0.4	1.1	0.5	0.5	0.1	0.4	0	0	1.2	1.3
chrI	10016767	10018105	C03C11.2	9.3	2.5	8.3	5.7	3.3	1.4	2.4	2.2	2.9	1.5	19.2	19.6	13.3	4.3	4.4	14.9	6	3.9	2.7	3.3	2	67.3	58.1	60.1	11.1	7.8	3	85.7	7.8	0.5	1.2	9.4	7.9	10	7.7	4.2	2.3	1.3	1.3	3.8	2.3	0.5	5	1.4	0.8
chrI	9668469	9670706	C03D6.1	8.5	10.2	9.4	5.6	2.4	1.4	2.1	3.5	1.9	4.5	6.5	6.1	7.2	8.5	7	0.2	0.9	2.4	1.6	2.7	1.2	3	2.3	4.7	0.2	0.2	0.8	6	7.4	1	0.9	9.6	9.3	10.8	9.1	2.5	2.7	4	1.2	2.5	1.2	13.1	6.5	0.9	1
chrI	9665245	9668655	C03D6.3	17.4	10.4	21.8	11.5	23.1	20.8	19.3	25.2	22.6	27.9	14	15.9	12.5	13.1	9.7	66.6	64.4	7.7	18.4	13.9	19	14.5	13.2	10.8	68	63.4	16.7	17.2	11.6	52.5	43	14.2	11.5	11.4	11.2	37	27.7	43.3	39.4	38.5	48.9	11.8	11.3	40.2	40.4
chrI	9660165	9665135	C03D6.4	20.3	13.4	24.4	17.5	54.9	54.9	48.5	57.7	55.6	59.8	22.7	23.4	20.2	22.6	18.4	88.6	81	14.1	46.9	42.5	47.3	25.1	26.4	21.9	88.1	81.7	44.3	32.1	17.2	55	37.5	17.5	17.4	17.7	17.1	39.5	25.2	32.5	33	57.2	45.2	18.9	19.4	29.8	39.3
chrI	9658264	9660064	C03D6.5	2.6	2.5	4.4	3.4	38.2	46.2	36.9	43.7	42.3	46.9	7.3	6.9	3.9	1.1	1.6	73.1	59.5	1.6	42.6	34.4	42.5	28.2	29.9	27.7	71.9	61.7	40.4	20.6	3	29.9	31.1	1.5	3.8	4	1.7	23.6	13	10.3	10.7	22.1	19.3	0.2	1.2	14.1	20.3
chrI	9657048	9657841	C03D6.6	1.3	0.1	0.8	0.6	34.4	32.8	33.7	39.3	31.7	43.6	0.7	0.4	1.2	0.7	0.3	37.2	35.9	0.5	25.1	17.3	30.1	60.1	64.2	67.6	40.9	33.4	22.2	67.5	1.1	15.6	13.5	0.7	1.3	0.9	0.8	17.2	9.9	7	9.9	15.1	7.8	0	0.1	5	13.6
chrI	9669403	9670132	C03D6.8	128.5	215.9	157.2	171.9	143.3	120.7	142.5	152.5	132.6	157.2	182	169.9	173.3	287.6	178.7	292.2	298	184.8	90.5	111.4	94.2	118.2	87.5	81.1	277	300.5	82.8	115.6	225.7	289.3	324.9	264.9	215	202.9	201.3	252.9	326.6	321.4	252.7	375.1	308.9	177.5	256.7	384.1	384.3
chrV	11291169	11292551	C03E10.1	0.2	0	0	0	0	0	0	0	0	0	0	0	0	0	0	0	0	0	0	0	0	0	0	0	0	0	0	0	0	0	0.1	0	0	0	0	0	0	0	0	0	0	0	0	0	0
chrV	11286959	11288208	C03E10.3	0.6	0.5	0.9	1	0.9	0.5	0.8	0.1	0.2	0.4	0.9	0.5	0.8	1.3	1.1	0.5	0.9	0.3	0.4	0.4	0.2	0.1	0.5	0.5	0.2	0.2	0.3	0.8	0.4	0.4	0.3	1.1	0.7	0.7	1.6	0.3	0.7	0.3	0.7	0.2	0.3	0.9	1.6	0.3	0.5
chrV	11282551	11286024	C03E10.4	21	11.5	28.4	19.8	48.6	41.7	40.3	42.8	41.7	43.1	17.5	17.8	15.1	20.7	19	42.6	41.8	12	30.1	27.1	30.6	31.8	28	27.6	40.7	39.1	29.4	42.2	16.9	40.3	39.3	13.7	15.1	19	18.2	31	20.6	30.3	40.2	33.1	33.7	28.6	21.2	31.9	34.4
chrV	11273129	11278141	C03E10.5	0	0	0	0	74.5	41.5	51.7	37	27.5	33.4	0.1	0.1	0	0	0	0	0	0	91.9	64.9	75.2	0.1	4.1	2.3	0	0	76	1.7	0	0	0.1	0.1	0	0	0	0	0	0.5	0	0	0	0.1	0	0.1	0.2
chrV	11271332	11272451	C03E10.6	0	0	0	0.1	10.9	8.9	6.5	11	5.2	10.6	0	0	0	0	0	0	0	0	13.3	6.7	10	0	0.9	0.5	0	0	7.5	0.3	0	0.2	0	0.5	0	0	0	0	0	0	0	0.1	0	0.2	0	0	0
chrX	5390697	5394108	C03F11.1	1.1	1.7	0.7	0.6	0.4	0.1	0.2	0.2	0.3	0.2	0.8	0.6	0.9	1.7	1.3	0.3	0	0.9	0.2	0.2	0.1	0.5	0.7	0.3	0.3	0.3	0.2	0.9	1.3	0.3	1	0	1.1	1	0.8	0.8	0.7	0.7	1.4	0.3	0.6	1	1	0.9	0.3
chrX	5394530	5396896	C03F11.2	2.5	0.6	1.5	2	0.6	0	0.9	0.5	0.2	0.8	2.5	2.9	0.9	1.1	0.7	0	0	3.3	0.2	1.4	0.2	0.4	0.4	0.7	0	0	0.4	0.6	1.9	0.8	1.8	3.3	1.2	2.1	0.7	3.1	3.2	5.4	9.1	1.4	2.6	3.3	1.7	4.1	2.1
chrX	5397643	5400552	C03F11.3	35.3	24.6	35.8	32.7	20.2	13.2	17.9	16.8	15.4	17.2	39.2	38.3	39	32.3	39.5	0.5	0	32.3	10.5	16.2	11	17.1	18.6	15	0.6	0.8	9.3	15.9	30.6	6.1	9.7	36.2	37.9	43	42.4	9.6	11.5	15.4	17.3	7.8	8.8	26.4	24.8	12.4	9.4
chrX	5401452	5406411	C03F11.4	3.9	1.8	3.2	1.4	3.7	2.8	3.2	2.9	2.9	2.7	2.3	2.1	1.2	2	2.2	0.2	0.2	1.6	2.6	3.5	2.8	1.9	3.1	2.1	0.3	0.3	2.1	3.1	1.1	0.8	2.3	2.1	0.8	2.2	2.1	1.7	2.2	2.5	3.7	0.6	0.8	3	2.2	1.7	1.7
chrX	8542813	8545974	C03G5.1	123.9	106.7	114.4	150.2	60.5	49.7	56.8	50	48.3	52.8	125.5	127.5	128.5	158.3	152	66.5	62.5	125.7	57.4	72.4	54.4	94.5	113.9	90	65	64.1	53.4	93.2	182.8	73.4	78.5	180.5	185.7	158	179.2	114.8	98.5	94.7	95.4	93.3	70.6	104	124.2	86.4	87.6
chrX	8537054	8537460	C03G5.10	21	9.4	29.7	22.2	24.8	27.6	31.2	45.5	25.6	52.3	88.7	100.6	70.3	11.7	16.6	0	0	13.6	31.8	16.4	40.6	2.2	0.8	0.8	0	0	25.3	1.1	14.8	0	0.2	37.7	28	46.3	35.4	1.7	0.6	0.7	0.8	0.1	0.4	8.8	43.2	0.5	0.1
chrX	8537895	8538306	C03G5.11	33.2	7.2	66.4	25.8	31	45.1	59.4	64.1	36	75.9	163.1	138.2	108.5	6.8	12.7	0	0	12.6	47.3	22	64	1.1	1.2	0.7	0	0	63.7	1.5	13.8	0.1	0	45.8	22.2	21.3	22.6	0.5	0	0	0.3	0	0	1.5	69	0	0
chrX	8538686	8539037	C03G5.12	6.6	2.9	22.3	5.6	12.3	24.8	27.3	62.2	27.6	70.9	44.7	33.9	22.1	1.1	2.6	0	0	2.5	25	10.8	28	0.2	0.5	0.8	0	0	27.9	0.8	3.2	0.2	0.4	13	4.3	6.2	4.1	0.3	0	0	0.8	0	0.1	1.1	5.5	0	0.6
chrX	8541092	8541443	C03G5.13	7.2	2.9	24.1	7.6	15.4	31.4	34.7	80.6	34.7	87.7	51.4	51.2	25.7	1.6	3.1	0	0	4.1	36.3	14	44.7	0.2	0.5	0.8	0	0	40.1	0.8	5.4	0.2	0.4	10.2	4.3	9.9	5.5	0.3	0	0.3	0.8	0	0.1	1.1	11.2	0	0.6
chrX	8541811	8542231	C03G5.2	20.7	7.7	24.2	20.4	24.6	30.9	34.4	52.5	29.3	63.1	95.4	116.2	72.2	10.4	16.2	0	0	11.3	33.1	17.3	40.1	1.3	0.9	1.4	0	0	29.9	1.1	12.1	0.1	0.2	32	25.8	37.9	32.7	1.8	1.8	0.5	1	0.1	0.5	6.4	38.6	0.3	0.1
chrX	8528196	8531023	C03G5.7	90.8	156.4	82.9	122.3	22.9	12.1	28	19	12.7	18.9	80.2	80.8	77.3	192.9	117.1	0	0	71.3	14.1	30.8	18.2	96.1	75.6	77.4	0.1	0.1	16.9	133.8	164.1	7.5	45.2	138.7	115.3	139.9	146.8	12.7	39.2	29.6	44.4	5.8	17.5	210.6	133	55.7	39.4
chrX	8534616	8535053	C03G5.8	27.1	8.4	34.2	31.2	33.2	41.4	44.6	67.2	40.7	82.9	124.3	145.2	90.8	13	19.4	0	0	18.4	43.2	22.9	57.7	3.2	1.1	1.5	0	0	48.2	0.8	24.3	0.9	0.2	38.5	37.8	51.6	39.9	1.9	1.1	0.9	2.2	0.1	0.5	11.2	64.2	0.4	0.5
chrX	8535415	8535766	C03G5.9	7.2	2.9	23.5	6.8	13.5	25.3	28.4	63.1	28.6	73.5	44.3	35.6	21.7	1.1	3.5	0	0	2.7	26.1	11	27.5	0.2	0.5	0.8	0	0	25.8	0.8	3.2	0.2	0.4	7.4	4.3	6.5	4.1	0.3	0	0.3	0.8	0	0.1	1.1	5.3	0	0.6
chrV	7342169	7343818	C03G6.10	1.1	1.5	2.1	0.7	0.3	0.2	0.2	0.1	0.2	0.4	1	0.6	1.6	1	1.3	0	0.3	0.3	0.1	0.2	0.5	0.2	0.2	0.3	0	0	0.2	0.3	0.6	0.9	2.1	2.2	0.7	0.8	0.7	1	2	2.3	1.8	1.3	1.7	4.3	2.3	2.2	2.1
chrV	7350862	7352218	C03G6.11	0	0	0.1	0	0	0	0	0	0	0	0.1	0	0	0	0	0	0	0	0	0	0	0	0	0	0	0	0	0	0	0	0	0	0	0	0	0	0	0	0	0	0	0	0	0	0
chrV	7348192	7350049	C03G6.12	0	0.1	0.2	0	0	0	0	0.1	0	0	0.1	0	0.3	0.2	0	0	0	0	0	0	0	0	0	0	0.1	0.2	0	0.1	0.4	0.5	0.9	0.5	0.3	0.2	0.3	0.7	1	1.2	2.4	1	1.4	0.1	0.1	1.7	1.2
chrV	7354457	7356766	C03G6.13	0	0.1	0.4	0.2	0.1	0.2	0.2	0	0.1	0.1	0.6	0.2	0.3	0.1	0.4	0	0	0.1	0	0.7	0.1	0	0.1	0.2	0	0	0	0	0.5	0.2	2.2	2.4	0.1	0.2	0.9	0	0	0.1	0.2	0	1.4	1.8	1.2	3.1	2.5
chrV	7359978	7361755	C03G6.14	0.9	0.1	0.7	1.5	0.7	0.3	0.3	0.9	0.4	0.6	2.1	1.1	0.6	1.1	1.2	0	0	0.4	0.2	0.1	0.7	0.3	0.7	7.9	0	0	0.3	0.3	0.2	0	0.1	0.5	1.2	0.3	0.2	0	0	0.1	0	0	0	11.6	1.4	0.1	0.1
chrV	7362297	7364186	C03G6.15	28.1	11.7	35.5	64	21	17.7	24.8	23.6	24.4	25.6	56.1	40.7	19.8	40.1	38.4	0.1	0.2	24.7	13.8	5.6	32.2	9.1	18.3	56.5	0	0	30	25.7	4.5	0.6	1.9	10.6	4.5	8.8	4.1	1	0.6	1.1	2.2	0.7	2.1	43.5	20	5.7	4.3
chrV	7377878	7379466	C03G6.16	0.2	0	0	0	0	0	0	0	0	0.1	0	0	0	0.1	0	0	0	0	0	0	0	0	0.2	0	0	0	0	0	0	0	0	0	0	0	0	0	0	0	0	0	0	0	0.2	0	0
chrV	7379735	7381066	C03G6.17	1.3	5.7	3.2	3	2.3	2.8	2.5	2.6	1.5	1.8	2.9	2.7	4.5	14.1	6.7	0.2	0	3.4	1.3	2.1	1.6	6	4.4	3.8	0	0	1.4	7.2	4.4	0.7	4.1	8	4.6	4.5	8.3	1.8	3.1	5.5	4.8	0.8	1	2.9	4.2	2.8	1.9
chrV	7382002	7383291	C03G6.18	2.7	2.4	2.8	3.1	3.7	2	2.6	2.1	2.1	2.5	2.1	2.7	1.9	3.7	2.4	1.1	0.6	1.4	1.5	2.8	2.3	6.1	5.1	3.8	0.5	0.4	1.7	5.8	3.2	0.6	3	4.7	1.7	2.3	2.6	1.5	2.4	2.4	3.8	1.5	0.7	2.2	1.8	2.9	3.3
chrV	7384213	7386288	C03G6.19	14.9	18.3	18.2	14.6	18.8	10.8	16.2	11.5	10.2	13	9.9	10.5	10.3	16	13.1	2.9	2.1	8.8	10	19.7	11.5	26.1	22.2	19.6	2.5	1.9	11.1	25.2	16.6	3.3	15.2	23.2	13.6	12.2	18.6	6.6	10.6	13.4	16.4	6.6	4.5	14.4	10.1	17.7	14.5
chrV	7374371	7375576	C03G6.2	0.7	0.4	0.8	0.4	0	0	0	0.1	0	0	0.2	0.6	1	2	0.9	0	0	0.2	0.1	0.1	0.1	0.2	0.2	0.3	0	0	0	0.5	0.5	0	0	0	0.6	1.1	1.2	0	0	0	0.2	0	0	2.6	0.7	0.1	0.1
chrV	7369741	7372113	C03G6.3	1.8	1	1.9	2	1.3	0.8	2	1	0.4	0.9	1.6	2.3	2.4	1.8	1.7	0	0	1.4	0.7	0.9	0.9	2.7	1.1	0.9	0	0	0.5	2.5	3.3	0.1	0.3	1.5	1.1	3.2	3.1	0	0.1	0.1	0.1	0	0.1	1.6	1.7	0.3	0.1
chrV	7365224	7365906	C03G6.5	25.3	19.2	27.4	29.2	8.9	5.6	8.6	4.1	2.3	4.8	32.8	33.9	23.6	20.4	21.4	0	0	19.2	3.6	4.7	3.2	28.6	8.7	10.2	0	0	3	29.2	24.2	0.4	4.8	24.4	23.8	44.5	41.4	0	1.3	0.8	1.2	0.2	0.3	22.5	17.7	3	0.8
chrV	7357419	7358864	C03G6.6	0	0	0	0	0	0	0.1	0	0	0	0	0	0	0	0	0	0	0.1	0	0.1	0	0	0	0	0	0	0	0	0.2	0.3	0.2	0	0	0.1	0.1	0.5	0.7	1	2.2	0	1.1	0	0	0.4	0.5
chrV	7353021	7354236	C03G6.7	0.1	0.1	0.1	0	0	0	0.1	0.1	0	0	0.1	0	0	0	0	0	0	0	0	0	0	0	0	0	0	0	0	0	0	0	0	0	0	0	0.1	0	0.1	0	0	0	0	0	0.1	0	0
chrV	7346671	7348117	C03G6.8	0.8	0.8	1.5	1.2	0	0.4	0.4	0	0.1	0.1	0.4	0.5	0.4	0.8	0.4	0	0	0.2	0	0	0.2	0.5	0.2	0.3	0.1	0	0.1	0.3	0.6	2.1	4.1	0.3	1.3	1.1	1	1.5	2.2	2.3	2.1	2.9	2.8	4.2	1.7	4.5	3.5
chrV	7344042	7345216	C03G6.9	0.1	0	0	0	0	0	0	0	0	0	0	0	0	0	0	0	0	0	0	0	0	0	0	0	0	0	0	0	0.1	0.1	0	0	0	0	0	0.2	0.1	0.2	0	0	0.2	0.3	0	0.3	0
chrX	15689389	15696355	C03H12.1	15.1	8.7	16.8	10.3	8.1	7.5	7.2	8.6	8.1	8.6	12.1	12.4	10.6	10.6	12.3	19.8	22.8	10.4	6.2	7.1	6.6	5.2	6.6	5	20	21.2	6.1	7.4	12.1	42.5	20.1	15.4	15.5	11.4	11.7	25.1	19.4	33.3	25.8	36.5	49.8	10.4	18.1	21.8	20.6
chrII	402659	404235	C03H5.1	10.8	6.4	6.8	15.5	13.2	11.1	14.3	3.2	6.3	3.7	17.8	14.2	9.2	22	19.7	0	0	15.1	4.6	9.2	5.3	1.7	1.5	0.9	0	0	3.3	3.5	46	3.7	2	49.9	51.2	33	61.4	1.5	3.7	4.2	4.5	0.6	5.5	25.4	51.9	3	2
chrII	388832	392737	C03H5.2	55.3	50.5	58.5	65.3	59.4	56.6	61.5	56.4	57.7	59.1	76.3	74.2	82.7	50.8	66.3	22.9	21.2	45.1	47.9	61.5	48.1	89.4	74.1	68.8	23	20.5	45.5	114.8	79.3	44.1	54.8	56.7	68.8	83.1	80.2	41.8	43.6	49.3	45.4	45.7	49.7	59.8	51.7	66.5	55
chrII	386193	387920	C03H5.3	24.9	18.7	32.4	20.6	42.4	40	35.3	46.2	41.7	51.4	24.9	27.4	23.5	25.7	25	76.4	82.7	23.8	33.9	25.5	33.6	24.1	22.4	17.3	77.8	85.8	30.3	19.8	19.5	55.2	46.7	21.4	25.5	19.8	18.1	43.9	33.6	39.6	39.7	41.7	47.3	18.1	22.9	34.6	47.3
chrII	375249	375835	C03H5.4	0	0	0	0.9	0	0.3	0	0	0	0	0	0.3	0	0	0.1	1.4	2.8	0.2	0.3	0	0.2	1.6	1.4	0.6	2.2	2.7	0	2.7	0.4	1	2.5	0	0	0	0	0.9	0.4	0	0	0.7	1.1	0	0.4	3.4	2.1
chrII	382272	385354	C03H5.5	7.2	3.3	9	7.8	5.6	2.8	4.4	4.5	3.4	4.6	9.9	9	6.2	7.3	8.2	0.4	1.2	6.1	3.7	5.1	3.4	5.3	4.5	4.5	1.1	0.9	3.5	5.4	7.8	2.5	3.6	7.5	6.9	6.9	6.8	3.2	4.5	5.1	7.3	2.7	4.4	6.7	6.2	5.2	3.3
chrII	392813	399976	C03H5.6	6.2	6.2	8.5	7.7	0.6	0.3	0.6	0.4	0.6	0.4	5.4	3.8	6.1	9	8.1	0.3	0	7	0.2	0.7	0.4	2.1	1.3	1.1	0.1	0.1	0.1	2.2	6.2	1.8	8.3	5.7	5.3	5.7	6.8	3.8	8	7.9	16.4	1	3.7	9.7	10.6	10.3	5.9
chrII	380572	382344	C03H5.7	0.5	0.1	0.1	0.8	0.2	0.3	0.2	0.1	0.2	0.3	0.5	0.1	0.2	1	0.6	8.7	15.7	0.2	0.2	0.1	0	0.1	0.2	0.2	9.1	11.3	0.1	0.3	0.2	9.1	4.6	1.5	1.1	0.3	0.6	2.2	2.4	2.3	3.5	6.4	4.1	1.1	0.2	2.9	4.7
chrX	13660448	13662893	C04A11.1	6.8	3	8.4	4.8	2.5	1.2	2.4	1.7	1.9	2.5	4.6	3.7	4.7	4.6	3.7	0.4	0	3.9	1.8	4.1	1.5	1.9	1.8	1.7	0.2	0.2	1.6	3.7	6.1	4.8	8.1	5.3	7	4	5.3	6.9	15.8	10.5	18.6	3.4	10.8	7.1	13.5	12.8	8.9
chrX	13665886	13668742	C04A11.2	0.9	0.4	0.7	0.8	1.8	2.1	1.4	2.3	1.8	2.8	1.1	0.9	0.9	0.9	0.7	25.6	30.9	0.4	1.8	1	2.1	0.4	0.2	0.3	26.1	28.8	2.6	0.4	0.9	45.7	30	0.8	1.1	0.4	0.5	26.7	19	24.5	26.6	35.6	53.8	1.1	1.9	27.4	27.7
chrX	13677121	13682008	C04A11.3	17.2	12.1	18.2	19.7	11.8	11.6	10.9	12.6	11	12.2	12.2	13.6	11.4	10.2	12.6	39.1	37.9	13.7	11	11.2	10.4	12.3	9.6	7.8	42.8	40.2	10.1	11.6	19	61.4	34.6	17.3	14.6	11.3	8.8	41.3	36.4	40.7	40.9	45.7	77.9	17.9	24	41.9	41.9
chrX	13687902	13695721	C04A11.4	21.2	12.4	19.6	15.1	7.8	7	9.4	8.7	7	8.5	11	9.7	9.1	9.6	11	9.7	9.1	9.3	6.8	8.4	6.4	8.1	6.4	7.8	9.8	9.3	7	9.8	25.2	18.2	23.3	21.8	15.5	11.2	11	14.4	15.1	15.1	18.6	14.1	26.3	21.7	25.9	26.4	22.4
chrX	13664516	13665310	C04A11.5	11.3	86.9	12.7	17.4	3.2	1.5	3.6	3.3	1.9	4.3	5.9	4.7	2.8	11	6.9	0	0	1.8	1.7	5.4	3.3	37	36.9	30	0	0	2.8	37.8	17.4	0.3	7	14.6	3.2	11.2	7.5	3	5	2.2	1.5	0	1.7	6.5	4.7	6.9	2.5
chrII	6848016	6851484	C04A2.1	12.1	20.2	17.8	7.4	6.1	4.1	5.4	8.1	4.3	8.6	5.4	6.6	5.3	12.3	3.7	6	2.9	3.3	4.7	6.1	6	28.9	13.1	7.2	4.3	4.3	4.7	9.6	5.9	5.4	6	10.1	7.7	8.3	9.2	5.7	5	5.3	6.7	4.4	3.2	5.6	5.7	3.3	3
chrII	6835037	6847865	C04A2.3	47.5	46.4	70	44.7	66.5	73.7	68.5	68.7	68.5	71.4	36.5	32.5	34.3	43.5	40.8	101.3	88.9	30.9	72.1	73.9	77.2	57.2	52.9	55.4	100.7	94.8	78.7	48.1	39.6	125.5	133.1	40.1	33.2	29.3	30.4	135.7	113.7	113.8	119.5	115.4	147.7	54.1	60.3	144.4	124
chrII	6853420	6858255	C04A2.7	29.7	22.7	38.2	30.1	112.4	111.5	101.3	116.5	115.8	122.7	32.5	29.4	30.8	32.2	28.4	321.2	283.5	21.6	102.2	92	94.2	52.3	53.6	46.6	328	291.4	91.4	62.6	35.2	190.4	138.9	34.5	27.8	27.9	29.1	128.5	93.9	112.7	120.5	164.6	158.5	28.4	33	110.1	132.2
chrX	12280638	12282491	C04B4.1	0	0	0	0	0	0	0.2	0.1	0	0	0	0.1	0.1	0	0	0	0	0	0	0	0.1	0	0	0	0	0	0.1	0	0	0	0.1	0	0	0	0.1	0	0	0	0	0.1	0	0.2	0	0	0
chrX	12283232	12285246	C04B4.2	0	0	0.1	0.1	36.1	39.9	29.2	37.4	36.2	37.1	0.1	0.1	0	0	0	20.5	17.2	0.1	24.2	15	22.2	0.1	0.8	0.4	20.6	18.5	21.4	0.2	0.1	15.3	16.7	0.2	0	0	0	6.5	4.7	3	5.7	4.2	7.4	0.1	0	2.9	3.1
chrX	12285755	12287185	C04B4.3	0	0	0	0	0	0	0.1	0	0.1	0	0	0.1	0	0	0	0	0	0	0	0	0	3.8	0.6	0.7	0	0	0	4.3	0	0	0	0	0	0	0	0	0	0	0	0	0	0	0	0	0.1
chrX	12289910	12293199	C04B4.4	0	0	0	0	0	0	0	0	0	0	0	0	0	0	0	0	0	0	0	0	0	0	0.1	0	0	0	0	0.2	0	0	0.3	0	0	0	0	0.2	0.2	0.1	0.2	0	0	0	0	0.4	0.4
chrX	12287590	12288286	C04B4.5	0	0	0	0	0	0	0	0	0	0	0	0	0	0	0	0	0	0	0	0	0	0	0	0	0	0	0	0.2	0	0	0	0	0	0	0	0	0	0	0	0.1	0	0	0	0	0
chrX	12274973	12275609	C04B4.6	0	0	0	0	0	0	0	0	0	0	0	0	0	0	0	0	0	0	0	0	0	0	0.2	0.2	0	0	0	0.3	0	0	0	0	0	0	0	0	0	0	0	0	0	0	0	0	0.2
chrX	14020716	14022340	C04C11.1	6.6	13.6	7.9	2.7	2.3	1.6	0.9	1.3	1.9	2.8	1.3	1.3	1	4.8	2.4	0	0	1.4	1.4	3.5	1.8	0.9	0.9	0.8	0	0	0.7	2.4	1.2	1.3	1.9	2.6	3	1.3	2	1.9	3.3	3.8	4.8	0.8	2.3	10.5	3	2.1	2.2
chrX	14033724	14037384	C04C11.2	34.9	34.8	45.2	38.6	17	12.3	17	13.8	17.3	15.1	36.2	36.8	39	54.7	52	26.5	28.1	34.8	12.1	20.6	13.9	19.2	15.4	10.4	30.2	30	12.8	22.6	45.3	100.5	75.9	47.4	53.1	32.3	35.7	84	95.5	113.9	114.6	89.9	161.3	38.7	74.1	93.9	76.6
chrIV	3428896	3430330	C04C3.1	0	0	0	0	0	0	0	0	0	0	0	0.1	0.2	0.1	0	0.2	0.6	0	0	0	0.1	0	0	0	0.5	0.7	0	0	0	0.6	1	0.3	0	0	0	0.3	0.6	0.8	0.6	1.7	0.8	0	0	1.3	1.1
chrIV	3415679	3419231	C04C3.2	0.2	0.1	0.1	0.6	0.4	0.1	0.3	0.3	0.2	0.2	0.8	0.7	0.4	0.6	0.6	0.2	0.6	0.5	0.1	0.2	0.1	0.7	0.9	0.5	0.5	0.2	0.1	1.3	0.5	0.2	0.9	0.2	0.5	0.6	0.3	0.3	0.3	0.5	0.2	0.3	0.3	0.9	0.6	0.6	0.5
chrIV	3399666	3403904	C04C3.3	175.4	102.4	180	196.5	195.7	195.7	191.3	161.8	173.3	155.9	233.8	233.2	247.1	217.7	263	71.3	73	234.8	161.5	146.4	157.3	164.8	158.3	137.5	70.2	68.6	152.6	189.4	262.9	66.3	47.7	178	185.8	181.4	180.5	58.1	61.1	51.5	61.8	51.6	54	141	198.1	50.8	47.6
chrIV	3394362	3394642	C04C3.4	7.2	0	3.6	4.5	23.2	33.6	16.4	22.8	31.1	41.1	13.4	15.9	13.1	4.4	2.6	5.3	0	7.4	19.8	20.6	16	25.9	17.8	16.3	0	0.9	17	23.5	8.3	8.1	3.5	5.1	1.7	10.4	2.5	6.7	5.3	2.1	0	11.4	4.1	0	6.4	10.3	9.1
chrIV	3396577	3399120	C04C3.5	3.3	3.4	4.1	3.8	0.6	1.1	0.7	1.4	1.5	1.4	3.3	3.5	2.9	3.5	2.9	1	2.9	1.5	2.8	2.1	2.9	2.8	3	3.1	0.9	1	2	3.7	1.9	4.1	5.8	1.9	1.6	1.9	2.1	12.6	9.1	8.9	7.6	6	5.9	2.7	1.8	10.7	8.1
chrIV	3419809	3422604	C04C3.6	0	0.7	0.6	0.4	0.1	0.2	0.2	0.1	0	0.1	0.3	0.4	0.6	0.6	0.4	0.2	0	0.2	0	0.1	0	0.3	0	0.1	0	0	0.2	0.2	0.4	0.2	0	0	0	0	0.4	0.3	0	0.1	0.3	0	0.1	0.6	0.3	0.2	0
chrIV	3432771	3433484	C04C3.7	0	0	0	0	0	0.2	0.2	0.3	0.3	0.1	0.1	0	0	0	0	0	0	0	0.5	1.1	0.7	0	0.3	0.1	0	0	0.3	0.4	0	0.1	0	0	0	0	0	0	0	0	0	0	0	0	0	0	0
chrIV	3428084	3428531	C04C3.9	0	2.5	0	0	0.6	0	0	0	0	0.6	0	0	0	1	0.7	0	0	0	0	0.6	0	5.7	4.3	3	0	0	0	4.4	0	0	0	0	0	0	0	0	0	0	0	0	0	1.5	0	0	0
chrIII	8494940	8518803	C04D8.1	31.4	20.7	37.1	30.4	25.1	26.3	23.7	27.9	26	28.1	27	24.7	23	33.1	28.6	40.3	35.1	21.4	22.6	21.4	21.5	19.8	21.5	17.2	41.8	36.1	20.9	27.1	28.8	43.4	44.3	24.9	22.7	23.5	21.8	50.7	48.1	57	69.5	44.6	54.4	40.5	34.2	57.9	48.9
chrV	3377532	3381921	C04E12.10	0.1	0.4	0.5	0	0	0	0	0	0	0	0.1	0.1	0.1	0	0.2	0	0	0	0	0	0.1	0	0	0	0	0	0	0	0.1	0	0	0.3	0.2	0.1	0	0	0	0	0	0	0	0.1	0.1	0	0
chrV	3386487	3388153	C04E12.11	0	2.4	2.8	1.1	0.8	0.6	0.4	0.9	0.3	0.3	0.5	0.6	1.2	2.6	1.7	0	0	1.1	0.6	0.5	0.5	3.1	0.3	1.6	0	0	0.4	2	1.1	0.1	0.2	0	0.8	1.6	1.2	0	0	0.2	0.3	0.2	0.1	1.7	1.2	0.3	0.1
chrV	3389326	3390949	C04E12.12	1.2	2.8	1.7	1.7	0.8	0.6	0.5	0.3	0.5	0.6	1.9	2.8	1.6	1.4	1.7	0.4	0.6	1.5	0.4	0.7	0.9	3.8	1	1.2	0.4	0.3	0.8	2.3	1.1	0.3	0.7	3.1	1.2	1.7	1.4	0.7	0.2	0.2	0.1	0.3	0.2	3.6	2.1	1	0.6
chrV	3368069	3369874	C04E12.2	8.3	12.6	14.4	11.5	8.3	8.4	10.5	3.8	4.2	3	10.7	13.7	13.4	13.7	13.5	0	0	6	6.2	5.3	4.4	13.3	5.5	5.5	0	0	7	11.5	15.6	0.3	0.2	10	11	29.8	29.9	0	0	0.1	0	0	0	11.3	7.9	0.2	0.1
chrV	3362780	3368318	C04E12.4	9.7	16.8	12.4	6.1	5.3	3.9	4.2	2.6	3.1	3.3	5.4	4.8	8.5	23.9	16	0	0	3.6	2.6	3.6	3.2	3	3.1	3	0	0	3.3	5.5	10.1	0	0.3	13.4	11.5	11.7	18.1	0	0	0.1	0.1	0	0.1	6.1	13.2	0.1	0.3
chrV	3358595	3361090	C04E12.5	0.5	1	1.1	0.4	1.1	0.5	0.4	0.1	0.1	0.1	1.4	1.2	1.7	2.1	2.2	0	0.2	0.4	0.2	0.3	0.2	0.1	0.1	0.3	0	0	0.2	0.2	1.6	0	0.1	1.5	1.3	1.4	2.6	0.2	0	0	0	0.1	0.1	0.8	2.4	0	0.1
chrV	3354665	3355510	C04E12.6	0	0	0.3	0.7	0.2	0.1	0.2	0	0.1	0.1	0.2	0	0.2	0.4	0.3	0	0	0.3	0	0	0.3	0	0	0.1	0	0	0	0	0	0.1	0	0	0	0.6	0.4	0	0	0	0	0	0	0.4	0	0.1	0
chrV	3355976	3357190	C04E12.7	1.1	3.1	1.6	3.4	0.7	0.8	0.4	0.5	0.5	0.5	2.3	3.4	2.4	2.3	2.1	1.8	1.4	2.7	0.7	0.6	0.3	0.8	0.4	0.6	1.8	1.5	0.4	1.3	1.7	0.3	1.3	1.1	2	4.2	3	1.4	2	0.7	0.2	1.6	0.9	3	1.9	2.2	1.2
chrV	3370938	3372770	C04E12.8	0	0	0	0	0	0	0	0	0	0	0.1	0	0	0	0	0	0	0	0	0	0	0	0	0	0	0	0	0	0	0	0	0	0	0	0	0	0	0	0	0	0.1	0	0	0.1	0.1
chrV	3374358	3377073	C04E12.9	0	0	0	0.3	0	0	0	0	0	0	0	0	0	0	0	0	0	0	0	0	0	0	0	0	0	0	0	0	0	0	0	0	0	0	0.1	0	0	0	0	0	0	0.1	0	0	0.1
chrV	5904899	5906335	C04E6.10	0	0.1	0	0	0	0.1	0	0.1	0	0.1	0	0.1	0	0	0	0	0	0.1	0	0	0	0	0	0.2	0	0	0	0.1	0	0	0	0.6	0.1	0	0.1	0	0	0.3	0.1	0	0	0	0	0	0
chrV	5914077	5917831	C04E6.11	9.4	3.6	11	5.6	13.9	15.3	12.5	13.9	13.6	14.8	8.8	9.9	8.2	6	7.4	4.6	4.2	6.9	11.3	10.1	11.1	4.4	4.7	4.5	5.2	4.5	9.5	6.6	5.7	6.1	4.6	5.6	7.1	6.9	6.3	6	4.2	6.5	6.1	5.8	5.7	5.2	9.4	5.1	5.1
chrV	5912739	5913740	C04E6.13	15.7	44.7	13.9	40.7	11.8	4	7.9	7.1	4.7	8.8	19.6	20.4	17.6	41.5	32.5	0	2	25.8	9.4	12.8	9.1	37	43.5	45.4	0.4	1.1	8.5	29.9	42.3	1.1	9.2	26.7	36.2	30.8	45.2	2	6.9	6.4	13	0.6	2.3	25.7	25.8	10.2	3.5
chrV	5922527	5924280	C04E6.2	0	0.1	0.2	0	0.1	0.1	0.1	0	0.1	0.2	0	0.2	0.1	0.2	0.4	0	0	0	0.1	0.1	0	0	0.1	0	0	0	0	0	0.3	0	0.5	0.4	0	0.4	0.3	0.1	0.1	0	0	0.2	0	0.2	0.6	0.3	0.2
chrV	5920103	5920378	C04E6.3	0	0	0	0	0	0	0	0	0	0	0	0	0	0	0	0	0	0	0	0	0	0	0	0	0	0	0	0	0	0	0	0	0	0	0	0	0	0	0	0	0	0	0	0	0
chrV	5907390	5909603	C04E6.4	0	0	0	0	0.5	0.1	0.7	0.5	0.1	0.4	0.1	0.1	0	0	0	0	0	0	0.1	0.6	0.4	8.1	9.1	9.1	0	0	0.1	8.5	0	0	0	0	0	0	0	0	0	0	0	0	0	0	0	0	0.1
chrV	5902115	5904829	C04E6.5	0	0	0	0	1.4	0.4	2	1.3	0.5	0.7	0	0	0	0	0	0.3	0	0.2	0.6	1.7	0.8	26.5	22	23.3	0	0	0.5	28.9	0.2	0	0.1	0.2	0	0	0.1	0	0	0	0	0	0	0	0.1	0	0.1
chrV	5895370	5898585	C04E6.6	0.3	0.1	0.6	0.3	0.1	0	0.2	0	0	0	0.4	0.1	0.2	0.3	0.2	0	0	0.2	0.1	0.1	0	0.1	0.1	0	0	0	0	0.2	0.3	0	0	0.3	0.4	0.1	0.2	0	0	0	0	0	0	1.1	0.2	0	0
chrV	5893299	5895196	C04E6.7	12.2	6.6	12.6	10.4	4.1	3.5	4.4	3.4	4.1	4.2	7.8	6.5	3	10.5	9.4	0	0	5.4	3.1	4.3	3.2	6.9	6.8	5.2	0.3	0.2	3.3	7.7	6.8	0.7	3.4	7.5	6	5.6	5.9	1.4	4.4	1.9	4.1	1	0.9	7.3	4.5	2.3	2
chrV	5882647	5883820	C04E6.8	1	0.5	1.2	5.1	1.2	0.9	1.2	2.4	1.9	1.8	2.3	8.3	6.5	7.5	3.7	0	0	3.6	2.4	3.1	2.3	4.6	7.5	4.1	0	0	2.1	5.5	3.3	0	0.5	8.2	6.8	9	8.1	0	0	0.2	0.5	0	0.5	2.4	6.3	0.2	0.5
chrV	5898510	5900023	C04E6.9	0	0	0	0	0	0	0	0	0.1	0	0	0	0	0	0	0	0	0	0	0	0	0.3	0	0	0	0	0	0.1	0	0.1	0.1	0	0	0.1	0	0	0	0	0	0	0	0	0	0	0
chrX	358091	360198	C04E7.1	0	0	0.1	0	0	0	0	0.1	0	0.1	0.1	0.1	0	0	0.2	0.3	0	0	0	0.1	0	0.5	0.2	0.3	0.1	0.2	0	0.4	0.2	0.3	0.1	0	0.2	0	0	0	0.2	0	0	0.1	0.1	0	0.1	0.1	0
chrX	353619	357934	C04E7.2	9.7	5.2	8.8	7.6	7.1	6.9	5.8	6.2	6.8	6.9	5.8	6.4	6.3	9.7	9.3	48.2	44.5	6.1	4.1	4	5.9	2.5	2.7	2.1	42.1	41.5	5.1	4.3	5.7	36.6	28.3	7.6	7.3	8.3	9.2	27.1	22.3	29.3	30.1	39.3	35.5	11.5	10.6	30.9	29.9
chrX	344126	346289	C04E7.3	4.6	7.2	7.3	3.6	1.4	0.7	1.7	1.5	1.1	1.6	3.2	3.1	3.5	5.2	4.1	1.9	1.9	3.1	1.5	1.8	1.2	2.9	2.8	2.7	2.6	2.8	1.2	3.6	3.9	4.3	5.6	6.5	3	3.2	3.5	4.4	3.8	7.5	5.6	3.2	6	4.4	3.9	8.1	6.5
chrX	334309	341232	C04E7.4	2.2	3.6	3.7	1.9	0.9	0.7	1	0.9	0.7	0.8	2	1.7	2.6	2.8	2.3	1.3	1.6	1	0.5	0.9	0.7	1.5	1.4	1.2	1.2	1.1	0.8	1.9	2.5	2.6	4	2.4	1.3	1.8	1.6	2.4	3.2	3.7	3.4	1.6	3.6	2.2	2.1	4.3	3.4
chrX	360778	362966	C04E7.5	0.4	0	0	0.3	3.5	1.2	2.8	2	1	1.1	0	0	0.3	0	0	0	0.8	0	1	0.6	0.6	0	0	0	0	0	1.9	0	0	0.2	0.2	0	0	0	0	0	0	0	0	0.4	0.1	0	0	0	0.8
chrI	5726375	5729310	C04F1.1	15.6	3	10.5	5.3	0.3	0.2	0.4	0.6	0.1	0.6	5.6	3.7	0.6	1.2	0.4	0	0	0.1	0	0.1	0.2	0.6	0.1	0.6	0	0	0	0.5	5.5	0	0	4.9	3.3	2.9	2.4	0	0	0.1	0.2	0	0	9.3	1.2	0	0
chrI	5716678	5725359	C04F1.3	9.9	9.5	12.5	8.3	4.9	3.2	4.9	4	4.2	4.5	5.5	4	3.7	8.9	6.9	6.7	9.6	5.8	3.2	5	4.4	1.5	1.6	1.1	8.6	9	4.3	3	6.8	25.8	39.6	5.8	7.9	5.7	6	49.9	51.7	51.3	55.6	42.2	40.9	8.2	9.2	56.1	38.3
chrI	9673657	9678544	C04F12.1	4.6	5.7	7	7.7	18.5	15.6	15.4	19.9	21.1	24.5	7.1	7	5.7	10.1	9.9	22.3	17.6	3	16.2	14.4	15.8	10.7	10.5	9.7	20.6	18.2	15.3	16.7	8.7	8.8	25.7	6.6	7.8	9.5	8.4	10.7	5.1	6.7	8.5	9.4	9.4	8.7	7.9	18.4	15.8
chrI	9711057	9712757	C04F12.10	45.6	35	59.2	43.7	53.6	43.7	42.4	50.7	41.6	51.3	53.4	56	39.3	38.6	38.8	14.2	16.7	21.3	32.3	34.1	31.5	47.7	44.8	45	15.4	17.4	31.4	60.9	49.3	41.3	49.7	45.1	47.3	46.1	49.6	38.8	40.2	62.1	49.4	42.3	47.3	43.2	36.8	47.1	39.8
chrI	9694612	9695203	C04F12.12	0	0	0	0	3.9	1.4	4.7	4.7	3.6	3.3	0.6	0	0	0	0	0	0	0	3.9	7.8	3.9	86.5	75.9	94.8	0.2	0	1.8	102.6	0	0	0.2	0	0	0	0	0.5	0.4	0	0.4	0	0.2	0	0	0	0.2
chrI	9685472	9688639	C04F12.3	11.4	9.1	13.7	14.7	5.2	1.8	4.3	4	2.6	4.1	14.6	15.2	11.2	14.3	9.6	0	0	8.1	2.1	4.3	2.8	5.4	6.3	3.4	0.2	0.1	2.4	5.9	16.8	10.6	20.7	12.2	8.5	10.7	10.5	20.1	17.9	26.1	22.1	13.4	17.3	8.2	5	25.5	16.8
chrI	9689175	9690118	C04F12.4	2657.5	4016.2	2591.3	4841.5	3194.3	3637.8	3534.1	4350.8	3318.1	4686	5641.4	4930.3	4816.6	4143.3	5027.9	526.6	718.6	4595.8	3063.1	3229	3204.1	2912.2	2552.8	2693	530.1	650.3	2916.4	2386.4	4480.5	1010.2	1349.4	6071.3	6975.9	6664.6	6339.7	2410.6	3551.6	1773.8	1640.8	578.1	1242.2	3601.7	4545.9	1624.8	1425.2
chrI	9690088	9690548	C04F12.5	13.8	26.3	20.7	32.1	53.5	58.6	54	80.1	71.8	70.6	29.8	25.2	33.5	47	32.7	76.5	81.5	17.6	52.2	49.4	56	50.8	48.5	48.5	83	77	49.2	61.7	35.6	40.8	49.7	43.3	30.3	28.7	33.9	59.2	44.1	35.2	39.8	44	36.6	23	23.8	36.2	42.9
chrI	9692650	9693772	C04F12.6	0	0	0	0	3.7	0.5	5.1	1.6	1.4	1.8	0	0	0	0	0	0	0	0	1.6	3.5	2.7	45.6	45.9	48.9	0.1	0.1	1.1	39.8	0.1	0	0	0	0.1	0	0	0.1	0	0.1	0.1	0	0.1	0	0	0	0.4
chrI	9695698	9696753	C04F12.7	1.3	0.6	0.2	0.9	96.7	29	100.4	55.9	43.3	51.2	1.2	2.4	1.2	0.7	0.5	0.8	0.3	0.6	37.9	72.4	45.6	427.6	363.1	419.2	0.7	0.4	34	580.8	0.2	0.4	0.6	0	0.2	1.4	0.4	0.3	1.2	0.4	0.6	0.4	0.3	0.4	0.3	0.7	0.7
chrI	9697584	9699546	C04F12.8	15.2	17.4	17.7	11.7	10.6	5.7	19.1	7.5	6.7	7.2	6.9	6.7	6.9	18.7	12	1.6	1.3	8.9	7.1	13.8	9.5	19.2	21.3	21.5	1.5	1.9	8.8	26.7	6.7	5.8	12.3	12.3	7.6	14.3	12.7	6.2	13	12.9	23.5	6.2	8.3	20.1	21.4	14.8	9.6
chrI	9710078	9710758	C04F12.9	1.5	1.2	1.5	2.7	27.3	16.7	23.4	20.5	17.9	20.4	8.5	5.5	5.2	4.1	4.9	0	0.8	6.3	16	24	16.5	12.6	14.9	8.5	1.3	2.1	16.2	15.2	3.8	4.7	12.9	3.7	5.7	4.5	6.7	6.8	9.9	4.8	3.1	14	2.6	1.9	2.4	3.1	4.4
chrV	7497720	7499036	C04F2.1	0.1	0.2	0.1	0.1	0	0.1	0	0	0	0	0	0	0	0	0.1	0	0	0	0	0	0	0	0.1	0	0.1	0	0	0.1	0	0.1	0.1	0.3	0.2	0	0.1	0	0	0	0	0	0	0	0	0.1	0.2
chrV	7501716	7504352	C04F2.4	0.2	0	0	0.2	0	0	0	0	0	0	0.1	0.1	0.1	0.1	0.1	0	0	0	0	0	0	0.1	0	0	0	0	0	0	0.2	0	0.1	0	0.1	0	0.1	0.1	0	0	0	0	0	0.2	0.1	0	0
chrV	5119954	5126901	C04F5.1	9.9	4.2	9.5	4.3	17.1	15.7	15.9	20.5	20.3	19.7	6.5	7.2	5.8	4.1	4.8	17	14.1	3	14.7	12.6	15.5	6.2	5.8	5.6	16.2	14.2	14.4	8.5	7.2	13.6	11.9	6.2	5.6	6	6.1	9.9	5.3	7.1	9.2	11.4	8.7	4.9	4.5	6	8.9
chrV	5093699	5096262	C04F5.2	0	0	0	0	0	0	0	0	0	0.1	0.2	0.3	0	0	0.1	0	0	0	0	0	0	0	0	0	0	0	0	0	1.1	0	0.2	0	0	0	0	0.3	0	0	0	0	0	0	0	0	0.2
chrV	5094768	5098892	C04F5.3	2.5	2.3	1.9	2.1	0.2	0.2	0.4	0.3	0.3	0.2	1.2	1	1.3	3.4	2.1	0	0	1.2	0.2	0.3	0.1	1.3	0.5	0.4	0	0	0.2	0.8	2	0.3	0.9	2	1.7	1.8	2.1	1.4	2	1.5	2.8	0.3	0.6	1.7	2.7	2.1	0.8
chrV	5100064	5102102	C04F5.4	0	0	0	0	0	0.1	0	0	0	0	0.1	0.1	0	0.1	0	0	0	0.1	0	0	0.1	0	0	0	0	0	0	0	0	0.1	0.1	0	0.4	0	0.1	0	0	0	0	0	0	0	0.2	0	0
chrV	5103026	5105019	C04F5.5	0	0.2	0	0	0.1	0	0	0	0	0	0	0	0	0.4	0.2	0	0	0	0	0	0	0	0	0	0.1	0	0.1	0	0.1	0	0	0	0	0.1	0.1	0	0	0	0.3	0	0	0	0.1	0	0
chrV	5105748	5107901	C04F5.6	0	0	0	0.2	0.1	0.1	0.1	0	0	0.1	0.1	0.1	0.1	0.2	0.1	0	0	0.1	0	0	0	0.3	0.1	0.2	0	0.1	0	0.2	0.4	0	0.2	0	0.1	0.1	0	0	0	0.1	0	0	0	0.1	0.1	0	0
chrV	5107999	5110774	C04F5.7	2.8	1.6	1.4	3.3	9.7	6.6	2.8	5.7	5.5	5	3.1	2.2	1.8	6	3.9	1.3	0.3	4.5	4.5	2.9	8.6	6.9	7.2	15.6	0.6	0.6	7.8	11.3	0.1	0.4	1	1	2.7	0.3	0.8	1.3	0.9	0.8	0.2	4.3	0.8	4.6	18	0.8	0.6
chrV	5111481	5113741	C04F5.8	27.9	22.2	33.6	20.9	53.4	54.1	56.3	57.5	58.1	61	36.3	33.6	34.7	28.7	29.5	76.5	80.7	24.9	41.9	38.9	42.2	28.6	23.4	23.2	81.9	88.4	42.4	36.7	23.6	46.2	32.8	25.7	27.2	31.5	29.4	47.3	32.8	35.4	34	45.9	49.7	29.5	32.1	30.4	29.8
chrV	5114729	5119194	C04F5.9	6.3	4.2	9.5	3.7	13.5	15.1	11.9	14.3	13.8	14.4	4.9	3.9	4.4	4.4	3.7	7.4	10.2	2.6	9.9	8.1	11.8	6.2	6.5	5.8	9.5	9.1	11.6	7.5	4.5	9.6	9.6	5.3	3.5	3.5	3.5	7.1	6.3	7.5	7.8	10.4	9	3.2	3.6	9.6	9.3
chrX	3403456	3408591	C04F6.1	0.1	0	0	2.4	2129.4	3146.4	1904.8	2637.1	2573.7	2699.3	0.1	0.1	0.1	0	0	0.9	1.2	0.6	3317	1564.5	3665.7	6.3	63.2	39.9	1.1	1.1	3891	19.6	2.6	2.7	3.1	0.2	0	0.1	0	0.1	14.3	9.8	0.1	2.9	0.1	1.4	0.1	0.1	4.1
chrX	3397137	3397454	C04F6.2	25.2	13.4	19.8	45.3	11.9	5.1	11.6	4.8	0.7	7.2	25.2	26.2	11.1	19.2	16.8	0	0	17.7	3.3	10.5	1.4	20.8	13.9	10.9	0	0.7	11.8	21.9	17.1	9.1	15	21.1	18.6	34.3	16.7	22.2	23.1	32.2	35.3	8.1	14.1	20.8	24.5	10.9	12.2
chrX	3397593	3400007	C04F6.3	3.6	2.2	2.1	13.9	5.9	14.3	3.5	21.9	13.2	23.9	5.9	5.8	1.9	6.6	2.2	845.5	1033	3.7	4.5	2.3	3.6	1.5	0.6	0.4	838.1	989	3.5	1.9	11.6	814	577.2	9.2	8.5	7.4	4.9	913.2	495.6	392.4	327.5	1727.9	551.8	7.3	4	407.9	578.4
chrX	3408649	3411669	C04F6.4	24.6	14.4	29.5	31.2	16.9	14.9	15.5	14.7	14.3	16.9	39.6	39.2	32.8	23.9	27.3	27.1	21.2	26.9	11.1	14.7	13.6	13.5	19.3	16.9	28.3	24.1	11.8	16.4	34.5	30.1	39.9	32.2	39.5	40	37.4	40.3	34.9	43.5	35.3	34.9	30.9	25.7	27.1	37.4	32.6
chrX	3412869	3414693	C04F6.5	5.1	11.9	15.4	12.1	5.3	3.8	3	3.8	4.5	5.3	15.4	13.9	23.1	19.3	26.4	5.2	6.1	9.7	2.7	3	3.3	1	2.9	2.7	7.3	6	3.1	3.6	20.8	46.5	59.2	21.9	25.9	24.2	32.9	49.1	48.4	62.5	49.9	53.1	51.7	17.2	21.2	57.9	51.6
chrX	3416874	3419200	C04F6.7	0.2	0	0	0.3	0.1	0.1	0	0	0	0.1	0.2	0.1	0.1	0.1	0.1	0	0	0	0	0.1	0	0	0.2	0	0	0	0	0.1	0.1	0	0	0.2	0.2	0	0.1	0.1	0.1	0.2	0	0	0.1	0.2	0.1	0	0
chrIV	10088345	10089868	C04G2.1	5.1	4.5	7.7	6.4	3.6	3.7	4.1	2.6	2.5	2.8	6.3	6.2	3.9	7.5	5.9	0	0	3.7	1.6	2.2	1.9	5.3	4.4	4.9	0	0	1.7	5	8.5	0.2	1.8	8.4	6.3	6.9	8.2	0.2	0.4	0.1	2	0.1	0	6.7	3.9	1.7	1.2
chrIV	10115368	10118062	C04G2.10	0	0.1	0.4	0	6.3	5.1	7.9	7.2	7.6	10	0.7	0.8	0.4	0.1	0.1	0	0	0	6	9.8	6.9	9.1	8.8	12.1	0	0	6	10.1	0	0.3	0.3	0.8	0.1	0.2	0.1	0.3	0.4	0.3	0.5	0.2	0.4	0.2	0.1	0.6	0.7
chrIV	10119437	10122367	C04G2.11	0	0	0	0	0	0	0.1	0	0	0	0	0	0	0	0	0	0	0	0	0.1	0	0	0	0	0.1	0.1	0	0.1	0	0.1	0	0	0.1	0.1	0	0	0	0.1	0.1	0	0	0	0.1	0.1	0
chrIV	10090712	10092358	C04G2.2	0	0	0.1	0	4.8	1	5	3.3	2.3	3.7	0	0.1	0	0	0.1	0	0.5	0.2	1.2	4.1	2.3	58.1	57.4	58.3	0.1	0.2	2.2	59	0	0.1	0.1	0	0.2	0.1	0	0.3	0	0.1	0.3	0.1	0.2	0	0	0.2	0.2
chrIV	10095378	10095830	C04G2.4	0	0	0	1.5	211.9	78.9	236.5	128	93.2	156	0	0.7	0	0	0.3	6.2	3.6	4	146.1	297.6	179.7	2208.1	2378.4	3180.1	3.3	1.9	144.6	2405.6	1.3	1.3	2.1	0	0	1.1	0	0.3	0.1	0.1	0	0.5	0.3	3.5	0	0.1	0.5
chrIV	10094178	10095204	C04G2.5	0	0	0	0.2	6.1	1.3	6.3	3.8	1.8	3	0.2	0	0	0	0	0	0	0	2.3	5.5	2.3	60.5	57.2	60.3	0.8	0.3	3.1	64.1	0	0	0.2	0	0	0	0	0	0.2	0.2	0	0.5	0	0	0	0.1	0
chrIV	10097186	10106535	C04G2.6	18.6	10.2	22.6	11.8	25.8	25.4	22	27.2	26.2	29.5	19.5	21.6	17.3	17	13.2	41.1	36.6	12.8	18.5	15.7	19.6	9.8	9.6	9.1	37.8	34.6	18.4	13.6	10.8	30.4	26.9	10.9	16.7	17.8	13	23.3	16.9	22.8	22.1	22.6	28.6	13.9	22.7	23.5	22.1
chrIV	10107013	10110391	C04G2.7	13.2	14	14.8	9.2	1	0.4	1.5	0.8	0.3	0.9	6.5	4.7	4.7	8.4	6.9	1.4	0.4	5.6	1	2.5	0.6	2.3	2.5	2.1	0.4	0.3	0.5	3.7	5.5	11.5	17.4	8.8	5.4	4.3	4.2	25.8	29.8	29.6	31.3	22.1	21	13.5	5.3	30.1	19.7
chrIV	10110325	10111556	C04G2.8	0	0	0	0.3	72.7	26.5	96.8	82.3	61.5	72.6	0.2	0.2	0	0	0.4	2	2.6	0.1	76.1	174.1	86.5	2306.4	1739.4	2004.1	2.4	1.5	77.5	1661.2	0	0.3	0.3	0	0	0.7	0	0.3	0	0.1	0	0.2	0.1	1.2	0.1	0.1	0.1
chrIV	10112868	10114209	C04G2.9	0	0	0	0.2	69.8	25.4	89.6	43.5	32.6	44.4	0.1	0	0	0	0	1.2	0.5	0.1	46.6	91.3	52	950.3	936.2	1209.7	1.7	0.8	44	866.9	0	0	0	0	0	0.5	0	0.1	0	0	0	0	0.1	0.3	0	0	0.2
chrII	5104108	5108892	C04G6.1	9.2	9.7	9.5	6.1	3.8	2.1	2.8	3.4	1.9	4.2	9	7	6.4	6.7	6.1	0	0.5	6	1.9	2.9	1.8	2.7	3	3.4	0.1	0	1.4	5.7	6	1.1	4.1	7.7	6.6	7.6	7.5	2	3.4	5.7	6.4	0.6	1.8	8.2	6.1	4.1	2.1
chrII	5101975	5102638	C04G6.10	9.7	0.6	5.4	4.9	0.7	0	1.5	0.8	0.6	1.5	4.5	4.3	1.3	1.8	0.8	0	0	4.3	0.3	2.4	0.3	0.4	0	0	0.1	0.1	0.2	0	4.3	1.8	2.6	3.5	3.8	5.5	2.4	2.2	10	5.6	6	0.8	2.2	5	5	4.1	1.7
chrII	5103331	5103825	C04G6.11	0	0	0	0	0	0	0	0	0	0	0	0	0	0	0	0	0	0	0	0	0	0	0	0	0	0	0	0	0	0	0	0	0	0	0	0	0	0	0	0	0	0	0	0	0
chrII	5094236	5095362	C04G6.13	0.8	0.1	0	0.3	0	0	0	0	0.1	0.1	0.3	0.1	0.1	0.1	0	0	0	0.1	0	0	0.2	0	0	0.1	0	0	0	0	0.2	0	0	0	0	0.1	0	0	0.2	0	0	0	0	0	0.4	0	0
chrII	5093227	5094206	C04G6.2	12.2	2.3	8.5	18.5	5.7	0.6	5.2	5.7	1.6	7.5	15.5	15.9	0.9	1.6	1.2	0	0	11	2.5	7	0.7	0	1.4	0.5	0.1	0.1	1.1	0	7.3	1.3	3	4.2	7.6	16.2	5.9	1	0	0.7	4.1	0.4	1.4	28.5	3.8	3.2	2.2
chrII	5083839	5091628	C04G6.3	26.3	27	36.6	20.6	28.5	25.4	27.6	29.8	28.3	31.4	24.9	24.9	24.8	25	23	12.8	11.1	14.8	22	21.6	23.1	26.9	26.6	25.2	12.5	11	20.9	35.7	22.9	19.8	36	27.2	22.7	21.9	23.4	24.4	22.7	30.5	29.1	22	22.3	27.5	21.5	33.9	28.6
chrII	5081486	5083433	C04G6.4	14.1	13.7	17.1	17	22.4	23.8	23	24.6	22.9	27.3	18.2	19.8	15	15.6	18.1	14	14.4	11.7	22.2	21.6	23.5	19.8	18.4	15.2	15.7	14.3	22.4	19.1	21.3	22.7	26.4	19.7	20	17.5	18	26.1	23	33.4	29.7	23.8	24.3	19.1	11.7	22.2	20.9
chrII	5085776	5086113	C04G6.5	19.9	19.5	11.5	7.4	2.6	3.3	4.3	5	0.6	5	9.3	7.5	3.8	7.7	5.2	0	0	0.6	1.1	1.1	1.8	4.7	9.8	6.9	0	0	1.8	12.7	19.1	9	17.9	0	14.7	28.6	25.1	12.7	16.1	14.2	34.9	4.5	7.1	6	1.4	18.8	14.5
chrII	5099428	5100233	C04G6.6	1.3	0.7	1.4	1.1	4.9	4.4	3.3	6.8	8.8	8.1	2.3	4	3.4	0.9	1.3	0	0	1.3	13.7	12.9	12.7	11	10.1	12.9	0.1	0.2	15.6	6.8	0.2	0.2	0.9	3.1	0.6	0.3	0.8	0.5	0.8	0.1	0.5	0.3	0.4	0.3	0.5	0.8	0.1
chrII	5100402	5101774	C04G6.7	7.2	0.6	2.4	3.7	1.2	0	1.3	1.7	0.1	1.4	4.8	3.4	1.6	2.3	0.8	0	0	4.7	0.5	1.6	0.2	0.3	0.1	0	0.1	0.1	0.3	0.1	2.5	1.3	2.7	0.7	4.5	6.9	3.2	3.6	10.9	4.8	10.2	0.8	2	5.1	5.5	3.9	2.7
chrII	7958792	7960186	C04H4.1	5.6	10.9	0	3.8	0	0.7	0	0	0	1.5	2.5	2.6	1.1	2.5	6.2	0	0	1.4	0	0.7	0.7	0	3.4	0	0	0	0	4.7	1.8	0.7	2.6	0	1.5	5.2	1.1	0	3	0.9	0	0.6	0	10.8	3.4	2.7	0
chrII	14534222	14535820	C04H5.1	9	9.5	13.1	17.6	25.8	31.5	28.2	31.7	32.5	33.5	24.9	24.8	27.2	21.5	21.6	27.6	25.4	23.9	27.7	32	30.1	18	14.5	16.8	25	23.4	27.2	21.6	22.2	43	29.5	18.7	28.4	32	28.2	23.5	26.1	25.6	26.7	35.5	45.5	32.4	36.1	31.2	30.6
chrII	14535743	14537504	C04H5.2	0	0.1	0	0.1	8.3	8.2	6.9	7.7	7.8	6.2	0	0	0	0.1	0.1	0	0	0	6.9	8.1	8.6	71.3	64.3	43.7	0	0	8.1	58.2	0.2	0.1	0.5	1.2	0	0.1	0	0	0.1	0.2	0.2	0	0.2	0	0	0.5	0.2
chrII	14540743	14548716	C04H5.3	0.6	0.8	0.6	0.5	0.2	0.1	0.2	0.1	0.2	0.3	0.9	0.8	0.3	1.1	0.6	0.1	0	0.5	0.2	0.4	0.2	0.4	0.3	0.3	0.1	0.1	0.1	1.1	0.3	0.1	0.1	0.3	0.4	0	0.3	0.6	0.3	0.5	0.6	0.2	0.2	0.2	0.1	0.3	0.3
chrII	14552429	14561521	C04H5.6	17.7	7.5	17.5	12.6	24.1	26.1	23.8	29.2	26.9	28.4	16.8	16.6	13.7	11.5	13.7	59	47.8	13.8	22.1	19.2	22.7	14.3	13.2	12.2	57.3	53.2	21.7	15.4	10.4	37.5	32.3	12.2	12.9	13.8	12.2	25.8	18.7	21.3	19.6	35.2	30.4	12	14.3	28.2	30.6
chrII	14537870	14539087	C04H5.7	0	0	0	0	9	9	7.9	13.4	8.3	15	0	0	0	0	0	0	0	0	6.3	5.5	8.1	2.2	1.1	1.1	0	0	7.5	2.3	0	0	0.1	0	0	0	0	0	0	0	0	0	0	0.2	0	0	0
chrII	14550837	14552410	C04H5.8	50.6	171.6	36.2	77.8	18.8	8.2	20.3	12.9	8.8	16.9	50.7	40.2	33.7	125.1	67.4	0	3.4	48.5	5.2	10.8	10.7	60.4	44.3	45.4	4.4	4.3	5	84.2	86.3	7.1	10.3	42.7	63.2	54.2	46.2	9.1	15.3	18.8	17.9	3.5	8.7	55.9	48.7	11.8	13.4
chrV	10702528	10704889	C05A2.1	13.7	10.5	18.4	13.4	10.1	5.6	11.5	7.5	6.9	8.1	10.2	8.8	10	16.5	11.1	2	1	6.4	5.8	10.2	5	13.5	10.2	8.3	2.2	1.9	5.4	14.7	11.2	1.7	6.9	10.4	7.4	8.3	9.6	2.4	5.6	6.3	8.4	1.4	3.3	13	11.5	6.5	4.5
chrX	10854254	10859228	C05A9.1	6.4	7.5	38.6	1.4	1.1	1	1.6	0.9	1.1	1	4.2	4.7	20.9	2.5	3.8	0	0	1.4	0.7	1.4	1.1	2.6	0.4	0.4	0	0	1.3	0.5	1.8	0.2	1.9	3.1	1.7	3.7	5.6	0.4	0.5	0.9	1.2	0.2	0.6	3	11.8	2	1.7
chrX	10842616	10844609	C05A9.2	44.2	26.4	56.9	32	5.6	2.7	5.3	5.8	4.7	5.1	36.4	30.7	42.4	38.1	33.3	10.7	17.1	17.7	4	8.3	3.6	7.6	8.6	5.9	14.7	17	3	14.7	35.3	95.9	83.6	31.3	30.3	38.9	42.2	87.4	113.8	140.6	127.3	135.3	128.5	48.9	38.7	132.1	101.4
chrIV	6842952	6844955	C05B10.1	7.9	13.2	9.1	12.9	37.6	34.5	33.1	33.3	32.3	37.9	12.5	10.7	11.7	12.8	11.9	2.5	2.7	10.5	25.2	22.5	26.3	10.5	8.4	7.6	2.1	2.3	22.9	13.5	14.1	7.8	13.8	13.4	12.1	11.9	11.5	12.1	16.9	21.3	24.7	6.9	11.4	15.4	17.1	18.5	11.9
chrIII	9987651	9988371	C05B5.1	0	0.2	0	0	0.2	0.6	0.2	0.2	0	0.2	0	0	0	0	0	0	0	0	0.2	0.2	0	7.6	4.7	6.1	0.2	0	0.2	13.5	0	0.2	0	0	0	0	0	0	0	0	0	0	0	0	0	0.4	0
chrIII	10004375	10004875	C05B5.11	0	0	0	0.3	0	0.4	0.2	1.6	0.2	0.2	0	0	0	0	0	0.8	4.1	0	0.6	0.5	3.8	1227.6	1284.4	1726.9	0	1.2	1.8	1355.2	0	1.2	0	0	0	0	0	1	0.4	0.5	0.5	1.1	0.8	0.5	0.5	2.9	1.3
chrIII	9987289	9987639	C05B5.12	0	0	0.6	0	1.5	0	1.1	1.3	1	1	0	0	0	0.4	0	0	0	0	2.2	1.3	0.9	13.1	19.5	20.6	0	0	0	15.6	0	0	1.7	0	0	0	0	0	0	0	0	0.4	0	0	0	0.4	0
chrIII	9998452	10000427	C05B5.2	0	0.1	0	0	25.7	6.4	28.7	14.7	10	12.7	0.2	0.3	0	0	0.1	0	0	0	8.5	17.6	12.4	112.3	99.6	118.6	0.1	0	9.4	156.5	0.4	0	0.1	0	0.1	0	0.1	0.1	0	0.1	0	0	0.1	0.1	0	0.3	0.1
chrIII	9996121	9997831	C05B5.3	4.4	1.1	2.6	3.1	5.8	3.4	5.7	3	2.4	3.2	3.8	3.3	2	4.5	3.7	0	0.5	0.9	2	3.1	2.7	2.7	1.9	1.3	0	0	2	3.3	4.8	1.3	7.9	4.7	3.7	3.4	4.3	5.4	4.4	8	7.1	2.7	3.2	3.6	2.8	10.8	7.9
chrIII	9993795	9996146	C05B5.4	5.4	7.8	7.3	3.5	0.7	0.7	0.4	0.9	1.3	0.5	3.7	2.8	4.7	7.4	6.3	12.1	19.2	2.5	0.4	0.7	0.6	0.7	1	1.4	12.6	15.3	0.2	2.7	6.8	15.9	11.8	8.7	5.3	5.4	7.8	10.8	9.9	14.2	14.6	11.3	17.8	9.1	8	12.7	9.8
chrIII	10001285	10003024	C05B5.5	0.9	0.7	1.6	0.4	0.1	0.3	0.1	0.5	0.2	0.3	0.4	0.7	0.7	0.1	0.2	0	0	0	0.1	0.3	0.2	0.7	0.2	0.4	0	0	0	0.3	1.4	0.1	0.4	0.3	0.5	0.5	1.1	0.1	0.1	0.1	0.7	0	0.1	0.1	0.3	0.6	0.3
chrIII	10007882	10010087	C05B5.6	0.1	0	0	0	1	0.5	2.1	1	0.8	0.9	0.1	0	0	0.1	0	0	0.3	0	0.4	1.3	0.5	18.4	20.3	21.8	0	0	0.4	24.8	0.1	0	0.6	0.3	0	0	0.1	0	0	0	0	0	1	0	0.1	1.4	0.7
chrIII	10014502	10016444	C05B5.7	5.9	8.2	4.4	8	3.1	2.2	1.8	2.3	1.6	2.6	5.2	5.4	4	15.1	9.7	5	2.5	5.4	1.6	1.6	0.9	6.3	5	6.3	5	4.4	1.1	6.7	7.2	11.4	22	9.2	10.3	8.9	11.7	18.4	18.1	24	27.2	16.2	14.8	11.3	7.9	30.2	22.2
chrIII	10005366	10006694	C05B5.8	16.8	19.2	14.9	35.6	8.1	4.2	12.7	5.8	4.6	8.7	17.7	21.4	7.5	13.2	8.6	1.5	0.6	11.7	2.9	3.4	5.4	25.9	14.3	15.4	1.1	1.2	4.2	30.2	28.1	7.8	59.4	30.5	25.2	21.7	17.9	13.3	23.8	30	26.7	8.8	10.3	16.3	8.4	41	28.7
chrII	9918065	9920509	C05C10.1	0.1	0.2	0.1	0.1	0.1	0	0.1	0.3	0	0	0.1	0.1	0	0.2	0.1	4.1	2.7	0.1	0	0.1	0	0	0.1	0	2.3	2.2	0.1	0.1	0	1	0.6	0.6	0.2	0.2	0.2	0.4	0.3	0.4	0.9	0.1	0.6	0.5	0.1	0.7	1.1
chrII	9922188	9930771	C05C10.2	10.4	6.3	12.7	6.6	22.7	24.9	22	26.4	24.5	29.2	10.4	10.7	8.5	6.7	5.5	77.7	69.7	5.1	16.3	11.5	18	12.5	12.4	12.5	75.9	70.8	15.5	16.5	5.4	46.9	36.4	9.4	6.8	8.2	5.8	26	15.4	23	27.8	27.7	38.9	6.9	7.6	25.4	32.7
chrII	9934344	9936836	C05C10.3	195.7	97.9	264.8	120.5	91.4	93.6	128.5	93.2	85.5	99.7	134.8	137	217.4	159.7	117.4	43.7	41.4	117.1	86.8	93.4	91.1	72	106.1	63.4	47.2	43.7	85.8	88.4	147.4	30.7	41.1	146.4	124.7	115.8	153.7	55.6	50.8	59	53.5	42.3	29.9	73	101	25.2	29.5
chrII	9931785	9934384	C05C10.4	311.8	439.2	501.9	139.9	127.4	116.6	94.9	100	59.6	115.6	124.9	113.6	94.9	147.4	148.8	0.2	0.5	97.5	95.1	91.6	61.5	1.8	4.7	5.5	0.4	0.6	63.7	2.8	132.9	0.8	1.2	151.5	142.4	241.2	170.9	0.3	1.1	1.3	1.2	0.4	0.6	140.2	58.1	0.5	0.9
chrII	9939094	9940278	C05C10.5	1.3	1.1	1.3	3.8	206.4	327.4	227.1	294.5	290.5	318.4	5	8.5	6.1	1.8	2	960.6	826.9	3.9	273.8	195.8	275	14.1	20.6	17.7	990	883.5	279.6	13.4	2.3	422.9	234.7	2	2.5	1.4	1.7	305.9	147	96.8	152.2	234.1	269.3	1.4	2.1	115.8	239.7
chrII	9940701	9943988	C05C10.6	30.9	15.9	32.7	30.9	80.3	85.7	76.4	92.2	89	97.7	35.1	39.1	27.6	20.3	21.6	145.7	117.4	22.1	67.5	54.4	65.9	51	50.3	45.5	144.7	126.6	65	60.8	24.3	68.7	51.7	23.9	28	30.1	26.4	39.1	22.9	26.3	30.9	35.6	49.1	25.2	23	28.6	36.6
chrII	9938046	9938904	C05C10.7	3.1	1.9	3.5	1.2	12.4	11.6	10.1	13.6	11.2	14	5.3	4.8	3	2	1.9	2.4	2	0.9	8.6	6.5	7.5	9.1	7	7	1.5	1.7	6.9	8	0.9	2	1.1	1.7	3.9	3.3	3.3	1.9	2.6	1.3	1.5	1.3	1.3	3.1	2.8	1.9	0.9
chrII	9917062	9917884	C05C10.8	0	0	0	0	0	0	0.3	0.3	0	0	0	0	0	0.2	0	0	0	0	0	0	0.4	229.2	274.4	269.2	0.2	0.2	0.3	545	0	0	0.3	0	0	0	0	0.4	0.5	0	0.6	0	0	0	0	0	0.3
chrIV	11253962	11255698	C05C12.1	0	0	0	0	3.4	1.3	4.5	3	1.4	1.5	0.1	0	0	0	0	1	0.2	0	2	4.1	2.6	52.6	47.8	50.4	0.9	0.6	2.5	45.8	0	0.2	0.6	0	0	0.1	0.1	0.1	0.1	0.3	0	0.3	0.1	0.1	0.1	0.7	1.6
chrIV	11248879	11259443	C05C12.3	12.8	14.7	18.8	5.6	4.9	4.9	5.6	5.6	5.9	6	9.3	8.9	11	9	8.9	0.1	0	4.7	4	5.8	3.7	5	3	3.4	0	0.1	3.3	6.5	5.5	1.3	5	9.4	7	7.4	9.2	2.9	4.1	6.7	8.9	0.8	2.9	6.6	10.5	4.6	2.8
chrIV	11246425	11248030	C05C12.4	54.2	29.9	59.6	22.9	18.6	10	13.7	11.8	8.6	13	25.9	22.9	17.6	22.9	18.5	0	0.3	2	7.4	10.5	6.6	30.5	31.5	25.3	0	0.1	5.2	25.3	45.6	1.8	8.1	40.9	27.2	28.9	34.5	4.1	7.8	12	15.2	1.6	3.1	37.7	19.2	11.9	4.7
chrIV	11260308	11261148	C05C12.5	0	0.2	0.2	0	20	5.6	24.6	11	8.1	13.1	0	0	0	0	0	1.2	0	0.1	9.1	22.1	11.5	194.8	169.5	191	0.1	0.1	10.1	230.5	0	0	0.2	0	0.3	0	0.2	0	0.3	0.3	0	0	0	0	0.2	0	0
chrIV	11231647	11233101	C05C12.6	3.2	2.7	3.8	2.3	1	0.9	0.9	0.4	0.6	0.6	1.3	0.8	1.8	3.8	2.6	0.3	0.4	0.3	0.9	1	0.8	0.1	0.6	0.4	0.2	0.2	1.2	0.9	3.2	0.3	2.4	1.4	0.8	2.2	1	1.2	1.7	1.8	1.7	0.3	0.6	4.9	3.3	1.3	1.1
chrV	7239750	7241348	C05C8.1	14.9	13.9	18.6	17.5	19.3	19.3	19.2	21.4	17.8	23	14.3	13.8	10.5	11.4	11.8	19.2	17.4	10.3	16	11.6	19.8	20.4	24.2	19.7	16.1	13.1	14.4	22.3	19.1	18	18.2	11.8	17.7	15.7	16.9	20.1	15.1	13.8	12.5	12.5	14.6	10.8	12.4	14.3	12.7
chrV	7231162	7232731	C05C8.2	39.8	15.1	40	18.1	40.6	42	37.7	44.8	39.4	51.5	27.5	30.2	23.8	26.6	21.5	79.3	73.4	23.8	34.3	27.4	40	22.4	19.6	18.3	70.5	73.1	33.8	22.7	15.7	50	53.6	29.2	26.4	28.7	24.4	41.3	35.2	44.2	39	44.9	53.9	17	28	34.8	39.7
chrV	7225350	7226296	C05C8.3	164.6	45	121.5	195.7	21.7	17.2	20.4	24.7	18.1	26.8	180.7	174.4	61.3	68.2	96.7	5.8	7	138.8	21.6	32.8	21.2	12.7	22.2	22.5	6.4	5.2	22	20.8	153	95.9	124.3	139.5	186.2	184.2	148.8	141.9	167.4	177.2	136.4	100.3	139.7	177.5	72.1	173	135.2
chrV	7226356	7230830	C05C8.4	17.6	11.9	19.3	13	32.9	34.5	33.5	38.9	34.9	38	13.7	15.3	12.9	14.3	11.4	102.8	97.1	10.1	28.3	26.3	27.6	22.5	22	18	103.3	97.7	27	25.5	13	69.2	53.7	18.2	10.5	11.1	10.7	50	38.4	51.2	46.1	78.9	59.4	11.3	12.7	44.2	52
chrV	7232654	7234810	C05C8.5	6.7	4.7	7.7	4.6	18.9	22.3	13.2	18.8	20.6	20	8.1	8.5	7.2	4.8	4.5	25.6	28.8	3.5	11.7	9.6	12.3	12.2	13.4	11.1	28.3	28.8	9.7	16	6.1	26.9	19.4	5.9	5.1	6.3	5.2	20	13.3	14.6	15	25	22.8	4.5	6.7	12.4	14.5
chrV	7234905	7237112	C05C8.6	6.3	4.9	10.9	6.6	46.9	45.2	38.1	46.2	45.6	47.6	11.4	11.9	10.5	7.6	7	34.7	36.6	5.1	29.9	28.2	28.5	21.5	20.9	19.6	33.5	36.6	25.6	30.1	6.8	43.6	30.4	8.5	8.8	8.8	8.5	28.6	19.7	26.3	23.9	33.1	34.1	7.7	9.4	24.6	26.2
chrV	7242888	7247279	C05C8.7	127.8	99.4	177.2	147.6	18.3	13.7	18.8	10.6	12.9	11.8	102.3	87.7	127.6	165.3	189.4	2.6	2.6	133.3	17	30.1	25.4	20.3	33.3	27.1	2.9	2.6	21.4	30.1	77.3	54.7	66	80.2	133.4	132.9	108	100.4	102.3	120.8	105	84.8	89.7	97.4	132.4	105.8	72.2
chrV	7252306	7255139	C05C8.8	0	0	0.1	0	0.3	0.3	0.1	0.1	0.2	0	0.1	0.1	0	0.2	0.1	0	0	0.1	0.2	0.3	0.2	0	0.1	0.1	0	0	0.1	0	0.1	0	0.2	0	0.2	0	0.1	0.1	0.1	0.3	0.1	0.1	0.2	0.1	0.1	0.4	0.2
chrV	7237374	7239644	C05C8.9	2.8	3.8	7.9	6	30.6	22.4	20.4	22.6	23.2	27.3	7.4	7.3	4.7	6.3	6.2	38.2	42.5	2.6	16.3	11.8	15.8	13.1	12.4	8	34.2	35.5	13.5	11.8	6	36.1	26.7	4.3	7.6	7.7	6.4	22.7	20.4	25.5	26.3	44.4	30.4	7.9	8.1	21.1	23.5
chrX	11160914	11163620	C05C9.1	4.3	0.4	2.2	11.2	0.3	0.1	0.2	0.2	0.1	0.2	11.8	9.5	1.8	2.6	2.3	0	0	7.4	0.1	0.4	0.2	0.2	0.1	0	0	0	0	0.1	4.1	1.5	2.9	5.4	4	5.2	1.8	4.1	4.3	5.4	5.6	1.8	2.6	9.4	4.5	3	2.5
chrX	11152998	11157577	C05C9.2	0.6	0.3	0.2	0.3	0	0	0.2	0	0.1	0	0.4	0	0.5	0.4	0.5	0	0	0.1	0.1	0.4	0.1	0.3	0	0.1	0.1	0.1	0	0.2	0.4	0.7	1.7	0	0.9	0.6	0.5	1.5	1.6	1.6	1.7	0.3	1.3	0.4	0.5	1.4	0.7
chrX	11142904	11152754	C05C9.3	0.9	0.1	0.9	0.8	1.9	1.5	1.9	1.7	1.7	1.9	1.5	1.5	0.5	1	1.2	1.3	0.9	0.6	1.3	2.3	1.9	2.6	2.8	2.3	0.6	0.6	1.5	3.9	0.3	0.4	0.8	0.7	0.3	0.6	0.9	0.3	0.3	0.4	0.6	0.7	0.6	1.5	1	0.6	0.9
chrIII	6080511	6084686	C05D10.1	62.2	56.1	67.8	47.2	18.9	15	19.1	14.6	16.7	16.6	42.1	39.4	34.8	53.7	40.9	57.2	60.3	38	11.2	16.2	13.2	13	12.8	14.2	52.1	55.4	12.6	24.6	43.6	77.3	91.4	43.3	36.7	34.3	36.3	96.9	84.9	109.6	118.2	66	96.1	75	54.1	111.4	85.9
chrIII	6067805	6072030	C05D10.2	3.9	5.8	4.3	3.6	1.5	0.6	0.9	1.7	1	1.1	3.5	2.3	3.2	8	4.3	0.3	0.9	3.5	1	1.6	1.4	1.5	3.3	1.9	2.5	1.1	1.9	4.3	4.2	6.7	13.5	2.5	3.1	4.4	2.9	15.7	18.9	17.9	22.1	12.3	12.4	9.1	5.5	19.5	12.3
chrIII	6084621	6087404	C05D10.3	6.5	1.7	5.5	6.3	1	0.4	1.6	1.8	0.7	1.5	4.1	5	3.2	1	1.3	9.6	10.9	2.3	0.8	0.8	0.8	4.4	3.9	2.9	10.2	11.6	0.4	5.6	6.1	8.7	5	5.9	3.7	3	1.9	3.5	3.2	4.9	4.4	4.6	7.1	2.6	1.4	5.3	7.6
chrIII	6088633	6102810	C05D10.4	31.6	19.7	25.5	26.3	5.9	3.4	7.4	4.4	4.1	5.3	18.1	17.3	10.8	18.9	13.9	3.3	2.2	19.5	4.1	9.4	4	7.5	7	6.1	3.3	3.1	3.4	9.6	18.8	10.9	24.9	19.7	17.4	19.2	14.3	30.6	34.6	38.8	45.6	15.8	21.5	30.3	15.5	30.7	22.5
chrIII	6436555	6439906	C05D11.1	55.3	34.7	64.1	51.3	48.7	48	45.7	52.3	48.3	55.8	64.6	62.7	52.1	48.1	46.8	68.9	58.1	36.7	42.2	36.4	39.8	39.6	36.6	33.6	65.7	57.7	39.8	50.3	53.2	40.8	34	46.3	56.7	56.2	48.2	30.9	23.4	25.4	27.8	28.4	36.3	51.2	49.9	25.6	24.9
chrIII	6430984	6431740	C05D11.10	47.6	34.1	58.9	56.1	63	66.7	51.4	62.1	57.6	62.9	66.6	62.8	65.4	57.2	65.5	49.1	54.9	59.6	59.4	54.4	55.6	34.9	37.9	33	48.3	52.8	46.4	37.5	64	59.4	61.1	50.2	69.2	75.6	64.9	56.6	90.7	53.9	45.8	69.7	64.8	40.2	68.9	56.4	75.1
chrIII	6440092	6442948	C05D11.11	203.3	172.5	201.4	361.8	273.4	261.4	287.4	237.6	291.4	246.2	535.7	552.2	376.6	252.5	377.6	362.4	310.5	287.9	266	240	351.4	126.7	164.8	151.1	353.3	321	328.2	171.9	287.3	224.9	133.5	175.5	221.1	270.4	297.7	185.6	145.6	128.6	147.8	153.3	150.9	199.9	184.6	128.7	133.8
chrIII	6444639	6446891	C05D11.12	69.1	79.2	87.5	72.1	46.9	42	50.6	54.5	46.8	59.1	68.1	68.4	60.1	59	45.5	122.1	107.8	45.6	38.9	36.4	41	126.3	78.5	79.1	120.7	111.1	42.6	90.1	80.1	102.6	109.6	78.2	76.5	74.9	78.3	98.7	87.9	105	93.3	112.9	81	58.9	39.7	78.6	86.4
chrIII	6442629	6443919	C05D11.13	16.1	14.1	28.4	10.7	7.8	5.4	6	7.2	4.8	5.6	8.3	5.8	9.1	10.7	12.3	8.1	9.6	7.4	6	6.6	6.3	9.3	8.9	7.3	7.9	9.3	6.6	9.4	11	17.3	21.5	10.4	8.9	12.2	11.9	24.4	33.4	29	25.9	16.9	25.2	11.9	11.4	23	21.3
chrIII	6433184	6436448	C05D11.2	12.8	9.5	15.4	12.2	19.1	17.8	15.9	20.7	19	23	15.3	16.1	12.6	11.2	12.5	29.2	24.7	11.1	14.3	11.5	15.1	8.6	9.1	8.1	27.4	26.9	15.2	11.7	12.4	23.6	22	13.4	13.4	12.9	13.2	18.9	14.3	20.7	18.7	19.9	21.3	13.4	11.7	17.5	18.3
chrIII	6432128	6433101	C05D11.3	28.6	24.1	47.2	34	58.3	58.1	44.6	56.7	53.7	62.3	39	33.9	29.1	39.2	37.4	135.9	138.9	29.7	43.8	39.6	48.9	31	32.3	24	146.9	135.8	43.7	28.7	37.9	96.6	95.1	36.6	40.2	45.4	49.8	74.1	71.1	67.4	65	87.1	86	39.6	49	66.2	76.4
chrIII	6407075	6409981	C05D11.4	48.5	24.3	63.1	32.5	10.7	4	8	9	6	9.8	38	32.5	35.9	65.6	40.2	2	2.7	29.5	7.5	14.6	5.4	5.2	12.9	8	1.9	1.9	5.7	15.5	27.5	10.3	18.9	32.5	24.9	23.7	32.8	17.9	23.2	26.7	27.8	20.5	16.6	32.2	29.4	22.4	17.8
chrIII	6409699	6411506	C05D11.5	11.1	8.1	13.9	6.5	9.1	2.2	4.3	2.1	2.2	3.8	5.2	4	5.1	17.3	9.3	0.8	1.5	3.9	3.3	4.6	3.1	7.7	9.5	7.7	1.3	0.7	2.9	14.2	12.6	1.9	1.5	5.5	9	5.5	15.2	2.1	2.6	3.8	4.8	2.2	1.5	3	4.6	3.1	2.1
chrIII	6411526	6414940	C05D11.6	9.5	2.7	12.2	18.9	2	0.4	1.6	1.5	0.8	1.3	20.6	18.4	7.2	11	8.6	0.9	0.9	14.7	0.4	2.5	0.5	0.8	1.5	1	0.3	0.3	0.5	1.1	18.1	0.6	1.1	24.2	16.3	16.8	12.6	1.2	1.1	0.9	1.6	0.4	0.4	20	5.8	1.2	1.4
chrIII	6415718	6421659	C05D11.7	31.4	29.5	28.1	29.2	36.8	31.9	33	42.5	32.6	41.3	36	37	30.7	35.5	31.4	117.2	112.1	21.5	28.1	26.8	30.3	24.7	36.2	27.3	120.7	112.6	27.1	38.1	20.2	72.5	65.3	26.2	36.6	32.7	33.8	56.7	37.1	39.3	46	53.4	58.7	29.6	22.6	42.6	53.2
chrIII	6422405	6427252	C05D11.8	8.4	4.5	9.3	5.6	11.9	11	10.2	12.4	11.3	14	8.6	9	5.2	5.6	6.3	12.9	8.6	4.1	8.3	7.2	7.6	5	5.5	4.3	10.7	10.8	7.9	8.2	6.2	18.8	15.1	7.7	7.6	7.5	6.7	11.6	11.3	16.8	19.5	14.3	18.2	7.9	7	15.7	14.8
chrIII	6427477	6430882	C05D11.9	10	4.3	13	5.8	16.1	14.7	13.4	17.7	14.9	19.8	10.1	9.4	7.5	6.8	5.1	24.5	25.2	5	11.4	10.2	12.3	7.8	7.8	6.4	25.9	23.5	11.1	9.1	5.4	16.5	15.2	7	6.4	7.1	5.9	12.9	9.6	13.9	13.8	12.4	16.9	5.7	7.8	9.8	12.9
chrII	11411817	11415708	C05D12.1	10.4	3.8	8.8	11.4	1.8	1	1.9	1.5	1.4	1.2	8.5	11.1	4.8	6.7	6.5	0	0.1	8	1.1	2.2	1.4	2.3	2.3	2.3	0.1	0.1	1	4.3	8.9	2.8	7.6	7.7	7.8	10.8	6.8	6.5	7	8.9	8.7	4.6	4.4	11.2	7	11.6	6.1
chrII	11418249	11423317	C05D12.2	1.1	1.8	1.6	1.6	3	1.7	2.5	2.1	2.5	1.8	1.4	1.2	1.3	1.9	1.5	0	0	0.6	1.6	3.8	1.9	0.8	2.8	3	0	0	1.6	3.8	1.8	0	0.8	1	1.1	0.8	1.4	0.1	0.4	0.2	0.4	0.1	0.1	0.8	1.1	0.6	0.4
chrII	11424685	11430535	C05D12.3	38.4	20.9	41.5	28.7	43.6	26.3	23.4	28	23.1	27.8	34.2	32.2	39.5	43.6	53.1	0.2	0.1	27.9	31.9	33.7	17.7	15.2	38.8	29.7	0.1	0.1	17.3	27.1	36.5	1.2	2.3	33.5	42.9	49.4	54.4	3.2	4.6	6.7	11.4	1.3	2.7	42.2	34.7	4.4	2.4
chrII	11429919	11432702	C05D12.4	3.8	3.3	4.3	1.4	5.9	6.3	4	4.5	3.1	3.3	1.5	1.4	2.7	3.1	3.6	87.3	82.2	2.8	3.8	4	2	0.7	3.9	3.4	84	83	1.9	3	2.5	36.4	25	2.5	4	5	5.5	34.7	16.7	16.9	11.5	36.3	28.8	3.2	5.5	12.8	21.5
chrII	11434156	11434894	C05D12.5	0	0	0.1	0.5	0.6	0.9	0.6	1.4	0.4	1.3	0	0	0.3	0	0	54.1	58.4	0.1	0.5	0.3	0.7	0.1	0	0.1	54.2	57.9	0.3	0.4	0	26	17.9	0.5	0.2	0	0.3	16.5	10.1	10.9	11.7	5.8	19.9	0.5	0.1	7.9	13.9
chrII	11410049	11411911	C05D12.7	38.2	35.8	44.7	58.4	13.9	9.7	13.6	10	7.7	7.3	43.3	46	61.6	85.2	72.6	2.2	1.4	44.5	10.3	21.9	8.9	26.9	28.3	30.3	0	0.5	9.2	37.6	74.3	5.5	19.5	34.5	39.4	43.1	57.2	7.8	15.1	17.2	29.6	5.2	10.5	66.6	65.8	17.5	16.8
chrIII	5624971	5632447	C05D2.1	19.9	27.4	24.4	19.1	11.1	10.3	10	10.2	10.4	11	13.3	13	15.5	32	25.8	31.2	26.4	17.4	9.9	9.7	11.5	12.9	14.5	12.3	30.7	27	9.2	16.8	20.5	26	23.2	18.7	21.3	19.7	23.9	33.3	29.8	34.6	34	26.8	28.4	18.8	19.8	30.2	26.5
chrIII	5597913	5600018	C05D2.10	22	26.2	24.3	17.5	32.1	40.5	33.9	39	37.1	41.3	19.3	18.7	18.4	15.3	12.9	118.1	106.6	11.7	35.8	31.2	39.4	36.6	33.9	36.1	118.3	110.1	37	38	17.7	79.7	57	25.2	17.9	16.8	17.1	77.1	51.3	42.8	53.3	60.3	66.3	19.1	18.6	59.4	67.4
chrIII	5614929	5617230	C05D2.3	0.1	0	0	0.1	3.1	1.1	3.5	2.1	1.9	1.7	0.1	0.1	0.1	0	0.1	0	0	0.1	1.6	3.8	1.6	47.6	39.5	41.6	0.1	0	1.4	44.4	0.2	0.1	0.1	0	0.1	0.1	0	0	0.1	0.1	0	0	0	0.1	0	0.1	0.2
chrIII	5612231	5614637	C05D2.4	11.3	7.8	11.2	13.4	9.1	7.3	8.2	9	7	10.7	20.5	23.8	17.3	13.2	16.6	0.4	0.4	18.2	8.7	5.8	7.9	10.9	15.2	12.2	0.1	0.2	8.2	19.9	18.3	2.5	4.3	18.7	18.3	18.4	16.3	5.8	8.8	11.5	15.1	3.6	5.4	14.3	12.5	7.5	6
chrIII	5604416	5607511	C05D2.5	7.9	3.7	7.5	6	76.7	86.6	68.8	82.8	82.6	78.6	12.4	12.2	11.8	5.5	5	35.3	32.5	3.5	64.3	56.5	63.1	19.2	18.1	17	32.4	32.5	61.7	18.4	5.3	21.3	20.3	5.4	6.8	9.3	7.6	17.5	9.1	9.7	13.6	11.9	14.7	1.6	6.6	10.2	13.7
chrIII	5600339	5603722	C05D2.6	7	8	9.4	7.4	25.8	28.5	24.8	32.7	27.2	30.5	7.8	8.5	9.1	8.2	7	75.3	65.1	5.6	23.1	17.8	25.6	9.3	7.8	7.5	71.6	64.9	22.8	10.9	7.7	48.2	38.5	6.5	6.2	6.9	6.7	34.4	26.8	26.9	31.2	37.5	44.7	9.7	7.3	33.3	37.1
chrIII	5607465	5610304	C05D2.8	28.9	22.2	37.5	35.4	39.2	28.9	31.8	30.5	31.3	28.3	42.2	44.4	38.5	32.7	43.9	1.6	1.1	34.3	34.4	35.8	32.9	63.3	97	88.5	1	1.2	33.2	110.7	42.2	2.9	5.4	33.6	35.3	31.8	42.8	2.2	3.3	4.1	3.6	2.8	3.6	20.9	24.3	5.7	3.5
chrX	1128980	1132922	C05D9.1	38.8	18.7	39.8	30	23.6	28.1	25.4	23.8	23.8	23	25.7	24.2	22.2	22	26.9	53.7	48.8	27.5	30.2	27.7	32.2	26.2	21.4	22.2	54.1	51.7	30.9	22.9	29.9	42	38.3	29.5	30.7	32.1	30.3	46.9	34.8	31	33.6	30.1	35.6	37.8	27.6	47.6	45.2
chrX	1125166	1128285	C05D9.2	6.6	13.2	9.3	5.7	4.6	3.6	3.3	4.3	3.6	6.4	7.2	7.2	7.3	9.2	7.9	0	0	4.3	3.2	4.2	2.9	5.3	6.6	8.1	0.1	0.1	2	8.4	4.9	0.9	3.4	6.8	6.1	6.9	7.7	4.6	5.6	8	8.8	1.7	3.5	6.8	5.2	4.9	4.8
chrX	1111899	1116791	C05D9.3	19.4	20.2	23.4	27.5	22.5	10.5	20.9	15.1	16.6	14.7	23.5	21.4	21.5	31.5	29.6	9.1	10.9	27.8	13.9	36.3	17.1	16.3	20.2	18.1	8.1	9.2	14.5	20.4	35.2	52.8	53.4	30.7	30.1	29.7	34.5	63	66.7	69.2	61.4	66.8	62	46.9	40.7	66.6	57
chrX	1108063	1108413	C05D9.4	0	1	0	6.3	0	0	0	0	0	0	0	2.6	1.1	0	0.4	0	0	0	0	0.7	0	0	0	0	0	0	0	0	0	0	5.2	0	0	3.1	0	2.6	3	0.9	9.1	4.2	2.5	0	0	1.3	1.9
chrX	1104208	1106244	C05D9.5	16.1	7.1	19.3	10	6.5	5.6	6.2	6.2	5.6	8.7	9.8	13.2	9.1	11.7	12.4	26.1	23.7	12.8	5	5.9	6	9.7	8	7.3	22.9	26.4	3.5	10.8	10.5	56.8	57.9	18.2	14.8	14.8	14.5	67.4	74.2	91.3	76.4	40.8	71.2	11.2	11.7	63.2	60.6
chrX	1117193	1119404	C05D9.7	8.6	14.5	8.1	10.3	5.7	5.9	4.6	8	4.1	7	11.3	7.6	10.8	12.3	10.5	63	87.7	7.9	4.5	2.3	5.3	2.1	1.4	1.7	65.8	75.3	4	2.8	12.5	112	87.7	14.5	15.8	15.5	17.3	91.7	85	82.1	78.5	99.8	80.2	14.1	11.9	101.8	92.1
chrX	1122417	1124231	C05D9.9	13.2	73.8	34.7	11.7	22.5	12.4	33.8	25.3	17.4	29.3	14.1	13.7	24.6	33.9	22.2	0	0	7.7	10.7	20.2	11.6	40.5	19.7	13.6	0	0	12.1	19.9	22.7	0.6	1.7	21.8	15.1	16.4	29.3	1.4	0.4	1.9	2.6	0.4	1.4	6.6	20.4	2.4	2.8
chrX	4588738	4590420	C05E11.1	16.7	13	18.9	18.7	13.2	13.3	14.2	12.2	12	12.3	15.9	17.8	13.4	14.3	15.4	68	67.9	13.3	11.8	11.8	12.2	16.6	12.8	11.8	56.2	60.5	11.6	13.9	16.7	71.1	46	14.3	17	19.4	19	49.8	42.1	52.9	48	102	62.6	14.1	13.8	47.5	51
chrX	4586889	4587966	C05E11.2	0	0	0	0	0	0	0	0	0	0	0	0	0	0	0	0	0	0	0	0	0	0	0.5	0.3	0	0	0	1	0	0	0.2	0	0	0	0.3	0	0.4	0	0	0.2	0	0	0	0	0
chrX	4579479	4581630	C05E11.3	14.1	6.5	9.4	7.7	2.2	2	2.2	2.8	2.3	3.4	6	6.2	3.6	8.9	5.2	13.8	12.7	4.9	1.6	1.6	1.6	2.5	2	1.7	12.4	14.9	1.5	3.7	11.4	43.1	53.6	8.6	6.8	6.1	6.3	52.4	54.4	62.5	75.3	43.5	56.1	12.7	10.5	74.4	51.5
chrX	4571421	4573888	C05E11.4	1.7	1.4	4	0.4	2.5	1.1	2.5	0.2	0.6	0.2	1.4	1.4	5.8	1	1.2	0.1	0	0.1	1	0.5	5.8	19.2	3	0.7	0	0	7.6	10.2	0.7	0	0.3	1.7	0.7	0	1.3	0.2	0.1	0.2	0.6	0	0.1	1	2	0.3	0.4
chrX	4565275	4569534	C05E11.5	11.1	12.8	8.7	12	11.1	11.5	5.1	6.2	9	7.1	18.4	16.5	16.1	13.7	22.2	0	0	12	11.7	9.6	8.2	3.1	10.8	10	0.1	0	5.6	3.9	11.9	1.5	7.1	7.4	16.6	17.6	24.7	5.5	5.6	6.1	7.6	2.2	3.5	7.9	15.2	10.5	5.1
chrX	4562168	4562811	C05E11.6	1.9	3.2	2.3	4.7	3.2	2.3	1.8	2.6	1.4	1.6	2.9	2.7	1.5	3.9	2.7	0	0	0.9	0.4	0.5	3.5	2.1	0.4	1.2	0	0	2.6	1	3.7	1.3	2	3.4	1.6	2.7	0.9	0.7	1.6	1.2	1.4	0.5	0.9	3.3	1.3	1.2	1
chrX	4581570	4585638	C05E11.7	2.6	0.1	1.6	6.2	0.2	0	0.2	0.3	0.1	0.1	6.3	6.5	2.1	2.7	2.7	0.8	0.5	4.3	0	0.4	0.1	0	0.1	0.1	0.4	0.7	0	0.2	4.4	1.9	1.6	3.7	3.3	3.9	1.9	3.7	3.2	4.7	4	2.7	4.1	3.3	2.2	2.5	2.1
chrX	4591253	4592477	C05E11.8	49.6	93.8	41	92.8	36.6	24	38.4	24.9	12.9	23.4	75.6	63.7	65.8	121.3	70.1	0	0.9	65.7	13.5	21.2	14.6	127.7	99.4	103.8	0.2	0	14.2	168.1	68.7	3.9	32.5	92.9	100.1	126.8	119.5	9.7	35.4	24	29.2	1.5	9.2	54.1	48	33.3	22.1
chrV	762734	764658	C05E4.1	1.2	8.1	3	2.1	19.2	16	18.4	18.2	13.4	21.1	1.4	0.6	1	5.5	3.4	20.6	18.8	0.6	17.5	20.8	11.7	27.6	26.5	22	17.5	17.4	11.5	20.1	1.3	13	9.3	3.2	3.2	2.3	3.4	8.6	7.9	6.9	8.7	7.6	9.1	1	2.9	9.8	11.6
chrV	734420	736272	C05E4.10	0	0	0	0	0	0	0	0	0	0.1	0	0	0	0	0	0	0	0	0	0	0	0	0	0	0	0.1	0	0	0.1	0	0	0.4	0	0	0	0	0	0	0	0	0	0	0	0.1	0
chrV	736803	738871	C05E4.11	0	0	0	0	0	0	0	0	0	0	0	0	0	0	0	0	0	0	0	0	0	0	0	0	0	0.1	0	0	0	0	0	0	0	0	0	0	0	0	0	0	0	0	0	0	0
chrV	758039	761979	C05E4.12	0	0.1	0	0	0.1	0.1	0.1	0.2	0	0.1	0	0	0.1	0	0	1.8	3.1	0	0	0.1	0	0	0	0	2	2.2	0	0.3	0	1.6	1.1	0.6	0	0.2	0	0.9	1.5	1.2	1.5	2.1	2.2	0	0.1	1.2	0.8
chrV	751326	752780	C05E4.13	0	0.1	0	0.1	0.2	0.1	0.1	0.1	0	0.1	0	0	0	0	0	0	0	0.1	0	0.1	0	1.1	0.1	0.3	0	0	0	1.1	0.7	0.1	0.6	0.3	0	0.1	0	0.2	0.5	0.7	0.4	0.1	0.4	0	0	0.5	0.9
chrV	728309	734280	C05E4.14	1.7	6.6	3	3	0.6	0.1	1.3	0.9	0.3	0.4	3.4	1.2	1.3	2.1	1	1.1	0.7	0.1	0.2	1.1	0.4	14.4	1.6	2.9	0.6	1.4	1	5.9	2.1	2.4	3.7	1.1	0.8	0.3	0.7	1.6	1.7	0.9	1	1	2	0.3	0.2	2.6	3.3
chrV	756469	757893	C05E4.2	0.1	0	0	0	0	0	0	0	0.1	0	0	0.2	0	0	0	0	0	0	0	0	0	0	0	0	0	0	0	0.1	0	0	0	0	0	0.1	0	0	0	0	0	0	0	0	0	0	0.1
chrV	753334	755049	C05E4.3	1.7	1	1.1	3.5	10.9	11	12.1	6.6	7.7	6.6	2.4	2.5	1.1	2.1	1.4	0	0	1.6	9.1	8	10.6	36.5	24.1	26.4	0.1	0	9.2	56.6	3.4	3.4	7.6	0.9	1.1	2.3	2.8	11.8	11.7	13.9	10.9	11.3	5.6	1.1	1	9.3	6.2
chrV	748344	750468	C05E4.4	0	0	0	0	0	0	0	0.1	0	0.1	0.1	0.1	0	0.1	0	0	0	0	0	0	0	0	0	0	0.1	0	0.2	0.2	0.1	0	0	0	0	0.1	0	0	0	0	0	0	0.2	0	0.2	0	0.1
chrV	743648	745476	C05E4.6	0.2	0	0.1	0.2	0	0	0	0	0	0	0	0	0	0.3	0	0	0	0.1	0	0	0	0.2	0	0	0.1	0	0	0	0	0	0	0	0.1	0	0	0	0	0.1	0	0	0	0	0.1	0	0
chrV	742120	743274	C05E4.7	0	0	0	0	0	0	0	0	0	0	0	0	0	0	0	0.9	0	0	0	0	0.2	0	0	0	0	0.4	0	0	0	0.4	1.7	0	0	0	0	0	0	0.3	0.5	0.3	0.4	0.5	0	1.9	0.8
chrV	724207	728104	C05E4.9	504.5	1439.3	472.6	1023.3	127.7	37.8	316.2	164	71.5	188.1	556.2	612.6	490.9	722.7	212.7	90.8	106.6	307.3	134.1	294.4	129.9	1994.1	809.8	569.1	89.3	97.8	114.1	747.8	1607.3	352	416.9	1605.1	611.5	385.6	552.4	760.6	652.8	600.3	488.1	549.8	324.9	227.3	103.3	499.7	537.2
chrX	12941370	12943477	C05E7.1	35.5	12.3	20.1	26.6	2.6	1	3.6	3.2	1.7	3.4	20.6	20.6	3.1	8.8	3.8	1	1.3	20.2	0.6	5.8	1.4	3.5	5.9	5.4	0.9	1.2	0.7	7.4	12.4	10.3	49.1	20	23	16.6	8.2	18.7	33.8	44.4	49.8	3.1	23.8	81.3	17.4	69.3	44
chrX	12938626	12940641	C05E7.2	45.2	12.6	28	5.7	6.4	1.8	10.9	8.5	4.7	6.1	8.4	8.2	14.5	10.3	2.8	0	0.7	14.1	3	14	3.7	0.1	0.8	0.1	0	0.2	3	0.2	11.5	6.8	28.9	28.4	18.3	14	7.2	5.9	25.9	19.7	33.9	1	14.1	60.4	17.2	32.9	21.3
chrX	12945545	12946492	C05E7.3	4.9	4.8	3.4	10.2	1.9	1	3.7	1	1.2	1.7	3.7	5.8	5.8	9	6.5	2.3	1.9	7.4	2.2	2.5	1.8	5.4	4.4	5.2	1.9	2.1	1.4	6.1	10.6	3.1	21.4	15.3	13.7	11.8	13	2.9	5.6	7.5	8.2	3.7	4.9	17.6	11.6	30.5	25.6
chrX	12965414	12968386	C05E7.4	0	1.2	0.2	0.9	0.2	0.2	0.5	0.3	0.2	0.4	0.5	1	0.6	0.7	0.4	0	0.8	0.4	0.1	0.1	0.2	0.4	0.2	0.4	0.2	0.5	0	0.7	0.9	0.5	0.9	0.9	0.5	0.3	0.2	0.4	0.3	0.1	0	0.1	0.1	1.1	1.5	0.8	1.2
chrX	14734376	14740019	C05G5.1	19.4	5.2	10.4	11.9	6.2	3.3	6.1	4.2	3.8	4.2	8.4	10.3	5.7	9.2	8.7	0.3	0.2	9.5	2.7	3	2.6	4.3	3.2	4.3	0.3	0.6	2.1	3.6	19	5.4	4.9	23.4	18.5	10.7	14.1	5.3	7	8.2	8.7	4.4	11.9	12.7	13.7	7.6	5.7
chrX	14747250	14750321	C05G5.2	6	5.6	7.3	7.5	8.5	9.3	9.1	9	8.3	9	8.4	7.8	7.6	7	7.9	27.5	29.9	6.2	7.1	7.1	7.7	5.8	4.9	4.2	29.6	33.4	7.8	6.9	9.9	37.3	23.6	14	9	6.1	7.2	19.8	17.4	25.4	19.1	28.6	43.1	6.5	12.2	21.7	24.9
chrX	14750787	14751942	C05G5.3	8.1	6.9	9	5.8	2.6	1.9	2.3	2.4	2.8	2.2	4.9	5.1	5.2	6.4	6.4	4.5	9.9	5	2.3	3	2.7	6.8	5	4.4	6	7	2.7	6.5	7.2	15.5	22.8	12.1	7.4	6	4.6	18.6	20.7	27.1	17.9	14.2	30.4	7.1	11	21.8	22
chrX	14753954	14756390	C05G5.4	152	131.2	159.6	200.5	97.1	94.3	111	85.9	84.6	88.5	145.3	159	161.6	159.3	217.8	148.5	152.8	262.8	114.6	143.4	130.2	159.8	182.2	158.7	145	140.9	129	129.8	313.1	277.6	154.4	311.3	318.6	226.4	234.2	198.5	167.4	161.8	167.6	184.1	293.4	175.1	362.7	180.4	164.9
chrX	14756005	14760894	C05G5.5	0	0.1	0.2	0.3	0	0	0.1	0.1	0.1	0.2	0.2	0.2	0.1	0.5	0.4	5	3.2	0.1	0	0	0	0	0.1	0.2	4.2	5.3	0	0.2	0.2	14.8	10.2	0	0.7	0.4	0.1	7.3	6.2	9.3	5.2	8.1	20.6	0.1	0.4	9.5	8.2
chrX	14743600	14743711	C05G5.7	2442.2	2217.7	1024.5	13564.7	37.1	0	124.4	0	55.3	36	4605.1	4574.5	4044.3	5601.1	11569.8	0	92.9	9392.7	33	261	34.2	54.6	0	14.3	54.5	108.3	0	0	14207.9	750.6	290.9	7462	19583.3	22869	33776	1014.4	1946.3	694.8	616.7	1281	1321.3	19309.1	7438	384.8	327.8
chrIV	627536	633965	C05G6.1	1.3	1.1	1.6	2.3	7.6	6.4	8	4.9	7.8	5.5	2.5	2.9	2.2	1.1	1.1	1	2.1	1.2	6.5	9.5	10.2	3.6	2	1.7	2.3	1.9	10.3	3.2	2	5.4	3.9	3	1.7	2	2.2	7.1	6.2	4.5	6.1	4	6.1	1.8	2	6.1	5.3
chrIII	5635436	5654514	C05H8.1	13.4	10.3	16.7	8.1	1.9	1.3	2.2	2.7	1.9	3	4.7	4.5	5.1	11.2	8.4	0.1	0.5	7.6	2.1	2.5	2.2	6.4	6.4	6.1	0.1	0.3	2	9	6.3	3	8.1	6.7	6.1	7.5	7.3	7.2	10.6	11.1	12.1	4.6	6.4	11.2	9.2	10.3	6.8
chrII	10559957	10563349	C06A1.1	174.5	77.2	177.2	143	235.8	283.6	228.3	287.4	273.2	277.3	160.7	152.7	135.2	108.6	116.2	153.3	151.5	108.3	227.8	185.4	231.6	182.9	171.7	183.3	153.9	150.4	221.7	195.4	151.6	120.8	89.5	131.4	155.6	166.9	140.6	86	55.1	60.2	69.3	74.6	89.7	160	138.5	66.4	78.4
chrII	10568844	10572056	C06A1.2	29.4	14.8	31.6	17.3	6.5	2.6	6.8	3.5	3.8	4.8	13.7	11.7	14.6	24	19.6	0	0.6	12.8	3.3	5.8	4	14.3	12	11.5	0.2	0.2	3.3	16.5	28.5	2.6	10.9	15.6	18.3	22.8	24.4	4.2	17.5	14.3	20.2	3.7	7	23.2	23.3	11.5	9
chrII	10572203	10574011	C06A1.3	0.1	0.2	0.1	0.2	5.3	2.2	6.5	3.8	3.1	4.7	0.1	0.2	0.1	0.2	0.1	0.5	0	0.1	2.8	7.2	4.9	118.6	98.6	118.7	0.4	0.2	3.1	99.9	0.2	0	0.1	0.6	0.3	0.1	0.2	0	0	0.1	0.2	0.1	0.1	0.6	0.2	0	0.1
chrII	10579306	10580552	C06A1.5	102.9	46.8	126.4	70.1	103.5	104.1	101.3	98.4	101.4	97.5	87.1	75.7	91.8	87.5	85.8	340.9	345.3	71.7	97.7	97.5	95.4	56.9	46	44.5	333	333.8	88.8	67.1	65.5	250.3	184.4	62.9	76.8	82.4	89.2	170.8	192.5	156.7	128.6	256.3	210.4	68.2	92.8	171.3	203.4
chrII	10564114	10564618	C06A1.6	2.1	0	1.2	0.5	0.3	0	0.9	1.4	0.2	1	0.2	0.5	0.3	0.2	0	0	0	0.6	0	0.5	0	0	0	0	0	0.2	0	0	0.5	0	0	1.1	0	1.2	0	0.2	0	0	0	0	0	0	0.1	0	0
chrII	10564851	10565341	C06A1.7	4.1	0	2.9	0.9	0.5	0.4	0.5	1.2	0.2	0.8	0.5	1.9	0.9	0.2	0	0	0	0.5	0	0.4	0	0	0	0	0	0	0.3	0	0.5	0	0.5	0	1.2	3.3	0	0.2	0	0	0	0	0	0	0.3	0	0
chrIV	17427679	17429566	C06A12.3	8.8	5	8.7	8.9	27.1	14.3	20.2	15.8	18.2	17.5	12	15.3	9.3	9.5	8.9	3	1.5	11.8	13.4	17	16.2	23.2	18.4	20.5	2.1	2	11.8	27.1	11.2	2.9	3.2	6.9	9.4	8.7	8.7	5.4	7.3	7.4	9.9	7.1	5.4	7.6	11.2	5.5	4.1
chrIV	17432939	17440054	C06A12.4	0.4	0.1	0.3	0.3	0.2	0	0	0	0	0	0.2	0.2	0	0.3	0.2	0	0	0.2	0	0.1	0	0.2	0.1	0.2	0	0	0	0.2	0.4	0	0.1	0.1	0.1	0.2	0	0.2	0	0.3	0.3	0	0.1	0.4	0.4	0	0.1
chrIV	17429718	17431931	C06A12.5	0	0.2	0	0.1	0	0.4	0.7	0	0	0.1	1.2	0.8	0	0.4	0	0.2	0	0.1	0.1	0.1	0.1	0.6	0.3	0.2	0.3	0.3	0.3	0.5	0	0.1	0	0	0.1	0.1	0	2.6	1.3	1.2	2	1	0.2	0.1	0	0.2	0.3
chrIV	17437300	17438118	C06A12.8	0	0	0	0	0	0	0	0	0	0	0	0	0	0	0	0	0	0	0	0	0	4.8	6.6	6.9	0	0	0	9.4	0	0	0	0	0	0	0	0	0	0	0	0	0	0	0	0	0
chrI	6012059	6021985	C06A5.1	7.9	5.3	11	5.5	18.6	19	17.1	23.1	19.9	22.8	7.5	8.9	7.5	6.9	6.2	27.7	22.6	3.9	14.8	11	14.1	7.5	7.8	6.5	28.1	24.3	12.8	10.3	4.8	19.3	13.5	6.7	7	7.5	5.5	12.4	8	10.3	12.2	15.5	13.7	7.2	6.9	9.2	12.4
chrI	5982520	5982971	C06A5.10	1.2	0.7	0.6	1.6	9.3	16.3	11	9.1	12.9	14.2	0	7.3	2.2	0.4	0.7	5.9	2.5	0.5	6.7	9.5	11.5	2.9	1.6	3.1	3.9	1.5	3.4	3.9	2.3	5.4	3.9	0	0	0.7	2.1	2.2	4.9	2.6	0	5	4.9	0	1.1	2.6	3.8
chrI	5991072	5993213	C06A5.11	3.2	3.4	4.3	2.8	7.2	6.1	5.6	7.3	7.1	8.2	3.6	4.1	2.3	2.6	2.5	6	6.9	1.7	4.4	4.6	5.1	3.6	3.7	3.2	8.7	7.8	4.5	3.4	2.5	6.6	4.7	2.5	3.3	2.8	3.8	6.5	4.6	7	5.9	5.4	6.4	2.7	1.9	4.7	5.5
chrI	6004654	6007597	C06A5.12	2	1.8	3.2	3.5	3.2	3.1	3.6	3.9	3.2	4.8	8.6	2.9	5.4	2.9	2	5	3.2	2.1	2.5	3	3.6	13.5	15	16.7	5.9	5.6	2.5	16.8	4.4	13.5	16.3	0	6.2	2.6	4.2	21.3	16.2	14.8	14.7	15.8	9.9	1.5	3.3	17	20.5
chrI	6006334	6007326	C06A5.2	0	0	0	0	1.5	0.6	1.6	1.7	1.1	1.1	0	0	0	0.2	0	2	0	0	2.1	3.1	1.3	34.7	37.4	44.8	2.3	1.8	1	37.5	0	0	0.7	0	0	0	0	0.5	0	0	0	0.5	0.2	0	0.1	0.1	0.1
chrI	5986493	5990843	C06A5.3	10.2	10.4	12	9.7	26	25.2	23.1	31	25.8	30.5	9.6	8.4	7.9	12.9	9.1	19.7	21.6	5.9	22.2	15.6	22.1	14	17.3	13.4	20.6	20.4	20.2	16.6	9.7	29	29.5	11.3	10.1	8.4	10.1	26	21.7	31.8	26.9	25.5	31.4	10.3	8.4	30.4	28.2
chrI	5980792	5981590	C06A5.4	2.6	1.2	2.2	1.3	6.6	6.7	6.3	7.6	5.4	8.8	4.5	2.1	1.6	1.6	1.4	0.4	1.7	1	5.5	4.6	6	7.6	4.5	4.9	0.2	0.5	7	6	0.6	0.6	1.8	0.3	2.3	2.9	2.2	0.5	0.4	0.7	0.9	0.7	0.9	0.8	2.2	1.3	1.7
chrI	5981817	5982454	C06A5.5	1.7	1.7	1.3	1.4	3.9	4	4.7	4.4	5.1	5.3	2.9	4.7	2.1	1.8	1.6	1.2	2.3	2.6	3.8	2.2	3	1.5	1.5	2.9	2.2	4.2	3.4	3.7	2.4	6	7.5	0.5	1.5	2.5	2.3	5.1	3.4	4.2	3.2	5.3	4.1	1.6	1.3	5.8	5.5
chrI	5978691	5985873	C06A5.6	6	1.8	4.2	4.3	44.1	45.8	36.1	42.6	48.2	48.1	8.8	8.8	7.4	3.8	3.8	18.7	14.8	3.6	34.4	28	31.5	25	21.7	20.6	18.5	17.7	27.6	29.6	5.4	14.2	11.4	3.3	5.8	6	4.9	8.4	6.2	7.2	8.2	11.3	11.4	2.2	5.2	6.8	8.1
chrI	5992664	6001101	C06A5.7	77.7	40.7	99.1	38	38.8	27.9	36	32	29.9	36	45.2	43	41.3	62.7	43.1	38.1	35.1	28.5	22.7	29.7	24.5	28.9	32	23	36.9	36.3	21.1	43.1	49.7	48.5	65.4	41.6	41	36.5	43.8	50.9	51.4	67.6	71.8	45.3	53.3	45.5	41.7	55.2	46.8
chrI	6008079	6009608	C06A5.8	1.6	1.9	2.2	1.6	28.8	28.4	27.8	36.4	33.2	30.2	3.8	3.4	2	1.3	0.5	9.6	6.8	0.7	22.9	18.8	23.9	17.9	18.2	12.5	9.1	8.1	21.5	18.6	1.2	4.5	7.6	3.3	1.8	2.4	1.5	6.4	5	2.9	2.3	2.6	4.2	0	1	3	3.1
chrI	6009782	6011525	C06A5.9	4.6	8	6.2	4	29	33.2	30.1	35.8	30.3	33.1	8.4	10.9	8.4	4.5	2.9	48.3	44.7	2.6	20.7	17	23	22.7	19.6	17.6	46.3	45.1	21.5	27.3	5.4	27	15.5	8.6	3.8	4.5	5	16.9	7.4	10.8	11.6	22.9	18.5	1	3.3	9.1	17.2
chrIV	7846629	7854550	C06A6.2	18.7	12.4	24.7	16.4	6.9	4.6	6.1	8.2	5.5	8.1	17.6	14.9	19.3	19.6	17	33.6	39.1	9.8	4.7	4.1	4.1	3.7	4.6	3.8	32.4	37	4.3	6.3	18.4	44.1	31.2	20.3	15.9	11.4	17.8	32.9	30.6	47.3	36.9	44.6	48	17	13.6	30.6	29.6
chrIV	7830549	7832428	C06A6.3	11.5	14.6	11.9	11	25.8	24.1	24.3	26.2	22.9	30.5	17.3	16.3	12.8	15	12.5	62.8	59.5	8.3	16.3	16.4	14.6	13.6	12.9	9.2	66.6	63.5	12.5	16.2	18.9	49.1	42.4	11.8	16.6	14.7	15.1	29	25.8	45.1	33.6	43.4	42.4	15.8	11.9	32.4	35.6
chrIV	7826315	7829289	C06A6.4	32.6	52.4	40.1	35.6	91.6	70.8	79.6	63	72.9	71.3	39.9	38.9	35.7	48.2	44.1	68.4	56.8	29.6	58.3	81.6	67.6	37.8	40.1	32.6	61.1	55.6	64	40.3	44.4	37.4	38.3	39.6	33.5	38.6	44.8	32.8	28.7	29.2	39.3	31	29.9	23.5	38.8	27.5	26.7
chrIV	7832330	7834663	C06A6.5	25.5	33.5	34.9	63.8	19.6	15.6	15.9	18.3	13	20.4	79.5	77.7	62.7	61.9	58.1	12.2	15.2	29	10.5	15	11.1	27.3	27.3	26.9	11.1	13.3	8.6	43	92.8	72.3	81.2	82.8	64.8	58.7	67.7	73.6	81.6	92.9	94.8	79.1	76.3	63.8	38.3	91.1	74.6
chrIV	7837360	7837973	C06A6.7	0.3	0	1.2	0	3.4	0.5	2.9	1.3	1.1	1.4	0.2	0.5	0.4	0.3	0.1	0	0	0	1	2.5	0.8	36.2	30.6	36.2	0.1	0.1	0.6	39.5	0	0.9	1.8	2.4	0.3	0	0.4	0	1.1	1.2	0.7	0.1	1	1	0	1.6	1.3
chrII	7773827	7777780	C06A8.1	157.4	170.9	152.9	211.8	74.6	69	92	73.2	90.5	80	283.2	279.9	237.6	184.6	187.9	45	47	130.9	67.8	81.4	79.6	97.7	94.6	74.2	44.6	44	76.5	140.5	191.4	56.7	52.6	151.1	128.5	116.4	156.4	101.6	109	91.7	104.8	53.5	61.7	139.9	135.4	65.2	57.7
chrII	7779289	7781202	C06A8.2	10.1	5.6	9.1	5.9	34.4	29	26.5	32.7	30.3	38.3	10.6	10.3	7.9	6.1	6.3	79.5	71.6	4.5	24.6	19.5	23.3	12.5	13.9	12.4	74.1	68	21.7	15.9	5.3	42.7	45.2	7.1	6.5	6.2	6.6	40.6	23.2	30.5	26.4	42.6	34.7	5.5	8	32.9	38.5
chrII	7790507	7791517	C06A8.3	1770.7	1923.8	2536	1592.1	911.3	789.6	1159	920.2	853.4	900.5	1521.7	1397.2	2457.8	1644.3	1932	1323.3	1733.7	1049.4	992.4	1457.3	1314.7	2553.3	1731.4	1725.6	1314.8	1619.8	1256.8	1520.8	1976.2	1413.8	992.1	1898.4	1475.5	1399.8	1638.4	1398.1	1409.8	1055.1	868.2	1631.3	1143.3	1747	1648.8	1261.7	1523
chrII	7783764	7784595	C06A8.4	5.7	2.9	8.5	5	40.3	49.2	41	53	46.5	48.4	10.5	7.8	7.7	3.5	4.1	52.5	47.3	4.2	34.1	29.9	39.1	16.8	16.8	17.7	54.3	47.7	32.1	20.8	6.3	33.8	22.6	7.6	6.5	7.8	6.1	20.1	11.8	12.8	14.8	20.7	20.4	2.1	4.9	10.4	18.7
chrII	7781526	7783296	C06A8.5	12.6	5.8	13.2	12.4	32.8	29.8	30.3	36.5	32.5	33.2	16.5	16	12.4	11.5	10.7	79.7	97	12.4	22.1	22.1	21.2	57.5	50.8	47.2	77.8	92.1	20.3	68.7	11.2	119.3	76.7	13.3	13.8	13.7	12.2	65.3	50.4	78.9	58.9	133.1	105.5	25.6	17.8	68.5	78.5
chrII	7772514	7773860	C06A8.6	0	0.1	0.1	0.2	7.8	2.2	7.2	6	2.9	5.5	0	0	0.1	0	0.2	0.2	0	0	2.2	6.5	3.3	90.3	95.1	104	0.4	0.1	1.9	117.5	0	0.2	0.4	0.3	0.1	0	0.2	0	0	0	0.3	0	0.1	0	0.2	0.4	0
chrII	7763884	7765464	C06A8.7	0	0	0	0	0.1	0	0	0	0	0	0.2	0	0	0	0.1	0	0	0	0	0	0	0	0.1	0	0	0	0	0	0.1	0	0	0.4	0.1	0	0	0	0	0.2	0.3	0	0	0.3	0.1	0	0.2
chrII	7765309	7771965	C06A8.8	24.7	16.5	49.2	7.7	8.7	5.9	5.5	6	4.4	8.5	9.9	9.5	13.5	28	14.2	1.8	5.4	6.1	2.8	6.2	4.3	9.8	5.7	3.6	2.8	2	3.7	8.5	14.4	8.3	20.2	16.2	18.4	17.1	25	15.4	30.4	31.2	20.3	20	20.6	27.9	29.1	19.5	25.1
chrII	7785021	7794267	C06A8.9	5.2	2.7	5.8	4.9	1.1	0.7	1.7	1.1	0.7	1	3.6	3.9	3.8	5.3	3.1	1.2	1.4	1.9	0.5	0.8	0.8	1.9	1.3	1.9	1.6	1.3	0.6	2.7	3.7	1.4	4.1	4.9	3.2	3.3	3.9	1.7	2.1	3.9	4.3	1.5	1.6	4.9	3.9	4.5	2.9
chrV	13902780	13903872	C06B3.1	0	0.1	0	0	0	0	0	0	0	0	0	0	0	0	0	0	0	0	0	0	0	0	0	0	0	0	0	0	0	0	0	0	0	0	0	0	0	0	0	0	0	0	0	0.1	0
chrV	13918626	13920018	C06B3.10	0	0	0	0	0	0	0	0	0	0.1	0	0	0	0	0	0	0	0	0	0	0	0.1	0	0	0	0	0	0	0	0	0	0	0	0	0	0	0	0	0	0	0	0	0	0.2	0.2
chrV	13921015	13922390	C06B3.11	0.2	0	0	0	0	0	0	0	0	0	0	0	0	0	0	0	0	0	0	0	0	0.1	0	0	0	0	0	0.3	0	0	0	0	0	0	0	0	0	0	0	0	0	0	0	0.1	0.1
chrV	13924136	13925793	C06B3.12	0	0	0	0	0	0	0	0	0	0	0	0	0	0	0	0	0	0	0	0	0	0	0	0	0	0	0	0	0	0	0	0	0	0	0	0.1	0.1	0.1	0	0	0	0	0	0	0
chrV	13926683	13929306	C06B3.13	0	0	0	0	0	0	0	0	0	0	0.1	0	0	0	0	0	0	0	0	0	0	0.1	0	0	0	0	0	0	0	0	0	0	0.1	0	0	0	0	0	0	0	0	0	0	0	0
chrV	13929788	13931238	C06B3.14	0	0	0	0	0	0	0	0	0	0	0.1	0	0.1	0	0	0	0	0	0	0	0	0	0	0	0	0	0	0	0.2	0	0	1.2	0	0	0	0	0	0	0	0	0	0	0	0	0
chrV	13931510	13932184	C06B3.16	0	0	0	0	0	0	0	0	0	0	0	0	0	0	0	0	0	0	0	0.3	0.3	2.1	1.9	1.8	0	0	0	1.8	0	0	0	0	0	0	0	0	0	0	0	0	0.1	0	0	0	0.2
chrV	13899498	13902639	C06B3.2	0.3	0.2	0	0.1	0.1	0.1	0.2	0.2	0	0.1	0.1	0	0.1	0.1	0	0	0	0	0.1	0	0	0	0.1	0.1	0	0.1	0.2	0.4	0.3	0.1	0.3	0.3	0.1	0.2	0.2	0.1	0	0.2	0.1	0.1	0	0.3	0.2	0.2	0.2
chrV	13896642	13898474	C06B3.3	22.7	4	40.8	30.2	6.9	8	7.5	5.6	7.5	6.4	24.6	19.2	9.8	25.8	28.4	0.2	0.2	23.3	5.1	2.5	13.2	1	4.4	19.7	0.1	0.1	10.4	5.4	2.6	0.8	2.7	2.4	3	5.4	6.6	0.3	0.7	0.4	0.6	0.5	3.4	10.7	11.8	3.5	3.6
chrV	13906475	13908023	C06B3.4	7.9	19.3	12.4	14.4	9	6.2	9.4	7.7	6.4	10	14.8	13.7	10	20.4	10.8	9.7	6.7	5.3	5.9	6.5	5.7	30.5	21.3	14.6	6	6.6	7	25	17.5	11.5	19.9	19.1	17.5	13.3	18.4	16.3	13.5	21.8	14.3	15.6	11.6	7.6	7.1	14.8	15.8
chrV	13904596	13905982	C06B3.5	0	0	0	0	0	0	0	0.1	0	0.1	0.1	0	0	0	0.1	0	0	0	0	0	0	0	0	0	0	0	0	0.1	0.1	0.1	0	0.3	0	0	0	0	0	0.1	0	0	0	0	0	0	0
chrV	13908113	13909499	C06B3.6	59.2	129.8	40.7	141.8	47.5	17.3	89.1	49.4	14.5	64.4	49.2	46.5	29.1	122.5	66.8	3.5	2.8	31.8	41.4	58.7	46	115.8	198.7	116.7	4	3.2	40	72	100.4	2.6	28.9	64.4	97.1	120.4	145.4	4.9	8.5	7.8	9.4	10.4	3.4	46.2	17.7	13.9	10.8
chrV	13909733	13911510	C06B3.7	6.7	5.2	22.2	9.1	0.9	0.5	3.5	0.9	0.3	1.1	1.3	2.3	2.4	3.9	3.4	0	0	0.9	1.1	0.5	2.7	23.1	5.4	6.6	0	0	2.7	5.2	5.4	0.1	2.8	5.2	1.9	3.3	6.1	0.1	0	0.4	0.2	0.2	0.2	1.5	5.5	1.7	1
chrV	13912065	13915422	C06B3.8	2.9	4.2	3.4	1.8	0.3	0.1	0.1	0.2	0.2	0.1	1.3	1.1	0.5	2.5	1.6	0	0	0.7	0.1	0.2	0	0.2	0.3	0.2	0	0	0.1	0.6	1.6	0.2	0.6	1.9	1.6	1.2	1.2	0.4	1	1.3	1.6	0.4	0.4	2.7	1.6	1.5	0.8
chrV	13916481	13918037	C06B3.9	0	0	0	0.1	0	0	0	0	0	0	0	0	0	0	0	0	0	0.1	0	0.1	0	0	0	0	0.1	0	0	0	0	0	0.1	0	0	0	0	0	0	0	0	0	0.1	0.4	0	0	0
chrV	15479525	15481659	C06B8.1	1.3	2.4	2.5	1.5	0.1	0.1	0.1	0.1	0.2	0.3	1.3	0.6	1.4	2.5	2.5	1.1	2	0.6	0	0	0.2	0.1	0.2	0.2	0.7	0.6	0	0.1	1	2.4	3.4	2.6	1.9	1.5	3.4	4.6	3.9	4.9	5.8	3.8	5	2	1.4	3.9	4.3
chrV	15493961	15495743	C06B8.10	0.3	0.5	0.3	0.3	0.1	0.1	0.1	0.2	0	0.1	0.2	0.1	0	0.4	0.3	0	0	0.1	0	0	0	0	0	0	0	0	0	0	0	0	0.1	0	0	0.1	0.3	0	0	0.1	0	0	0	0.6	0.1	0.1	0.1
chrV	15486369	15487100	C06B8.11	0	0	0	0	0	0	0	0	0.2	0	0	0	0	0	0	0	0	0	0	0	0	0.5	0.2	0.3	0	0	0	0.1	0	0	0	0	0	0	0	0	0	0	0	0	0	0	0	0.1	0
chrV	15476045	15478548	C06B8.2	12.9	7.8	11.1	5.4	2.9	2.2	1.5	2.3	2.1	2.7	4.2	4.7	3.1	3.7	4.4	0	0	4.5	1	3.2	0.7	0.8	1.3	1.7	0.1	0.1	0.9	0.7	5.9	3.2	5.5	4.1	9.6	7.3	7.9	9	9	13.1	15.6	5.4	5.5	20.5	5.9	7.8	4.9
chrV	15484035	15484619	C06B8.3	0.4	0	0	0	0	0	0	0	0	0	0.3	0	0	0	0.1	0	0	0	0	0	0	0	0.2	0	0	0	0	0.1	0.4	0	0	0	0	0	0	0	0	0	0	0	0.1	0	0	0	0
chrV	15491049	15492752	C06B8.4	0.7	2.9	0.8	0.3	0.2	0.1	0.1	0.2	0.1	0.1	0.1	0.1	0	1.4	0.4	0	0	0.1	0.1	0.1	0.1	0	0	0	0	0	0	0	0.1	0	0.1	0.3	0.1	0.2	0.4	0	0	0.1	0	0	0	0.4	0.2	0	0.1
chrV	15496250	15497549	C06B8.6	0	0.1	0	0	0	0	0	0	0	0	0	0	0.1	0	0	0.2	0	0	0	0	0	0	0	0	0	0.2	0	0	0	0.3	0.5	0	0	0	0	0.1	0.4	0.7	0.4	0.6	0.2	0	0	0.6	1
chrV	15498724	15511403	C06B8.7	4.2	3.1	3.6	2.2	1.9	1.9	1.5	2.4	1.9	2.3	2.9	2.9	1.7	1.2	1.4	7.6	10.5	2	1.5	1.6	1.3	3.2	3.3	3.3	7.9	9.8	1.4	6	3	27.8	19.6	2.9	2.6	2.1	2.1	22.7	21.2	26.8	22.2	33	23.9	4.9	2.1	27.5	28.1
chrV	15512147	15512755	C06B8.8	3775.4	6794.7	4028.1	9829	5851.6	6337.7	5753.7	6851.3	5183.6	10029.4	10089.9	10446.3	8290.9	6411.2	8321.4	1026.9	1378.6	7743.3	5358.5	5684.5	5944.8	5235	4717	5031.1	1114.9	1241.2	5116.8	4725	10349.3	2428.9	3009.8	11269.2	11514	15835.8	15647.2	5032.2	7608.2	3450.9	3335.8	1841	3058.8	6109.1	7694.5	3373.1	3445
chrV	15488045	15489383	C06B8.9	0	0	0	0	0.1	0	0	0	0	0	0	0	0	0	0	0	0	0	0	0	0	0	0	0	0	0	0	0	0	0	0.1	0	0	0	0	0	0	0	0	0	0	0	0	0.1	0.2
chrII	9358471	9369040	C06C3.1	28	14.6	30.8	25.8	43.7	40.9	41.1	43	39.8	45.3	23.2	22.5	18	20.4	20.3	57.1	58.2	18.3	35.4	38.1	38	37.1	33.7	34.1	57.6	58.2	37.7	43.8	23.1	85.7	78	19.5	19	19.4	18.5	102.6	90.8	111	105.7	116.2	98.9	27.2	22.7	91.9	86.4
chrII	9375799	9377150	C06C3.10	4.8	2	2.8	9.5	1.9	0.6	1.8	0.8	0.6	0.6	7.8	6.7	2.9	1.3	1.8	0.6	0.8	3.7	0.6	1.3	0.4	19.8	17.4	21.7	0	0	0.5	26.7	8.8	5.3	16.4	8.2	6.8	5.2	3.6	11.2	12.8	14.1	7.6	3.7	8.2	13.9	4	19.1	12.6
chrII	9375047	9375789	C06C3.12	2.5	4.4	1.1	2.8	0.9	1.3	0.3	0.7	0.9	1.1	2.8	1.4	2.2	1.2	2	0	0	1.9	2.4	1.5	2.4	0.5	0.7	1.6	0.2	0.2	1.8	1.4	2.5	0.1	0.7	4.4	1.4	4.1	3.6	0.3	1.2	0.5	2.6	1	0	3.6	3.2	1.3	1.4
chrII	9369118	9372312	C06C3.3	0.9	0.4	1.3	1.8	0.2	0.1	0.3	0.2	0.2	0.3	1.2	1.5	0.4	0.8	0.4	0.3	0	0.9	0.1	0.3	0.1	0.9	0.9	0.5	0.1	0.1	0	0.8	0.9	0.5	1.4	0.8	1.5	0.9	0.2	1.3	2.4	2.6	2.6	0.9	0.9	1.4	1.2	2	1.1
chrII	9373231	9374795	C06C3.4	3.6	1.5	3.6	6.5	0.6	0.4	0.4	0.2	0.3	0.9	5	6.9	3.6	1.5	2.2	0	0.2	2.3	0.1	0.3	0.5	0.5	0.1	0.6	0	0.1	0.2	0.7	6.9	6.9	14.5	8.2	4	4.9	5	9	9.8	9	9.1	4.8	7.8	5.7	3.7	15.5	12
chrII	9383318	9384936	C06C3.6	0.4	0.8	0.4	0.2	0.5	0.5	0.2	0.4	0.5	0.8	0.3	0.4	0.1	0.2	0.1	0.4	0.8	0.1	0.6	0.5	0.4	0.2	0.1	0.1	0.5	0.4	0.5	0.1	0.4	0.4	0.8	0.3	0.4	0.7	0.3	0.3	0	0.4	0	0.5	0.3	0.7	0.5	0.7	0.8
chrII	9385479	9386478	C06C3.7	0	0.3	0.3	0.2	0.8	1	0.2	0.9	0.8	0.4	0.2	0.1	0.2	0.4	0.1	16.2	8.2	0.1	0.8	0.4	1	0.2	0	0.3	13.1	11.4	1.3	0.2	0	7.6	5	0	0.7	0.4	0.1	5	1.9	1.4	1	2.8	5	0.3	0.5	2	4.9
chrII	9386524	9390841	C06C3.8	0.4	0.3	0.1	0.1	0.7	0.2	0.8	0.6	0.2	0.4	0.2	0.3	0.1	0.2	0.3	0	0.4	0.2	0.6	1.1	0.8	4.2	5.2	5.8	0	0	0.6	7.1	0.4	0.1	0.3	0	0.1	0.3	0.2	0.1	0.1	0.1	0.1	0	0.1	0	0.3	0.4	0.2
chrII	9376395	9378223	C06C3.9	2.3	1.6	3.2	3.3	0.6	0.2	0.7	0.5	0.6	0.7	4.1	5.6	3.6	1.4	1.8	0	0.3	1.5	0.7	0.7	0.3	0.9	0.1	0.9	0.2	0.1	0.5	0.4	3.6	3.4	7	3.6	3	3.3	3.3	7.3	6.4	5.8	5	2.2	4.7	6.1	3.1	7.2	6.9
chrV	16010689	16012092	C06C6.1	0	0	0	0	0	0	0	0	0	0	0	0	0	0	0	0	0	0	0	0	0	0	0	0	0	0.1	0	0	0	0.1	0	0	0	0	0	0	0.2	0	0	0	0	0	0	0	0
chrV	16008311	16009644	C06C6.2	0	0	0	0	0	0	0	0	0	0	0	0.1	0	0	0	0	0.3	0	0	0	0	0	0	0	0	0.1	0	0	0	0.1	0	0.3	0	0	0	0	0	0	0	0	0.1	0	0.1	0.1	0.1
chrV	16006283	16007585	C06C6.3	0	0	0	0.1	0	0	0	0.1	0	0	0.1	0	0	0.4	0.1	0	0	0.2	0	0.1	0	0.2	0.4	0.2	0.1	0.2	0	0.3	0.1	0.1	0	0	0	0	0	0	0	0	0	0	0	0	0.1	0.1	0.2
chrV	16002574	16004708	C06C6.4	7.6	4.9	3.9	8.4	0.9	0.8	3.7	1.6	1.3	1.1	3.9	4.6	4.3	5.1	4.2	0.2	0	3.5	0.8	1.5	1.2	2.2	1.7	2.4	0.3	0.2	0.7	3.3	8.1	4.3	15	6.9	4.5	6.4	5.4	3.6	8	10.2	11.1	3.8	4.6	9.6	7.6	13.4	10.5
chrV	15997758	16000633	C06C6.5	9.2	7.1	10.8	11.6	2	1.8	2.8	2.7	2.7	2.2	6	4.9	7	8.8	8.4	1.2	0	3.5	2.5	4.7	2.1	5.8	4.5	6.6	0.3	0.7	3.1	8.7	17.5	8.9	16.6	9.6	8.5	8.1	9.6	7.3	12.5	12.4	17.4	8.5	7.9	29.2	12.6	25.3	23.2
chrV	15988733	15991587	C06C6.6	0	0	0	0	0.1	0	0.2	0.1	0.1	0.2	0	0	0	0	0	0	0	0	0.1	0.2	0.1	1.7	1.4	1.7	0	0	0	1.4	0	0	0	0	0	0	0	0	0	0	0	0	0	0	0	0.1	0.1
chrV	15992185	15995587	C06C6.7	0.1	0	0	0	0.8	0.3	1.2	0.4	0.5	0.3	0	0	0	0	0	0	0	0	0.4	0.9	0.4	8.2	6.4	7.2	0.1	0.1	0.2	10.3	0	0	0.1	0.2	0	0.1	0	0.1	0	0	0	0	0	0	0	0.1	0.1
chrV	15997115	15997750	C06C6.8	1.1	2	0.5	1.5	6.4	2	7.9	2.7	3.2	4	0	0.4	0	0.2	0.4	0.9	0	0.6	4.9	7.6	3.2	48.6	46.3	60.8	0	0	3.6	50	1	0.4	5.1	5.2	0.4	0.6	0.3	1.1	0.9	0.5	0	0.4	0.1	0.5	0.5	4.3	4.3
chrV	15996193	15996725	C06C6.9	0	0	0	0	0.4	0.4	2.4	1.1	0	0.4	0	0.7	0	0.3	0	0	0	0	0.4	0.8	0.8	9.9	11.4	9.5	0	0	0	17.5	0	0	1	0	0	0	0	0	0	0	1	0.3	0	0	0	0	1.1
chrIII	8605751	8606424	C06E1.1	8	3.4	6.7	7.1	9.6	10.3	7.1	12.6	9.9	12.4	7.6	4.2	5.4	6.6	6.8	298.4	359.2	4.3	4.6	3.8	5.9	80	78.4	71.3	296.1	323.4	5.6	116.6	16.2	3.3	207	3.9	12.8	7.3	12.1	236.8	253.2	230.8	181.8	370.3	5.2	8.4	4.7	186.3	222.9
chrIII	8609796	8614489	C06E1.10	13	6.6	16	7.2	10.1	9.4	9.3	11.1	9.1	11.6	11.4	11.9	10.5	10.6	8.2	12.3	11.2	9.6	7.4	6.4	8.5	6.7	5.8	5.6	12	12.9	6.6	8.2	6.2	13.2	11.5	9.9	8.7	8.5	7	11.7	9.7	13.5	11.6	13.4	13.7	8.2	10.8	10.8	11.6
chrIII	8614681	8616244	C06E1.11	0.7	0.9	0.1	0.1	0.5	0.3	0.5	0.6	0.8	1	0.3	0.8	0.1	0.2	0.2	0.4	0.5	0.2	0.8	0.6	0.4	1.1	1	0.7	0.3	0.3	0.5	0.5	0.3	0.4	0.4	0.6	0	0.2	0.4	0.7	0.5	0.4	0.4	0.8	0.4	0	0.2	0.3	0.4
chrIII	8581021	8583849	C06E1.3	30.4	10.3	41.3	4.7	4.9	2.5	5.5	2.7	3.1	3.4	5.7	5.3	6.4	6.5	5.1	0.6	0.6	3.9	3.1	5.5	3.1	2.9	2.4	3.3	0.3	0.4	2.1	5.4	4.3	3.1	6.6	8.4	5.5	7	4.2	6.6	12	11.6	19.3	2.7	6.4	11.3	13.4	9.8	6.7
chrIII	8584105	8588535	C06E1.4	1.5	1.1	2.3	1.3	0.2	0	0.3	0.2	0.1	0.1	1	1	0.8	2	1.2	0	0.1	1	0.2	0.2	0	0.5	0.5	0.4	0	0.1	0.1	0.8	1.2	1.4	3.2	1.3	1.2	1.3	1.1	4.4	4.5	7.8	9.1	1.2	2.7	1.9	1.4	5.3	2.9
chrIII	8589216	8589462	C06E1.5	2.3	2.4	1.1	0	0	0	0	0	0	0	0	0	0	0.7	0	0	0	0.8	0	1.6	0.9	737.2	1181.8	1483	0	0	0	2293.3	0	0	0	0	1.8	1.3	1.3	1.5	0	1.1	2.2	0	0	0	0	0.8	0
chrIII	8590752	8590902	C06E1.6	0	8.5	8	8.9	10.8	0	6	7	5.4	5.2	0	0	0	0	3.1	0	0	0	0	9.5	49.7	2267.5	4639.7	5365.2	0	0	7.8	4864.4	0	0	0	0	0	0	7.6	0	0	0	0	0	0	0	0	0	0
chrIII	8591158	8593012	C06E1.7	0.3	0.2	1.4	0.8	0.7	0.5	0.6	0.3	0.7	0.3	0.6	1	0.1	0.4	0.7	0.2	0	0.6	0.2	1	0.5	4.3	4.1	4.9	0	0	0.4	6.8	0.8	0.1	0.3	1.1	0.4	2.1	1.2	0.2	0.6	0.6	0.9	0.2	0.4	1.7	0.8	0.8	0.6
chrIII	8595287	8597790	C06E1.8	2.9	3.1	6.9	4.6	0.3	0.1	0.2	0.2	0.1	0.2	6.1	3.8	9.8	8.1	10.5	0.3	0.6	2.4	0.1	0.2	0.1	0.2	0.2	0	0.2	0.2	0.4	0.4	6.2	7.9	16.9	7.3	7.1	5.6	6.4	15.5	19.1	20.7	17.9	27.3	16.5	8.7	5.1	27.4	18
chrIII	8606427	8609703	C06E1.9	10.2	9.4	15.1	8.8	17.6	17.5	16.3	18.8	17.8	22.3	10.5	12.6	13.1	9.2	9.2	19.5	14.5	6.5	12.9	11	13.4	14.6	15.4	13.1	20	18.3	12.4	15.6	8.8	14.1	13.3	9.7	9.3	9.8	9.4	12.5	8.6	10.8	10.6	11.6	12.2	8.3	9.9	11.8	11.6
chrX	8872880	8874581	C06E2.1	11.7	5.5	11.9	5.9	1.8	1.2	1.7	1.4	1.7	1.2	8.7	9.8	6.8	6.5	5.1	0	0	4.7	1.8	2.2	1.7	2	1.6	2.8	0.1	0.1	2.1	3.9	5.3	1.6	4.2	9.2	6.2	4.5	4.3	4.8	6	7.9	9.3	2	3.9	11	6.6	4.8	4.6
chrX	8879595	8880353	C06E2.2	0	0	0.8	0	0	0	0	0	0	0	0	0	0	0	0.4	0	0	0	0	0	0	0	0	0	0	0	0	0	0	0	0.7	0	0	0	0	0	0	0	0	0	0	0	0	0.6	0.8
chrX	8869571	8871782	C06E2.3	0.5	0.9	1.2	1	0.1	0.1	0.2	0	0.1	0	0.2	0.5	0.3	0.6	1.2	0	0.5	0.6	0.1	0.1	0.1	0	0.6	0.2	0.1	0.5	0	0.2	1.2	0.2	0.7	0	0.4	1	1.3	0.2	0.4	0.4	0.2	0.1	0.3	0.2	1.7	0.4	0.5
chrX	8856997	8857901	C06E2.5	3.5	2.2	5.7	2.7	8.8	11.1	5.1	7.9	9.7	11.4	5.8	3.5	6	3.4	3.1	120	109.1	3.6	11.2	6.7	11.3	1.6	3.3	1.7	111.5	113	7.2	2.5	3.2	94.2	57.2	7.3	3.6	4.5	4.7	84.1	85.3	59.6	54.2	94.3	68.7	2.6	3.6	45.8	60.7
chrX	8867557	8869203	C06E2.7	1.9	2	1.9	0.9	0.4	0.1	0.5	0.5	0.3	0.2	1.2	1.3	1.1	0.9	1.5	1.8	1.5	1.4	0.3	0.6	0.1	0.4	1.2	0.5	1.3	0.7	0.3	0.8	1.4	0.4	1.6	0	1	0.9	1	0.5	1	0.4	2.3	0.8	0.8	0.9	1.6	1.6	1
chrX	8866184	8866587	C06E2.8	3.2	1.3	5.1	11.6	0.3	1.2	2.6	0	0.3	1.3	8.7	9.6	7	2.7	3.5	0	0	12	0.6	2.1	0.6	0	0.4	0.3	0	0	1	0.9	8.5	0	0.4	0	7.7	4.5	1.9	0	0	0	0	0.3	0	2.4	4.8	0	0
chrX	8861204	8861597	C06E2.9	0	0	0	0	0	0	0.7	3.1	0	0	0	1	0	0	0	0	0	0	0	1.6	1.1	493.1	494.9	733.6	2.9	2.3	0	916.8	0	2.8	0	0	0	0	0	1	2.3	0.7	0	4.2	0	1.4	0	4.6	3.8
chrIV	7283245	7283860	C06E4.1	0	0	0	0	0.1	0.1	0.2	0	0	0	0	0	0	0	0	0	0	0	0	0	0	0	0	0	0	0	0	0.1	0	0.1	0	0	0	0	0	0.5	0	0	0	0	0	0	0	0	0
chrIV	7276871	7283075	C06E4.2	11	15.9	10.2	23.8	8.4	2.3	6.4	4.8	3.3	4.2	16.8	15.2	24.1	32	30.1	0	0	10.1	2.7	10.9	3.1	5.9	10.3	7.5	0.7	0.7	4.9	10.4	34.6	51.8	53	24.7	33.6	34.6	40.1	99	207.4	104.1	118.8	118.8	90.4	39.2	34.9	114.6	83.9
chrIV	7260873	7262017	C06E4.3	0.4	0.9	1	1.1	0.8	0.3	0.9	0.4	0.2	0.3	2.7	1	1.5	0.7	1.1	0	0	0.4	0.2	0.3	0.5	0.2	0.8	0.4	0	0.1	0.7	1.2	1.4	0	0.5	0.4	0.1	1	1.5	0	0.1	0.1	0.2	0.1	0.3	0.2	0.5	0.5	0.3
chrIV	7258641	7259526	C06E4.4	0	0.2	0	0	0	0	0	0	0	0	0	0	0	0	0	0	0	0	0	0	0	0	0	0	0	0	0	0	0	0	0	0	0	0	0	0	0	0	0	0	0	0	0	0	0
chrIV	7254978	7256253	C06E4.5	0	0	0	0	0	0	0.1	0	0	0	0	0.2	0	0	0	0	1	0	0	0	0	0.1	0	0	0	0.1	0	0	0	0	0	0	0	0	0	0	0	0	0	0	0.1	0	0	0	0
chrIV	7257205	7258237	C06E4.6	0.2	0.1	0	0.1	0.1	0	0.1	0	0.2	0.2	0.1	0	0.2	0.3	0.3	0.3	0.4	0.1	0	0.1	0.1	0.1	0.3	0.4	0.1	0.1	0.2	0.1	0	0	0.3	0	0	0	0.2	0.5	0	0.2	0.2	0.2	0.1	0.2	0.4	0.7	0.5
chrIV	7262225	7263225	C06E4.7	0.2	1.8	1.1	3.6	0.1	0.3	0.5	0.8	0.2	0.4	1.4	2.1	1.6	3.5	3.2	0	0	2.3	0	0.5	0.4	1.5	1	1.7	0	0	0.3	1.4	3.4	0.5	1.5	1.8	1.6	2.3	2.7	1.4	2.7	3	5.8	0.5	0.4	2.2	2.8	2.4	1.6
chrIV	7284207	7285509	C06E4.8	0.2	1.4	0.4	0.6	0.7	0.4	1.3	0.3	0.3	0.3	0.6	0.3	0	0.7	0.2	0	0	0.1	0.2	0.6	0.3	0.5	0.4	1.4	0.2	0.1	0	1	1.4	0	0.7	0.4	0.5	1.2	1.2	0.1	0	0.1	0.2	0.1	0.1	0.4	0	0.7	0.7
chrIV	5848643	5850838	C06E7.1	194.2	72.1	194.6	107.1	94.1	99.1	101.7	94.9	107.5	97.6	145.3	137.3	105.3	96.9	83	79.4	75.2	86.5	74.1	82.7	83.1	48.8	44	50.8	80.2	75.9	74.5	64.3	83.9	71.5	43	78.3	77	85.6	88.2	116.5	104.3	99.1	123.6	52.5	73.1	113.8	140	46	48.5
chrIV	5839387	5843992	C06E7.2	11.2	8.7	13.5	13.7	4.2	2.7	5.1	3.6	3.3	4.2	8.6	9.8	9.3	19.9	12.6	0.3	0.6	5	2.8	5.8	3.1	10.4	11.7	8	0.6	1	2.6	12.6	10.7	2.7	10.3	8.5	9.5	10.6	11.4	5.7	9.2	12	12.2	5.3	6.9	7.5	12.9	11.1	7.1
chrIV	5843970	5846387	C06E7.3	88	44.3	72.8	84.9	68.8	77.2	80.7	76.6	80.9	80.6	100.1	104.2	57.9	61.9	47.5	68.2	71.2	72.6	58.5	76.7	68.2	90.8	76.3	84.6	75.2	67.8	65.6	106.3	58.5	64.2	56.1	58	53.4	57.7	52.8	105	81.3	93.5	107	55.4	71.3	81.2	81.9	57	59
chrIV	5850827	5859965	C06E7.4	91.5	20.8	56.4	79.5	7.6	3.4	7.2	6.7	3.9	8	59.7	58.8	14.1	28.1	14.2	10.8	10.2	54.8	3	10.5	3.5	2.4	3.3	2.8	11.4	10.7	3.1	6.7	42.7	72.6	84.7	58.6	42.1	39.9	20.4	94.3	104.5	149.8	125.9	89.4	123.8	97.7	39.5	141.1	98.7
chrIV	5864517	5865891	C06E7.6	0	0	0	0	1.1	0.9	2.7	0.9	0.7	0.6	0.4	0	0	0	0	0.9	0	0	0.4	1.5	1	9.4	11.8	12	0	0	0	15.5	0	0	0.7	0	0	0	0	0	0	0.5	0.5	0.3	1	0	0	0.2	0
chrIV	5867677	5870161	C06E7.7	0	0	0	0	0	0	0	0	0	0	0	0	0	0	0	0	0	0	0	0	0	0	0.1	0	0	0	0	0	0	0.1	0	0.3	0	0	0	0	0	0	0	0	0	0	0	0	0
chrIV	5865846	5867361	C06E7.88	2.5	8.1	3.1	3.1	0.6	0.1	0.7	0.4	0.1	0.2	2.9	3.7	0.4	0.8	1.3	0	0	0.1	0.1	0.3	0	0.1	0.3	0	0.1	0	0	0.8	5.7	34.7	52.4	0	2.5	1.5	0.7	74.7	94.9	106.7	78.1	36.4	71.4	0	0.4	69.8	57
chrIII	6990115	7002255	C06E8.3	29.4	34.4	39.5	26.5	12.4	7.5	15.4	11.2	8.7	10.6	26.6	25.9	24.6	34.3	19.9	6.4	4.5	16.4	9.1	16.2	11.4	27	22.3	18.4	5.8	4.9	12.2	33.9	38.6	6.1	11	32.8	17.8	14.9	19.3	8.1	9.7	9.6	12.4	5.3	7.4	13.3	14	9.7	7.9
chrIII	7002244	7005307	C06E8.5	22.9	18.7	29.6	1.3	3.3	0.6	4.2	2.1	2	3.3	2.7	2.3	7.8	5.3	1.6	0.1	0.2	2.7	0.7	7.3	0.9	0.5	0.5	0.5	0.3	0.2	0.5	0.3	3.2	2.2	4.8	8	4.4	6.7	3.3	0.7	6.2	4.4	16.6	0.5	2.4	15.9	5.5	4.1	3
chrX	16633289	16637560	C06G1.1	103.4	29.5	60.8	56	5.9	1.9	9.7	9.1	3.9	6.9	47.3	44.4	15.3	24	14.7	1.1	0.9	43.8	1.9	10.9	1.9	1.2	1.1	0.6	1.2	1	1.8	0.9	53.6	22.5	27.4	65.1	64.3	44.8	24.5	39.3	50.7	55.1	62.5	16.1	57.1	94.5	57.7	39.6	27.1
chrX	16621737	16622666	C06G1.2	11.9	2.6	4.5	34.9	3.1	0.8	2	3.1	0.6	1.4	27.3	21.4	1.7	6.9	1.4	0.3	0.8	21.5	0.8	6	0.9	0.2	0.3	0.2	0.3	0.2	0.7	0.5	21.7	18.7	15.6	16.6	15.7	12.2	7.9	55.4	76.3	78.7	92.5	12.7	57.4	21.6	22.5	31.7	24.6
chrX	16613375	16617594	C06G1.4	73.3	78.6	90.5	67.6	25.3	25.1	26.9	28.9	23.5	28	56.5	54.2	56.4	76.2	67.7	114.3	136.3	53	21.2	25.6	24.9	34.2	36.5	28.5	119.7	127.6	23.8	37.5	84.2	427.9	210.9	89.9	94.4	67.6	77.6	348.8	287.9	279.4	279.3	338.3	493.1	88.4	149.5	321.3	269.2
chrX	16638171	16642988	C06G1.5	24.8	9.4	18.9	14.7	4.7	3.3	4.4	3.5	4.7	3.6	15	15	11.1	14.4	14.6	1	0.5	14.6	3.4	5.6	3.5	4.6	5.2	4	1.2	0.9	2.9	6.2	19.2	18.4	20	21.7	26.1	16.3	17.6	30.1	33.4	35.2	38.2	19.3	36	23.1	39.6	29.9	21
chrX	16652031	16654410	C06G1.6	15.8	8.3	12.7	18.2	3.5	3.7	3.9	2.8	5.3	2.9	17.2	15.4	18.1	18.2	23.6	0.5	0.4	20.6	3.7	8.3	4.6	3.2	4.4	3.4	0.5	0.5	3.6	5.2	18.3	19.9	19.4	22.8	28.9	20.3	22.1	30.4	37.9	39.2	35.4	26.5	42.9	23	49.7	30.2	27.2
chrIV	7050090	7053424	C06G3.1	30.4	32.9	26.5	32.1	11.6	5.1	12.4	10.9	4.5	12.9	33.7	28.4	22.1	35.5	23.2	9.1	8.6	19.2	7.5	9.3	7.6	7	25.1	12.8	9.9	7.7	8.8	12.7	32.1	14.8	25.2	26.9	39.1	30.9	38.9	16.2	17.7	25.4	22.8	12.9	14.3	18.7	15.5	18.3	14.1
chrIV	7034390	7039569	C06G3.10	7.6	5.9	10.4	7	20.1	17.9	16.8	20.6	18.6	22.6	11.6	11.9	7.6	6.8	7.1	8.3	9.7	5.8	13.7	11.5	13.2	13.6	14.1	12.1	9.7	9.8	13.3	17.7	9.4	16.5	14.1	7.1	8.6	9	8.4	13.5	14	17.6	14.6	13.4	15.2	7.5	5.1	13.6	12.2
chrIV	7043923	7044593	C06G3.11	30.8	89.2	38.9	218.6	239.1	219.2	199.5	160.5	176.4	242	197.6	196.3	240.7	130.8	240	114.2	98.9	291.4	255.1	263.3	203.9	125.9	120.1	140.8	110.8	95.2	207.1	128.8	170.6	159.3	143.5	100.2	209.1	258.7	300.3	248.2	351.2	88.9	124.2	208.8	132.1	101.9	161.2	133.2	130.3
chrIV	7040197	7043683	C06G3.2	12.4	5	13.2	9.9	62.6	64	57.9	61.8	60.8	61	11.8	12.2	10.8	6.7	6.2	64.5	54.2	6.6	62	54.2	59.1	15.5	16.7	14.1	65.6	58.2	57.6	12.2	7.4	47.5	32.1	7.7	7.8	8.1	6.9	27.4	17.8	20	23	41	34.2	9.8	8.5	24.9	30.7
chrIV	7036111	7036458	C06G3.3	0	28.2	5.3	3.7	15	7.2	9.3	7.9	3.3	3.8	6.3	0.9	0.8	36.4	1.6	0	0	0	2.5	9.8	6.2	4.1	9.8	0.9	0	0	5.6	12.2	2.6	1	5.6	9.5	4.3	6	9.4	1.8	5.4	2	2.6	0	0	0	1.8	6.7	4.9
chrIV	7028446	7030992	C06G3.4	0.1	0	0	0	0	0	0	0	0	0	0	0	0	0	0	0	0	0	0	0	0	0.1	0	0	0	0	0	0	0	0	0	0.6	0	0	0	0	0	0	0	0	0.1	0.1	0	0	0.1
chrIV	7024199	7028135	C06G3.5	47.5	111.5	77.9	54.3	36.9	28.7	37.5	30.5	31.2	35.2	70.3	65.8	76.7	78.6	59.3	9.9	9.9	44.6	25.8	38.8	26.4	70.1	59	43.4	8.4	10.5	24.6	73.4	67.9	52.7	74.8	74.4	54.3	53.4	68.6	55.5	65.5	78.4	70.4	46.4	78.1	45.3	71.3	80.5	66.2
chrIV	7017614	7020191	C06G3.6	13.5	21.1	19.9	14.7	5.2	4.9	5.6	6.6	3.8	7.7	11.6	11.9	10.3	13.2	8.2	33.1	29.4	6.3	3.7	3.8	3.8	6.7	4.9	4.4	28.2	31	3.7	5.8	16.5	67.6	92	18.7	11.1	9.2	9	67.1	71.6	101.8	90.2	52.4	86.3	17.1	11.9	95.8	74.1
chrIV	7011991	7016569	C06G3.7	58.6	49	61.4	37.6	36.4	29.5	33.2	36.6	30.9	36.6	37.7	41.1	30.4	39	31.4	33.2	36.5	27.6	23.7	21.8	28.1	42.9	39.9	34.3	35	35.8	24.9	48.2	37.7	44.7	45.8	38.9	36.8	39.9	36.1	44	34.2	43.5	54.1	44.1	42.5	40.5	32.3	46.4	37.1
chrIV	7031279	7032548	C06G3.8	12	5.9	10.8	13.8	29.7	27.5	22.1	24.7	24.5	25.9	21.6	18.5	12.5	12.4	15.3	54	38.3	12.2	20.6	17.5	17	5.9	10.9	7.4	53.9	48.7	16.6	10.6	14.8	30.4	24.7	12.4	16.3	16.5	15.5	31.7	26.2	20.1	18.4	19.4	22.1	8.1	10.5	15.7	19.7
chrIV	7032687	7036850	C06G3.9	25.3	14.7	25.5	24	28.6	26.9	26.7	28.3	25.9	31.4	25.4	25	19.6	20.3	21.7	7.5	9.9	17.4	22.5	21.9	22.4	28.3	28.3	24.8	8	9.1	20.8	32.3	19.8	26.5	22.7	17.7	21.7	22.1	22	26.4	25	34.1	33.3	29.9	29.3	25.5	18.3	30	23
chrIII	7987063	7990484	C06G4.1	3	1.7	3.9	2	16.1	15.6	14.2	17.2	16.2	18.6	3.8	4.1	3.7	2	1.6	19.2	18.7	1.1	12.3	9	13.6	15.2	15.5	15.2	18.5	16.8	11.2	20.1	1.7	13.1	11.7	2.3	2.1	2.9	2.1	12.4	7.9	10.3	13.1	13.4	12.7	1.4	2.1	7.9	8.5
chrIII	7981001	7986272	C06G4.2	193.9	265.5	245.8	96.9	83.1	71.8	92.1	78.2	70.9	73.4	105.1	100.1	127	177.7	125.4	101.6	94.2	79.5	81.7	97.1	84.5	112.7	106.6	90.9	110.1	102.8	87.3	99.5	113.9	61.5	76.7	117.1	105.1	105.3	127.7	59.4	59.5	57.7	81.2	61.6	52.1	136.4	166	73.7	71.5
chrIII	7977150	7979695	C06G4.4	0.4	0.5	0.5	0.3	5.7	1.4	6.6	4.5	2.6	2.9	0.6	0	0.8	0	0.2	0	0	0	2.1	5.5	3.7	72.5	62	69.8	0	0	1.3	70	0.4	0.2	1	0	0	0.3	0	0	0.4	0	0	0	0.2	0	0	0	0.5
chrIII	7990723	7996383	C06G4.5	0.9	1.4	0.7	0.7	0.9	1.1	1.4	0.8	0.5	0.9	1.1	1.1	0.4	1.9	0.9	2.3	1.7	0.3	0.3	0.4	0.4	2.2	1.7	1.8	1.7	1.7	0.5	2.7	1.5	1	1.4	1.9	1.1	0.7	1.6	1.1	1.3	1.2	2	0.9	0.8	2.1	1.8	1.6	1.2
chrIII	8004331	8005770	C06G4.6	1.7	1.7	1.7	0	0.5	0.1	1	1	0.5	0.8	0.2	0.4	0	0.1	0	0	0	0	0.2	1	0.1	0	0	0	0	0	0.2	0	0.3	0.2	0.1	0	0.5	0.2	0.2	0.8	1.4	0.7	1.2	0.3	0.2	1.7	0.1	1	0.5
chrIV	10778965	10780691	C06G8.1	26.9	8.4	10.9	36.2	13.3	4.3	16	5.5	2.9	5.2	6.7	5	7.4	35.3	27.6	5.6	6.5	18.6	10.5	18.5	12.9	44.2	54.2	72.3	5	6.4	11.6	25.1	7.5	12.6	7.5	14.9	22.5	26.3	22.9	7.6	8.2	10.8	12.6	5.1	11.5	79.9	28.2	10.7	11.8
chrIV	10790577	10794544	C06G8.2	13.2	8.2	14.6	7.1	12.4	9	13.4	10.2	11.1	11	6.7	6.2	6.5	7.9	4.1	0	0	3.9	6.9	8.2	8.3	5.6	6	5.8	0	0	7.1	9.8	6.7	1.2	4.5	8	6.1	6.9	5.8	3.4	3.9	7.3	7.5	1.6	2.5	16.3	7.8	4.9	3.4
chrIV	10799633	10802229	C06G8.3	37.1	21.2	38.3	31.5	15.8	9.8	21.2	17.3	10.2	15.5	37.7	44.3	31.9	17.2	18.5	2.6	3.6	15.3	9.7	14.4	10.4	33.4	28.9	30.1	4.1	3.6	11.1	50.9	38	8.9	9.1	33.4	18.9	18.7	23.2	8.1	8.8	11	12.6	10	8.1	25.1	19.3	12.1	8.3
chrIV	10785069	10786811	C06G8.4	0	0	0	0	0.1	0	0.2	0.2	0	0.1	0	0	0	0	0	0	0	0	0	0.2	0.1	0	0	0.2	0	0	0	0	0	0.1	0.1	0	0	0	0	0	0.1	0	0.2	0	0	0	0.1	0	0.2
chrV	11122742	11123851	C06H2.1	757.5	630	752.3	966.3	679.6	592.5	673.3	602.6	544.7	619	1044	1014.6	1007.1	1114.6	1074.9	793.6	806.5	951.6	568.3	612.3	609.1	992.9	970.4	864.8	823.6	819.9	546.3	952	1050.5	512.1	382.3	1043.5	1144	1123.2	1117.3	601.4	478.2	498.5	532.9	489	436	634.6	723.5	427.5	423.9
chrV	11125203	11127286	C06H2.2	14.4	9.1	18	8.7	12.3	9.8	12	13.3	10.9	14	12.5	12.1	8.7	8.7	8	10	9.3	6.2	7.9	7.1	8.3	21	21.3	21.3	9	8.2	8.4	27.4	9.7	10	11.8	11.4	10.2	10.1	8.7	10	7.9	16.5	12.7	8.8	10.5	8.7	9.9	10.1	8.6
chrV	11127476	11130067	C06H2.3	5.2	4.7	5.7	4.2	9.2	8.1	7.6	6.3	7.5	9.6	6.6	5.2	4.5	4.1	4.9	8.8	6.7	2.6	5.8	4.5	6.6	3.5	2.7	3.2	8.6	7.6	5.1	4.6	4.8	7.8	6.7	5.5	5.7	5.3	5.2	6.7	5.5	7.2	4.4	4.5	6	3.5	4.1	5	6.1
chrV	11141479	11143045	C06H2.4	2.3	3.5	5.6	2.7	2	2.1	1.6	0.8	2.4	1.4	3.2	4.4	5.8	3.2	3.5	1.6	2.8	1.7	1.6	1.5	1.5	1.6	1.2	1.1	2.2	1.9	1.7	3.7	4.5	3.2	2.2	6	3	2.8	3.4	1.7	2.3	3.5	2.3	2.5	3.2	6.9	6.1	4.2	3.3
chrV	11134590	11140305	C06H2.5	4.4	11.9	6.4	6.2	0.4	0.2	1	0.7	0.1	0.6	4	2.3	3.5	7.1	3.7	0	0	3.6	0.3	0.8	0.3	1.6	1.3	1.8	0.4	0.4	0.5	2	5.5	0.5	2.7	2.3	4.1	4.9	4	1.2	3.7	2.5	3.8	0.7	1.9	11.8	6.1	3	2.1
chrV	11124277	11125040	C06H2.6	59.7	58.4	74.7	51.5	106	104.9	106.2	96	104.6	102.5	62.5	61	68	80.3	66.4	134	114	45.1	93.8	106.9	90.4	35.8	49.6	36.5	112.9	114.5	78.8	64.4	77.5	84.8	73.3	65.8	68.3	58.1	80.8	73.2	99.7	91.6	63.9	119.2	80.2	58.8	75.1	75.3	74.2
chrV	11143040	11144732	C06H2.7	0.9	1.8	0.9	2	12.2	15	10.4	15.3	15.2	14.8	1.1	0.8	0.6	1.6	0.7	26.3	24.3	0.5	11	6.2	9.7	11.5	6.6	6.8	26.1	21.4	10.5	11.9	1.4	18.1	15.2	0.8	0.8	0.7	0.7	10.3	7	8.1	8.5	10.3	15.4	1.3	0.7	6	9
chrV	17895280	17896778	C06H5.1	10.8	21.2	14	7.7	4.8	2.5	5.5	3.5	3.6	4	7.2	7.5	4.3	7.4	4.1	0	0.1	1.9	3.1	3.8	3	13.3	10.5	9.2	0	0	2.1	13.2	14.1	1	3.4	10	8	5.3	8.4	0.8	2.5	2.1	2.8	1	2.2	11.5	3.9	3.2	2.2
chrV	17899801	17901887	C06H5.2	7.4	18.3	12.4	6.9	3.7	1.8	3.3	2.4	2.1	3.1	5.8	5.1	3.2	5.9	4	0	0.1	1.3	1.7	3.3	1.6	8.1	6.9	6.7	0	0	1.2	8.7	12.5	0.9	2.7	7.1	5.5	4.8	7.5	0.7	1.6	1.4	1.9	0.7	1.3	6	3.3	2.2	1.8
chrV	17879817	17888958	C06H5.6	10.6	7.8	8.1	14.6	14.7	14.5	14.4	14.6	11.7	14.8	26.1	29.6	19.4	11.9	15.6	0.8	0.2	14.4	10.6	11.1	12.1	12.5	15.7	13.8	0.6	0.8	11.3	20	15.8	4.7	5.5	11.5	13.4	18.1	15.5	9.9	8.6	9.9	9.1	9.1	6.7	9.5	13.4	8.9	6.1
chrV	17910290	17917218	C06H5.7	74.3	79.2	66.2	48.3	19.4	12.5	26.4	15.8	11.4	14.3	30.9	36.9	28.4	36.9	25.1	3.7	5.1	20.9	10.3	16	15	32.8	26.9	24.4	4.8	6.5	14.4	33.1	39.5	11.9	34.3	43.9	33.7	39.9	37.7	19	26	24.7	26.5	15.9	20.1	49	27.3	39.7	27.7
chrV	17919010	17921727	C06H5.8	3.4	1.8	2.8	2.1	2.2	2.4	2.3	1.4	1.5	1.8	3.2	3.5	2.7	2.4	3.1	1.1	1.8	1.7	2.1	1.9	2.9	3.4	2.3	2.8	1.6	1.7	2.1	4	3.1	1.4	3.1	4.6	2.6	4.3	2.1	2	0.9	1.7	0.8	1.1	1.5	3	2.2	1.7	1.6
chrX	4554664	4558829	C07A12.1	5	13.7	8	5.1	2	1.1	1.8	2.7	2.6	2.8	3.6	3.3	8.7	9.1	7.7	2	2	3.6	1.4	2	2.3	6.4	9.1	6.2	1.3	2	2.4	11.8	7.8	39.8	36.6	8.3	6.9	6.4	9.3	31.3	41.7	43.3	44.2	35.4	51.4	7.3	10.2	50.4	44
chrX	4544847	4545390	C07A12.2	8.8	9.4	2.2	56.9	15.5	8.9	28.9	15.6	5.1	11.7	47.3	29	30.9	47.4	37	0	0	34.7	10.7	19.7	11.1	160	153.5	153	0	0	10	191.6	83.1	3.2	13.5	19.6	86.3	77.2	116.4	8.6	10.1	14.1	12.3	6.7	9	72.5	81.3	16.4	17.4
chrX	4532662	4537506	C07A12.3	20.4	46.2	33	15.1	11.4	8.7	8.5	10.3	10.4	9.2	13.8	14.1	15.6	25.8	22.6	12.8	11.9	14.8	7.2	14.5	8.3	14.5	14	9.5	11.7	11	7.1	13	13.3	21.1	23.8	18.7	17.2	16.9	19.9	26	27	26.7	24.8	30.4	23.8	19.8	23	22.6	19.2
chrX	4524158	4526508	C07A12.4	1311.8	619.6	1210	2878.3	681.8	687.3	696.4	643.8	616.4	654.6	2657.4	2542.6	2585.8	1670.1	2935.9	1688.9	2051.3	2224.4	698.8	1122	640	1062	1388.4	1122.5	1715.4	1978.5	628.2	1376	3466.5	3633	2302.5	2385.5	2642.7	3089.3	2928.9	3017.3	2726.8	2142.9	2177.3	3418.1	3630.7	2548.6	1633.2	2965.6	3253.7
chrX	4514070	4516866	C07A12.5	4.2	1.3	4.4	3	5.7	6.5	4.2	5.8	5.3	6.6	3	2.9	1.6	2.4	1.6	52.6	45.7	2.5	3.9	2.2	4.1	1.8	1.7	1.1	51.2	49.5	3.7	1.4	3.4	34.9	27.8	3.9	3	2.2	2.1	25.5	18	27.4	23.4	31.9	30	5.6	2.2	18.5	22.1
chrX	4517714	4521041	C07A12.7	29.7	35.4	33.2	45	18.4	16.4	21.3	17.8	15.8	17.6	34.2	30.5	36.9	33.8	41.9	38.7	38.4	29.6	13.9	22.1	16.3	34.9	29.6	25.2	33.9	36.7	13.6	27.9	46	55.6	88.5	48.5	34.1	38.1	40	65.8	70.4	69.4	73.1	68.6	60.9	32.8	29.4	104.8	87.5
chrX	10167036	10171823	C07A4.1	9.5	7.7	12	3.9	2.7	2	2.6	2.3	2.1	2.7	4.7	5.2	4.2	6.5	4.6	0.4	0.2	4.1	1.7	2.5	1.8	6	4.6	3.6	0.2	0.2	1.8	6.2	5.9	1	3	5.3	5.6	5.9	5.9	3.7	5.6	6.2	6.3	1.5	3.8	7.8	4.9	4.4	3.6
chrX	10172266	10174098	C07A4.2	4	8.7	2.8	2	0.8	0.6	0.8	1.3	0.1	1.6	4.8	4.6	1.3	3.8	0.4	0.2	0.2	1.8	0.3	0.7	0.6	7.7	1.7	2.9	0.1	0	0.4	7.2	1.3	1.1	0.7	1.7	1.2	2	0.6	0.9	1.5	2	2.2	0.7	0.9	4.7	1.7	0.9	1.1
chrX	10174925	10175868	C07A4.3	0.8	1.4	0.6	0.3	2.4	1	2	1.4	1.4	2	0.1	0.3	0.3	0.4	0.1	0	0	0.1	0.6	2.3	0.9	6.1	5.6	4.5	0	0	1.7	6.2	0.2	0	0	0.5	0.3	0.8	0	0	0	0	0	0	0	0	0.1	0	0
chrIII	9723197	9725130	C07A9.1	0	0	0	0	0	0	0	0	0	0	0	0.1	0	0	0	0	0	0	0	0	0	5.2	4.7	6	0	0	0	7.7	0	0.1	0.1	0	0.1	0	0.1	0	0.1	0	0	0.1	0	0	0.1	0.1	0.4
chrIII	9685085	9686642	C07A9.10	0	0.1	0	0	0	0	0	0	0	0	0	0	0	0	0	0	0	0	0	0	0	0	0	0	0	0	0	0.1	0.2	0.2	0.2	0.5	0	0	0	0.8	0.5	0.3	0.7	0.2	0.1	0	0.2	0.3	0.2
chrIII	9715798	9720207	C07A9.11	8.2	2.3	9.3	3.5	4.8	4.5	2.6	4.2	5.1	3.2	8.4	7.4	7.7	7.9	7.6	0	0.1	5.1	2.8	3.2	3.3	1.4	1.5	0.8	0	0	2.8	2	3.2	0.7	1.5	3.8	7.8	6	7.1	1.5	1.9	2.4	3.7	0.4	1.1	3.8	8.3	2.3	1.3
chrIII	9725200	9727455	C07A9.12	2	5	4.1	2.7	1.2	0.2	1.2	1.3	0.5	1	5.1	4.5	3.4	5.4	4.1	0	0	2	0.1	0.9	0.4	2.3	2.3	2.2	0.3	0.2	0.6	3.6	5.7	3.1	11.4	7.7	3.5	3	4	3.9	8.3	11.2	10.1	2.9	4.1	8.5	4.2	10.7	6.6
chrIII	9679613	9681185	C07A9.13	0	0	0	0.1	1.3	0.3	1.3	0.7	0.7	0.9	0	0	0	0.1	0	0	0	0.1	0.7	1.1	1.4	13.2	12.3	17.6	0	0.1	0.8	14.6	0	1.8	0.8	0	0	0	0.1	4.1	3.9	4.7	5.9	1.4	1.4	0	0.1	2.6	1.5
chrIII	9694583	9696433	C07A9.2	23	15.9	23.5	35.3	97.6	111.3	79.1	114.3	97.6	133.8	51	48	30.2	34.5	35.8	273.7	280	31.8	90.9	86.7	98.9	56.5	70.2	51.3	286.2	281.9	83.9	44	33.4	202.3	195.7	51.5	46.6	60.4	53.2	134.4	113.9	130.4	122.3	160.7	157.8	33.1	44.7	147	184.6
chrIII	9699796	9710212	C07A9.3	45	40.2	51.5	38.2	80	81.3	76.7	80.4	80	81.3	40	35.5	36.7	42.9	33.6	295.8	294.5	28.9	66.4	67.7	72.2	52	51	48.8	295.6	293.5	72.2	65.3	37.3	235.1	174.4	38.3	31.1	30.2	31.4	145	115.4	145.7	154.2	247.9	199.1	45.7	42.3	136	172.3
chrIII	9710164	9713844	C07A9.4	2.4	3	3.9	0.6	1	1.4	0.8	0.8	1	1.3	0.9	0.8	0.8	1.1	1	0	0	0.5	0.7	0.6	0.8	0.4	0.8	1	0	0	0.4	1.7	1.2	0.1	0.1	0.9	0.9	1.2	1.3	0	0	0.2	0.1	0	0	0.4	0.7	0.1	0.1
chrIII	9681439	9682745	C07A9.5	0	0	0	0	0	0.1	0.4	0.2	0.1	0.1	0	0.1	0.1	0.1	0	0.3	0	0	0.1	0	0.2	1.8	1.8	1.8	0.1	0.1	0	2.2	0	1.2	1.5	0	0	0.1	0.1	4	3.9	5.1	5.9	0.9	3.3	0.1	0	3	2.2
chrIII	9676244	9678956	C07A9.6	9.4	10.5	16.5	6.1	5.6	4.4	3.6	4.1	4.1	3.6	8.7	10.5	11.8	13.4	13.4	0.1	0.3	4.7	3.9	3.1	4.4	1.6	2.8	2.5	0.4	0.3	3.8	2.1	7.3	6.9	6.4	8.4	9	10.3	11.8	6.8	7.8	10.9	9	6.4	7.5	7.3	10.6	9.2	7.7
chrIII	9690953	9694488	C07A9.7	8.7	5.9	9.2	6.8	25.8	25.5	23.3	27.5	24.8	29	12.3	10.9	8	7.9	7.3	39.5	38.2	4.1	17.1	15.2	19.6	19.6	16.4	15.4	39.8	40.3	16.8	22.4	7.3	37.5	29.9	4.5	6.8	7.2	7.7	27.5	18.2	26.6	23.7	30.9	31.7	8.7	7.4	21.7	27.1
chrIII	9686848	9690169	C07A9.8	2	6.5	2.5	1.9	1.3	0.2	1	0.8	0.2	0.9	1.9	2.1	2.2	2.5	1.6	0	0.2	0.3	0.1	0.4	0.1	0.9	1.1	1.5	0.1	0.1	0.2	2.1	6.4	0.1	0.7	3.2	2.3	2.7	3.4	0.1	0.2	0	0.1	0	0.1	1.9	0.8	0.3	0.4
chrIII	9663207	9667445	C07A9.9	41.5	15.9	68	29.1	8.3	8.2	9.2	18.5	6.3	15.8	41.2	42.6	37.3	22.6	14.5	6	5.6	15.3	4.5	4.6	7.2	28.5	19	16.7	6.7	5.5	7.9	42.4	30.1	15.9	12	50.3	30.2	27.5	33.3	20.2	24.3	22.4	21.9	16.6	13	60.7	52.7	8.8	12
chrX	9516449	9517130	C07B5.2	1.5	1.3	1.5	0	0	0.2	0	0.5	0	0	1.4	0.4	0.9	0.2	0.5	0	0	0	0	0.2	0	0	0	0.3	0.2	0	0	0.1	0	0	0.2	0	0.4	0.3	0.3	0	0	0	0	0	0	0	0	0.2	0
chrX	9522432	9523170	C07B5.3	9.8	16.4	10.2	7.5	1	1.3	1.9	0.4	0.8	0.5	4.1	4	4	13.2	7.9	0	0	2.8	0.9	2.5	0.9	27.3	30.8	32.9	0.2	0	1	40.5	7.4	0.2	2.5	3.8	4.9	6.6	7.1	0.8	1	1.6	1.6	0.1	0.3	18.9	4.6	1.3	0.6
chrX	9529475	9536577	C07B5.4	8.7	14.2	12.7	6.2	4.1	1.5	3.5	2.6	2.3	2	6.9	6.1	7.1	10.1	7.6	0.4	0	5.2	1.7	3.6	1.6	4.9	5.9	3.2	0.3	0.1	1.3	5.4	9.2	6.2	10.4	5.4	6.8	6.1	7.4	9.2	12.8	17.7	17.4	6.9	12.2	8.2	8.1	16.2	10.7
chrX	9539847	9542373	C07B5.5	28.5	50.4	32.9	32.3	47.1	50.6	39	44.3	37.7	48.2	25.2	22.9	12.9	43.7	29.6	57.9	72.9	27.7	43.5	47.3	42.8	34	43	51.8	59.7	72.1	33.5	57.8	47.7	75.4	60.1	65.4	50	50.5	50.9	76.5	64.5	70.2	46.7	105	77.5	55.8	43.7	66	68.2
chrX	9518964	9521429	C07B5.6	0.8	0.7	2.2	0.6	0.6	0.2	0.1	0.7	0.2	0.3	0.7	1.9	0.7	0.8	0.6	0.9	1.1	0.2	0.1	0.6	0.4	0.8	0.5	0.3	0.4	0.8	0.3	0.5	1	2.7	2.6	3.2	0.4	0.6	0.3	1.5	1.9	3.1	2.4	2.1	2.3	0.8	0.9	3.2	3.8
chrX	9536603	9536918	C07B5.8	2.2	3.4	9.2	9	1.8	1.2	1.5	2.4	0	4.4	2.9	3.8	2	5.1	2.4	3.6	2.3	0.8	2	6	4.6	2	10.5	6.3	3.6	2.7	7.2	0.9	0	6	9.7	0	2.6	4.3	7.7	7.5	8.8	0	3.2	4.6	1.2	0	1	6.7	3.4
chrIV	9185048	9186008	C07C7.1	0.8	0	1.1	0.7	0.3	0.1	1.5	0.3	0.2	0.1	0.7	1.2	0.5	2.6	0.8	0	0	0.4	0.1	0.2	0.2	1	0.5	0.5	0.1	0	0	0.7	1.3	0.2	0.8	0	1.3	0.7	1.5	0.4	1.3	1	0.8	0.2	0.4	2.1	1.2	0.8	0.4
chrII	7398966	7400504	C07D10.1	1.3	0.2	2.8	1.9	1	0.8	1	1.1	0.7	1.2	1.4	1	1.3	1.7	1.4	0.2	0	0.8	0.9	0.9	0.8	0.8	1.2	0.6	0.2	0.2	0.6	1	2.1	2.7	3.7	1.9	1.2	1	2.3	8.1	6.4	10.4	8.9	3.2	4.2	1.6	1.1	6.1	5.4
chrII	7394721	7397308	C07D10.2	25.1	26.1	26.3	23.9	51.1	40.7	43	49.9	41.9	51.9	28.8	27	21.3	34.4	22	40.5	44	15.6	33.9	36.2	34.2	27.8	29.5	23.3	41.3	42.5	33.8	39	19.8	44.8	52.2	22.3	22	23.5	26.1	42.6	46.8	70.1	59	54.4	45.8	20.8	19.1	41.6	35.2
chrII	7387118	7389099	C07D10.3	0	0.4	0.6	0.5	0.1	0	0	0	0.1	0.1	0.4	0.2	0.1	0.3	0.1	0	0	0	0	0	0.1	0	0	0	0	0	0.1	0.1	0.4	0	0.3	0	0.1	0.5	0.1	0	0.3	0.3	0.1	0	0.1	0.5	0.4	0.1	0.5
chrII	7400500	7402664	C07D10.4	70	21.9	35.3	16.4	4.5	2.1	4.9	5.5	4	5.7	22	18.6	5.5	9.9	2.4	3.1	4.1	16.6	2.1	4.9	2.2	0.5	1.3	0.9	2.8	3.2	1.5	1.9	12.6	5.7	11.6	21.2	16.5	19.3	7.1	9.2	23.4	24.6	35.4	2.4	10	44.4	15.4	14.6	8.7
chrII	7381394	7383447	C07D10.5	7.5	4.9	7.7	4.6	7.2	7.8	6.1	7.6	6.3	8.4	2.3	2.8	3.3	6	4.7	92.7	109.5	2.9	5.5	4.2	3.9	2	4.9	4.1	91.1	105.6	3.4	6	4.7	190.6	116.8	5.4	4.8	3.9	4.5	109.9	109.5	155.3	116	218.4	172	7.1	5.4	119.9	129.4
chrII	7379133	7379569	C07D10.6	0	0	0	0	0	0	0	0	0	0	0	0	0	0	0	0	0	0	0	0	0	0	0	0	0	0	0	0	0	0	0	0	0	0.5	0	0	0	0	0	0	0	0.8	0	0	0.5
chrX	7344000	7344505	C07D8.5	0	0.6	0	0	0.3	0	0	0	0	0.2	0.8	0	0	0.4	0.3	0	0	0	0	0.7	0	0.4	0	0	0	0	0	0.4	0	0	0	0	0.5	0.7	0.4	0	0	0	0	0	0	0	0.3	0	0
chrX	7341462	7342737	C07D8.6	87.1	124.1	99.5	116.2	196.8	242.1	171.9	236.3	192	261.2	145.2	144.2	175	105.3	132.3	438.1	384.5	122.1	198.9	148.1	197.2	95.2	152	180.2	433.9	405.6	202.7	77.8	116.9	269.2	191.4	147.8	180.7	163.6	141.8	178.6	107.7	103.4	149.1	169.3	131.7	200.5	133.2	98.4	152.2
chrII	10346920	10349947	C07E3.1	12	7	16.2	7.1	23.4	20.7	20.8	25.8	22.8	27.1	11.5	11.6	8.9	7.9	7.8	54.3	54.3	7	18.8	17.5	20.4	13.8	17	15.7	50.8	48.4	20.2	16.2	8.5	36.6	34	6.2	8.9	9	8.8	25.6	19.3	23.5	23.2	35.8	26.5	5.9	8.9	28.1	30.1
chrII	10346336	10346948	C07E3.10	10.8	7.4	4.1	40.8	1.7	0.2	2.4	2	0.6	3.4	48.7	43.9	2.3	12.8	10	0.8	1	26.6	0.5	3.7	0.7	0.3	0	1.5	0.6	0.6	0.3	0.1	23.5	10	20.6	23	16.8	25.7	16.3	24.7	43.7	37.4	30.8	6.8	16.3	39.3	14.2	25.8	31.5
chrII	10339631	10345056	C07E3.2	39.1	22.5	43.6	23	35.6	33.9	34.3	40	36.2	38.8	32	36	27.1	34.6	25.7	58.3	60	25.9	30	28.9	29.9	19.8	18.1	16.7	56.6	53.7	27.7	23.4	17.4	42.5	36.1	27.1	30.7	29	24.2	45.6	32.1	42.6	34.4	37.3	43.4	26.6	37.9	29.5	27.1
chrII	10353572	10357460	C07E3.3	56.6	81.3	77.7	34.7	6	4	11.5	8.7	3.9	6.8	11.4	12.3	9.1	24.6	15.3	0.4	0.2	11.2	6.1	17.1	4.8	47.2	38.1	44.6	0.2	0.2	4.4	47.3	36.2	7.6	27	26.7	15.9	17.3	15	25.5	28.1	28.4	30	16.2	18.6	51.5	18.6	46.2	32.1
chrII	10360810	10362937	C07E3.4	0.2	0.2	0.2	0.3	2.4	0.7	2.4	1.3	0.8	1	0.2	0.2	0.1	0.4	0.3	1.9	1	0.2	1.1	2.7	1.2	32.8	30.6	33.7	1.6	1	1	31.3	0.3	0.2	0.5	0.2	0.2	0.2	0.2	0.6	0.4	0.1	0.1	0.1	0.1	0.5	0.3	0.4	0.3
chrII	10363523	10365649	C07E3.5	1.4	0.2	0.5	1.6	0	0.1	0.1	0	0	0	0.1	1	0.7	2.2	1.3	0	0	1.2	0.1	0.1	0	0.1	0.3	0.3	0	0.1	0.1	0.4	1.1	0.8	2.2	0.8	0.4	0.7	1.1	2.3	2	3.3	3.1	1.4	2.2	2.2	1.1	2.4	1.9
chrII	10367667	10369537	C07E3.6	5.7	4.4	5.7	6.2	9.4	8.7	5.1	8.5	8.6	10.9	5.8	6.1	3.4	7	5.1	34.5	30	4.1	5.1	4.9	5.4	2.2	1.9	1.5	31.9	29.4	5	3	8.1	43.5	50.4	7.7	5.4	3.7	5.8	46.1	42.3	66.7	45.7	40.9	56.3	6.9	5.4	49.3	39.4
chrII	10352044	10353403	C07E3.8	0	0.1	0	0.2	0	0.1	0.1	0.4	0	0.1	0.1	0.1	0.1	0.2	0	0.9	1.8	0	0.1	0	0.1	0	0	0.1	1	1.4	0	0	0.1	0.6	0.3	0	0.2	0.1	0.5	0.7	0.6	0.2	0.6	0.6	0.8	0.4	0.1	0.5	0.6
chrII	10350699	10351557	C07E3.9	3.9	6.6	4.2	10.8	13.7	15.9	16.9	17.9	16.3	20.6	11.6	8.6	7.4	5.6	5.3	5.1	5.2	7.2	11	13.8	11.8	18.5	13.2	16.7	6	6	11	16.8	9.3	8.5	16.1	6.7	7.5	6.9	8.3	11.3	17.3	12.5	9.3	6.4	10.4	6.1	4.9	13.2	9.9
chrI	444001	461610	C07F11.1	17.6	10.4	17.3	14.6	18.1	20.1	13.7	18.9	17.4	22.6	14	14.6	13.4	17.9	18.1	43.7	42.7	13.7	13.5	9.8	13.1	12.6	9.6	7.2	45.7	44.2	13.6	15.8	14	52.6	39.9	15	15.1	16.6	15.6	58.9	45.3	43.1	63.8	36.7	49.7	30.2	21	51.8	44.7
chrI	420924	423721	C07F11.2	2.2	1.7	2.2	1.8	0.6	0.1	0.6	0.5	0.3	0.3	1	0.9	0.8	2.3	1.3	0.5	0.8	1.1	0.5	0.6	0.3	1	0.9	0.9	0.7	1	0.4	1.2	1.1	0.5	1.6	1.3	1.6	1.5	1.8	1.2	1.4	1.4	1.8	0.6	0.5	1.1	2.1	1.5	1
chrIV	8210569	8213709	C07G1.1	3.7	1.1	3	1.3	0.2	0	0.5	0.5	0.1	0.3	1.9	2.6	4.3	2.2	2.1	0.4	0.2	1	0.1	0.1	0.2	0.7	0.3	0.4	0.3	0.5	0.1	0.7	3.5	1	1.6	2.9	3.8	3	3.1	1	1	1.1	1.6	0.5	1.3	4.2	1.9	1.5	0.7
chrIV	8206599	8210921	C07G1.2	2.3	0.9	2.5	0.8	0.2	0.2	0.3	0.3	0.2	0.4	2	1.6	3.5	1.5	1.8	0.1	0	0.9	0.1	0.3	0.2	0.3	0.3	0.3	0.4	0.2	0	0.4	3.3	0.6	1	3.2	2.9	2.7	2.6	0.3	0.7	0.6	1.2	0.3	0.8	2.4	2.4	1.5	0.7
chrIV	8176470	8188866	C07G1.3	27.4	17.3	38.3	18.6	38.2	34.7	31.8	42.1	38.3	41.7	22.1	18.6	17.1	19.5	17.7	74.2	65.3	12.5	29	24.8	27.3	19.1	17.7	15.6	76.3	66.9	25.7	23.1	18.9	60.3	66.6	20.5	16	18.5	17.6	61.5	51.7	66.1	72.8	42.8	64.4	31.9	24.9	63	51.9
chrIV	8188887	8198937	C07G1.4	27.5	12.6	26.7	20.5	37.3	37.7	36.5	38.9	39.5	38.7	21	21.9	19.9	22.6	21.5	44.5	37.6	16.9	35.7	42.1	33.2	31.9	30.7	26.7	45.5	42	33.9	37.2	19.8	42.4	36.4	17.2	17.5	18.6	18.6	59.3	62.3	69.8	67.2	50	47	24.6	24.2	46.6	42
chrIV	8201364	8206034	C07G1.5	58.1	18.7	68.6	38.2	48	43.5	45.5	46.8	46	50.3	34.5	34.2	23	31.3	29.6	53.5	54.7	26.2	37.1	44.2	40.6	64.4	66	68.1	51	51.5	38	78	32.2	51.7	57.3	28.7	27.6	29.5	24.6	44.4	41.9	65.9	62	67.3	61.4	45.4	33	59.3	52.5
chrIV	8209142	8210381	C07G1.6	0	0	0.1	0	11.5	2.7	15.1	6.5	4.9	3.9	0	0	0	0	0	0.4	0	0.1	6.5	14.9	7.7	76.3	74.2	84.2	0.2	0.2	5	111.8	0	0	0.1	0	0	0	0	0	0	0	0	0	0.2	0	0	0.2	0
chrIV	8210891	8211814	C07G1.7	0	0	0	0	0	0.2	0.1	0.1	0.1	0.1	0	0	0	0	0	0	0	0	0.5	0.5	1	0.5	1	0.3	0	0	1.6	0.7	0	0.1	0.2	0	0.2	0.2	0.5	0	0	0	0	0	0	0	0	0	0
chrIV	8200587	8201221	C07G1.8	33.3	19.2	32.7	33.1	44.4	35.9	39.5	44.4	35	51.4	38.2	34.6	24.4	24.6	29.1	107.1	84.5	21.7	28.3	25.9	36.8	39.6	37.1	35	106	100.4	27.5	43.1	32.5	85.6	76.2	26.4	30	43.8	33.5	81.5	88.6	83.6	66.5	63.2	76.4	36.4	25.8	56.5	61.6
chrIII	4489325	4491366	C07G2.1	6.6	8.2	6.1	8.8	1139	1388.1	1073.8	1410.7	1219.3	1473.5	12.8	13.5	12.4	3.1	2.9	41.7	32.2	3	998	697.9	1117.8	29.5	81.7	58.7	36	29.5	1079.8	32.2	11.4	48.9	130.7	11.3	6.9	10.5	7.1	46.6	26.3	20.6	27.2	13.6	21.6	2.6	4.4	29.1	20.8
chrIII	4491595	4499450	C07G2.2	154.1	90.5	170.5	121.3	113.9	111.9	109.4	130.7	113.9	134.7	80.3	86.4	79.7	152.8	101.4	106.5	105.3	77.2	95.6	95.2	88.9	60.6	82.1	65.9	104.9	103.5	91.3	65.2	111.7	176.4	214	88.7	105.7	105.1	113.2	154.2	182.4	201.6	207.5	220.2	164.9	155.4	110.9	169.3	179.5
chrIII	4499159	4508084	C07G2.3	356.3	155	586.5	232.2	242.3	227	229.3	241	237.2	248.9	266.5	257.4	285.9	319.8	268.4	273.9	269.4	222.6	191.4	181.6	182.6	119.7	108.4	87.5	287.6	278.8	175.1	147.9	319.9	208.3	373.6	322.2	320.2	282	288.5	239.5	210.7	235.4	215.4	288.3	208.4	277.1	343.1	292.7	263.9
chrV	3502303	3503074	C07G3.10	0.5	0.5	0	1.5	0	0.2	0.1	0	0	0	0.5	0.7	0.3	3.9	0.2	0	0	0.4	0.1	0.1	0	14.9	14.8	14.3	0	0	0	17.7	0.9	0.2	0.1	1.2	0.4	0.4	1.4	0	0.2	0.1	0	0.2	0.1	0.5	0.2	0.3	0.6
chrV	3523578	3524572	C07G3.2	15.3	14.9	63.6	1.9	1.2	0.8	1.5	0.9	1.6	1	3.4	3.1	13.5	4.6	8.2	0.9	0.6	5.6	1.5	3.9	2.2	2.4	0.4	1.2	0.5	0.6	1.3	0.9	4	0.7	10.4	8.6	3.8	9.1	16	0.8	2.9	3	5	0.5	1.8	11.4	27.8	9.9	5.9
chrV	3518185	3519798	C07G3.3	0.6	0.3	0.6	0.1	0.1	0.1	0	0.7	0.5	0.3	0.4	0.3	0.1	0.3	0.2	0.5	0.3	0.2	0.2	0.1	0	0.4	0.1	0.2	1.2	1	0	0.3	0.1	0.3	0.3	0	0	0	0.3	0	0.2	0.1	0.3	0.1	0	0	0.1	0.2	0.2
chrV	3512677	3514340	C07G3.4	0	0	0	0.1	0.1	0	0	0	0	0	0.1	0	0	0	0	0	0	0	0	0	0	0	0	0	0.3	0.1	0	0	0	0.2	0	0	0	0	0	0	0	0	0	0	0	0	0	0.1	0
chrV	3510174	3512035	C07G3.5	0	0	0	0	0	0	0	0.1	0	0	0	0	0	0.1	0	0	0	0	0	0	0	0	0	0	0.1	0.1	0	0	0	0.1	0.1	0	0	0	0	0	0.1	0	0	0	0	0	0	0	0.1
chrV	3507818	3509248	C07G3.6	0	0	0	0	0.1	0	0.1	0	0.1	0.2	0	0.1	0	0.1	0	0.7	0.9	0	0	0.1	0.1	0	0.1	0	0.9	0.7	0	0.2	0	0.7	1	0	0	0	0	0.2	0.2	0.9	0.3	0.8	0.3	0	0	0.2	0.5
chrV	3493633	3500939	C07G3.8	0.8	0.8	0.2	0.1	0.3	0.2	0.3	0.3	0.2	0.2	0.5	0.3	0.2	0.3	0.3	0	0.2	0.3	0.2	0.2	0.2	0.3	0.1	0.2	0	0	0.1	0.4	0.3	0.2	0.5	0	0.1	0.4	0.4	0.1	0.1	0.2	0.1	0	0.2	0.4	0.5	0.2	0.3
chrV	3503126	3506349	C07G3.9	22	9.4	15.8	10.5	32.7	30.7	33.6	31.1	35.3	31.2	22.4	18.6	28.8	20.3	17.7	16.1	14.6	10.1	31.6	27.3	33	19.9	21.6	23.3	14.4	16.9	30.6	45.7	11.9	12.6	10.7	11.9	10.8	10.9	14.9	8.5	3.4	9	6.4	12.1	10.1	7.9	16.2	7.7	8.8
chrII	9091046	9093634	C07H4.1	7.3	11.8	5.7	3.9	3.7	2	3.6	4.5	2.2	5.3	6.4	5.3	3.8	6.4	3	0	0	0.8	1.8	2.5	1.8	6.5	4.3	6.4	0.1	0.1	3.3	10.6	10.4	1.2	2.6	7.6	5.1	4.7	5.9	1.5	3.2	4.9	8.3	0.5	1.1	5.5	3.6	5.7	4.8
chrII	9094617	9098784	C07H4.2	21	13.3	20.5	15.7	27.3	26.3	25.2	29	25.6	31.3	21.6	19.2	16.8	18.3	16.8	34.5	35.1	11.9	19.1	16.6	20.2	10.7	11.8	9.2	35.3	36.4	19.3	16.6	18.2	38.4	32.4	15.7	17.9	15.7	17.8	27.4	23.2	34.3	32.1	28.3	33.6	17.5	17.1	29.7	29.1
chrIII	7521396	7524770	C07H6.1	8.3	6.2	10	4.2	10.3	8.6	9.3	11	8.3	10.5	7.8	8.5	5.4	5.2	5.8	8.3	6.3	4.2	5.5	5.6	6.3	7.6	6.6	5.6	8.7	7.6	5.9	8.7	5.5	6.5	7.5	6.2	6.8	6.3	6.7	6.5	5.2	8	6.2	5.7	6	8.1	6.4	6.8	5.6
chrIII	7520937	7521398	C07H6.2	23.3	28.9	18.9	37.3	78.8	80.7	69.9	90.1	77.6	94.4	37.5	38	36.2	20.6	25.5	101.5	80.3	23.5	66.5	57.7	72	39.8	35	34.3	107.8	102	53.7	44.1	36.8	99.8	105.3	43.2	45.9	56.8	50.4	96	120	77	66.6	105.9	79.5	33.2	31.8	95.5	90.3
chrIII	7508109	7515214	C07H6.3	25.8	25.9	34	12.5	8.7	5.6	7.9	6.5	7.1	7.3	15.8	16.8	17.7	19.1	17.4	1.4	0.9	11.1	5.5	9.2	5.6	16.4	18.1	15.5	1.4	1.2	5.2	29.9	13.1	7.3	11.1	11.3	14.7	14.4	16.6	12	13.5	16.4	16.5	7.5	13.6	25.7	20	15.2	11.9
chrIII	7499642	7503180	C07H6.4	25.9	14.6	37.1	15.5	33.4	31.9	30.2	35.2	33.2	34.9	19.1	18.8	18.2	18.5	17.5	79.1	69.5	13.3	31.1	27.2	32.9	32.7	32.9	30.4	81.6	75.4	29.1	38.5	13.6	56.6	43	14.5	15.2	17.8	15.9	50.8	32.2	37.8	34	55.2	50.2	15.9	19	41.9	42.9
chrIII	7495201	7497768	C07H6.5	69.1	33.4	74.7	49.1	1161.5	1275.6	1122.9	1136.2	1301.3	1094.4	105.3	95.1	103.4	63.6	60.9	131.1	133.8	37.6	997	1022.9	847.8	152.1	146	134.5	129.6	128.7	848.1	227.7	50	133.4	89.3	48.2	54.9	67.6	53.3	114.3	88.9	103.8	86.7	128.7	115.5	55.2	78.6	67.6	78.1
chrIII	7515156	7518458	C07H6.6	5.3	3.5	5.4	2.9	13.7	17.1	13.7	17.7	16.6	17	5.1	5.4	5	3.5	3.4	6.7	5.5	2.2	12.2	9.5	11.4	4.6	3.8	4	5	5	10.4	6.3	3.4	8.3	7.6	5.3	2.9	4.3	3.5	5.6	4.4	6.1	6.3	7.1	7.2	3.5	4.5	8.6	7.5
chrIII	7528602	7536567	C07H6.7	22	8.1	29	15.9	5.9	4.1	5.4	4.3	3.8	5.5	18	13.7	15.1	27.3	18.6	9.2	9.3	11.3	5	7.4	4.2	4.8	5.6	4	8.6	9.2	4.7	8.9	24.8	25.7	35.7	21.1	20.5	19	19.5	35.6	40.1	51.9	50.6	37.2	40.1	26.8	30.4	45.2	43
chrIII	7518560	7520739	C07H6.8	22.3	10.9	29.1	10.7	24.4	25	21.7	30.7	28.1	25.8	14.2	16	13.4	15.2	16.3	43.8	40.9	11.4	25.8	21.9	23	17	17.8	16	45.1	40.9	23.9	18.4	9.8	29.8	24.8	12.6	12.8	15.8	11.3	33.2	22.6	26	27.7	28	26.6	15	14.7	24.4	27.5
chrIII	7498264	7499525	C07H6.9	0.5	0.1	0.1	0.2	0.6	0.7	0.3	0.4	0.1	0.9	0.5	0.7	0.3	0.1	0.2	0.8	2	0	0.1	0	0.4	3.6	2.7	2	0.6	1.5	0	7	0.5	2.5	2	1.7	0.4	0.3	0.6	1.7	1.8	1.9	1.7	1.6	2.2	0	0	0.9	1.7
chrX	17092643	17094149	C08A9.1	1.1	2.1	1	3.4	4.7	3.4	3.4	1.6	1.8	1.7	2.4	1.9	2.7	3.3	7.4	0.3	0.4	3.4	5.6	9	7.8	11.4	24.4	23.1	0.7	0.6	6.4	14.2	12.6	1.2	4.3	3.7	15	9.4	18.1	1.4	1.3	1.4	0.8	0.8	3.3	2.7	4.7	3.3	3
chrX	17081028	17081970	C08A9.10	0.3	0	0	0	28.9	24.9	28.2	29.6	32	31.4	0	0	0	0	0	0	0.7	0	19.1	16.1	28.5	0	1.4	0.9	0.1	0.7	28	1.4	0	0.9	0	0	0	0.2	0	0	0	0.2	0.3	0	0.6	0	0	0	0.4
chrX	17087807	17093225	C08A9.3	0.1	0	0	0	0	0.1	0.1	0	0	0	0	0	0	0	0	0	0	0	0	0	0	0	0.1	0	0	0.2	0	0	0	0.2	0.1	0	0.1	0	0	0.2	0	0.1	0.1	0	0.2	0.2	0	0.1	0.2
chrX	17094208	17096463	C08A9.6	2.4	2	4.3	3.1	3.7	4.1	3.8	3.6	3.2	4.1	1.8	2.5	2	1.8	2	19.2	20.2	1.7	4	3.1	4.1	2	1	1.1	21	21.1	3.9	2.5	1.3	16.2	13.5	2.7	2.8	2	2.7	7.9	10.4	8.3	11.7	10.4	17.2	3.1	4.7	10.9	9.9
chrX	17099037	17100678	C08A9.7	0	0.1	0.1	0.1	0.6	1.3	0.2	1.7	0.8	1.3	0.1	0.1	0.1	0.1	0.1	57.8	67.4	0.1	0.6	0	0.6	0	0.1	0	58	62.5	0.3	0.1	0.2	37.8	27.7	0	0.2	0.2	0	16.5	10.5	11.7	10.3	17.3	36.9	0.1	0.1	15	21.2
chrX	17102770	17104797	C08A9.8	0.2	0.1	0.4	0.5	0.9	0.8	0.9	0.7	0.9	0.8	0.1	0.3	0.3	0.3	0.2	3.2	2.8	0.2	0.8	0.4	0.6	0.6	0.1	0.1	3.2	2.6	0.7	0.3	0.3	3.2	2.7	0.4	0.1	0.2	0.2	1.8	0.9	0.9	2	2.1	3.4	0.7	0.4	2	2.3
chrX	17106531	17108296	C08A9.9	0	0	0.1	0	0.3	0.5	0.5	0.8	0.5	0.8	0	0.1	0	0	0	0.5	0.3	0	0.6	0.2	0.4	0.1	0	0	0.2	0.1	0.2	0.1	0	0.4	0.2	0.4	0	0	0	0	0	0.1	0	0.2	0.1	0	0	0.1	0.3
chrII	8017628	8020734	C08B11.1	18.7	27.3	19.3	14.1	89.8	92.3	70.4	87	82.7	93	20.5	20.4	17.9	22.8	15.7	69.4	57.7	11.2	65.5	47	65.7	18.7	36.3	19.5	66.9	58.7	61.6	34.6	11.8	42.1	41.5	11.8	16.2	16.6	15.9	37.3	25.6	21.7	32.7	32.9	31.6	19.1	14.9	22.6	22.9
chrII	8020727	8022510	C08B11.2	6.3	4.7	6.2	4	14.1	13.4	11.3	17.2	15	18.3	6	6.3	5.2	4.6	4.1	30.9	32	2.8	9.4	6.3	10.8	7	7	4.6	32.9	30.4	9.9	9.8	5.4	29.9	26.5	4.9	4.1	4.9	4.7	22.2	18.4	22.8	26.8	19.5	27.4	6.7	5.6	17.5	16.9
chrII	8022261	8027707	C08B11.3	21.1	15.7	28.8	15.6	48.9	51.4	44.2	52.5	51.4	55.6	19.1	20.6	18.2	20.3	17.5	174.6	168.2	13.1	43.9	38.4	42.9	20.2	19.3	17.1	174.2	171.5	42.5	26.3	15.7	142.7	96.5	19.6	16.5	16.4	15.5	106.4	77.7	104.9	98.1	159	135.1	24.1	20.8	94.2	117.1
chrII	8028902	8032659	C08B11.4	13.5	11.5	17	7.2	41.9	30	33.3	26.7	31.2	30.8	14.6	14.9	13.7	9	9.6	2.6	1.4	3.3	20.5	25.5	18.6	14.1	15	12.4	1.8	1.4	17.1	22.7	9.5	5.8	6.2	8.9	10.4	10.1	10.7	5.6	4.8	8.9	7.8	5.7	5.5	6.3	9.3	7.2	6.7
chrII	8034292	8035717	C08B11.5	43.7	24	43.1	56.8	83.3	102.1	96.9	93	112	90.3	70.3	63.3	73.9	52.3	63.1	391	350.3	60.8	101.2	145.5	109.2	68.4	62.2	64.9	403.6	383.1	115.2	76.9	49.3	243.8	120.1	43.9	61	59	56.8	177.6	129.1	108.7	90.4	241.2	173.4	70.7	75.5	112.4	188.1
chrII	8035817	8037296	C08B11.6	6.1	5.7	7.3	6.1	18.6	20	15.2	21.8	18.7	24.9	9.8	9.7	7.1	6.4	4.9	66.2	64.6	4.3	13.6	8.5	14.8	10.3	11.8	9.9	64.6	62.6	13.1	13.5	4.6	42.3	29.6	5.8	6.6	7	6.6	29.8	18.4	22.5	24.3	33.9	29.5	6.7	7.2	19.7	23.3
chrII	8038218	8039545	C08B11.7	59.4	19.7	59.1	48	54.9	56.6	54	70.7	59.1	76.7	56.8	61.2	42.4	36.9	41.7	58	64.4	48.9	46.8	38.4	46.7	48.5	45.7	40.9	56.4	60	40.9	53	36.3	57	63.1	39.1	53.3	53.9	49.9	42.3	40.4	48	37.3	42.5	49.5	30.3	32.7	47.3	44.7
chrII	8039953	8041685	C08B11.8	10	3.6	12.5	6.4	20.1	19.5	17.1	21	21.9	21.2	13.5	10.9	10.3	7.4	8.2	18.5	19.4	3.1	13.7	12.6	14.5	8	8.1	7.6	18.6	19.5	13.8	13.7	9.1	19.6	12.3	8.1	10.7	9.5	11.2	10.6	6.8	10.1	9.7	19.7	13	10.4	12.6	9.9	16.1
chrII	8037387	8038115	C08B11.9	31.1	14.4	29.6	23.6	32.5	33.3	30.3	33.6	27.8	43.4	32.2	30.3	22.5	19.9	24.1	80.5	82.9	27.5	28.3	21.4	29.9	33.8	27.3	28.1	66.2	78.8	25.8	32.3	22.5	76.3	48.5	14.5	29	32	34.5	55.2	56.7	53.2	51.8	75.3	60.8	19.5	19.4	40.5	47.7
chrV	10102565	10104921	C08B6.1	24.4	6.5	19.6	13.9	10	6.7	8.5	4	6.2	5.1	22.9	23.8	16.7	12	14.6	0	0	5.7	7	10.4	9.3	7.2	10.7	9.9	0	0	7.8	13.7	13.3	0.7	2.5	9.7	8.9	5.4	12.4	1.7	3.9	3.6	5.6	0.6	1.6	4.7	6.9	3.8	2.4
chrV	10125026	10127512	C08B6.10	16.5	22.3	29.5	10.5	8.4	5.2	7.7	7.4	5.8	8.6	8.8	8.3	13.9	17.2	13.3	1.1	1	8.6	5.6	12.2	6.6	17.4	14	11.2	0.7	0.8	7.5	10.4	11.8	1.2	4.3	11.3	10.1	16.9	17.6	0.9	2.7	2.1	6.2	1.4	1.5	10.1	18.5	3.6	2.2
chrV	10107763	10109873	C08B6.11	4.5	2.8	5.8	2	2.3	1.3	1.7	1.6	1.6	1.3	3.4	3.6	1.9	2.1	2.2	0	0	0.3	0.9	1.4	1.3	1.6	1.6	1.3	0	0	0.6	2.5	4.4	0.4	1.4	0.6	2.4	2.5	2.6	1.2	2.1	3.8	3.9	0.5	0.7	3.7	2	2	1.1
chrV	10119548	10120961	C08B6.12	0.2	0.2	0.2	0	0	0.1	0	0	0	0	0	0	0	0	0	0	0	0	0	0	0	0.1	0	0.1	0	0	0	0.1	0.2	0	0	0	0	0	0.1	0	0	0	0	0	0	0	0.1	0	0
chrV	10121108	10122745	C08B6.13	0	0	0	0	0.1	0	0.2	0	0	0	0.1	0.1	0	0.1	0	0	0.4	0	0	0	0	0.1	0.1	0.1	0.2	0.2	0	0.2	0	0.1	0.2	0	0	0.1	0	0	0	0	0	0	0.1	0	0.1	0.1	0.4
chrV	10100130	10101991	C08B6.14	0	0	0	0	0	0	0	0	0	0	0.1	0	0.1	0.1	0.1	0	0	0	0	0	0	0	0	0	0	0	0	0	0	0	0.1	0	0	0	0.1	0	0	0.1	0	0	0	0	0	0	0.1
chrV	10105686	10106666	C08B6.2	0.3	0.3	0.1	0	0.2	0.2	0.1	0	0.1	0.2	0.2	0	0.2	0.4	0.3	0	0	0.1	0.1	0.2	0.2	0.2	0.4	0.2	0	0	0.3	0	0.3	0	0.1	0.6	0.2	0.1	0.2	0	0.4	0	0.3	0	0	0	0.1	0.3	0
chrV	10109372	10113440	C08B6.3	4.1	4.1	5.5	1.5	3.3	2.3	2	2.3	2.2	2.1	1.9	1.5	1	1.6	2.6	0	0	1.6	1.4	2.8	1.7	3.1	3.6	3.3	0	0	1.5	5.5	2.2	0.9	1.6	1	2.9	3.2	2.8	2.1	1.3	2.8	2.5	0.8	1.2	3.9	3.7	2.4	1.2
chrV	10114739	10117311	C08B6.4	3.8	0.5	1.7	4.7	0.8	0.1	0.8	0.6	0.3	0.3	5.8	6	1.3	3.5	1.8	0	0	3.9	0.2	0.4	0.1	0.1	0.5	0.2	0	0	0.1	0.6	3.8	28.5	36.4	3.9	4.4	3	2.8	36	104.5	122.1	141.4	8.7	36.8	2.3	1.4	89.5	53.2
chrV	10117739	10119663	C08B6.5	0	0	0.1	0	0	0	0	0	0	0	0.1	0.1	0.1	0	0	0	0	0	0	0	0	0	0	0	0	0	0	0	0.1	0.1	0.2	0	0.1	0.1	0.1	0.1	0.3	0.2	0.4	0	0.1	0.6	0	0.3	0.1
chrV	10123612	10124729	C08B6.6	0	0	0	0	0	0.2	0.3	0	0.2	0.1	0	0	0	0	0	0	0	0	0.1	0	0.1	1.9	2.1	1.5	0	0	0.1	2	0	0	0	0	0	0	0	0	0	0	0	0	0	0	0	0	0.1
chrV	10130378	10134125	C08B6.7	25.9	15.7	28.1	19.4	50.1	53	45.2	53.9	54.1	56.3	26.3	26	24.9	21.6	21.3	52.7	48.6	17.3	37.3	35.2	37	21.8	21.8	19.1	53.6	52.8	36	31.3	22.5	64.9	42.5	18.5	22.7	23	21.8	44.5	34.1	47.8	52	57	52.5	25.8	23.6	44.8	47.2
chrV	10134635	10143065	C08B6.8	20.4	11.3	17.3	15.3	32.6	32.3	28.2	38.1	35	46	23.7	21.8	18.8	15	14.1	71.4	75.3	12.4	22.5	19.2	26.5	14.5	12.2	10.4	70.9	70	19.7	18.3	16.1	58.2	52.5	18.9	22.1	27.5	20.9	39.9	38.2	49.9	39.9	29.7	49.2	16.2	16.4	34.5	45
chrV	10127468	10130272	C08B6.9	22.6	13.4	20.5	18	42.5	45.8	38.7	55.6	45.5	59	28.5	28.1	20.8	16.7	19.7	87.8	71.4	19.7	35.7	29.2	37.2	22.9	21.4	19.6	88.6	77.8	32.1	26.6	16.4	51.6	44.8	21.6	18.3	23.3	18.1	44	27.9	35.2	40.6	39.1	37.9	14.2	12.3	28.5	36.3
chrIII	7814316	7817062	C08C3.1	16	35.1	24.5	17.9	2.5	1.2	1.4	2.9	2.4	1.2	6.5	6.7	7.6	19.5	16.1	8.7	6.7	9.6	2.3	4.5	1.3	17.9	15.5	15.8	5.5	5.5	1.4	24.2	6.4	12.8	16.9	10.7	9	10.4	8.5	26.1	27.1	27	29.5	14.9	21.7	42.8	18.9	31.1	18.6
chrIII	7774623	7775962	C08C3.2	2.5	1.9	2.1	1.4	13.6	14.3	12.4	18	15.4	20.7	2.7	3.4	1.6	1.3	1	16.6	15.2	0.5	13.6	9.4	13	10.8	8	6.6	17.6	12.5	9.9	11.7	1.3	8	9.2	2.5	1.7	1.9	1.3	5.2	4.3	4.1	5	4.9	5.5	0.9	0.8	3.7	3.7
chrIII	7776841	7783389	C08C3.3	11.6	9.6	16.3	9.2	3.2	2.2	3.1	2.7	2.5	1.7	10.4	12	10.6	15.2	12.4	1.2	1.2	7.6	1.7	3.6	2	9.8	9.2	7.3	0.9	1.3	1.9	13.1	12.1	11.1	14.7	20.5	15.1	11	12.8	22.3	25.6	27.3	28.4	16.3	18.8	16.3	16.7	25.4	16.4
chrIII	7793377	7795344	C08C3.4	22.5	14.1	20.1	17.1	117.1	145.6	137.2	133.2	135.6	123.9	42	42.3	37.2	15.9	14.9	90.8	86.2	13.7	115.7	111.2	115	91.6	75.5	82	89.2	80.7	103.2	104.9	24.5	53.8	36	22.2	23.6	28.6	22	54.9	30.8	29.8	33.9	42.7	41.3	5.9	14.6	26.5	33.5
chrV	8345738	8349889	C08D8.1	0.3	0.4	0.8	0.2	1.1	0.5	0.5	3.1	0.2	2.4	0.4	0.2	0.3	0.3	0.4	0.5	0.2	0.1	0.1	0.2	0.1	2	3.4	3.8	0.1	0	0.3	3	0.3	0	0.2	0	2.7	0.4	0.2	0.1	0	0	0.1	0	0.2	1.8	0.8	0.2	0.2
chrV	8336637	8340655	C08D8.2	16.5	7	17.6	15	9	3.8	6.5	4.8	4	5.8	14	10.5	12.9	21.5	15.8	0.7	0.3	11.8	4.9	11.2	5.7	12.7	11.7	8.7	0.7	0.3	5.3	14.5	16.6	10.2	22.3	15.1	13.1	15.6	17.4	20.5	28.7	34.8	32.1	18.5	20.3	13.7	13.2	29.2	18.6
chrII	1633811	1634095	C08E3.1	308.6	4072.4	275.1	1074.6	172	151.3	157.1	196.5	56.6	172.1	192	208.4	392.3	2663.7	2233.1	2	0	1046.5	41.7	269.5	13.7	255.2	180	156.7	0.5	0	10.5	709.4	1153.5	5.7	137.2	1419.2	1302.5	1359.2	2568.2	2.6	31.9	18.3	57.7	2	25.5	3893.5	1782.8	93.6	67.7
chrII	1619803	1621268	C08E3.10	2.1	3.5	1.4	1.4	0.9	0.1	0.8	0.5	0.2	0.4	0.7	0.4	0.4	1.4	0.4	0	0	0.4	0.2	1.3	0.2	0.3	0.8	1.4	0	0	0.4	0.8	1.5	0.2	10.1	2.7	1.1	1.2	2.9	0.4	0.4	0.6	0.4	0.7	0.8	2.8	2.7	8.1	5.6
chrII	1621648	1622854	C08E3.11	0	0	0	0	0.2	0	0	0	0	0	0.3	0	0	0	0	0	0	0	0	0	0	0	0	0	0	0	0	0	0	0	0.5	0	0	0.3	0	0	0	0	0	0.2	0	0	0	0.5	0.3
chrII	1623913	1624679	C08E3.12	0	0	0	0	0	0	0	0	0.1	0	0	0	0.1	0	0	0	0	0	0	0	0	0.1	0	0	0	0	0	0	0	0	0	0	0	0	0	0	0	0	0	0	0	0	0.1	0	0.1
chrII	1632000	1633856	C08E3.13	242.7	3694.3	216.8	1002.4	154.4	136	152.1	197	52.4	176.7	185.8	188.8	335.9	2427.1	1699.6	1.5	0	1022.8	41.7	263.5	17.5	287.7	196.9	181.8	0.4	0.5	17.8	699.3	1083.2	6	148.4	1469.2	1277.7	1320	2453.8	3.1	28.6	15.7	51.2	2	31	4544.1	1879.2	112.3	74.1
chrII	1625972	1626890	C08E3.14	0	0	0	0	0	0	0	0	0	0	0	0	0	0	0	0	0	0	0	0	0	2.3	2.2	2.1	0	0	0	2.8	0	0	0	0	0	0	0	0	0	0	0	0	0	0	0	0	0
chrII	1627485	1627890	C08E3.15	2.2	0	0	0	0	0	0	1.1	0	0	0	0	0	0	0	0	0	0	0	0	0	1.3	6.6	3.3	0	0	0	4.1	0	0	5.8	0	0	1.2	0	0	0	0	0	0	0	0	0	2.2	2.2
chrII	1611337	1612517	C08E3.2	0	0	0	0	0	0	0	0	0	0	0.3	0	0	0	0	0	0	0	0	0	0	0	0	0.1	0.5	0.3	0	0	0	0.3	0.5	0.6	0	0	0	0	0.4	0	0	0.1	0	0	0	0.2	0.4
chrII	1604672	1606150	C08E3.3	0	0	0	0	0	0.4	0.1	0.6	0.2	0.4	0.1	0	0	0.1	0	11.2	13.9	0	0.1	0	0.1	0	0	0	13.3	14	0	0.1	0	6.5	8.2	0	0	0	0	6.2	2.9	2.8	2.9	1.8	4.7	0	0	3.9	6.7
chrII	1606596	1607613	C08E3.4	0	0.1	0.1	0	0.1	0	0.3	0.1	0	0.1	0	0	0.1	0.1	0	0	0	0	0.1	0.2	0	1.7	0.9	0.9	0	0	0	0.6	0	0	0.4	0	0.1	0.1	0	0	0	0	0	0	0	0	0	0.3	0.4
chrII	1607881	1609008	C08E3.5	0.6	1.8	2.2	0.1	1.1	0.1	0.6	0.6	0.3	0.3	0.7	0.2	0.8	0.9	0.3	0	0	0	0.2	0.8	0.1	2.3	2.8	3	0	0	0.2	1.9	1.2	0	1.8	2.1	0.4	0.3	1	0	0.2	0.2	0	0	0	1.6	0.8	2.3	1.5
chrII	1609261	1610722	C08E3.6	0.2	0.4	0	0.1	0.2	0.1	0.1	0.2	0.1	0.2	0.2	0.1	0.1	0	0.1	1	1.8	0	0.1	0.2	0	3.7	3.5	4.7	1.5	1.5	0	3	0.9	0.5	32.1	0	0	0	0.1	0.5	0.3	0.1	0.2	0.9	1	0.5	0.6	20.4	12.4
chrII	1612794	1614066	C08E3.7	0	0.1	0	0	0.1	0	0.1	0	0	0	0	0	0	0	0	0	0	0	0	0.2	0	0.7	0.1	0.5	0	0	0	0.9	0	0	0.5	0	0	0.1	0.2	0	0	0	0	0	0	0.3	0.1	0.3	0.4
chrII	1614799	1616470	C08E3.8	0.1	0.7	0	0.1	0	0.1	0.1	0	0	0	0.1	0.1	0.1	0.3	0	0	0	0	0	0.3	0	0.1	0.8	0.5	0	0	0	1.5	0.3	0	1.2	0.5	0.1	0.2	0.9	0	0	0	0	0	0	0.7	0.6	0.8	1.2
chrII	1616918	1619011	C08E3.9	3.2	10.8	6.9	1.5	1.4	0.6	0.8	0.4	0.3	0.6	1.9	1.7	3	3.3	1.7	0.2	0	0.5	0.6	2.7	0.3	0.1	1.3	0.5	0	0	0.2	0.9	2.4	0	2.5	3	1.9	1.9	3.7	0.3	0.2	0.1	0.3	0.2	0.3	2.8	4.3	1.2	0.4
chrV	18361006	18362515	C08E8.1	0	0.9	0.6	0	1	0.2	0.3	1	0	0.4	0	0.8	1.1	3	0.6	0	0	0	0.2	0.4	0.5	0	0	0.2	0	0	0.7	0.5	1	0.7	3.4	0	0	1	2.1	0	1.5	0.9	3.6	0	0.5	1.8	1.4	1.7	1.3
chrV	18339091	18339879	C08E8.10	30.7	9.8	16.9	119.1	21.2	9.7	50.3	43.2	17.7	25.2	40.5	36.3	24.6	24.8	36.9	0	0	40.4	15	25.5	24	74.5	38	41.4	0.4	0	33.2	13.1	41.7	5.7	15.5	31.9	33.3	38.1	32.9	8.6	27.8	15.2	10.3	10.8	10.5	27.3	9	37.4	21.3
chrV	18350992	18352644	C08E8.11	0	0	0	0	0	0	0	0	0	0	0	0	0	0	0	0	0	0	0	0	0	120.5	38.3	77.8	0	0	0.2	189.3	0	0	0.2	0	0	0	0	0	0	0	0	0	0	0	0	0.1	0
chrV	18353481	18355814	C08E8.2	0.1	0	0.1	0	0	0	0	0	0	0.1	0	0	0	0	0	0	0	0	0	0.1	0	0.6	0	0.1	0	0	0.1	0.3	0	0	0.1	0	0	0	0	0	0	0	0	0	0	0	0.1	0.1	0
chrV	18350119	18350527	C08E8.3	1.7	4	1.7	39.9	3.6	1.5	10.7	1.8	0.4	1.7	3.4	7.8	2.1	4	4.1	0	0	1.6	0.3	0.6	1.6	25.1	6.6	1.9	0	0	1.5	3.4	11.4	2.3	75	4	1.4	7.7	8.5	0	1.4	2.5	1.7	3.6	22.8	1.7	1.2	72	58.4
chrV	18371817	18373503	C08E8.4	13.7	15.6	12.8	12.4	4.2	1.1	5.3	2.1	1.3	1.3	6	5.7	3.9	7.3	3.9	0	0	5.6	1.7	3.9	1	13.4	23.7	39.2	0.1	0.1	0.9	7.3	22.1	0.4	41.9	24.5	16.8	12.7	14.9	1.6	1	1.8	1.2	1.2	2.3	28	15.3	50.1	31.2
chrV	18359789	18359960	C08E8.5	0	0	0	5.4	0	2.8	0	0	0	0	0	0	0	0	0	0	0	3	0	0	0	0	0	0	0	0	0	0	0	0	7.3	0	0	4.4	9.2	0	0	3.8	0	0	2.1	0	3.6	0	0
chrV	18367985	18368394	C08E8.6	0	0.4	0.4	1.5	0.3	0.5	0	0.4	0	0	0	1	0.4	0	0.2	0	0	0	0	0	0	0	0	0	0	0	0	0.8	1.4	0	2	0	0.6	1.2	2.1	0.5	0.6	0.3	0.7	0	0	1.4	1.3	0	0.8
chrV	18364829	18365196	C08E8.9	0	0.6	0.6	0.8	0.5	0.8	0	0.6	0	0	0	1.6	0.7	0	0.3	0	0	0	0	0	0	0	0	0	0	0	0	1.3	2.2	0	3.2	0	0.9	2	3.4	0.8	0.9	0.6	1.1	0	0	2.2	2.1	0	1.2
chrII	1797857	1801383	C08F1.1	0	0	0	0	0	0	0	0	0	0	0	0	0	0	0	0	0.4	0	0	0	0	0	0	0	0	0	0	0	0	0	0	0	0	0	0	0.1	0	0	0	0	0	0.2	0	0	0.1
chrII	1785267	1786283	C08F1.10	0	0	0.2	0.7	0.8	2.1	0.5	3.6	1.8	5	0.2	0.1	0.1	1	0	108.3	141.9	0.1	0.6	0	0.1	0.1	0.2	0	107.6	127.6	0.1	0.2	2.4	253.7	193.9	0.4	1.9	0.1	0.7	148.3	143	174.2	143.8	245.7	179.5	0	0.4	163	181.1
chrII	1783281	1784448	C08F1.11	0.2	0	0.1	0	0.1	0.3	0.1	1.2	0.5	0.9	0.1	0.1	0	0	0	11.2	13.6	0	0	0	0	0	0	0	10.6	12.5	0.1	0.1	0.2	46.2	49.7	0.4	0.5	0	0	32.7	45.3	41	42.4	57.6	45.4	0.2	0.5	44	50.6
chrII	1789186	1790223	C08F1.3	0	0	0	0	0.1	0.4	0.1	0.8	0.6	0.8	0	0	0	0.1	0	34.3	38.3	0	0.2	0	0	0	0.1	0.1	34.1	37.7	0.2	0	0.3	26.1	21	0.4	0.3	0.1	0	12.3	7.8	7.6	6.9	12.8	18.7	0	0.1	9.9	11.3
chrII	1767853	1778545	C08F1.4	8.6	10.9	11.1	4.9	4.2	2.4	4	3.8	3	4.4	8.2	8.6	5.9	7.3	5.6	0	0.2	3.9	2.5	3	2.7	3.7	3.1	3.1	0	0	2.2	7.6	7.6	1.1	2.9	9.1	6.9	6.7	9.3	3.1	3.6	4.3	4.8	1.9	3.4	7	5.7	4.7	3.5
chrII	1778777	1782313	C08F1.5	11.8	19.5	18.7	3.3	4.5	3.1	4.2	2.2	2.6	2.5	6	5.3	6.9	6.7	6.7	0.2	0	4.3	2	4.1	2.4	1.8	3.5	3.8	0.1	0.2	1.9	6	3.7	1.9	3.6	4.2	5.3	5.5	7.2	4.1	4.9	6.3	7.5	1.6	3.9	9.3	5.8	4.4	3.6
chrII	1787220	1788193	C08F1.6	0.2	0	0.3	0.1	1	3	0.7	4.1	1.8	4.5	0.2	0	0.1	0.5	0	185.6	218.5	0	1	0.1	0.5	0	0	0.1	181.5	201.7	0.5	0	0.3	175.8	108.3	0	0.4	0.1	0.1	90.5	74	72.4	69.9	141.1	103.6	0	0.2	69.8	105.1
chrII	1804162	1808323	C08F1.8	0.1	0.6	0.2	0.2	0.1	0.1	0.1	0.2	0.1	0.1	0.4	0.4	0.2	0.8	0.4	2.9	2.5	0.3	0.1	0.1	0.1	0.1	0.1	0.1	2.9	3.1	0	0.3	0.6	1.8	3.9	0.5	0.7	0.9	0.6	1.3	1.3	0.7	1.8	1.2	2.3	0.6	0.8	2.5	2.4
chrIV	13623810	13625518	C08F11.1	5.1	2	8.7	12.4	3.6	2.4	3.8	1.4	1.8	2.3	10.3	8.8	12.6	12.6	14.9	0	0	6.7	2.9	4.9	4.2	6	17.3	14.1	0	0	3.1	8.9	19.5	0.3	1	12.6	12.4	11.8	17	0.2	0.8	0.7	0.9	0.2	0.3	13.5	9	1.7	0.9
chrIV	13648012	13649186	C08F11.10	0	0	0	0	9	2.4	13.6	5.1	4.1	5	0	0.3	0	0	0	0.3	0	0	4.6	11.1	7	116.8	112.5	120.6	0.7	0.2	5.2	128	0	0.2	0.1	0	0	0	0.1	0.3	0	0	0	0.1	0	0	0.1	0	0.1
chrIV	13646706	13647634	C08F11.11	0	0	0	1.7	1253.9	983.2	987.3	1077.5	1011.9	1379.3	0.7	0	0	0	0	0	0	0	823.3	868.1	882.5	0.9	29.8	16.2	0	0	745.1	21.9	0.5	0.8	0.7	0	0.4	0.6	0	0	7.4	1.7	0	0.5	0	0.5	0	0.2	1.6
chrIV	13650635	13651487	C08F11.12	0	0	0	0	15.3	18.8	6.9	27	22.3	37.4	0	0	0	0	0	0	0	0	15.8	13.1	9.5	0	1.6	1.1	0	0	6.5	1.2	0	0	0.1	0	0	0	0	0	0	0	0	0.3	0	0	0	0	0.3
chrIV	13607415	13609859	C08F11.13	37.8	42.7	65.5	30.5	11.8	5.6	18.8	13.2	5.1	15	23.5	26.9	24.5	21.8	16	0	0	1.2	6.6	7.6	4.8	54.1	21	22.7	0.1	0.1	4.9	32	57.3	1.9	8.4	41	23.4	41.1	45.2	4.7	5.9	7.7	10.7	4.4	1.7	44.1	14.5	6.4	5.2
chrIV	13649737	13650314	C08F11.17	0	0	0	0	0	0	0	0	0	0	0	0	0	0	0	0	0	0	0	0	0	0	0	0	0	0	0	0	0	0	0	0	0	0	0	0	0	0	0	0	0	0	0	0	0
chrIV	13621806	13623110	C08F11.2	0.1	0	0	0	0	0	0	0	0	0	0.1	0	0	0	0	0	0	0	0	0	0	0.1	0.1	0	0	0	0	0	0	0	0	0	0	0	0	0	0	0	0	0	0	0	0	0.1	0
chrIV	13619483	13621489	C08F11.3	1.1	1.7	0.4	2.3	1.6	0.3	0.7	0.2	0.1	0.1	1.7	1.6	1	2.4	1.2	0.2	0	0.3	0	0.7	0.1	1.9	1.2	1	0.1	0	0	2.1	1.7	0.1	0.5	2.4	2	1.6	3	0	0	0.1	0.1	0	0.1	2.2	1.9	0.3	0.4
chrIV	13626744	13632673	C08F11.4	0	0	0	0	0	0.1	0	0	0	0	0	0.1	0	0	0	0	0	0.1	0	0	0	0	0	0.1	0	0	0	0	0	0	0	0	0	0	0	0	0	0	0	0	0	0.2	0	0	0.3
chrIV	13633414	13635196	C08F11.5	3.1	4.1	5.3	1.4	3.1	1.2	1.9	1.3	1.3	1.4	1.5	1.6	2.1	1.4	1.2	0	0	0.2	1.1	1	1.2	1.5	1.3	1.2	0	0	0.8	0.9	1.7	0.1	5.5	2.7	1.9	1.9	3.7	0.2	0.9	0.5	1.4	0.4	0.3	6.6	2.6	5.4	3.7
chrIV	13637263	13638501	C08F11.7	0	0	0.3	0.4	1.4	1.2	1.4	1.4	1	1.2	0.6	0.9	0.7	0.2	0.4	0	0.4	0.2	1.2	2.2	2.3	2.3	1.7	3.6	0	0	1.1	2.6	0	0	0.7	0.4	0.4	0.2	0.1	0.1	0.1	0.1	0.5	0.3	0.1	0.7	0.1	0.5	0.3
chrIV	13639241	13644377	C08F11.8	67.7	14.5	104.6	80.5	37.6	44.9	42.3	49.1	47.1	55.1	107.8	102.4	65.1	58.3	74.9	0.1	0.2	70.4	29	18.1	52.6	23.5	61.2	115.7	0.1	0	52.9	69.2	26.2	2.5	4.1	37.1	34.7	48.7	32.9	3.1	4.7	8.4	9.1	2.2	6.3	94.2	67.8	17.1	10.3
chrIV	13644438	13645899	C08F11.9	0	0	0	0	0	0	0	0	0	0	0.2	0	0	0	0	0	0	0	0	0	0	0	0	0	0	0	0	0.1	0	0.1	0	0	0	0.1	0	0	0	0.1	0	0	0	0	0	0	0
chrIV	11149832	11150911	C08F8.1	89.6	62.9	89.7	70.5	96.9	86.4	75.5	92.7	71.8	103.6	70.9	67.5	54.5	66.2	69.7	111.8	124.7	60.5	84.1	83	92.7	53.4	70.2	57.8	115.5	120.3	74.8	60	64.1	144.5	157.4	51.5	62.3	79	91.1	149.2	181.1	118.1	101.9	160.3	113.1	43.4	54.5	107.2	132.4
chrIV	11149167	11154314	C08F8.2	12.7	6.2	13.9	10	17.8	18.7	14.9	19.8	17.1	21.8	13.6	14.3	11.6	12.7	11.2	23.9	17.5	8.6	13.9	13.4	13.6	12.6	12.5	12.3	21.8	19	12.7	15.5	9.3	14.2	12.2	9.8	12.3	12.3	12.1	11.8	9.7	10.7	12.1	8.9	12.6	11.7	12.7	8.2	10.3
chrIV	11155007	11156674	C08F8.3	3.2	2.6	3.1	3.6	43.3	49.8	42.5	48.9	47	50.4	6.3	6	6.2	2.6	2.3	123.7	106.7	1.6	35.4	27.7	35.5	12.5	12.2	12.8	118.2	107.5	33.1	14.7	3.5	61.1	36.6	1.4	4.4	4.7	4.3	37.3	15.7	18.9	22	38.5	40.3	0.8	2.4	15.8	30.3
chrIV	11157127	11159471	C08F8.4	0	0	0	0	2	0.5	2.5	1.3	1	1.1	0.1	0.1	0	0	0	2.5	2.8	0	0.6	2.5	1.2	42.1	32.5	37.2	2.8	3.4	0.7	45.8	0	1.4	0.6	0	0	0.1	0	0.5	0	0.4	0.3	0.4	0.8	0	0	0.8	1
chrIV	11159548	11162508	C08F8.5	0.1	0	0	0	0.1	0.1	0	0.2	0.2	0.2	0.1	0	0	0	0	7.5	6.8	0	0	0	0	0	0	0	6.8	6.4	0	0	0.1	4.1	3.5	0	0.1	0	0.1	2.1	0.8	1.9	1.5	1.7	2.7	0	0	2.5	2.3
chrIV	11162764	11164267	C08F8.6	0.1	0	0.1	0.3	12.3	3.4	13.5	6.1	5.8	4.6	0.2	0.4	0	0.1	0.2	4.1	3	0.2	5.9	14.4	6.8	147.2	143.9	167.1	4	3.4	6.5	157.8	0.4	1.4	2.9	0.3	0	0.2	0.1	1.3	0.5	0.4	0.3	0.8	1.2	0	0.2	2.5	2.4
chrIV	11177264	11178057	C08F8.7	9.5	5	12.2	20.1	4.2	1.2	3.8	4.7	1.5	3.3	12.6	9.6	4.8	5.1	4.8	0	0	6.8	1.4	3	1.6	4.9	2.6	2.4	0.2	0.2	2.3	7.2	8.8	2.8	9.5	8.5	10.3	5.6	5.2	10.1	13.1	15.7	11.8	2.5	5.7	17.1	5.9	8.9	7.1
chrIV	11169812	11174764	C08F8.8	2.7	1	2.7	4	0.6	0.5	0.4	0.4	0.6	0.6	3.1	2.9	3.5	4.3	3	4.4	6.2	2.7	0.2	0.6	0.2	0.8	0.3	0.4	5.2	6.7	0.2	1	3.8	15.1	15.4	3.6	3.4	2.4	3.5	20.3	14.6	19.7	18.9	18.3	18.1	3	4.6	17.2	17.8
chrIV	11178056	11178576	C08F8.9	44.9	118.3	32.4	273.2	320	275.7	333.4	287.1	202.7	316.4	253.1	196	215.5	155	263.3	116.8	197.5	169.3	219	240.8	278.1	174	209.1	246.1	103.4	124.5	247.6	137.1	305.4	164.5	205	143.3	324.8	401.2	394.1	196	283.3	82.7	118.4	146.1	81.2	224	221.7	215.4	180.3
chrII	734656	738673	C08G5.1	0	0	0	0	0.1	0	0	0	0	0.1	0	0	0	0	0	0	0	0	0	0.1	0	0.8	0.3	0.8	0	0	0	1.1	0	0	0	0	0	0	0	0	0	0	0	0	0	0	0	0	0.1
chrII	739556	740906	C08G5.2	0	0	0	0	0.4	0	0.5	0.2	0.2	0.3	0	0	0	0	0	0	0.6	0.1	0	0.2	0.2	5.9	6	6.4	0.2	0.3	0.2	8.6	0	0.4	0	0.7	0	0	0.1	0.5	0.2	0.6	0	0.1	0.1	0	0	0.4	0.6
chrII	743105	745135	C08G5.3	0	0.1	0	0	1.2	0.1	1	0.4	0.2	0.3	0	0	0.1	0	0	0.9	0.3	0	0.2	1.4	0.3	3.9	4.6	6.5	0.4	0.6	0.2	6.1	0.1	0.4	0.4	0	0	0	0	0.4	0.1	0.1	0.4	0.1	0.2	0	0	0.2	0.5
chrII	745468	750171	C08G5.4	17.5	33.5	25.6	15	2.5	1.7	2.2	2.6	1.4	2.3	11.1	10.9	13.6	29	15.7	3.1	2.1	10.8	1.7	2.5	1.7	11.7	11.1	7.9	2.4	2.7	1.6	16.1	13.3	3.6	6.2	16.6	12.1	10.9	11	5.2	6.7	10.1	8.4	4.5	5.3	13.4	11.8	7.9	6.8
chrII	756200	764859	C08G5.5	18.2	31.9	12.7	14.6	4.7	3.8	5.1	4.5	4.8	3.4	10.8	13.3	17.1	27.5	23.5	0	0	17.6	3.3	9.8	3.6	8.4	13.8	11.6	0	0.2	3.7	21.3	22.6	11.6	21	20	20.9	19.3	21.6	34.5	46.7	33.1	35.5	23.9	19.2	19.9	21.2	32	24.8
chrII	770559	772124	C08G5.6	0.5	1.7	1.4	0.9	0.2	0.4	0.4	0.3	0.3	0.5	1	0.7	1.8	2.5	1	0	0	1.4	0	0.7	0.2	1.3	0.6	0.4	0.1	0.1	0.2	0.7	1	0	1	1.8	0.6	0.4	1.4	0.9	0.4	1	2.3	0	0.1	2.5	0.6	0.9	0.8
chrII	761588	765324	C08G5.7	0	0.4	0.4	0	0	0	0	0	0	0	0	0.9	0	0	0.2	0	0	0	0	0.2	0	0	0	0	0	0	0.2	0.1	0	0	0	0	0	0	0.8	0	0	0	0	0	0.1	0	0.2	0.3	0
chrIV	7658722	7664151	C08G9.1	17.6	18.2	23.4	30.1	10.6	5.5	12.1	7.8	7	11.6	24.7	24.6	24.7	26.2	20.9	1.3	1.7	16.5	6	11.4	6.9	19.7	17.3	12.3	1.5	1.6	6.3	25.3	30.1	6.4	17.5	26	23.7	25.8	27.5	13.7	24.5	26.7	32.9	6.3	9.1	24.9	23.2	22.3	14.9
chrIV	7664165	7672961	C08G9.2	1.3	0.1	1	2.3	0.2	0.1	0.1	0.1	0.1	0.1	2.4	2.3	2	1.4	1.4	0.4	0.3	1.5	0.1	0.2	0.1	0.1	0	0.1	0.3	0.3	0.1	0.1	1.2	2.7	3	2.2	2.1	1.9	1.4	6	6.1	8.3	7.3	3.6	5	3.1	1.4	5.4	4.1
chrII	9875119	9877949	C08H9.1	1	2.2	2.2	0.5	0.4	0.3	0.5	0.3	0.1	0.3	0.9	1	2.7	1.6	1.2	0	0	0.6	0.2	0.7	0.2	0.9	1.9	1.5	0.1	0	0.2	2.1	1.6	0.3	0.8	1.6	1	1.2	1.3	0.1	0.4	0.6	1.4	0.2	0.4	2	2.2	1.2	0.7
chrII	9853751	9855636	C08H9.10	0	0	0.3	0.1	0.1	0	0	0	0.1	0.1	0.2	0.1	0.1	0.3	0.1	0	0	0	0	0	0	0.1	0.1	0.2	0	0	0.1	0.2	0.1	0	0.2	0	0.2	0.3	0.3	0	0	0	0	0	0	0.3	0	0.1	0
chrII	9858050	9859580	C08H9.11	0.5	0.3	0.7	0.2	0.4	0.2	0	0.1	0.1	0.1	0.2	0.2	0.4	0.6	0.5	0	0	0.1	0.2	0.1	0	0.3	0.2	0.3	0	0	0	0.4	0.3	0	0	0.5	0.6	0.6	0.7	0.1	0	0	0	0	0.1	0.8	0.4	0.1	0
chrII	9855811	9857803	C08H9.12	0.3	0.2	0.3	0.2	0.2	0.2	0.2	0.1	0.1	0	0.3	0.2	0.3	0.5	0.6	0.2	0	0.1	0.1	0.1	0.1	0.2	0.2	0.2	0	0	0	0.4	0.4	0	0.1	0	0.1	0.6	0.5	0	0	0	0	0	0	0.4	0.4	0	0
chrII	9869396	9871113	C08H9.13	0.6	0.2	0.1	0.1	0.6	0.2	0.5	0.1	0	0	0.1	0	0	0.1	0	0	0	0.1	0.2	0.1	0.2	0.6	0.5	0.4	0	0	0.1	1.7	0.1	0	0.4	0.5	0.3	0.1	0.3	0	0	0.2	0.1	0	0.1	0.3	0.3	0.4	0.3
chrII	9870494	9872927	C08H9.14	0	0.1	0	0	0.7	0.4	0.6	0.2	0	0	0.1	0.2	0.1	0.1	0	0	0	0	0.1	0.2	0.3	0.8	1.4	1.7	0	0	0.3	1.7	0	0	0	0	0.1	0	0	0	0	0.1	0	0	0	0.2	0.2	0	0
chrII	9881133	9882473	C08H9.15	21.3	23.3	40.1	19.2	22	23.5	17.8	8.5	17.7	10.2	20.9	17.6	20.5	24.9	23.7	3	1.3	11.6	13.8	16.9	17.1	28.5	12.4	16.4	2.4	2.6	13	14.6	25.3	16.9	17.8	25.4	22.9	27.4	33.7	18.9	31.4	33	29.8	11.3	19.6	35.9	40.6	19.8	16.8
chrII	9892729	9894313	C08H9.16	16.1	8.1	21.5	9.7	41.5	34.4	37.5	38.5	37.1	38.9	14.6	10.8	10.8	12.1	10.2	46.8	52.8	6.3	31.5	27.6	34	32.2	33.2	32.8	50.1	49.6	34.1	31.8	10.4	49.9	47.2	9.7	9	9.2	10.6	28.1	25.2	32.6	24	37.1	41.3	9.5	8.9	30	28.2
chrII	9886478	9891029	C08H9.2	333.9	191.4	420	407.8	351.2	342.3	356.8	385.6	367.3	425	479	502.7	469.1	357.8	462.6	219.3	219.5	338	298.3	329.5	302.3	284.5	256.2	257	221.9	221.3	301.4	353	472.4	461.9	377	395	461.4	440.9	403.3	366.7	335	424.8	408.2	499.6	428.8	411.2	354.7	444.7	436.9
chrII	9882668	9886383	C08H9.3	5.7	2.9	5.5	3.4	13	11.8	12.4	14.6	13.8	12.9	7.8	7.3	6.5	3.9	5	12.8	13.3	3.2	9.3	8.5	9.1	9.5	8.1	8	13.2	13.7	9.4	12	4.3	12.3	7.8	5.5	4.8	6.2	6	9.7	7.4	7.8	9.8	11.9	8.3	4.4	7	7	8.2
chrII	9862371	9866345	C08H9.4	0.3	0.9	1	0.3	0.2	0.2	0.5	0	0.1	0.2	0.9	0.7	1	1.2	0.9	0	0.2	0.3	0.3	0.2	0.1	0.1	0.2	0.3	0.3	0.3	0.1	0.9	1.3	0	0.1	4.7	0.6	1.1	2.3	0.2	0	0	0.2	0	0.2	1.5	0.9	0.1	0
chrII	9866588	9868702	C08H9.5	1.1	1.2	2.2	0.6	0.2	0.1	0.2	0.2	0.2	0.2	1.2	1	2	2.5	1.7	0	0	0.4	0.2	0.2	0.2	0.3	0.3	0.2	0	0	0.2	0.5	1.7	0	0.4	1.9	0.9	1.4	2.1	0	0.1	0.1	0.1	0	0.1	0.5	2.4	0.2	0.1
chrII	9873189	9874462	C08H9.6	0.1	0.1	0.1	0.1	0.1	0	0	0	0	0	0.1	0	0	0.2	0.1	0	0.3	0	0	0	0	0.3	0.4	0.2	0.1	0	0	0.5	0	0.1	0	0	0	0.2	0.2	0	0	0	0	0	0.1	0.2	0.1	0	0.4
chrII	9859724	9861414	C08H9.7	0	0.2	0.4	0.1	0.2	0	0.2	0	0	0	0.3	0.3	0.4	0.7	0.3	0	0	0.1	0.1	0	0	0.2	0.3	0.1	0	0.1	0.3	0.4	0.3	0	0.1	0.2	0.2	0.7	0.6	0	0	0	0.1	0	0.1	0.2	0.2	0.1	0.1
chrX	2673462	2682353	C09B7.1	2.2	1.8	2	2.5	1.4	1.3	1.7	1.5	1.1	1.3	1.4	1.6	1.9	2.9	2.1	0	0.2	2.5	1.4	1.8	1.3	8.4	8.3	8.1	0	0	1.2	16	1.7	0.3	0.7	2.5	1.7	2	2.7	0.8	1.6	1.3	1.8	0.3	0.7	2.1	2.2	1.6	0.7
chrX	2668128	2670584	C09B7.2	23.8	31.8	31	21.6	19.3	10.7	19.8	15.8	12.5	17.3	26.1	19.3	21.7	26.6	20.9	19.1	17	18.2	11.3	11.1	11.1	24	17.9	15.4	14.6	15.9	10.5	27.9	22.8	22.7	29	24.4	19.2	27.6	25	40.5	47.9	51.5	35.7	24.5	33.8	27	24.8	38.2	33.4
chrX	6031433	6034475	C09B8.1	25.6	16.6	34	12.8	6.9	5.6	6.3	4.8	5	5.4	12	13.5	11.7	18.2	12.9	0	0	13.3	4.3	5.1	4.8	9.3	5	5.4	0.1	0	5.7	10.1	12.3	4.7	10.3	16.3	17.9	18.1	20.2	12.3	15.5	23.1	29	3.6	10.1	19.2	20.1	14.9	11.5
chrX	6007167	6011275	C09B8.3	1.7	0.1	1	4.2	0.2	0	0.1	0.3	0.1	0.1	3.9	2.4	2.3	1.6	1.6	0	0	3.2	0.1	0.3	0	0	0	0	0.2	0.1	0.2	0.2	4.8	0.8	1.7	3.6	2.5	2	1.9	3.8	4.2	5.3	5	2.1	2.4	2.4	0.8	2.8	2.2
chrX	6018445	6019901	C09B8.4	6.4	1.7	12.9	6.1	1	0.9	2.4	0.8	2.1	0.8	5.1	4.5	12.1	4.8	2.9	53.8	60.1	2	0.6	1.2	3.4	1.7	1.2	0.9	49.7	58.5	3.7	3.2	8.3	19.6	29.6	3.5	2.7	4.7	7.5	21.9	20.6	16.9	4.6	72.7	13.7	2.7	3	6.7	10.4
chrX	6020830	6022458	C09B8.5	0.2	0.6	0.2	0.1	0.5	0.7	0.7	0.8	0.8	0.7	0	0	0.1	0.3	0.1	26.4	27.2	0	0.6	0.1	0.6	0.2	0	0	25.8	24.8	0.7	0.2	0.5	11.3	12.3	0.6	0.3	0.1	0.1	6.6	4.9	5.7	4.8	5.6	8.2	0	0.2	7.8	6.9
chrX	6034056	6039461	C09B8.6	335.9	254.2	418.3	404.2	323	240.7	345.3	229.9	248	202.9	341.1	300.9	449.5	595.4	640	6.1	4.2	360.8	295.7	518.8	315.2	518.5	589.5	517.1	10.1	8.9	299.7	499	532	133.8	235.3	413.8	406.8	386.3	484.4	288.5	433	400.8	336.6	267.2	252.3	370.9	493.7	369.2	297.3
chrX	6044273	6048575	C09B8.7	24.9	23.8	37.6	27.9	14.6	14.2	13.8	17.6	13.8	17.7	29.5	33.2	28.4	29.3	28.9	84.3	89.1	22.7	13	13.8	14.7	10	11.7	11.6	84.1	78.5	16.1	18.3	28.3	77.6	72.2	19.5	27.9	24.3	29.4	72.7	68.8	81.3	77.6	99.9	71	30.5	29.9	68.5	75.9
chrX	6015456	6017549	C09B8.8	3.9	3.3	4.9	2.2	2.7	1	1.5	2	1.4	1.7	1.1	1.4	1.8	3	1.7	0	0	0.5	2	0.4	0.8	0.5	1.1	1	0	0.2	1.2	1.9	3.9	0.3	2.3	0	0.7	1.2	1.2	1.1	3.6	3	2	0.3	0.9	4.8	2.6	1.6	1.1
chrIV	5037806	5040430	C09B9.1	0.7	2	1.1	1	0.7	0.3	0.1	0.2	0	0.3	1	0.8	0.7	2.4	0.8	0	0.3	0.4	0.2	0.3	0.2	1.1	0.4	0.5	0	0	0.1	1.3	0.4	0	0.3	2	0.2	1.5	0.8	0	0.1	0	0	0	0.2	0.7	1.4	0.3	0.1
chrIV	5029257	5031035	C09B9.2	0	0	0	0	8.9	2.9	12.5	5.9	4.7	4.2	0	0	0	0	0	0.7	0	0	3.5	10.8	6	111.3	111.3	109.1	0.7	0.6	4	115	0	0	0.3	0.3	0	0	0	0	0	0	0.1	0	0	0.1	0	0	0
chrIV	5021179	5029070	C09B9.3	0	0	0	0	0.4	0.1	0.5	0.3	0.1	0.1	0	0	0	0	0	0.3	0	0	0.1	0.7	0.2	10.2	7	7.1	0.2	0.1	0.2	9.3	0	0	0.2	0.3	0	0	0	0.2	0.2	0.5	0.3	0.1	0.1	0	0	0.4	0.2
chrIV	5031559	5033379	C09B9.4	0.2	0	0.2	0.1	8.9	3.1	9.4	5.3	4.5	4.7	0.2	0.1	0.2	0	0.1	0.6	0	0.1	4	9.8	4.5	129.3	107.8	118.7	0.2	0.1	3.3	145.5	0	0	0.1	0	0.1	0.1	0.1	0	0	0.1	0	0	0	0.1	0.2	0	0
chrIV	5055584	5056041	C09B9.6	0	0	0	1	233.9	83	243.5	130.5	106.9	159.6	0.3	0.1	0.4	0.1	0.1	6.9	6.1	1.9	117	228.9	136.9	3415.8	2316.8	3256.9	6.8	3.8	102.6	2701.2	1	1.4	2	0	0	0.5	0.4	0.4	0.1	0.4	0	0.1	0.3	3.7	0.1	0.1	0.2
chrIV	5056964	5059843	C09B9.7	0	0	0	0	0.8	0.2	1.2	0.7	0.4	0.6	0	0	0	0	0	0.2	0.1	0	0.3	0.8	0.3	11.7	14.1	14.2	0.1	0.1	0.3	16.6	0	0	0	0	0	0	0	0.1	0	0	0	0	0	0.1	0	0	0
chrIV	5040917	5045388	C09B9.8	11.2	9	12	13.3	2.4	2.1	2.8	2.2	1.5	1.5	10	10.6	8.8	17.5	11.8	0.4	0	9.9	1.2	2.7	1.9	5.1	5.1	3	0.7	0.7	1.4	5.5	8.9	4.4	9.7	14.9	12.3	11	14	11.8	21	19.8	24.7	3.5	8.2	11	13.2	18.9	13.7
chrX	7925388	7926541	C09C7.1	12.8	5.2	18.1	10.5	2.6	1.1	1.9	1.6	1	1.6	9.6	9	9.4	14.2	7.8	1	0.9	6.8	0.8	1.8	1	2.8	4.2	2.8	1.5	2.4	0.8	7.6	13.9	6.3	40.1	14.5	9.2	5.3	6.6	14.7	13.3	15.5	10.4	24.1	10.3	7.7	7.7	48.3	30.9
chrI	4035745	4090963	C09D1.1	49.2	28.9	50.1	52.5	33	21	32.4	25.5	21.2	26.6	56.3	57.2	59.7	72.9	71.6	0.5	0.5	65.4	27.1	26.1	28.3	39.3	54.5	45.8	0.5	0.5	27.5	47	52.4	15.2	39.6	50.2	52.3	45.9	46.6	30.8	46	50.1	63	20.7	27.9	56.3	56.3	51.6	40.2
chrI	4071800	4072850	C09D1.2	3.5	1.6	2.8	1.6	0.7	0.3	0.9	1.1	0.5	0.9	1.9	2.2	1.7	2	1.4	0	0.4	2.6	0.4	1	0.4	0.8	1.6	1.8	0	0.1	0.9	2.9	2.8	0.4	2.2	2.5	2	1.9	2	0.4	0.7	0.4	0.6	0.4	0.3	2.5	2.2	1.9	1
chrI	5497780	5506518	C09D4.1	8.3	10.9	8.4	8.5	2.9	1.9	4.2	2.6	2.7	3.1	10.5	13.2	9	11.9	7.9	0.2	0.7	5.5	1.7	2.2	2.5	8.8	5.7	6.3	0.7	0.5	2.1	10.3	7.8	2.1	4.2	6.2	8	6.3	8.9	5.4	6.8	8.2	10.7	3	3	4.8	6.8	6.7	4.2
chrI	5491476	5493534	C09D4.2	3.9	13.5	10.7	4.8	12.7	11.5	12.5	11.1	11.1	13.1	5.6	6.5	5	8.4	3.1	6	3.8	2.7	9.9	10.4	9.9	18.6	11.4	11.4	4.8	5	10.3	25.3	5.6	5.8	6.3	2.6	4.1	4.8	4.6	3.3	1.9	2.3	3.5	4.4	3.6	1.8	2.8	4.6	4.5
chrI	5488342	5490629	C09D4.3	0.3	0	0	0	4.3	1.1	5.7	3.8	1.8	3.4	0	0.2	0	0	0	0.6	0.4	0	1.4	3.7	1.7	78.5	67.6	74.9	0.7	0.9	1.7	77.6	0	0.3	2.1	0.2	0.2	0.1	0.1	0.3	0.3	0.6	0.2	0.1	0.2	0	0	0.4	0.5
chrI	5479543	5484646	C09D4.4	14.4	6.5	16.5	8.2	30.1	31.2	26	30.4	30.8	31.7	14.9	15.4	12.8	10.8	11.4	42.7	31.6	7.3	23.7	20.6	24.3	16.6	15.7	14.3	42.3	34.9	21.7	26.9	9.2	29.8	21.8	9.7	11.6	11.5	10.6	17.1	13.4	16.7	17.5	24.1	23.2	7.9	12.7	14.2	17.7
chrI	5484769	5486357	C09D4.5	1994	3734.4	2165.3	3680.3	2153	2726.6	2401.9	2622.6	2461.6	2944.4	3451	4066.8	3797.5	3196.7	3493.3	535.9	643.8	3516.2	2750.9	2902	2730.3	2540.8	2126.2	2292	621	710.1	2604.8	2177.8	4124	957.8	1213	3982.8	4818.2	4395.7	4071.9	1547.8	1830	1121.2	1189.7	1534.7	994.7	2630.3	3249.6	1295.9	1170.9
chrI	5486489	5487153	C09D4.6	0	0	0	0	0	0	0	0	0	0	0	0	0	0	0	0	0	0	0	0	0	0.7	0.4	0.3	0	0	0	0.7	0	0	0	0	0	0	0	0.2	0	0.1	0	0	0	0	0	0	0
chrII	10968325	11012333	C09D8.1	27.7	29.5	30	24.9	11.8	11.5	11.6	12.3	10.8	13.6	21.7	21.3	22	28.1	22.3	39	34.8	19.2	9.6	9.7	9.7	11.1	10	9.6	39.2	38	9.8	16.7	21.1	60.5	66	20.6	19.8	20	18.4	68.8	72.9	70.8	86.8	51.7	69.8	37.3	25.8	82.1	65.1
chrX	984617	991232	C09E10.2	13.9	15.1	17.1	9.7	2.2	0.9	2.1	1.4	1.7	1.9	8.7	8.4	9	13.6	11.6	1.8	2.1	10.3	1.6	2.3	2.1	4	4.5	3.8	2.1	1.8	1.2	6.7	6.5	9.5	15.9	7.9	11.2	11	9.6	20.7	20.4	23	27.7	11.3	15.2	13.2	13.1	27.3	20.2
chrIII	6532506	6533766	C09E7.1	0	0	0	0.2	0	0.1	0	0	0.1	0	0	0	0	0.1	0	0	0	0.1	0	0	0	0	0	0.1	0.1	0.1	0	0.1	0	0.1	0	0	0	0	0.3	0	0	0	0	0.2	0.1	0	0	0.1	0.2
chrIII	6518660	6520003	C09E7.10	1.9	2	3.2	1	0.5	0.1	0.5	0.1	0.2	0.2	1.3	0.6	1.2	1.9	1	0	0	0.4	0.1	0.2	0.2	0.7	0.4	0.4	0	0	0	0.8	0.6	0.1	0.4	1.3	1.6	0.6	0.8	0.2	0	0.3	0.5	0.1	0.2	0.6	1.1	0.4	0.4
chrIII	6528148	6532035	C09E7.2	2	0.3	0.9	1.9	0	0.1	0	0.1	0	0.3	0.8	1	0.1	0.4	0	2.7	2.6	1.5	0	0	0	0	0	0	2.8	2.5	0	0.1	1.1	1.4	1.3	1	0.5	0.8	0.4	3.9	3.4	4.4	4.1	1.7	1.9	1.6	0.8	2.3	3
chrIII	6524048	6525607	C09E7.3	1	4.1	1.7	5.5	2.3	1.2	1.4	0.5	0.6	1.2	2	4.5	4.7	6.4	4.9	0	0	2.8	1.3	1.8	0.6	1.8	2.5	2.2	0	0	0.9	3.7	4.3	0.8	6.5	5.9	3.2	7.9	9.6	2.8	8.5	4.6	3.9	1.1	1.6	2.9	5.9	6.1	3.1
chrIII	6534413	6536942	C09E7.4	7.9	4.1	7.1	5.7	4.9	4.5	4.5	5.3	4.9	5.9	4.6	5.3	4.6	6.9	4.9	19.7	22.2	3.3	4	3.4	3.9	1.4	2.9	1.2	20.5	20.5	3.3	3	7.5	29.9	23.4	9.6	5.4	3.8	4	23.7	32.2	37.7	26.6	44.8	21.2	4.5	3.5	16.8	20.8
chrIII	6538047	6541259	C09E7.5	0	0	0.3	0.1	0	0	0.1	0.3	0.2	0.2	0	0.2	0.1	0.1	0.1	0	0	0	0.1	0.2	0.1	0.1	0	0.1	0	0	0.1	0.2	0.7	0	0	0.2	0	0.1	0.2	0	0	0	0.1	0.1	0.1	0	0.1	0.1	0
chrIII	6545286	6546351	C09E7.6	0.7	2.4	1.6	0.7	2.1	2.1	1.4	3.3	3	2.8	1.7	3.3	0.7	2.8	1.1	0.6	1.5	0.8	1.6	1.3	1.4	2.2	0.7	0.4	0.9	0.7	2.2	1.1	1	1.7	1.9	1.7	0.9	1.4	2.1	0.8	2.6	2.1	2.5	1.4	3.1	1.4	2	3.1	1.3
chrIII	6546670	6551225	C09E7.7	9.2	6.1	12.6	6.6	15.2	13.1	13.8	15.7	14.7	16.3	9.2	8.8	6.6	6.6	6.5	7.9	8.3	3.5	11.5	10.7	11.4	11.5	13.1	12.4	7.3	6.7	11.4	17.1	7.5	12.4	17.3	6.7	7.3	6.5	6.2	8.8	7.8	10.7	9	11.8	13.7	6.5	6.9	13.6	12.7
chrIII	6553506	6558522	C09E7.8	3.6	2.7	3.5	2.3	10.5	9.7	9.5	9.2	9.7	10.8	3.7	3.6	2.7	2.9	2.4	4.9	5.5	1.1	6.6	6.5	6.9	8.6	7.7	7.8	4	3.9	5.9	12.6	3.1	4.8	7.4	2.2	3	2.8	2.9	3.5	3	4	5	4.1	4.5	1.4	2	4.4	4
chrIII	6541554	6545120	C09E7.9	2.1	1.4	4.1	2.4	4.5	4.5	4.3	4.6	3.8	4.7	3.9	2.6	2.5	2.4	2.4	2	1.8	1.4	3	2.9	3.4	3	3.3	2.7	1.7	2	3.2	4.3	2.8	4.1	3.3	3.2	2	2	2.1	2.5	1.5	4	3.9	4.5	4.3	3.1	3.1	3.7	3.6
chrII	556483	564123	C09E8.1	21.3	25.7	21.2	21.4	14.5	11.9	12.2	12.7	12.1	12.6	26.2	28.3	27.6	22.3	22.8	8.5	10.3	15.8	10.6	15.1	11.6	20.8	17.1	16.8	9.5	9.9	10.4	25.8	22.7	16.9	19.3	20.4	23.4	25.6	26	19.2	22.1	23.3	25.2	20.3	22.2	24.6	24.4	26.8	22.5
chrII	553093	554785	C09E8.2	38.5	17.3	17.8	28	1.6	0.2	2.4	2.3	0.4	1.9	18.6	23.8	4.4	7.5	1.5	0	0	19.4	0.3	2.8	0.3	0	0.2	0	0.1	0.1	0.6	0	16.6	3.9	10.9	15.2	15.2	14.2	5.9	14.6	19.6	17.3	21.4	4.2	7.5	57.9	11.1	17.8	11.3
chrII	546703	552025	C09E8.3	427.4	59.8	157.9	444.7	13.1	3.5	9.7	14.2	4.9	10.5	248.1	250.6	28.4	118.8	60.7	21.3	24	334	6.6	33.6	3.2	4.2	2	1.5	19.1	22.8	2.9	2.9	248	57	62.2	279.7	236.5	177.4	101.4	198.8	193.2	256	299.4	91.1	90.8	312.4	87.8	90.6	90.8
chrIV	1275864	1277091	C09E9.1	21.8	41.8	29.6	21.5	33.4	37	38.2	39	29.9	36	18.4	20.2	21.6	24.7	16.3	66.1	74.2	16	26.5	25.5	38	27	26.8	24.9	69.4	65.1	28.7	20.7	29.1	41.8	58.4	28.5	30.7	28.4	31.2	56.4	78.4	47.5	49.2	41.4	36.9	19.9	16.9	49.8	53.3
chrX	11047348	11049166	C09F12.1	79.7	43.8	55.7	24.2	32.5	25.7	28.6	43.1	27.7	30.1	23.9	18.2	24.8	19.2	20.1	0.5	0	15.1	20.3	30.6	15.7	28.3	48.1	59	0	0	14.7	49.5	64.5	4.1	15.1	38.1	48.7	36.9	56	3	14.3	11.7	17.1	1.2	5.7	63.1	32.4	18.9	8.2
chrX	11053877	11056904	C09F12.2	1.6	1.9	3.9	2.6	0.8	0.6	1	0.4	0.4	0.5	4.4	4.7	7.5	5.9	7.2	0	0.1	2.3	0.4	1.1	0.3	1.3	0.7	0.5	0	0.1	0.3	1.9	10.8	0.2	0.3	6.6	6.6	6.6	8.1	0.1	0.1	0.4	0.4	0.3	0.4	5.3	3.9	0.3	0.3
chrX	11040965	11042791	C09F12.3	0.7	0.5	0.8	1	0	0.2	0.2	0.1	0.1	0.4	2.2	1.4	1.1	1.7	1	0	0	1	0.1	0.1	0	0.5	1	0.3	0	0	0.1	0.9	2	0.2	0.6	3.3	1	1.5	1.2	0.3	0.5	0.9	0.9	0.1	0.3	2.9	1.5	0.9	0.7
chrIII	658705	662731	C09F5.1	28.1	43.6	39.3	33.4	4.7	3.2	4.5	4.7	3.5	4.4	22.6	22.4	17.9	39	33.9	4.7	4	20	3.3	3.4	4.1	5.1	3.9	2.9	3.7	3.6	4.1	4.4	32.6	41.4	82.3	31.7	27.3	24.2	30.7	95.2	84.6	113.9	89	66.3	67.8	48.2	26.9	100.8	75
chrIII	647122	654460	C09F5.2	9.4	11.2	11.7	16.5	16.3	19.7	19.9	19.4	19.4	20.6	12.7	11.4	10	12.5	10.7	22.9	22.6	11.6	16.3	15.9	18.7	32.1	20.4	25.3	24.1	24	17.9	21.9	11.9	23.2	23.9	12.8	12.6	16.2	15.5	19.4	16.3	20.1	19.1	14.1	20.8	14.1	13	20.2	20.2
chrIII	662843	666261	C09F5.3	0.3	0.7	0.7	0.7	0.1	0.2	0.3	0.2	0.1	0.1	0.2	0.2	0.5	1.1	0.6	0.2	0	0.6	0.1	0.3	0.1	0	0.1	0.1	0.2	0.2	0	0.3	0.4	0.8	1.8	2.7	0.3	0.4	0.3	1.2	3.3	2.4	4.2	1.8	2	1.9	0.8	2.2	2.3
chrII	14698639	14699256	C09F9.1	0	0	0	0	6	2.6	7.3	4.7	3.8	4.9	0	0.3	0	0	0.2	2.3	1.9	0.2	5.5	9	5.9	49.4	58.9	69.6	2.1	2.6	3.1	52.4	0	2.2	1.5	0	0	0	0	2.6	1.1	1.8	0.9	4.9	1.3	0	0.2	2.8	3.2
chrII	14705440	14712525	C09F9.2	15.8	24.4	37.3	66.9	2	1.2	2.5	3	1	3.9	74.2	77.1	113.7	66.3	96.1	13.3	15.5	42.4	0.8	3.5	0.9	2.2	1.6	2.7	14.1	14.2	0.5	2.4	74.8	140.3	101.5	65.4	71.2	68.8	70.7	135.4	129.8	132	127.2	159.7	149.2	65.3	59.4	168.3	160.4
chrII	14720476	14733383	C09F9.3	10.2	19.7	16.6	5.4	7.3	5.9	9.3	8.8	6.7	9	8.5	9.2	11.5	6.3	4.6	0.5	0.4	4.5	7	9.9	8.2	38.8	23.6	26.8	0.4	0.2	8.7	33.6	7.5	0.7	4.1	8.2	4.4	5.3	3.5	1.5	2.4	1.8	2.7	1.4	1	6.6	7.1	5.3	3.4
chrX	15966040	15972229	C09G1.1	0	0	0	0.2	0.8	0.9	1.2	1.1	1.1	0.6	0.2	0	0	0.2	0.1	0	0	0.1	0.9	1	0.9	0.9	0.8	0.5	0	0	0.7	1.1	0.1	0.1	0.3	0	0.1	0	0.1	0	0	0	0.1	0.2	0.1	0	0	0.2	0.6
chrX	15977690	15982529	C09G1.2	0.4	0.1	0.3	0.3	0	0	0	0.1	0	0.1	0.2	0.2	0.2	0.4	0.2	0.1	0.1	0.2	0	0	0.1	0.2	0.2	0.2	0.1	0.2	0	0.1	0.2	0.3	0.3	0.1	0.2	0.1	0.3	0	0	0.1	0	0.1	0.2	0	0.1	0.1	0.1
chrX	15986091	15987523	C09G1.3	0	0	0	0	0	0	0	0.2	0	0.1	0	0.2	0	0.1	0.1	0	0	0	0	0	0	0	0	0	0.1	0	0	0	0	0.1	0	0.8	0	0.2	0	0	0	0	0	0.1	0.2	0	0	0	0
chrX	15987900	15996865	C09G1.4	6	6.5	6	10.4	2.9	2.3	3.3	2.7	2.5	2.5	8.3	6.6	7.6	9	8.7	6.8	6.3	8.1	2	3.9	2.3	2.2	2.6	1.7	6.7	6.5	2.9	3.5	10.6	6.1	5.9	11.5	12.2	8.6	9.6	9.6	10.6	11.5	13.1	6.1	9.7	10.7	18.3	7.8	7.1
chrX	15959028	15962250	C09G1.5	8.1	16.5	10.7	21.9	5.5	4.2	10.8	4.7	4.3	6.2	11.7	8.8	13.9	38.5	17.3	19.2	19.6	20.2	4.4	13.2	2.9	29.3	15.9	19.8	21.1	29.6	3.3	20.4	31.4	29.9	13.3	18.9	20.3	17	26.2	25.2	25.5	19.1	22.7	51.9	22.1	20.1	27.2	9.8	13
chrIV	3502135	3503909	C09G12.1	1.3	0.3	1.3	0.8	0	0.1	0.6	0	0.1	0.2	1.7	1.3	1	1.2	1.3	0.4	0	0.7	0.1	0.1	0.1	0.5	1	0.4	0.6	0.4	0.2	0.4	1.6	8.5	8.1	1.3	1.5	0.8	1.3	10.6	11.1	14.2	16.3	12.6	13.7	0.3	2.3	14.4	13.1
chrIV	3504440	3506112	C09G12.10	0.2	0	0	0	0	0	0	0	0	0	0	0	0	0	0	0	0	0	0	0	0	0	0	0	0	0	0	0	0	0	0	0	0	0	0	0.1	0	0.1	0	0.1	0	0	0	0	0.1
chrIV	3482891	3484703	C09G12.11	0	0	0.1	0.1	0.1	0	0	0.1	0	0	0.1	0	0	0.1	0	0	0	0	0	0	0	0	0	0	0.1	0	0	0	0	0	0	0.8	0	0	0.1	0	0	0	0.2	0.1	0	0.3	0.2	0	0.1
chrIV	3480007	3481857	C09G12.16	0	0	0	0	0	0	0	0	0	0	0	0	0	0	0	0	0	0	0	0	0	0	0	0	0	0	0	0	0	0	0	0	0	0	0	0.1	0.1	0.1	0	0	0.1	0	0	0.1	0.1
chrIV	3495292	3496437	C09G12.17	0	0	0	0	0	0	0	0	0	0	0	0	0	0	0	1	4	0	0.2	0	0.2	0	0.3	0	2.3	2.3	0.4	0	0.6	2.5	1.8	0	0	0.4	0	1.3	0	1.2	0.6	0.8	2.1	0	0	2.3	0.7
chrIV	3493606	3495176	C09G12.2	0	0	0	0	0	0	0	0	0	0	0.2	0	0	0	0	0	0	0	0	0	0	0	0	0	0.1	0.1	0	0	0	0.4	0.1	0	0.1	0	0	0.1	0	0	0	0.1	0	0	0	0	0.3
chrIV	3491773	3493213	C09G12.3	0.3	0	0	0.1	0.1	0	0	0	0	0	0.1	0	0.1	0	0.1	0	0	0	0	0	0	0	0	0	0	0	0	0	0	0	0	0	0.1	0	0	0.1	0	0	0	0.1	0	0.2	0.3	0	0.1
chrIV	3479331	3479727	C09G12.5	0	0	0	0	0	0	1.2	1.9	0	0	0	0	0	0	0	0	0	0.3	1	1.6	6	1512.4	1276.9	1625.7	0	0	2.6	1988.5	0	0	0	0	0	0	0	0	0	0	0	0	0	0.8	0	0	0.5
chrIV	3477388	3479008	C09G12.6	0	0	0	0	0	0	0	0	0	0	0.1	0	0	0	0	0	0	0	0	0	0	0	0	0	0	0	0	0	0	0	0	0	0	0	0	0	0	0	0	0	0	0	0	0	0
chrIV	3506285	3509526	C09G12.8	32.3	37.5	36	43.1	39.3	47.4	40.4	44.1	42.2	53.6	49.2	51.6	39.3	33.3	37	125.6	108.4	33.7	44.7	40.5	43.9	37.1	35.9	30.8	125.7	114.3	38.1	40.3	38.9	96.9	91.2	35	51	53.6	43.6	106.7	89.2	59.4	81.1	86.8	87.3	40.5	37.7	112.8	103.9
chrIV	3510470	3514559	C09G12.9	35.5	38.8	39.1	53.4	70	74.5	70.1	79.4	70.6	72.6	54.6	53.4	57.1	47.2	51.5	80.4	74.8	42.7	54.9	58.3	53.9	46.4	47	46.5	74.7	74	54.2	63.3	51.5	110.9	116.6	46.1	43.6	45.5	46.7	99.6	112	110.3	113.7	135.9	115.2	54.8	51.8	121	111.8
chrIV	8540540	8544366	C09G4.1	44.7	11.4	34.1	16.2	39.2	38	30.2	38.3	32.6	37.8	28.3	28.5	22.4	14.5	14.3	40.4	33.1	18.9	23.8	23.9	24.6	21.7	26.7	33.2	40.3	36.7	23.5	38.9	26.4	44.4	43	21.8	27	29.1	23.4	48.1	44.8	67.1	60.6	33.4	53.5	35.9	35.5	50.4	47.1
chrIV	8520880	8538173	C09G4.2	58.9	41.9	48.2	46.4	45.9	26.9	36.7	31.5	21.6	37.5	41.6	42.6	33.6	45.6	37.6	1.9	3	48.4	30.6	35	30	33.7	57.5	40.2	0.9	0.8	32.9	49.6	26.3	11.2	103.4	27	47.4	47.3	40.5	48.3	65.6	68.6	61.6	66.6	22.1	38.1	29.6	84.3	45.6
chrIV	8513914	8514711	C09G4.3	79.3	20.1	103.2	42.9	208.3	207	203	211.4	216.5	195.7	58.6	51.3	47.8	51.2	40.1	694.1	741.7	29.7	161.3	158.8	148.5	58.5	57	56.6	689.3	715.2	131.3	80.2	46.8	650.8	358.7	34.5	52.5	47	47.6	335.3	327.9	402.2	290.2	674.7	508	70	65.9	258.5	447.9
chrIV	8513409	8513753	C09G4.4	59.6	20.4	11.1	61.7	110.8	100.3	85.9	72.1	110.9	81.8	37.2	71.5	38.8	24.7	56.7	104.1	141.9	39	68.5	93.7	53.8	18.5	10.6	14.8	111.3	127.8	48.6	30.5	41.8	141.2	175.9	15.1	58.5	23.2	35.5	44.1	89.2	49	82.2	143.1	66.3	28.1	18.8	60.1	59.4
chrIV	8511270	8514709	C09G4.5	10.5	7.6	12.4	9	28.3	28.8	26	31.4	29.5	31.7	17.1	13.5	13	10	7.5	48.8	47.1	5.8	22.9	18.8	20.1	11.4	7.9	7.2	46	44.8	18.5	12	10.5	42.3	34.3	10.3	10.2	11.7	10.2	25.9	19.1	20.9	25.1	35.7	31.8	13.5	10.8	20.6	25.2
chrII	10694994	10702465	C09G5.1	2.5	3.1	3.6	2	0.2	0.2	0.4	0.2	0.2	0.3	1.5	1.8	1	3.4	2.2	0	0	1.5	0.2	0.2	0.2	1.2	1	0.7	0	0.1	0.2	1.2	2.1	0.3	0.9	1.2	1.4	1.7	2.2	1.1	0.9	1.5	2.2	0.3	0.4	1.6	2.4	0.9	0.7
chrII	10702173	10714240	C09G5.2	8.1	6.2	7.5	5.3	15.6	18	16.2	18.9	17.7	19.8	10.7	10.3	8.3	6.9	6.3	11.2	10	6.5	13.2	13	12.7	6	5.6	5.1	9.9	10.6	12.3	8.5	5.3	8.4	8.6	5.8	7.2	7.9	6.3	7.5	6.9	8.6	9.9	8.9	8.4	4.7	8.2	8.2	5.9
chrII	10703558	10704515	C09G5.3	11.2	10.9	6.3	7.8	6	1	7.2	10.5	2.3	5.7	14.2	16.7	3.7	3.6	1.8	0	0	4.3	2	13.6	2.4	0.1	0.6	1.3	0	0	1	0.1	2.4	0	0	2.1	2.1	3.5	0.9	0	0	0	0	0.1	0.2	9.5	2.3	0	0.1
chrII	10704843	10705961	C09G5.4	826.5	2271.2	846.4	232.5	296.9	116.4	354.9	253.2	265.7	237.9	366.8	325.8	1109.4	970.9	522.4	3.6	2.3	482	179.6	789.2	162.5	16.1	56.7	21.9	2	2.6	158.2	3.9	261.7	5.8	23	1035.6	641.7	569.1	701.4	3.8	20.8	10.9	46.6	0.9	14.1	966	1613.7	26.8	20.7
chrII	10707143	10708227	C09G5.5	16.1	230.7	41.7	34.9	3275.6	3075.7	3777.8	2658.6	3257.7	2485.7	72.1	68	240.8	154	177	1.7	2	82.6	3411.7	3835.5	3500.5	1228.2	2493.1	2170.1	0.7	0.7	3994.3	507.8	138.4	1.8	3.8	135.5	157.7	117.5	233.3	0	1.6	2.3	1.1	0.2	0.7	46.5	139.8	0.8	5.8
chrII	10708900	10712066	C09G5.6	0	0	0.1	0.1	10	2	15.3	15.1	4.4	10.2	0.4	0.4	0.2	0	0.7	0.1	0.1	0.1	6.9	52	4.1	0.4	0.5	3	0	0	2.3	0.6	0	0	0	0.2	0.2	0.5	0	0.1	0	0.2	0	0	0	0.3	0.1	0	0.1
chrII	10714853	10716395	C09G5.7	0.2	0.2	0	0.1	2.2	1.1	3	2	1.6	1.4	0.6	0.3	0.1	0.1	0.1	2.8	2.1	0.2	4.9	7	5.7	32	30.8	34.2	2.6	3.3	5	27.5	0.1	0.8	3.1	0.3	0.2	0.3	0.1	1.1	0.3	0.4	0.7	0.7	0.7	0	0.2	1.1	0.5
chrII	10717276	10729193	C09G5.8	0.5	1.1	1.3	0.8	0.2	0.1	0.1	0.1	0.1	0.1	0.4	0.3	0.4	1.1	0.8	0.6	0.3	0.5	0.1	0	0.1	0.4	0.3	0.3	0.5	0.4	0.1	0.7	1	3.3	5.1	1.1	0.6	0.5	0.8	7.3	7.1	9.1	7.5	5.3	7.1	1.4	1	8.6	6
chrIV	8862474	8865477	C09G9.1	24.6	42.8	38.1	37.2	78.5	74.5	81.5	65.4	76.8	72.6	42.1	39.2	48.6	51.7	44.4	53.2	57	28.8	72.9	91.7	69	67.6	51.1	46.9	55	56.4	68.5	75.9	62	48.3	44.7	43.6	41.1	46	51.3	31	34.5	33.3	40	64.8	41.4	64.7	68.3	33.6	39.9
chrIV	8868023	8869668	C09G9.2	15.3	10.3	20.7	13.5	55.5	54	45.6	56.1	53.1	55.9	26	19	17.4	16	14.3	105.6	113.2	11.9	35.7	26.8	29.1	15	15	13.6	109.9	104.1	27.2	21.8	13.5	73.2	48.9	13.9	19	18.7	20.3	53.7	32	36.4	39.7	56.8	46.1	17.7	17.8	31.1	32.7
chrIV	8869948	8873044	C09G9.3	0.5	0.9	0.8	1.9	0	0	0	0	0.1	0	1	1.3	0.8	0.7	0.7	0	1.3	0.6	0	0	0.1	0.3	0.3	0.3	0.1	0.1	0	0.3	0.6	0.6	1	0.8	1.6	2.3	1.1	2.7	2.2	0.8	0.8	0.9	1	4.9	0.5	1.1	0.8
chrIV	8874133	8876963	C09G9.4	0.1	0.1	0.2	0.4	1.4	0.7	2.6	0.9	1	1.2	0	0.1	0.1	0.1	0	0.1	0.3	0	0.6	2	1.2	28.6	24	25.4	0.1	0.1	1.4	29.5	0	0	0.1	0	0	0.1	0.1	0.1	0.1	0.1	0	0.1	0.1	0.1	0.2	0	0
chrIV	8886512	8888589	C09G9.5	5.5	4.2	7.4	2.7	0.6	0.2	1.1	0.3	1.1	0.9	3.4	1.6	1.2	1.6	1.8	0	0.4	0.4	0.2	0.3	0.2	1	1.5	0.7	0	0	0.5	0.8	7	0.3	1.2	4.5	2.9	3.2	4.3	0.6	2.5	0.9	2.1	0.7	0.5	2.7	3.5	2.1	1.3
chrIV	8888959	8890987	C09G9.6	4.2	0.9	2.3	2.6	185.4	204.5	178.4	195.7	193.1	199.1	6.4	6.8	5.2	1.8	1.2	382.6	345.2	1.1	150.2	130.8	145	41.8	41.3	39.3	386.3	350.7	134.4	48.2	2.9	216.2	112.6	1.8	3.1	3.1	2.6	118	61.4	69.8	67	151.2	144.6	0.5	2.5	50.3	93.6
chrIV	8877515	8879880	C09G9.7	0	0.1	0	0.2	3.4	2.8	2.7	1.4	1.3	1.2	0	0	0	0	0	0	0	0	1.5	1.6	0.8	0.7	0.9	0.8	0.2	0	0.8	1.1	0.2	0.1	0.1	0	0	0	0	0.2	0.2	0.1	0.2	0.1	0.1	0	0	0.2	0.2
chrIV	8881470	8882402	C09G9.8	0	0	0	0	5.9	1.5	1.7	2	1.5	2.6	0	0	0	0	0	0	0	0	2.6	0	1.4	0	1	0	0	0	0	2	0	0	3.8	0	0	0	0	0	0	0	0	0	0.6	0	0	2.1	2.4
chrII	11092690	11093796	C09H10.1	0.4	0	0.2	0.3	3.8	1	5.3	2.1	1.6	2.5	0	0	0	0	0.2	0	0	0.3	2.9	5.3	3.3	46.9	51.6	51.3	0	0	2.6	44.4	0	0.2	0.2	0.9	0	0.2	0	0	0	0	0	0	0.1	0.4	0.2	0.3	0
chrII	11094986	11096417	C09H10.10	10.5	4.8	7.8	6.4	22.1	20.8	18.9	21.3	24.1	24.6	9.8	10.3	8.5	8.1	8.2	14.1	11.2	7.1	16.8	14.7	15.3	12	9.3	10	12.9	10	15.4	13.4	7.6	10.6	9.4	7.9	8.9	8.9	9	10.5	7.2	8.6	9	8.7	8.6	7.4	10.5	5.6	7.5
chrII	11096508	11097148	C09H10.2	1876.6	4448.1	1967.4	6625.3	4403.4	4713.7	4878.7	5524.9	4362.5	6711	6129.2	5949.3	5418.3	4897.2	6245.5	592.2	775.6	6241.7	4987.7	5158.7	5263	3462	3633.1	3870.6	598	734.9	4305.9	2693.3	6276.4	1278.5	1716	5455.5	7971.5	10348.8	9231.1	2982.5	4404.6	2265.2	2216	1633.7	1682	3700.4	5208.6	1906.7	1817.8
chrII	11097782	11100260	C09H10.3	172.6	146.4	201.5	197.8	145.7	138.3	151.3	132.8	122	139.8	191.7	195.5	207.2	183.9	192.7	218.8	197	196.8	128	135.8	133.5	177.9	179.5	164.4	223.6	202.8	121.4	170.5	202	159.8	148.4	182.3	218.9	218.7	200.3	141.7	121.2	132.5	129.7	130.3	132.6	122	160	135.8	124.4
chrII	11100913	11102890	C09H10.5	19.8	23.3	15.1	27.4	99.2	104.9	90.4	101.9	81.1	109.5	42.2	35.4	38.8	23.9	20.6	224.6	205.2	19.7	73.8	54.8	85.4	56.4	54.3	50.7	226	214.9	62.8	58	22.3	136.9	114.7	40.2	39.4	39.6	35.9	108.2	92.6	68.9	99.2	85.5	120.6	15.6	22.9	94.9	107.5
chrII	11106557	11108365	C09H10.6	25	14.5	27.9	19.4	95.5	95.2	89.3	101.4	89.6	95.7	21	23.7	21.9	15.1	14.9	185.1	178.3	14.6	83.2	66	88.2	46.5	50.1	43.2	188.3	177.1	89.1	41.1	16.2	153	121	17.1	20.1	21.7	20.2	112.8	65.9	66.1	67.9	118.1	107.7	21.8	19.7	72.3	80.8
chrII	11108126	11109525	C09H10.7	12.1	6.9	15	10.5	37.3	45.5	36.5	42.2	40.8	41.9	16.3	17	18.6	11	11	94.6	89.2	9.6	37.3	36.1	33.2	16	17.3	17.3	92.9	86	35.8	21.3	8.6	74.3	33.3	9.4	11.3	14.2	12.6	50.2	29.5	33.6	34.5	68.8	56.9	14.3	12	34.3	55.1
chrII	11109525	11111111	C09H10.8	1.4	1.4	3.9	3.5	1	0.5	0.5	0.4	0.3	0.4	3.6	1.4	2.5	5.1	3.8	0	0.3	1.9	0.3	1	0.5	2.6	1.9	2.4	0	0	0.1	2.1	3	0.7	1.8	4.1	3.5	3.4	4.3	1.7	3	2.4	3.7	0.5	0.8	4.9	3.1	2.2	1.8
chrII	11104403	11105988	C09H10.9	0	0	0	0	2.3	0.7	2.6	1.3	1.2	1.5	0.2	0.2	0.1	0.1	0	0.2	0.2	0	1.6	2.6	1.1	32.4	32.1	32.1	0.5	0.4	0.9	43.2	0	0.2	0.1	0	0.2	0	0	0.2	0	0.1	0	0.2	0.1	0.1	0	0.1	0.4
chrV	8082346	8082747	C09H5.1	0	0	0	0	0	0	0	0	0	0	0	0	0	0	0	0	0	0	0	0	0	0	0	0	0	0	0	0	0	0	0	0	0	0	0	0	0	0	0	0	0	0	0	0	0
chrV	8076064	8079894	C09H5.2	39.5	21.4	50.9	23.2	35.5	9.7	42.1	10.2	5.3	10.7	21.7	18.4	32.9	24.4	11.7	0	0	8.2	6.4	10.4	22.9	41.9	20.2	20.4	0	0	26.1	22.2	14.1	0.4	9.3	14.1	10	39.9	29.3	0.8	4.1	2.5	15.8	0.9	0.4	31.9	15.2	9.4	4.4
chrV	8065759	8067880	C09H5.3	0	0	0	0	0	0	0	0	0.1	0	0.1	0	0	0	0	0	0	0	0	0	0	0.1	0	0	0	0	0	0	0.1	0	0	0	0	0	0	0	0.1	0	0	0	0	0	0	0	0
chrV	8068131	8069709	C09H5.4	0	0	0	0	0.1	0	0	0	0	0	0	0	0	0	0	0	0	0	0	0	0	0	0	0	0	0	0	0	0	0.1	0.8	0	0	0.1	0	0.1	0.2	0.1	0.1	0.1	0.1	0	0	0.9	0.3
chrV	8070622	8072124	C09H5.5	0.4	0.3	0.5	1.2	0.2	0.3	0.8	0.2	0	0	0.6	0.5	0.3	1.1	0.3	0	0	0	0.1	0.1	0.1	0.2	0.1	0.3	0	0	0.2	0.3	0.5	0.2	1.7	0.3	0.4	0.8	0.5	0.3	0.3	0.4	0.6	0.2	0.1	0.1	0.2	2.5	1.4
chrV	8080346	8081658	C09H5.6	1.2	0.2	0.9	0.4	0.6	0.3	0.1	0.1	0.1	0.1	0.1	0.3	0.1	0.8	0.4	0	0	0.3	0.2	0.2	0.1	0.2	0.2	0.1	0	0	0	0.7	0.3	0.1	0.1	1.1	0	0.7	0.8	0.1	0.1	0	0	0	0	0.1	0.6	0	0
chrV	8084099	8085221	C09H5.7	0	0	0	0	1.9	1.1	2.8	0.9	0.6	1.1	0	0	0	0.1	0	0	0	0	0.7	1.4	0.8	21.2	18.6	22	0	0	0.4	23.3	0	0	0	0	0	0	0	0	0	0	0	0	0	0	0	0	0.1
chrV	8089298	8090675	C09H5.9	0.4	0	0.5	0.4	0.2	0.1	0.2	0	0	0.1	0.1	0.4	0.4	0	0	0	0	0	0.1	0.1	0	0.2	0	0.2	0	0	0	0.7	0.7	0	0.1	0.3	0.1	0.2	0.2	0	0	0	0.1	0	0	0	0	0.1	0
chrI	8103595	8109222	C09H6.1	15.8	10.9	22.2	13.4	15.9	16.3	13.7	17.6	15.7	17.5	14.2	14.4	13.4	11.5	11.4	83.1	78.7	8.5	14.4	12.3	15	13.5	13	12.1	78.3	77.8	14.5	16.4	15.8	63	51.1	17.4	11.5	12	11.7	41.8	35.5	50	40.6	54.5	54.3	15.4	13.3	40.2	49.5
chrI	8109737	8119309	C09H6.2	24.4	19.9	28	21.5	18.2	15.7	18.7	17.9	18.1	19.9	19.8	19.8	18.6	22.6	20.1	31	29.3	16.5	15.1	17.6	14.1	12.6	12.5	11.2	31.9	28.4	14.7	18	22.4	53.1	46.6	16.8	17	17.2	16.1	68.6	66.2	73.7	67.2	59.9	65.4	23.5	20.7	71.5	61.6
chrI	8125793	8130081	C09H6.3	8.3	5.3	10.2	6.5	25.3	24.8	22.4	26.3	24.3	28.4	10.3	8.7	7.9	6.8	5.2	58.8	53.5	3.2	17	13.4	17.5	8.7	8.4	7.5	58	53.5	15.6	14.3	6.6	36.2	26.9	10.3	7.5	7.1	6	24.2	16	21.7	23.6	35.6	31.2	6.6	7.9	20	25.8
chrX	7415793	7418582	C10A4.1	0	0	0.1	0.2	0.3	0.5	0.5	0.3	0.1	0.1	0.1	0.1	0	0	0	0.5	0.6	0.1	0.4	0.1	0.1	0.2	0	0.1	0.4	0.3	0.1	0.3	0.1	0.5	0.4	0	0.1	0.1	0	0.7	0.2	0.3	0.2	1.1	0.5	0	0.1	0.3	0.6
chrX	7398921	7400812	C10A4.10	5.1	6.8	5.7	2	6.9	4.9	8.9	6.5	6.2	6.6	3.3	1.9	3.6	2.9	2.4	0	0	0.8	3.6	7.3	3.8	8.4	6.2	5.5	0	0	4.9	9.4	4.4	0.5	1.4	5.1	2.5	1.3	2.3	1.1	0.6	1.3	2.4	0.6	1	1.3	2.4	1.3	1.1
chrX	7412449	7412704	C10A4.2	0	1.1	3	0	0	0	0.9	0	0	0	0	1.4	0	0	0	3.2	0	0	0	0.7	0	1.2	0	0.6	0	0	0	2.8	5.7	0	0	0	0	0	0	0	0	0	0	0	0	0	0.9	0	0
chrX	7407409	7408736	C10A4.3	1.3	1.3	1.3	1.3	0.6	0.4	0.9	0.8	0.4	0.9	2.7	2.8	2.3	1.8	1.9	1.1	1	0.7	0.5	1.1	0.4	3.3	3.6	3.2	0.5	1.7	0.4	6.3	1.6	20.7	22.2	5	1.5	2.2	1.8	19.5	27	35.1	27.7	30.7	26.3	3.4	3.7	26.9	25.2
chrX	7402084	7403567	C10A4.4	0	0.1	0	0.3	4.1	2.6	4.2	3.7	3.8	3.4	0	0.1	0.1	0.3	0.1	0	0	0	2.4	3.6	2	0.3	0.2	0.6	0	0	1.4	1.1	0.4	0	0	0	0	0	0.2	0	0	0	0.4	0	0.1	0	0.1	0.1	0.1
chrX	7393870	7396270	C10A4.5	0.4	0.2	0.4	0.4	0.3	0.2	0.2	0.5	0.2	0.3	0.5	0.4	0.7	0.7	0.6	4.5	3.8	0.3	0.1	0.2	0.2	6.9	4.1	5	4	3.3	0.3	8.5	0.8	1.1	1.5	0.9	0.6	0.5	0.8	1.1	0.5	1.2	2.3	1.1	1.6	0	0.6	1.8	1.9
chrX	7390527	7392230	C10A4.6	0	0	0	0	1	0.7	1.1	0.7	0.8	0.9	0.1	0	0	0	0	0	0	0	0.7	0.9	0.6	0.1	0.1	0	0.1	0.1	0.4	0.1	0	0	0.1	0	0	0	0	0	0.1	0	0	0.1	0	0	0	0.1	0
chrX	7413565	7415475	C10A4.7	1.2	0.1	0.2	0.2	0.1	0.3	0.6	0.1	0.4	0	0.5	0.2	0.3	0.2	0.5	2	0.5	0	0.2	0.5	0.3	0.6	0.3	0.8	1.6	0.8	0.4	1	0.7	0.3	1.2	0	0.2	0.1	0.3	0.8	0.8	0.4	0	2.3	0.5	0	0	1.7	0.8
chrX	7422627	7424836	C10A4.8	2.4	3.2	5.2	4.6	1.6	2.6	1.8	1.8	1.6	1.4	3	3.9	3.3	6.7	5.1	4.1	3.8	4.8	1.3	1.9	1.1	0.1	0.2	0.2	3	4.1	1.1	0.5	5.5	11.7	11.6	5.1	5.6	5.1	5.9	12.2	15.2	17.2	12.3	18.8	15.2	2.8	8.2	10.9	12.4
chrX	7420854	7421892	C10A4.9	0	0.2	0.4	0	2.8	1.2	2.7	2.4	1.4	2.4	1.2	1.3	0.9	0	0	0	0	0	0.8	6.1	0.7	0	0.2	0	0	0	1.6	0	0.4	0	0	0	0	0.2	0	0	0	0.2	0	0	0	0	0	0.3	0.6
chrV	8581238	8583555	C10B5.1	1.2	1.2	1.4	1.1	4.7	4.2	4.1	3.7	3.9	5.2	2.2	1.7	1.5	0.7	1	5.3	5.8	0.7	2.8	2.3	2.8	4.2	4.2	2.9	5	4.5	2.6	3.7	1	3.4	3.1	2.2	0.5	1.6	1.7	2.7	2.3	2.1	2.6	3.4	2.5	0.6	1.1	1.6	1.7
chrV	8583531	8584510	C10B5.3	28.1	25	29.5	19.1	37.5	24.2	43.8	36	35.7	32.4	15.7	15.1	21.9	33.3	31.2	0.4	0	16.4	24.8	51.5	32.6	24.2	28.9	28.9	0.5	0.7	33.2	53.7	19.3	14.8	23.1	13.4	23.4	24.7	32.8	21.1	25.3	31.3	25.4	17.2	26.2	34	31.9	30.7	29.9
chrIV	9359423	9366489	C10C5.1	14.7	14.7	17.4	12.1	15.7	14.9	16.5	16.7	14.9	16.8	16.4	19.2	16.8	15.5	17.1	20.2	16.9	10.7	11.3	10.2	11.2	12.7	14.3	10.4	20.2	18.5	10.4	22.3	14.2	31	24.8	13.9	16.6	17	18.7	28.1	24.8	32.1	35.3	39	27.4	14.4	13.2	28.3	31.4
chrIV	9371490	9373619	C10C5.2	3.4	1.3	11	1.2	0.8	0.3	1.2	0.3	0.4	0.3	0.6	1.5	2.1	0.4	0.5	0.3	0.4	0.1	0.5	0.5	0.6	3.9	1.9	2.8	0.4	0.3	0.3	1.4	1.5	0.1	3.9	1.1	1.1	1.2	1.6	0.2	0.3	0.1	0.3	0.2	0.8	1.7	2.7	3.7	1.5
chrIV	9374212	9376475	C10C5.3	3.7	3.1	9.4	1.5	13.9	4.5	17.6	16.9	5.2	23.5	2.2	2.3	5.7	3.2	1	8.9	11	0.4	9.7	9.4	11.2	28.6	21.6	17.5	7.8	8.9	13.7	35.5	4.7	9.2	6	6.4	1.6	0.9	3	2.5	2.4	2.3	2.6	7.2	4.8	0.1	1.1	3.2	4.5
chrIV	9378585	9380433	C10C5.4	2.4	3.7	4.7	1.3	26.5	10.7	29.3	25.8	8.8	29.1	1.5	1.4	3.1	2.3	0.6	9.9	11.3	0.8	12.3	16.4	10.5	61.1	35.8	45.6	10	10.7	13.8	88	3	8.5	8.1	3.5	1.1	0.7	2.1	3.5	2.3	4.2	3.6	5.6	5.5	0.2	0.9	3.3	5.3
chrIV	9381403	9383098	C10C5.5	2.7	3.5	8.4	1.1	7.4	2	9.3	8.5	1.8	10.9	1.2	0.9	2.7	2.2	0.3	10.2	11.1	0.3	3.8	3.5	4.5	45.3	31.3	31	8.8	9.1	5.6	86.6	4.3	11.6	7.7	8.7	1.3	0.7	2.5	3.2	3.3	4.9	4.4	4.6	6.3	0.1	0.6	4.7	5.9
chrIV	9386190	9394905	C10C5.6	25.6	19.6	31	21.1	30.4	31.3	28.8	33.9	32.6	35.2	20.4	20.9	18.7	22.2	20.5	57.3	48.1	14.1	28	23.3	28.8	16.1	15.4	13.2	53.2	50.4	25.3	18.4	20.8	55.6	44.2	22.5	18.4	17.8	17.6	43.6	34.4	46.1	42.6	53.5	53.1	24.2	23.5	44.1	43.8
chrIV	9385106	9385602	C10C5.7	17.6	22.1	6.4	81.2	18	12.6	17.1	13.8	8	12.3	43	39.1	42.8	76.4	53.3	0	0	34.7	6.5	11.7	10.5	41.2	41.7	47.8	1.7	0	7.3	60.3	108.5	2.5	11.9	105.7	61.5	59.6	78.7	0	5.3	4.7	4.1	2.1	3.5	65.3	62.8	16.7	10.6
chrIV	11425719	11447043	C10C6.1	17.1	16.4	19.4	16	50	49.9	47.8	48	49.2	50.2	17	15.3	13.9	18.3	14.5	95.1	90.8	11.5	43.5	39.7	43.6	25.1	24.9	23	94.7	90.3	43.9	32.8	17.8	55.7	39.9	13.4	12.8	13.1	11.8	55.2	37.9	44.7	46.5	63.9	48	19.5	18.4	35.3	40.7
chrIV	11459969	11463173	C10C6.2	1.8	2.3	1.7	3.2	0.5	0.4	0.3	0.6	0.2	0.3	2.1	2	1.5	4.8	2.9	0	0	2	0.6	0.4	0.3	0.7	1.5	0.9	0.1	0	0.2	2.1	2.2	0.5	1.5	3.2	3.4	2.4	4.4	0.8	2.1	2.1	3.4	0.4	0.9	2	4.2	1.9	0.6
chrIV	11463514	11465204	C10C6.3	0	0	0	0	1.3	0.5	2	0.8	0.5	0.9	0.1	0	0	0	0	0	0	0	0.7	1.5	0.7	19.4	24.8	24.2	0.1	0	0.5	22.2	0	0.1	0.1	0	0.1	0	0	0	0	0.1	0	0	0	0	0	0	0
chrIV	11470162	11473395	C10C6.5	18.3	8.4	15.2	13.2	32.5	31.1	31.8	35.3	34.7	38.3	15.9	19.7	11.3	6.7	6.9	59.9	66.3	8.2	23.4	24.8	25	13.6	12.4	11.4	62.6	62.7	24.5	20.5	12.3	54.2	33	14	11	10.5	8.5	27.2	14.2	22.6	22	40.6	38.5	12.1	8.7	20.2	29.7
chrIV	11473344	11479231	C10C6.6	41.1	16.9	42.7	27.8	32.6	30.5	27.1	33.9	29.3	36.1	36.5	34.7	24.6	32.9	27.4	75.1	63.4	17	21.5	18.1	22	28.1	26.2	23	70.7	65.9	19.4	43.1	34	72.9	77.3	39	32.8	33.5	34.5	49	42.6	65.2	61.1	73.4	66.4	31.4	24.8	43	51.5
chrIV	11465406	11467331	C10C6.7	0.8	0.1	0.5	1.4	2.7	4.5	3.2	5.1	4.4	5	1.9	1.1	2.3	1.2	1.1	2.1	7.6	0.4	2.3	2.2	3.2	10.7	8.9	8.8	6.6	4.5	3.1	11.9	0.5	3.5	3.2	0	1	1.9	2.4	2.3	2.7	2.8	3.1	1.9	2.1	1.8	2.4	4.7	2.6
chrX	16763635	16766583	C10E2.1	0	0	0	0	0.1	0.3	0.3	0.5	0.2	0.3	0	0	0	0.1	0	0.6	0.4	0.1	0.2	0.2	0.3	0	0	0	0.5	1.1	0.1	0.1	0	0.2	0.3	0.4	0.2	0	0.2	0	0.2	0.1	0	0.2	0.4	0	0.2	0.1	0.2
chrX	16745665	16748135	C10E2.2	1.4	0.8	1.9	1.3	0.7	0.4	0.6	0.9	0.7	0.6	1.2	1.3	1.1	1.8	1.6	0.6	0.2	1.2	0.5	0.8	0.5	0.9	0.6	1	0.7	0.5	0.8	1	1.7	1.2	1.4	1.6	1.9	1.3	2	1.7	1.4	1.9	2.1	1	1.9	1.6	2.9	1.2	0.9
chrX	16729485	16744625	C10E2.3	23.9	20.4	24.8	22	9.3	8.5	10.7	10.7	9.3	10.2	18.4	17.1	17.4	26.1	22.8	12.3	10.3	13.6	8.1	11	8.7	10.9	9.7	8.3	11.1	10.2	9.3	14.3	33	33.8	34.3	34.1	25.6	19.8	22.1	37.1	44.8	53.8	58.4	34.1	60.8	33.9	46.1	45.5	34.5
chrX	16749681	16751037	C10E2.4	0.9	1.7	1.6	2.2	0.6	1.2	0.9	1.7	0.8	1.5	1.9	1	1.4	1.6	1.2	5.3	3.9	1.1	0.3	0.5	0.7	1.1	1.3	0.7	7	4.5	0	0.1	0.4	0.7	2.8	4.4	0.7	0.5	1.9	1	3	1.4	3.7	0.3	0.6	2.3	4	2	1
chrX	16751790	16753600	C10E2.5	0.4	0.9	0.2	0	0.4	0.2	0.2	0.5	0.2	0.5	0.3	0	0.5	0.7	0.4	4.9	1.8	0.8	0.5	0.2	0.3	0.3	0.2	0.5	2.1	4.2	0	0.5	0.4	1.2	2	1	2.4	0.5	0.3	0.6	1	0.2	0.4	0.7	0.6	0.4	1.4	0.8	0.5
chrX	16767106	16770427	C10E2.6	62.2	55.3	90.8	47.6	60.7	63.9	57	57.5	79	60.3	73	73.6	90.7	82.2	95.2	117.7	104.4	62.3	53.8	72	59.4	14.8	22	18.7	108.3	111.8	58.1	16	69	182.6	89.4	85	106.6	74.4	89.6	112.7	108.3	106.1	106.7	141	203.3	61.9	224.3	110.7	121.8
chrV	5996339	5999329	C10F3.1	3.1	1.8	2.8	2	48.8	57.4	46.1	57.1	53.2	54.7	3.8	4.1	3.6	1.6	1.1	20.3	15.6	0.9	49.4	36.6	49	10.6	13.4	11.7	18.6	16.6	46.9	11.4	1.6	11.4	13	2.7	2	2.4	1.8	8.7	4.7	4.4	4.9	6	7.5	1	2.3	5.3	6.4
chrV	5983727	5985494	C10F3.2	3.3	2.8	3.2	7	0.3	0.2	0.4	0.2	0	0.2	5.2	4.5	6	5	7.7	0	0	4.4	0.2	0.3	0.1	0.1	0.1	0.1	0.1	0	0.2	0.3	5.8	4.8	9.2	6.9	6.8	6	5.8	10.8	11.7	11.6	9.9	14.3	7.4	6.6	3.9	10.7	8.6
chrV	5976011	5981496	C10F3.3	1.6	1	1.1	0.7	0.3	0.2	0.3	0.2	0.3	0.2	0.9	0.9	1.2	1.5	1.2	0.1	0.2	0.7	0.1	0.2	0.1	0.6	0.6	0.5	0.1	0	0.1	1.1	1.2	0.4	1.3	1.2	0.9	1.1	1.3	1.4	1.7	1.7	2.4	0.4	1	1.3	1.3	1.7	1.3
chrV	5961795	5969137	C10F3.4	6.9	9.5	8.4	9.2	3.4	1.9	3.1	3	2.1	2.5	7.3	7.9	8.8	11.5	8.2	14.3	13.5	6.7	2.3	2.8	2.7	6.4	6.2	6.2	14.9	15.2	2.7	9.7	9	21.2	23	6.1	11	8.2	8	18.3	18.9	24.8	22.1	18.3	19	7.6	9.3	20.5	14.7
chrV	5960566	5963820	C10F3.5	8.4	10.9	8	8.9	5.6	5.8	4.8	8.5	5.7	8.5	11.4	10.7	6.3	9.1	7	21.9	24.3	6	4.9	3.6	6.4	9.3	6.7	5.8	25.1	26.4	7.3	7.5	17.1	33	48.4	15.5	10.1	8.8	10.1	36.1	40.7	41	34	33.7	31.6	4.3	4.4	33.2	28.9
chrV	5986949	5990235	C10F3.6	11.1	6.4	12	7.3	4	4.6	2.6	2.7	4.5	3.1	12	9.6	7.5	9	9.9	0.2	0.1	9.7	3.7	6.7	3.8	7.7	8.3	7.3	0.3	0.2	2.8	12.2	6.9	5.6	9.1	5.5	10.5	10.3	8.6	12.1	12.9	20.7	18	8.3	12.1	8.6	8	13.9	11.7
chrV	5985422	5986837	C10F3.7	0	0	0	0.4	0.2	0.2	0.5	0	0.2	0.2	0.7	0.4	0	0.9	0	0	0	0.1	0	1	0.2	0	0	0	0	0	0.2	0	0	18.7	41.7	0.6	0.2	0.6	0.2	51.6	185.4	145.3	161.5	16.7	51.3	0	0.4	65.5	47.6
chrI	6307328	6308431	C10G11.1	0	0	0	0	0.7	0.5	1.5	0.5	0.3	0.3	0.1	0	0	0	0	2	1.8	0	0.3	2	0.6	13.6	10.2	12.9	1.6	1.3	0.9	11.7	0	0.3	0.2	0	0	0	0	0	0.1	0	0.2	0.1	0.5	0	0	0	0.3
chrI	6305027	6306382	C10G11.10	0	0	0	0	1.6	0.3	1.6	1	0.2	0.6	0.1	0	0.2	0	0	0.8	0	0	0.3	1.6	0.6	22.2	19.5	18.6	0.6	0.5	0.7	19.7	0	0	0	0	0	0	0	0.3	0.2	0	0.5	0.2	0.3	0	0	0.1	0.3
chrI	6302475	6304265	C10G11.2	0	0	0	0	0	0	0	0	0	0	0	0	0	0	0	0	0	0	0	0	0	0	0	0	0	0	0	0	0	0	0	0.4	0	0.1	0	0	0	0	0	0	0	0	0	0	0
chrI	6300494	6302300	C10G11.3	0	0	0	0	0	0	0	0	0	0	0	0	0	0	0	0	0	0	0	0	0	0	0	0	0	0	0	0	0	0	0	0	0	0	0.1	0	0	0	0	0	0	0	0	0	0
chrI	6297768	6299731	C10G11.4	0	0	0.1	0	0	0.1	0	0	0.1	0	0.1	0	0	0	0	0	0	0	0	0	0	0.1	0.1	0	0	0	0	0	0	0	0	0.3	0	0	0	0	0	0	0	0	0	0.3	0	0.1	0.2
chrI	6294897	6297638	C10G11.5	33.9	35.5	40	26.8	49.5	35.6	34	39.3	36.9	41.2	28.6	29.7	22.5	27	24.1	42.6	32.2	17.5	23.9	22.5	33	27.6	56.3	24.5	42.3	37	31.3	41.6	26.5	30.6	39.2	22.3	24.8	21.1	26.4	24.7	25.8	27.8	33.2	18.8	29.4	23.7	32.1	33.8	26.7
chrI	6289432	6293857	C10G11.6	8.1	5.3	12.3	5.6	21.3	21.3	20.7	23.2	22.4	20.6	8.2	7.2	6.1	8.4	5.8	18.7	14	2.8	16.6	13.7	14.6	8.7	6.1	6	18.6	17.4	14	11.7	4.5	14.5	11	5.7	5.7	4.7	5.1	11.5	10.5	12.1	11.9	15.3	13.3	6	9.1	10.1	11.2
chrI	6284972	6289342	C10G11.7	169	126.9	202.8	149	171.9	209.8	178.9	203.1	188.7	213.6	103.4	113.1	91.9	142.5	139.6	1448.9	1426	115	182.2	140.7	178.8	116.3	104.6	102.1	1436.8	1432.8	171.9	138.8	118	1425.6	1020.3	135.9	129.8	131.7	125.8	1238.6	973.4	879.6	906.4	1529	1205.1	193.5	145.7	1160.6	1144.7
chrI	6271982	6273770	C10G11.8	0	0	0	0.2	30.3	9.6	33.2	16.7	13.1	19.5	0	0.1	0	0	0	0.7	0	0	16.2	27.2	19.4	271.8	254.1	303.2	0.2	0.2	15.4	271.7	0	0	0	0.2	0	0.2	0	0	0	0	0.2	0	0	0	0	0	0.1
chrI	6274576	6275270	C10G11.9	0	0.2	0.1	0	123.9	41.6	160.1	82	63.5	71.9	0	0	0.3	0	0.2	4.9	1.8	0.4	78	186.7	103	2440.5	1838.9	2007.5	4.4	3.1	88.4	1597.3	0.3	0.1	0.8	0	0	0.4	0	0.3	0.1	0.1	0	0.2	0	0.7	0	0	0.9
chrIV	5820358	5830189	C10G6.1	35.1	25.9	41	38.2	9.3	5.9	8.8	8.1	7.5	9	35.8	35.4	28.8	35.6	34.8	8.4	5.6	20.8	6.2	10.4	6.3	14.4	12.3	12.3	8.2	7.1	6.3	19.4	42.9	31.7	46.5	32.6	30.9	33.8	37.8	49.2	54.1	69.6	69.9	36.4	47.1	35.7	28.5	58.4	43.3
chrV	5331250	5333039	C10G8.1	0	0	0	0	0	0	0	0	0.1	0.1	0	0	0	0	0	0	0	0	0	0.1	0	0	0	0	0	0	0	0	0	0.1	2.6	0	0	0.1	0	0.2	0	0.1	0	0	0	0	0.1	0.9	0.4
chrV	5314387	5315573	C10G8.2	0	0	0	0	0	0	0	0	0	0	0	0	0	0	0	0	0	0	0	0	0	0.9	1.5	1.6	0	0	0	3.3	0	0	0	0.7	0	0	0	0.2	0	0	0	0	0.1	0	0	0	0
chrV	5312873	5314273	C10G8.3	1.3	0	1	0.7	0.7	0.2	1.1	0.4	0.4	0.5	1.1	0.2	0.2	0.3	0.3	0	0	0.4	0.1	1.6	0.9	0.2	0.6	0.4	0	0	0.6	0.5	1	0.1	0.5	0	1.1	1.5	0.6	0.5	0	0.3	0	0.1	0.2	1.3	0.6	0.2	0
chrV	5311918	5312300	C10G8.4	0	0	0	0	213.2	222.9	152	192	169.1	288	0	0	0	0	0	0	0	0	131.5	61.6	186.1	0	4.3	4.3	0.4	0.4	139.6	6.2	0	0.4	0	0	0	0	0	0.7	0	0.5	0	0	0	0	0	0	1.5
chrV	5303670	5311230	C10G8.5	58.3	64.7	82.2	72.5	24.5	14.9	26.3	20.3	17.3	20.8	78.9	84.4	128.4	162.4	134.4	1	0.8	78.6	17.1	31.5	18.3	26.8	22.9	15.8	0.9	0.5	16.8	28.2	99.3	26.7	58.6	95.5	81.1	74.7	78.1	69	77.5	84.1	100.8	41.1	51.2	79.7	113.3	78.1	53.9
chrV	5315496	5319561	C10G8.6	6.5	2.5	8.8	12	3.5	1.6	2.7	1.8	1.4	3.1	12.4	13.8	11.2	16.3	11.2	2.3	3.2	8.9	2.4	3.3	1.9	2.8	3.3	2.3	3.4	2.9	1.8	4.8	12.4	48.1	52.4	13.1	9.5	8.4	9.7	63.6	79.7	98.5	87.6	79.5	63.4	7.3	13.6	91.1	74.6
chrV	5323187	5324600	C10G8.7	1.5	0.3	2.1	1.1	0.3	0.1	0.4	0.5	0.3	0.5	1.6	2.1	1.2	3.2	2	0	0	1.8	0.3	0.2	0.2	1.7	0.7	0.8	0	0	0.1	2.1	3.3	0.9	2.2	1.9	3.7	2.4	2.1	1.9	2.4	3.3	4.2	0.5	1.6	1.2	1.8	3	1.9
chrV	5324781	5328454	C10G8.8	160.1	52.1	183.9	71.2	75.2	55.9	66.8	67.3	71.8	56	67.3	58.9	61.8	77.1	96.2	3	1.6	88.4	78.7	90.6	81.9	69.8	80.4	78.9	2.9	1.4	80.2	79.2	69.8	26.6	72	55.4	59.9	59.7	65.7	70.5	76	99	76.4	43.9	58.5	73.7	77	96.8	71
chrI	4747627	4759602	C10H11.1	15.1	6.3	11.5	8.8	25.7	25.4	24.9	26.1	26.7	26.4	9.6	10.1	7.5	6.3	5.5	21.6	17.7	7.1	19.9	16.6	21.1	10.9	11.3	10.5	20.2	20.1	20	15	6.2	31.1	35.4	8	7.7	7.6	6.2	46.9	40.1	56.2	50.9	25.7	46.1	15.9	7.5	41.4	34.2
chrI	4759817	4761324	C10H11.10	2	1.3	2.2	1.7	94.9	113.4	93.1	99.6	104.4	106.1	5.8	4	4.8	1.1	1.4	12.1	6.9	1	111.2	98.6	108.5	6.8	14.4	8.8	11.8	10.4	105.7	7.8	1.5	7.9	8.2	1.5	2.2	2.8	1.6	6.3	4.2	4	3.3	4.9	6.7	1.7	1.2	6.9	7
chrI	4731604	4735280	C10H11.3	30.4	6.8	23.6	18.6	12.3	3.5	4	6.9	2	6.9	17.4	14.2	11	9.6	9.5	1.1	1.6	9.5	1.4	1.7	3.2	5.5	6.2	5.9	1.8	1.5	3.2	11.7	12.3	2.3	1.8	10	14.3	9.1	7.2	1.9	0.8	2.1	2.3	2	1.8	22.5	13.4	1.5	2
chrI	4727301	4730367	C10H11.4	8.5	2.7	13.1	6.3	4.9	2.9	4.3	5.4	3.2	5.7	12.5	11.3	10.5	3.9	3.5	4.3	4.6	2.4	2.2	1.8	4	8.2	7.4	4.7	4.7	4.5	3.6	6.8	5.4	2.4	2.7	4.3	3.6	4.4	4.2	2.6	1.4	1.7	1.1	2.3	2.2	3.7	5.4	2	3.9
chrI	4724065	4726780	C10H11.5	0.1	0.1	0.3	0.1	0.1	0	0	0	0.1	0	0.3	0.4	0.1	0.1	0.1	0	0	0.1	0.1	0.1	0.1	2.4	0.6	0.3	0	0	0.1	0.8	0.3	0	0.2	0.2	0	0.2	0.1	0.2	0	0	0	0	0.1	0.3	0.1	0.1	0
chrI	4721178	4723961	C10H11.6	17.4	6.7	53.3	11.6	5.1	4.9	7.7	5.4	5	6.2	24.5	24.7	47.9	10.3	18.8	0.6	1.1	7.7	4.6	4.9	9.8	27.6	7.1	5.2	0.4	0.6	9.5	7.1	15	2.2	2.6	16.3	12.7	11.3	16.9	1.9	2.6	3.6	2.7	1.3	2.6	10	18.1	2.5	3.2
chrI	4719789	4721099	C10H11.7	0	0	0	0	4.4	1.3	4.5	2.3	1.4	2.7	0	0	0	0.1	0	0	0	0.1	2.3	5.2	2.7	45.1	41.8	48	0.1	0.1	1.3	41.9	0	0	0.1	0	0	0.1	0	0	0	0	0	0	0	0	0	0	0.2
chrI	4735756	4737848	C10H11.8	5.9	5.5	6.7	4.7	13	13.6	10.6	14	11.5	15.8	5.6	6.2	4.7	4.4	3.8	15	18.7	3.6	9.3	7.5	10.1	4.3	4.8	3.7	15.5	13.3	10.7	4.8	3.9	12.2	12.8	5.5	5.3	5.7	5	14.4	10.2	12.7	10.9	10	12.5	4.9	4.9	10.3	9.7
chrI	4738170	4744322	C10H11.9	36.2	18.1	47.3	20.9	50.3	44.9	47.7	49.6	48.4	48.8	24.9	23.2	19.7	19.2	18.9	90.9	90.8	13.7	40.5	38.3	39.5	45.7	45.6	43.1	92.8	91	38.3	56.8	20.4	88.3	73.9	21.6	17.4	17.9	16.2	97.9	86.1	110.8	106.4	146.3	103.8	22.3	19.1	89	86.2
chrIV	6191274	6191538	C11D2.1	0	0	0	0	0	0	0	0	0	0	0	0	0	0	0	0	0	0	0	0	0	0	0	0	0	0	0	0	0	0	0	0	0	0	0	0	0	0	0	0	0	0	0	0	0
chrIV	6185876	6189194	C11D2.2	0.4	0.2	0.9	0.3	0.2	0	0.1	0.1	0.1	0.1	0.3	0.1	0.2	0.6	0.4	0.4	1.1	0.3	0.1	0.3	0	0.6	0.1	0.3	0.5	0.7	0	0.5	0	0.3	0.4	0.3	0	0.1	0.6	0.7	0.3	0.7	0.3	0.2	0.5	0.1	0.4	0.8	0.4
chrIV	6154094	6154612	C11D2.3	1.5	22.1	3.3	1	1	1.4	1.1	2.1	1.3	1.2	1.5	2.7	2.8	4.9	0.9	0	3.2	1.2	2.3	0.6	2.1	1.9	2.8	1.2	0.9	0.3	4.6	2.2	3.6	1.2	0.7	0	3.1	2.2	0.9	0.5	3.1	2.2	3.8	1.2	2.7	0.7	0.3	0.5	0
chrIV	6155481	6156895	C11D2.4	25.2	8.2	21.1	12.5	33.8	32.9	28.9	33.1	31.9	32.3	19.8	22.6	16.1	11	14	35.8	37.2	14.8	22	18.3	23.8	6.1	7.2	5.7	39.8	36.5	20.3	6.4	12.3	26.9	21.2	8.8	16.1	20.8	16.8	21.9	15.1	18.6	15.7	16.8	19.6	10.7	11.6	13.9	12.8
chrIV	6157298	6173029	C11D2.6	3.9	3.5	4.3	2	0.3	0.2	0.4	0.3	0.4	0.5	1.3	1.6	1.5	4.2	3	0.4	0.5	2	0.2	0.4	0.3	1.2	0.9	0.7	0.4	0.3	0.3	2	1.9	0.5	2.3	3	2.3	2.4	2.2	1.5	2	2.3	3.5	0.4	1.1	2.9	3.4	2.4	1.8
chrIV	6154545	6155390	C11D2.7	37.1	21.2	46.7	34	36.6	34.6	34.4	41.2	31.5	47.2	46.4	47.8	31.6	29.7	34.7	78.3	69.9	35.7	27.3	24.2	33	33.2	29.9	30.9	71.9	68.2	29.9	32.1	37.4	61.7	52	60.4	60.7	53.9	54	53.9	56.9	61.7	47.6	39.8	59.2	34.6	35.4	42.6	49.7
chrI	4422032	4426177	C11D9.1	5.6	7.3	7.9	4.3	1.4	0.9	1.2	1.5	1	1.6	4	3.7	2.9	6.3	3.8	1.1	1.4	3.8	0.8	1.2	0.9	1.6	1.2	1.2	1.4	1.1	0.6	2	4.1	3.3	8.4	3.1	3.9	3	3.4	7.7	11	14.8	17	2.8	7.3	6.6	5.3	10.7	7
chrX	9584614	9586433	C11E4.1	65.8	103	121.7	22.7	63.6	48.7	55.5	46.8	40.9	51.6	31.5	23.9	58.8	53.4	36.3	2.7	0.6	20.6	41.9	61.8	43.8	70.2	73.5	66.2	1	0.9	40.3	65.9	39.6	16.9	31.6	43.6	50.9	45.5	58.7	22.1	33.3	35.6	48.2	15.2	23.4	55.1	47.5	30.4	23.5
chrX	9587884	9588822	C11E4.2	9	14.9	16.8	5.1	8	7.2	9.7	10.5	8.5	11.2	8.7	8.9	22.1	21.2	21.5	0.2	0.2	7.7	9.8	18.2	10.5	8.3	12.8	14.6	0	0.3	8.5	15.7	11.8	3.2	8.8	17.2	11.9	15.4	23.2	4	7.8	6.7	10.6	2.7	5.1	5.9	25.3	10.5	6.9
chrX	9589365	9595433	C11E4.3	0.2	0.7	0.8	0.7	0.2	0.1	0.1	0	0.1	0.2	0.6	0.2	0.2	0.7	0.7	0	0	0.2	0.1	0.2	0.2	0.7	1.1	1	0	0	0	1.5	0.4	0.3	0.4	0.8	0.6	0.5	0.6	0.3	0.5	0.5	0.3	0.4	0.2	0.8	0.7	0.6	0.9
chrX	9610503	9616967	C11E4.6	9.6	6.3	9	10.5	2.8	2	2.8	2.8	2.6	2.6	8.2	8.2	6.4	9.1	11.2	0.4	0.2	9.5	2.5	4	2.5	2.5	3	2.8	0.3	0.3	2.6	5.2	7.7	8.3	19.1	9.9	8.8	10.3	8.5	29.3	33.4	43.1	42.6	11.9	21.3	19.9	11.3	32.1	22
chrX	9617189	9618751	C11E4.7	0.4	0	0	0.4	10.2	9.4	6.7	6.4	10	5.6	0.4	0.2	0	0	0.1	0	0	0.1	7	9.6	6.5	3.3	20.6	12.6	0	0	5.6	9.7	0	0	0.1	0	0	0.2	0	0.1	0	0.4	0	0	0	0.4	0.2	0	0
chrX	9623246	9624657	C11E4.8	1	1.6	1.4	1.1	0	0	0	0.1	0	0.2	1.2	0.7	0.3	1.1	0.6	0	0	0.1	0.1	0.3	0	1.1	0.1	0.2	0	0.1	0	0.7	0.2	0.3	1.2	0.6	0.8	1.5	0.5	0.2	1.2	1.1	0.8	0.1	0.1	2.5	1.2	2	1.4
chrX	15157287	15158547	C11G10.1	16.8	10.3	13.4	27.4	2.7	2.7	4.6	3.7	2.6	2.5	10.5	10.3	5.4	8.6	6.1	0	0	5.4	2.6	5.2	2.8	14.9	9.2	7.1	0	0	2.5	10.1	15.8	1.7	5	19.3	12.2	9.4	8.3	1.6	1.7	4.8	3.9	0.7	2.9	13.4	13.9	4	2.9
chrX	15141934	15142334	C11G10.2	36.2	15	20	11.3	1.1	1.1	2.1	1.4	1.3	0.3	10.2	6.2	12.2	18	22.5	0	0	12	0.5	3.5	1.5	5	4.3	5.9	0	0	1.5	4.3	22.3	4	5.9	17.9	15.2	12.8	16.6	7.4	15.3	9.8	13.1	5.1	12	35.6	63.9	13.6	13.6
chrX	16332367	16335868	C11G6.1	4.9	5.1	6.2	5.3	5.4	6.8	5.1	6.9	6.2	7.7	2.9	3.9	3.8	5	5.3	43.1	45.4	4.6	6.6	5.1	5.9	1.9	2.3	1.7	50.9	46.6	6.7	2.1	4.8	60.9	30.1	6	6.9	5.3	4.9	34.4	24.2	25.9	28.8	39.8	63.1	5.8	10.4	30.7	33.2
chrX	16329144	16329925	C11G6.2	0	0	0	0	0	0.2	0	0	0	0.1	0	0.1	0	0	0	8.6	8.4	0	0.1	0	0	0	0.2	0.1	8.2	11.4	0	0	0	6	5.3	0	0	0	0.2	2.5	0.5	1.1	1	2.7	4	0	0	2.4	3.5
chrX	16340640	16345955	C11G6.3	18.6	13	25.2	11.4	11.7	12.5	9.7	12.5	12.2	11.5	6.7	8.9	9.1	13.3	12.1	85.8	76.8	10.5	13.6	13.3	13.5	5.5	5.8	4.3	90.3	81.4	12.3	4.2	14.5	86.3	50.8	14	11.6	6.3	7.5	56	46.4	40.2	47.4	62.8	103.5	20	30.8	52.3	51
chrX	16354903	16359582	C11G6.4	5.1	7.7	8.4	6.5	4.9	2.9	3.9	4.3	4.1	4.4	6.3	7.2	6.1	6.8	6.5	12.6	11.9	5.4	3.9	5.4	3.6	7.4	9.1	6.8	11	10.8	4	11	8.5	20.3	13.8	11.3	8.2	5.7	7.1	15	13.2	18	18.9	13.5	22.9	6.6	13.8	12.9	12.5
chrX	14304862	14307697	C11H1.2	4.9	2.8	4.9	3	2.5	2	1.3	2.4	1.5	2.7	5.8	4.7	2.8	2.5	3.4	8.2	7.8	1.4	1.1	1.1	1.4	0.9	1.7	1.5	7.2	7.4	1	2.4	4.8	18.1	8.2	7.8	5.9	4.5	3.8	8.9	9.1	11.7	14	12.2	17.2	3.7	5.3	6.2	6.9
chrX	14307792	14311613	C11H1.3	19	12.2	21.1	18.6	6.4	5.7	5.8	7.6	6	8.2	19.8	19.2	13.8	13.1	14.9	25	25.8	14.8	5.2	5.3	5.1	6.5	6.3	5.6	25.7	25.6	4.7	7.7	21.4	47.3	31.1	24.8	25.3	14.1	15.8	36.3	29.3	40.9	37	32.4	58.9	17.5	22	28.2	23.8
chrX	14313650	14326730	C11H1.4	9.5	4.3	8.2	7.4	1.2	1.2	1.7	2.4	1.7	2.6	4.8	7.3	4	6.1	7.5	5.4	5.4	7.4	1.6	2.3	2.4	2	1.8	1.4	5.2	4.5	2	1.2	7.1	8.1	8.5	4.9	8.4	6.7	5.8	5.6	4.3	6.8	5.3	8.4	10.5	1.9	7.5	6.7	5.5
chrX	14298020	14303070	C11H1.5	11.9	5.4	9.9	37.8	0.9	0.2	1.4	1	0.3	0.9	32.6	32	16.6	17.9	19.1	0.3	0.2	16.6	0.3	2.8	0.1	0.3	0.3	0.2	0.2	0.2	0.3	0.2	33.8	0.3	0.3	22	34.2	21.4	15.5	0.2	0.1	0.3	0.5	0.2	0.5	4.1	6.4	0.2	0.6
chrX	14327547	14330125	C11H1.7	1.4	2	3.6	2.7	0.4	0.8	0.7	0.6	0.3	0.9	2.4	1.9	2.4	1.8	1.7	2.1	2.6	1.1	0.2	0.6	0.6	1	1.3	1.1	3.1	2.9	0.5	2.6	2.4	12	13.4	1.5	2.5	2.5	1.9	11.6	14.5	17.9	16.9	10.9	18.1	4.5	4.3	18.3	17.1
chrX	14295751	14296586	C11H1.8	9.6	10	11.7	12.1	16.5	19.1	16.1	16.3	17.4	18.8	9.4	8.8	11.8	11.5	12.6	95.7	90.1	9.2	17	15.3	13.2	7.3	6.8	5.8	99.8	89	16.2	7.6	14.9	94.3	57.1	18.8	18.6	9.2	12.8	54.4	50.3	49.9	43.1	83.3	98.3	15.5	25.8	47.3	57.5
chrX	14318062	14320328	C11H1.9	28.6	13.2	27.7	52.6	3.1	4	3.4	5.4	5.2	4.9	48.4	41.5	35.8	50.5	52.5	3.8	3.1	52.5	5.8	6.4	6.4	5.5	4.2	4.5	4.2	4.3	5.2	4.8	36.8	33.8	35.1	43.5	73.8	53.4	40.8	32.4	34.3	37.6	33.4	21.9	50.7	36.7	68.3	40	29.5
chrI	9320352	9322503	C12C8.1	14.1	12.2	10.7	5.5	18.8	8.4	2.5	6.6	8.9	5.7	6.1	5.2	0.6	14.7	6.8	0.1	0	2	2.7	4.1	5.6	18.7	23	1.2	0.4	0.3	4.1	5.5	29.8	14	459.2	7.1	19.6	23.2	62.9	2.4	5	2.5	1.9	96.8	2.1	1.1	1.6	11.5	10.6
chrI	9327848	9330922	C12C8.2	10.8	5.2	11.3	11.7	21.6	17.5	17.4	15.2	15.5	17.6	21.7	20.5	18.3	18.3	24.5	0.7	0.2	9.4	17.6	10.8	22.5	9.2	58.4	50.5	0.2	0.2	18.4	43.6	24.2	6.1	4.5	19.3	25.4	15.9	21.6	4	5.7	9.3	9.7	2.7	9.9	11.3	28.5	5.3	4.8
chrI	9335763	9342488	C12C8.3	58.1	54.1	60.1	49.7	82.3	100.5	77.2	93.8	90.3	97.3	29.4	28	45.9	60.4	51.7	3	2.3	44.5	77.9	60.7	71.8	6.3	7.6	6.6	3.2	3	71.8	7.3	42.9	6.3	11	44.2	54.6	53.9	44.2	4.1	5.3	5	8.4	2.2	3.8	51.4	73.3	5.8	5.9
chrX	3499239	3505240	C12D12.1	244.7	179.6	238.8	113.7	130.3	106.8	128	88	104.7	78.5	142.8	131.5	169.8	128.9	198.5	0.7	0.1	140.8	139	302.1	105.7	74.5	120.8	122.5	0.2	0.2	107.2	79.5	187.6	12.3	23.1	144.9	171	198.1	196.5	36.3	48.3	47.5	54.3	23.5	24.7	247.2	191.3	41.9	41.5
chrX	3496012	3499156	C12D12.2	71.9	102.4	88.8	87.7	71.6	60.2	72.8	51.7	52.3	54.3	127.4	117.8	165.6	140	133.1	0.2	0.4	72.6	47.3	56.6	61.6	95.5	89	88	0.2	0	58.1	115.4	132.4	3.2	15.6	126.6	108.4	98.4	125.4	2.6	10.1	11.4	24.3	0.6	5.2	107.4	202.1	16	10.4
chrX	3489279	3491142	C12D12.3	0.3	0.5	0.8	0.9	0.4	0	0.6	0.5	0.7	0.8	0.7	1.2	0.8	1	0.5	0.5	0	0.4	0.1	0.5	0.3	0.2	0.6	0.2	0	0	0	0.3	1.3	1.7	2.5	0	1.1	1.1	0.4	1.6	4.3	3.6	2	2.1	2	0	0.3	2.4	1.2
chrX	3486295	3486825	C12D12.4	0	0	0	0.5	0	0	0	0	0	0	0	0	0	0	0	0	0	0	0	0	0	0	0	0	0	0	0	0	0	0	0	0	0	0	0	0	0	0	0	0	0	0	0	0	0
chrX	3505426	3506352	C12D12.5	4.9	6.4	8.5	3.1	4	3.3	3.9	2	3.5	2.9	3.2	3.2	3.4	5.7	6.4	0.3	0	4.2	2.8	4.2	3.4	3.4	7.5	7.1	0.2	0.1	2.2	6.4	6.2	2.3	7.5	7.2	7	7.5	12.1	9.3	12.4	10.4	11.3	2.6	6.2	5.7	7.2	10.4	5.8
chrV	7692071	7693469	C12D5.10	0.5	0.3	0.2	0.8	0.2	0.2	0.1	0	0.1	0.2	0.4	0.4	0.1	1.2	0.7	0	0	0.1	0.2	0.1	0	0.1	0.3	0.3	0	0	0.2	0.1	1.1	0	0	0	0.8	0.6	0.4	0	0	0	0	0	0.1	0.3	0.6	0	0
chrV	7681800	7683938	C12D5.11	0.1	0	0.1	0.1	0	0	0	0	0	0.1	0.1	0	0	0	0	0	0	0	0	0	0	0.1	0.1	0	0	0	0	0.1	0	0.1	0	0.6	0	0	0	0	0	0.1	0	0	0	0	0.1	0.1	0.3
chrV	7686362	7688140	C12D5.2	1.1	0.8	1.2	0.7	0.8	0.7	0.9	0.5	0.9	0.8	0.9	1	0.8	0.7	0.6	1.5	3.6	0.2	0.4	0.4	0.4	0.8	0.5	0.3	1.3	2	0.4	0.9	2.3	7.4	6.7	1.1	0.7	1	0.7	5.3	6.9	8.2	4	8.5	8.3	2.2	0.7	8.3	7.9
chrV	7676184	7676944	C12D5.3	6.2	3.9	4.3	6.1	1.7	0.8	1	0.5	0.1	0.2	5.7	2.1	5.6	7.3	17.1	0	0	5.5	0.5	1.5	0.6	3.3	3.5	3.5	0	0.2	0.3	4.9	15.9	0.3	1.5	7	12.3	13	11.6	1.4	1	1.7	0.7	1.7	0.5	4.6	8.6	0.9	0.7
chrV	7672069	7673027	C12D5.4	1	1.4	0	1.9	0.1	0.3	0.3	0.2	0	0	0.7	0.2	1.3	3.4	3.9	0.6	0.7	3.9	0	0.1	0.3	0.6	1.6	1	0	0	0.4	1.6	4.4	0.1	0.5	1.7	5.6	2.6	1.6	1.2	0.6	0.3	0.3	0.9	0.1	2.7	4.5	0.3	0.4
chrV	7668220	7668967	C12D5.5	5.7	5.9	3.3	8.4	1.1	0.4	1.1	0.3	0.5	0.2	3.6	3.6	3.4	9.2	13	0	0	9.1	0.6	1.2	0.7	6.1	3	2.6	0	0	0.3	6.5	8.1	0.2	0.1	5.4	10	10.4	13.9	0.6	0	0.4	0.6	0.2	0.5	2.8	6.3	0.5	0.6
chrV	7679294	7681518	C12D5.7	12.6	6.6	13.4	6.2	48.9	11.6	3.7	82.6	6.5	64.9	6.7	7.3	6.1	7.6	5.5	1.5	1.2	5.7	4	4.4	4.1	173.4	108.8	65.4	1.8	1.2	3.8	7	7.2	6.3	9.1	5.6	241.6	56.5	3.7	5.7	5.9	6.8	9	7.2	6.1	182.9	58.6	8.9	7
chrV	7684320	7686316	C12D5.8	3	3.5	3.2	2.3	0.7	1	1	0.9	0.9	1	2.6	3	2.7	2	2	0.9	0.7	0.8	0.8	0.9	0.7	0.7	0.6	0.6	1.3	1.6	1.1	1.2	0.8	4.4	8.2	2.7	3	3.1	2.1	3.8	4.2	5.6	5.5	5.1	4.9	2.7	1.9	7.9	10.1
chrV	7688313	7689957	C12D5.9	2.1	2.3	2.5	5.8	1.9	1.3	2.3	1.2	0.7	1.2	5	4.2	3	6.1	4	0	0	2.2	1	1.2	1.2	4.5	3.4	3.3	0	0	1	5.9	6.6	0	0.1	3.4	3.6	3.8	4.4	0	0	0	0.3	0	0	1.8	2.7	0	0
chrV	10236132	10238836	C12D8.1	53.2	61.2	70.8	57.8	67.5	78.9	70.6	101.9	96	99.2	58	58.4	63.5	76.1	56.3	107.4	128.5	50.1	86.3	77	84.8	60.2	49.2	51.4	108.9	123.1	85.9	59.6	55.6	190.8	122.2	55.6	67.1	58.2	57.8	173.2	148.1	143.8	162.1	185.6	186.1	69.6	67.8	167.7	145.6
chrV	10248879	10252870	C12D8.10	76.8	58.5	82.7	87.7	91.1	74.5	82.1	76.7	72.7	85	60.2	66.2	42	55.5	36.9	152.8	151.8	42.7	63.7	54.4	57.4	61.1	53.2	51.5	170.5	153.4	51.3	59.2	67	97.1	90.3	56.7	44.2	37.6	31.4	69.6	51.3	70.3	66.6	76.4	72.3	48.2	33.2	69.8	57.2
chrV	10252796	10255032	C12D8.11	45.3	39.8	78.9	37	45.5	39.9	43.5	43.3	40	49	47.2	46.4	55.3	34.7	36.8	19.3	14.5	30.7	31.6	28.9	33.7	67	29.4	32.7	20.3	18.2	30.7	41.3	42.6	15.1	49.9	39.2	44.1	46	47.9	17.3	13.5	17.1	18.5	15.9	21.8	37.8	52.7	51.5	42.7
chrV	10231681	10233389	C12D8.12	0.2	0.1	0.1	0.1	0.2	0.1	0.2	0.1	0	0.1	0.1	0.3	0	0.3	0.1	0	0	0	0.2	0	0	0.2	0.1	0.1	0.1	0.1	0.2	0	0.4	0.2	0.4	0.3	0.1	0	0.3	0	0	0.1	0	0	0	0.1	0	0.2	0.1
chrV	10219428	10220444	C12D8.13	0.5	0.3	0.1	0	0	0	0	0	0	0	0	0	0	0.1	0.1	0	0	0	0	0	0	0	0	0.1	0	0	0	0	0.3	0	0	0	0	0.2	0	0	0	0	0	0	0	0	0	0	0
chrV	10228025	10228379	C12D8.14	33.4	149.1	62.7	24.7	25.8	4.3	15	8.6	7.6	13	67.2	50	141.9	127.4	28.7	0	0	27.4	5.1	24.6	6	1.9	3	1.5	0	0	4.3	5	26.5	2.4	17.5	89	60.4	56	63.2	4	19	28.4	73.9	0.4	3.7	46.1	133.3	26.4	15.4
chrV	10228690	10229215	C12D8.15	1.9	0.3	0.9	1.3	0	0	0	0	0	0	0	0	0.4	0.6	0.3	0	0	0.5	0	0	0	0.4	0	0	0	0	0.4	0.2	1.2	0	0.3	0	2	2.9	1.1	0.4	3.1	1.5	3.1	0.4	0.2	0	1.4	0.9	1
chrV	10229785	10230108	C12D8.16	14.1	95.3	28.6	8.4	11.8	3.4	8.4	6.1	5.6	10	29	26.8	56.2	40.6	11.6	0	0	9.5	2.6	12.8	5.1	0	0.5	0.3	0	0	2.9	1.1	3.4	0	4.1	22.2	9.7	16.2	22.5	0.8	1	1.2	12.4	0	0.5	12.2	30.9	3.1	0.8
chrV	10231241	10231510	C12D8.17	24.2	162.3	49.4	13.7	40.4	6.9	17.4	6.8	10.1	10.3	34	28.8	86.6	50.7	25.4	0	0	15.1	9.1	28.6	8.6	2.7	2.6	3	0	0	7.8	7.4	7.3	2.2	6.7	13.5	23.8	34.4	42.1	1.2	5.9	7.5	40	0	2	19.3	48.7	6.3	0.8
chrV	10221010	10221391	C12D8.18	1.8	22	8.2	4.8	13.2	4.7	7.7	1.9	2.5	2.3	11.5	17.5	26.8	10.9	7	0	0	4.4	5.7	10.8	6	1.4	6.3	3.7	0	0	5.2	7.7	1.1	0.1	1.1	6.8	7.4	6.8	6.6	0	0.6	1.1	3.5	0	0.3	7.3	15.3	0.8	0
chrV	10221635	10221937	C12D8.19	29.3	88.9	52.2	12.1	29.5	6.3	17	6.4	7.1	5.1	24.5	23.3	78.2	27	15.7	0	0	10.1	12.4	21	9.1	2.8	8.3	5.8	0	0	13.2	13.7	9.4	0.3	1.7	12.7	10.1	20.7	21.2	0	3.2	2.5	10.7	0	0.7	9.9	41	1.9	0.2
chrV	10222280	10223495	C12D8.20	0	0	0	0	0	0	0	0	0	0	0	0	0	0	0	0	0	0	0	0	0	0	0	0	0	0	0	0	0	0	0	0	0	0	0	0	0	0	0	0	0	0	0	0	0
chrV	10240547	10241163	C12D8.21	4.3	0	3.3	1.5	0.9	0	1	0	0	0	2.9	1.5	0	0	1.5	0	0	1.6	95.2	0.8	0.8	2.6	0	0	0	0	0	2.4	0	4.2	9	0	0	1.2	0	1.5	1.7	6.3	6.3	0	8.1	2.1	1	9.2	2.2
chrV	10226858	10227408	C12D8.4	0	0	0	0	0	0	0	0.3	0	0	0	0	0	0	0	0	0	0	0	0.2	0	0	0	0	0	0	0	0	0	0	0	0	0	0	0	0	0	0.3	0	0	0	0	0	0	0
chrV	10223420	10225696	C12D8.5	4.7	1.3	6	3.5	9.9	6.9	5.3	6.2	5.8	6.4	4.8	4.7	7.2	5.2	6.1	0	0	4.3	5.6	6.4	5	7.1	16	14.7	0	0	5.1	18.8	4	0.5	0.8	4.9	6.3	6.1	8.2	1	1	2.6	0.8	0.9	0.9	2.8	6.6	1	1.2
chrV	10239620	10240160	C12D8.6	9.3	53.3	12.9	10.7	21.9	5.3	10.8	7.3	8.1	5.3	20.6	21.4	54.7	37.8	14	0	0	12.7	6	20.6	5.1	1.4	2.8	1.9	0	0	5.3	5.2	4.8	0.5	7.4	13.4	12.7	22.1	22.3	1.3	4.6	3.4	20.7	0	1.7	17.4	39.6	5.9	1
chrV	10241758	10242693	C12D8.8	0.2	0	0	0	0.2	0	0.2	0.2	0.1	0	0.1	0	0	0.1	0	0	0	0.1	0.1	0.3	0.1	0	1.1	0	0	0.1	0.1	0	0.2	0	0	0	0	0	0	0	0	0	0	0	0.3	0	0	0.1	0.1
chrV	10242829	10243153	C12D8.9	0	0	0.8	0	12.1	6	15.7	8.3	2.5	6.8	0	1.1	1	0	0.4	0	0	1.2	2.8	15.2	6.5	164.5	132.6	143.4	0	0	2.8	184.4	0	0.6	1.4	0	1.2	0	0	0	0	0	0	0	1.7	0	0	1.1	0
chrII	1350691	1355645	C13A10.1	2.3	3.7	4.8	0.7	2.2	1.8	1.6	2.1	2.1	1.9	1.8	1.3	2.4	2.5	2.4	0	0.4	1	1.5	1.5	1.4	1.3	2	2.1	0.1	0.2	1.1	4.1	1	0.3	0.5	1.9	1.7	2.4	2.2	0.2	0.6	0.9	1.8	0.2	0.1	2	3	0.6	0.6
chrII	1357183	1358014	C13A10.2	8.2	17.8	7.4	16.9	5.9	3	7.9	5.6	2.3	4.4	10.3	12.1	8	40.1	16.4	2.6	1.7	11	2.7	3.2	3.3	15.1	20.6	17.3	1.5	2.3	3.4	21.2	12.7	1.7	12.4	12.4	16.1	13.4	17.9	3.3	14.3	8.6	12	1.8	2.6	16.4	10.5	17	13.1
chrV	7289008	7291813	C13A2.1	0	0.2	0.1	0	0.1	0	0.1	0	0.1	0.1	0.1	0.1	0	0.1	0.1	0	0	0	0	0.1	0	0	0	0.1	0	0	0	0.3	0.3	0	0.1	0	0.2	0.1	0	0.1	0	0.2	0	0	0.2	0.2	0.2	0	0.1
chrV	7273812	7274888	C13A2.10	0.2	0	0	0	0	0	0.1	0	0	0	0	0	0	0	0	0	0	0	0	0	0	0	0	0	0	0	0	0	0	0.1	0.2	0	0	0	0	0.2	0.1	0.3	0.3	0	0.1	0	0	0.2	0.2
chrV	7280856	7281954	C13A2.11	0	0	0	0	0	0	0	0	0	0	0	0	0	0.1	0	0	0	0.1	0	0.2	0	0	0	0	0	0	0	0	0	0.1	0.1	0	0	0	0	0	0	0.2	0.1	0	0	0	0	0.4	0.6
chrV	7258789	7260139	C13A2.12	0	0.2	0	0.1	0.1	0	7	0	0	0	0.2	0.2	0.1	0	0.1	0	0	0	0	2.7	0	0	0	0	0	0	0	0.1	0	0.1	0.2	0	0	0.1	0.2	0.1	0	0	0.2	0	0.1	0	0.1	0.1	0
chrV	7286166	7287381	C13A2.2	0	0	0	0	0	0	0	0	0.1	0	0	0	0	0	0	0	0	0	0	0	0	0	0	0	0	0	0	0	0.3	0	0	0	0	0	0	0	0	0	0	0	0	0	0	0	0
chrV	7282335	7284738	C13A2.3	3.7	0.6	2.5	1.1	0	0	0.2	0	0	0.1	0.6	1.1	0.4	0.3	0.5	0	0	0.6	0	0	0	0.1	0	0	0	0	0	0	0.2	0	0.3	1.6	1.4	1.2	0.8	0.4	0.4	0.6	1.1	0	0.2	1.5	0.6	0.4	0.3
chrV	7279291	7280512	C13A2.4	0	0	0	0	0	0	0.2	0	0	0	0	0	0	0	0	0	0	0	0	0	0	0	0	0	0	0	0	0	0	0	0	0	0	0	0	0	0	0	0	0	0	0	0.1	0.1	0.1
chrV	7275772	7278506	C13A2.5	0	0	0	0	0	0	0.1	0	0	0	0.1	0	0	0	0	0.1	0	0	0	0	0	0	0	0	0	0	0	0	0	0	0.1	0	0	0	0	0.2	0	0.1	0.2	0	0.2	0	0	0.2	0.1
chrV	7269712	7272769	C13A2.6	0	0	0	0	0	0	0.2	0	0	0	0	0.1	0	0	0	0	0	0.1	0	0	0	0	0	0	0	0	0	0	0	0	0	0	0	0	0	0	0	0	0	0	0	0.1	0	0	0
chrV	7266334	7268788	C13A2.7	0	0	0	0	0	0	0.1	0	0	0	0	0	0	0	0	0	0	0	0	0	0	0	0.1	0	0.2	0.4	0	0	0.2	0	0	0.3	0	0	0	0	0	0.1	0.1	0.1	0.1	0	0.1	0	0.1
chrV	7262546	7264028	C13A2.9	0	0	0	0	0.1	0	0.5	0	0	0	0	0.1	0	0	0	0	0	0	0	0	0	0	0	0	0	0	0	0	0.2	0	0	0.4	0	0	0	0	0	0	0	0	0	0	0	0	0
chrII	14470296	14479551	C13B4.1	11.8	7.2	10.7	4.7	21.8	22.1	19.8	26.6	22.3	23.6	7.9	8.4	8.8	7.2	5.8	9	12.4	3.6	15.5	13.4	15.7	15.4	11	8.8	10.6	10.3	14.3	16.5	4.5	8.9	8.3	6.3	6.5	7.1	6.5	8.8	6.8	8.3	12.5	9.2	7	6.7	6.6	6.4	6.4
chrII	14485548	14488615	C13B4.2	75.3	28.4	70.6	66.2	113.1	127.2	109.5	128.6	122.8	130.4	68.6	71.7	54	44.3	52.8	313.4	293	53	116.2	94.1	119.5	86.1	88.5	88.9	308.3	286.7	111.5	84.6	69.5	162.1	108	57.1	63.7	69.8	55.2	97.5	57.6	59.3	67.8	119.8	108.3	65.2	53.4	63.2	90
chrV	2435723	2437783	C13B7.1	0	0	0	0	0	0	0	0	0	0	0	0	0	0	0	0	0	0	0	0	0	0	0	0	0	0	0	0	0	0	0	0	0	0	0	0.1	0	0	0	0	0	0	0	0	0
chrV	2431803	2434724	C13B7.2	0.1	0.1	0.1	0.1	0	0	0	0.1	0	0	0.1	0	0	0	0	0	0	0	0	0	0	0	0	0	0	0	0	0.1	0	0	0	0.4	0	0	0	0	0	0	0	0	0	0.3	0	0	0
chrV	2419079	2421582	C13B7.3	0.1	0.1	0	0	0	0	0.1	0	0.1	0	0.1	0	0	0	0	0.1	0	0	0	0.1	0	0.3	0.1	0	0.4	0.5	0	0.1	0	0.1	0.2	0	0.1	0	0	0.1	0.1	0	0.1	0.3	0	0.2	0.1	0.1	0.1
chrV	2423285	2426205	C13B7.4	0	0.1	0	0	0.1	0	0	0	0	0	0	0.1	0.2	0	0.1	0.3	0.2	0	0	0.2	0.1	0	0.1	0.2	0.2	0.2	0	0.3	0.1	0.1	0.5	0	0	0	0	0.3	0.1	0.1	0.2	0.4	0.1	0.1	0	0.1	0.3
chrV	2426477	2428123	C13B7.5	0	0	0	0	0.1	0	0	0.1	0	0.1	0.1	0.1	0	0	0	2	1.6	0.1	0.3	0	0	0	0	0	1.5	1.5	0.1	0	0	0.1	0.1	0	0.1	0	0	0.2	0	0	0	0.1	0.2	0	0	0.1	0.2
chrV	2421865	2422894	C13B7.6	81.8	28.3	73.6	10.8	53.5	57.4	59.7	54.5	62.8	51.5	25.9	31.8	31.4	12.1	14.7	92.6	89.1	13.6	98.6	95	88	72	60.6	53.8	84.7	79.9	87.1	66.2	13.3	30.5	26.7	15.8	11.8	15.4	12	31.5	24	18.4	17.1	28.2	29	13.5	16	22.3	24
chrIII	6620213	6622156	C13B9.2	1.2	4.6	1.7	1.1	6.2	5.5	4.6	7.2	6.1	7.5	2.2	2.3	1.3	5.7	1.4	8.5	6.1	1.1	4.9	4.2	5.2	3.6	3	2.2	7.9	8.2	4.3	6	2.4	6.3	7.1	2	1.6	1.4	2.1	5.1	2.2	3.3	3.7	4.9	5.2	1.5	1.4	2.9	6.4
chrIII	6622601	6624919	C13B9.3	68.5	32	71	78.1	59.1	55.6	57.9	59.4	57.3	64.8	81.8	83.1	59	57.2	62	55.2	56.6	61.1	45	48.1	43.3	81.9	70.2	64.6	53.6	56.1	40.2	88.2	79.4	94.7	84.3	73.8	77.6	75.2	67.5	86.1	81.6	108.1	86.5	88.8	87.4	74.4	55.1	94.8	85.6
chrIII	6632787	6652030	C13B9.4	10.4	11.9	10.9	10.6	2.8	2	2.8	2.1	2.2	3.1	10.4	11.3	9	16.9	13.6	0.6	0.7	8.7	2.9	3.5	2.7	4.2	4.7	4.4	0.7	0.9	2.9	7.4	10.7	2.3	9.1	8.5	12.1	12.9	13.5	5.5	7.8	9.1	13	2.6	3.8	16.5	17.1	9.4	5.3
chrV	12514856	12515667	C13C12.1	22.6	13.1	27.2	16.4	9	3.5	5.9	6.4	5.2	5.8	24.7	24.9	24.7	23	22.4	0	0	16.5	4.6	7.1	5.9	14.8	13.4	13.2	0.6	0.5	5.9	22.2	18.8	2.8	12	20.6	16.5	14.2	17.3	7.6	13.6	9.2	10	2.9	5.2	18.9	15.3	13.8	9
chrV	12523627	12525637	C13C12.2	27.3	7.9	25.3	22.4	1	0.2	1.2	0.8	0.6	1.1	25.3	25	14.8	11.5	12.5	5.1	4.3	11.9	0.3	1	0.1	0	0.1	0	3.4	3.7	0.4	0.2	22.9	9.9	13.5	21.1	17.7	16.3	12.1	21.3	19.5	24.8	20.5	11.2	18.1	29.6	9.9	16.6	13.6
chrV	12101749	12106488	C13C4.1	3.6	1.8	3.6	1.9	1.3	0.7	1.1	0.8	0.7	0.7	2.2	2.1	1.8	1.6	1.8	0.3	0.3	0.3	0.4	0.6	0.5	1	1	0.9	0.2	0.3	0.6	1.2	2.2	0.7	1.5	2.6	1.7	1.5	2.2	0.9	1.7	2.2	2.2	0.9	0.9	2.1	1.8	1.8	1.3
chrV	12101266	12103267	C13C4.2	6.1	5.1	8.3	6.2	3.6	3.2	3.1	2.9	2.6	3.3	4.2	4.3	4.4	7.9	6.1	5.6	6.6	3	1.7	2.2	1.7	2.6	2.1	1.7	5.5	4.6	2.5	3.1	6	8.1	18.4	6.7	6.5	5.5	8.8	8.9	10	14.3	12.7	15.3	10	10.4	5.8	18.2	13.7
chrV	12107122	12109118	C13C4.3	4.4	2.7	5.4	3.4	1.4	0.8	1	0.9	1	0.9	3.8	4.2	2.7	3.6	3.5	0.7	0.8	1.7	0.6	0.9	0.7	2.7	1.4	2	0.6	0.6	0.5	3.6	4.2	2.8	5.3	3.6	4.2	4.5	4.9	2.5	3.1	5.2	5.7	2	3.4	2.5	2.5	6	3.6
chrV	12109145	12110959	C13C4.4	1.9	2.1	2.5	2	1.3	2.1	2.4	2.4	1.6	3.4	1.6	2.4	1.9	1.8	2.1	7.4	9.5	1.8	1.8	1.8	1.2	14.2	10.2	11.2	9.2	7.8	1.9	13.5	3	11.7	10.5	1.4	2.1	1.6	1.3	7.4	7.5	9.5	12.3	4.6	10	0.9	1.2	10.8	10.4
chrV	12114971	12117542	C13C4.5	10.3	12.5	13.3	8.3	8.5	6.2	5.3	5.4	9.1	6.1	13.8	11.2	13.2	14	16.9	0.9	0.9	8.8	4.6	7.5	5.5	15.5	17.1	16.6	1.2	1	5.4	22.2	7.4	5.9	9.6	6	11.3	13.7	18.1	10.1	12.7	14.5	14.8	6.6	8.4	14.7	20.2	12.2	9.4
chrV	12121649	12125077	C13C4.6	1.6	1.3	1.7	0.4	0.9	1	0.8	1.1	0.5	1	0.9	0.8	1	0.7	0.8	1	0.5	0.3	0.4	0.6	0.4	1.7	1.3	1.8	0.8	0.8	0.2	2.5	1.8	0.3	0.7	1.6	1.2	1	1.2	0.3	0.1	0.1	0.3	0.1	0.1	0.9	0.4	0.2	0.2
chrV	12118972	12120795	C13C4.7	3.2	2.1	5.1	4.4	1.6	0.6	1.4	1.1	1.2	1.4	3.2	3.7	2.5	6.2	3	0.3	0	1.6	0.6	1.7	0.9	4.1	3.7	3.2	0	0.2	0.6	5.1	5.9	0.1	3.6	6.7	3.2	3.3	4	0.8	2.3	1.7	2.4	0.5	1.2	5.7	3.3	2.4	2.3
chrV	12117998	12118968	C13C4.8	0.2	0	0	0	0	0	0.1	0	0.1	0	0	0	0	0	0	0	0	0	0.1	0	0	0.2	0.5	0.1	0	0	0	0.1	0	0	0	0.4	0	0	0	0	0	0	0	0	0	0	0	0	0.1
chrV	5012978	5015197	C13D9.1	3.5	0.8	2.2	0.6	0.3	0.5	0.5	0.1	0.3	0.3	0.5	0.5	0.3	0.4	0.7	0	0	0.4	0.6	0.3	0.3	1.1	0.7	1.5	0	0	0.5	1.6	5.6	0.4	2.7	2	1.3	1.2	2.1	0.1	0.7	0.8	1.7	0.3	0.9	1.9	1	2.1	2.5
chrV	5007213	5011713	C13D9.2	0.1	0	0.2	0.1	0	0	0.1	0.1	0	0.2	0	0	0	0	0	0	0	0	0	0	0	0.1	0.1	0	0	0	0	0.4	0.1	0	0.3	0	0	0	0.1	0	0	0	0.1	0	0	0.1	0.1	0.1	0.2
chrV	5001476	5003399	C13D9.3	0.4	0.2	0.1	0	0	0	0	0	0	0	0	0	0	0	0	0	0.2	0.1	0	0	0	0	0	0	0	0	0	0	0.2	0	0	0	0	0	0.2	0	0	0.1	0	0	0	0	0	0	0.1
chrV	4977919	4979146	C13D9.4	0	0	0	0	0	0	0	0	0	0	0	0	0	0	0	0	0	0	0	0	0	0	0	0	0	0	0	0	0	0	0	0	0	0	0.1	0.1	0	0	0	0	0.1	0	0.1	0	0
chrV	4979932	4980959	C13D9.5	0	0	0	0	0	0	0.1	0	0	0	0	0	0	0	0	0	0	0	0	0	0	0.1	0	0	0	0	0	0	0	0	0	0	0	0	0	0	0	0	0	0	0	0	0	0	0.1
chrV	4981794	4983177	C13D9.6	0	0	0	0	0	0	0.1	0	0.1	0	0	0	0	0	0	0	0	0	0	0	0	0	0.3	0	0	0	0	0.3	0.2	0.1	0	0	0	0	0	0	0	0	0	0	0	0	0	0	0
chrV	4983734	4987183	C13D9.7	1.2	1.4	1.9	1.7	0.3	0.2	0.5	0.7	0.5	0.9	3.3	3.8	5.3	3.1	3.5	0.1	0	1.7	0.5	0.5	0.4	0.8	1.3	1	0.3	0.1	0.2	1.2	3.4	0.1	0.1	2.2	3	2.5	4.4	0	0	0	0.1	0.1	0.2	1.9	3.2	0.1	0.1
chrV	4991489	4995049	C13D9.8	0.3	0.4	0.2	0.2	0.1	0.1	0.3	0.1	0.1	0.1	0.1	0.2	0.4	0.2	0.2	0	0	0.1	0.1	0.2	0	0.2	0.6	0.3	0	0	0	0.9	0.3	0	0.3	0	0.2	0.4	0.6	0	0	0.1	0.1	0	0.2	0.1	0.3	0.2	0.1
chrV	4997007	5000553	C13D9.9	1.3	0.8	1.3	1.4	1.9	1.5	1.4	1.7	1.1	1.8	1.6	1.6	2.3	1.2	2.2	0.9	0.2	1.1	0.7	1	1.1	0.7	1.7	3.1	0.5	0.7	1.2	1.4	2.2	0.7	1.6	4.5	3.1	3.4	3.6	0.5	0.3	0.5	0.5	0.3	0.6	1.5	2.3	1.3	1.1
chrX	8893075	8898464	C13E3.1	3.5	3.9	4.5	3.2	0.9	0.4	1	0.6	0.6	0.8	1.7	1.8	1.4	3.1	2.7	1	1.2	1.7	0.7	0.6	0.8	3.4	2.2	1.6	1	1.5	0.7	2.9	3.2	3.1	5.1	4.4	2.6	2.2	2.6	6.6	5.8	8.5	9.5	3.1	5.5	4.3	2.6	6.4	5.2
chrV	7223835	7225050	C13F10.1	6.2	4.5	8.2	4.4	4.1	1.7	3.1	1.8	2.8	3.5	8.1	6.7	7.1	12.8	7.4	1.7	0	3.8	2	4.3	2.4	2.7	3.8	2.5	0.8	1	0.9	5.8	9.3	8.2	13.9	4.9	6	6	7.3	18.4	28.6	33.8	28.8	16.5	11.7	15.6	11.9	20.2	18
chrV	7221460	7222039	C13F10.2	9.9	5.2	6.6	7	15.3	25.2	17.6	15.2	13.3	18.7	6.8	7.1	5.6	8.4	7.1	53.6	49.5	5.8	16.1	12	18.9	9.7	11.4	9.4	53.5	52.4	19.7	8.4	6.5	62.4	61.4	6.7	6.8	12.8	11.2	47.2	80.5	38.8	37.4	59.5	50.4	3.8	6.4	40.5	49.6
chrV	7205602	7214885	C13F10.4	18.7	11.7	21.1	15.1	21	20.7	18	22.8	21	24.6	16.4	17.2	13.1	12.8	13	62.5	57.2	12.5	15.8	12.1	16.4	12.3	13	12.4	63.2	57.9	15.2	17.7	12.1	53	36.4	12.4	15	15.4	12.9	44.9	34.8	46.8	44.6	45.7	48.4	19.5	14.4	34.8	38.1
chrV	7214998	7219022	C13F10.5	21.5	13.2	24.8	11.3	30.2	31.2	30.7	31	28.5	34.9	9.1	12.3	7.4	8.2	7.7	61.5	53.7	8.3	30	31	31.5	33.1	33.4	28.2	61.7	61.4	25.6	34.6	8.1	46.8	35.4	10	10.4	11.8	12.3	45.9	57	29	33.3	44.4	39.7	9.1	10.3	27.9	49.7
chrV	7219103	7221023	C13F10.6	7.9	4.1	9.1	5.2	38.9	37.7	31.4	40.9	36.7	44.7	6.5	7.4	5.6	5.6	4.3	85.3	77.6	2.3	25.7	19.1	27.9	11.3	10.8	8.6	84.1	79.8	21.3	11.3	4.9	54.2	40.8	9.2	4.7	5.6	3.8	36.3	25.2	35.9	34.7	39.2	44	5.9	3.9	26.8	37
chrV	7222030	7223261	C13F10.7	19.8	13.1	23.9	22.4	58.4	70	55.8	75.6	82.8	72.1	15.9	18.4	20.5	17.1	17.3	260.1	242.8	17.5	86.5	77.4	78.1	39.8	38.4	38.6	253.2	255.3	82.6	41	17.6	142.3	97.3	15.8	16.1	16.5	18.9	132.3	98.8	68.8	63.6	127.7	132.4	16.5	15.6	69.7	92
chrV	11011424	11012444	C13G3.1	15.9	5.5	16.6	31.2	11.6	12.7	21.9	4.6	8.7	5.7	13.4	7.7	8.9	35.6	29.8	0	0	10.2	12.5	24.7	9	21.3	11.2	8.7	0.4	0.6	8.2	9.7	16.5	5.6	45	20	18.9	22.7	19.6	7.3	13.2	17.8	10.7	16.2	11.4	23.5	31.7	19.5	16.8
chrV	11021042	11022855	C13G3.2	3.4	6.2	3.8	4	3.6	2	3.3	2.6	1.6	1.9	2.6	3.7	2.2	3.8	2.2	0	0	1.6	0.8	0.7	0.8	4.2	2.2	3.7	0.2	0.2	1.5	4.7	3.2	5.1	14.2	1.8	3.5	5.5	4.8	18.4	17.7	27.3	23.4	3.3	14.5	4.2	2.2	16.8	13.5
chrV	11027152	11030827	C13G3.3	43.1	30	53.1	36.5	65.8	62.4	60.9	63.6	64.2	66.6	40	39.3	35.5	39.5	31.3	61.4	68.2	28	55.6	58.5	56.6	56.1	62.8	59.6	64.5	64	51.5	71.5	38.4	63.2	50.5	35.8	29.1	29.3	30.4	48.9	41.5	48.8	55.4	77.9	54	43.2	40.9	48.2	45.9
chrIII	8622577	8625920	C13G5.1	5.9	11.1	10.6	9.3	1.3	1.6	1.3	2.6	2	1.2	4.3	4.3	7.4	25.1	16.9	15.6	24.1	9.3	1.3	1.2	0.3	0.2	1.4	0.8	16.8	20.1	0.8	0.8	10.7	49.8	35.1	11.2	10.9	8.2	13.5	31.2	43.4	39.4	43	44.3	46.6	22.5	18.4	47.2	41.8
chrIII	8616697	8618359	C13G5.2	3.8	5.7	3.8	4	29.3	36.2	28.2	40.1	34.9	38.9	6.3	5.3	4.6	3.2	2.5	49.3	42.4	1.2	30.3	22.8	29.4	9.2	10.9	10.3	51.6	48.1	27.1	10.1	2.3	27.6	26.1	6.5	5	4.1	4.7	25.5	15	12.6	14.3	19.7	18.1	1.3	2.6	18.1	23.7
chrX	2803103	2804822	C14A11.2	1.5	2.6	2.5	2.3	0.5	0.2	0.1	0.7	0.1	0.4	1.1	0.8	2.1	3.2	1.8	0.3	0	1.9	0.2	0.1	0.1	0.4	0.4	0.2	0.1	0.2	0	0.5	2.3	11.3	20.4	3.4	2.6	2.5	3.6	18	26.7	33.9	27.5	9.7	20.2	2.2	2.2	27.4	19
chrX	2785592	2799243	C14A11.3	22.9	18.7	21.3	20.3	11.2	13	10.2	11.8	11.2	14.6	18.4	17.6	15.5	12.2	12.3	29.1	30.9	13.9	9.4	7.8	9.6	8.9	7.9	6.5	30.2	31	9.3	10.9	14.2	41.6	37.4	13.4	14.2	14.5	10.9	43.2	41.6	40.7	48.2	34.8	41	28.3	16.1	38.4	36.1
chrX	2805066	2807520	C14A11.5	1.3	1.1	0.7	0.9	0	0.1	0.2	0	0.1	0.2	0.4	0.7	0.6	1.5	1.5	0	0.2	1	0	0.2	0.1	0.1	0.4	0.1	0.2	0.2	0	0.1	0.5	0.5	5.4	0.7	1.2	2.5	1.6	1.7	2.6	2.2	3	2.7	1.8	0.8	0.3	1.7	1.4
chrX	2810475	2814117	C14A11.6	2	0.9	2.5	0.2	0.6	0.5	0.6	0.1	0.6	0.4	0.5	0.6	0.4	1.3	0.9	0	0	0.7	0.6	1.1	0.7	0.9	1.5	1.2	0	0	0.7	2.4	0.4	0.6	1.2	1	0.4	0.3	0.6	1.2	0.9	2.4	2	0.4	0.9	0.8	0.7	1.4	1.4
chrX	2823281	2826819	C14A11.7	3	4.4	3.3	3.8	0.5	0.3	0.4	0.3	0.3	0.5	2.6	2	1.4	5	3.3	0	0	2.7	0.1	0.3	0.4	2.6	3	1.5	0	0.1	0.1	2.7	3.1	1	2.8	4.4	4.2	3	2.7	3.5	4.3	3.8	5.3	0.8	1.9	2.1	2.7	3.3	2.3
chrX	2807900	2809623	C14A11.9	36.8	26.2	48.7	20.5	17.3	16.1	17	16.4	20	15.2	17.1	16.8	20.8	35.9	31.6	32.6	42.7	20.5	17.8	21.8	17	11.3	11.3	9.5	32.2	34.3	16.7	14.3	23	45.2	41.6	29	26.5	25.8	29.7	46.8	55.8	55.8	59.1	67.9	44	48.9	38.8	48.5	46
chrII	10579893	10580985	C14A4.1	21.5	54	33.7	26.2	19.4	21.6	22.1	29.6	20.8	31.7	36.1	39	27.1	44.3	18.9	30.1	31.3	19.5	15.1	13.1	16.3	23.7	13.5	14.7	24.3	26.9	12.2	19.1	35.9	46.6	66.3	45.7	31.7	30.7	33.1	42.8	36.4	46.9	46.7	34.3	52.1	23.8	36.5	72.7	65.9
chrII	10604969	10605555	C14A4.10	20.9	34.6	21.1	56.8	83.2	74.5	76.4	89.7	68	100.7	55.1	44.6	33.5	34.5	39.3	152.8	143.5	35.2	86.8	69.3	88.5	67.9	77.7	72.1	167.3	147.9	77.3	62.6	34.8	134.2	157.4	30.3	42.8	57.6	52	150.9	174.2	141.2	94.9	84.2	124.4	31.9	34.2	105.9	114.7
chrII	10605658	10607566	C14A4.11	35.9	27.8	48.7	37.7	74.5	85.8	70.7	78.7	76.7	78.5	35.5	38.9	27.7	32.2	31.1	224.2	196.5	31.1	75.7	65.9	70.2	56.5	52.3	54.1	212.1	195.8	62.3	53.3	41.7	153.3	113.8	39.7	32.2	40	43.1	120.2	119.4	89	100.4	151.2	125.9	43.9	44.3	112.7	118.5
chrII	10612960	10618276	C14A4.12	8	11.5	14	5.8	2.7	2	3.4	2.7	2.4	2.5	8.8	8	10.1	9.9	7.9	0.5	0.4	3.6	1.6	3.1	2.4	5.7	5.7	5.6	0.3	0.2	1.8	13.2	9.9	4.6	7.8	10.4	7.3	6.8	9.4	9.2	8.9	14.6	12.6	6.2	10.3	13.3	12.5	14	9.6
chrII	10618411	10620445	C14A4.13	0.1	0.5	0.2	0	2.8	0.8	3.5	1.5	1.1	2.1	0.1	0.3	0.4	0.1	0.3	0.2	0	0.2	1.3	2.5	1.4	45.1	36.8	40.6	0.1	0.1	1.1	41.1	0.1	0.3	1	1.4	0.4	0.6	0.3	0.1	0.4	0.4	0.4	0.4	0.2	0.4	0.3	0.7	0.2
chrII	10582556	10584177	C14A4.14	52.9	27.3	53.8	40.5	45.6	44.4	39.5	46.2	45.2	53.5	60.9	66.4	50.7	40	54.1	15.4	13.8	54.2	39	40.5	44.6	40.2	32.3	30.9	16.5	17.7	40	35.5	33.1	22.8	24.5	44.6	52.6	50.3	45.2	27.6	27.8	29.8	25.6	18.6	26.8	29.3	40.8	22.1	22.7
chrII	10600426	10602217	C14A4.15	0	0.5	0.2	0.3	0.1	0.1	0.1	0.2	0	0.1	0.2	0	0	0.4	0.2	0	0.3	0.1	0.1	0	0.1	0.2	0.1	0	0.2	0.2	0.1	0.1	0	0.1	0.3	0	0.1	0	0.1	0.2	0.2	0.1	0	0.2	0.2	0.4	0.4	0.3	0.1
chrII	10581071	10582460	C14A4.2	54.8	28.4	68	44.6	42.7	39.1	35.6	38.2	39.5	43.5	55.6	55.9	49	47.9	58.1	11.3	13.4	49.8	32	31.5	31.7	21.2	19.9	18.1	9.9	10.7	29.3	25	41.1	22.2	25.1	39.1	55.4	49.4	55	26.2	25.6	28	31.9	22	24.3	36.7	42.8	23.5	21.8
chrII	10584284	10587874	C14A4.3	14	7.1	15.3	12.3	26.5	26.2	21.7	27.4	24.3	29.1	18.1	16.5	14.4	12.6	14.6	21.8	24.9	8.1	17.5	13.4	18.1	8.2	9.5	8	19.6	19.1	15	13.1	13.1	32.5	30.2	11.4	19.5	17.7	17.3	22.6	22.3	30.6	30.1	21.5	26.3	12.8	12.3	24	22.6
chrII	10587982	10592594	C14A4.4	27.1	14.6	31.5	14.1	34.9	34.5	32.8	40.4	36	40.7	19.7	20.7	16.6	20.7	17.4	89.7	88.3	13.3	31.1	24.4	30	15.4	15	15.2	90.5	86.1	27.1	21.5	14.5	52.3	40.2	16.5	17.3	18.2	16.6	40.7	23.7	37.6	32.2	46	52.4	21.6	23.8	25.5	34.3
chrII	10592690	10593471	C14A4.5	9.6	11.2	12.2	10.9	16.8	19.2	17.1	23.4	18.7	24.5	18.9	18.9	13.2	8.2	9.1	21.3	27.2	9	13.4	10.8	15.8	10.6	11.9	8.9	24.5	23.5	15.1	8.2	11.5	24.6	22.6	13.3	14.3	20.9	17.9	18.3	18.8	16.8	13.9	9.6	19.3	8.9	13.3	18.8	17.1
chrII	10593222	10594719	C14A4.6	15.4	16	14.9	11.9	11.1	7.6	8.2	3.9	5.8	8.2	15.3	15.5	10.5	11.8	12.8	0.5	1.4	7.2	6.6	6.9	6.6	10.6	10.9	9.2	1.6	1.7	4.1	13.6	10.6	6.3	9.6	13.1	9.9	18.6	22.7	7.4	10.3	8.6	7.1	3.5	6	7.6	9.8	8.7	6.5
chrII	10595202	10596503	C14A4.7	6.4	10.4	4.3	9.7	7.7	4.3	5.6	3.6	3.6	4.2	10.7	7.4	6.9	4.9	8.5	0.9	0.5	4.3	2	3.5	3.9	2.8	3.4	3.7	0.4	0.5	2.6	5.1	6.4	2.6	5.4	4.9	8.7	11.5	10.7	9.2	14	10.8	9.2	2.9	4.3	3.8	4.6	6.9	6.9
chrII	10597073	10598041	C14A4.8	0.6	0.2	0.1	2.9	2	0.5	2.8	1.3	1.1	1.3	1.7	1.6	0.3	0.2	0.4	0	0	1.2	1.4	1.7	1.2	33.6	27.7	28.8	0.2	0	1.2	25.7	0.2	0.1	0.2	0	0.4	0.4	0.5	0.5	0.2	0.9	0.2	0.2	0.3	0.2	0	0.2	0.4
chrII	10599270	10600470	C14A4.9	42.2	46.5	14.2	292.4	2.3	0.8	7.1	6	1.5	6.3	249.3	209.5	37.5	64.7	67.1	0.8	0	118.1	1.4	15	0.7	0.8	0	0.7	0	0	0	1.2	216.9	114.4	143.7	136	153	181.6	123.1	259.7	445.2	315.7	312.4	103.2	218.3	256.2	69.9	246.3	208.7
chrV	18157998	18159582	C14A6.1	41.5	118.8	30.8	66.7	48	29.6	71.1	36	113.5	46.2	56.6	52.6	45.5	63.5	63.5	0.3	0.3	48.6	59.3	100.1	62.9	134	179.3	184.8	0.1	0.1	61.3	184.7	96.6	0.4	0.5	48.1	51.5	47	59.7	1.6	4.1	1.2	1.6	0.8	0.3	30.4	19	0.5	1.6
chrV	18162005	18162640	C14A6.12	0	0	0	0	0	0.1	0.1	0	0.2	0	0	0	0	0	0	0	0	0	0	0.2	0	1.8	0.8	1.9	0	0	0.1	0.5	0	0	0	0	0	0	0	0	0	0	0	0	0	0	0	0	0
chrV	18159624	18161311	C14A6.13	0	0	0	0	10.9	3.5	11.8	4.4	5.1	5.8	0	0.2	0	0	0.1	0.7	0	0	4	11.7	5.9	100.8	97.5	104.9	0.5	0.3	4.2	128.7	0	0	0	0	0	0	0	0.3	0	0	0	0	0	0	0	0	0
chrV	18148782	18154368	C14A6.2	0.2	0.2	0	0	0.3	0.1	0.3	0.3	0.1	0.1	0.3	0.3	0	0.2	0.1	0.2	0	0	0.3	0.6	0.4	2.6	3.2	3.8	0	0	0.2	3.7	0.2	0.2	0.5	0.5	0.1	0	0.1	0.1	0.1	0.1	0.3	0.2	0.1	0.1	0.1	0.6	0.4
chrV	18146370	18148721	C14A6.3	0	0.1	0	0	0.1	0	0.2	0.2	0.1	0.1	0.2	0.1	0.1	0.1	0	0	0	0	0.1	0.2	0.1	0.3	0.7	0.9	0	0	0	0.9	0	0	0.1	0	0.1	0.1	0.1	0	0.1	0	0.1	0	0	0	0	0.1	0
chrV	18163463	18164800	C14A6.5	0	0	0	0.3	0.9	0.1	0.4	0.4	0	0.2	0	0	0	0	0.2	0	0	0	0	0.4	0.8	9	9.3	8.3	0	0	0.5	11.4	0	0	0	0	0	0	0	0	0	0	0	0	0	0	0	0	0
chrV	18165265	18167203	C14A6.6	0.2	0	0	0	5.8	1.9	8	4.9	4.1	4.5	0	0	0	0	0	1.7	0.5	0	3.4	8.6	5.5	84.9	83.2	87.1	0.3	0.3	3.1	92.7	0	0	0	0	0	0.1	0	0	0	0	0	0.1	0.1	0	0	0.1	0.3
chrV	18167605	18168422	C14A6.7	0	0	0	0	2.1	0	3.5	1.3	1	2	0	0	0	0	0	0	0	0	1.2	3	1.9	16.3	11	11	0	0.3	1	15.7	0	0	0	0	0	0	0	0	0	0	0	0	0	0	0	0	0
chrV	18169058	18171590	C14A6.8	0	0	0	0	1.1	1.2	1.9	0.7	1.1	0.8	0	0	0	0	0	1.1	0	0	1.5	4.4	1.3	23.6	18.2	15.2	0.5	0.8	0	22.8	0	0.3	0.3	0	0	0	0	0	0	0	0	0.2	0.2	0	0	0	0
chrIII	3699700	3701458	C14B1.1	132.1	117.8	182.9	231.5	234.5	272.7	235.1	271.1	261	284.4	311.8	313.8	337.6	199.6	294.2	405.5	394.1	193.9	219.9	216.8	229.2	487.7	472.1	487	413.6	404.8	203.6	462.9	333.9	425.9	382.5	241.8	319.5	337.3	325.7	402.1	310.6	288.5	255.3	323.3	388.1	240.4	194.9	428.1	420.3
chrIII	3709311	3713334	C14B1.10	11.9	11.8	15.9	10.2	19.6	19.5	17.8	22.8	18.8	23	15.2	14.6	10.6	13.2	10.3	32.9	33.3	10.6	15.8	11.6	16	12.8	10.8	8.5	33.3	33.5	14.2	12.2	9.2	29.8	28.3	8.4	12.4	12.1	12.5	24	16.2	20.8	19.7	28.2	23.3	12	13	17.2	20.1
chrIII	3724202	3724962	C14B1.12	5.5	3.5	6.8	4.4	44	44.1	42.3	50.6	41.5	53.2	8.2	9	6.9	3.4	3.4	28.8	29.2	2.3	35.6	26.2	37.9	37.2	31.7	30.6	25.5	28.3	31.6	37.4	7.2	22.5	27.7	6.8	4.6	5.1	4.6	36.5	19.8	12.8	12.4	17.8	16	2.8	3.9	9.7	24
chrIII	3702263	3703154	C14B1.2	2.6	2.3	3.6	3.9	74.8	96.9	69.7	98.9	78	104.4	6.1	6.6	6.4	3.4	4.3	15.7	16.7	2.5	67.6	43.4	74.2	11.6	12.8	10.7	18.8	17	64.7	11	5	19.5	26.4	1.6	5.7	7.2	7.2	22.9	18.9	11.1	8.4	11.8	15	3.1	4.7	10.2	11.6
chrIII	3703629	3705036	C14B1.3	17.5	15.6	18.9	25.5	9.9	6.5	14.4	8.8	5.6	9.4	20.9	22.5	19	15.8	18.6	8.4	7.6	10.8	5.8	8	8.3	46.6	37.6	38	9.5	7.8	7.9	47.5	25.8	10	28.8	19.3	19.6	17.6	19.6	11.9	10.8	14.3	10.9	16.4	13.2	11.3	11.2	24.8	18.6
chrIII	3705246	3706767	C14B1.4	26.7	20.3	26.9	25.9	84	92.5	77.3	90.1	84	87.5	35.6	29.1	31.6	29.5	31.4	297.3	274.5	24.2	72.3	62	72.6	23	23.2	20.2	295.2	289.2	68.9	28.1	28.1	240.1	164	23.7	32.2	32.9	36.6	136.9	103.2	117.4	118.9	198	172.5	34.3	36.3	146	161.8
chrIII	3706865	3709204	C14B1.5	10.7	12.1	9.2	10.6	16.7	16.8	14.9	18.1	15.9	22.4	16.9	16.6	10.7	12.1	10.3	38.5	48.6	7.4	12.1	8.4	12.1	8	7.6	5.6	45.4	49.8	10.1	9.2	10.6	43.3	35.1	13.7	13.8	11.9	11.7	32.3	20.9	26.3	25.3	38.4	32.8	7.8	13.6	22	23.5
chrIII	3713442	3718729	C14B1.6	7.3	6	9.6	5.5	15.6	15	15.3	18.2	17.6	19.2	8.6	8.9	7	6.1	6	17.6	16.9	3.9	14	12.1	13.5	14.3	14.9	12.6	17.7	16.5	11.5	20.2	5.1	18	15.1	5.9	5.9	6.5	6.8	16.1	11.1	14	13.9	16	13.6	5.4	5.9	10.1	10.8
chrIII	3719885	3723579	C14B1.7	2.3	0.7	2.3	1.8	28.4	31.9	27.1	30	30.9	30.3	4.6	4.6	3.4	1.7	1.6	1.9	2	1.4	26.8	21.3	26.5	16.7	16.5	18.1	2	1.8	25.6	18.1	2	2.5	2.3	1.3	2.4	3.2	2	2.6	2.2	1.5	2.1	4.3	1.6	1.2	2.2	2.4	2.4
chrIII	3718715	3719655	C14B1.8	18.8	10.1	18	11.7	39.3	33.9	33.9	43.8	39.5	38.9	11.6	13	10.8	10.6	10.8	57.5	58.7	8	31.5	31.1	31.9	25.4	28.4	23.9	61.8	55.4	29.4	33.4	13	44.5	49.5	11.9	11.9	13.3	12.1	41.3	42.9	47.5	41	59	50.4	7.3	12.3	41.6	38.8
chrIII	3725055	3726484	C14B1.9	4.1	1.6	2.3	2.3	82.4	91	72.8	89.1	86	99.2	5.4	5.1	4.6	1.9	1.4	14.6	9.1	1.1	68.2	46.4	64.6	6	7.6	8.1	17.8	13.4	59.6	8	3.4	13.7	18.3	1.9	3.4	3.7	2.6	13.2	8.3	5.8	8.4	7.8	10.3	0.2	1.9	4.4	5.6
chrV	19332695	19349458	C14B4.2	8.9	5	7	7.1	3.5	3.2	2.2	2.8	3.4	2.6	6.7	6.4	4.4	6.7	7.1	0.7	0.8	8.6	3.2	3.1	2.7	2.1	2.9	2	0.7	0.8	3	2.1	5.1	3.9	9.1	5.3	9.2	8.8	6.5	10.4	11.6	11.5	13.5	5.7	7	10.3	7.3	13.3	8.7
chrIII	8138023	8139565	C14B9.1	72.6	94.2	64.1	249.7	143.8	80.9	143.2	98.4	67.7	103.2	303.2	249.2	354.2	507.4	432.4	0.7	1.7	311.3	89.2	181.1	95.7	148	125.3	111.5	2	0.5	81.7	119.4	355.2	192.1	400.9	393.7	410.4	301	391.9	547.4	926.8	696.4	649.9	163.9	363.9	186.5	405.4	663.6	389.5
chrIII	8130795	8132376	C14B9.10	123.9	264.1	94.9	803.1	971.5	946.6	789.3	833.6	646.2	983.6	1120.2	941.5	937.6	643.3	762.8	961	972.7	609.6	912.2	826.1	935.6	1042.8	1262.7	1280.8	955.2	858.6	741.4	884.2	986.3	989.1	881.2	769.5	955.2	1388.6	1401.2	918.7	1253.6	501.7	605.1	634.6	550.8	496.8	610.6	898.5	1028
chrIII	8133598	8136583	C14B9.2	90	41.8	126.3	92.4	26	18	23	21.1	20.7	23.2	103.5	92.8	128.9	108.8	131	48.1	46.9	73.8	18.1	27.5	18.3	46.3	57.5	46	46.5	46.7	16.4	65.2	133.3	134.1	141.9	93.4	100.8	115.2	124.1	151.7	141.1	199.2	167.5	164.5	178.2	82.9	84.6	163.7	134.3
chrIII	8108723	8111198	C14B9.3	11.3	10.2	12.7	15.6	1.5	0.7	2.1	1.6	1.6	2.5	15.2	14.4	3.8	4.7	2.4	0	0	2.9	0.8	2	1.2	1.6	1.6	1.2	0.1	0.1	1.3	3.7	14	4.4	9.5	14.4	7.1	8.1	4.6	13	11.8	16.6	16.5	3.4	6.3	16.6	6.4	13.8	9.4
chrIII	8101280	8104010	C14B9.4	25.2	13.2	20.4	22	95.8	111.6	87.3	107.4	100.3	114.6	31.9	32.5	25.9	20.7	15.4	261.4	248.9	17.8	94.1	63.1	89.5	41.8	37.9	35.9	255.4	243.9	87.1	44.8	19.9	192.4	122.7	21.4	24	23.2	18.4	118.9	71.4	82.6	90.2	171.1	124.5	37	32.5	90.8	122.5
chrIII	8111099	8125409	C14B9.6	18.2	15.1	18.9	15.5	11.4	10.5	11.5	11.8	10.2	12.2	11.1	11.6	12.4	16.1	17.2	41.6	43.2	11.7	9.9	10.6	10.9	23.9	25.5	23.8	42.2	41.9	11.4	31.7	13.6	47.1	30.8	14.8	12.1	11.2	11.3	41.4	37.3	43.5	41	51	49.3	18.7	17.9	36.5	40
chrIII	8129483	8130397	C14B9.7	2163.2	3449	2463.6	5548.6	3619.5	3732.5	4044.3	4101	3872.7	4547.9	5315.7	5135	5310.5	4995.4	5509.8	642.8	805.9	5290.4	3474.9	4059.1	3256.1	2646.3	2284.8	2209.6	615.9	775.3	3153.4	2616.8	6293.9	1262.9	1450.5	5911.1	6476.9	6868.1	6677.6	1439.1	2683.3	2495.4	1927.2	1447.1	1577.8	4216.6	5722.8	1608	1294.4
chrIII	8139544	8144565	C14B9.8	13.2	9.8	17.2	10.3	15.7	13.9	13.8	16.5	15.1	16.9	12.7	14.4	12.7	13.6	11.3	13	11.4	8.9	11.3	8.8	10.5	7.8	7.2	5.9	11.2	11.5	9.7	9.9	11.5	18.8	16.4	13.9	11.6	12.1	11.1	16.9	13.4	18.5	17.3	15.3	18.8	11.9	12.3	16.9	15.4
chrV	12588408	12589602	C14C10.1	0	0	0	0	18.2	5.6	18.1	9.8	8.6	9.9	0	0	0.1	0	0	0	0	0	6.6	12.9	9.4	96.4	87.2	105.3	0.2	0.1	6	140.5	0	0	0.1	0	0	0.1	0	0	0	0	0	0	0	0	0	0.1	0.1
chrV	12590959	12592463	C14C10.2	4.8	3.9	6.1	5.2	6.4	6.2	6.5	5.8	6.9	7.1	5.8	5.7	5	5.1	5	4.6	7.4	2.5	4.6	4.3	4.8	2.4	3	2	5.9	5.4	4.6	4.3	2.8	5.1	6.8	3.8	4.6	4.3	5.4	4.8	5.5	8.6	4.4	6.1	6.6	3.6	4.4	3.8	3.6
chrV	12596370	12599135	C14C10.3	51	59.2	76.6	44.1	45	40.6	43.8	48.5	45.7	49.9	52.5	50.1	52	66.4	45.4	60.4	57.3	30.6	33.4	35.3	33.9	41.3	36	31.7	57.7	58	29	46.6	51.5	43	45.6	54	44.4	38.4	42.8	37.4	26.8	39.2	37.7	49.1	41.6	30.4	46.9	42.2	34.3
chrV	12592546	12596280	C14C10.4	34.3	20.2	44.1	28.7	40.8	36.8	35.7	39.1	38.5	40.9	35.2	37.9	32.5	37.9	38.8	8	11.5	27.6	28.3	27	27.7	21.2	20.9	17.7	8.1	9	25.1	31.1	26.4	20.9	15.9	24.1	33.7	30.5	31.2	19.2	17.9	28	26.5	19.1	24	25.2	33	20.8	17.1
chrV	12600267	12607287	C14C10.5	47.5	23.4	52.7	35.4	65.1	62.9	64.2	70.6	68.3	73.1	45	45.8	37.7	31.6	32.1	89.7	74.9	25.4	49	41.1	47.3	33	32.4	27.6	88.9	75.8	44.1	46.1	33.7	49.3	45	31	34.9	33	29.7	29.7	19.8	27.7	32	38.1	36.4	37.5	34.8	28.3	35.5
chrV	12607392	12608090	C14C10.6	3.6	2.6	6.4	5.5	9.5	9.5	7.4	7.8	8.6	9.9	6.1	6.4	4.1	5	3.5	25.6	25.6	2	5.3	5.1	6.8	1.9	2.9	2.7	23.2	23.7	4.5	4.2	7.6	31.6	24.2	6.7	4.6	5.6	4	36.6	28.8	23.8	27.6	22.6	22.3	7.5	9.6	18.4	18.9
chrV	12589692	12590637	C14C10.7	6.8	14.5	4.7	8.2	3.2	2.5	3.3	2.9	2	3.5	9.8	11.4	12.2	16.2	13.7	0.9	0	8.7	2.4	5.6	3.1	16.3	12.4	16	0.4	0	2.6	18	7.3	0.6	4.6	23	9.1	9.5	14.9	4.5	10.5	7.1	6.4	0.9	2.7	15.3	12.6	5.3	4
chrV	5663583	5665247	C14C11.1	0	0	0.1	0.2	6.3	1.7	7.2	4.3	3.2	5.8	0.4	0	0.1	0.2	0	1.6	0.4	0	2.5	6.4	4.8	59.8	48.9	52	0.8	0.6	3.4	62.6	0.2	0.1	0.4	0.3	0.1	0.1	0.2	0.4	0.1	0.2	0.3	0.2	0	0	0.1	0.1	0.2
chrV	5660911	5663480	C14C11.2	1.1	0.7	2.3	1.1	23.4	26.2	21.3	25.4	25.7	23.3	3.3	2.8	1.7	1.5	1	11	9.5	0.7	20.5	19.7	19.5	17.3	15.6	14.6	10.5	9.6	18.9	17.4	1.7	7.5	5.5	1.7	1.2	2	1.4	5	3.6	2.5	3.9	4.8	4.5	1.4	1.6	3.1	3.7
chrV	5654430	5658671	C14C11.3	42.4	26.1	53.5	23.5	11	6.1	8.5	8.5	7.7	9.2	26.7	26.4	22.2	21.9	27.9	2.9	1.6	25.9	7	13	6.6	19.7	23.5	23.6	2.5	2.5	5.4	28.9	18	18.4	26.4	21.8	26.2	28.9	24.9	31.7	30.9	42.9	39.9	19.4	25.1	26.1	21.2	34.3	23.7
chrV	5647547	5651027	C14C11.4	4.6	1.8	4.1	2.9	2.8	3.6	2.2	3.6	2.7	2.7	3.1	2.8	4.1	4	4.2	0	0	2.6	1.7	2.5	1.4	1.4	0.9	1.1	0	0.1	1.1	1.5	2.9	0.7	1.3	4	4.1	5.3	5.1	1.3	3.7	4.1	5.1	0.5	1.5	5.4	6.8	3.3	2.2
chrV	5644470	5646215	C14C11.5	1.5	1.3	1.1	0.7	0	0	0.1	0.1	0.1	0.1	0.7	0.2	0.3	0.7	0.7	0	0	0.1	0.1	0	0	0.4	0.1	0	0.1	0.1	0.1	0.2	0.5	0.1	0.4	0	0.4	0.5	0.6	0.1	0.4	0	0	0.1	0	0	0.6	0.4	0.2
chrV	5658690	5660690	C14C11.6	5.2	3.8	6.7	2.7	19	18.7	14.5	17.4	18.6	18.4	6.6	7	6.4	2.9	3.1	13.1	11.1	2.9	17.3	14	15.5	9.6	11.2	11.3	14.8	12.9	14.6	11.4	3.3	8.4	6.2	5.5	4.1	5.2	5.7	7.2	2.8	2.7	3.3	5.5	4.9	3.7	4.3	3.6	5.7
chrV	5665222	5666447	C14C11.7	16.4	15.1	13.1	21.7	50.5	49.8	45.2	41.8	42.9	37.9	27.3	22.2	32.9	16.9	28.1	40.2	45.9	14.1	33.1	43.3	38.5	15.9	14.6	14.5	37.5	42.9	36	13.4	37.2	67.3	46.6	26.9	28.8	33.8	34.5	41.4	55.4	40.8	44.7	86.8	49.6	41.3	27.8	48.5	51.4
chrV	5669594	5676071	C14C11.8	54.2	3.3	23.9	83.7	2.2	0.7	3	2.9	0.8	2.8	59.7	54.3	7.8	17.9	7.5	0.8	1.2	94.4	1.4	7.5	1.1	0.5	0.5	0.4	1.1	1.2	0.9	0.9	44.8	36.1	61.7	49.7	45.5	39.2	16.9	146	177.6	174.7	163.1	71.8	86.1	71.7	40.6	114.2	78.8
chrV	560195	562957	C14C6.1	0	0	0.1	0	0.1	0	0	0.1	0	0	0	0	0	0	0	0.3	0	0	0.1	0	0	0	0	0	0.8	1	0	0	0	0.3	0.4	0	0	0	0.1	0.1	0.8	0.8	0.6	0.7	0.1	0	0	0.8	0.4
chrV	564391	566085	C14C6.10	0.3	0	0	0	0	0.1	0	0.1	0	0	0	0	0	0.3	0	0	0	0.1	0	0	0	0	0.1	0.1	0	0	0	0.1	0	0.1	0.2	0.4	0	0.1	0	0.2	0.1	0.3	0.3	0	0.2	0	0.1	0.2	0.2
chrV	570571	571178	C14C6.12	0.4	1.6	2.1	4.1	0.2	0.4	0.4	0.2	0.5	0.5	1.9	3.1	2.5	3.2	2	0	0	6.5	0.1	0.7	0	0.7	0.2	1.4	0	0	0.2	4.7	6.1	0	0	0	1.6	6.1	3.5	0	0	0	0	0	0	1.9	2.2	0	0
chrV	572031	574740	C14C6.13	0	0	0	0	0.2	0	0.1	0	0	0	0	0.2	0	0	0	0	0	0	0	0	0	2.5	3.5	2.3	0	0	0	3.9	0	0	0	0	0	0	0	0	0.1	0	0	0	0	0	0	0	0
chrV	563135	564383	C14C6.2	65.4	29.9	48.6	78.8	89.9	50.3	69.9	22.8	29.5	24.4	57.4	44.1	61.9	81.6	106.3	0.4	0	66	21.3	48.7	29.3	83.3	149.8	169.2	0.6	0.3	27.7	141.9	134.2	0.4	2	76.5	77.9	82.2	130.1	0	0.6	1.3	2.5	0.6	0.8	124.3	126.4	3.4	1.2
chrV	543469	545360	C14C6.3	0.3	0.2	0.4	0.4	0	0	0.1	0	0	0	0.3	0.2	0	0.4	0.4	0	0	0.2	0	0.2	0	0	0	0	0	0	0	0	5.2	0	0.1	2.1	0.9	0.8	0.5	0	0	0.1	0	0	0	1.4	0.1	0	0.3
chrV	539202	541487	C14C6.4	1	0.2	1.7	2.8	0.1	0	0.1	0	0	0.2	0.4	0.9	1.2	2.6	3.5	0	0	1.2	0	0.3	0	0.1	0.4	0.3	0	0	0.1	0.3	9.2	0	0.1	2.1	9.8	6.1	7.8	0	0	0	0	0	0.1	0.2	0.9	0	0.1
chrV	536628	537419	C14C6.5	327.5	178	242.5	173.6	239.3	390.7	272.4	354.7	254.4	384.7	132.8	136.5	183.8	145.9	283.7	0	0	339.4	74.4	240.2	71.4	13.2	75.1	57.3	0.1	0	57.6	35	361.2	5.9	21.7	337	403.3	1229.5	974.4	6.8	25.2	22.5	21.3	3.3	6.7	984	316	31.6	9.9
chrV	545844	548081	C14C6.6	0.1	0	0.2	0.1	0	0	0.2	0	0	0	0	0.1	0.1	0	0	0	0	0.1	0	0.6	0	0	0	0	0	0	0	0	3.5	0	0	0.2	1.2	0.2	0.2	0	0	0	0.1	0	0	0	0	0	0.1
chrV	548702	550654	C14C6.7	0	0	0	0	0.1	0	0	0	0	0	0	0.1	0.1	0	0	0	0	0	0	0	0	0	0	0	0	0	0	0	0.4	0	0	0	0.1	0.2	0.1	0.1	0	0	0	0	0	0	0	0	0.1
chrV	551279	552979	C14C6.8	0	0	0.2	0.1	0.1	0.1	0.1	0	0	0	0.1	0.1	0.1	0.1	0.1	0	0	0	0	0.3	0	0	0	0	0	0	0	0	2.4	0	0.1	0.5	0.3	0.1	0.2	0.1	0.1	0.2	0.2	0	0	0	0.1	0	0.1
chrV	554374	556156	C14C6.9	0	0.1	0	0	0.1	0.1	0.1	0	0.1	0	0	0	0	0.1	0	0	0	0	0	0.1	0	0	0	0	0	0	0	0	0	0	0.7	0	0	0	0	0	0	0	0	0	0	0	0	0	0
chrX	1826459	1827348	C14E2.1	0	0	0	0	0	0	0	0	0.3	0	0	0	0	0	0	0	0	0.2	0	0	0	0	0	0	0.3	0.3	0	0	0	0.5	0.6	0	0	0	0	0	0	0.6	0	0.2	0.2	0.6	0	1.1	0.7
chrX	1806748	1809537	C14E2.2	0	0	0	0	0	0	0.1	0	0	0.1	0.1	0	0	0	0	0	0	0	0	0.1	0	0	0	0	0.1	0.1	0.1	0	0	0.1	0.1	1.2	0	0.1	0	0	0	0	0	0.2	0.1	0	0	0	0
chrX	1810679	1811530	C14E2.3	0	0	0	0	0	0	0	0	0.1	0	0	0	0	0	0.1	0	0	0	0	0	0	0.4	0.5	0	0	0	0	0.7	0	0	1.4	0	0	0	0	0.4	0	0	0	0.4	0	0.3	0	0	0.6
chrX	1818858	1821318	C14E2.4	0.2	0	0	0	0	0	0	0	0	0	0	0.1	0	0	0	0	0	0	0.1	0	0.2	7	5.2	4.1	0.1	0	0.2	8.1	0	0.1	0.2	0	0	0	0	0	0	0.2	0	0	0	0	0.1	0.1	0.1
chrX	1823609	1825334	C14E2.5	0	0	0	0	0	0	0	0.1	0	0	0.1	0	0	0	0.1	0	0	0	0	0	0	0	0.1	0	0	0	0	0.1	0	0.1	0.2	0	0	0	0	0.1	0.2	0.2	0.4	0.1	0.2	0	0	0.4	0.3
chrX	1827731	1828481	C14E2.6	0.3	0	0	0	0	0.1	0.3	0	0	0	0	0.2	0.2	0.1	0.1	0	0	0.5	0	0.2	0.1	0.6	0.1	0.5	0	0	0	1	0.3	0	0	0	0.3	0	0	0	0.3	0.2	0	0	0.1	0.3	0.4	0.1	0
chrX	1816354	1816756	C14E2.7	0.6	0	0	0.4	0	0.7	0	0	0.3	0	1.7	0.4	1.2	0.6	0.9	0	0	1	0	0	0.2	0	0.3	0.2	0	0.3	0	0.5	1.2	0.7	5	0	2.5	0.4	2.2	2.2	6.6	2.4	1.2	1.2	1.9	0	0	3.4	2.3
chrX	6240918	6242690	C14F11.1	165.6	152.8	153.6	284.8	206.1	174.1	183	165.1	146.9	167	237.2	230.8	236.5	312.6	270.3	215.3	156.7	219.4	163.1	170	156.2	349	397.2	342	214.8	176.2	143.6	399.2	455.2	116.3	115	371.1	384	285.2	333.8	89.6	53.5	38.5	65.3	97.8	89.7	189.5	199	52.7	69.5
chrX	6208730	6213876	C14F11.2	14.1	11	14.2	17.5	4.7	2.6	4.7	4.4	3.1	4.2	15.2	16.3	14.1	20	20.6	18.4	17.5	13.6	2.7	6.2	4	9.5	6	5.1	16.9	15.8	2.7	11.2	14.2	47.5	54.5	16.7	15.2	16.1	17.3	57.8	63	83.5	76.6	60.6	64.7	25.9	18.2	70.6	57.9
chrX	6226095	6230665	C14F11.3	5.2	15.2	6.6	6.9	2.2	1.2	2.8	1.4	1.4	1.3	3.8	3.5	4.6	12.8	7	0.2	0.2	3.8	1.2	2.5	1.3	4	3.5	2.5	0	0	2.2	7.5	7.7	0.3	2.2	5.3	5.6	5.3	8.1	0.2	0.3	0.9	1.4	0.3	0.3	10.8	7	1.3	0.8
chrX	6230882	6233012	C14F11.4	0.1	0.2	0.3	0.1	88.5	47.4	81.4	54	53.6	57.8	0.2	0	0.2	0.3	0.2	0	0	0.1	38.3	86.3	46.1	0.3	2.4	0.8	0	0.1	44.3	0.8	0.5	0.2	0.6	0.3	0.4	1	1.1	0.2	0.1	0.2	0.6	0.1	0.1	0.6	0.6	0.3	0.5
chrX	6233112	6235505	C14F11.5	29.4	71.2	56.6	21.8	60.5	51.9	61.3	47.5	52.9	45.3	22.1	20	31.8	74.2	56	0.2	0	22.6	41.3	57.4	47	43.5	104.6	97.6	0	0.1	44.6	87.6	43.3	4.9	22	46.1	46	55.2	85.9	11.3	13.4	17.1	14.9	6.9	11.2	39.3	65.6	22.3	16.1
chrX	6237984	6239051	C14F11.6	65.3	43.7	46.4	211.9	3.4	0.4	6.2	5.5	1.4	5.9	163.3	165.1	50.7	65.7	77.6	4.1	3.1	126.6	1.7	6.9	1.5	0.6	0.5	1	3.8	3.8	0.3	0.6	123.8	106.7	188.8	126.3	130.5	142	97.8	266.7	297.7	263.7	238.3	156.2	152.5	135.2	36.4	252.9	171.5
chrX	6208125	6208528	C14F11.7	0.8	2.5	2.8	0	0.3	0	0.4	1.8	0.3	0.7	0	1.1	0	0.3	1	2.7	0	0.6	0.3	1.8	1.3	695.6	695.4	804	0.7	1.3	0	1052.1	0.8	6.1	12.6	0	1.3	2.3	1	4.5	3.3	4.8	4.8	3.7	6.7	1.6	0.4	5	6
chrX	7954306	7956143	C14F5.1	33.4	102.7	38	62.6	16.5	13.6	25.3	21.1	16.5	23.7	42.1	45.6	38.1	72.6	32.3	76.4	88.3	20.7	15.9	19.3	22.9	49.3	41.5	26.4	81.7	84.2	19.2	35.7	74.3	188.5	225.3	67.7	38.1	36.2	46	173.6	199.3	176.8	198.3	209.8	187.2	40	24	296.1	239.5
chrX	7930689	7931760	C14F5.2	2	2.1	1	4.6	0.3	0.2	2.3	0.3	0.3	0.6	2.4	2.4	1	3.1	2.7	0.5	0	2.4	0.8	0.7	0.9	0.8	2.1	1.1	0	0	1.3	1.3	6.3	2	11.5	3.8	3.5	2.2	1.7	2.8	2.2	4.7	1.4	9.1	1.3	3.1	2.4	10.6	9.2
chrX	7937518	7945000	C14F5.3	112.9	47.4	132.8	90.5	25.6	15.7	39.8	23.8	29.8	21.9	81.1	75.5	85.2	85.8	91	0.9	0.2	83.9	33.7	51.6	41.3	57	55.5	44	0.7	0.3	43.3	56.8	83.7	72	113.7	74.3	66	64.5	65.6	150.3	153.8	188.8	160.2	95.8	141.4	104.7	125.7	168	121.9
chrX	7956146	7958261	C14F5.4	8.1	5.8	9.2	11.5	4.1	4.5	5.6	4.5	4.4	4.4	16.4	13.7	10.3	8.7	10.5	10.3	11.8	13.4	5.2	4.2	4.7	2.2	4.5	4.4	9.4	11	4.2	4	14.2	15.9	14.1	17.5	14.3	15.4	13.8	22.6	21.5	23.1	21.1	11.7	17.2	11	13.5	16.7	16.3
chrX	7959778	7961677	C14F5.5	18.8	13.1	26.8	15.6	20.5	17.7	18	16.4	18.3	17.9	16.8	14.1	16.3	15.5	14.1	69.8	59.5	7.2	13.4	14.5	15.2	8.3	8.3	5.4	74.5	68.4	15.6	10.4	20.4	66	46.4	20.9	14.9	11.9	14.7	40.4	42.1	41.8	43.9	55.4	40.9	23.4	21.7	42.2	51.9
chrX	10233684	10236886	C14H10.1	114.9	50.4	124.5	70.2	61.6	35.9	52.7	33.5	31.7	31.2	72.4	73.2	65.2	63	46.7	2.3	1.8	46.7	32.3	45.4	30.9	37.2	51	44.2	2	1.6	33.3	59.9	80.4	22.6	43.2	62.5	57.3	61	61.3	37.2	58.4	53.4	65.7	36.4	27.3	71.7	58.5	46.1	28.7
chrX	10242266	10251295	C14H10.2	67.4	21.8	53.6	48.3	7	4.4	6.5	5.5	4.9	6.2	32.6	32	18.1	28.3	25.9	16.9	15.9	30.8	4	7.6	5.2	2.6	4.7	3.1	17.3	17.4	4.5	6.4	30.5	55.2	70.2	33.5	29.9	29.2	23.7	93.3	100.5	138.9	116.5	90.5	92.3	50.1	30.4	88.9	73.2
chrX	10220579	10228076	C14H10.3	34.7	17.6	29.3	42.2	8.6	6.1	8.6	9	7.2	9.7	40.9	40.3	23.7	26.5	26.1	3.1	1.7	29.2	6.5	9.5	6	16.1	15.4	12.9	2.5	2.5	5.6	21.5	32.5	8.8	16.3	32.2	33.4	30.9	23.5	26.5	25.2	35.4	33.2	10.9	19.9	32.1	16.7	21.1	14.9
chrX	10239302	10240979	C14H10.4	0.1	0.1	0	0	0	0	0	0.1	0	0	0	0	0	0	0	0	0	0	0	0	0	0	0	0.1	0	0	0	0	0	0.1	0	0	0	0	0	0	0	0	0	0	0	0	0	0	0
chrI	7385867	7387106	C15A11.1	0	0	0	0	0	0	2.6	0	0	0	0	0	0	0	0	0	0	0	0	0.9	0	0.1	0	0	0	0	0	0	0	0	0.1	0.6	0	0	0	0.1	0	0	0	0	0	0	0	0	0.1
chrI	7384394	7388792	C15A11.2	0.2	0.8	1.6	1.2	7.2	1.3	8	3.7	1.6	2.8	1.2	0.9	0.6	1.4	0.5	0	0	0.5	5	10.8	4	104.9	99.4	119.5	0.3	0.7	3.5	82.5	2.2	0	3.3	0	0.2	0.7	0.7	0.3	0.8	1.4	1	0.2	0.9	1	0.6	3.5	2.4
chrI	7389042	7395915	C15A11.3	4.1	2.5	4.9	3.2	0.5	0.2	0.5	0.4	0.2	0.8	2.9	2.8	2.7	5	3.1	0	0	2.2	0.2	0.7	0.2	1.4	0.9	0.9	0.1	0.1	0.2	1.7	3.7	1.8	5.6	4	2.8	3	3.2	4.8	5.6	8.4	11.3	1.3	3.6	4.8	5.1	6.7	4.6
chrI	7398820	7401020	C15A11.4	1	0.4	0.9	1.3	0.5	0.7	0.5	1.2	0.6	1.5	0.3	0.2	0.1	0.4	0	0	0.4	0.4	0.3	0.7	0.5	0	0.3	0.1	0.1	0	0.2	0.3	0.3	0.8	3.5	0.7	0.5	0.1	0.2	2.4	4.7	7.2	4.6	1.2	0.8	1	0.5	2.9	2.7
chrI	7401671	7402753	C15A11.5	0.2	3.7	0.3	0.3	62.3	13.4	78.2	36.1	52.6	49	0.2	0.2	0.6	1	0.4	0.1	0	0.4	27.2	123.6	25.1	12.3	11.5	2.7	0.1	0.1	24.1	4	0.4	0.1	0.1	0.5	0.1	0.3	0.1	0.1	0.2	0	0.1	0	0	0.4	0.2	0.1	0.4
chrI	7403337	7404349	C15A11.6	0.7	5.6	0.8	0.8	82.5	19.8	105.9	49.1	70	65	0.4	0.6	1	1.5	0.6	0.1	0	1	43.1	183.3	40.3	28.3	19	5.4	0.1	0	37.1	6	0.8	0.1	0.2	0.2	0.1	0.5	0.1	0.2	0.3	0.1	0.1	0	0	0.3	0.4	0.1	0.4
chrI	7405026	7408508	C15A11.7	2.6	23.7	6.5	7.6	2.9	2.8	5.9	5.6	4	6.4	8.8	7.9	11	13.7	5.6	0	0	1.7	2.5	3.1	3.1	34.2	15.1	19.9	0	0	2	41.7	13.6	0.2	0.2	21.3	6.7	8.2	11.6	0.2	0.1	0.8	0.9	0.1	0.2	5.4	6.8	0.7	0.5
chrX	12065195	12067364	C15A7.1	0.6	0.1	0.5	0.2	0	0.2	0.1	0.1	0	0.1	0.2	0.9	0.6	0.6	0.9	0	0	0.3	0	0.1	0.1	0.3	0.2	0.3	0	0	0.1	0.4	0.8	0.5	0.8	0.3	0.6	1	1.1	0.9	1.4	2.6	2	0.7	1.2	0	1	1.1	0.8
chrX	12070674	12073795	C15A7.2	0.3	0.4	0.9	0.5	0.1	0	0.1	0.1	0.1	0.2	0.4	0.8	0.2	0.6	0.4	0	0	0.3	0	0.1	0.1	0.3	0.2	0.1	0	0	0	0.7	1	0.6	1.4	0.2	0.3	0.4	0.4	2.2	2	2.4	2.8	0.8	1.5	0.7	0.6	2.2	1.2
chrX	12068481	12070495	C15A7.4	0	0.1	0.1	0.2	0.1	0.1	0.1	0.1	0.1	0.1	0.3	0.7	0.1	0.2	0.1	0	0	0	0.2	0	0.1	0.2	0.3	0.2	0	0	0.2	0.4	0.2	0	0.1	0	0.2	0.1	0.1	0.2	0	0.6	0.1	0.2	0.3	0	0.2	0.1	0.2
chrX	6476775	6479048	C15B12.1	10.4	9.1	11	7	5.5	4.1	6	3.7	2.7	4	11.2	11.3	8.8	7.9	6.9	2.9	4.4	4.9	2.8	4.7	3	28.2	10.3	10.1	2.8	3.2	2.7	25.4	5.8	4	2.9	8.4	5.7	4.9	7.3	4.6	2.9	4.2	4	2.2	5.9	6.7	9.2	4.4	3.5
chrX	6461946	6465396	C15B12.2	1	1.6	1.4	0.8	0	0.1	0.1	0.1	0.4	0.1	0.1	0.1	0.2	0.9	0.5	0	0	0.5	0.1	0.1	0.1	0	0	0.1	0	0	0.1	0	0	0.1	0.2	1.2	0.3	0.6	0.2	0.1	0.3	0.3	0.7	0.1	0.2	2.8	1.4	0.4	0.5
chrX	6467246	6467525	C15B12.3	0	0	0	0	0	0	0	0	0.6	0	0	0	0	0	0	0	0	0	0	0	0	0	0	0	0	0	0	0	0	0.6	0.7	0	0	0	0	0	0	0	0	0	0.4	0	0	0	0
chrX	6470328	6473711	C15B12.4	3.7	5.1	4.5	4.7	1.4	0.6	1.1	0.8	0.9	1	2.9	2.9	2.6	6.8	5.2	0.2	0.3	3.9	0.8	1.2	0.8	2.7	3.2	3.1	0.1	0.1	0.6	4.9	4.2	0.2	0.7	2.5	4	4.3	5	0.2	0.2	0.1	0.2	0.3	0.2	3.4	3.7	0.7	0.2
chrX	6479600	6484773	C15B12.5	1.9	1.5	1.7	2.1	0.7	0.6	0.7	0.6	0.3	0.6	1	1.5	1.8	2.2	2.1	0	0	1.4	0.5	1	0.5	0.7	0.7	0.7	0	0	0.5	1.1	1.7	0.3	1.1	1.9	1	1.4	1.4	0.7	1.6	2	2.8	0.3	1	1.5	1.7	1.6	1
chrX	6497882	6499799	C15B12.6	7.9	4.5	8.6	4	3.6	2.2	2.5	1.9	2.3	2.7	4.2	3.4	4.1	3.6	4.2	10.4	7.5	2.3	1.9	2	1.7	1.1	2	1.4	7.1	5.6	2.2	2.9	2.3	8.3	6.5	5.3	3.7	4.7	3.5	12.3	12.6	15.6	13.9	10.4	9.3	6.3	4.7	6.4	6.9
chrX	6499871	6504576	C15B12.7	32.7	26.5	35.6	11.1	10	9	8.8	10.1	9.1	10.3	12	11.8	11.7	14.5	12	21.6	15.7	9.9	7.1	7.4	8.7	7.8	14.4	10.9	20.9	18.9	8.2	18.5	13.4	21.4	20.8	13.5	11.5	14.5	15.8	25.9	23.5	23.4	26.6	22.8	18.5	15.7	13.8	22.4	21
chrX	6474236	6476743	C15B12.8	0.6	0.7	0.6	0.2	0.2	0.2	0.2	0.1	0.1	0.1	0.5	0.1	0.4	0.7	0.4	0.7	0.4	0.4	0.2	0.1	0	1.3	0.2	1.2	0.5	0.8	0	0.5	0.2	0.8	1.3	0	0.1	0.6	0.4	0.8	1.1	0.6	1	1.4	0.8	1	1.3	1.2	1.3
chrX	6468761	6469766	C15B12.9	0.6	0	0.2	0	0	0	0	0.1	0.1	0	0.1	0.1	0	0.1	0	0	0	0	0	0	0	0	0.1	0	0	0	0	0.1	0	0.6	1.1	0.5	0	0	0.1	0.8	0.7	1.8	2	0.7	1.4	0	0	1.6	1
chrI	12202220	12203708	C15C6.1	120	33.8	57.5	80	7.9	2.7	8.9	7.1	3.6	6.8	59.1	60.8	11.8	23.2	13.4	2.2	0.8	45.6	2.8	8.5	2.6	0.2	1.2	0.4	1.4	1.3	2.8	0.8	48.6	33.6	52	58.2	54.8	56	33	72.5	158.5	148.3	173.4	25.2	62.9	126.8	39.8	90.8	66.9
chrI	12203790	12205800	C15C6.2	0.3	0	0	0.1	70.1	24.9	85.9	44.4	35.3	42.6	0.2	0.1	0	0.1	0.2	0.5	0.3	0.1	41.2	90.2	51.5	488.4	469.2	609.7	0.4	0.6	40.4	571.5	0.4	0.3	1.2	0	0.1	0.2	0.1	0.5	0.8	0.1	0.5	0.3	0.4	0.4	0.3	0.4	0.9
chrI	12207085	12212197	C15C6.3	24.9	19.8	20.9	27	28.7	38.1	31.4	38.9	34.5	38	22.7	23.7	21.6	21.1	21.4	95.7	86.2	22.7	33.2	27	31.6	25.3	21.4	21.1	93.7	88.5	31.4	26.5	21.6	78.7	57.9	21.8	20.7	20.4	21.1	82.7	74.2	59.8	64.2	77.6	66.6	28.4	22.4	57.7	75.5
chrI	12213099	12215175	C15C6.4	7.1	5.1	7.7	6.8	26.7	27	24	29	25.4	31.6	8.2	7.8	8	7.4	5.5	55.1	53.8	4.6	25.2	20.1	27	12.4	12.6	10.8	58.1	58.3	21.9	9.9	7.6	31.3	27.6	6.4	5.2	8.8	5.8	34.4	31.3	19.2	19.6	17.3	25.6	10.4	12.1	21.2	26.1
chrX	3164512	3165646	C15C7.1	10.8	7	12	9	10.2	10.7	5.4	7.7	8	10.8	9.7	11.1	8	6.2	5.4	44.1	38.5	7.8	9.4	10.2	9.8	3.4	10.3	8.8	38	34.4	10.7	12.3	8.5	30.9	19.8	1.9	5.1	5.4	7	32.8	38.4	32.3	27.4	28.9	32.1	10.6	9.6	24.2	29.2
chrX	3159927	3164419	C15C7.2	12.7	6.9	13.5	10.9	5.9	4.4	5	6	4.9	6.4	7.8	8	4	5.1	6.3	9.4	11.1	8.4	4.3	6	5.3	4.9	5.6	5.1	10	11.3	4.2	5.6	6.9	14.8	13.6	7.8	6.8	7.3	6.8	14.6	13.2	19.3	19.8	16.1	15.4	6.8	6.7	12.6	12.1
chrX	3146562	3147078	C15C7.4	19	13.7	16.3	43.1	6.2	3.7	7.9	3.5	3.9	4.4	29.9	29.1	24.2	84.1	50.6	0.8	1	31	6.1	7.2	5	18.7	18.4	18.7	0.2	0.4	6.2	19.7	34.9	3.1	9	53.1	34.9	32	46.9	3.6	6.4	9.4	10.2	7	5.5	64.7	63.1	30.7	12.8
chrX	3151134	3152453	C15C7.5	332.6	112.9	339.3	415.8	89.2	73.9	107.8	91.7	62.5	89.3	291.6	290	189.9	195	264.5	70.6	55.4	379.2	89.3	175.2	103.9	108.2	126	101.6	76	66.7	93.2	72.3	307.2	141.6	228.3	264.7	258.4	304.4	272.7	322.4	368.8	261.3	285.4	202.1	239.1	339.1	259.5	355.9	250.3
chrX	3167559	3170498	C15C7.6	0.3	0.2	0.2	0.2	1.2	0.3	0.7	0.3	0.4	0.7	1.5	1.1	0.3	0.1	0.2	0	0	0.2	0.4	0.7	0.4	0.3	0.2	0.2	0	0.1	0.4	0.2	0.1	0.1	0.7	0.3	0.3	0.2	0.2	0.6	0.6	0.9	0.7	0.2	0.2	0	0.1	1	0.7
chrX	3165785	3167589	C15C7.7	32.5	15.2	32.1	13.7	8.8	5.6	7.1	6.6	6.3	6.1	17.3	14.1	12.9	12.3	14.6	7.5	3.7	14.5	4.3	7.3	3.8	3.6	4.1	4.7	6.3	4.9	3	6.6	11.8	12.1	11.2	13.9	16.6	18.8	17.8	18	16.4	21.2	18.8	8.3	15.1	15.2	12.7	17	10.8
chrV	12734165	12736024	C15C8.1	13.7	16.9	12.3	17.7	2.3	1.7	2.7	2.5	1.7	2.7	11.4	10.2	8.5	26.5	16.5	0.5	0	8.6	2.2	2.7	2.4	7.6	6.4	6.7	0	0	1.7	12.7	15.1	1.2	2.7	13.7	10.5	11.2	13.7	1.2	3.4	4.7	3.9	1.1	2.7	19.1	20.6	3.4	2.1
chrV	12736685	12741194	C15C8.2	1.6	0.1	1	4.1	0	0	0.2	0.1	0	0.1	5.3	4.8	3.4	4.4	3.7	0	0.2	3.2	0	0.2	0	0	0	0.1	0	0.1	0	0.1	6.6	4.7	5.1	3.6	4.1	3.4	3.1	15.3	15.6	19.3	17.7	13	9.2	6.4	2.1	9.5	7.7
chrV	12742021	12744153	C15C8.3	31.6	46.1	77.6	196.3	113.6	59.2	75.8	21.9	20.7	33	163.9	173.2	166	96.7	168.3	0.2	0	190.1	16.3	11.8	51.3	22.3	46.2	62.2	0	0.2	39.4	89.2	106.3	1	1.7	111.4	94.8	86.1	98.2	2.4	4.7	12.4	6.7	2.5	0.5	50.1	55.9	1.8	2
chrV	12745182	12747447	C15C8.4	25.4	10.6	35.2	15.9	31.7	26.7	26	32	25.4	32.9	14.5	14.5	12.8	16	18.2	32.2	34.1	9.2	22.7	15.6	25.5	9.7	10.4	10.2	33.3	32.9	21	12.9	16.6	36.3	38	12.8	13.5	15.7	15.9	30	24.3	32.3	35.4	44.1	29.8	17.6	14.8	29	25.7
chrV	12748274	12749946	C15C8.5	3.6	3.1	4	1.9	0.4	0.2	0.3	0.2	0.5	0.2	1.1	0.8	1.1	2.5	1.6	1.7	5.4	0.9	0	0.2	0.1	0.5	0.3	0.4	2.3	3.2	0	0.3	0.7	2.1	2	1.8	1.2	0.9	1.6	2.6	1.2	3.1	3.9	1.7	2.3	2.9	2.2	2.9	1.7
chrV	12750012	12751528	C15C8.6	1.7	2.1	3.5	0.9	0.5	0.3	0.1	0.3	0.2	0.1	0.5	0.2	0.6	1.4	1.1	0.3	0	0.3	0.2	0.3	0.1	0.8	0.9	0.5	0	0	0.5	1.3	0.6	0.1	0.1	1.5	0.8	0.8	0.5	0.1	0.5	0.5	0.6	0.1	0.1	1.1	0.3	0.3	0.4
chrV	12744142	12745033	C15C8.7	31	31.8	64.3	29.9	49.8	37.1	44.4	51.9	40.5	47.2	57.1	42.2	49.8	32.2	24.6	116.2	139.7	17.5	38.8	38.2	40	25.9	22.2	23.2	102.6	122	33.7	31.5	51.4	95.2	65.2	39.8	34.6	31.5	35.1	68.1	83.8	59.3	52.8	89	79	61.9	53.4	53.7	92.3
chrV	12751585	12752490	C15C8.8	2.5	0.6	5.6	0.4	0.1	0	0.3	0	0.1	0.1	0.4	1.2	0.4	0.9	0.3	0	0	0.2	0	0.2	0	0	0.1	0	0.4	0.5	0	0	0.3	2.9	4	0	0.7	0.3	0.9	9.3	29.1	31.4	25.2	5.6	4.3	3.1	0.7	12	7.8
chrII	6988735	6991644	C15F1.1	48.1	17.8	53.5	17.4	16.6	7.7	15.8	11.4	12.9	9.8	14.9	15.2	13.7	19.3	10.8	0.2	0.3	15.4	8.3	18.9	7.9	5.9	10.4	8.8	0.1	0.1	6.6	10.6	12.3	2.6	4.2	17.2	16.2	17.8	15.4	3.9	11	14.3	20.3	1	5.6	41.3	19.5	6.8	6.6
chrII	6979908	6988587	C15F1.2	8.6	4	14.1	21.8	0.5	0.2	0.7	0.9	0.3	0.7	25.1	26.3	19.7	17.2	22.1	1.6	1.3	6.7	0.3	1	0.5	0.2	0.4	0.3	1.5	1.4	0.3	0.4	20.1	0.4	0.8	20.1	17.9	18.8	17	0.6	0.5	0.8	0.7	0.4	0.4	18.2	6.4	0.9	0.5
chrII	6955363	6965645	C15F1.3	16.8	9	20.5	12	27.8	32.5	25.1	30.3	32.2	28.6	15.5	16	14.1	16.1	16.4	78.6	72	10.9	27.5	21.3	27.9	8.4	13.3	8.3	81	80.2	26.6	15.9	12.2	57.2	29.6	16.8	12.8	12.9	14.9	31	25.1	32	30.1	46.2	45.1	18.1	18.6	27.1	33.7
chrII	6965757	6967606	C15F1.4	17	7.4	18	10.2	23	22.4	22.1	26.6	22.9	23.5	17.2	16.6	12.5	11.9	12.3	35.1	31.9	7.3	15.7	13	16	13.4	12.8	13	30.4	31	12.4	16.2	9.5	26.6	23.2	13.1	12.3	13.6	16.5	17.4	14.5	18.9	16.8	19.8	16.3	9.5	12.5	17.9	18.5
chrII	6967861	6970543	C15F1.5	0	0.1	0.3	0.4	3.9	1.8	4.2	3.5	2.4	3	1	0.6	0.2	0.3	0.3	4.3	2.7	0.2	2.2	5	3.2	37.2	35.9	38.8	3.4	3.1	2.3	37	0	1.9	2.3	0	0.8	0.5	0.5	1.9	1.4	0.8	0.9	1	1.8	0	0.2	1.4	1.5
chrII	6970625	6972195	C15F1.6	264.7	150.6	264.9	305.5	399.5	360.7	326.3	310.9	347.8	274.9	349.6	333.7	317.1	336	410.2	356.6	333.5	307.1	289.6	308.9	333.2	145.1	220.6	175.7	361.6	347.9	313.7	326.7	331.5	249.5	161.4	269.6	280.1	301	336.7	198.6	175	187.3	166.6	291.4	202.7	272.4	279	146.1	179.2
chrII	6972669	6973850	C15F1.7	212.3	222.7	258.3	346.2	304.8	324.7	290.6	280.2	272.1	282.3	333.9	315.9	312.1	343.3	378.7	400.5	447.9	245.7	296	287.2	325.4	284.8	311.6	335.8	426.4	420	335.2	236.5	382.7	289.1	245.1	279	324.3	322	359.7	222.3	225	199.6	189.4	228.3	224.8	355.3	345.1	226	254.3
chrII	6976767	6977325	C15F1.8	1.4	0.9	0.6	1.6	3.7	6	5.4	8.6	4.5	6.1	2	1.7	0.8	1.3	0.5	3.7	4.8	1.2	2.5	4.2	5.3	4.1	6	3.5	2.4	2.3	4.1	5.8	1	4.7	3.4	1	1	0.9	0.9	3.7	3	2.6	3.5	4.9	2.4	1.6	0.4	2.2	2.3
chrV	14393842	14394449	C15H11.1	0	0	0	0	35.6	10.7	48.2	23.4	14.4	15.1	0	0.9	0	0.2	0	1.1	0	0	14.6	41.4	16.4	206	228	250.9	0.3	0.3	11.3	245.5	0	0	0	0	0	0.4	0	0	0	0	0	0	0	0.6	0	0.2	0.4
chrV	14392224	14393546	C15H11.10	0	0	0	0	0.1	0.1	0.3	0	0.1	0.3	0.5	0	0	0	0.1	0	0	0	0	0.1	0	5.9	5	3.2	0	0	0.2	5.3	0	0	0.2	0	0.3	0.2	0	0	0	0	0	0	0	0	0	0	0
chrV	14415798	14416131	C15H11.11	11	9.5	10.4	7.6	4.6	6	7.1	5.2	2.9	4.5	14	6.8	7.8	9.2	6.4	6.8	0	4.2	2.1	3.2	5.9	11.1	5.7	9.8	1.1	1.7	3.3	10.7	6.6	6.5	8.4	10.4	13.3	14.1	18.7	5.1	13.1	15.1	6.9	2.7	5.7	2.7	12	14	8.8
chrV	14395020	14395734	C15H11.13	0	0	0	0	0.7	0.6	3.1	0.2	0.5	1.8	0	0	0	0	0	0	0	0	0.3	1.9	0.9	31.5	20.6	28	0	0	1.4	26.4	0	0	0	1.9	0	0	0	0	0	0	0	0	0.3	0	0	0	0
chrV	14409062	14411880	C15H11.2	1.4	3.8	2.3	2	0.6	0.2	0.6	0.3	0.2	0.4	1.3	1.4	0.7	1.8	1.3	0.7	0	0.5	0	0.3	0.3	0.2	0.5	0.6	0.2	0.7	0.5	0.8	1.8	0.2	1.1	2.4	1.8	1.7	1.3	0.7	0.6	1	1.6	0.4	0.6	3.1	1.8	1.3	1.3
chrV	14412389	14415777	C15H11.3	69.2	56.1	66.2	43.8	49.3	48.7	50.1	56.6	47.8	58.8	45.9	44.3	40.7	57.8	37.9	117.4	113.5	32.7	40.2	32.1	38.7	23.7	32.8	28.4	112.8	115.5	32.7	36.9	72.4	99.7	87.2	72	50.6	44.1	51.9	69.3	72.5	82.1	72.2	110.1	74.1	47.6	44.3	85.6	84.4
chrV	14420036	14422605	C15H11.4	59.1	52.7	78.6	51.2	75.4	70.9	66.5	78.4	76.8	83.2	53.4	48.1	49.5	38	39.3	100.6	86.3	34.4	65.8	58.2	64.8	67.8	62.4	70.6	94.8	90.2	53.7	52.3	55.9	87.6	75.8	47	53	53.2	57.5	64.3	61.3	53	59.3	63.2	58.2	57.9	44.8	52.4	53.5
chrV	14417939	14420066	C15H11.5	7.1	2.2	9.1	5.1	16	19.3	13.9	16	18.5	18.2	12.7	10.2	11.4	5.2	5.5	19.6	17.4	6.1	15.4	13.3	15.7	12.1	9.7	9.7	21	18.7	13.7	13.1	3.8	13.9	10.1	4.2	5.4	7	5.6	10.2	6.2	6.7	6.8	10.1	11	3	7.3	5.5	8
chrV	14416099	14417814	C15H11.6	4.5	2	5.2	3	24.7	25.5	23.3	25.5	25.5	27.5	8.4	8.3	6.9	2.5	2.9	28.9	25.7	2.6	20.8	17.5	21.2	8.4	8	7.3	25.6	24.6	18.1	8.9	3.9	15.2	15.3	5.2	3.5	3.8	4.1	12.4	7.5	7.2	8.8	12.8	13.9	1.3	4.2	6.8	10.8
chrV	14421439	14422605	C15H11.7	105.4	57.7	117	155.7	177	200	188.4	214.3	205.8	246.9	144.3	160.6	121	105.4	116.1	146.5	129.3	119.1	183.6	171.3	186	146.1	134.8	146	148.2	144.3	186.3	136.8	146	100.9	71.8	148.7	165.2	182.7	145.1	80.5	57.6	47.5	64.5	79.1	71.8	149.4	121.3	54.9	49
chrV	14422704	14423346	C15H11.8	19.2	12.5	16.9	22.2	29.9	34.1	26.7	42.5	35.7	44.2	34.1	38.5	23.1	18.4	14.2	53.8	44.4	22	29.1	25.9	30.1	7.9	9.6	9.2	49	49.6	23.8	15.1	23.6	42.8	38.4	19.7	36.4	26.8	19.5	40.6	45.7	46	25.2	24.5	39.2	17.6	31.3	25.5	29.2
chrV	14423760	14424995	C15H11.9	168.8	91.6	238.6	94.6	120.3	102.1	118	119.4	119.5	106.9	97	92.6	105.5	129.7	112.4	175.5	191.6	99.9	124	126.9	119.9	90.2	75.5	73.4	175.3	186.9	110.2	73.1	81.8	160.4	173.4	91.6	93.3	106	107.2	161.9	140.6	121	115	231.9	169.7	99.2	167.8	174.5	164.1
chrIII	9650336	9651875	C15H7.3	0	0.1	0	0	4.4	1.1	5.2	1.9	1.5	2.2	0	0.1	0	0	0	0.6	1.2	0	2.6	6.4	3.4	85.7	79.7	87	0.6	0.3	1.8	68.1	0	0	0	0	0	0.1	0	0.1	0	0.1	0	0	0	0	0	0	0
chrIII	9654267	9655775	C15H7.4	0.4	0.4	0.1	0	2.2	0.2	2.1	0.5	0.5	0.8	0	0	0.1	0.3	0	0.2	0	0	0.4	1.8	0.7	25.2	21.3	24.2	0.5	0.2	1	19.9	0	0.1	0.1	0	0	0	0.2	0.3	0.1	0.1	0.1	0.1	0.1	0	0	0.3	0
chrX	6122279	6127506	C15H9.1	6	24.6	4.8	12.2	2.5	0.5	2.5	0.8	0.8	0.9	2.9	3.7	2.5	11	2.8	2.7	3.3	3.2	0.6	2.7	0.6	12.2	5.8	6.1	3.2	3.4	0.4	2.6	12.2	5.2	8.4	10.9	6.4	5	5.8	9.9	8.8	9.6	7.1	9.1	5.5	5	2.1	9.6	9.2
chrX	6102845	6103397	C15H9.11	60.9	87.5	76.4	49.4	59.6	36.1	51.9	40.7	41.5	42.5	63.9	49.9	121.3	125.2	102.8	0	0	47.5	27.8	47.8	20.1	43.9	39.6	35.6	0.3	0	14.1	62.6	175.7	22.3	65.1	185.9	153.5	182.4	312.2	39.7	104.5	65.3	59.1	23.3	37.9	101.2	171	60.9	43.5
chrX	6118675	6120401	C15H9.2	0.9	0.8	1.2	1.3	0.4	0.1	0.5	0.3	0.1	0.1	0.9	1.4	0.6	0.6	0.5	0.6	0	1.1	0.1	0.1	0.1	0.5	0	0.1	0.2	0.4	0.3	0.2	1.1	0.9	2.7	1.8	1.2	1.2	0.1	0.9	3.3	2.7	3.3	0.4	1.6	1.8	1.8	3.3	2.1
chrX	6115768	6118016	C15H9.3	1.1	0.9	0.6	0.7	0.1	0	0.1	0	0.1	0.1	0.6	0.2	0.6	1.2	0.7	0.3	0	0.6	0.1	0.2	0.1	0.1	0	0.2	0.1	0.1	0.1	0.2	0.3	0.2	0.3	0.8	1.5	0.6	1.1	0.2	0.7	0.9	0.2	0.4	0.5	0.6	0.5	0.5	0.2
chrX	6101179	6105427	C15H9.4	27.6	27	24	20.8	21.6	19.9	27.4	28.2	20.8	27.2	17.5	18	19.6	26.2	21.6	42	40	21	19.3	19.8	22.6	39.9	33.4	28.2	38.8	38.5	23.7	42	23.4	47	44.4	31.6	23.5	22	23.7	50.5	45.5	52.1	49.1	44	48.5	19.6	18.8	41.4	40.8
chrX	6093250	6097536	C15H9.5	11.9	11.3	14.4	11.1	6.5	5.8	6	6	4.9	7.3	13.1	12.9	12.7	11	10.2	14	14.9	6.3	5.6	6.1	5.7	7.4	7.3	5.5	15.2	15.9	4.7	10.5	13.6	18.1	19.7	14.1	11	9.5	11.4	18.5	15.8	20.5	21	21.1	18.9	13.6	9.4	19.2	16.4
chrX	6088979	6092089	C15H9.6	594.2	289.5	701.4	808.2	348.7	371.1	358.7	365.8	347	346.9	857.1	876.6	975.5	741.9	1062.1	1033	1180.5	803.8	370.4	477.7	373.4	596.4	768.8	549.1	1040.4	1158.2	342.8	790.5	1096.7	1509	1107.2	820.2	883.8	955.4	870.2	1117.3	954.8	862.2	902	1262.2	1301.4	701.7	647.9	1053.7	1284.5
chrX	6106881	6109310	C15H9.7	23.6	26.1	30.9	22.3	33.4	28.8	23.3	21	23.8	23.1	23.4	26.9	30.8	31.2	35	14	17.1	21.6	29.7	22.8	28.6	24.5	54.6	49.2	13.4	16.8	30.6	54.2	21.6	20.6	16.3	27.9	27.8	24.8	33.5	15.2	16	20.6	15.8	19	15.4	14.1	21.8	11	11.4
chrX	6110759	6112881	C15H9.8	27.3	36.1	40.4	26.3	11.5	6.1	10.1	13.3	9.9	10.1	31.8	21.6	34.5	40	29.9	35.3	47	16.4	6.9	10.7	8.4	7.1	6	6.6	34.6	35.9	8.9	9.1	33.6	36	22.2	18.2	18.4	20.3	21	28.6	24.5	27.7	19	33.4	28.1	15.5	24	25.6	29.2
chrX	6127418	6128291	C15H9.9	362.5	239.9	380.3	324.1	286.2	237.6	247.9	217.9	217.4	226.2	417.2	400.7	395	457.9	500.6	1.1	0.6	342.6	259.7	276.7	284.9	134.2	185.6	178.7	0	0.7	253	195	408.8	83.3	223.1	364.2	517.4	503.6	544.8	319	494	445.6	478.3	146.3	207.8	327.3	390.6	320.9	278.3
chrII	4247191	4255284	C16A11.1	1	0.9	0.7	0.4	0.1	0	0	0	0.1	0.1	0.4	0.4	0.5	1.1	0.6	0.1	0	0.4	0.1	0.3	0.3	0.2	0.4	0.3	0.2	0.2	0.1	0.6	0.5	0.2	0.5	0.6	0.3	0.4	0.4	0.3	0.6	0.7	0.4	0.3	0.5	1	0.8	1	0.6
chrII	4231385	4234623	C16A11.10	3.7	0.8	1.9	0.9	4.9	7.3	5.6	6.8	7.2	6.2	1.6	2.2	1.4	0.7	0.7	1.9	1.9	0.7	5.4	4.5	4.8	3.6	3.3	2.7	3.1	3.1	3.8	3	1	1.8	3.1	0.7	0.5	0.9	0.8	1.7	1.2	1.1	1.5	1.3	1.4	0.2	0.8	1.3	1.6
chrII	4238175	4244835	C16A11.2	12.7	9.4	14.5	6	25.7	25.4	20.8	25.9	25.9	26	10.9	9.3	9	7.9	8.8	29.5	30.4	5.7	16.9	15.8	21.2	9.1	9.8	9.1	29	28.5	18.8	12.3	6.7	22.1	23.6	10.6	8.1	8.2	7.4	20.1	13.8	12.3	12.7	23.5	18.5	10.2	8.3	17.6	20.6
chrII	4229588	4230812	C16A11.3	3.3	3.7	3.4	2.9	14.6	15.2	15.7	18.9	12.8	17	6.2	8.9	6.5	3	2.5	1.8	2.2	1.5	11.9	10.8	12	12.1	10.4	9	2	2.2	10.8	12.2	4	1.6	2.8	3.5	4.2	4.5	4.4	2.5	2.2	2.7	2.4	2.6	1.6	0.5	2.9	2.8	2.3
chrII	4227048	4229171	C16A11.4	16.6	11.6	17.8	10.7	49.4	59	55	54.5	53.3	55.3	26.3	27.4	21.3	10.1	8.8	53.7	42.8	6.9	47.5	44.9	46.3	39.8	33.8	30.8	53.5	45.1	48	43.2	9.8	34.1	33.8	12.5	12.9	13.9	10.6	25.5	13.9	12.3	15.3	25.7	23.7	4.5	9.8	22.8	26.3
chrII	4223316	4226333	C16A11.5	1	0.9	2	1	4.9	5.1	4.6	5.7	4.7	6.1	2.5	2.2	1.6	0.9	0.6	0	0.1	0.7	4	3.6	4.8	1.9	2.8	2.5	0.3	0.1	3.8	3.1	1.6	0.6	1	1.1	1.3	1.7	1	0.5	0.9	0.7	1.5	0.4	0.5	0.4	0.9	0.6	0.8
chrII	4236503	4237752	C16A11.6	2	2	2.8	1.7	27	27.9	20.9	31.1	23.7	36.3	3.9	3.8	3.1	1.8	1	26	20.3	0.8	21	14.5	23.6	13.6	12.4	12.2	23.3	20.6	18.5	14.8	2.6	19.8	17.4	2.2	1.5	2.3	2.5	14.3	7.1	7.6	7.9	11.6	13.2	0.9	1.3	7.3	10.9
chrII	4255507	4256942	C16A11.7	0	0	0	0.2	8.6	3.4	11.8	7.7	4.6	5.6	0.1	0.2	0	0	0.1	1.1	0	0.1	5.2	12.1	6.2	116.6	117.7	123.6	0.6	0.8	3.6	122.9	0	0.3	1.1	0	0.4	0	0	0.6	0.4	0	0.4	0.4	0.2	0	0.3	0.2	0.5
chrII	4257094	4258784	C16A11.8	0.3	0.1	0	0	0	0	0	0.1	0	0	0.2	0	0	0.5	0.1	0.4	0	0	0	0	0	69.5	49.4	57.1	0.8	1.3	0.2	117	0	0.9	0.3	0	0	0	0	0.4	0	0	0	0.4	0.1	0	0.1	0	0
chrII	4234952	4235985	C16A11.9	1.5	0.5	1	1.1	3.3	3.1	2.5	6.4	4.6	5.6	2.2	2.9	1.8	0.9	1	0.5	0.2	0.5	3.8	3.2	3.2	2.9	3.7	5.6	0.5	0.5	3.1	4.3	1.5	0.6	2.5	2.3	1.8	1.5	1.5	0.9	1.3	0.6	1.4	1.1	0.8	1.1	2.3	1.5	1.3
chrIII	6390892	6393790	C16A3.1	6.2	5	7.3	5.3	19.1	18.5	16.4	19.9	17.5	19.3	9	8.3	7.8	6	6.3	23.1	23.9	4.8	13.5	12.5	13.1	10.4	10.4	9.4	24	23.4	12.9	12.1	5.8	28.1	19.4	3.9	6.5	6.8	7.3	17.8	13.7	18.9	16.7	25.1	25.1	7.5	10.4	14.2	14.1
chrIII	6394180	6396129	C16A3.10	122	102.8	144	110.3	156.2	141.9	141.3	132.7	136	145.7	204.3	185.3	154.4	118.9	167.9	84.4	81.3	162.1	139	147.4	145.4	143	228.9	249.4	81.2	76.7	123.1	272.6	100.8	42	33.7	118.7	167.1	160.4	157.1	65	47.6	71	54.9	49.9	42.7	101.4	132.9	39.7	40.5
chrIII	6389779	6390785	C16A3.2	4	4	5.8	3.8	21.7	19.3	19	20.2	21.6	26	5	5.4	3	3.8	4.2	8.1	9.9	1.9	11.6	10.8	12.6	3.4	3.8	3	6	7.2	12.6	4.5	5.4	12.5	12.9	4.9	6.1	7.1	6.9	10.6	10.3	11.3	14.1	10.9	9.9	7.8	6	9	9
chrIII	6383498	6389360	C16A3.3	32.3	19.4	39.5	17.5	37.2	35.3	36.8	43.9	39.4	46	29.8	31.9	25.7	25.4	19.3	34	34.2	20.2	30.1	24.1	29.1	15.7	17.9	16	33.4	33.8	26.4	22	16.2	32.9	32.5	20	23.3	22.4	18.4	24.9	19.3	28.2	24.3	23.4	31.3	19.4	31.2	25.7	25.9
chrIII	6381578	6382971	C16A3.4	57.6	70.7	83.6	50.6	76.2	77.8	76.8	79.5	81.6	91.4	64.1	57.2	52.6	80.5	48.2	141.7	159.9	42.4	65.1	64.4	64.2	55.5	43.2	40.6	135.3	147.4	58.1	45.3	49.4	114.7	106.9	61.6	61.3	61.2	65.2	100.5	72.4	85.6	69.5	110	105.1	60	84	95.5	100
chrIII	6380641	6381929	C16A3.5	366.9	358.6	324.4	429.2	350.6	333.9	378.9	321.6	310.8	325.5	518.1	463.7	528.8	464.8	504.9	368.6	356.9	455.8	329.3	328.9	341.4	434.4	401.7	421.8	386.6	378.1	328.6	443.4	466.6	296.1	261.7	401	460.4	519	517.7	348.3	396.7	290.3	248.4	250.9	301.6	316.1	405.3	282	287.6
chrIII	6379395	6380621	C16A3.6	107.5	138.8	156	80	64.3	58.6	66.2	67.2	59.9	69.2	65.9	64.4	64.1	110.5	65.9	77.7	87.9	59	64.5	78.9	66.2	79.6	57.5	57.8	81.7	88.1	60.8	59.1	74.6	135.3	174.4	91.9	62	68.7	76.1	127.6	118.7	106.7	96.4	164.3	144.6	65	100.3	188	146.3
chrIII	6375325	6379124	C16A3.7	19.8	13.1	41.7	15.9	41.9	44.9	42.3	48.2	44.2	49.1	18.3	19.3	20.1	13.1	12.6	44.3	43	11.9	38	29.3	38.6	38.5	27.2	23.3	41.9	41.7	37.2	28.6	16.2	39.7	32.8	18.4	14.8	17	16.4	24.6	18.6	25.9	21.8	33.3	32.7	11.2	16.7	21.1	23.4
chrIII	6367988	6374039	C16A3.8	20.8	12.4	22.6	12.5	27.2	24.4	24.6	28.2	26.3	31.3	13.4	15.6	12.6	15.3	13.6	56.6	55.6	8.9	23.1	19.1	22.9	21.7	21.5	19.8	56.6	52.2	22.3	24.9	9.2	41.6	33.3	12.7	13.5	13	12.4	33.5	22.9	33.5	32.2	39	36.6	12.8	14	27	33.3
chrIII	6374040	6374950	C16A3.9	751.9	2304.2	777.8	3114.1	1810	2156	1988.7	2158.4	1897.4	2482.8	3156.6	3411.5	3275.6	2535.7	2723.2	381	476.7	3030.3	1867.7	2004.3	1770.5	1685.9	1518.2	1473.3	378.7	410.3	1578.6	1566.5	3457	768.1	698.1	3906.6	3827	4001.1	3702.4	1081.2	1773.2	1146.9	956.1	577.2	767.5	1837.1	2647.7	815.3	756.8
chrX	3958476	3961886	C16B8.1	10.4	10.3	10.2	8.8	5.3	4.6	4.7	4	4.4	3.8	10.4	11	10.9	10.9	9.1	1.2	1.7	8.8	3.5	4.6	4.7	6.5	5.2	4.6	1.3	1.4	3.4	7.8	10.2	5.3	7	12.2	9.8	8.1	9.9	10.1	12.4	12.5	12.4	6.1	7.5	11.2	9.1	12.1	7
chrX	3961872	3966302	C16B8.2	1.8	0.8	1.6	1.7	0.4	0.2	0.4	0.3	0.2	0.4	1.4	1.4	0.9	1.1	0.6	0.1	0.1	1.4	0.2	0.7	0.1	0.3	0.2	0.2	0.2	0.1	0.1	0.3	1.6	1.1	1.3	2.2	1.1	1.4	0.7	3.3	4.4	5.6	5.7	1.7	2.5	2.1	1	2.8	2.3
[truncated: 18,493 more rows]

## Sheet: bc4289.l2
gene	baseMean	log2FoldChange	lfcSE	stat	pvalue	padj
[truncated: 18,173 more rows]

[truncated: 6 more sheets: bc4289.ya, sp117.emb, sp117.l2, sp117.ya, ty1916.emb, OP37]
