# Supplementary material for: Increased gene dosage and mRNA expression from chromosomal duplications in C. elegans
Source: bioRxiv preprint, doi:10.1101/2022.03.22.485368, version 2 (2022-05-13)
Supplement: Supplemental File 5 [file 485368_file07.xlsx]

## Sheet: README
gene	from C.elegans reference WS220
Gene Public Name	from C.elegans reference WS220
Enrichment Analysis	Wormbase Tools Enrichment Analysis
PHA-4 L3 peaks	https://epic.gs.washington.edu/modERN/
Overlap analysis for PHA-4 bound genes	TSS+/-1kb Wormbase WS220 genes with PHA-4 L3 peaks

## Sheet: PHA-4_bound
Overlap with PHA-4 L3 peaks downloaded from modERN database for PHA-4 L3	PHA-4 bound genes in L3:
6R55.2	6R55.2
AC3.2	ugt-49
AC3.7	ugt-1
AC3.8	ugt-2
AH10.1	acs-10
AH10.3	AH10.3
AH10.4	AH10.4
AH9.7	AH9.7
B0001.1	lin-24
B0001.4	B0001.4
B0024.11	B0024.11
B0024.12	gna-1
B0024.13	B0024.13
B0024.14	crm-1
B0035.1	B0035.1
B0035.12	B0035.12
B0035.14	dnj-1
B0035.15	B0035.15
B0035.2	dnj-2
B0035.3	B0035.3
B0035.4	pfd-4
B0035.5	gspd-1
B0041.3	B0041.3
B0041.4	rpl-4
B0041.5	B0041.5
B0041.6	ptps-1
B0041.7	xnp-1
B0041.8	B0041.8
B0205.11	B0205.11
B0205.12	B0205.12
B0205.13	B0205.13
B0205.7	kin-3
B0205.8	B0205.8
B0212.4	B0212.4
B0213.11	cyp-34A6
B0213.15	cyp-34A9
B0218.1	faah-1
B0218.2	faah-2
B0218.6	clec-51
B0222.9	B0222.9
B0228.7	B0228.7
B0238.10	B0238.10
B0238.11	B0238.11
B0250.1	rpl-2
B0250.2	B0250.2
B0250.5	B0250.5
B0252.4	cyn-10
B0261.8	B0261.8
B0272.2	memb-1
B0272.3	B0272.3
B0272.4	B0272.4
B0280.1	ggtb-1
B0280.10	pot-1
B0280.3	rpia-1
B0280.4	odd-1
B0280.9	B0280.9
B0285.1	cdtl-7
B0285.3	B0285.3
B0285.4	B0285.4
B0285.8	ckb-1
B0286.3	B0286.3
B0286.4	ntl-2
B0302.5	B0302.5
B0303.2	B0303.2
B0303.4	B0303.4
B0303.7	B0303.7
B0310.5	ugt-46
B0310.6	B0310.6
B0334.11	ooc-3
B0334.4	B0334.4
B0336.1	wrm-1
B0336.10	rpl-23
B0336.11	B0336.11
B0336.12	B0336.12
B0336.13	B0336.13
B0336.2	arf-1.2
B0336.3	B0336.3
B0336.4	rgs-5
B0336.5	B0336.5
B0336.6	abi-1
B0336.7	B0336.7
B0336.8	lgg-3
B0336.9	swp-1
B0348.1	B0348.1
B0348.6	ife-3
B0350.2	unc-44
B0361.11	B0361.11
B0361.2	B0361.2
B0361.3	B0361.3
B0361.6	B0361.6
B0365.3	eat-6
B0379.3	mut-16
B0379.4	scpl-1
B0379.6	B0379.6
B0393.1	rps-0
B0393.2	rbg-3
B0393.3	B0393.3
B0395.1	nhx-1
B0395.3	B0395.3
B0403.4	tag-320
B0412.4	rps-29
B0414.8	vps-51
B0432.10	B0432.10
B0432.4	misc-1
B0457.2	B0457.2
B0462.1	B0462.1
B0464.1	dars-1
B0464.2	B0464.2
B0464.3	nlp-36
B0464.5	spk-1
B0464.6	B0464.6
B0464.7	baf-1
B0464.8	tag-342
B0464.9	B0464.9
B0491.1	B0491.1
B0491.5	B0491.5
B0491.6	B0491.6
B0495.2	B0495.2
B0495.5	B0495.5
B0495.6	B0495.6
B0495.7	B0495.7
B0496.1	B0496.1
B0496.7	valv-1
B0507.2	B0507.2
B0507.3	B0507.3
B0511.1	fkb-7
B0511.10	eif-3.E
B0511.14	B0511.14
B0513.1	lin-66
B0513.2	B0513.2
B0513.3	rpl-29
B0513.9	B0513.9
B0523.5	fli-1
B0524.6	B0524.6
B0546.1	mai-2
B0546.4	B0546.4
B0547.1	csn-5
B0563.4	tmbi-4
B0564.1	exos-4.1
BE0003N10.1	BE0003N10.1
BE0003N10.2	chin-1
C01A2.4	C01A2.4
C01B10.10	C01B10.10
C01B10.3	C01B10.3
C01B10.4	C01B10.4
C01B10.44	C01B10.44
C01B10.5	hil-7
C01B10.9	C01B10.9
C01B12.8	C01B12.8
C01B7.1	ztf-12
C01B7.3	#N/A
C01B9.1	C01B9.1
C01C10.2	C01C10.2
C01C7.1	ark-1
C01F1.2	sco-1
C01F6.4	fem-3
C01F6.6	tag-60
C01G10.10	C01G10.10
C01G10.11	unc-76
C01G10.15	C01G10.15
C01G10.16	C01G10.16
C01G10.17	C01G10.17
C01G10.6	C01G10.6
C01G10.7	C01G10.7
C01G10.8	C01G10.8
C01G10.9	C01G10.9
C01G5.8	fan-1
C01G6.5	C01G6.5
C01G6.6	tag-165
C01G6.7	acs-7
C01G8.3	dhs-1
C01G8.5	erm-1
C01G8.9	let-526
C01H6.9	C01H6.9
C02B10.1	ivd-1
C02B10.2	C02B10.2
C02B10.3	C02B10.3
C02B10.4	C02B10.4
C02B10.5	C02B10.5
C02B4.2	nhr-17
C02B4.3	#N/A
C02B8.6	C02B8.6
C02C6.1	dyn-1
C02D5.2	C02D5.2
C02D5.4	C02D5.4
C02F12.4	tag-52
C02F12.9	C02F12.9
C02F4.1	ced-5
C02F4.2	tax-6
C02F5.1	knl-1
C02F5.10	C02F5.10
C02F5.11	tsp-2
C02F5.12	C02F5.12
C02F5.2	#N/A
C02F5.4	cids-1
C02F5.6	C02F5.6
C02F5.8	tsp-1
C02F5.9	pbs-6
C02H6.2	fbxa-105
C03A3.2	C03A3.2
C03A3.3	C03A3.3
C03A7.13	C03A7.13
C03A7.14	abu-8
C03B1.12	lmp-1
C03B1.13	C03B1.13
C03B8.3	C03B8.3
C03B8.4	lin-13
C03C10.1	kin-19
C03D6.3	cel-1
C03D6.4	npp-14
C03D6.8	rpl-24.2
C03E10.4	gly-20
C03F11.4	C03F11.4
C03G5.1	sdha-1
C03G6.19	srp-6
C03H12.1	C03H12.1
C04A11.2	C04A11.2
C04A11.4	adm-2
C04A11.5	C04A11.5
C04A2.1	tbc-6
C04A2.3	egl-27
C04A2.7	dnj-5
C04C11.2	arrd-25
C04C3.3	C04C3.3
C04C3.5	dyf-3
C04E7.2	sor-3
C04F12.3	ikb-1
C04F12.4	rpl-14
C04F5.1	sid-1
C04F5.9	C04F5.9
C04F6.4	unc-78
C04G6.1	mpk-2
C04G6.11	#N/A
C04G6.2	C04G6.2
C04G6.3	pld-1
C04G6.5	C04G6.5
C04H5.6	mog-4
C05A9.2	C05A9.2
C05B5.7	rgs-1
C05C10.3	C05C10.3
C05C10.4	pho-11
C05C10.6	ufd-3
C05C12.3	gtl-1
C05C12.4	C05C12.4
C05C8.2	C05C8.2
C05C8.4	gei-6
C05C8.6	C05C8.6
C05C8.9	hyls-1
C05D10.3	wht-1
C05D11.11	mel-32
C05D11.12	let-721
C05D11.13	C05D11.13
C05D11.7	C05D11.7
C05D12.2	C05D12.2
C05D12.3	C05D12.3
C05D2.1	daf-4
C05D2.5	xnd-1
C05D2.6	C05D2.6
C05D9.1	snx-1
C05D9.5	ife-4
C05E11.1	lnp-1
C05E11.3	C05E11.3
C05E11.5	amt-4
C05E4.14	srh-2
C05E4.9	gei-7
C05G5.2	C05G5.2
C05G5.4	C05G5.4
C05G5.5	C05G5.5
C05G5.7	C05G5.7
C06A1.1	cdc-48.1
C06A1.6	C06A1.6
C06A12.3	C06A12.3
C06A12.4	gcy-27
C06A12.5	lact-6
C06A5.1	C06A5.1
C06A5.3	C06A5.3
C06A5.6	C06A5.6
C06A5.9	rnf-1
C06A6.2	C06A6.2
C06A6.3	mvb-12
C06A6.5	C06A6.5
C06A8.1	C06A8.1
C06A8.2	C06A8.2
C06A8.3	C06A8.3
C06A8.5	spdl-1
C06A8.8	C06A8.8
C06B3.4	stdh-1
C06B3.6	C06B3.6
C06B3.7	C06B3.7
C06B8.2	C06B8.2
C06B8.3	C06B8.3
C06B8.7	C06B8.7
C06B8.8	rpl-38
C06C6.5	nhr-50
C06E1.10	rha-2
C06E7.1	sams-3
C06E7.3	sams-4
C06E8.3	prk-1
C06G1.4	ain-1
C06G3.1	nhr-105
C06G3.10	cogc-2
C06G3.11	tin-9.1
C06G3.2	klp-18
C06G3.3	C06G3.3
C06G3.5	C06G3.5
C06G3.6	C06G3.6
C06G3.7	trxr-1
C06G3.9	C06G3.9
C06G4.4	C06G4.4
C06H2.1	atp-5
C06H2.2	C06H2.2
C06H2.4	folt-1
C06H2.6	C06H2.6
C06H5.1	fbxa-156
C06H5.8	C06H5.8
C07A12.3	nhr-35
C07A12.4	pdi-2
C07A12.7	C07A12.7
C07A9.2	C07A9.2
C07A9.7	set-3
C07A9.8	C07A9.8
C07A9.9	C07A9.9
C07B5.5	nuc-1
C07D10.1	C07D10.1
C07D10.2	bath-44
C07D10.5	C07D10.5
C07D8.5	C07D8.5
C07D8.6	C07D8.6
C07E3.1	stip-1
C07E3.3	C07E3.3
C07E3.9	C07E3.9
C07G1.3	pct-1
C07G1.4	wsp-1
C07G2.3	cct-5
C07H4.1	C07H4.1
C07H4.2	clh-5
C07H6.1	lig-4
C07H6.2	C07H6.2
C07H6.4	C07H6.4
C07H6.5	cgh-1
C07H6.8	cux-7
C07H6.9	C07H6.9
C08A9.1	sod-3
C08A9.3	C08A9.3
C08B11.1	zyg-11
C08B11.3	C08B11.3
C08B11.7	ubh-4
C08B11.8	C08B11.8
C08B6.1	ugt-17
C08B6.2	C08B6.2
C08B6.7	C08B6.7
C08B6.8	C08B6.8
C08C3.2	bath-15
C08D8.2	tmd-2
C08E3.10	fbxa-158
C08E3.11	#N/A
C08E3.4	fbxa-161
C08E3.5	fbxa-162
C08E3.7	fbxa-164
C08E8.4	C08E8.4
C08F11.13	C08F11.13
C08F11.3	C08F11.3
C08F11.5	fbxa-98
C08F8.1	pfd-1
C08F8.2	C08F8.2
C08F8.9	C08F8.9
C08H9.16	C08H9.16
C08H9.2	C08H9.2
C09B7.2	C09B7.2
C09B8.1	ipp-5
C09B8.8	C09B8.8
C09D1.1	unc-89
C09D4.1	C09D4.1
C09D4.5	rpl-19
C09E7.4	C09E7.4
C09E7.7	C09E7.7
C09E8.1	C09E8.1
C09E9.1	C09E9.1
C09F12.1	clc-1
C09F5.2	orai-1
C09F9.3	glna-1
C09G1.2	C09G1.2
C09G4.1	hyl-1
C09G4.5	mes-6
C09G9.1	C09G9.1
C09G9.2	C09G9.2
C09G9.5	C09G9.5
C09H10.10	C09H10.10
C09H10.2	rpl-41
C09H10.3	nuo-1
C09H10.5	C09H10.5
C09H10.6	nasp-1
C09H6.3	mau-2
C10C5.1	C10C5.1
C10C5.6	daf-15
C10C6.5	wht-2
C10E2.2	C10E2.2
C10G11.5	pnk-1
C10G11.6	C10G11.6
C10G6.1	egal-1
C10H11.1	viln-1
C10H11.9	let-502
C11D2.2	C11D2.2
C11D2.4	C11D2.4
C11E4.1	C11E4.1
C11E4.2	C11E4.2
C11G6.1	taf-3
C11G6.4	nhr-28
C11H1.3	C11H1.3
C11H1.4	prx-1
C11H1.8	C11H1.8
C12C8.1	hsp-70
C12C8.2	C12C8.2
C12D12.5	sox-4
C12D8.1	C12D8.1
C12D8.10	akt-1
C12D8.11	rop-1
C12D8.14	fipr-4
C12D8.15	C12D8.15
C12D8.4	#N/A
C13B4.2	usp-14
C13B9.3	C13B9.3
C13C4.1	nhr-153
C13C4.2	nhr-154
C13C4.4	C13C4.4
C13C4.6	C13C4.6
C13C4.7	C13C4.7
C14A11.2	C14A11.2
C14A11.9	C14A11.9
C14A4.11	C14A4.11
C14A4.12	C14A4.12
C14A4.6	C14A4.6
C14B1.1	pdi-1
C14B1.2	C14B1.2
C14B1.3	C14B1.3
C14B1.4	wdr-5
C14B9.1	hsp-12.2
C14B9.10	C14B9.10
C14B9.2	C14B9.2
C14B9.3	C14B9.3
C14B9.4	plk-1
C14B9.6	gei-8
C14B9.7	rpl-21
C14B9.8	C14B9.8
C14C10.3	ril-2
C14C10.5	C14C10.5
C14C11.3	hex-2
C14C11.8	pqn-13
C14F11.1	C14F11.1
C14F11.4	C14F11.4
C14F11.5	hsp-43
C14F11.6	C14F11.6
C14F11.7	C14F11.7
C14F5.1	dct-1
C14F5.5	sem-5
C14H10.3	C14H10.3
C15B12.7	cdf-1
C15C6.3	C15C6.3
C15C7.2	klp-8
C15C7.5	C15C7.5
C15C8.1	C15C8.1
C15C8.2	cky-1
C15F1.4	ppp-1
C15F1.6	art-1
C15F1.7	sod-1
C15H11.11	C15H11.11
C15H11.3	nxf-1
C15H11.4	dhs-22
C15H11.7	pas-1
C15H11.8	C15H11.8
C15H7.4	C15H7.4
C15H9.1	nnt-1
C15H9.5	C15H9.5
C15H9.6	hsp-3
C15H9.9	C15H9.9
C16A11.2	C16A11.2
C16A11.6	fbxc-44
C16A3.10	C16A3.10
C16A3.6	C16A3.6
C16A3.7	tag-182
C16A3.8	thoc-2
C16A3.9	rps-13
C16B8.3	C16B8.3
C16C10.11	har-1
C16C10.12	wht-3
C16C10.4	C16C10.4
C16C10.5	rnf-121
C16C2.2	eat-16
C16E9.2	C16E9.2
C16H3.2	lec-9
C16H3.3	C16H3.3
C17C3.15	C17C3.15
C17C3.19	ins-12
C17C3.3	C17C3.3
C17D12.1	C17D12.1
C17D12.7	C17D12.7
C17E4.5	pabp-2
C17E4.6	C17E4.6
C17E4.9	nkb-1
C17G1.5	C17G1.5
C17G1.8	tsp-21
C17G10.10	C17G10.10
C17G10.2	C17G10.2
C17G10.4	cdc-14
C17G10.5	lys-8
C17H1.2	#N/A
C17H1.3	C17H1.3
C17H1.7	C17H1.7
C17H11.2	C17H11.2
C17H12.1	dyci-1
C17H12.13	C17H12.13
C17H12.14	vha-8
C17H12.2	C17H12.2
C18A11.1	C18A11.1
C18A11.7	dim-1
C18A3.10	C18A3.10
C18A3.4	C18A3.4
C18A3.5	tiar-1
C18A3.9	C18A3.9
C18B12.4	C18B12.4
C18B2.4	C18B2.4
C18B2.5	C18B2.5
C18C4.1	glb-5
C18C4.10	klc-2
C18D11.2	maa-1
C18D11.3	C18D11.3
C18D11.4	rsp-8
C18D4.6	C18D4.6
C18E3.2	C18E3.2
C18E3.3	C18E3.3
C18E3.4	C18E3.4
C18E3.8	hop-1
C18E3.9	C18E3.9
C18E9.11	ooc-5
C18E9.3	szy-20
C18E9.5	C18E9.5
C18E9.6	tomm-40
C18E9.9	C18E9.9
C18F10.7	C18F10.7
C18H9.3	C18H9.3
C23F12.1	fln-2
C23G10.3	rps-3
C23G10.4	rpn-2
C23G10.7	C23G10.7
C23G10.8	C23G10.8
C23H4.2	C23H4.2
C23H4.3	C23H4.3
C23H4.6	C23H4.6
C23H4.7	C23H4.7
C24A11.2	C24A11.2
C24A11.5	#N/A
C24A11.8	frm-4
C24A11.9	coq-1
C24A3.2	C24A3.2
C24B5.2	spas-1
C24B5.5	pqn-16
C24B9.9	dod-3
C24F3.1	tram-1
C24F3.2	C24F3.2
C24G6.1	syp-2
C24G6.4	nhr-47
C24G6.8	C24G6.8
C24H10.2	C24H10.2
C24H10.5	cal-5
C24H11.2	C24H11.2
C24H11.6	immp-1
C24H11.7	gbf-1
C24H12.4	C24H12.4
C24H12.5	C24H12.5
C25A1.10	dao-5
C25A1.11	aha-1
C25A1.12	C25A1.12
C25A1.13	C25A1.13
C25A1.15	C25A1.15
C25A1.16	#N/A
C25A1.4	C25A1.4
C25A1.6	C25A1.6
C25A1.8	clec-87
C25A1.9	rsa-1
C25A11.2	C25A11.2
C25A11.4	ajm-1
C25B8.1	kqt-1
C25B8.3	cpr-6
C25B8.6	nhr-120
C25D7.15	C25D7.15
C25D7.4	fbxa-82
C25D7.6	mcm-3
C25D7.8	otub-1
C25D7.9	#N/A
C25F6.1	C25F6.1
C25F6.2	dlg-1
C25F6.3	dpyd-1
C25F9.10	C25F9.10
C25F9.5	C25F9.5
C25F9.6	C25F9.6
C25F9.7	srw-86
C25G6.2	tsp-9
C25H3.1	C25H3.1
C25H3.10	C25H3.10
C25H3.11	C25H3.11
C25H3.12	C25H3.12
C25H3.4	C25H3.4
C25H3.6	mdt-26
C25H3.9	C25H3.9
C26B2.1	dnc-4
C26B2.6	elpc-4
C26B2.7	C26B2.7
C26B9.1	C26B9.1
C26C6.1	pbrm-1
C26C6.5	dcp-66
C26D10.1	ran-3
C26D10.2	hel-1
C26D10.3	C26D10.3
C26D10.4	C26D10.4
C26E6.6	C26E6.6
C26E6.9	set-2
C26F1.3	C26F1.3
C26F1.4	rps-30
C26F1.7	hint-3
C26F1.9	rpl-39
C27A12.10	mbd-2
C27A12.3	tag-146
C27A12.4	C27A12.4
C27A12.7	C27A12.7
C27A12.8	ari-1
C27A2.2	rpl-22
C27A2.3	ify-1
C27A2.6	dsh-2
C27B7.1	spr-2
C27B7.2	C27B7.2
C27B7.4	rad-26
C27C12.1	C27C12.1
C27C12.4	C27C12.4
C27D11.1	egl-45
C27D6.4	C27D6.4
C27F2.5	vps-22
C27F2.9	C27F2.9
C27H5.1	pdl-1
C27H5.3	fust-1
C28A5.2	C28A5.2
C28C12.10	tag-77
C28C12.2	mesp-1
C28C12.5	spp-8
C28C12.9	acdh-13
C28G1.1	ubc-23
C28G1.2	C28G1.2
C28G1.3	sec-15
C28G1.6	C28G1.6
C28H8.1	C28H8.1
C28H8.12	dnc-2
C28H8.4	C28H8.4
C28H8.9	C28H8.9
C29E4.12	C29E4.12
C29E4.13	C29E4.13
C29E4.15	C29E4.15
C29E4.2	kle-2
C29E4.4	npp-15
C29E4.5	tag-250
C29E4.7	gsto-1
C29E4.8	let-754
C29E6.2	trpa-1
C29F7.2	C29F7.2
C29F7.7	#N/A
C29F9.1	C29F9.1
C29F9.13	nhr-280
C29F9.2	C29F9.2
C29F9.4	C29F9.4
C29F9.7	pat-4
C29H12.2	C29H12.2
C29H12.6	C29H12.6
C30A5.3	C30A5.3
C30C11.1	C30C11.1
C30C11.2	rpn-3
C30C11.4	C30C11.4
C30F12.2	C30F12.2
C30F12.4	C30F12.4
C30F12.7	C30F12.7
C30F2.2	C30F2.2
C30F2.3	C30F2.3
C30F8.2	vha-16
C30G4.7	C30G4.7
C30G7.1	hil-1
C30H6.6	haf-1
C30H6.7	C30H6.7
C30H6.9	C30H6.9
C30H7.2	C30H7.2
C31C9.3	fbxa-167
C31E10.5	C31E10.5
C31E10.6	C31E10.6
C31E10.7	C31E10.7
C31H1.6	lntl-1
C31H5.4	C31H5.4
C32A3.2	C32A3.2
C32D5.1	C32D5.1
C32D5.11	C32D5.11
C32D5.3	C32D5.3
C32D5.5	set-4
C32D5.7	C32D5.7
C32D5.8	C32D5.8
C32D5.9	lgg-1
C32E8.10	unc-11
C32E8.2	rpl-13
C32E8.4	C32E8.4
C32E8.5	C32E8.5
C32E8.7	ric-19
C32F10.1	obr-4
C32F10.2	lin-35
C32F10.4	C32F10.4
C32F10.8	C32F10.8
C33A11.1	C33A11.1
C33A11.2	C33A11.2
C33A11.4	tag-97
C33A12.1	C33A12.1
C33A12.3	C33A12.3
C33A12.4	C33A12.4
C33A12.7	C33A12.7
C33C12.1	#N/A
C33C12.10	C33C12.10
C33C12.3	C33C12.3
C33D12.3	twk-26
C33D3.1	elt-2
C33D9.1	exc-5
C33D9.13	C33D9.13
C33D9.8	C33D9.8
C33G3.4	C33G3.4
C33G8.11	nhr-107
C33G8.6	nhr-42
C33H5.10	tag-322
C33H5.11	imp-3
C33H5.12	rsp-6
C33H5.13	C33H5.13
C33H5.14	ntp-1
C33H5.18	C33H5.18
C33H5.7	swd-2.2
C33H5.9	sec-10
C34B2.1	tag-272
C34B2.10	C34B2.10
C34B2.11	C34B2.11
C34B2.2	kbp-5
C34B2.6	C34B2.6
C34B2.8	C34B2.8
C34B4.2	C34B4.2
C34B4.4	C34B4.4
C34B7.1	C34B7.1
C34B7.4	mys-4
C34C12.2	C34C12.2
C34C12.5	C34C12.5
C34C12.8	C34C12.8
C34C6.2	C34C6.2
C34C6.5	sphk-1
C34C6.9	#N/A
C34D10.1	C34D10.1
C34D10.2	C34D10.2
C34E10.10	C34E10.10
C34E10.3	gop-1
C34E10.5	prmt-5
C34E10.6	atp-2
C34E10.8	C34E10.8
C34E11.1	rsd-3
C34E11.3	tag-241
C34E11.7	C34E11.7
C34E7.1	pqn-18
C34F11.3	C34F11.3
C34F6.1	C34F6.1
C34F6.11	C34F6.11
C34F6.4	hst-2
C34F6.6	C34F6.6
C34G6.7	stam-1
C35B1.2	C35B1.2
C35B1.5	C35B1.5
C35B8.3	C35B8.3
C35B8.4	C35B8.4
C35C5.10	C35C5.10
C35C5.3	C35C5.3
C35D10.14	clec-5
C35D10.15	clec-6
C35E7.4	C35E7.4
C35E7.9	C35E7.9
C36A4.2	cyp-25A2
C36A4.4	C36A4.4
C36A4.5	C36A4.5
C36A4.8	brc-1
C36A4.9	acs-19
C36B1.13	C36B1.13
C36B1.3	rpb-3
C36B1.4	pas-4
C36B1.5	prp-4
C36B1.6	C36B1.6
C36B1.7	dhfr-1
C36B1.8	gls-1
C36E6.1	C36E6.1
C36E6.2	C36E6.2
C36E6.5	mlc-2
C36E8.1	C36E8.1
C36H8.2	inx-6
C37A2.2	pqn-20
C37A2.4	cye-1
C37A2.5	pqn-21
C37A2.7	C37A2.7
C37A2.8	C37A2.8
C37C3.12	C37C3.12
C37C3.13	ttr-33
C37C3.2	C37C3.2
C37C3.7	C37C3.7
C37C3.8	tag-253
C37C3.9	C37C3.9
C37E2.1	C37E2.1
C37H5.13	C37H5.13
C37H5.2	C37H5.2
C37H5.3	C37H5.3
C37H5.5	C37H5.5
C37H5.6	C37H5.6
C37H5.8	hsp-6
C38C10.4	gpr-2
C38C10.5	rgr-1
C38C3.5	unc-60
C38C6.2	atgp-2
C38D4.1	C38D4.1
C38D4.3	mel-28
C38D4.5	tag-325
C39B10.7	C39B10.7
C39B5.2	C39B5.2
C39B5.9	fbxa-47
C39D10.1	#N/A
C39D10.8	C39D10.8
C39D10.9	#N/A
C39E9.10	C39E9.10
C39E9.11	C39E9.11
C39E9.12	C39E9.12
C39E9.14	dli-1
C39F7.4	rab-1
C39F7.5	C39F7.5
C39H7.4	C39H7.4
C40D2.2	math-20
C40H1.5	ttr-5
C40H1.6	C40H1.6
C40H1.9	C40H1.9
C40H5.1	#N/A
C40H5.4	lact-7
C41C4.4	ire-1
C41C4.6	ulp-4
C41C4.7	ctns-1
C41C4.8	cdc-48.2
C41D11.2	eif-3.H
C41D11.3	C41D11.3
C41D11.4	C41D11.4
C41D11.5	C41D11.5
C41G11.3	rgs-6
C41G7.1	smn-1
C41G7.2	klp-16
C41G7.8	C41G7.8
C41G7.9	C41G7.9
C42C1.10	C42C1.10
C42C1.12	C42C1.12
C42C1.14	rpl-34
C42C1.2	C42C1.2
C42D4.1	C42D4.1
C42D4.13	C42D4.13
C42D8.1	C42D8.1
C42D8.8	apl-1
C43C3.1	ifp-1
C43E11.1	acin-1
C43E11.10	cdc-6
C43E11.12	C43E11.12
C43E11.3	met-1
C43E11.4	tufm-2
C43E11.7	ndx-7
C43E11.8	exoc-7
C43G2.1	paqr-1
C43G2.2	bicd-1
C43G2.5	try-3
C43H6.7	C43H6.7
C44B7.10	C44B7.10
C44B7.9	pmp-2
C44B9.1	C44B9.1
C44B9.4	athp-1
C44B9.5	com-1
C44C1.4	vps-45
C44C1.5	C44C1.5
C44C10.4	C44C10.4
C44C11.1	ras-1
C44C8.6	mak-2
C44E4.2	C44E4.2
C44E4.4	C44E4.4
C44E4.6	acbp-1
C44F1.3	lec-4
C44F1.5	acy-3
C44H4.1	C44H4.1
C44H4.4	C44H4.4
C44H4.5	tap-1
C44H4.7	eor-2
C45B11.1	pak-2
C45B11.6	C45B11.6
C45B11.8	#N/A
C45B11.9	C45B11.9
C45B2.5	gln-1
C45B2.6	C45B2.6
C45E5.3	C45E5.3
C45E5.6	nhr-46
C45G9.5	C45G9.5
C45G9.6	C45G9.6
C45G9.7	C45G9.7
C46A5.9	hcf-1
C46C11.1	C46C11.1
C46C2.2	C46C2.2
C46C2.6	C46C2.6
C46F11.2	gsr-1
C46F11.3	C46F11.3
C46F11.4	C46F11.4
C46F11.6	C46F11.6
C46F4.2	acs-17
C46H11.2	C46H11.2
C47A10.1	pgp-9
C47B2.2	C47B2.2
C47B2.3	tba-2
C47B2.4	pbs-2
C47B2.5	eif-6
C47D12.6	tars-1
C47D12.7	kel-1
C47D2.2	cdd-1
C47E12.1	sars-1
C47E12.2	C47E12.2
C47E12.4	pyp-1
C47E12.5	uba-1
C47E8.11	C47E8.11
C47E8.4	C47E8.4
C47E8.5	daf-21
C47E8.6	C47E8.6
C47E8.7	unc-112
C47G2.3	C47G2.3
C47G2.4	C47G2.4
C47G2.5	saps-1
C48A7.2	C48A7.2
C48B4.3	C48B4.3
C48B4.4	ced-7
C48B6.3	C48B6.3
C48B6.6	smg-1
C49A9.10	C49A9.10
C49A9.3	C49A9.3
C49A9.6	C49A9.6
C49A9.8	ugt-24
C49A9.9	C49A9.9
C49C3.10	C49C3.10
C49C3.15	C49C3.15
C49C3.5	C49C3.5
C49C3.6	C49C3.6
C49C3.7	C49C3.7
C49C3.8	C49C3.8
C49C8.2	C49C8.2
C49C8.4	cyp-33E1
C49F8.2	C49F8.2
C49H3.10	xpo-3
C49H3.3	C49H3.3
C49H3.5	ntl-4
C49H3.6	C49H3.6
C49H3.8	arp-11
C49H3.9	C49H3.9
C50B6.2	nasp-2
C50B6.3	C50B6.3
C50B8.1	C50B8.1
C50B8.2	bir-2
C50B8.3	C50B8.3
C50B8.4	C50B8.4
C50B8.5	C50B8.5
C50B8.6	C50B8.6
C50C3.6	prp-8
C50C3.8	bath-42
C50D2.5	C50D2.5
C50D2.8	C50D2.8
C50E10.4	sop-2
C50E3.5	C50E3.5
C50F2.3	C50F2.3
C50F4.11	mdf-1
C50F4.13	his-35
C50F4.14	C50F4.14
C50F4.5	his-41
C50F4.6	#N/A
C50F4.7	his-37
C50H11.15	cyp-33C9
C50H2.1	fshr-1
C50H2.13	C50H2.13
C51E3.10	C51E3.10
C51F7.1	frm-7
C52A10.1	C52A10.1
C52B11.5	C52B11.5
C52B9.11	C52B9.11
C52B9.3	coel-1
C52B9.4	C52B9.4
C52E12.1	C52E12.1
C52E12.4	C52E12.4
C52E12.6	C52E12.6
C52E2.2	#N/A
C52E2.3	C52E2.3
C52E2.4	C52E2.4
C52E2.5	C52E2.5
C52E4.1	cpr-1
C52E4.3	snr-4
C52E4.4	rpt-1
C52E4.6	cyl-1
C52E4.7	C52E4.7
C53A3.2	C53A3.2
C53B4.3	C53B4.3
C53B7.1	rig-3
C53B7.3	C53B7.3
C53B7.4	asg-2
C53C11.2	C53C11.2
C53C11.3	ptr-5
C53C11.5	C53C11.5
C53C9.2	C53C9.2
C53D5.1	C53D5.1
C53D5.4	ztf-3
C53D5.6	imb-3
C53D6.11	C53D6.11
C53D6.4	C53D6.4
C53D6.6	C53D6.6
C53H9.1	rpl-27
C53H9.2	C53H9.2
C53H9.3	C53H9.3
C54C6.1	rpl-37
C54C6.2	ben-1
C54C6.7	C54C6.7
C54D1.5	lam-2
C54D10.1	cdr-2
C54D10.10	C54D10.10
C54D10.7	dct-3
C54E10.5	nhr-170
C54F6.14	ftn-1
C54G10.1	C54G10.1
C54G10.2	rfc-1
C54G4.1	rskn-2
C54G4.7	C54G4.7
C54G4.8	cyc-1
C54G7.2	mboa-3
C54G7.3	lgx-1
C54H2.1	sym-3
C54H2.3	tag-294
C54H2.5	sft-4
C55A1.6	C55A1.6
C55A1.7	C55A1.7
C55A6.1	C55A6.1
C55A6.10	C55A6.10
C55A6.11	C55A6.11
C55A6.3	C55A6.3
C55A6.5	sdz-8
C55A6.6	C55A6.6
C55A6.9	C55A6.9
C55B7.2	gly-2
C55B7.5	uri-1
C55B7.9	mdt-18
C55F2.1	C55F2.1
C55F2.2	ilys-4
C56A3.2	ttr-44
C56A3.4	C56A3.4
C56A3.5	C56A3.5
C56A3.6	C56A3.6
C56A3.7	cav-2
C56C10.12	epg-5
C56C10.13	dnj-8
C56C10.3	vps-32.1
C56C10.8	icd-1
C56E10.1	nhr-173
C56E10.3	C56E10.3
C56E6.9	C56E6.9
C56G2.15	C56G2.15
C56G2.3	C56G2.3
C56G2.6	#N/A
C56G2.7	C56G2.7
C56G2.9	C56G2.9
CC4.3	smu-1
CC8.1	CC8.1
CC8.2	CC8.2
CD4.11	CD4.11
CD4.4	vps-37
CD4.6	pas-6
CD4.7	CD4.7
cTel54X.1	fbxa-6
cTel55X.1	cTel55X.1
D1005.1	D1005.1
D1005.3	D1005.3
D1005.4	D1005.4
D1007.12	rpl-24.1
D1007.13	D1007.13
D1007.5	D1007.5
D1007.6	rps-10
D1009.1	acs-22
D1014.3	snap-1
D1014.8	spr-1
D1022.1	ubc-6
D1022.4	D1022.4
D1022.5	D1022.5
D1022.7	aka-1
D1025.11	#N/A
D1025.3	fbxa-141
D1025.8	nspc-17
D1037.1	D1037.1
D1037.2	smp-2
D1037.3	ftn-2
D1037.4	rab-8
D1046.1	cfim-2
D1046.2	D1046.2
D1053.1	gst-42
D1053.2	D1053.2
D1053.4	D1053.4
D1054.1	D1054.1
D1054.15	tag-135
D1054.18	D1054.18
D1054.2	pas-2
D1054.5	D1054.5
D1054.8	D1054.8
D1069.3	D1069.3
D2005.3	D2005.3
D2005.4	D2005.4
D2007.1	D2007.1
D2007.4	D2007.4
D2007.5	atg-13
D2013.1	rab-39
D2013.10	tag-175
D2013.2	wdfy-2
D2013.3	D2013.3
D2013.5	eat-3
D2013.8	scp-1
D2021.1	utx-1
D2021.2	tag-233
D2021.4	D2021.4
D2023.2	pyc-1
D2024.3	elo-3
D2024.4	D2024.4
D2024.6	cap-1
D2024.7	gstk-2
D2030.1	D2030.1
D2030.2	D2030.2
D2030.4	D2030.4
D2030.5	mce-1
D2030.9	wdr-23
D2045.1	atx-2
D2045.2	D2045.2
D2045.6	cul-1
D2045.8	D2045.8
D2063.3	D2063.3
D2085.1	pyr-1
D2085.3	D2085.3
D2085.5	D2085.5
D2085.6	D2085.6
D2089.1	rsp-7
D2096.2	praf-3
D2096.3	aagr-1
D2096.4	sqv-1
D2096.5	D2096.5
D2096.7	D2096.7
D2096.8	D2096.8
DC2.3	DC2.3
DH11.2	DH11.2
DY3.1	tin-13
DY3.2	lmn-1
DY3.6	mfb-1
DY3.8	DY3.8
E01A2.1	E01A2.1
E01A2.2	E01A2.2
E01A2.4	E01A2.4
E01A2.6	E01A2.6
E01B7.2	E01B7.2
E01G4.1	tbc-14
E01G4.3	E01G4.3
E01G4.4	pqn-27
E01G6.3	E01G6.3
E02C12.12	E02C12.12
E02D9.1	E02D9.1
E02H1.1	E02H1.1
E02H1.3	tag-124
E02H1.7	nhr-19
E02H9.4	E02H9.4
E02H9.8	nhr-121
E03A3.2	rcq-5
E03A3.3	his-69
E03G2.2	mrp-3
E04A4.5	E04A4.5
E04A4.6	E04A4.6
E04A4.7	cyc-2.1
E04A4.8	rpl-20
E04D5.1	E04D5.1
E04F6.2	E04F6.2
E04F6.3	maoc-1
E04F6.6	E04F6.6
EEED8.1	mel-47
EEED8.10	EEED8.10
EEED8.2	EEED8.2
EEED8.5	mog-5
EEED8.8	ndx-6
EGAP1.1	EGAP1.1
EGAP9.2	fut-2
EGAP9.4	EGAP9.4
F01D4.1	ugt-43
F01D4.5	F01D4.5
F01E11.4	tsp-16
F01F1.1	F01F1.1
F01F1.10	eng-1
F01F1.11	F01F1.11
F01F1.12	aldo-2
F01F1.13	F01F1.13
F01F1.15	F01F1.15
F01F1.2	F01F1.2
F01F1.4	rabn-5
F01F1.5	dpf-4
F01F1.6	alh-9
F01F1.7	ddx-23
F01F1.8	cct-6
F01F1.9	F01F1.9
F01G10.1	tkt-1
F01G10.8	daf-14
F01G12.6	F01G12.6
F01G4.1	psa-4
F01G4.2	ard-1
F01G4.3	F01G4.3
F01G4.4	F01G4.4
F01G4.5	F01G4.5
F01G4.6	F01G4.6
F02C12.1	F02C12.1
F02C12.3	F02C12.3
F02D8.4	F02D8.4
F02E11.7	F02E11.7
F02E8.1	asb-2
F02E8.5	atg-16.1
F02E8.6	ncr-1
F02E9.1	F02E9.1
F02E9.2	lin-28
F02E9.3	F02E9.3
F02E9.4	sin-3
F02E9.5	F02E9.5
F02E9.7	F02E9.7
F02G3.1	ncam-1
F02H6.5	sqrd-1
F07A11.3	npp-5
F07A11.4	F07A11.4
F07A11.5	F07A11.5
F07A11.6	din-1
F07A5.3	scav-6
F07C3.4	glo-4
F07C3.9	F07C3.9
F07D10.1	rpl-11.2
F07F6.8	F07F6.8
F07H5.13	F07H5.13
F07H5.2	sgn-1
F08A7.1	F08A7.1
F08A8.1	acox-1
F08B1.1	vhp-1
F08B12.3	slo-2
F08B12.4	F08B12.4
F08B4.1	dic-1
F08B4.6	hst-1
F08B4.7	F08B4.7
F08B6.1	F08B6.1
F08B6.2	gpc-2
F08B6.3	F08B6.3
F08B6.4	unc-87
F08C6.3	vps-52
F08C6.5	F08C6.5
F08C6.6	apy-1
F08C6.7	unc-98
F08F1.3	F08F1.3
F08F1.6	spp-13
F08F1.7	tag-123
F08F1.8	tth-1
F08F3.2	acl-6
F08F3.8	F08F3.8
F08F8.10	F08F8.10
F08F8.2	F08F8.2
F08F8.4	F08F8.4
F08F8.9	F08F8.9
F08G12.2	F08G12.2
F08G12.3	F08G12.3
F08G12.5	F08G12.5
F08G2.4	F08G2.4
F08G2.5	F08G2.5
F08G2.6	ins-37
F08G5.3	F08G5.3
F08H9.3	F08H9.3
F09B12.2	dhhc-1
F09B12.3	F09B12.3
F09B12.7	F09B12.7
F09B9.1	oac-14
F09B9.2	unc-115
F09C12.2	F09C12.2
F09C6.11	F09C6.11
F09C6.12	F09C6.12
F09C6.16	#N/A
F09C8.1	F09C8.1
F09C8.2	F09C8.2
F09D1.1	F09D1.1
F09E10.1	F09E10.1
F09E10.3	dhs-25
F09E10.6	F09E10.6
F09E5.1	pkc-3
F09E5.11	F09E5.11
F09E5.13	agt-2
F09E5.15	prdx-2
F09E5.17	bmy-1
F09E5.3	F09E5.3
F09E5.9	F09E5.9
F09E8.6	nas-14
F09F3.6	ttr-21
F09F7.4	F09F7.4
F09F7.6	F09F7.6
F09F7.7	F09F7.7
F09G2.2	F09G2.2
F09G2.9	F09G2.9
F09G8.2	crn-7
F09G8.7	F09G8.7
F10A3.17	F10A3.17
F10B5.1	rpl-10
F10B5.5	pch-2
F10B5.6	emb-27
F10B5.7	rrf-3
F10B5.8	F10B5.8
F10B5.9	F10B5.9
F10C2.2	kup-1
F10C2.4	F10C2.4
F10C5.2	F10C5.2
F10D11.1	sod-2
F10D2.12	#N/A
F10D2.8	#N/A
F10D7.2	F10D7.2
F10D7.3	F10D7.3
F10D7.5	F10D7.5
F10E7.7	rpl-33
F10E7.8	farl-11
F10E9.10	F10E9.10
F10E9.11	F10E9.11
F10E9.12	F10E9.12
F10E9.3	F10E9.3
F10E9.4	F10E9.4
F10E9.5	F10E9.5
F10E9.7	F10E9.7
F10E9.8	sas-4
F10F2.1	sel-2
F10G7.10	F10G7.10
F10G7.11	ttr-41
F10G7.2	tsn-1
F10G7.3	unc-85
F10G7.4	scc-1
F10G7.8	rpn-5
F10G7.9	F10G7.9
F10G8.3	npp-17
F10G8.5	ncs-2
F10G8.6	F10G8.6
F10G8.8	F10G8.8
F11A10.1	lex-1
F11A10.6	F11A10.6
F11A3.1	acs-14
F11A3.2	F11A3.2
F11C1.1	F11C1.1
F11C1.10	F11C1.10
F11C1.3	scav-4
F11C1.4	F11C1.4
F11C1.7	F11C1.7
F11C1.9	F11C1.9
F11D5.1	F11D5.1
F11E6.5	elo-2
F11E6.6	F11E6.6
F11E6.7	F11E6.7
F11G11.1	gst-8
F11G11.2	gst-7
F11G11.3	gst-6
F11G11.5	F11G11.5
F11G11.7	dnj-9
F11H8.1	rfl-1
F11H8.3	col-8
F12B6.1	abt-2
F12D9.2	F12D9.2
F12E12.11	F12E12.11
F12E12.7	#N/A
F12F6.1	F12F6.1
F12F6.2	F12F6.2
F12F6.6	sec-24.1
F13A7.11	F13A7.11
F13A7.12	F13A7.12
F13A7.14	F13A7.14
F13B10.2	rpl-3
F13B12.1	F13B12.1
F13B12.3	F13B12.3
F13B9.1	F13B9.1
F13C5.1	F13C5.1
F13C5.2	F13C5.2
F13C5.5	F13C5.5
F13D11.3	F13D11.3
F13D11.4	F13D11.4
F13D12.2	ldh-1
F13D12.4	alh-8
F13D12.7	gpb-1
F13E6.1	F13E6.1
F13G3.1	ztf-2
F13G3.10	F13G3.10
F13G3.11	F13G3.11
F13G3.2	srd-53
F13G3.5	ttx-7
F13G3.6	F13G3.6
F13G3.7	F13G3.7
F13G3.9	#N/A
F13H10.6	F13H10.6
F13H10.8	F13H10.8
F13H6.1	F13H6.1
F13H6.3	F13H6.3
F13H8.1	F13H8.1
F13H8.11	F13H8.11
F13H8.2	F13H8.2
F13H8.4	nmgp-1
F13H8.9	F13H8.9
F14B4.3	F14B4.3
F14B8.2	F14B8.2
F14B8.5	F14B8.5
F14B8.6	F14B8.6
F14B8.7	otpl-3
F14D12.2	unc-97
F14E5.2	F14E5.2
F14F3.2	git-1
F14F3.3	mboa-7
F14F4.3	mrp-5
F14F7.3	cyp-13A12
F14F9.4	F14F9.4
F14H8.1	obr-2
F15A2.2	tre-4
F15A4.11	tag-281
F15A4.12	tag-280
F15A8.1	F15A8.1
F15B10.1	F15B10.1
F15B10.2	drh-1
F15B9.10	F15B9.10
F15B9.4	inft-2
F15B9.5	try-10
F15C11.2	F15C11.2
F15D3.6	F15D3.6
F15D3.7	F15D3.7
F15D4.1	btf-1
F15D4.3	rmo-1
F15E11.12	F15E11.12
F15E11.15	F15E11.15
F15G9.1	F15G9.1
F15H10.9	#N/A
F16A11.2	F16A11.2
F16A11.3	ppfr-1
F16B12.6	F16B12.6
F16B4.12	nhr-117
F16B4.9	nhr-178
F16D3.4	F16D3.4
F16F9.1	F16F9.1
F16F9.5	mec-10
F16G10.6	#N/A
F16H11.1	F16H11.1
F16H11.2	#N/A
F16H11.5	nhr-45
F17A9.2	F17A9.2
F17A9.4	F17A9.4
F17B5.1	F17B5.1
F17B5.9	F17B5.9
F17C11.1	F17C11.1
F17C11.10	F17C11.10
F17C11.11	F17C11.11
F17C11.12	F17C11.12
F17C11.4	F17C11.4
F17C11.5	clec-221
F17C11.8	vps-36
F17C11.9	eef-1G
F17C8.1	acy-1
F17E5.1	lin-2
F17E5.2	F17E5.2
F17E9.10	his-32
F17E9.12	his-31
F17H10.1	F17H10.1
F17H10.3	F17H10.3
F18A1.5	rpa-1
F18A1.6	F18A1.6
F18A1.7	F18A1.7
F18A11.3	F18A11.3
F18C12.2	rme-8
F18C5.10	F18C5.10
F18C5.4	F18C5.4
F18E2.2	abcf-1
F18E2.3	scc-3
F18E3.7	ddo-2
F18E9.5	tag-279
F18G5.3	gpa-12
F18G5.6	F18G5.6
F18H3.1	F18H3.1
F18H3.3	pab-2
F18H3.4	F18H3.4
F18H3.5	cdk-4
F19B10.1	F19B10.1
F19B2.5	F19B2.5
F19B6.1	F19B6.1
F19C6.1	grk-1
F19C6.2	F19C6.2
F19F10.10	F19F10.10
F19F10.11	F19F10.11
F19F10.12	F19F10.12
F19F10.9	F19F10.9
F19G12.9	F19G12.9
F19H6.6	F19H6.6
F19H8.1	tps-2
F20B4.6	cgt-2
F20B6.2	vha-12
F20C5.4	F20C5.4
F20D1.1	F20D1.1
F20D1.10	tag-299
F20D1.2	tbc-1
F20D1.3	F20D1.3
F20D1.4	plp-2
F20D1.6	rbg-1
F20D12.4	czw-1
F20D6.11	F20D6.11
F20D6.4	srp-7
F20D6.5	F20D6.5
F20G2.2	F20G2.2
F20G4.1	smgl-1
F20H11.3	mdh-2
F20H11.4	F20H11.4
F21A10.2	F21A10.2
F21A3.2	F21A3.2
F21C10.10	F21C10.10
F21C10.8	pqn-31
F21C10.9	F21C10.9
F21C3.4	rde-2
F21C3.5	pfd-6
F21C3.6	#N/A
F21D12.1	nhr-21
F21D5.3	F21D5.3
F21D5.4	F21D5.4
F21D5.7	F21D5.7
F21E9.3	ttr-37
F21E9.4	ins-39
F21F12.1	F21F12.1
F21F3.6	F21F3.6
F21F3.7	F21F3.7
F21F8.4	F21F8.4
F21F8.7	asp-6
F21G4.1	F21G4.1
F21G4.4	F21G4.4
F21H11.2	sax-2
F21H11.3	tbx-2
F22A3.1	ets-4
F22A3.5	ceh-60
F22A3.6	ilys-5
F22B5.4	F22B5.4
F22B5.7	zyg-9
F22B5.9	fars-3
F22B7.2	#N/A
F22B7.5	dnj-10
F22B7.9	F22B7.9
F22D3.1	ceh-38
F22D3.2	F22D3.2
F22D3.4	F22D3.4
F22D3.6	F22D3.6
F22D6.1	kin-14
F22D6.2	F22D6.2
F22D6.3	nars-1
F22D6.4	nduf-6
F22D6.5	prpf-4
F22D6.6	ekl-1
F22E10.3	pgp-14
F22E12.4	egl-9
F22E5.13	F22E5.13
F22E5.21	F22E5.21
F22E5.6	F22E5.6
F22E5.9	F22E5.9
F22F1.1	hil-3
F22F4.3	klp-13
F22F7.1	F22F7.1
F22F7.5	ckb-4
F22G12.1	F22G12.1
F22G12.4	F22G12.4
F22G12.5	F22G12.5
F22G12.7	F22G12.7
F22G12.8	F22G12.8
F22H10.2	F22H10.2
F22H10.3	F22H10.3
F23A7.1	F23A7.1
F23B2.11	pcp-3
F23B2.13	rpb-12
F23B2.4	daf-10
F23B2.6	aly-2
F23C8.4	ubxn-1
F23C8.5	F23C8.5
F23C8.6	F23C8.6
F23C8.8	F23C8.8
F23C8.9	F23C8.9
F23F1.1	nfyc-1
F23F12.13	F23F12.13
F23F12.6	rpt-3
F23G4.1	F23G4.1
F23H11.1	bra-2
F23H11.3	F23H11.3
F23H11.4	F23H11.4
F23H11.5	F23H11.5
F23H11.9	crls-1
F23H12.1	snb-2
F23H12.2	tomm-20
F23H12.3	F23H12.3
F23H12.9	fipr-2
F25B3.1	ehbp-1
F25B3.6	F25B3.6
F25B4.4	F25B4.4
F25B4.6	F25B4.6
F25B4.7	F25B4.7
F25B5.1	dct-6
F25B5.2	F25B5.2
F25B5.3	F25B5.3
F25B5.4	ubq-1
F25B5.6	F25B5.6
F25B5.7	psf-1
F25C8.2	amx-3
F25C8.4	acs-12
F25D1.1	tag-93
F25D7.1	cup-2
F25D7.2	tag-353
F25D7.3	blmp-1
F25E2.4	ifd-2
F25E2.5	daf-3
F25E5.8	F25E5.8
F25E5.9	F25E5.9
F25F2.1	F25F2.1
F25G6.6	asns-1
F25H2.10	rla-0
F25H2.4	F25H2.4
F25H2.5	F25H2.5
F25H2.6	F25H2.6
F25H2.8	ubc-25
F25H2.9	pas-5
F25H5.3	pyk-1
F25H5.4	eef-2
F25H5.5	F25H5.5
F25H8.1	F25H8.1
F25H8.2	F25H8.2
F25H9.4	bath-39
F25H9.5	frm-10
F26A1.1	F26A1.1
F26A1.13	F26A1.13
F26A1.14	#N/A
F26A3.3	ego-1
F26A3.4	F26A3.4
F26A3.7	F26A3.7
F26B1.2	F26B1.2
F26B1.3	ima-2
F26D10.13	F26D10.13
F26D10.3	hsp-1
F26D10.9	atgp-1
F26D11.11	let-413
F26D11.12	F26D11.12
F26D11.13	F26D11.13
F26D11.6	F26D11.6
F26E4.1	sur-6
F26E4.6	F26E4.6
F26E4.7	F26E4.7
F26E4.9	cco-1
F26F12.3	F26F12.3
F26F2.7	F26F2.7
F26F2.8	F26F2.8
F26F4.1	cee-1
F26F4.10	rars-1
F26F4.11	rpb-8
F26F4.3	rom-1
F26F4.4	tag-340
F26F4.5	F26F4.5
F26F4.7	nhl-2
F26F4.8	F26F4.8
F26F4.9	F26F4.9
F26G1.1	F26G1.1
F26G1.3	F26G1.3
F26G1.4	ttm-2
F26G5.9	tam-1
F26H11.1	kbp-3
F26H11.2	nurf-1
F26H11.4	F26H11.4
F26H9.1	prom-1
F26H9.4	F26H9.4
F26H9.5	F26H9.5
F26H9.6	rab-5
F26H9.8	F26H9.8
F27C1.2	F27C1.2
F27C1.4	F27C1.4
F27C1.7	atp-3
F27C8.1	aat-1
F27D4.2	lsy-22
F27D4.4	F27D4.4
F27D4.6	F27D4.6
F27D4.7	F27D4.7
F27D9.1	unc-18
F27D9.5	pcca-1
F27D9.7	F27D9.7
F27D9.8	stn-2
F27E11.3	cfz-2
F27E5.1	F27E5.1
F27E5.4	phg-1
F28B3.4	F28B3.4
F28B3.5	F28B3.5
F28B3.7	him-1
F28B3.8	imb-1
F28B3.9	acl-11
F28C1.1	F28C1.1
F28C1.2	egl-10
F28C1.3	F28C1.3
F28D1.1	F28D1.1
F28D1.11	dpm-3
F28D1.7	rps-23
F28D9.1	rsr-1
F28D9.2	sri-5
F28F5.3	lim-8
F28F5.4	F28F5.4
F28F5.6	F28F5.6
F28F8.2	acs-2
F28F8.3	lsm-5
F28F8.9	F28F8.9
F28G4.1	cyp-37B1
F28H1.2	cpn-3
F28H1.3	aars-2
F28H6.1	akt-2
F28H6.4	F28H6.4
F28H6.6	F28H6.6
F29B9.1	F29B9.1
F29B9.10	F29B9.10
F29B9.11	F29B9.11
F29B9.2	F29B9.2
F29B9.6	ubc-9
F29B9.7	F29B9.7
F29C4.2	F29C4.2
F29C4.7	F29C4.7
F29C4.8	col-99
F29F11.1	sqv-4
F29F11.5	ceh-22
F29F11.6	gsp-1
F29G6.3	F29G6.3
F29G9.3	aps-1
F29G9.5	rpt-2
F30A10.10	usp-48
F30A10.8	stn-1
F30A10.9	F30A10.9
F30F8.5	F30F8.5
F30F8.8	taf-5
F30H5.1	unc-45
F31A3.3	F31A3.3
F31A3.5	F31A3.5
F31C3.1	cyn-5
F31C3.2	F31C3.2
F31C3.4	F31C3.4
F31C3.5	F31C3.5
F31D4.2	F31D4.2
F31D4.3	fkb-6
F31D4.8	F31D4.8
F31E3.3	rfc-4
F31E3.4	F31E3.4
F31E3.5	eef-1A.1
F31E8.1	F31E8.1
F31E8.4	F31E8.4
F31E9.3	F31E9.3
F31F6.8	F31F6.8
F31F7.1	F31F7.1
F31F7.2	F31F7.2
F31F7.3	#N/A
F32A11.1	F32A11.1
F32A11.2	hpr-17
F32A5.1	ada-2
F32A5.3	F32A5.3
F32A5.4	F32A5.4
F32A5.5	aqp-1
F32A5.7	lsm-4
F32A6.2	ift-81
F32A6.4	ags-3
F32A7.5	F32A7.5
F32B4.4	F32B4.4
F32B5.6	F32B5.6
F32B5.8	cpz-1
F32B6.8	tbc-3
F32D1.5	F32D1.5
F32D1.9	fipp-1
F32D8.12	F32D8.12
F32D8.13	F32D8.13
F32D8.14	F32D8.14
F32D8.5	F32D8.5
F32D8.6	emo-1
F32D8.7	F32D8.7
F32E10.1	nol-10
F32E10.2	F32E10.2
F32E10.4	ima-3
F32E10.6	F32E10.6
F33A8.3	cey-1
F33C8.1	tag-53
F33D11.11	vpr-1
F33D11.12	F33D11.12
F33D4.1	nhr-8
F33D4.5	F33D4.5
F33D4.7	F33D4.7
F33D4.8	F33D4.8
F33E11.6	F33E11.6
F33E2.2	dlk-1
F33G12.2	F33G12.2
F33G12.5	F33G12.5
F33G12.7	F33G12.7
F33H1.1	daf-19
F33H1.3	F33H1.3
F33H1.4	F33H1.4
F33H2.1	dog-1
F33H2.2	F33H2.2
F33H2.3	F33H2.3
F33H2.6	F33H2.6
F33H2.8	F33H2.8
F34D10.2	F34D10.2
F34D10.3	F34D10.3
F35A5.4	F35A5.4
F35A5.8	erp-1
F35B12.2	dhs-20
F35B12.3	F35B12.3
F35B12.4	F35B12.4
F35B12.5	sas-5
F35B12.6	tag-290
F35B3.5	pqn-34
F35C11.4	F35C11.4
F35C5.12	F35C5.12
F35C5.5	clec-62
F35C5.6	clec-63
F35C5.8	clec-65
F35C8.1	#N/A
F35C8.2	F35C8.2
F35C8.4	syx-3
F35C8.5	F35C8.5
F35C8.7	chtl-1
F35C8.8	F35C8.8
F35D11.2	pqn-35
F35D11.4	F35D11.4
F35D11.5	F35D11.5
F35E12.9	F35E12.9
F35F10.1	F35F10.1
F35F10.12	arrd-19
F35F11.1	F35F11.1
F35G12.1	mlcd-1
F35G12.3	sel-5
F35G12.4	F35G12.4
F35G12.7	F35G12.7
F35G12.8	smc-4
F35G2.1	F35G2.1
F35G2.2	F35G2.2
F35G2.3	#N/A
F35H10.4	vha-5
F35H12.2	tbc-11
F35H12.4	F35H12.4
F36A2.1	cids-2
F36A2.6	rps-15
F36A2.7	F36A2.7
F36A2.8	phip-1
F36A2.9	F36A2.9
F36A4.7	ama-1
F36D1.1	F36D1.1
F36D3.1	F36D3.1
F36D3.2	nhr-54
F36D4.2	F36D4.2
F36D4.4	F36D4.4
F36D4.5	F36D4.5
F36F2.1	F36F2.1
F36F2.3	tag-214
F36F2.4	syx-7
F36G3.1	F36G3.1
F36H1.1	fkb-1
F36H1.2	tag-144
F36H1.9	hrg-5
F36H2.2	F36H2.2
F36H9.3	dhs-13
F37B1.1	gst-24
F37B1.8	gst-19
F37B12.2	gcs-1
F37C12.1	F37C12.1
F37C12.10	F37C12.10
F37C12.11	rps-21
F37C12.13	exos-9
F37C12.2	epg-4
F37C12.21	F37C12.21
F37C12.3	F37C12.3
F37C12.4	rpl-36
F37C12.7	acs-4
F37C12.9	rps-14
F37C4.5	F37C4.5
F37E3.1	ncbp-1
F37F2.2	F37F2.2
F37H8.6	F37H8.6
F38A1.1	clec-170
F38A1.13	#N/A
F38A5.13	dnj-11
F38A5.2	F38A5.2
F38A5.7	F38A5.7
F38B2.1	ifa-1
F38B6.4	F38B6.4
F38B7.3	F38B7.3
F38E11.1	hsp-12.3
F38E11.9	F38E11.9
F38E9.2	nas-39
F38E9.5	F38E9.5
F38H4.10	F38H4.10
F38H4.3	F38H4.3
F38H4.7	tag-30
F38H4.8	ech-2
F39B1.1	piki-1
F39B2.1	F39B2.1
F39B2.10	dnj-12
F39B2.11	mtx-1
F39B2.2	uev-1
F39B2.3	F39B2.3
F39B2.4	sur-2
F39B2.6	rps-26
F39D8.2	psa-3
F39E9.2	btb-16
F39G3.1	ugt-61
F39G3.3	F39G3.3
F39G3.7	prx-6
F39H11.1	F39H11.1
F39H11.5	pbs-7
F40A3.3	F40A3.3
F40B5.2	F40B5.2
F40E10.6	F40E10.6
F40E3.5	F40E3.5
F40F11.1	rps-11
F40F11.2	F40F11.2
F40F11.3	F40F11.3
F40F11.4	F40F11.4
F40F12.5	cyld-1
F40F12.7	F40F12.7
F40F12.9	F40F12.9
F40F4.7	F40F4.7
F40F8.1	F40F8.1
F40F8.10	rps-9
F40F8.11	F40F8.11
F40F8.5	F40F8.5
F40F8.9	lsm-1
F40F9.1	xbx-6
F40F9.10	F40F9.10
F40F9.2	tag-120
F40F9.3	F40F9.3
F40F9.5	F40F9.5
F40F9.6	aagr-3
F40F9.7	F40F9.7
F40F9.8	#N/A
F40G9.11	mxl-2
F40G9.3	ubc-20
F40H3.1	F40H3.1
F41B4.4	glr-6
F41B5.10	nhr-183
F41B5.2	cyp-33C7
F41B5.3	cyp-33C5
F41B5.6	F41B5.6
F41B5.7	cyp-33C6
F41B5.9	nhr-182
F41C3.8	F41C3.8
F41C6.7	F41C6.7
F41E6.10	#N/A
F41E6.13	atg-18
F41E6.15	F41E6.15
F41E6.5	F41E6.5
F41E6.9	F41E6.9
F41G3.14	exos-8
F41G4.2	cas-1
F41H10.3	F41H10.3
F41H10.4	F41H10.4
F41H10.5	F41H10.5
F41H10.6	hdac-6
F41H10.7	elo-5
F41H10.8	elo-6
F42A10.1	abcf-3
F42A10.2	nfm-1
F42A10.3	F42A10.3
F42A10.4	efk-1
F42A10.5	F42A10.5
F42A10.6	F42A10.6
F42A10.7	F42A10.7
F42A10.9	F42A10.9
F42A6.7	hrp-1
F42A8.2	sdhb-1
F42A8.3	F42A8.3
F42A9.11	F42A9.11
F42A9.2	lin-49
F42A9.5	cyp-33E2
F42A9.8	F42A9.8
F42C5.8	rps-8
F42C5.9	F42C5.9
F42F12.3	F42F12.3
F42G2.2	F42G2.2
F42G2.4	fbxa-182
F42G2.8	fbxa-4
F42G4.6	F42G4.6
F42G8.11	sph-1
F42G8.12	isp-1
F42G8.4	pmk-3
F42G8.5	islo-1
F42G9.1	F42G9.1
F42G9.6	F42G9.6
F42G9.7	snt-2
F42H10.2	F42H10.2
F42H10.3	F42H10.3
F42H10.7	ess-2
F42H11.2	lem-3
F43C11.6	F43C11.6
F43C11.7	F43C11.7
F43C9.1	F43C9.1
F43D2.1	F43D2.1
F43D9.3	F43D9.3
F43D9.4	sip-1
[truncated: 2,946 more rows]

## Sheet: OP37<0.01
gene	baseMean	log2FoldChange	lfcSE	stat	pvalue	padj	Gene Public Name
T07D10.4	26.1613	-7.70769	1.31842	-5.84614	5.03124e-09	6.89834e-07	clec-15
F42F12.10	68.384	-7.31608	1.03867	-7.04369	1.87212e-12	6.66162e-10	nspc-12
T27E4.8	116.79	-6.62164	0.869422	-7.61614	2.61375e-14	1.5024e-11	hsp-16.1
F54D1.2	9.9968	-6.33203	1.71468	-3.69284	0.000221761	0.00470101	col-126
C42D8.2	79.2873	-6.28194	1.77366	-3.5418	0.000397403	0.00745192	vit-2
T27E4.9	34.3524	-5.80445	1.25315	-4.63191	3.62314e-06	0.000178899	hsp-16.49
F15E11.1	151.513	-5.72434	0.725735	-7.88765	3.07918e-15	2.53419e-12	F15E11.1
B0035.9	5.16342	-5.36419	1.37986	-3.88748	0.000101289	0.00257882	his-46
Y73B3B.1	9.0498	-5.17793	1.29562	-3.99648	6.429e-05	0.00184772	Y73B3B.1
F21H12.4	31.5671	-5.17149	0.814351	-6.35044	2.14695e-10	4.66669e-08	ptc-2
F42F12.6	29.6746	-5.05869	0.969401	-5.21837	1.80508e-07	1.39777e-05	nspc-13
Y19D2B.1	21.3388	-4.94655	1.06322	-4.65245	3.28022e-06	0.000165618	Y19D2B.1
Y105C5A.12	33.3324	-4.92355	0.765115	-6.43504	1.23437e-10	2.88244e-08	Y105C5A.12
D1025.6	179.045	-4.8782	0.558853	-8.72896	2.57029e-18	2.95484e-15	nspc-16
D1025.9	162.125	-4.76495	0.525248	-9.07181	1.17052e-19	1.59032e-16	nspc-19
Y38C1AB.5	24.3648	-4.76047	1.03865	-4.58331	4.57671e-06	0.000219932	Y38C1AB.5
F33H1.6	6.98183	-4.75734	1.29503	-3.67354	0.000239211	0.00498606	F33H1.6
K09F5.2	39.7174	-4.49223	0.915552	-4.90658	9.26795e-07	5.65345e-05	vit-1
F08G2.1	9.24706	-4.4238	1.16073	-3.81122	0.000138281	0.0032545	his-44
Y19D10B.7	110.606	-4.41666	0.561368	-7.86767	3.61301e-15	2.69982e-12	Y19D10B.7
C25F9.1	142.355	-4.35293	0.600156	-7.253	4.07639e-13	1.84611e-10	srw-85
F58E6.4	17.5579	-4.19936	1.13272	-3.70731	0.00020947	0.00452389	F58E6.4
C30F2.4	23.4081	-3.98591	0.760631	-5.24027	1.60344e-07	1.25463e-05	C30F2.4
Y34D9A.11	611.204	-3.97799	0.376377	-10.5692	4.1413e-26	1.23784e-22	spp-23
F56H9.6	20.7113	-3.658	0.75116	-4.8698	1.11712e-06	6.59897e-05	F56H9.6
F07C4.6	29.7094	-3.60959	0.693467	-5.20514	1.9385e-07	1.48569e-05	F07C4.6
C24F3.6	30.2767	-3.57996	0.911476	-3.92766	8.57781e-05	0.00230567	col-124
K02E2.1	13.2393	-3.52117	0.813197	-4.33003	1.49086e-05	0.00056988	K02E2.1
W03B1.3	15.2268	-3.5008	0.79561	-4.40015	1.08178e-05	0.000443877	W03B1.3
D1025.7	129.222	-3.49514	0.442922	-7.89109	2.99547e-15	2.53419e-12	nspc-18
Y47D7A.12	70.6749	-3.4272	0.877735	-3.9046	9.43815e-05	0.00248407	Y47D7A.12
T07D10.1	9.63	-3.42332	0.884989	-3.8682	0.00010964	0.00273552	T07D10.1
Y46H3A.1	9.61474	-3.41557	0.947546	-3.60465	0.000312577	0.0062038	srt-42
F47E1.1	9.6614	-3.38633	0.870911	-3.88826	0.000100965	0.00257496	F47E1.1
D2005.1	26.2138	-3.27097	0.557147	-5.87093	4.3337e-09	6.1683e-07	D2005.1
T10D4.15	8.83222	-3.2305	0.876501	-3.68568	0.000228093	0.0047961	T10D4.15
K09C6.9	160.176	-3.12931	0.418735	-7.47326	7.82305e-14	3.77147e-11	K09C6.9
W01C9.2	28.1675	-3.09745	0.811906	-3.81503	0.000136166	0.00324044	W01C9.2
W05B2.2	50.6434	-3.039	0.657799	-4.61995	3.83832e-06	0.000187463	W05B2.2
F47C12.2	43.2329	-2.98589	0.536217	-5.56843	2.57045e-08	2.63119e-06	clec-78
T24F1.5	144.408	-2.96887	0.579866	-5.11993	3.05656e-07	2.15473e-05	T24F1.5
C25G6.4	14.2249	-2.95927	0.709954	-4.16826	3.06935e-05	0.00103314	C25G6.4
Y60C6A.1	34.0691	-2.93124	0.54817	-5.34733	8.9262e-08	7.7111e-06	Y60C6A.1
R11D1.12	42.9602	-2.89895	0.563448	-5.14501	2.67507e-07	1.92206e-05	R11D1.12
T13F3.7	17.9824	-2.89466	0.664234	-4.35789	1.31321e-05	0.000513769	T13F3.7
T12E12.6	125.022	-2.82522	0.464916	-6.07683	1.2258e-09	2.13019e-07	T12E12.6
C07A12.2	29.0899	-2.80836	0.510413	-5.50214	3.75214e-08	3.5946e-06	C07A12.2
C05G5.7	376.689	-2.7191	0.361446	-7.52284	5.36002e-14	2.67019e-11	C05G5.7
EGAP4.1	224.422	-2.71164	0.534517	-5.07306	3.91459e-07	2.62348e-05	EGAP4.1
Y49G5A.1	43.8338	-2.67117	0.679824	-3.92921	8.5224e-05	0.00229664	Y49G5A.1
T21D12.2	2087.77	-2.63736	0.346924	-7.60211	2.9133e-14	1.61257e-11	dpy-9
R06F6.7	253.982	-2.63306	0.412125	-6.38898	1.66991e-10	3.73515e-08	R06F6.7
W04G3.3	3042.5	-2.60568	0.214828	-12.1292	7.39804e-34	5.52818e-30	lpr-4
F14F3.4	26.8876	-2.60544	0.537553	-4.84685	1.25437e-06	7.35159e-05	F14F3.4
W04G3.8	9816.39	-2.58964	0.230046	-11.2571	2.13781e-29	7.98738e-26	lpr-3
C48D5.3	59.1236	-2.5369	0.540934	-4.68985	2.73408e-06	0.000141878	C48D5.3
Y45F10D.2	52.3224	-2.5309	0.713572	-3.54681	0.000389933	0.00734873	Y45F10D.2
D1025.8	324.369	-2.51773	0.369772	-6.80888	9.83626e-12	3.12772e-09	nspc-17
Y54G2A.37	411.093	-2.50993	0.363315	-6.9084	4.90161e-12	1.62788e-09	Y54G2A.37
Y18H1A.13	445.461	-2.49157	0.353453	-7.04921	1.79936e-12	6.5589e-10	col-46
W03D2.1	129.155	-2.48491	0.544464	-4.56395	5.01994e-06	0.00023447	pqn-75
T17H7.1	1311.04	-2.48194	0.532517	-4.66077	3.15033e-06	0.000160688	T17H7.1
C02G6.3	32.2652	-2.45808	0.636805	-3.86002	0.000113378	0.00279787	C02G6.3
EGAP7.1	2404.39	-2.44654	0.345615	-7.07882	1.45392e-12	5.4322e-10	dpy-3
C14B9.1	1336.39	-2.4349	0.360786	-6.74887	1.48999e-11	4.36626e-09	hsp-12.2
F42F12.7	226.926	-2.41692	0.36819	-6.56434	5.22636e-11	1.32386e-08	nspc-14
C27C7.4	29.1758	-2.41107	0.522601	-4.61359	3.9577e-06	0.000192664	nhr-73
B0294.1	545.443	-2.39967	0.423421	-5.66732	1.45045e-08	1.68038e-06	B0294.1
C15C8.2	96.11	-2.38849	0.584919	-4.08345	4.43716e-05	0.0014023	cky-1
K02E2.4	92.6615	-2.38537	0.410929	-5.80481	6.4438e-09	8.59844e-07	ins-35
T14B4.7	2604.59	-2.35433	0.229528	-10.2572	1.09803e-24	2.73502e-21	dpy-10
T13C5.7	27.3699	-2.34149	0.496862	-4.71256	2.44628e-06	0.000128279	T13C5.7
F17B5.6	22.9521	-2.33455	0.55063	-4.23978	2.23743e-05	0.000803806	F17B5.6
C30H6.10	44.4265	-2.33077	0.447651	-5.20667	1.9226e-07	1.48109e-05	C30H6.10
C49G7.4	124.677	-2.3259	0.624037	-3.72719	0.00019363	0.0042431	phat-3
Y53F4B.20	37.6715	-2.32512	0.531045	-4.37839	1.19558e-05	0.000481617	Y53F4B.20
R09B5.6	766.249	-2.32229	0.383218	-6.05997	1.36151e-09	2.31224e-07	hacd-1
F21F12.1	17.7108	-2.32221	0.552371	-4.20407	2.62153e-05	0.000904822	F21F12.1
M03A1.7	5147.36	-2.32203	0.252601	-9.19249	3.83852e-20	6.37408e-17	dao-2
F42F12.1	34.3992	-2.31694	0.502788	-4.60819	4.06191e-06	0.000196457	nspc-9
B0024.1	2882.55	-2.30748	0.615856	-3.74679	0.000179115	0.0040013	col-149
C54C6.1	41.9352	-2.3034	0.530275	-4.34379	1.40044e-05	0.00054504	rpl-37
ZC334.2	142.111	-2.29384	0.393865	-5.82392	5.74817e-09	7.80968e-07	ins-30
Y37A1B.7	445.741	-2.28269	0.420551	-5.42785	5.70368e-08	5.16615e-06	Y37A1B.7
K07D4.5	17.9269	-2.28152	0.554689	-4.11314	3.90309e-05	0.00125986	K07D4.5
F26A1.15	54.0458	-2.27478	0.373825	-6.08515	1.16385e-09	2.07068e-07	acbp-7
C54G6.5	1490.48	-2.26951	0.478144	-4.7465	2.06967e-06	0.000112477	spp-17
C54C8.4	51.2044	-2.26348	0.416292	-5.43723	5.41151e-08	4.96166e-06	C54C8.4
ZK652.5	63.1024	-2.24664	0.478054	-4.69955	2.60731e-06	0.000135771	ceh-23
C14B9.10	1229.97	-2.24564	0.467292	-4.80564	1.54257e-06	8.73247e-05	C14B9.10
C31H2.2	4839.7	-2.24334	0.36538	-6.13974	8.26558e-10	1.60427e-07	dpy-8
T14B4.6	2426.72	-2.24256	0.257917	-8.69486	3.47259e-18	3.70699e-15	dpy-2
W01A8.3	19.9754	-2.23628	0.553217	-4.04232	5.2925e-05	0.00161421	cutl-6
F13C5.5	516.12	-2.2277	0.367978	-6.05389	1.41392e-09	2.34789e-07	F13C5.5
F12E12.11	32.9789	-2.22673	0.51766	-4.30153	1.69622e-05	0.000635338	F12E12.11
C36H8.2	237.701	-2.21827	0.30242	-7.33508	2.21582e-13	1.03486e-10	inx-6
F31F4.7	26.7406	-2.21609	0.540609	-4.09925	4.14498e-05	0.00131569	ugt-42
F08A8.2	2377.45	-2.21453	0.505903	-4.37739	1.2011e-05	0.00048254	F08A8.2
Y18H1A.12	105.445	-2.1899	0.421873	-5.19089	2.09291e-07	1.56393e-05	col-47
M03B6.3	965.024	-2.18449	0.281235	-7.7675	8.00528e-15	5.43813e-12	M03B6.3
W01F3.3	22045	-2.18423	0.282661	-7.72736	1.09799e-14	7.13453e-12	mlt-11
K02D3.1	42.5152	-2.17826	0.498065	-4.37345	1.22298e-05	0.0004874	K02D3.1
C34F6.1	1106.02	-2.17321	0.613039	-3.54498	0.00039265	0.00738133	C34F6.1
Y87G2A.19	445.032	-2.17044	0.320873	-6.76418	1.34067e-11	4.00727e-09	Y87G2A.19
ZC84.6	189.192	-2.16963	0.562091	-3.85993	0.000113422	0.00279787	ZC84.6
T08G5.10	769.686	-2.15188	0.372304	-5.7799	7.47462e-09	9.79897e-07	mtl-2
F28G4.2	22.5138	-2.14227	0.586833	-3.65056	0.000261667	0.00534238	F28G4.2
F46C8.6	2221.92	-2.12268	0.232252	-9.13954	6.27173e-20	9.37311e-17	dpy-7
ZC15.10	18.7386	-2.11747	0.5675	-3.73122	0.000190552	0.00419411	ZC15.10
F25D1.5	51.9919	-2.11697	0.499745	-4.23611	2.27428e-05	0.000813135	F25D1.5
W03B1.7	26.5565	-2.10705	0.539281	-3.90715	9.33921e-05	0.00247466	oac-51
Y54G2A.39	123.093	-2.103	0.299375	-7.02461	2.14661e-12	7.46071e-10	clec-80
F15A4.6	687.605	-2.08787	0.365699	-5.70924	1.1348e-08	1.35676e-06	F15A4.6
T01C4.1	79.4236	-2.08599	0.528977	-3.94344	8.03219e-05	0.00219053	T01C4.1
K02E10.4	853.321	-2.0843	0.378565	-5.5058	3.67502e-08	3.54343e-06	K02E10.4
F52E4.6	2479.33	-2.08165	0.360793	-5.76964	7.94426e-09	1.01476e-06	wrt-2
Y41G9A.2	17.3257	-2.08006	0.556021	-3.74098	0.000183305	0.00408271	Y41G9A.2
F54D8.1	73.963	-2.07846	0.561651	-3.70062	0.000215075	0.00460501	dpy-17
T22F7.3	247.647	-2.0722	0.600308	-3.45189	0.00055667	0.00964013	T22F7.3
T03F1.11	416.363	-2.06296	0.260737	-7.91201	2.53261e-15	2.52332e-12	T03F1.11
Y80D3A.10	164.99	-2.05909	0.452295	-4.55253	5.30046e-06	0.00024151	nlp-42
F15D4.4	74.7833	-2.05184	0.448751	-4.57232	4.82352e-06	0.000230312	F15D4.4
C34G6.6	12034.8	-2.04517	0.259473	-7.882	3.22178e-15	2.53419e-12	noah-1
Y71D11A.1	6372.26	-2.04422	0.393001	-5.20156	1.9762e-07	1.50685e-05	cdh-12
F09F9.2	775.618	-2.04033	0.539107	-3.78465	0.000153928	0.0035554	F09F9.2
K10D3.4	2707	-2.03631	0.445738	-4.5684	4.91463e-06	0.000233172	K10D3.4
F44E5.4	714.205	-2.02348	0.479134	-4.2232	2.40862e-05	0.00085099	F44E5.4
F20A1.4	48.2978	-2.02328	0.458634	-4.41154	1.02637e-05	0.000423734	F20A1.4
F32D1.11	150.03	-2.01991	0.518132	-3.89845	9.68109e-05	0.00251394	F32D1.11
F52B11.3	9882.1	-2.01366	0.263976	-7.62819	2.38067e-14	1.42316e-11	noah-2
F33E2.5	34.1602	-2.00974	0.524503	-3.83171	0.000127256	0.00305271	F33E2.5
C53B7.5	34.5582	-2.00428	0.512851	-3.90812	9.30187e-05	0.00246921	odr-10
F42F12.9	52.6886	-2.004	0.538745	-3.71976	0.000199411	0.00435065	nspc-10
W09C5.4	230.633	-1.99874	0.49904	-4.00516	6.19746e-05	0.00180177	ins-33
W04G3.1	2239.94	-1.99619	0.332987	-5.99481	2.03719e-09	3.23891e-07	lpr-6
T24E12.9	19.8449	-1.99574	0.549485	-3.63202	0.000281206	0.00568691	T24E12.9
R02C2.7	22.7867	-1.99337	0.576267	-3.45911	0.000541966	0.00945121	R02C2.7
Y46H3B.1	36.4467	-1.99113	0.487617	-4.0834	4.4382e-05	0.0014023	clec-205
C54D10.3	843.086	-1.98974	0.3018	-6.59291	4.31282e-11	1.15098e-08	C54D10.3
F02E11.2	55.3484	-1.98006	0.545817	-3.62769	0.000285965	0.00575976	F02E11.2
D1025.4	516.886	-1.9757	0.336948	-5.8635	4.53201e-09	6.38971e-07	nspc-20
F54B11.9	125.158	-1.96587	0.43074	-4.56393	5.02043e-06	0.00023447	F54B11.9
T27A10.6	2314.67	-1.96354	0.272501	-7.20564	5.77727e-13	2.53945e-10	T27A10.6
F47C12.1	288.635	-1.9578	0.471	-4.15668	3.22905e-05	0.00107232	F47C12.1
Y41G9A.10	95.6497	-1.95327	0.517649	-3.77335	0.000161072	0.0036864	Y41G9A.10
F13D12.9	564.606	-1.95178	0.258009	-7.56478	3.88531e-14	2.07379e-11	F13D12.9
R148.7	76.3253	-1.94834	0.427787	-4.55446	5.25193e-06	0.000241508	R148.7
F37B1.1	145.46	-1.94251	0.481822	-4.03159	5.53999e-05	0.00167263	gst-24
C39E9.4	113.872	-1.93715	0.544934	-3.55483	0.000378219	0.00720062	scl-6
C15C8.3	2446.35	-1.92538	0.406654	-4.73468	2.194e-06	0.000118373	C15C8.3
F37B1.2	50.0291	-1.92162	0.41548	-4.62506	3.74488e-06	0.000183499	gst-12
C25G6.3	87.3382	-1.91493	0.279771	-6.84464	7.66691e-12	2.49091e-09	C25G6.3
F47F6.1	8183.59	-1.91367	0.423208	-4.52182	6.13099e-06	0.000267136	lin-42
C18A11.2	23.5408	-1.9124	0.518638	-3.68736	0.000226594	0.00477638	C18A11.2
Y57G11B.97	29.7857	-1.90716	0.531192	-3.59034	0.000330242	0.0064855	Y57G11B.97
ZC334.11	619.905	-1.89377	0.386721	-4.897	9.73123e-07	5.88799e-05	ins-27
M02E1.2	65.626	-1.88799	0.406903	-4.6399	3.4858e-06	0.000174021	M02E1.2
M03B6.1	24.5974	-1.88683	0.534029	-3.53321	0.00041055	0.0076125	M03B6.1
K08B12.1	868.087	-1.88336	0.362434	-5.19642	2.03159e-07	1.52574e-05	K08B12.1
F12F6.9	588.01	-1.88309	0.286358	-6.57601	4.83244e-11	1.26703e-08	col-128
W04G3.2	3810.81	-1.88177	0.249298	-7.54829	4.41015e-14	2.27275e-11	lpr-5
C24A1.2	156.349	-1.88166	0.457433	-4.11351	3.89683e-05	0.00125986	C24A1.2
Y40B10A.7	54.0053	-1.87881	0.390599	-4.81008	1.50869e-06	8.60595e-05	Y40B10A.7
T13C5.3	20.9504	-1.87459	0.50288	-3.72772	0.000193222	0.00424039	T13C5.3
Y38E10A.24	971.572	-1.86972	0.513104	-3.64395	0.000268489	0.00546672	Y38E10A.24
F53B3.2	127.939	-1.86921	0.409902	-4.56013	5.11216e-06	0.000236536	F53B3.2
M02B7.6	65.532	-1.86672	0.412062	-4.53019	5.89315e-06	0.000262905	cal-3
Y67D8A.3	155.751	-1.86182	0.376737	-4.94197	7.73391e-07	4.79599e-05	Y67D8A.3
T03G6.1	1093.33	-1.86105	0.357856	-5.20057	1.98678e-07	1.50723e-05	T03G6.1
R06C1.4	6205.27	-1.86016	0.292943	-6.3499	2.15458e-10	4.66669e-08	R06C1.4
F08G12.8	32.2276	-1.85484	0.526951	-3.51995	0.00043162	0.00792109	F08G12.8
F19H8.4	771.389	-1.84739	0.295253	-6.25695	3.92571e-10	8.14857e-08	mltn-9
Y54E2A.1	98.8698	-1.84386	0.428612	-4.30193	1.69318e-05	0.000635338	Y54E2A.1
F17A9.3	304.064	-1.82187	0.380685	-4.78577	1.7033e-06	9.49842e-05	F17A9.3
C44H4.2	933.412	-1.81865	0.299133	-6.07975	1.20372e-09	2.11643e-07	sym-5
F23B2.5	1203.72	-1.81761	0.254539	-7.14079	9.27984e-13	3.7483e-10	flp-1
ZC334.3	49.4799	-1.81343	0.451497	-4.01648	5.90734e-05	0.00175169	ins-24
F29B9.11	3809.72	-1.81165	0.509578	-3.5552	0.000377694	0.00719979	F29B9.11
M6.4	30.7704	-1.80767	0.481326	-3.7556	0.000172926	0.00389911	M6.4
Y73E7A.8	1408.79	-1.78954	0.359734	-4.9746	6.53814e-07	4.17575e-05	Y73E7A.8
C27C7.3	94.6324	-1.789	0.320463	-5.58256	2.37006e-08	2.5121e-06	nhr-74
F11C7.3	712.786	-1.78033	0.275133	-6.4708	9.74883e-11	2.31264e-08	vap-1
Y38F2AR.9	2546.22	-1.77226	0.315945	-5.60938	2.03054e-08	2.19901e-06	Y38F2AR.9
ZC449.1	240.536	-1.76957	0.459647	-3.84985	0.000118191	0.00289281	ZC449.1
F36H12.1	208.917	-1.7673	0.267631	-6.60349	4.01581e-11	1.0912e-08	nlp-47
ZK1290.8	2132.56	-1.76593	0.30642	-5.76309	8.25867e-09	1.04598e-06	wrt-10
Y113G7A.16	29.9279	-1.76394	0.505224	-3.49139	0.00048051	0.00863128	Y113G7A.16
T26C5.2	1033.63	-1.75824	0.372009	-4.72633	2.2861e-06	0.00012202	T26C5.2
F48G7.4	56.3266	-1.75739	0.334021	-5.26131	1.43031e-07	1.1431e-05	F48G7.4
T18D3.4	11382.3	-1.75688	0.320122	-5.48816	4.06153e-08	3.83423e-06	myo-2
C06G3.11	288.362	-1.75635	0.455983	-3.85179	0.000117256	0.0028775	tin-9.1
F36H1.5	54.7407	-1.75176	0.38688	-4.52793	5.95651e-06	0.00026462	hrg-4
M04G7.1	313.757	-1.75019	0.26055	-6.71728	1.85152e-11	5.12426e-09	M04G7.1
F20D1.4	29.4848	-1.74282	0.416083	-4.18862	2.80652e-05	0.000957613	plp-2
R193.2	4970.92	-1.73787	0.372043	-4.67115	2.99523e-06	0.000154358	R193.2
H14E04.1	111.984	-1.73673	0.294572	-5.89578	3.72914e-09	5.41087e-07	H14E04.1
Y105E8A.13	217.961	-1.73278	0.338197	-5.12358	2.99785e-07	2.12336e-05	Y105E8A.13
Y116A8C.3	73.0301	-1.72967	0.293188	-5.89951	3.64586e-09	5.3419e-07	Y116A8C.3
C45G9.11	24.464	-1.72348	0.45454	-3.79169	0.000149624	0.00347766	C45G9.11
ZK1290.12	1200.06	-1.72155	0.450695	-3.81977	0.000133575	0.00318385	wrt-1
B0495.6	197.343	-1.72123	0.436602	-3.94234	8.06908e-05	0.00219658	B0495.6
Y57G11C.45	80.8734	-1.70479	0.299035	-5.70098	1.19123e-08	1.41293e-06	Y57G11C.45
T20F5.4	387.713	-1.68834	0.427068	-3.95333	7.70712e-05	0.00211345	T20F5.4
R09B5.8	271.08	-1.68694	0.471718	-3.57617	0.000348664	0.00675848	cnc-3
K08F8.2	557.575	-1.67408	0.370811	-4.51463	6.34272e-06	0.000275558	atf-2
Y55F3AM.14	552.239	-1.66572	0.368331	-4.52234	6.11611e-06	0.000267136	Y55F3AM.14
H42K12.3	4560.63	-1.65164	0.477706	-3.45744	0.00054534	0.00948756	H42K12.3
K07C5.9	67.1594	-1.6475	0.407484	-4.04312	5.27452e-05	0.00161202	K07C5.9
R06C7.10	9167.41	-1.64356	0.326566	-5.03287	4.83201e-07	3.1673e-05	let-75
M163.3	3879.42	-1.64207	0.302959	-5.42011	5.95624e-08	5.3303e-06	his-24
Y105E8A.4	639.869	-1.64056	0.315559	-5.1989	2.00472e-07	1.51316e-05	ech-7
ZC449.2	127.598	-1.63678	0.384856	-4.25298	2.10948e-05	0.000772702	ZC449.2
C49A1.4	60.7323	-1.63517	0.411534	-3.97336	7.08669e-05	0.00198334	eya-1
F53F4.5	3405.07	-1.63263	0.262107	-6.2289	4.69729e-10	9.61658e-08	fmo-4
R09E12.9	53.5536	-1.63138	0.350778	-4.65074	3.3075e-06	0.000166433	R09E12.9
Y55F3BR.2	491.39	-1.62439	0.436869	-3.71826	0.0002006	0.00437021	Y55F3BR.2
Y71G12B.6	880.712	-1.62294	0.336401	-4.82442	1.40409e-06	8.13335e-05	Y71G12B.6
K11D12.1	44.8688	-1.62057	0.407928	-3.9727	7.10633e-05	0.00198512	cwp-4
Y39A3CR.4	1420.9	-1.61997	0.347703	-4.65908	3.1763e-06	0.000160914	ddp-1
C49C3.13	111.956	-1.6194	0.320679	-5.04991	4.4202e-07	2.92301e-05	clec-198
F16H6.1	351.959	-1.61065	0.384721	-4.18654	2.83236e-05	0.000964228	clec-42
C45G7.5	2696.57	-1.60993	0.280795	-5.73349	9.83847e-09	1.21517e-06	cdh-10
C50F2.6	1252.42	-1.60878	0.404665	-3.97559	7.02064e-05	0.00197596	fkb-5
C31C9.1	2354.37	-1.607	0.334091	-4.81008	1.50871e-06	8.60595e-05	tag-10
C44H4.3	7490.93	-1.60547	0.400145	-4.01223	6.01482e-05	0.00177206	sym-1
T22B11.3	51.449	-1.60185	0.414449	-3.86501	0.000111085	0.00276695	T22B11.3
F23F12.9	61.494	-1.6016	0.345792	-4.63168	3.62707e-06	0.000178899	F23F12.9
T08G2.2	75.2202	-1.59147	0.311133	-5.11507	3.13617e-07	2.18295e-05	T08G2.2
C37H5.1	223.096	-1.58839	0.256848	-6.18418	6.24252e-10	1.24393e-07	nex-4
F48F5.6	95.9753	-1.5882	0.407497	-3.89745	9.72108e-05	0.00251394	F48F5.6
R07E3.6	2626.43	-1.58682	0.406641	-3.90227	9.52959e-05	0.00249422	R07E3.6
F53A3.7	56.2546	-1.58154	0.334529	-4.72766	2.27127e-06	0.000121663	F53A3.7
T21B6.3	5611.86	-1.57773	0.365374	-4.31811	1.5737e-05	0.000599974	T21B6.3
R57.2	343.834	-1.57731	0.262655	-6.00524	1.91046e-09	3.10345e-07	R57.2
F32D8.6	3939.24	-1.57253	0.300828	-5.22734	1.71962e-07	1.33853e-05	emo-1
Y38H6C.16	138.161	-1.57243	0.304428	-5.16521	2.40173e-07	1.76676e-05	Y38H6C.16
Y37D8A.4	143.007	-1.57202	0.395091	-3.97887	6.92443e-05	0.00195995	Y37D8A.4
F35C5.7	37.7079	-1.57166	0.407835	-3.85367	0.000116361	0.00286493	clec-64
C11H1.5	480.85	-1.57088	0.361754	-4.34242	1.40925e-05	0.000547045	C11H1.5
Y38H6C.20	38.4992	-1.56818	0.377311	-4.15619	3.23598e-05	0.00107232	Y38H6C.20
T09B9.3	45.0908	-1.56411	0.400552	-3.9049	9.42661e-05	0.00248407	T09B9.3
D1005.1	3079.54	-1.56292	0.25684	-6.08517	1.16368e-09	2.07068e-07	D1005.1
F17E9.10	99.8322	-1.56273	0.422143	-3.70191	0.000213985	0.00458823	his-32
Y51F10.7	1789.35	-1.56045	0.390623	-3.99478	6.47531e-05	0.00185746	Y51F10.7
C45B11.6	35.5723	-1.55721	0.438627	-3.55018	0.000384962	0.00729328	C45B11.6
B0412.2	880.861	-1.55682	0.41206	-3.77814	0.000158007	0.00362736	daf-7
F22E5.3	76.6134	-1.55619	0.313272	-4.96752	6.78157e-07	4.31279e-05	gcy-21
T26C12.4	46.7113	-1.55259	0.35655	-4.35446	1.33393e-05	0.000520512	gcy-23
C52D10.11	431.537	-1.53715	0.329741	-4.66168	3.13637e-06	0.000160524	flp-17
C09F9.2	3297	-1.52366	0.35421	-4.30158	1.69586e-05	0.000635338	C09F9.2
B0310.3	116.003	-1.52063	0.338119	-4.49733	6.88125e-06	0.000295518	B0310.3
C40H1.6	357.276	-1.5179	0.341191	-4.44882	8.63437e-06	0.000362474	C40H1.6
Y38H8A.1	248.254	-1.51055	0.314134	-4.80864	1.51961e-06	8.63521e-05	Y38H8A.1
ZK593.2	24.3715	-1.50156	0.424288	-3.53901	0.000401626	0.00750287	ZK593.2
ZK75.1	88.5374	-1.49281	0.32579	-4.58211	4.603e-06	0.000220487	ins-4
C49G7.3	2943.12	-1.49261	0.259936	-5.74221	9.34503e-09	1.17363e-06	C49G7.3
W07B8.5	9677.48	-1.49207	0.243103	-6.13759	8.37815e-10	1.60527e-07	cpr-5
F47B10.7	649.403	-1.48848	0.304489	-4.88846	1.01627e-06	6.12424e-05	acbp-3
F58E6.10	51.7859	-1.48547	0.349606	-4.24898	2.14743e-05	0.000777077	unc-42
W07B8.1	251.791	-1.48503	0.259733	-5.71755	1.08073e-08	1.30254e-06	W07B8.1
M03D4.4	233.805	-1.48231	0.319181	-4.64411	3.41542e-06	0.000171287	M03D4.4
T12D8.10	93.4695	-1.48167	0.412768	-3.5896	0.000331191	0.00649561	T12D8.10
F45H10.2	1490.86	-1.47306	0.421954	-3.49103	0.000481153	0.00863245	F45H10.2
Y73B6BL.35	334.255	-1.46903	0.401839	-3.65577	0.000256416	0.00524232	Y73B6BL.35
Y54F10AM.6	238.812	-1.46866	0.375671	-3.90944	9.25108e-05	0.0024601	Y54F10AM.6
W03F8.1	1917.58	-1.46782	0.355987	-4.12324	3.73583e-05	0.00121904	tni-4
T19C4.1	509.056	-1.46725	0.253812	-5.78087	7.43167e-09	9.79897e-07	T19C4.1
ZK742.4	83.685	-1.46351	0.365279	-4.00656	6.16103e-05	0.00179901	ZK742.4
F41B4.2	115.259	-1.4617	0.347574	-4.20543	2.60592e-05	0.000903607	F41B4.2
T25E12.5	39.3883	-1.45317	0.361972	-4.01458	5.95507e-05	0.00176235	gyg-2
Y69A2AR.22	408.023	-1.45069	0.380391	-3.8137	0.000136904	0.00324214	Y69A2AR.22
C04F5.7	93.2191	-1.44454	0.380725	-3.79417	0.000148139	0.00345111	ugt-63
C24H11.5	79.7272	-1.44449	0.399918	-3.61198	0.000303872	0.00607694	C24H11.5
C15C7.4	204.014	-1.44278	0.34594	-4.1706	3.03797e-05	0.00102489	C15C7.4
T14B4.2	215.047	-1.43914	0.329988	-4.36118	1.29361e-05	0.000507428	T14B4.2
F38B2.2	57.6069	-1.43235	0.387514	-3.69626	0.000218797	0.00466464	F38B2.2
W03D8.8	125.705	-1.42885	0.268847	-5.31472	1.06822e-07	8.88319e-06	W03D8.8
Y71G12B.21	83.9253	-1.4242	0.369678	-3.85254	0.000116898	0.00287342	pqn-88
B0365.5	326.061	-1.42415	0.367521	-3.87502	0.000106615	0.00268243	clec-225
C11H1.9	979.244	-1.41289	0.261197	-5.40928	6.32797e-08	5.62926e-06	C11H1.9
Y105E8A.11	263.252	-1.40799	0.324686	-4.33647	1.44789e-05	0.000557699	Y105E8A.11
F58E10.7	481.713	-1.40744	0.382782	-3.67687	0.000236109	0.00493517	F58E10.7
T05C1.3	106.734	-1.40454	0.372991	-3.76562	0.000166135	0.00377913	T05C1.3
R07G3.6	532.37	-1.40332	0.393883	-3.56278	0.000366943	0.0070488	R07G3.6
H19M22.3	1101.24	-1.4026	0.266781	-5.25749	1.46034e-07	1.16089e-05	H19M22.3
C03H5.1	276.005	-1.3974	0.273212	-5.11471	3.14215e-07	2.18295e-05	clec-10
K01C8.3	151.839	-1.3891	0.272134	-5.10448	3.31703e-07	2.26361e-05	tdc-1
R166.1	302.54	-1.38466	0.249935	-5.5401	3.023e-08	3.01192e-06	mab-10
C34C12.6	650.191	-1.37133	0.222227	-6.17087	6.79149e-10	1.33551e-07	C34C12.6
Y65B4BR.2	123.225	-1.37032	0.324859	-4.2182	2.46263e-05	0.00086802	lpr-1
F53F4.16	279.517	-1.36392	0.317183	-4.3001	1.70724e-05	0.000637869	F53F4.16
K07C11.3	68.5057	-1.36211	0.38138	-3.57154	0.000354889	0.00684364	K07C11.3
Y73B6BL.21	133.284	-1.36071	0.366607	-3.71164	0.000205923	0.00445551	Y73B6BL.21
C01F1.3	1219.6	-1.35004	0.235952	-5.72166	1.05486e-08	1.2817e-06	C01F1.3
Y53F4B.29	535.571	-1.34998	0.324759	-4.15688	3.22626e-05	0.00107232	gst-26
F46G10.6	1806.55	-1.34607	0.297541	-4.52399	6.06847e-06	0.000265963	mxl-3
F22A3.6	2857.03	-1.34355	0.350842	-3.8295	0.000128402	0.00307526	ilys-5
M79.4	465.779	-1.34285	0.256218	-5.24105	1.59661e-07	1.25463e-05	flp-19
F33D4.3	403.891	-1.3425	0.334509	-4.01334	5.98648e-05	0.00176814	flp-13
Y46C8AL.5	761.002	-1.34054	0.306636	-4.37176	1.23247e-05	0.000489875	clec-72
C17G10.5	1907.48	-1.33848	0.362281	-3.69459	0.000220242	0.00468877	lys-8
W01A11.5	334.063	-1.33765	0.238465	-5.60941	2.03021e-08	2.19901e-06	cpt-6
F33H2.8	163.932	-1.3364	0.274282	-4.87234	1.10282e-06	6.54036e-05	F33H2.8
F54A3.5	1561.13	-1.33003	0.320278	-4.15274	3.28519e-05	0.00108382	F54A3.5
Y73B6BL.9	1266.83	-1.32652	0.195387	-6.78922	1.12743e-11	3.5103e-09	hil-2
C36E6.5	15297.5	-1.31179	0.278323	-4.71318	2.43879e-06	0.000128279	mlc-2
Y37D8A.18	246.516	-1.31148	0.23752	-5.52155	3.36017e-08	3.28221e-06	Y37D8A.18
C10G8.6	150.062	-1.31133	0.336893	-3.89241	9.92534e-05	0.0025487	ceh-34
F20G2.3	631.569	-1.30359	0.266161	-4.89773	9.69505e-07	5.88799e-05	F20G2.3
F11C7.2	254.55	-1.30066	0.276262	-4.70806	2.50088e-06	0.000130684	F11C7.2
C07A12.4	45731.6	-1.29611	0.300522	-4.31287	1.61148e-05	0.000610269	pdi-2
D1044.3	161.67	-1.28724	0.317054	-4.06	4.90718e-05	0.00152261	pqn-25
BE0003N10.3	155.685	-1.28695	0.284306	-4.52663	5.9931e-06	0.000264991	BE0003N10.3
F55D10.2	17433.9	-1.27864	0.360132	-3.55048	0.000384533	0.00729328	rpl-25.1
Y39A1A.20	48.241	-1.27008	0.345331	-3.67787	0.000235186	0.00492276	Y39A1A.20
K02F3.3	1311.02	-1.26436	0.23739	-5.32608	1.00355e-07	8.52164e-06	far-8
T14F9.4	573.61	-1.26072	0.328303	-3.84012	0.000122975	0.0029661	peb-1
Y48G8AR.2	117.436	-1.2587	0.277086	-4.54263	5.55573e-06	0.000250847	Y48G8AR.2
C02F12.3	816.426	-1.25472	0.340771	-3.682	0.000231416	0.00485745	C02F12.3
C24A8.4	128.325	-1.24635	0.225091	-5.5371	3.07528e-08	3.04372e-06	cst-2
C18B2.3	1098.34	-1.24376	0.234408	-5.30597	1.12075e-07	9.25394e-06	C18B2.3
F35C5.6	22858.8	-1.24232	0.318393	-3.90183	9.54663e-05	0.00249431	clec-63
Y56A3A.21	5183.99	-1.23755	0.311392	-3.97426	7.05986e-05	0.00197954	trap-4
K12H4.5	1196.45	-1.23402	0.284351	-4.33977	1.42633e-05	0.000552241	K12H4.5
T03D8.5	64.8247	-1.23226	0.302441	-4.07438	4.61362e-05	0.00145159	gcy-22
Y41C4A.6	51.0148	-1.23031	0.335055	-3.67196	0.000240701	0.00501013	Y41C4A.6
C48D5.1	402.677	-1.22685	0.338495	-3.62443	0.000289604	0.00582521	nhr-6
F53B3.6	1348.97	-1.22474	0.298668	-4.10068	4.11931e-05	0.00131265	F53B3.6
Y50D7A.10	166.506	-1.22419	0.328576	-3.72574	0.000194742	0.00426124	Y50D7A.10
F57F5.1	6546.99	-1.218	0.313033	-3.89096	9.98489e-05	0.00255959	F57F5.1
ZK643.3	41.4542	-1.21493	0.341803	-3.55448	0.000378731	0.00720119	ZK643.3
W10D9.5	594.283	-1.20898	0.217582	-5.55643	2.75345e-08	2.78043e-06	tomm-22
Y110A2AM.3	203.35	-1.20231	0.337785	-3.5594	0.000371703	0.00712193	ubc-26
T02H6.11	5487.79	-1.19771	0.294943	-4.06081	4.89028e-05	0.00152261	T02H6.11
T28C6.4	5957.19	-1.19133	0.33573	-3.54849	0.00038744	0.00732728	col-117
K07A12.2	649.74	-1.18274	0.262224	-4.51044	6.46948e-06	0.00028025	K07A12.2
Y18D10A.19	8680.11	-1.18193	0.216911	-5.44891	5.06791e-08	4.67531e-06	fkb-2
Y57A10A.29	203.782	-1.17824	0.341969	-3.44547	0.000570071	0.00980404	Y57A10A.29
Y58G8A.1	154.513	-1.17547	0.33999	-3.45737	0.000545483	0.00948756	lgc-26
F54E4.4	62.2489	-1.17045	0.29214	-4.00647	6.16322e-05	0.00179901	F54E4.4
R173.1	395.909	-1.16882	0.178661	-6.54212	6.06542e-11	1.51079e-08	cah-5
C39D10.2	130.048	-1.16755	0.277011	-4.21482	2.4998e-05	0.000876982	C39D10.2
M28.1	73.9341	-1.16377	0.323213	-3.60062	0.000317457	0.00628397	cutl-9
T08B1.6	260.703	-1.1627	0.274168	-4.24082	2.22708e-05	0.000802019	acs-3
C10F3.2	95.0173	-1.15892	0.306366	-3.7828	0.000155077	0.00356558	dhs-16
K03B4.4	160.644	-1.15852	0.253467	-4.57069	4.86125e-06	0.000231374	K03B4.4
T25F10.6	20693.1	-1.15512	0.228645	-5.05204	4.37107e-07	2.90336e-05	T25F10.6
ZK673.7	645.639	-1.15438	0.305048	-3.78427	0.000154159	0.0035554	tnc-2
W10G6.3	3338.49	-1.15351	0.243068	-4.74561	2.0788e-06	0.000112564	mua-6
ZC334.1	113.315	-1.15338	0.274757	-4.19783	2.69484e-05	0.000923725	ins-26
C04H5.1	246.316	-1.15034	0.277962	-4.13847	3.49629e-05	0.00114337	C04H5.1
T05D4.1	7168.08	-1.14909	0.209407	-5.48739	4.07924e-08	3.83423e-06	aldo-1
Y54G2A.23	1162.26	-1.14785	0.317926	-3.61044	0.000305682	0.00609936	Y54G2A.23
Y67D2.3	1589.48	-1.14238	0.319375	-3.57692	0.00034766	0.00674777	Y67D2.3
F08H9.7	501.229	-1.14043	0.235972	-4.83289	1.34566e-06	7.82527e-05	clec-56
ZK652.1	470.177	-1.13907	0.298756	-3.81272	0.000137446	0.00324507	snr-5
T20B3.2	1210.76	-1.12645	0.202213	-5.57058	2.53891e-08	2.61683e-06	tni-3
F28H1.2	7226.38	-1.12242	0.208943	-5.37191	7.79086e-08	6.80903e-06	cpn-3
C29E4.7	336.653	-1.11143	0.29575	-3.75801	0.000171273	0.0038783	gsto-1
K10H10.2	2208	-1.11108	0.289611	-3.83646	0.000124823	0.00300399	K10H10.2
E02H1.8	223.039	-1.10609	0.274714	-4.02633	5.66551e-05	0.00170364	E02H1.8
C53C9.2	2126.98	-1.10592	0.262961	-4.20563	2.6036e-05	0.000903607	C53C9.2
ZK973.10	1374.04	-1.10104	0.284059	-3.87609	0.000106151	0.00267976	lpd-5
W02H5.2	141.164	-1.09982	0.276708	-3.97466	7.04798e-05	0.00197954	W02H5.2
C25A1.13	402.951	-1.09579	0.255923	-4.28172	1.85452e-05	0.000686036	C25A1.13
F32H2.5	17955.6	-1.09547	0.238063	-4.60158	4.19292e-06	0.000202139	fasn-1
T28C12.2	99.4447	-1.08577	0.301117	-3.60581	0.000311181	0.00619254	T28C12.2
K05C4.1	2109.49	-1.08164	0.275704	-3.92321	8.73785e-05	0.00234027	pbs-5
F23H12.5	1870.52	-1.07895	0.290452	-3.71472	0.00020343	0.00442543	F23H12.5
Y71F9B.4	612.775	-1.07665	0.259024	-4.15656	3.23071e-05	0.00107232	snr-7
R03G5.1	43620.6	-1.07514	0.231737	-4.63946	3.49324e-06	0.000174021	eef-1A.2
T04D3.5	60.2125	-1.07464	0.308135	-3.48757	0.000487433	0.00869295	T04D3.5
K02F3.11	803.541	-1.07183	0.250459	-4.27946	1.87346e-05	0.00069133	rnp-5
ZK1320.3	916.618	-1.07171	0.239041	-4.48338	7.34695e-06	0.000311932	ZK1320.3
R186.8	251.228	-1.06981	0.274619	-3.89563	9.79446e-05	0.00252376	R186.8
K02F2.2	49560.2	-1.06598	0.200433	-5.3184	1.04685e-07	8.83904e-06	ahcy-1
F11C3.2	101.212	-1.06489	0.300117	-3.54824	0.000387814	0.00732728	unc-122
W02G9.4	360.614	-1.05527	0.208336	-5.06521	4.07953e-07	2.72181e-05	W02G9.4
M03F4.2	48227.8	-1.0516	0.212614	-4.94603	7.57424e-07	4.71654e-05	act-4
F58F12.1	7798.53	-1.04243	0.273349	-3.81355	0.000136986	0.00324214	F58F12.1
Y92H12BR.2	415.905	-1.04213	0.269212	-3.87104	0.000108373	0.00271296	Y92H12BR.2
C14C6.2	584.731	-1.04184	0.270667	-3.84916	0.000118525	0.00289437	C14C6.2
C36E6.3	16701.2	-1.04136	0.195098	-5.33761	9.4182e-08	8.04315e-06	mlc-1
F38A1.5	292.49	-1.03532	0.286654	-3.61174	0.000304152	0.00607694	clec-166
F25H8.5	5621.18	-1.03115	0.290812	-3.54576	0.000391476	0.00736852	dur-1
C31E10.7	1538.37	-1.03025	0.221107	-4.65951	3.16968e-06	0.000160914	C31E10.7
F35A5.1	4195.38	-1.02965	0.280492	-3.67085	0.000241742	0.0050248	F35A5.1
F21D5.8	446.976	-1.0206	0.242122	-4.21525	2.49502e-05	0.000876982	F21D5.8
C17D12.2	390.29	-1.014	0.283272	-3.57961	0.000344102	0.00669611	unc-75
PAR2.1	566.769	-1.01319	0.282968	-3.58057	0.000342841	0.00668813	mtss-1
F46C8.3	183.452	-1.01296	0.234881	-4.31267	1.61296e-05	0.000610269	F46C8.3
F21G4.2	1060.49	-1.01169	0.266961	-3.78967	0.000150846	0.0035006	mrp-4
F56B6.4	2807.01	-1.01165	0.27431	-3.68798	0.000226041	0.00477145	gyg-1
T03D8.2	476.934	-1.01018	0.210345	-4.8025	1.56693e-06	8.80368e-05	T03D8.2
F46H5.3	38850.3	-1.00614	0.213375	-4.71537	2.41272e-06	0.000127772	F46H5.3
Y38F1A.9	160.691	-1.00576	0.239312	-4.20273	2.63715e-05	0.000908114	oig-2
T13A10.5	508.762	-0.998884	0.260128	-3.83997	0.00012305	0.0029661	nlp-16
R03D7.6	486.588	-0.99216	0.244927	-4.05084	5.10349e-05	0.00157261	gst-5
Y48D7A.2	582.78	-0.988628	0.284139	-3.47938	0.000502575	0.00888873	flp-18
Y105E8A.7	747.781	-0.988006	0.216569	-4.56208	5.06496e-06	0.00023528	eat-18
R148.5	968.822	-0.98776	0.269632	-3.66337	0.000248923	0.00514764	R148.5
F09B12.3	5673.88	-0.981336	0.249534	-3.93267	8.40063e-05	0.00227441	F09B12.3
C06G1.6	642.202	-0.979186	0.272424	-3.59435	0.000325203	0.00640336	C06G1.6
ZK470.2	2628.19	-0.976561	0.256817	-3.80256	0.000143211	0.00335996	ZK470.2
W01G7.3	273.775	-0.975037	0.258889	-3.76623	0.000165728	0.00377562	rpb-11
F54D11.1	10839.6	-0.97487	0.243105	-4.01008	6.06986e-05	0.0017822	pmt-2
Y105E8B.9	172.837	-0.974759	0.247723	-3.93487	8.32413e-05	0.00226189	Y105E8B.9
B0365.1	966.527	-0.973624	0.262192	-3.7134	0.000204493	0.00444208	B0365.1
Y55F3AM.13	1629.56	-0.9637	0.274194	-3.51466	0.000440312	0.00803476	Y55F3AM.13
F01G10.1	10402.2	-0.959178	0.260251	-3.68559	0.000228172	0.0047961	tkt-1
Y65B4BR.5	13275.9	-0.955413	0.258884	-3.69051	0.000223802	0.00473085	Y65B4BR.5
Y34D9A.6	712.167	-0.951897	0.247675	-3.84332	0.000121379	0.00294961	glrx-10
F25H2.4	358.668	-0.948368	0.251611	-3.76918	0.000163784	0.00374273	F25H2.4
K08D12.3	5060.81	-0.945877	0.20783	-4.55121	5.33381e-06	0.000242291	K08D12.3
F54E2.4	285.939	-0.944619	0.247715	-3.81333	0.000137105	0.00324214	F54E2.4
F27C1.7	10017	-0.943073	0.227332	-4.14845	3.3474e-05	0.00109949	atp-3
Y43F8B.1	2322.09	-0.942952	0.27176	-3.46979	0.000520863	0.00919043	Y43F8B.1
F23B12.5	5757.07	-0.942597	0.189032	-4.98644	6.15023e-07	3.96186e-05	F23B12.5
T25G12.4	996.612	-0.942035	0.236184	-3.98857	6.64732e-05	0.00190315	rab-6.2
Y67H2A.5	6393.15	-0.941363	0.214496	-4.38872	1.14022e-05	0.00046559	Y67H2A.5
C05D11.11	6969.69	-0.939166	0.248101	-3.78542	0.000153452	0.0035554	mel-32
K10C9.3	345.589	-0.938768	0.224709	-4.1777	2.94466e-05	0.000995656	K10C9.3
F23H12.2	593.92	-0.932774	0.245526	-3.79908	0.000145237	0.00339682	tomm-20
C07A9.2	200.238	-0.932261	0.212915	-4.37857	1.19463e-05	0.000481617	C07A9.2
F54E2.3	12673.7	-0.927	0.244334	-3.79398	0.000148251	0.00345111	ketn-1
C14B1.1	4693	-0.923778	0.230886	-4.00102	6.30698e-05	0.00182317	pdi-1
R01H10.3	795.953	-0.922195	0.239695	-3.84737	0.000119391	0.00290601	cor-1
Y7A9A.1	197.944	-0.922037	0.227341	-4.05574	4.99753e-05	0.00154634	Y7A9A.1
C26G2.1	433.023	-0.918936	0.259867	-3.53617	0.000405967	0.00755564	syg-2
W01A11.1	929.646	-0.914858	0.228756	-3.99928	6.35352e-05	0.00183308	W01A11.1
Y39A3B.5	152.763	-0.913661	0.244559	-3.73595	0.000187011	0.00413443	ckr-2
C01F6.9	1258.85	-0.912236	0.203503	-4.48267	7.37144e-06	0.000312085	C01F6.9
F25H2.5	23989.1	-0.910611	0.193139	-4.7148	2.4195e-06	0.000127772	F25H2.5
F55D10.1	217.314	-0.907307	0.228205	-3.97585	7.0128e-05	0.00197596	aman-1
ZK721.2	12404.7	-0.905475	0.206584	-4.38308	1.17013e-05	0.000475207	unc-27
T28D9.2	448.488	-0.902142	0.211303	-4.26942	1.95978e-05	0.000721401	rsp-5
R151.10	198.763	-0.89558	0.255558	-3.50441	0.000457627	0.00828998	R151.10
Y105E8B.1	29622.6	-0.89383	0.226319	-3.94943	7.83388e-05	0.00214427	lev-11
Y95D11A.1	268.154	-0.884537	0.244332	-3.62023	0.000294343	0.00590464	Y95D11A.1
Y54E10BR.6	316.996	-0.884359	0.241483	-3.6622	0.000250062	0.00514764	rpb-7
F20H11.3	18710.7	-0.88149	0.196867	-4.47758	7.54934e-06	0.000318714	mdh-2
T14G12.3	1508.57	-0.877932	0.198595	-4.4207	9.83795e-06	0.000408412	tag-18
E03D2.2	644.323	-0.876973	0.206986	-4.23687	2.2666e-05	0.000812335	nlp-9
F11C3.3	146568	-0.875974	0.208853	-4.19421	2.73822e-05	0.000936446	unc-54
Y37D8A.23	1170.56	-0.873728	0.235816	-3.70512	0.00021129	0.00454546	unc-25
F08B4.7	296.562	-0.867373	0.216519	-4.006	6.17566e-05	0.00179913	F08B4.7
Y75B12B.2	11517.9	-0.867287	0.189874	-4.5677	4.93103e-06	0.00023321	cyn-7
C04C3.3	3570.25	-0.864685	0.247595	-3.49234	0.000478805	0.00861099	C04C3.3
C09D1.1	15552.1	-0.861808	0.24718	-3.48656	0.000489271	0.00870494	unc-89
F07A11.2	1458.72	-0.860785	0.202435	-4.25215	2.11733e-05	0.000773678	F07A11.2
Y56A3A.19	1741.67	-0.860275	0.206962	-4.15668	3.22907e-05	0.00107232	Y56A3A.19
ZC477.9	6326.95	-0.856906	0.239092	-3.58399	0.000338382	0.00661062	deb-1
Y69A2AR.31	703.51	-0.855822	0.211984	-4.03721	5.40912e-05	0.0016443	Y69A2AR.31
T05H4.5	1550.08	-0.853164	0.220046	-3.8772	0.000105663	0.00267198	T05H4.5
Y15E3A.1	628.446	-0.853106	0.223801	-3.81189	0.00013791	0.00325088	nhr-91
Y40H4A.1	230.696	-0.845333	0.210277	-4.0201	5.81746e-05	0.00173537	gar-3
ZK809.3	2137.88	-0.838887	0.240469	-3.48854	0.00048567	0.00867185	ZK809.3
Y119C1B.4	397.994	-0.838448	0.190324	-4.40536	1.05606e-05	0.00043479	Y119C1B.4
F07C6.3	215.636	-0.83557	0.221184	-3.77771	0.000158275	0.00362795	F07C6.3
F54D11.4	364.382	-0.830901	0.20919	-3.97199	7.12744e-05	0.00198731	F54D11.4
ZK455.1	6998.28	-0.824148	0.222611	-3.70219	0.000213749	0.00458823	aco-1
F07A5.7	57500.7	-0.822505	0.170878	-4.81342	1.48371e-06	8.5285e-05	unc-15
W08F4.3	937.82	-0.822027	0.214378	-3.83448	0.000125829	0.00302332	W08F4.3
Y7A5A.1	843.014	-0.817309	0.225638	-3.62221	0.0002921	0.00586753	Y7A5A.1
K08F11.3	2383.23	-0.814573	0.192496	-4.23163	2.32003e-05	0.000825544	cif-1
C09B8.6	4119.58	-0.810141	0.230088	-3.521	0.000429928	0.00790317	hsp-25
C02F5.9	1586.04	-0.80663	0.233183	-3.45921	0.000541755	0.00945121	pbs-6
ZK617.1	18999.1	-0.805429	0.19951	-4.03703	5.41316e-05	0.0016443	unc-22
T04G9.4	541.67	-0.805257	0.207322	-3.88409	0.000102716	0.00261069	T04G9.4
F54C9.1	17373.7	-0.801654	0.226291	-3.54258	0.000396228	0.00743923	iff-2
C34E10.6	46970	-0.79833	0.200381	-3.98406	6.77464e-05	0.00192485	atp-2
K12C11.2	1712.82	-0.796767	0.228279	-3.49033	0.000482431	0.008642	smo-1
T04A8.7	705.094	-0.79593	0.228121	-3.48907	0.000484702	0.00866491	T04A8.7
F02E8.1	12570.5	-0.795122	0.189257	-4.20128	2.6541e-05	0.000911851	asb-2
F56H1.7	652.348	-0.79025	0.20316	-3.88979	0.000100332	0.00256757	F56H1.7
F32H5.1	447.743	-0.788113	0.193548	-4.07193	4.66245e-05	0.0014608	F32H5.1
T10G3.6	189.764	-0.784661	0.227908	-3.44288	0.000575557	0.00987566	gut-2
F53G2.4	182.402	-0.780803	0.194282	-4.01891	5.84688e-05	0.00174067	pqn-42
C46C11.1	354.196	-0.779686	0.205997	-3.78494	0.000153744	0.0035554	C46C11.1
C14F11.1	4297.57	-0.775327	0.18903	-4.1016	4.10296e-05	0.00131265	C14F11.1
T21B10.1	479.298	-0.758383	0.195697	-3.8753	0.000106493	0.00268243	T21B10.1
F08B6.4	9904.3	-0.75584	0.184109	-4.10539	4.03627e-05	0.00129446	unc-87
C15F1.6	4499.66	-0.753605	0.217597	-3.4633	0.000533595	0.00937082	art-1
C01B10.6	3337	-0.745857	0.198632	-3.75497	0.000173361	0.00389911	C01B10.6
D2063.3	587.105	-0.744328	0.211556	-3.51835	0.000434243	0.00794341	D2063.3
B0285.7	450.921	-0.742053	0.212385	-3.4939	0.000476024	0.0085713	mnp-1
B0491.5	3510.31	-0.741642	0.205826	-3.60325	0.000314266	0.00622905	B0491.5
T10H10.1	2021.09	-0.740691	0.210043	-3.52638	0.000421282	0.00777291	hum-6
C50F4.5	2191.72	-0.739832	0.197264	-3.75046	0.000176512	0.00394906	his-41
R05G6.7	20059.4	-0.729345	0.181177	-4.02559	5.68328e-05	0.00170555	R05G6.7
R53.4	10699.3	-0.725352	0.202877	-3.57533	0.000349785	0.00676266	R53.4
K01G5.4	4877.07	-0.719602	0.198996	-3.61616	0.000299005	0.00599011	ran-1
T16G1.11	1214.54	-0.712229	0.200136	-3.55873	0.000372658	0.00713108	eif-3.K
T18H9.2	9602.28	-0.70941	0.182726	-3.88238	0.00010344	0.00262465	asp-2
T07D3.9	379.264	-0.6984	0.192382	-3.63028	0.000283114	0.00571775	T07D3.9
T22F3.3	10817.5	-0.67896	0.196792	-3.45014	0.00056029	0.00968039	T22F3.3
H28O16.1	51587.8	-0.675479	0.179898	-3.75478	0.000173497	0.00389911	H28O16.1
F45E12.5	745.727	-0.659187	0.188175	-3.50305	0.000459967	0.00832229	F45E12.5
Y69A2AR.18	14473.2	-0.650999	0.180576	-3.60512	0.000312012	0.00620082	Y69A2AR.18
R05D11.3	908.389	-0.640791	0.173588	-3.69145	0.00022298	0.00472017	ran-4
F59E12.1	455.683	-0.633943	0.170804	-3.71154	0.000206006	0.00445551	F59E12.1
F38B2.4	916.72	-0.631906	0.16605	-3.80553	0.000141501	0.00332506	F38B2.4
T21D12.4	744.307	-0.616685	0.175207	-3.51974	0.000431963	0.00792109	pat-6
Y87G2A.8	2869.26	-0.612722	0.173739	-3.52667	0.000420813	0.00777291	gpi-1
C14F11.2	527.131	-0.610601	0.176882	-3.45202	0.000556398	0.00964013	C14F11.2
Y106G6H.2	49430.8	-0.583847	0.16954	-3.4437	0.000573803	0.00985688	pab-1
C37E2.1	2189.24	-0.549696	0.157752	-3.48456	0.00049295	0.00874957	C37E2.1
K02F3.2	1554.87	-0.491789	0.134519	-3.6559	0.000256283	0.00524232	K02F3.2
T19C3.8	478.844	0.572701	0.159325	3.59456	0.000324945	0.00640336	fem-2
C27A12.8	503.727	0.584768	0.166603	3.50995	0.000448197	0.00815871	ari-1
F55A3.1	971.297	0.60812	0.153818	3.9535	7.70166e-05	0.00211345	F55A3.1
C33H5.9	400.808	0.634838	0.168993	3.7566	0.000172234	0.00389416	sec-10
R03G5.2	948.517	0.640455	0.164299	3.89811	9.69446e-05	0.00251394	sek-1
F13D11.1	189.583	0.65348	0.185019	3.53196	0.000412499	0.00763915	acp-5
W02D3.7	553.898	0.656415	0.187094	3.50848	0.000450678	0.0081939	lbp-5
F36F2.6	426.779	0.665433	0.190663	3.4901	0.000482842	0.008642	fcp-1
K08F8.3	255.802	0.665586	0.187634	3.54726	0.000389256	0.00734524	fut-1
T01G1.1	2192.18	0.702708	0.191849	3.66282	0.000249459	0.00514764	klp-12
C41D11.1	229.675	0.709804	0.183894	3.85986	0.00011345	0.00279787	eri-6
F35D11.11	1857.72	0.714984	0.206688	3.45924	0.0005417	0.00945121	dyf-14
T02C5.3	1167.33	0.716533	0.183539	3.90399	9.46211e-05	0.00248526	igcm-3
F13E6.4	1181.64	0.72102	0.206208	3.49657	0.000471283	0.00849618	F13E6.4
C37A2.8	440.332	0.734329	0.209533	3.5046	0.000457293	0.00828998	C37A2.8
F09F7.5	544.837	0.735894	0.204736	3.59435	0.0003252	0.00640336	F09F7.5
F37B12.3	365.918	0.749354	0.179832	4.16697	3.0868e-05	0.00103668	F37B12.3
Y38F2AR.6	145.159	0.769288	0.20754	3.7067	0.000209977	0.00452829	Y38F2AR.6
C16C2.4	714.984	0.773163	0.196692	3.93083	8.46548e-05	0.00228782	C16C2.4
M01B12.5	1042.22	0.78408	0.203008	3.86231	0.00011232	0.00279305	riok-1
F15B9.7	872.774	0.796135	0.216348	3.67988	0.00023334	0.00489098	fmi-1
F13B12.6	466.088	0.798526	0.231512	3.44917	0.000562312	0.00969292	F13B12.6
M106.3	975.052	0.811715	0.207774	3.90673	9.35551e-05	0.00247466	M106.3
T07C4.10	455.783	0.827934	0.220679	3.75175	0.000175605	0.00394055	T07C4.10
K10B4.3	417.823	0.836259	0.184131	4.54166	5.58143e-06	0.000251248	K10B4.3
ZK177.8	310.593	0.843463	0.184778	4.56473	5.00126e-06	0.00023447	ZK177.8
T24D1.1	944.451	0.86147	0.232515	3.70501	0.000211381	0.00454546	sqv-5
F02E8.5	198.635	0.865593	0.230796	3.75046	0.000176509	0.00394906	atg-16.1
F54D1.6	2167.66	0.86821	0.223276	3.8885	0.000100864	0.00257496	F54D1.6
T05A6.2	191.487	0.876319	0.234367	3.73909	0.00018469	0.00409524	cki-2
T23F11.1	2443.64	0.894611	0.215581	4.14976	3.32821e-05	0.0010956	T23F11.1
C36E8.2	295.201	0.905617	0.230692	3.92565	8.64954e-05	0.00232078	glb-11
T12E12.1	394.441	0.906528	0.252411	3.59148	0.000328809	0.00646586	T12E12.1
W06F12.2	670.542	0.915885	0.209947	4.36246	1.28609e-05	0.000505807	W06F12.2
R03H10.7	91.1457	0.922928	0.253715	3.63765	0.000275133	0.00558676	R03H10.7
ZC581.3	361.61	0.923943	0.255944	3.60994	0.000306272	0.00610298	ZC581.3
B0464.4	758.123	0.942567	0.235363	4.00473	6.20883e-05	0.00180177	bre-3
F56D5.6	958.977	0.946566	0.184123	5.14094	2.73365e-07	1.95476e-05	F56D5.6
R11D1.1	237.541	0.96092	0.231314	4.15417	3.26465e-05	0.00107943	R11D1.1
C54D10.1	328.75	0.963453	0.278685	3.45713	0.000545955	0.00948756	cdr-2
T28C6.1	1743.33	0.969959	0.212523	4.56402	5.01837e-06	0.00023447	grsp-2
T06D8.1	16094.8	0.970827	0.262861	3.69331	0.00022135	0.00469897	T06D8.1
F46F11.1	1260.39	0.978334	0.185802	5.26546	1.39835e-07	1.12458e-05	F46F11.1
C05C12.3	944.001	0.984297	0.270716	3.63591	0.000277002	0.0056171	gtl-1
B0041.2	3539.3	0.984342	0.243028	4.05032	5.11472e-05	0.00157283	ain-2
W01F3.1	563.468	0.985287	0.206431	4.77297	1.81531e-06	0.000100481	W01F3.1
C41D11.7	129.996	0.986912	0.269533	3.66156	0.000250685	0.00515336	eri-7
F56C9.8	364.695	0.992812	0.246687	4.02459	5.70751e-05	0.00170939	F56C9.8
H14N18.4	684.438	0.993711	0.221564	4.48499	7.29181e-06	0.000310473	H14N18.4
ZK270.1	2758.3	0.996148	0.255647	3.89658	9.75612e-05	0.00251823	ptr-23
T19B10.7	181.834	1.02169	0.255295	4.00201	6.28053e-05	0.00181904	ima-1
ZK112.7	565.176	1.02352	0.287658	3.55811	0.000373534	0.00713871	cdh-3
Y77E11A.12	198.594	1.02626	0.296244	3.46425	0.000531711	0.00934873	Y77E11A.12
C34D1.5	115.032	1.03201	0.2542	4.05984	4.91065e-05	0.00152261	zip-5
D2096.4	372.972	1.03654	0.218962	4.73389	2.2026e-06	0.00011841	sqv-1
C34C12.4	467.596	1.04312	0.267157	3.90453	9.44096e-05	0.00248407	C34C12.4
C25F9.10	91.9179	1.04547	0.271573	3.84969	0.000118268	0.00289281	C25F9.10
F54H5.4	253.778	1.0456	0.269869	3.87446	0.000106862	0.00268412	klf-3
B0403.3	53.6845	1.0505	0.297312	3.53334	0.00041035	0.0076125	B0403.3
F02D8.4	633.925	1.05178	0.263153	3.99684	6.4194e-05	0.00184772	F02D8.4
K03B8.9	180.567	1.05473	0.272364	3.8725	0.000107725	0.00270125	deg-3
T19A5.2	798.832	1.06291	0.278681	3.81408	0.000136689	0.00324214	gck-1
T01C2.1	180.751	1.0657	0.283799	3.75513	0.000173255	0.00389911	acy-4
Y32F6B.1	995.938	1.06591	0.268629	3.96796	7.249e-05	0.00201369	Y32F6B.1
F23H12.3	61.645	1.06853	0.270899	3.94438	8.00058e-05	0.0021859	F23H12.3
F26E4.7	131.836	1.06956	0.262846	4.06915	4.71856e-05	0.00147297	F26E4.7
Y41D4B.16	1295.83	1.06981	0.299798	3.56843	0.000359125	0.0069164	Y41D4B.16
ZK945.1	716.47	1.07027	0.272399	3.92903	8.52886e-05	0.00229664	lact-2
C38D4.6	94.6219	1.0704	0.251809	4.25086	2.12948e-05	0.000776165	pal-1
T12A2.1	297.525	1.07256	0.270554	3.96431	7.36086e-05	0.00203342	T12A2.1
C27C12.7	388.123	1.07261	0.290044	3.69809	0.000217229	0.00463784	dpf-2
M7.12	86.5923	1.07397	0.300367	3.57552	0.000349533	0.00676266	M7.12
F23H12.1	231.769	1.07622	0.279631	3.84873	0.000118733	0.00289471	snb-2
F21G4.1	209.159	1.08199	0.227577	4.7544	1.99034e-06	0.000108959	F21G4.1
T07A5.3	89.6615	1.0834	0.286369	3.78323	0.000154807	0.00356486	vglu-3
Y43E12A.2	1011.93	1.08443	0.197221	5.49856	3.82903e-08	3.64489e-06	Y43E12A.2
ZK370.7	115.768	1.09156	0.271044	4.02723	5.64373e-05	0.00170052	ugtp-1
F25G6.3	126.259	1.09635	0.293313	3.73782	0.00018562	0.00410976	acr-16
F36H5.1	305.185	1.10794	0.216715	5.11241	3.18079e-07	2.19064e-05	math-26
F48C1.1	275.528	1.10846	0.313039	3.54097	0.000398657	0.00746608	aman-3
ZK1193.5	1082.05	1.10926	0.258431	4.29228	1.7685e-05	0.000655839	dve-1
K08C7.2	664.966	1.11251	0.310106	3.58751	0.000333854	0.00653924	fmo-1
ZK507.4	57.4533	1.11303	0.293135	3.79698	0.000146469	0.00342028	dos-1
C06B8.2	142.641	1.12161	0.272231	4.12007	3.78752e-05	0.00123053	C06B8.2
F57H12.7	1198.13	1.12332	0.283329	3.96472	7.34833e-05	0.00203342	mec-17
Y22F5A.1	81.001	1.13374	0.309523	3.66285	0.000249422	0.00514764	nhr-232
T07C12.11	81.1161	1.13797	0.318459	3.57336	0.000352426	0.00680491	T07C12.11
Y38C1AA.13	129.244	1.14047	0.232157	4.91249	8.99251e-07	5.50791e-05	gfrp-1
C25A1.5	1098.86	1.14269	0.311754	3.66534	0.000247013	0.00512012	C25A1.5
F01G10.2	389.685	1.14572	0.278047	4.12059	3.77899e-05	0.00123044	ech-8
C01F1.6	481.49	1.14612	0.205425	5.57925	2.41556e-08	2.52022e-06	C01F1.6
C08C3.1	263.626	1.15099	0.330681	3.48065	0.000500189	0.00885703	egl-5
F38E11.7	73.9417	1.15294	0.275785	4.18058	2.90763e-05	0.000985363	wrt-3
T25D10.1	130.028	1.15643	0.318751	3.628	0.000285629	0.00575976	T25D10.1
T08A9.11	350.048	1.17039	0.337782	3.46494	0.000530357	0.00933591	ttr-59
K03A11.5	190.055	1.17751	0.34108	3.4523	0.000555838	0.00964013	K03A11.5
F29G6.1	269.408	1.1843	0.23932	4.94862	7.47402e-07	4.67361e-05	F29G6.1
C08B6.3	59.8143	1.18586	0.337835	3.51018	0.000447808	0.00815871	C08B6.3
C28A5.3	219.256	1.1918	0.257629	4.62604	3.72728e-06	0.000183238	nex-3
C17H12.13	458.281	1.20176	0.285371	4.21121	2.5401e-05	0.000884891	C17H12.13
Y39D8C.1	1557.37	1.20614	0.254043	4.7478	2.05644e-06	0.000112166	abt-4
T13C5.1	228.539	1.20639	0.317465	3.80008	0.000144652	0.00338844	daf-9
C53A5.5	70.7587	1.2066	0.285394	4.22782	2.35963e-05	0.000837642	C53A5.5
C02H6.2	95.9917	1.20829	0.232997	5.18586	2.15023e-07	1.59876e-05	fbxa-105
M03A8.3	150.132	1.21139	0.212818	5.69214	1.25457e-08	1.47634e-06	M03A8.3
Y67D8C.8	1121.72	1.21882	0.180786	6.74175	1.56493e-11	4.49767e-09	cpg-9
Y73F8A.30	99.8347	1.22252	0.297041	4.11566	3.86067e-05	0.00125158	acr-24
C49C8.5	1207.73	1.2226	0.287649	4.25033	2.13452e-05	0.000776165	C49C8.5
W05B2.7	92.2236	1.22956	0.270627	4.54336	5.53633e-06	0.000250729	W05B2.7
C15B12.7	632.438	1.23178	0.157286	7.83147	4.82217e-15	3.43178e-12	cdf-1
T28F3.8	424.231	1.23198	0.348499	3.53511	0.000407611	0.00757681	T28F3.8
M05B5.2	344.237	1.23656	0.316802	3.90327	9.49021e-05	0.00248827	M05B5.2
T19C9.8	52.5002	1.23779	0.312225	3.96442	7.35733e-05	0.00203342	T19C9.8
C17G1.5	138.278	1.2384	0.288328	4.29513	1.74594e-05	0.000649081	C17G1.5
F38A6.1	1215.07	1.24557	0.249913	4.98401	6.22793e-07	3.9947e-05	pha-4
B0563.7	48.5781	1.25223	0.2958	4.23338	2.302e-05	0.000821084	B0563.7
D2030.10	91.2423	1.26497	0.34243	3.69411	0.000220659	0.00469096	aex-1
D2021.2	870.179	1.27514	0.281784	4.52525	6.03237e-06	0.000265317	tag-233
B0222.6	8430.94	1.29441	0.361539	3.58027	0.000343245	0.00668813	col-144
ZK370.5	937.843	1.30122	0.263624	4.9359	7.97806e-07	4.92695e-05	pdhk-2
C34F6.11	65.406	1.30593	0.333923	3.91086	9.19685e-05	0.00245003	C34F6.11
F10C2.3	50.251	1.31371	0.329489	3.98712	6.68795e-05	0.00190598	F10C2.3
ZK1055.6	125.269	1.3185	0.290393	4.54042	5.61426e-06	0.000251967	ZK1055.6
C31E10.8	114.309	1.33121	0.331112	4.02041	5.80978e-05	0.00173537	tbc-19
T26H10.1	310.617	1.34299	0.206934	6.48991	8.58885e-11	2.07033e-08	des-2
M04C3.1	670.799	1.34333	0.210192	6.39097	1.64837e-10	3.73515e-08	M04C3.1
Y47G6A.19	1702.77	1.34853	0.369588	3.64873	0.00026354	0.00537326	Y47G6A.19
R52.3	86.1571	1.35117	0.298433	4.52755	5.96701e-06	0.00026462	math-35
C55B7.1	196.134	1.3575	0.2449	5.54308	2.97202e-08	2.981e-06	glh-2
T12B5.10	133.684	1.36266	0.307456	4.43203	9.33488e-06	0.000390784	fbxa-60
Y106G6E.5	545.724	1.36312	0.371737	3.66688	0.000245525	0.00509635	ced-12
C09F12.1	268.704	1.36408	0.244531	5.57834	2.42832e-08	2.52022e-06	clc-1
ZK1010.8	82.061	1.36533	0.274915	4.96635	6.82256e-07	4.32047e-05	ZK1010.8
F16F9.4	390.856	1.36651	0.301983	4.52513	6.03598e-06	0.000265317	F16F9.4
Y38C1AA.6	60.8489	1.36664	0.369339	3.70024	0.000215396	0.00460528	Y38C1AA.6
F40F9.2	216.686	1.36959	0.243736	5.61913	1.9192e-08	2.12438e-06	tag-120
F15C11.1	2786.27	1.37126	0.26761	5.12411	2.98952e-07	2.12336e-05	sem-4
Y42A5A.3	64.9632	1.37966	0.318627	4.33002	1.49095e-05	0.00056988	Y42A5A.3
F21A3.3	322.993	1.38252	0.359902	3.84139	0.00012234	0.00295852	F21A3.3
T05F1.11	272.446	1.38515	0.317099	4.36819	1.25279e-05	0.000495318	T05F1.11
Y82E9BL.15	32.1938	1.38977	0.345886	4.018	5.86934e-05	0.00174388	fbxa-19
K05C4.11	80.1693	1.40464	0.295093	4.76	1.93597e-06	0.000106764	K05C4.11
T03F7.7	274.023	1.41117	0.273294	5.16355	2.42312e-07	1.76676e-05	T03F7.7
R10H1.1	333.139	1.41461	0.221429	6.38856	1.67451e-10	3.73515e-08	R10H1.1
T25F10.3	523.691	1.42285	0.3636	3.91322	9.10725e-05	0.0024305	T25F10.3
T12B5.8	90.4695	1.42578	0.365536	3.90051	9.59887e-05	0.00249922	fbxa-59
F46C8.5	171.525	1.42646	0.346897	4.11208	3.92117e-05	0.00126297	ceh-14
Y75B8A.29	390.644	1.42985	0.25629	5.57904	2.41855e-08	2.52022e-06	Y75B8A.29
ZK337.5	248.471	1.43163	0.39383	3.63516	0.000277807	0.00562579	mtd-1
ZK84.1	3851.5	1.44566	0.386413	3.74122	0.000183131	0.00408271	ZK84.1
T07H6.2	43.8155	1.45711	0.361036	4.03592	5.43896e-05	0.00164879	mom-1
C46F9.3	67.9713	1.45876	0.422895	3.44947	0.000561685	0.00969292	math-24
ZK896.5	178.69	1.45911	0.239475	6.09293	1.1086e-09	2.0205e-07	ZK896.5
C11E4.1	694.134	1.46401	0.379133	3.86147	0.000112705	0.00279787	C11E4.1
F53B2.8	697.189	1.47468	0.278502	5.29506	1.18981e-07	9.77014e-06	F53B2.8
F38A5.3	171.43	1.47481	0.327663	4.501	6.76346e-06	0.000292139	lec-11
C05C10.4	4696.58	1.4761	0.26156	5.64346	1.66664e-08	1.89159e-06	pho-11
F56H11.1	689.363	1.47976	0.413577	3.57796	0.000346292	0.00672994	fbl-1
F53F10.4	5749.01	1.49241	0.340166	4.38731	1.14762e-05	0.000467335	unc-108
F28H7.8	209.267	1.4939	0.310107	4.81739	1.45448e-06	8.39273e-05	F28H7.8
C25F9.5	115.476	1.50096	0.356968	4.20474	2.61384e-05	0.000904255	C25F9.5
F38E1.7	55.5621	1.50326	0.344008	4.36985	1.24335e-05	0.000492886	mom-2
Y48G10A.6	33.5328	1.50514	0.379173	3.96955	7.20083e-05	0.00200403	Y48G10A.6
F41B5.3	50.3881	1.50709	0.430753	3.49874	0.000467465	0.00843751	cyp-33C5
T10E9.3	303.56	1.50913	0.267776	5.63579	1.74257e-08	1.94349e-06	T10E9.3
C49C3.9	239.532	1.5097	0.331545	4.55354	5.27496e-06	0.00024151	C49C3.9
Y47H10A.5	65.9801	1.51783	0.407016	3.72917	0.000192114	0.00422227	Y47H10A.5
Y51A2D.15	983.28	1.51877	0.213241	7.12232	1.06128e-12	4.06687e-10	Y51A2D.15
ZC239.16	37.4577	1.51992	0.384056	3.95756	7.57199e-05	0.00208404	ZC239.16
F59C6.11	75.4934	1.52276	0.297477	5.11892	3.07285e-07	2.15604e-05	F59C6.11
F56B6.6	78.1353	1.52664	0.435173	3.50811	0.000451304	0.0081953	F56B6.6
F35E12.10	306.715	1.53374	0.301051	5.09463	3.49425e-07	2.37371e-05	F35E12.10
T23H4.1	53.249	1.53986	0.428294	3.59533	0.000323983	0.00640336	inx-20
C08F1.5	429.791	1.54096	0.364788	4.22427	2.39718e-05	0.000848955	math-4
F10A3.17	281.078	1.54546	0.298171	5.18314	2.1818e-07	1.61421e-05	F10A3.17
T01E8.8	58.7699	1.54667	0.358697	4.3119	1.61854e-05	0.000610837	T01E8.8
C17H12.4	188.589	1.54944	0.415161	3.73214	0.000189859	0.0041912	C17H12.4
Y113G7B.12	173.532	1.55094	0.403656	3.84224	0.000121917	0.00295788	Y113G7B.12
ZK688.2	823.233	1.56493	0.442054	3.54014	0.000399915	0.00748025	ZK688.2
R02D5.3	127.158	1.56635	0.282942	5.53593	3.09579e-08	3.04385e-06	R02D5.3
ZK418.7	72.5601	1.58386	0.324283	4.88419	1.03854e-06	6.23334e-05	ZK418.7
K08D8.6	421.546	1.58553	0.283494	5.59282	2.23416e-08	2.40213e-06	K08D8.6
ZK430.8	1809.89	1.58799	0.317536	5.00099	5.70379e-07	3.69018e-05	mlt-7
ZK185.5	62.0106	1.59931	0.370505	4.31656	1.5848e-05	0.000602666	ZK185.5
Y22D7AR.9	83.7859	1.60427	0.383696	4.1811	2.90099e-05	0.000985347	fbxa-74
F20G2.5	44.4802	1.61115	0.427975	3.76459	0.000166824	0.00378903	F20G2.5
F22F4.4	275.627	1.61832	0.423406	3.82215	0.000132295	0.00315839	F22F4.4
T01E8.2	103.174	1.62338	0.44392	3.65692	0.000255265	0.00523312	ref-1
T04F3.4	121.311	1.62406	0.434304	3.73946	0.000184415	0.00409521	T04F3.4
Y51A2D.4	507.037	1.62807	0.375685	4.33361	1.46684e-05	0.000563546	hmit-1.1
C07E3.3	827.484	1.62832	0.386542	4.21253	2.5253e-05	0.000883854	C07E3.3
F54A5.2	590.094	1.63438	0.373567	4.37508	1.21388e-05	0.000486365	cutl-20
C54D10.7	80.5321	1.63636	0.427569	3.82714	0.000129643	0.00310003	dct-3
Y82E9BL.10	46.1662	1.65621	0.388581	4.2622	2.02427e-05	0.000743308	fbxa-14
Y17D7B.1	20.8073	1.65697	0.475203	3.48688	0.000488694	0.00870494	nhr-231
F22B8.6	502.084	1.66122	0.287671	5.77471	7.70839e-09	1.00176e-06	cth-1
H20E11.1	114.16	1.67283	0.457414	3.65714	0.000255043	0.00523312	H20E11.1
Y113G7B.14	119.752	1.67779	0.344976	4.86348	1.15338e-06	6.7863e-05	Y113G7B.14
ZC434.9	1142.24	1.68356	0.336558	5.00228	5.66548e-07	3.68133e-05	ZC434.9
F22G12.1	55.1134	1.6903	0.426614	3.96213	7.42839e-05	0.00204829	F22G12.1
W01B11.5	1095.2	1.69056	0.370583	4.5619	5.06927e-06	0.00023528	pqn-72
H10D12.2	37.2453	1.69209	0.455773	3.71258	0.000205155	0.00444998	H10D12.2
ZC47.5	58.2961	1.69551	0.363256	4.66753	3.04846e-06	0.000156561	fbxa-31
F17H10.2	414.564	1.69685	0.431419	3.93319	8.3826e-05	0.00227365	F17H10.2
C04C11.1	67.569	1.70208	0.491663	3.46188	0.000536422	0.00940943	C04C11.1
T10H4.12	369.975	1.70367	0.27793	6.12987	8.7951e-10	1.66383e-07	cpr-3
Y82E9BL.13	82.8477	1.70931	0.340926	5.01373	5.33842e-07	3.48396e-05	fbxa-79
T03G11.8	191.825	1.71959	0.366743	4.68881	2.74801e-06	0.000142107	zig-6
F26C11.1	107.75	1.72305	0.4949	3.48161	0.000498403	0.00883585	F26C11.1
ZK622.2	13.5707	1.72661	0.500746	3.44809	0.000564576	0.00972072	gur-5
F35E12.9	235.179	1.72811	0.273374	6.32142	2.59172e-10	5.53332e-08	F35E12.9
E01A2.3	332.851	1.73305	0.302086	5.73695	9.63968e-09	1.20054e-06	lin-44
DH11.1	310.793	1.73717	0.493279	3.52168	0.000428815	0.00789241	glna-2
F52A8.3	33.1573	1.74617	0.437891	3.98769	6.672e-05	0.00190598	F52A8.3
T04F3.2	108.524	1.74667	0.495248	3.52686	0.000420514	0.00777291	T04F3.2
F33H12.7	21.8503	1.74734	0.489833	3.56721	0.000360796	0.00693963	F33H12.7
T19C4.7	5665.79	1.75412	0.45222	3.87892	0.000104923	0.00265774	nlp-33
C45G9.6	537.803	1.75934	0.322492	5.45544	4.88528e-08	4.53481e-06	C45G9.6
Y75B8A.2	361.75	1.76259	0.368106	4.78825	1.68239e-06	9.417e-05	nob-1
T22C8.6	146.911	1.76392	0.392411	4.49508	6.95447e-06	0.000297193	T22C8.6
C02F12.5	46.3418	1.77335	0.512364	3.46112	0.000537931	0.00941378	C02F12.5
F45E4.8	2797.49	1.78618	0.517497	3.45157	0.000557339	0.00964055	nlp-20
Y71G12B.2	23.0949	1.79267	0.492579	3.63935	0.00027333	0.00555771	Y71G12B.2
F09E5.10	25.4529	1.79468	0.477533	3.75823	0.00017112	0.0038783	F09E5.10
Y82E9BL.8	38.3825	1.807	0.364505	4.95742	7.14337e-07	4.50454e-05	fbxa-5
K08F8.7	38.5246	1.8127	0.444551	4.07759	4.55047e-05	0.00143474	K08F8.7
C07A9.4	49.4101	1.8257	0.374153	4.87954	1.06331e-06	6.35646e-05	ncx-6
F14F9.4	255.892	1.82654	0.524118	3.48498	0.000492183	0.00874634	F14F9.4
C13D9.1	23.1471	1.82844	0.526105	3.47542	0.000510049	0.00901027	srr-6
Y69A2AL.2	226.364	1.83455	0.416972	4.39969	1.08408e-05	0.000443877	Y69A2AL.2
F38A6.5	170.849	1.83482	0.256463	7.1543	8.41014e-13	3.49138e-10	F38A6.5
C09G9.5	31.1796	1.8351	0.475356	3.86049	0.000113161	0.00279787	C09G9.5
T19D2.1	533.424	1.85292	0.35007	5.29302	1.20314e-07	9.79865e-06	T19D2.1
C50B8.5	72.1422	1.86543	0.314951	5.92291	3.16291e-09	4.77472e-07	C50B8.5
C41D7.2	349.753	1.87053	0.348018	5.37482	7.66606e-08	6.73937e-06	ptr-3
K01A6.7	55.275	1.87586	0.451301	4.15656	3.23075e-05	0.00107232	K01A6.7
F58A4.1	40.5892	1.87838	0.369679	5.0811	3.75264e-07	2.52627e-05	F58A4.1
T10H4.11	44.8227	1.87921	0.52402	3.58615	0.000335597	0.00656478	cyp-34A2
T13F3.8	21.564	1.88378	0.430636	4.37441	1.2176e-05	0.000486551	T13F3.8
T05B11.4	42.2145	1.88412	0.374042	5.0372	4.72401e-07	3.11014e-05	T05B11.4
F53C11.1	209.994	1.88471	0.487092	3.86931	0.000109143	0.00272765	F53C11.1
K09C8.1	770.264	1.90289	0.425668	4.47036	7.8087e-06	0.000328735	pbo-4
C08F11.5	34.2905	1.92128	0.541186	3.55013	0.000385038	0.00729328	fbxa-98
T05A7.1	95.3786	1.92957	0.436269	4.42289	9.73889e-06	0.000406558	T05A7.1
H14A12.4	36.6593	1.93473	0.47818	4.04603	5.2093e-05	0.00159535	mls-1
E03H4.8	282.907	1.93711	0.430547	4.49918	6.82149e-06	0.000293796	E03H4.8
Y37A1A.3	205.268	1.9474	0.370989	5.24921	1.52752e-07	1.20788e-05	Y37A1A.3
Y49F6B.12	68.4005	1.9634	0.52496	3.7401	0.00018395	0.00409096	Y49F6B.12
C51E3.10	77.9008	2.0047	0.340896	5.88068	4.08591e-09	5.87154e-07	C51E3.10
C25F9.11	483.166	2.00587	0.522123	3.84176	0.000122154	0.00295852	C25F9.11
C54D2.4	191.403	2.02096	0.392119	5.15394	2.55063e-07	1.84151e-05	sul-3
T13F3.3	16.9349	2.03533	0.578652	3.51737	0.000435843	0.00796293	nhr-127
C02D4.1	73.8905	2.054	0.576585	3.56236	0.000367536	0.00705112	jud-4
F40G12.6	13.5872	2.05845	0.584998	3.51873	0.000433615	0.00794164	F40G12.6
H01G02.1	281.589	2.06193	0.37731	5.46483	4.63344e-08	4.32793e-06	H01G02.1
F35E12.5	793.75	2.06245	0.343757	5.99973	1.9765e-09	3.17622e-07	F35E12.5
Y51A2D.21	163.051	2.06991	0.420422	4.92342	8.5043e-07	5.23032e-05	Y51A2D.21
F55H12.4	3203.42	2.07138	0.505091	4.10101	4.11354e-05	0.00131265	F55H12.4
Y18D10A.23	192.266	2.08495	0.341864	6.09878	1.06882e-09	1.97203e-07	Y18D10A.23
H06A10.1	220.144	2.08523	0.523997	3.97947	6.90691e-05	0.00195871	H06A10.1
T09B9.1	88.5884	2.0859	0.375124	5.56055	2.68922e-08	2.73404e-06	T09B9.1
C23H4.6	50.8855	2.08917	0.408525	5.11394	3.15502e-07	2.18295e-05	C23H4.6
Y43F8B.14	43.1611	2.09094	0.428862	4.87555	1.08506e-06	6.46065e-05	Y43F8B.14
C06E1.3	376.207	2.13302	0.360247	5.921	3.19997e-09	4.78236e-07	C06E1.3
E04D5.3	399.368	2.13689	0.519996	4.10944	3.96624e-05	0.00127474	cut-4
K10H10.4	258.78	2.15154	0.37027	5.81074	6.21959e-09	8.37403e-07	K10H10.4
C17H1.7	131.994	2.16108	0.321601	6.71977	1.82016e-11	5.12426e-09	C17H1.7
T24A11.3	1603.52	2.18766	0.332883	6.57186	4.96914e-11	1.28041e-08	toh-1
F21H7.1	68.9322	2.19525	0.359469	6.10692	1.01574e-09	1.89754e-07	gst-22
H04M03.2	63.2787	2.20255	0.512291	4.29941	1.71257e-05	0.000638262	nspb-6
C13B7.6	63.5026	2.21377	0.501748	4.41212	1.02363e-05	0.000423734	C13B7.6
F55F8.8	28.3904	2.21795	0.557562	3.97793	6.95167e-05	0.00196394	F55F8.8
C32C4.2	40.6898	2.22132	0.465186	4.77512	1.79599e-06	9.97811e-05	aqp-6
F27E5.7	33.7736	2.22577	0.437989	5.0818	3.7387e-07	2.52627e-05	F27E5.7
R186.4	265.905	2.23428	0.405286	5.51285	3.53063e-08	3.42632e-06	lin-46
F38A6.4	417.083	2.2465	0.493087	4.55599	5.21403e-06	0.000240505	F38A6.4
H23L24.5	17.9936	2.2679	0.582314	3.89464	9.83455e-05	0.00252973	pme-4
ZK250.5	78.595	2.2792	0.644465	3.53657	0.00040536	0.00755374	math-47
Y37B11A.1	133.967	2.28334	0.381787	5.98067	2.22227e-09	3.45956e-07	cutl-23
F26F12.5	40.9188	2.28585	0.624176	3.6622	0.000250062	0.00514764	F26F12.5
F08G5.4	3393.14	2.28926	0.409575	5.58936	2.2791e-08	2.43294e-06	col-130
ZK867.3	70.532	2.3131	0.380828	6.07387	1.24861e-09	2.14488e-07	spp-22
C49G7.12	16.679	2.31806	0.621214	3.7315	0.000190345	0.00419411	C49G7.12
F36H1.11	81.7986	2.32042	0.487845	4.75646	1.97013e-06	0.000108248	F36H1.11
C49G7.7	11.1188	2.32468	0.664424	3.49878	0.000467387	0.00843751	C49G7.7
F20D6.3	15.98	2.32905	0.531881	4.37889	1.19287e-05	0.000481617	srp-8
M03E7.2	91.3324	2.33658	0.586071	3.98686	6.69549e-05	0.00190598	M03E7.2
C07G3.2	121.905	2.33739	0.599729	3.89741	9.72269e-05	0.00251394	irg-1
F15B9.9	36.0145	2.3383	0.39618	5.90213	3.58847e-09	5.30986e-07	dsl-7
F15B9.6	51.7161	2.33896	0.564316	4.14477	3.40148e-05	0.00111481	F15B9.6
E02C12.8	54.8628	2.34403	0.622215	3.76724	0.000165064	0.00376622	E02C12.8
Y57G11C.42	620.949	2.34765	0.552706	4.24756	2.16114e-05	0.000780151	Y57G11C.42
F53E4.1	1082.76	2.36421	0.348528	6.78341	1.17369e-11	3.57976e-09	F53E4.1
F38A6.2	556.787	2.37049	0.332141	7.137	9.53879e-13	3.75151e-10	elp-1
T11B7.3	2573.43	2.39171	0.451903	5.29252	1.20639e-07	9.79865e-06	col-118
R07G3.2	226.991	2.39307	0.450175	5.31587	1.06147e-07	8.88319e-06	lips-17
C36B7.5	491.59	2.39983	0.564743	4.24941	2.14334e-05	0.000777077	C36B7.5
F42C5.7	3296.15	2.41533	0.37099	6.51051	7.48983e-11	1.83501e-08	grl-4
D1014.7	28.9657	2.42982	0.560268	4.33689	1.44513e-05	0.000557699	D1014.7
B0310.6	26.2214	2.44614	0.606633	4.03233	5.52274e-05	0.0016708	B0310.6
K08E3.1	1949.14	2.44652	0.310235	7.88602	3.1198e-15	2.53419e-12	tyr-2
Y37H2A.14	249.127	2.45135	0.419217	5.84745	4.99176e-09	6.89834e-07	Y37H2A.14
T24C4.4	74.2046	2.47051	0.498858	4.95233	7.33283e-07	4.60459e-05	T24C4.4
T21C9.9	876.156	2.47068	0.606596	4.07302	4.64073e-05	0.00145705	T21C9.9
Y65B4BR.9	45.6145	2.47458	0.479242	5.16352	2.42346e-07	1.76676e-05	ceh-9
C25F9.7	275.997	2.47778	0.611495	4.05201	5.07795e-05	0.00156798	srw-86
C18H7.11	75.7822	2.48935	0.464289	5.36163	8.24739e-08	7.16612e-06	C18H7.11
C42D4.3	2017.66	2.49112	0.459453	5.42191	5.89641e-08	5.30854e-06	C42D4.3
F13B6.2	106.496	2.50261	0.413118	6.05786	1.37944e-09	2.31638e-07	F13B6.2
F15H10.2	1111.28	2.52068	0.422904	5.96042	2.51594e-09	3.87636e-07	col-13
ZK1307.2	91.8108	2.52542	0.440634	5.73133	9.96473e-09	1.22068e-06	ZK1307.2
Y41D4B.15	11.0325	2.55986	0.629108	4.06903	4.721e-05	0.00147297	Y41D4B.15
C41G7.8	34.041	2.56236	0.443846	5.7731	7.78284e-09	1.00271e-06	C41G7.8
C50B6.7	404.059	2.5676	0.534606	4.80279	1.56467e-06	8.80368e-05	C50B6.7
ZK402.3	28.9802	2.57544	0.453814	5.67509	1.38618e-08	1.61848e-06	ZK402.3
Y38E10A.17	32.3466	2.57577	0.439711	5.85786	4.68863e-09	6.54874e-07	Y38E10A.17
F55C12.7	156.103	2.57888	0.33637	7.66681	1.76332e-14	1.09803e-11	tag-234
Y61B8A.4	20.7966	2.58578	0.50614	5.10883	3.24157e-07	2.22226e-05	fbxa-85
Y110A2AM.4	33.181	2.62884	0.74623	3.52283	0.000426969	0.00786812	Y110A2AM.4
Y43F8B.15	8.37451	2.6295	0.739571	3.55544	0.000377349	0.00719979	Y43F8B.15
F35B3.4	1111.35	2.66424	0.448693	5.93778	2.88902e-09	4.40575e-07	F35B3.4
Y38E10A.19	34.5423	2.68016	0.596266	4.49491	6.96002e-06	0.000297193	nhr-235
F27E11.1	63.8256	2.68346	0.730206	3.67493	0.000237917	0.00496602	F27E11.1
B0334.13	108.007	2.68434	0.615193	4.36342	1.28046e-05	0.000504919	B0334.13
C05B5.5	8.34332	2.71906	0.785582	3.46121	0.000537757	0.00941378	C05B5.5
D2092.8	851.481	2.7201	0.599792	4.53507	5.7584e-06	0.000257662	D2092.8
C17H12.6	17.1416	2.77598	0.598866	4.63541	3.56239e-06	0.000176877	C17H12.6
F18G5.2	67.3144	2.78815	0.540375	5.15966	2.474e-07	1.79485e-05	pes-8
Y39A3A.4	24.7844	2.79031	0.612846	4.55304	5.28759e-06	0.00024151	Y39A3A.4
F35E12.4	15.9761	2.81316	0.811201	3.46789	0.000524553	0.00924462	F35E12.4
C24G6.7	447.501	2.84217	0.408974	6.94952	3.66532e-12	1.24496e-09	grl-1
C01G12.2	24.5668	2.87159	0.736098	3.9011	9.57557e-05	0.0024975	nspb-7
C06E8.5	335.357	2.89944	0.468125	6.19374	5.87541e-10	1.18659e-07	C06E8.5
C05A9.1	457.038	2.90183	0.599542	4.84008	1.29788e-06	7.57688e-05	pgp-5
F11E6.11	157.796	2.94708	0.735252	4.00826	6.11677e-05	0.00179245	F11E6.11
F52B11.4	954.499	2.95976	0.524553	5.64244	1.67652e-08	1.89159e-06	col-133
C10C5.2	48.451	2.9961	0.730906	4.09916	4.14647e-05	0.00131569	C10C5.2
Y95B8A.2	1234.52	3.01353	0.53415	5.64174	1.68339e-08	1.89159e-06	Y95B8A.2
F15B9.11	35.2225	3.08233	0.51261	6.013	1.82124e-09	2.99104e-07	F15B9.11
F07C3.1	122.757	3.11804	0.583863	5.34037	9.27564e-08	7.96692e-06	ptd-2
C50H2.10	8.5123	3.15236	0.846892	3.72227	0.000197442	0.004314	fipr-11
ZK353.2	21.4055	3.16509	0.588095	5.38195	7.36846e-08	6.51607e-06	ZK353.2
C29F3.3	127.236	3.17116	0.268513	11.8101	3.46221e-32	1.72476e-28	C29F3.3
C12D8.19	28.5528	3.23874	0.609424	5.31443	1.06991e-07	8.88319e-06	fipr-9
K04C2.5	25.0208	3.25998	0.600404	5.42964	5.64678e-08	5.1458e-06	K04C2.5
C01G12.10	17.4245	3.31216	0.629054	5.2653	1.39962e-07	1.12458e-05	nspb-8
T23B12.5	85.1633	3.31787	0.586861	5.65358	1.57136e-08	1.80646e-06	T23B12.5
F07F6.5	150.68	3.34828	0.465931	7.18622	6.66111e-13	2.84429e-10	dct-5
T07A5.1	71.7392	3.42894	0.357305	9.59666	8.25748e-22	1.5426e-18	T07A5.1
C03A7.7	204.159	3.5428	0.875372	4.04719	5.18352e-05	0.00159071	abu-6
T22D1.17	15.2467	3.54939	0.906469	3.91562	9.01717e-05	0.00241076	T22D1.17
T23H4.3	91.5648	3.62726	0.374292	9.69099	3.29333e-22	7.03125e-19	nas-5
K10H10.5	22.5114	3.80231	0.635025	5.98766	2.12881e-09	3.34896e-07	K10H10.5
C50H2.12	40.2228	4.11146	0.731854	5.61788	1.93319e-08	2.12438e-06	fipr-10
B0024.4	97.9075	4.29331	0.491667	8.73214	2.49895e-18	2.95484e-15	B0024.4
Y38H6C.22	29.0614	4.33019	1.02821	4.21138	2.53814e-05	0.000884891	abf-4
F57G4.8	18.6282	4.38784	0.696324	6.30143	2.94918e-10	6.20781e-08	fbxa-192
H20E11.2	10.3924	4.54049	0.96102	4.72466	2.30505e-06	0.000122594	H20E11.2
F38A5.10	8.07403	4.58656	0.994798	4.61054	4.01615e-06	0.000194875	nspb-4
C06G4.6	5.28816	4.76609	1.18799	4.01189	6.02345e-05	0.00177206	C06G4.6
K01B6.4	22.1923	4.8784	1.10352	4.42075	9.83596e-06	0.000408412	K01B6.4
Y18D10A.2	5.50866	5.00601	1.41542	3.53677	0.000405049	0.00755374	Y18D10A.2
F44G3.2	542.036	5.60961	0.430022	13.0449	6.79226e-39	1.0151e-34	F44G3.2

## Sheet: GeneGroups0.01
	OP37Down	OP37Up
# of genes in each group	508	363
# of overlappin gPHA-4 bound	138	94
% of overlappin gPHA-4 bound	27.1654	25.8953
	clec-15	fem-2
	nspc-12	ari-1
	hsp-16.1	F55A3.1
	col-126	sec-10
	vit-2	sek-1
	hsp-16.49	acp-5
	F15E11.1	lbp-5
	his-46	fcp-1
	Y73B3B.1	fut-1
	ptc-2	klp-12
	nspc-13	eri-6
	Y19D2B.1	dyf-14
	Y105C5A.12	igcm-3
	nspc-16	F13E6.4
	nspc-19	C37A2.8
	Y38C1AB.5	F09F7.5
	F33H1.6	F37B12.3
	vit-1	Y38F2AR.6
	his-44	C16C2.4
	Y19D10B.7	riok-1
	srw-85	fmi-1
	F58E6.4	F13B12.6
	C30F2.4	M106.3
	spp-23	T07C4.10
	F56H9.6	K10B4.3
	F07C4.6	ZK177.8
	col-124	sqv-5
	K02E2.1	atg-16.1
	W03B1.3	F54D1.6
	nspc-18	cki-2
	Y47D7A.12	T23F11.1
	T07D10.1	glb-11
	srt-42	T12E12.1
	F47E1.1	W06F12.2
	D2005.1	R03H10.7
	T10D4.15	ZC581.3
	K09C6.9	bre-3
	W01C9.2	F56D5.6
	W05B2.2	R11D1.1
	clec-78	cdr-2
	T24F1.5	grsp-2
	C25G6.4	T06D8.1
	Y60C6A.1	F46F11.1
	R11D1.12	gtl-1
	T13F3.7	ain-2
	T12E12.6	W01F3.1
	C07A12.2	eri-7
	C05G5.7	F56C9.8
	EGAP4.1	H14N18.4
	Y49G5A.1	ptr-23
	dpy-9	ima-1
	R06F6.7	cdh-3
	lpr-4	Y77E11A.12
	F14F3.4	zip-5
	lpr-3	sqv-1
	C48D5.3	C34C12.4
	Y45F10D.2	C25F9.10
	nspc-17	klf-3
	Y54G2A.37	B0403.3
	col-46	F02D8.4
	pqn-75	deg-3
	T17H7.1	gck-1
	C02G6.3	acy-4
	dpy-3	Y32F6B.1
	hsp-12.2	F23H12.3
	nspc-14	F26E4.7
	nhr-73	Y41D4B.16
	B0294.1	lact-2
	cky-1	pal-1
	ins-35	T12A2.1
	dpy-10	dpf-2
	T13C5.7	M7.12
	F17B5.6	snb-2
	C30H6.10	F21G4.1
	phat-3	vglu-3
	Y53F4B.20	Y43E12A.2
	hacd-1	ugtp-1
	F21F12.1	acr-16
	dao-2	math-26
	nspc-9	aman-3
	col-149	dve-1
	rpl-37	fmo-1
	ins-30	dos-1
	Y37A1B.7	C06B8.2
	K07D4.5	mec-17
	acbp-7	nhr-232
	spp-17	T07C12.11
	C54C8.4	gfrp-1
	ceh-23	C25A1.5
	C14B9.10	ech-8
	dpy-8	C01F1.6
	dpy-2	egl-5
	cutl-6	wrt-3
	F13C5.5	T25D10.1
	F12E12.11	ttr-59
	inx-6	K03A11.5
	ugt-42	F29G6.1
	F08A8.2	C08B6.3
	col-47	nex-3
	M03B6.3	C17H12.13
	mlt-11	abt-4
	K02D3.1	daf-9
	C34F6.1	C53A5.5
	Y87G2A.19	fbxa-105
	ZC84.6	M03A8.3
	mtl-2	cpg-9
	F28G4.2	acr-24
	dpy-7	C49C8.5
	ZC15.10	W05B2.7
	F25D1.5	cdf-1
	oac-51	T28F3.8
	clec-80	M05B5.2
	F15A4.6	T19C9.8
	T01C4.1	C17G1.5
	K02E10.4	pha-4
	wrt-2	B0563.7
	Y41G9A.2	aex-1
	dpy-17	tag-233
	T22F7.3	col-144
	T03F1.11	pdhk-2
	nlp-42	C34F6.11
	F15D4.4	F10C2.3
	noah-1	ZK1055.6
	cdh-12	tbc-19
	F09F9.2	des-2
	K10D3.4	M04C3.1
	F44E5.4	Y47G6A.19
	F20A1.4	math-35
	F32D1.11	glh-2
	noah-2	fbxa-60
	F33E2.5	ced-12
	odr-10	clc-1
	nspc-10	ZK1010.8
	ins-33	F16F9.4
	lpr-6	Y38C1AA.6
	T24E12.9	tag-120
	R02C2.7	sem-4
	clec-205	Y42A5A.3
	C54D10.3	F21A3.3
	F02E11.2	T05F1.11
	nspc-20	fbxa-19
	F54B11.9	K05C4.11
	T27A10.6	T03F7.7
	F47C12.1	R10H1.1
	Y41G9A.10	T25F10.3
	F13D12.9	fbxa-59
	R148.7	ceh-14
	gst-24	Y75B8A.29
	scl-6	mtd-1
	C15C8.3	ZK84.1
	gst-12	mom-1
	C25G6.3	math-24
	lin-42	ZK896.5
	C18A11.2	C11E4.1
	Y57G11B.97	F53B2.8
	ins-27	lec-11
	M02E1.2	pho-11
	M03B6.1	fbl-1
	K08B12.1	unc-108
	col-128	F28H7.8
	lpr-5	C25F9.5
	C24A1.2	mom-2
	Y40B10A.7	Y48G10A.6
	T13C5.3	cyp-33C5
	Y38E10A.24	T10E9.3
	F53B3.2	C49C3.9
	cal-3	Y47H10A.5
	Y67D8A.3	Y51A2D.15
	T03G6.1	ZC239.16
	R06C1.4	F59C6.11
	F08G12.8	F56B6.6
	mltn-9	F35E12.10
	Y54E2A.1	inx-20
	F17A9.3	math-4
	sym-5	F10A3.17
	flp-1	T01E8.8
	ins-24	C17H12.4
	F29B9.11	Y113G7B.12
	M6.4	ZK688.2
	Y73E7A.8	R02D5.3
	nhr-74	ZK418.7
	vap-1	K08D8.6
	Y38F2AR.9	mlt-7
	ZC449.1	ZK185.5
	nlp-47	fbxa-74
	wrt-10	F20G2.5
	Y113G7A.16	F22F4.4
	T26C5.2	ref-1
	F48G7.4	T04F3.4
	myo-2	hmit-1.1
	tin-9.1	C07E3.3
	hrg-4	cutl-20
	M04G7.1	dct-3
	plp-2	fbxa-14
	R193.2	nhr-231
	H14E04.1	cth-1
	Y105E8A.13	H20E11.1
	Y116A8C.3	Y113G7B.14
	C45G9.11	ZC434.9
	wrt-1	F22G12.1
	B0495.6	pqn-72
	Y57G11C.45	H10D12.2
	T20F5.4	fbxa-31
	cnc-3	F17H10.2
	atf-2	C04C11.1
	Y55F3AM.14	cpr-3
	H42K12.3	fbxa-79
	K07C5.9	zig-6
	let-75	F26C11.1
	his-24	gur-5
	ech-7	F35E12.9
	ZC449.2	lin-44
	eya-1	glna-2
	fmo-4	F52A8.3
	R09E12.9	T04F3.2
	Y55F3BR.2	F33H12.7
	Y71G12B.6	nlp-33
	cwp-4	C45G9.6
	ddp-1	nob-1
	clec-198	T22C8.6
	clec-42	C02F12.5
	cdh-10	nlp-20
	fkb-5	Y71G12B.2
	tag-10	F09E5.10
	sym-1	fbxa-5
	T22B11.3	K08F8.7
	F23F12.9	ncx-6
	T08G2.2	F14F9.4
	nex-4	srr-6
	F48F5.6	Y69A2AL.2
	R07E3.6	F38A6.5
	F53A3.7	C09G9.5
	T21B6.3	T19D2.1
	R57.2	C50B8.5
	emo-1	ptr-3
	Y38H6C.16	K01A6.7
	Y37D8A.4	F58A4.1
	clec-64	cyp-34A2
	C11H1.5	T13F3.8
	Y38H6C.20	T05B11.4
	T09B9.3	F53C11.1
	D1005.1	pbo-4
	his-32	fbxa-98
	Y51F10.7	T05A7.1
	C45B11.6	mls-1
	daf-7	E03H4.8
	gcy-21	Y37A1A.3
	gcy-23	Y49F6B.12
	flp-17	C51E3.10
	C09F9.2	C25F9.11
	B0310.3	sul-3
	C40H1.6	nhr-127
	Y38H8A.1	jud-4
	ZK593.2	F40G12.6
	ins-4	H01G02.1
	C49G7.3	F35E12.5
	cpr-5	Y51A2D.21
	acbp-3	F55H12.4
	unc-42	Y18D10A.23
	W07B8.1	H06A10.1
	M03D4.4	T09B9.1
	T12D8.10	C23H4.6
	F45H10.2	Y43F8B.14
	Y73B6BL.35	C06E1.3
	Y54F10AM.6	cut-4
	tni-4	K10H10.4
	T19C4.1	C17H1.7
	ZK742.4	toh-1
	F41B4.2	gst-22
	gyg-2	nspb-6
	Y69A2AR.22	C13B7.6
	ugt-63	F55F8.8
	C24H11.5	aqp-6
	C15C7.4	F27E5.7
	T14B4.2	lin-46
	F38B2.2	F38A6.4
	W03D8.8	pme-4
	pqn-88	math-47
	clec-225	cutl-23
	C11H1.9	F26F12.5
	Y105E8A.11	col-130
	F58E10.7	spp-22
	T05C1.3	C49G7.12
	R07G3.6	F36H1.11
	H19M22.3	C49G7.7
	clec-10	srp-8
	tdc-1	M03E7.2
	mab-10	irg-1
	C34C12.6	dsl-7
	lpr-1	F15B9.6
	F53F4.16	E02C12.8
	K07C11.3	Y57G11C.42
	Y73B6BL.21	F53E4.1
	C01F1.3	elp-1
	gst-26	col-118
	mxl-3	lips-17
	ilys-5	C36B7.5
	flp-19	grl-4
	flp-13	D1014.7
	clec-72	B0310.6
	lys-8	tyr-2
	cpt-6	Y37H2A.14
	F33H2.8	T24C4.4
	F54A3.5	T21C9.9
	hil-2	ceh-9
	mlc-2	srw-86
	Y37D8A.18	C18H7.11
	ceh-34	C42D4.3
	F20G2.3	F13B6.2
	F11C7.2	col-13
	pdi-2	ZK1307.2
	pqn-25	Y41D4B.15
	BE0003N10.3	C41G7.8
	rpl-25.1	C50B6.7
	Y39A1A.20	ZK402.3
	far-8	Y38E10A.17
	peb-1	tag-234
	Y48G8AR.2	fbxa-85
	C02F12.3	Y110A2AM.4
	cst-2	Y43F8B.15
	C18B2.3	F35B3.4
	clec-63	nhr-235
	trap-4	F27E11.1
	K12H4.5	B0334.13
	gcy-22	C05B5.5
	Y41C4A.6	D2092.8
	nhr-6	C17H12.6
	F53B3.6	pes-8
	Y50D7A.10	Y39A3A.4
	F57F5.1	F35E12.4
	ZK643.3	grl-1
	tomm-22	nspb-7
	ubc-26	C06E8.5
	T02H6.11	pgp-5
	col-117	F11E6.11
	K07A12.2	col-133
	fkb-2	C10C5.2
	Y57A10A.29	Y95B8A.2
	lgc-26	F15B9.11
	F54E4.4	ptd-2
	cah-5	fipr-11
	C39D10.2	ZK353.2
	cutl-9	C29F3.3
	acs-3	fipr-9
	dhs-16	K04C2.5
	K03B4.4	nspb-8
	T25F10.6	T23B12.5
	tnc-2	dct-5
	mua-6	T07A5.1
	ins-26	abu-6
	C04H5.1	T22D1.17
	aldo-1	nas-5
	Y54G2A.23	K10H10.5
	Y67D2.3	fipr-10
	clec-56	B0024.4
	snr-5	abf-4
	tni-3	fbxa-192
	cpn-3	H20E11.2
	gsto-1	nspb-4
	K10H10.2	C06G4.6
	E02H1.8	K01B6.4
	C53C9.2	Y18D10A.2
	lpd-5	F44G3.2
	W02H5.2
	C25A1.13
	fasn-1
	T28C12.2
	pbs-5
	F23H12.5
	snr-7
	eef-1A.2
	T04D3.5
	rnp-5
	ZK1320.3
	R186.8
	ahcy-1
	unc-122
	W02G9.4
	act-4
	F58F12.1
	Y92H12BR.2
	C14C6.2
	mlc-1
	clec-166
	dur-1
	C31E10.7
	F35A5.1
	F21D5.8
	unc-75
	mtss-1
	F46C8.3
	mrp-4
	gyg-1
	T03D8.2
	F46H5.3
	oig-2
	nlp-16
	gst-5
	flp-18
	eat-18
	R148.5
	F09B12.3
	C06G1.6
	ZK470.2
	rpb-11
	pmt-2
	Y105E8B.9
	B0365.1
	Y55F3AM.13
	tkt-1
	Y65B4BR.5
	glrx-10
	F25H2.4
	K08D12.3
	F54E2.4
	atp-3
	Y43F8B.1
	F23B12.5
	rab-6.2
	Y67H2A.5
	mel-32
	K10C9.3
	tomm-20
	C07A9.2
	ketn-1
	pdi-1
	cor-1
	Y7A9A.1
	syg-2
	W01A11.1
	ckr-2
	C01F6.9
	F25H2.5
	aman-1
	unc-27
	rsp-5
	R151.10
	lev-11
	Y95D11A.1
	rpb-7
	mdh-2
	tag-18
	nlp-9
	unc-54
	unc-25
	F08B4.7
	cyn-7
	C04C3.3
	unc-89
	F07A11.2
	Y56A3A.19
	deb-1
	Y69A2AR.31
	T05H4.5
	nhr-91
	gar-3
	ZK809.3
	Y119C1B.4
	F07C6.3
	F54D11.4
	aco-1
	unc-15
	W08F4.3
	Y7A5A.1
	cif-1
	hsp-25
	pbs-6
	unc-22
	T04G9.4
	iff-2
	atp-2
	smo-1
	T04A8.7
	asb-2
	F56H1.7
	F32H5.1
	gut-2
	pqn-42
	C46C11.1
	C14F11.1
	T21B10.1
	unc-87
	art-1
	C01B10.6
	D2063.3
	mnp-1
	B0491.5
	hum-6
	his-41
	R05G6.7
	R53.4
	ran-1
	eif-3.K
	asp-2
	T07D3.9
	T22F3.3
	H28O16.1
	F45E12.5
	Y69A2AR.18
	ran-4
	F59E12.1
	F38B2.4
	pat-6
	gpi-1
	C14F11.2
	pab-1
	C37E2.1
	K02F3.2

## Sheet: EnrichAn37Down
Tissue Enrichment Analysis Results
i
Term	Expected	Observed	Enrichment Fold Change	P value	Q value
excretory duct cell WBbt:0004540	0.91	7	7.7	3.2e-06	0.00099
epithelial system WBbt:0005730	96	141	1.5	3.4e-06	0.00099
PVD WBbt:0006831	54	88	1.6	3.9e-06	0.00099
outer labial sensillum WBbt:0005501	55	88	1.6	8.1e-06	0.00099
anal depressor muscle WBbt:0004292	8.9	22	2.5	4.3e-05	0.0027
sex organ WBbt:0008422	32	53	1.7	0.00019	0.0099
touch receptor neuron WBbt:0005237	37	59	1.6	0.0002	0.0099
lateral nerve cord WBbt:0006769	7.7	18	2.3	0.00033	0.013
Phenotype Enrichment Analysis Results
i
Term	Expected	Observed	Enrichment Fold Change	P value	Q value
antimicrobial gene expression increased WBPhenotype:0002539	1.4	12	8.7	7.8e-10	1.9e-07
transgene expression increased WBPhenotype:0001236	32	55	1.7	7.2e-05	0.0087
Gene Ontology Enrichment Analysis Results
i
Term	Expected	Observed	Enrichment Fold Change	P value	Q value
purine nucleotide metabolic process GO:0006163	3.1	15	4.8	1.2e-07	3.5e-05
ribose phosphate metabolic process GO:0019693	3.3	15	4.5	2.9e-07	4.3e-05
nucleoside phosphate metabolic process GO:0006753	4.1	15	3.6	5.1e-06	0.00051
molting cycle GO:0042303	2.1	10	4.8	8.1e-06	0.00061
envelope GO:0031975	6.9	20	2.9	9.3e-06	0.00061
collagen and cuticulin-based cuticle development GO:0040002	0.81	6	7.4	1.5e-05	0.00075
actin binding GO:0003779	2.3	10	4.3	2.3e-05	0.001
purine nucleoside diphosphate metabolic process GO:0009135	0.62	5	8	3.2e-05	0.0012
organic acid metabolic process GO:0006082	8.3	21	2.5	4.7e-05	0.0016
collagen trimer GO:0005581	1	6	5.8	7.7e-05	0.0023
myofibril GO:0030016	1.9	8	4.2	0.00012	0.0033
extracellular region GO:0005576	11	24	2.2	0.00018	0.0045
actin filament-based process GO:0030029	3.6	11	3.1	0.00031	0.0071
muscle system process GO:0003012	1.3	6	4.5	0.00036	0.0077
supramolecular polymer GO:0099081	5.9	15	2.5	0.00037	0.0077
structural constituent of cuticle GO:0042302	3.2	10	3.1	0.00044	0.0083
ATP synthesis coupled electron transport GO:0042773	1	5	5	0.00048	0.0085
RNA splicing via transesterification reactions GO:0000375	2.8	9	3.2	0.0006	0.01
outer membrane GO:0019867	0.7	4	5.7	0.00063	0.01
thioester metabolic process GO:0035383	0.79	4	5	0.0011	0.017
carbon-oxygen lyase activity GO:0016835	0.79	4	5	0.0011	0.017
respirasome GO:0070469	1.3	5	3.8	0.002	0.027
small nuclear ribonucleoprotein complex GO:0030532	0.91	4	4.4	0.0021	0.027
metal cluster binding GO:0051540	0.92	4	4.3	0.0023	0.028
striated muscle dense body GO:0055120	1.8	6	3.3	0.0023	0.028
monocarboxylic acid biosynthetic process GO:0072330	1	4	3.9	0.0038	0.044
glutathione transferase activity GO:0004364	1.1	4	3.8	0.0041	0.046
membrane-enclosed lumen GO:0031974	14	24	1.7	0.0041	0.046
P-body GO:0000932	0.68	3	4.4	0.0046	0.048
protein localization to mitochondrion GO:0070585	0.7	3	4.3	0.0051	0.051
NADH dehydrogenase complex GO:0030964	0.75	3	4	0.0067	0.065
pharyngeal pumping GO:0043050	1.2	4	3.4	0.0068	0.065
peptide biosynthetic process GO:0043043	6.7	13	2	0.0079	0.072
catalytic step 2 spliceosome GO:0071013	0.79	3	3.8	0.008	0.072
vitamin B6 binding GO:0070279	0.79	3	3.8	0.008	0.072
chromatin assembly or disassembly GO:0006333	0.81	3	3.7	0.0087	0.072
post-embryonic development GO:0009791	8.9	16	1.8	0.0089	0.072
polysaccharide metabolic process GO:0005976	1.3	4	3.1	0.0093	0.073
import into nucleus GO:0051170	0.83	3	3.6	0.0094	0.073
identical protein binding GO:0042802	2.4	6	2.5	0.0098	0.074

## Sheet: EnrichAn37Up
Tissue Enrichment Analysis Results
i
Term	Expected	Observed	Enrichment Fold Change	P value	Q value
intestine WBbt:0005772	84	117	1.4	0.00018	0.056
head mesodermal cell WBbt:0004697	38	60	1.6	0.00035	0.056
IL1VL WBbt:0004549	0.42	3	7.1	0.00081	0.085
IL1VR WBbt:0004547	0.43	3	6.9	0.0009	0.085
intestinal muscle WBbt:0005796	2.5	8	3.2	0.00093	0.085
IL1R WBbt:0004551	0.46	3	6.6	0.0011	0.085
ALA WBbt:0003955	0.47	3	6.4	0.0012	0.085
IL1L WBbt:0004553	0.47	3	6.4	0.0012	0.085
rectal valve cell WBbt:0005797	0.55	3	5.4	0.0023	0.085
midbody WBbt:0005740	9.8	19	1.9	0.0026	0.085
Phenotype Enrichment Analysis Results
i
Term	Expected	Observed	Enrichment Fold Change	P value	Q value
dauer constitutive WBPhenotype:0000012	1.3	8	6.4	5.6e-06	0.0013
transgene expression undetectable WBPhenotype:0001375	0.7	4	5.7	0.0007	0.084
Gene Ontology Enrichment Analysis Results
i
Term	Expected	Observed	Enrichment Fold Change	P value	Q value
Golgi stack GO:0005795	0.49	4	8.1	0.00013	0.04
immune system process GO:0002376	4.8	13	2.7	0.00038	0.056
